# Supplementary material for: Decoupling of mRNA and Protein Expression in Aging Brains Reveals the Age-Dependent Adaptation of Specific Gene Subsets
Source: MDPI journal article supplement (doi:10.3390/cells12040615), 2023-02-14

# Supplemental Figure S1

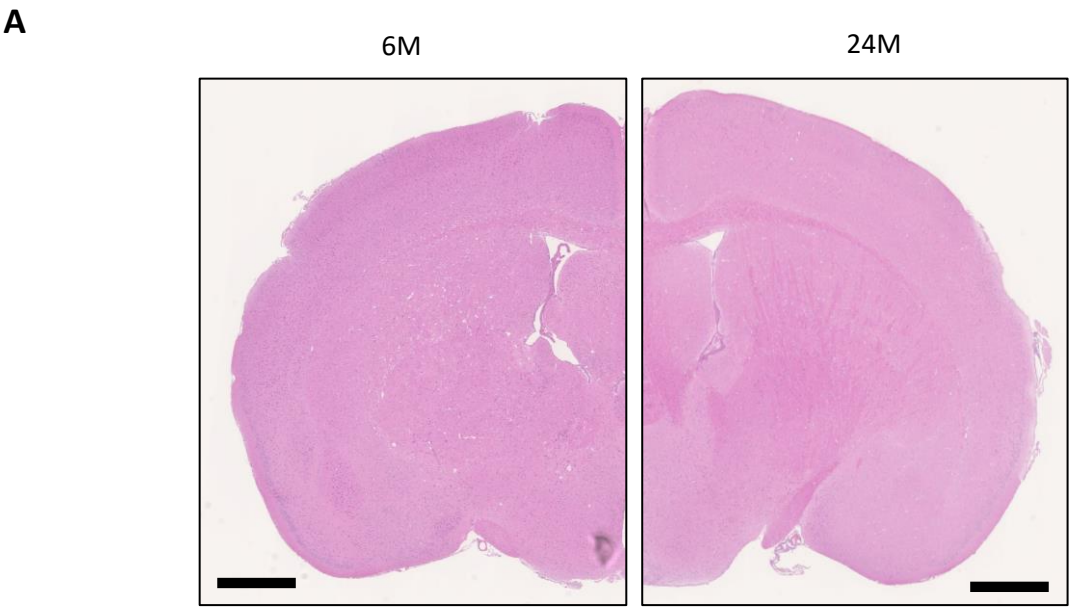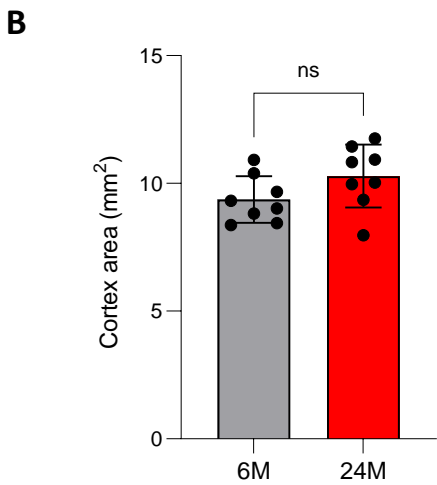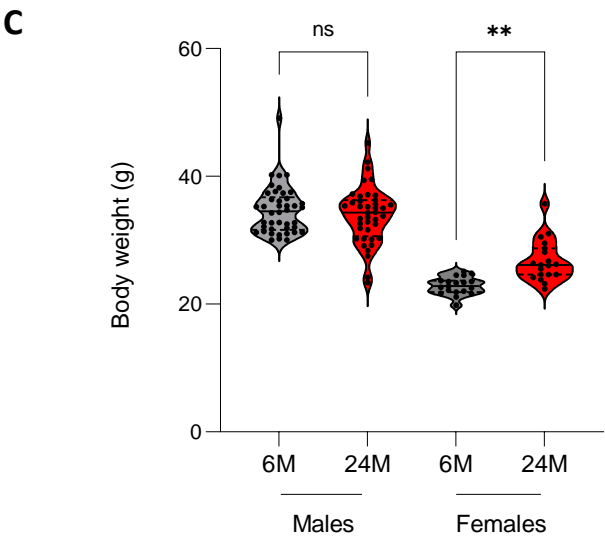

# Supplemental Figure S2

A

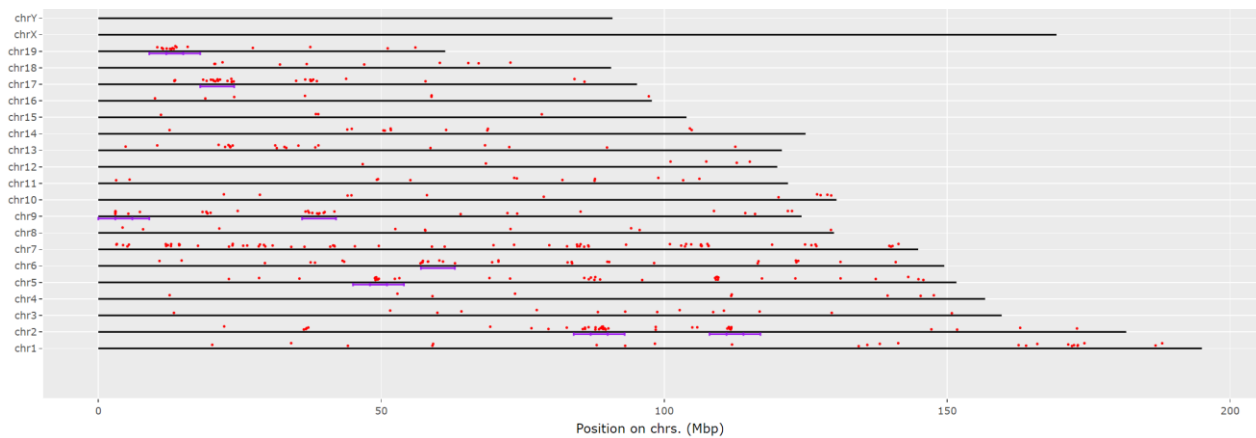

B

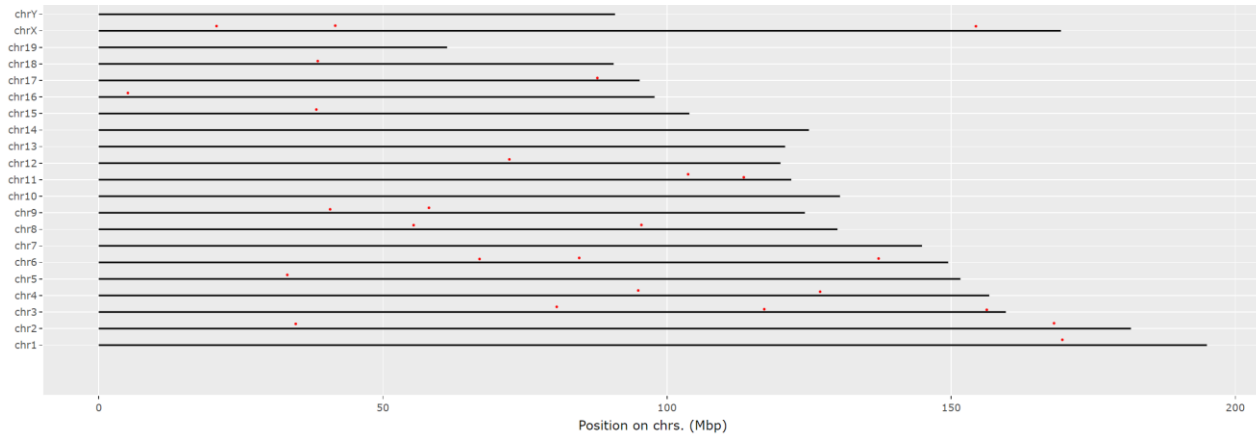

# Supplemental Figure S3

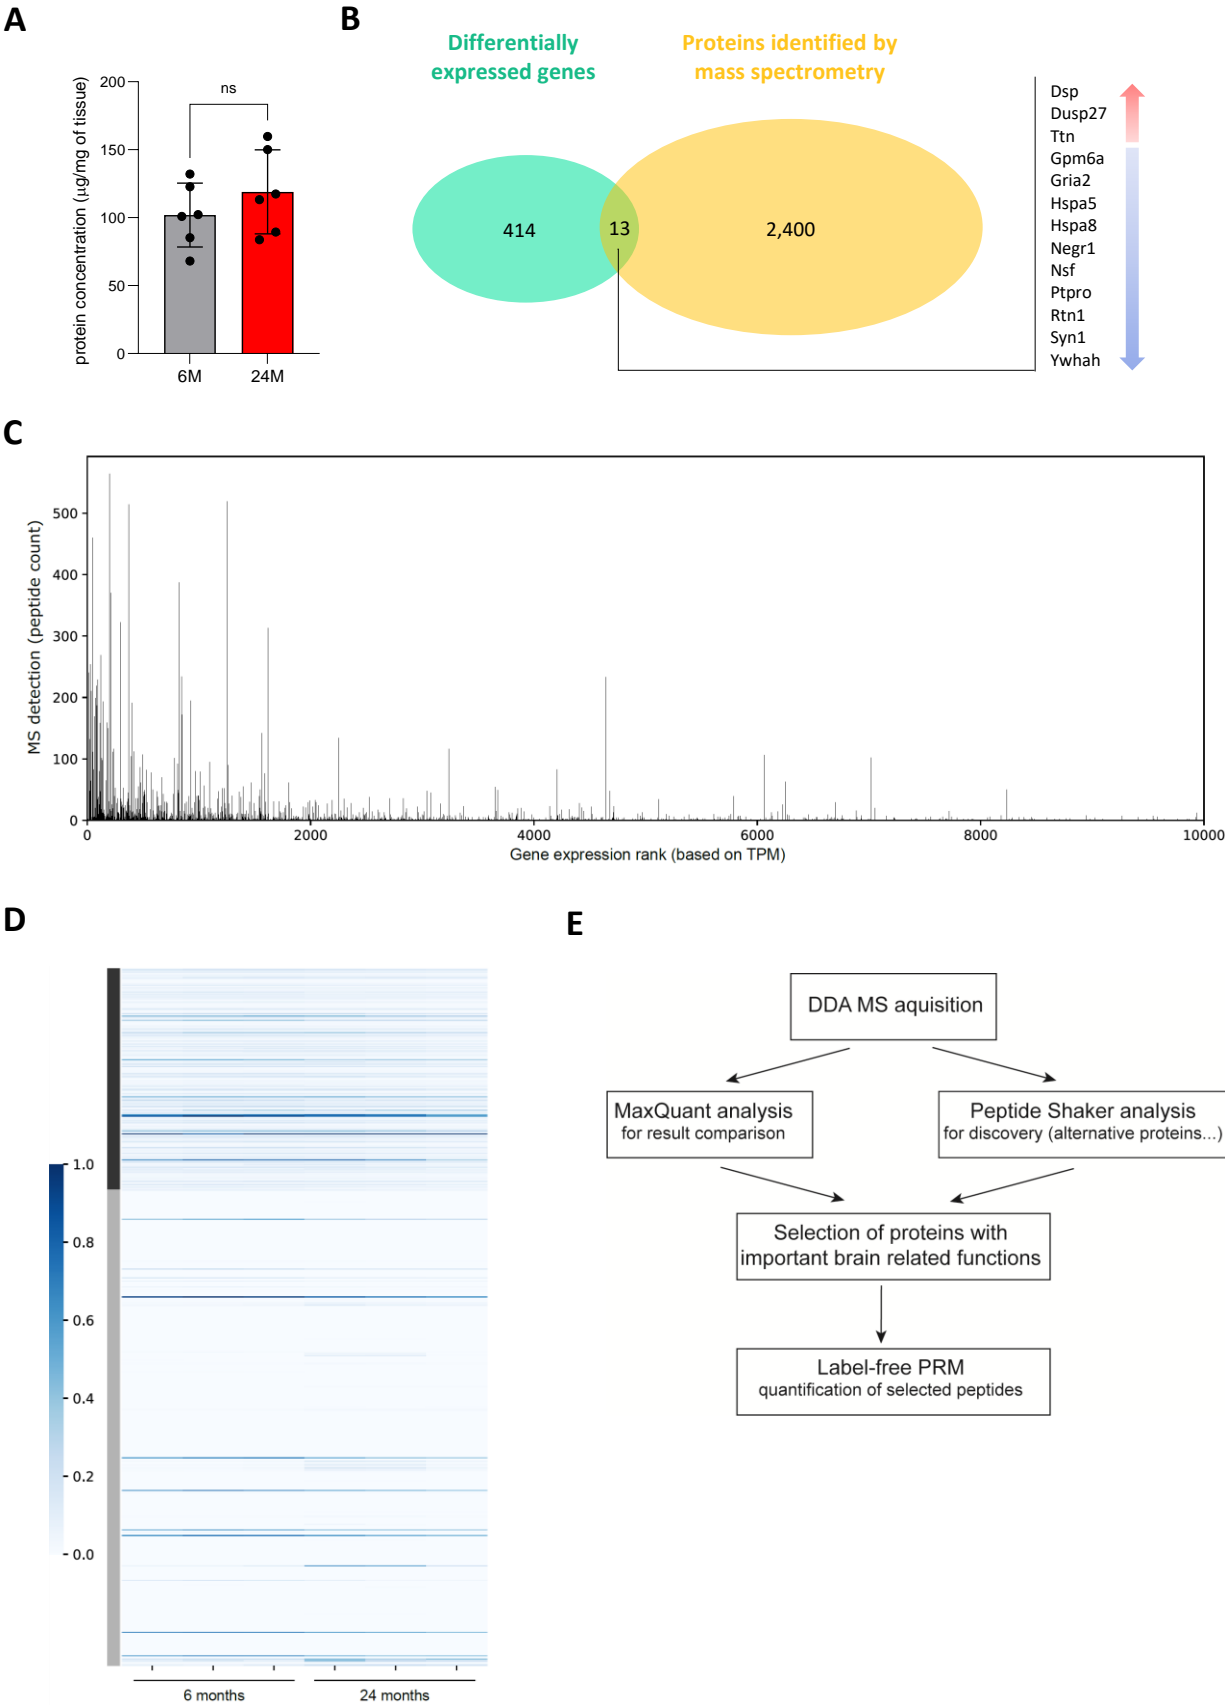

# Supplemental Figure S4

A

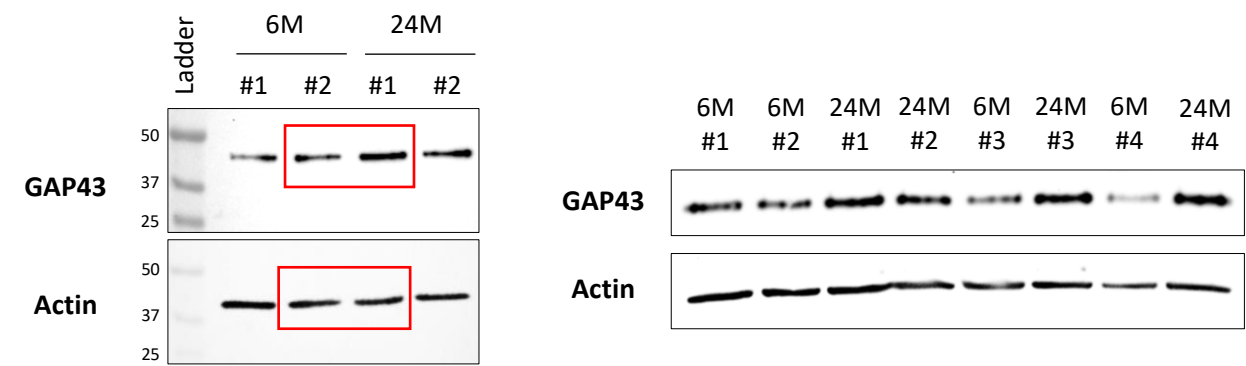

B

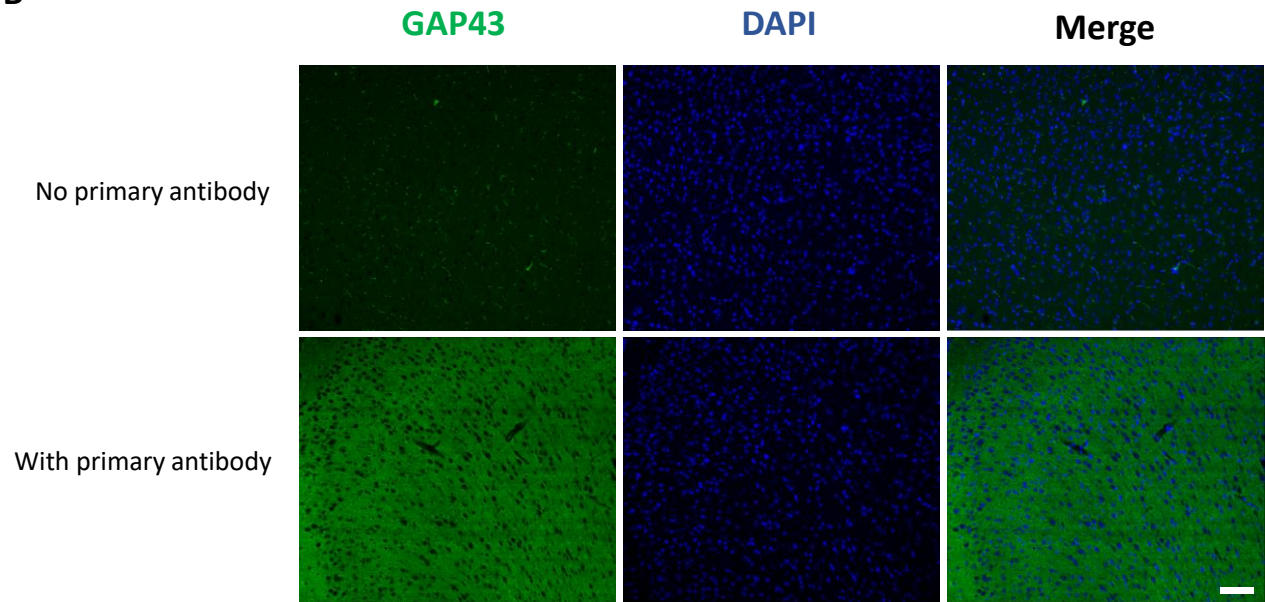

Supplement: s1 [file s1]
