# Supplementary material for: Decoupling of mRNA and Protein Expression in Aging Brains Reveals the Age-Dependent Adaptation of Specific Gene Subsets
Source: MDPI journal article supplement (doi:10.3390/cells12040615), 2023-02-14
Supplement: s1 [file s1]

## Supplemental Table S5

| DOWN    |        | UP      |         |          |          |        |          |          |        |
|---------|--------|---------|---------|----------|----------|--------|----------|----------|--------|
| Apoa1   | Pdcd5  | Abi1    | Atcay   | Dlgap1   | Gad1     | Lanc12 | Pafah1b1 | Psmc1    | Strap  |
| Apoo    | Pin1   | Abi2    | Atl1    | Dmtn     | Gad2     | Lmn2b  | Pak1     | Psmc4    | Tardbp |
| Arf5    | Ppa2   | Acaa2   | Bcat1   | Dnaja2   | Gap43    | Lrrc47 | Pcbp2    | Psmc5    | Tceal5 |
| Arl8a   | Rpl18  | Acad9   | Bcs1l   | Dnajc11  | Gps1     | Lsamp  | Pcca     | Psmd11   | Tmx3   |
| C1ql3   | Rpl19  | Acadl   | Bpnt1   | Dpysl5   | Gsk3a    | M6pr   | Pccb     | Psmd13   | Tmx4   |
| Cnksr2  | Rpl23a | Acadm   | Cacnb3  | Dync1li1 | Gucy1b3  | Maob   | Pcyox1l  | Psmd3    | Tom1l2 |
| Cplx2   | Rpl38  | Acadvl  | Cadm4   | Dync1li2 | H2afy    | Mapk3  | Pde1b    | Psmd5    | Tomm40 |
| Csrp1   | Rpl7a  | Acot9   | Camk2d  | Eif3e    | Hapln1   | Mapre2 | Pdia6    | Psmd6    | Tuba8  |
| Dctn3   | Rpl8   | Acs1l   | Cct5    | Eif4a1   | Hars     | Me3    | Pepd     | Ptpn9    | Txnrd1 |
| Diras1  | Rpl9   | Actr1b  | Cct6a   | Eif4a3   | Hebp1    | Mecp2  | Pick1    | Rars     | Uba3   |
| Dynll2  | Rps10  | Adk     | Cct7    | Elavl4   | Hexb     | Mtch1  | Pip4k2a  | Rmdn3    | Upf1   |
| Enoph1  | Rps26  | Adrbk1  | Cd200   | Entpd2   | Hnrnpl   | Nadk2  | Pip4k2c  | Rraga    | Vat1l  |
| Fabp5   | Stmn1  | Ahcy    | Cd47    | Epm2aip1 | Hnrnrm   | Nap1l4 | Pls3     | RtcA     | Vim    |
| Fam162a | Stmn2  | Ak5     | Cmpk2   | Erlin2   | Homer2   | Nisch  | Pmpca    | Ruvbl1   | Vps26b |
| Gng2    | Timm9  | Aldh6a1 | Cndp2   | Etf1     | Hspa2    | Nova1  | Ppm1f    | Scrn1    | Vps45  |
| H2afv   | Tmem11 | Aldh7a1 | Coro2b  | Etfdh    | Kbtbd11  | Nsfl1c | Ppp2r5a  | Sh3glb1  | Wasf3  |
| Lin7b   | Tpm4   | Anxa3   | Csde1   | Fam126b  | Kctd12   | Nt5dc3 | Ppp2r5c  | Shroom2  | Yars   |
| Lin7c   | Ttr    | Ap3m2   | Cyp46a1 | Farsa    | Kctd16   | Ola1   | Ppp5c    | Slc9a3r1 |        |
| Ndufa7  | Txn    | Arfip2  | Dars    | Fdps     | Kiaa0513 | P4hb   | Prkar1a  | Smap1    |        |
| Nme2    | Uchl3  | Ass1    | Dbnl    | Flot2    | Klc2     | Pa2g4  | Prkar2a  | Snx5     |        |
| Pdap1   | Uqcr10 | Atad3   | Dctn4   | Gabra1   | Lactb    | Pabpc1 | Prmt8    | Src      |        |
