# Supplementary material for: Decoupling of mRNA and Protein Expression in Aging Brains Reveals the Age-Dependent Adaptation of Specific Gene Subsets
Source: MDPI journal article supplement (doi:10.3390/cells12040615), 2023-02-14
Supplement: s1 [file s1]

# Supplemental Table S6

| Gene     | Peptide sequence     | m/z     | charge state | retention time |
|----------|----------------------|---------|--------------|----------------|
| Aldh2    | GYFIQPTVFGDVK        | 735,88  | 2+           | 8464,1         |
| Aldh2    | YGLAAAVFTK           | 520,79  | 2+           | 6045,2         |
| Apoa1    | VAPLGAEQLQESAR       | 670,86  | 2+           | 4884,8         |
| Apoa1    | SNPTLNEYHTR          | 444,55  | 3+           | 1328,1         |
| Apoe     | LGPLVEQGR            | 485,27  | 2+           | 2303,2         |
| Apoe     | TANLGAGAAQPLRDR      | 504,27  | 3+           | 3095,3         |
| App      | THTHIVIPYR           | 412,90  | 3+           | 2845,6         |
| App      | VESLEQEAANER         | 687,83  | 2+           | 3678,6         |
| Atp2b2   | GIIDSTHTEQR          | 419,55  | 3+           | 2145,4         |
| Atp2b2   | NVFDGIFR             | 484,25  | 2+           | 7882,2         |
| Atp5b    | IGLFGGAGVGK          | 488,29  | 2+           | 6290,2         |
| Atp5b    | VVDLLAPYAK           | 544,82  | 2+           | 7307,6         |
| Atp5o    | LGNTQGISAFSTIMSVHR   | 683,36  | 3+           | 8294,1         |
| Atp5o    | LVRPPVQVYGIEGR       | 528,31  | 3+           | 5435,7         |
| Cadm2    | DGAELPDPDR           | 542,75  | 2+           | 3507,4         |
| Cadm2    | GKPLPEPVLWTK         | 455,60  | 3+           | 5175,3         |
| Cap2     | SALFAQLNQGEAITK      | 795,93  | 2+           | 6710,7         |
| Cap2     | VEYQEDRNDLVISETLK    | 727,36  | 3+           | 5763,9         |
| Cntn1    | DGEYVVEVR            | 533,27  | 2+           | 3556,5         |
| Cntn1    | GPPGPPGGLR           | 452,75  | 2+           | 2980,0         |
| Glul     | ATSASSHLNK           | 529,27  | 2+           | 1830,1         |
| Glul     | LTGFHETSINIDFSAGVANR | 717,35  | 3+           | 5769,9         |
| Got2     | ASAELALGENNEVLK      | 779,41  | 2+           | 5847,2         |
| Got2     | VGASFLQR             | 439,25  | 2+           | 4295,1         |
| Ndufb10  | PDSWDKDVYPEPPSR      | 596,61  | 3+           | 3499,7         |
| Ndufb10  | TPAPSPQTSLPNPITYLTK  | 1013,55 | 2+           | 9237,9         |
| Ndufs2   | AVTNMTLNFGPQHAAHGVLR | 562,54  | 4+           | 4192,5         |
| Ndufs2   | LLNIQPPPR            | 524,32  | 2+           | 5219,7         |
| phtf2    | QVLVTVMK             | 459,28  | 2+           | 5875,9         |
| Prkcb    | IYIQAHIDR            | 376,88  | 3+           | 2989,5         |
| Prkcb    | LTDFNFLMVLGK         | 699,38  | 2+           | 11666,8        |
| Prrt2    | NSLQQGDVDGAQR        | 694,33  | 2+           | 1519,3         |
| Prrt2    | QEPASKPDVNR          | 612,30  | 2+           | 1324,4         |
| Psm11    | TGQAAELGGLLK         | 579,33  | 2+           | 5633,3         |
| Psm11    | YVRPFLNSISK          | 441,92  | 3+           | 4118,2         |
| Rap1gds1 | DLASAQLVQILHR        | 488,62  | 3+           | 6796,0         |
| Rap1gds1 | DQEVLLQTGR           | 579,81  | 2+           | 3447,4         |
| Scai     | HILELASILDVR         | 460,27  | 3+           | 8878,7         |
| Tomm70a  | AAAFEQLQK            | 503,27  | 2+           | 3516,8         |
| Tomm70a  | FALAAQAK             | 438,75  | 2+           | 1955,3         |
| Vim      | KVESLQEEIAFLK        | 511,96  | 3+           | 6998,8         |
| Vim      | QDVNDASLAR           | 536,26  | 2+           | 4081,6         |
