# Supplementary material for: Decoupling of mRNA and Protein Expression in Aging Brains Reveals the Age-Dependent Adaptation of Specific Gene Subsets
Source: Cells. 2023 Feb 14;12(4):615. doi: 10.3390/cells12040615 (PMC9954025; doi:10.3390/cells12040615)
Supplement: Supplementary file 1 [file cells-12-00615-s001.zip]

Archive with 8 entries (8 files):
- Khatir et al. Supplemental figures.pdf
- Khatir et al. Supplemental material legends.pdf
- Khatir et al. Supplemental Table S1.xlsx
- Khatir et al. Supplemental Table S2.xlsx
- Khatir et al. Supplemental Table S3.xlsx
- Khatir et al. Supplemental Table S4.xlsx
- Khatir et al. Supplemental Table S5.pdf
- Khatir et al. Supplemental Table S6.pdf
