# Supplementary material for: Decoupling of mRNA and Protein Expression in Aging Brains Reveals the Age-Dependent Adaptation of Specific Gene Subsets
Source: Cells. 2023 Feb 14;12(4):615. doi: 10.3390/cells12040615 (PMC9954025; doi:10.3390/cells12040615)
Supplement: Supplementary file 1 [file cells-12-00615-s001.zip › Khatir et al. Supplemental Table S1.xlsx]

## Sheet: All_TPM_values
Gene_Name	Cx-6_1	Cx-6_2	Cx-6_3	Cx-24_1	Cx-24_2	Cx-24_3	Heatmap
CYTB	29977.1	28386	30290.3	27653.1	28832.8	32964.2	NO
mt-Rnr2	14850.5	16655	13680.1	16890.6	16469.6	19067.7	NO
Calm2	10995.3	9656.6	9398.39	8986.81	8999.04	8535.45	YES
mt-Rnr1	10478.6	14778.9	11480	12409.1	11120.2	12028.4	NO
ND1	8340.8	8050.07	8157.94	7512.47	8138.36	10526	NO
ENSMUSG00000076258	7211.96	10678.2	8719.84	12858.4	9733.59	12941.7	NO
COX1	5409.55	5718.93	6836.12	4039.81	4480.25	7775.25	NO
Cpe	4940.06	4655.55	4703.9	4716.06	4580.07	4550.43	NO
Malat1	4917.75	4513.42	5345.44	4871.69	4451.43	5798.01	NO
Selenow	4539.89	4110.65	4955.08	4738.07	4118.38	4936.64	NO
Gm10800	4031.96	3832.63	6455.44	31523.4	33167.1	14490.9	YES
ND2	3824.71	3637.72	3762.07	3716.9	3676.03	4333.63	NO
ND4	3681.55	3544.34	3670.37	3601.3	3765.77	4247.86	NO
Dpysl2	3225.91	2459.54	2634.03	2819.3	2910	2748.15	NO
Calm3	3148.34	3048.57	3085.04	3298.77	3047.76	2868.44	NO
ND6	3069.99	2633.64	3089.83	3272.57	3489.95	4100.48	NO
Calm1	3029.5	2832.45	3028.13	3139.54	2650.65	2666.48	NO
Snrpn	3010.03	2716.32	2624.13	2659.95	2885.6	2608.51	NO
Snap25	2981.79	2520.14	2516.08	1997.4	2344.04	2640.98	NO
Cst3	2715.67	2721.88	2869.04	3253.87	2537.88	2943.63	NO
Gpm6a	2685.38	2554.7	2392.18	1842.21	2132.67	2174.37	YES
Prnp	2640.62	2497.79	2556.72	2668.01	2579.22	2327.24	NO
Actb	2484.71	2068.78	2147.71	2154.74	1940.9	2351.63	NO
Atp1b1	2438.32	2455.41	2179.27	1796.42	2183.55	2120.15	NO
Ywhae	2421.52	2152.97	2145.87	2287.61	2243.5	2000.39	NO
Aldoa	2399.67	2130.49	2170.94	2420.94	2162.91	1884.25	NO
Ubb	2281.33	2193.41	2114.53	2553	2339.18	1885.21	NO
Sparcl1	2248.49	2292.62	2184.54	2053.17	2429.14	2301.86	NO
Apoe	2218.44	2424.37	2713.66	2798.11	2740.1	2556.56	NO
Gnb1	2178.86	1503.42	1817.41	2255.72	2108.74	2001.8	NO
Psap	2150.06	2214.02	2047.67	1724.01	1883.78	1971.29	NO
ND5	2100.57	1974.56	2106.47	2243.51	2336.13	2579.37	NO
Vsnl1	2092.03	1837.17	1933.24	1935.61	2004.71	1717.12	NO
Slc25a4	1985.87	1942.39	1925.19	1782.74	1955.79	1845.05	NO
Ldhb	1981.13	1967.12	1883.72	1963.44	2016.97	1921.18	NO
Ppp3r1	1930.14	1104.56	1516.49	1179.72	1372.59	1569.91	NO
Ndrg4	1924.36	1196.56	1526.98	1166.34	1342.53	1533.49	NO
Rgs4	1909.61	1665.47	1566.4	1110.7	1003.66	1299.7	YES
Aldoc	1870.98	1699.74	1775.79	2176.04	1988.37	2098.58	NO
Mdh1	1757.01	1745.57	1572.19	1365.05	1546.17	1456.82	NO
Tubb4a	1728.58	1697.07	1510.55	1171.87	1301.97	1453.83	NO
Nrsn1	1637.79	1497.78	1595.43	1568.32	1477.19	1401.24	NO
Hsp90ab1	1633.8	1436.8	1381.28	1375.35	1321.7	1248.67	NO
Zwint	1618.93	1530.03	1501.01	1628.4	1575.55	1249.33	NO
Cplx2	1599.31	1230.25	1368.36	1397.71	1586.8	1808.55	NO
Itm2c	1591.35	1646.4	1530.34	1766.7	1608.95	1340.74	NO
Tmsb4x	1524.91	1459.62	1612.87	1469.58	1373.05	1382.26	NO
Gabarapl1	1515.08	1441.44	1401.46	1666.26	1596.43	1342.05	NO
Ywhah	1510.75	1413.41	1304.27	1147.56	1129.49	1162.18	YES
Nap1l5	1509.12	1613.68	1438.42	1303.51	1530.21	1371.04	NO
Fth1	1493.7	1474.08	1555.5	1351.69	1364.39	1598.83	NO
Ywhaz	1428.8	1141.61	1221.37	1193.95	1079.52	1067.01	NO
6330403K07Rik	1427.23	1320.27	1359.93	1386.33	1144.91	1109.2	NO
Itm2b	1417.16	1424.14	1384.2	1250.73	1276.38	1270.98	NO
Bex2	1406.14	1389.28	1431.1	1501.61	1248.31	1161.84	NO
Gm15564	1404.52	1403.56	1510.22	1807.91	1694.81	1919.48	NO
Vamp2	1381.5	1308.89	1296.78	1158.53	1234.29	1207.19	NO
Prkar1a	1380.85	1388.72	1243.24	1078.51	1185.35	1128.59	NO
Bsg	1366.82	1275.51	1414.11	1599.26	1467.95	1385.02	NO
Tspan7	1358.45	1331.71	1346.16	1420.31	1239.95	1196.53	NO
Rab3a	1350.81	1354.99	1275.28	1234.74	1217.9	1118.17	NO
Cox4i1	1337.4	1320.35	1438.69	1328.42	1309.79	1364.05	NO
Cox6a1	1330.36	1298.35	1405.93	1108.12	1114.05	1574.64	NO
Ctxn1	1285.45	1294.89	1348.06	1386.26	1108.66	1021.94	NO
Atp6v1g2	1254.23	1171.09	1202.65	1426.75	1254.42	1104.2	NO
Cox8a	1223.84	1113.94	1188.1	1124.49	1050.19	1383.6	NO
Kif5a	1188.99	1270.62	1095.74	906.829	1212.89	1430.49	NO
Atp6v1b2	1179.09	1093.28	1005.74	1070.98	1053.15	911.225	NO
Prkar1b	1172.54	1087.84	1142.44	1011.62	1008.32	1041.55	NO
Tagln3	1172.51	1105.45	1148.36	995.692	1003.53	965.858	NO
Ckb	1163.34	1140.05	1133.68	1028.26	1069.02	1196.75	NO
Map1b	1156.75	908.801	955.865	793.944	877.093	948.251	NO
Ndfip1	1137.6	1033.45	993.935	841.943	873.531	831.898	YES
Ncdn	1133.85	1068.86	1082.2	994.799	947.765	1025.16	NO
Mllt11	1124.13	1047.92	970.543	954.661	941.76	814.09	NO
Rab6a	1117.1	1028.48	977.419	758.938	845.232	920.976	NO
Ghitm	1106.66	1008.61	926.796	718.58	875.391	940.908	NO
Gap43	1103.85	1209.36	1113.26	1175.65	1074.38	693.346	NO
Ywhab	1096.26	1085.63	1041.5	951.953	982.279	934.676	NO
Hspa8	1086.25	1123.08	963.515	844.099	842.851	809.512	YES
Arc	1085.23	1313.95	585.633	1382.02	233.159	192.614	NO
Serinc1	1071.82	997.012	883.889	662.378	798.286	825.857	NO
Gpm6b	1064.84	1007.33	975.85	808.155	914.352	1008.77	NO
Cfl1	1053.89	1032.44	1030.13	917.055	863.754	882.9	NO
Ppp3ca	1049.06	860.178	1110.33	891.364	938.324	1071.05	NO
Camk2a	1045.89	1066.79	1159.15	963.872	893.84	1063.46	NO
Rtn1	1025.97	1063.34	1004.99	874.039	812.041	821.082	YES
Cplx1	1024.04	973.414	919.292	729.348	1064.37	1210.79	NO
Rnf187	1009.94	1012.13	983.091	1054.6	988.938	908.813	NO
Stmn3	999.401	962.938	1031.79	853.353	829.416	858.271	NO
Arl6ip5	995.924	894.295	921.613	975.667	917.718	866.931	NO
Atp1a1	995.887	1274.65	1256.49	866.606	934.066	1202.84	NO
Hprt	990.598	849.753	842.381	831.496	855.383	752.232	NO
Syt1	974.395	925.022	840.764	654.21	746.575	852.365	NO
Pld3	970.478	957.5	962.797	929.029	863.897	892.976	NO
Psmc5	967.937	905.602	934.98	1044.39	1076.91	871.11	NO
Syn1	963.608	979.28	933.74	712.414	680.108	802.895	YES
Pkm	951.021	936.144	865.156	854.849	874.857	832.148	NO
Stxbp1	949.333	912.874	856.655	761.612	777.713	822.989	NO
Gdi1	945.945	906.409	833.013	828.627	855.559	785.541	NO
Atp1a3	945.845	911.315	850.476	588.591	728.444	829.693	NO
Atp1b2	943.671	936.541	956.049	823.627	889.788	1133.57	NO
Snca	935.27	870.221	893.854	845.693	711.447	592.865	NO
Ncs1	926.347	765.094	883.48	1215.45	1082.48	941.878	NO
Stmn4	924.342	913.955	836.122	940.146	901.66	797.335	NO
Clu	916.739	956.214	952.936	801.297	859.765	848.068	NO
Jph3	912.207	844.207	824.694	1080.24	997.136	925.836	NO
Snhg11	911.862	794.09	1015.88	859.881	841.737	1275.12	NO
Snap47	906.415	905.115	839.435	785.611	790.337	737.509	NO
Fkbp1a	904.569	814.618	863.784	953.414	758.7	700.946	NO
Cx3cl1	894.371	929.843	944.371	678.579	623.165	635.593	YES
Nsf	892.754	907.261	806.495	637.713	709.458	759.235	YES
Syt11	888.576	902.979	777.529	642.814	733.87	751.275	NO
Aplp1	884.437	1721.87	1940.76	1989.7	1838.49	1580.95	NO
Pea15a	884.023	869.87	920.79	1254.96	978.958	760.788	NO
Tspan13	881.518	791.839	855.485	784.342	760.761	672.65	NO
Rtn3	871.192	881.693	805.904	642.506	703.819	748.297	NO
Ndufa4	857.554	788.246	817.113	788.516	770.602	837.523	NO
Arl6ip1	850.73	826.868	823.296	849.654	836.44	735.773	NO
Vti1b	847.443	756.999	835.766	878.674	812.134	687.951	NO
Sult4a1	840.75	798.713	789.009	763.362	806.615	771.373	NO
Slc25a5	840.198	819.764	713.796	674.908	761.879	718.924	NO
Skp1	839.562	722.101	716.341	687.624	694.346	720.542	NO
Eif5a	836.67	798.279	811.372	888.272	819.201	738.727	NO
Cd81	836.64	838.776	823.591	901.42	873.082	795.446	NO
Enc1	834.529	712.037	867.019	693.011	585.246	631.288	NO
Atp6v0d1	824.855	774.736	746.897	728.022	708.986	650.813	NO
Fam81a	822.193	656.458	741.578	795.253	746.274	771.363	NO
Nefl	817.753	756.45	702.214	567.535	748.551	851.947	NO
Hpcal4	814.307	793.692	832.429	715.949	653.665	626.573	NO
Atp6v0e2	811.749	752.984	768.44	716.348	693.093	686.664	NO
Dkk3	807.311	758.494	765.952	853.007	837.651	680.278	NO
Uqcr10	806.378	761.917	706.102	785.74	735.309	798.18	NO
Mir6236	804.433	1322.52	1699.45	879.208	962.232	1191.11	NO
Atp5b	803.647	840.77	757.038	668.735	779.907	758.074	NO
Camk2n1	793.681	566.573	1067.06	1057.06	764.989	826.875	NO
Tecr	791.837	821.772	774.68	806.838	765.749	718.213	NO
Sncb	787.88	743.125	775.547	933.328	907.138	808.147	NO
Chn1	786.644	723.55	705.531	589.289	646.819	686.168	NO
Tmem59l	785.878	750.672	736.063	690.956	661.491	676.873	NO
Hsbp1	771.146	759.591	777.184	815.243	655.359	604.257	NO
Sst	763.351	792.859	806.495	825.677	671.564	712.593	NO
Tmem30a	763.264	659.725	636.177	448.961	547.072	592.958	NO
Cnbp	761.009	708.834	675.757	660.229	723.409	651.094	NO
Chgb	755.278	683.244	731.05	548.268	627.573	652.369	NO
Pgrmc1	754.741	796.83	746.473	610.742	606.186	534.012	NO
Cox6b1	745.35	713.458	681.659	671.012	645.521	719.359	NO
Sub1	745.127	669.99	681.027	697.222	663.72	593.846	NO
Arpc2	736.901	684.941	755.67	672.515	645.037	630.425	NO
Canx	730.946	609.091	620.462	483.861	588.272	605.917	NO
Tmem59	724.798	716.315	729.06	685.323	726.469	683.262	NO
Ppme1	724.348	665.004	671.349	628.039	627.965	650.711	NO
Coa3	723.913	646.593	687.993	776.872	667.791	584.557	NO
Atp5a1	722.443	744.028	686.126	604.809	681.828	650.582	NO
Vxn	722.329	742.948	577.364	400.111	582.879	531.982	NO
Pak1	720.336	641.577	571.609	429.116	533.265	574.757	NO
Mdh2	717.201	670.836	669.053	700.688	668.245	595.387	NO
Wbp2	716.175	679.956	706.854	783.013	717.996	677.042	NO
Stx1a	712.856	678.91	689.077	748.952	640.702	612.251	NO
Rab7	711.866	665.318	617.919	614.626	703.841	645.013	NO
Scg5	709.075	625.724	669.768	683.708	682.263	633.316	NO
Dynlrb1	708.792	694.349	742.735	693.806	595.869	603.078	NO
Ctsb	708.207	672.655	646.224	614.959	664.623	665.866	NO
AI593442	704.366	519.866	526.661	401.861	461.438	689.153	NO
Cdc42	702.849	642	622.027	567.26	585.502	577.737	NO
Plk2	700.251	672.982	555.807	586.78	466.456	468.565	NO
Snx3	698.404	673.478	730.921	678.087	612.406	603.904	NO
Map1lc3a	697.886	703.885	737.864	663.252	593.377	591.477	NO
Atxn10	697.473	706.716	628.61	551.147	586.091	554.451	NO
Tmbim6	688.751	699.039	670.828	796.283	743.03	658.27	NO
Aplp2	685.592	650.532	601.528	423.687	517.922	595.411	NO
Npy	684.041	687.087	829.487	684.389	588.453	850.239	NO
Smim10l1	683.361	484.41	544.505	454.443	518.962	600.851	NO
Atp6v0b	682.854	626.554	747.937	797.428	671.446	599.591	NO
Syt4	680.123	533.103	547.117	488.863	479.97	451.917	NO
Camkv	678.47	677.115	621.765	681.422	610.774	483.042	NO
Plp1	674.36	844.258	525.043	302.907	753.478	965.998	NO
Ap1s1	672.456	612.818	687.441	723.53	665.074	639.68	NO
Apbb1	671.14	635.938	603.272	641.648	626.183	558.45	NO
Ndrg2	670.327	642.74	657.814	747.615	730.785	744.044	NO
Syngr3	666.299	693.309	660.092	691.359	616.524	480.451	NO
Syngr1	664.666	369.522	498.442	573.002	592.252	525.667	NO
Ndufa8	663.713	632.867	717.591	692.784	638.635	593.347	NO
Rtl8c	663.36	599.928	658.641	679.33	565.884	548.587	NO
Sdha	662.043	662.286	580.048	585.87	628.405	595.236	NO
Wasf1	658.115	616.734	560.303	492.92	499.91	523.761	NO
Tspyl1	657.632	550.274	580.164	550.148	614.311	581.328	NO
Rpl4	652.929	665.673	615.37	657.943	691.976	611.175	NO
Ndufa1	652.715	642.898	509.925	622.964	602.216	682.233	NO
Gstm5	652.544	599.771	669.739	691.925	656.613	716.702	NO
Actr2	650.873	474.04	513.704	438.47	486.353	544.249	NO
Norad	650.45	584.541	529.989	436.444	476.369	554.384	NO
Otub1	648.907	515.045	569.828	691.086	622.022	581.421	NO
Atp6ap2	648.519	634.312	563.472	399.349	491.616	484.385	NO
Ndufc2	648.469	641.247	650.631	568.406	546.911	585.736	NO
Arf1	647.428	666.138	608.312	581.473	579.83	535.148	NO
mt-Tp	644.512	694.563	541.124	1100.58	930.853	1278.62	NO
Timm8b	643.715	650.43	653.595	606.361	566.113	593.73	NO
Gm10801	642.256	656.702	1054.69	5187.16	5168.45	2395.62	YES
Atp6ap1	642.206	605.186	578.549	516.006	548.157	524.407	NO
Vdac1	634.7	640.518	586.283	523.454	564.627	560.679	NO
Got1	630.174	623.649	584.691	470.692	524.068	538.439	NO
Ywhag	625.53	617.209	585.64	483.872	484.758	517.907	NO
Pja2	625.52	577.07	533.355	423.674	491.747	530.676	NO
Rnf14	624.386	595.402	522.804	458.248	510.378	497.72	NO
Pfn2	623.702	931.025	951.532	859.7	948.454	911.499	NO
Pink1	622.243	716.936	682.603	634.579	788.688	765.664	NO
Kif5c	620.05	549.479	536.963	443.666	542.305	630.027	NO
Ndufb10	619.222	607.514	647.97	633.791	612.519	556.245	NO
Ngef	618.244	592.856	533.642	470.757	496.371	531.52	NO
Laptm4a	613.426	596.567	633.48	540.603	660.218	630.085	NO
Arpp19	611.648	522.537	546.594	432.509	438.848	505.85	NO
Atp5c1	609.585	552.853	572.984	548.569	582.028	550.393	NO
Cyfip2	606.381	624.13	594.331	507.398	509.433	570.9	NO
Pcsk1n	599.98	637.258	659.672	729.195	594.063	642.362	NO
Sdhb	598.183	556.594	565.348	621.653	597.382	515.679	NO
Rab6b	596.974	653.659	603.433	484.612	531.5	621.806	NO
Tubb2a	595.982	689.753	607.273	549.899	485.276	416.784	NO
Bex3	595.934	577.717	625.04	646.225	552.801	497.577	NO
mt-Tq	595.431	1043.78	656.101	1289.95	1095.3	2083.95	NO
Junb	594.822	745.397	367.538	1152.09	251.922	159.566	NO
Ptn	594.231	540.186	585.42	452.095	479.229	571.467	NO
Hpca	589.814	547.903	613.978	817.872	590.555	550.957	NO
Glrb	588.196	543.974	468.925	320.902	425.873	509.069	NO
Grina	580.843	570.032	570.494	508.587	521.718	554.262	NO
Hspa5	580.258	612.659	652.974	426.5	400.419	384.752	YES
Gng3	579.114	518.56	554.282	468.817	429	453.815	NO
Ndufb9	579.009	575.242	596.764	583.449	589.876	616.785	NO
Ptgds	575.838	1024.39	1698.68	525.856	1436.27	875.096	NO
Dctn3	575.833	518.509	570.745	535.709	469.431	461.73	NO
Tuba1a	575.56	544.685	514.821	453.264	436.136	435.191	NO
Egr1	569.679	709.533	398.756	530.977	218.224	159.625	NO
Gde1	568.84	544.555	519.346	461.209	450.121	448.406	NO
Mlf2	568.298	533.752	549.598	564.445	549.867	504.438	NO
Hint1	567.996	559.527	612.554	513.707	503.681	522.761	NO
Kifc2	567.475	515.61	545.19	651.238	678.209	665.704	NO
Gas7	566.047	424.032	447.773	547.153	507.303	457.712	NO
Phyhip	561.478	508.493	536.914	516.723	455.137	476.365	NO
Ppp2r1a	560.118	587.363	539.868	464.718	465.326	487.382	NO
Selenok	559.924	512.942	563.058	539.84	547.706	513.469	NO
Reep5	559.539	599.493	542.658	452.943	516.917	508.963	NO
Cox7a2	557.812	542.585	503.951	497.039	485.889	548.76	NO
Atp5k	556.393	657.774	326.59	674.205	627.65	658.495	NO
Syt5	554.267	551.441	516.351	565.287	533.706	428.317	NO
Mbp	553.126	720.828	469.709	253.707	641.566	887.196	NO
Ap2m1	550.989	493.102	460.959	531.605	520.073	434.97	NO
Vapa	547.904	474.143	496.66	430.3	436.168	434.57	NO
Mtpn	546.233	498.971	484.773	420.395	442.424	470.45	NO
Psmc1	544.768	505.561	489.826	500.776	544.626	471.359	NO
Ndufa2	543.117	590.459	499.732	576.214	515.169	561.727	NO
Rasgrp1	539.758	521.239	451.308	301.976	380.524	436.864	NO
Fbxl16	537.374	609.209	568.954	508.956	508.086	554.727	NO
Lmo4	536.708	439.741	522.704	619.159	534.769	412.625	NO
Trim32	536.229	547.744	465.68	355.347	392.596	425.597	NO
Tspyl4	535.754	359.852	388.312	299.888	371.385	415.144	NO
Impact	534.898	469.661	470.917	486.41	460.267	381.759	NO
Olfm1	532.405	546.464	614.004	549.353	470.567	495.571	NO
Uqcrfs1	531.689	514.087	514.47	439.179	477.505	457.851	NO
Tubb3	528.169	533.085	494.142	431.96	440.333	440.882	NO
Tspan3	524.188	493.802	487.771	450.883	480.05	459.725	NO
Mrfap1	521.1	498.887	483.011	435.689	456.132	465.332	NO
Ndufv2	520.031	468.872	475.477	504.403	523.078	462.819	NO
Emc4	519.723	492.436	493.836	497.355	456.5	447.88	NO
Pja1	519.063	502.548	467.194	455.58	449.477	380.663	NO
Nrgn	515.682	483.091	625.207	521.798	424.839	573.964	NO
Ndufa13	512.609	541.595	511.769	574.047	511.287	502.149	NO
Atp6v1c1	512.445	482.147	445.389	398.23	430.16	406.595	NO
Napa	511.973	477.312	460.763	460.557	451.339	455.058	NO
Cisd1	509.818	501.256	517.468	524.593	447.387	435.174	NO
Tppp	508.627	490.288	426.345	370.069	395.374	424.814	NO
Uqcrc1	506.697	465.236	436.418	521.044	523.879	464.604	NO
Glul	505.052	565.222	549.888	534.966	538.545	568.619	NO
Maged1	502.746	534.276	448.157	418.211	427.896	405.837	NO
Ube2b	500.218	475.48	450.875	398.704	405.212	385.222	NO
Slc22a17	498.598	854.415	783.849	804.644	756.352	692.86	NO
Ndufb6	498.59	503.487	522.24	474.307	435.64	449.894	NO
Rab11a	494.647	454.063	431.876	341.542	366.196	382.982	NO
Tmem250-ps	494.302	368.23	433.753	588.938	544.127	533.962	NO
Eno1	493.076	508.22	456.25	450.16	439.284	417.055	NO
Cap2	492.382	444.634	460.957	381.646	396.527	390.206	NO
Fam171b	490.946	518.807	417.294	328.196	398.406	413.996	NO
Uqcr11	490.489	487.882	439.729	540.016	453.536	487.826	NO
Scn2b	487.096	273.492	349.042	535.496	490.63	407.499	NO
Clstn3	486.14	422.411	416.1	326.899	359.494	393.307	NO
Stmn1	485.849	513.575	471.135	331.363	372.277	383.749	NO
Nsg1	483.393	492.932	479.486	455.431	445.933	418.719	NO
Ftl1	483.13	532.167	528.92	534.343	545.624	544.496	NO
Crip2	482.948	523.789	526.585	646.614	495.842	402.432	NO
Efhd2	482.632	1119.98	1181.87	1276.17	1430.95	1130.77	NO
Omg	481.387	422.612	375.187	307.407	379.502	403.477	NO
Tmem9b	481.324	474.467	460.477	433.37	424.541	408.356	NO
Klc1	479.325	441.62	416.668	423.058	441.053	406.098	NO
Abhd12	478.611	471.987	451.404	429.995	446.72	445.803	NO
Zcchc18	476.02	491.76	454.203	442.801	433.099	365.305	NO
Tmem50a	474.597	484.421	492.762	464.682	433.571	398.034	NO
Gnai1	471.94	524.867	466.259	387.014	436.822	425.124	NO
Clstn1	471.396	830.105	966.027	815.937	843.625	925.859	NO
Lamp1	469.076	502.277	462.745	415.026	459.141	481.589	NO
Sqstm1	467.508	452.247	447.16	425.415	415.726	406.792	NO
Ppp1ca	467.03	447.631	462.306	522.746	486.815	401.193	NO
Atpif1	465.942	448.347	445.187	447.104	432.423	446.65	NO
Ndufa5	464.45	485.989	414.172	452.039	467.372	468.589	NO
Dusp3	463.137	360.704	385.684	427.041	446.346	466.864	NO
Saraf	460.709	461.31	451.303	475.087	442.871	408.669	NO
Cck	455.442	433.727	528.514	498.017	341.026	412.212	NO
Car2	455.229	492.786	485.942	347.602	490.663	620.876	NO
Spop	454.613	431.422	410.543	366.529	445.586	403.591	NO
Polr2m	454.573	430.388	424.338	463.571	486.718	425.11	NO
Fez1	451.949	429.837	416.594	435.113	453.407	398.161	NO
Cbln2	450.929	316.253	389.735	236.704	243.289	309.929	NO
Sucla2	449.776	402.27	370.523	330.144	386.83	362.629	NO
Pdia3	449.747	383.328	455.555	332.917	347.996	336.473	NO
Mgst3	449.225	417.295	403.066	413.267	396.864	397.19	NO
Epdr1	446.834	374.831	378.165	294.167	356.031	377.598	NO
Bc1	443.912	1176.94	236.938	1457.25	1080.31	1825.34	NO
Rph3a	443.536	419.021	405.817	320.035	371.574	434.619	NO
Rab1b	442.732	393.991	435.491	542.803	495.026	435.239	NO
Uchl1	438.495	455.73	496.58	455.645	403.584	404.724	NO
Ndufs2	436.011	439.077	396.469	401.041	446.78	410.795	NO
Thy1	435.42	404.77	422.571	403.144	402.005	390.328	NO
Tubb5	435.302	407.388	423.378	390.055	367.179	351.781	NO
Prkcg	433.181	447.721	412.995	345.429	336.258	321.268	NO
Dazap2	432.8	409.688	404.176	458.054	465.241	433.812	NO
Tpi1	432.731	384.912	412.549	426.768	415.727	387.225	NO
Nell2	431.563	505.375	477.302	400.229	393.744	402.494	NO
H1f0	429.917	398.235	407.505	432.364	489.705	441.797	NO
Cend1	429.221	423.693	385.842	366.677	412.094	397.132	NO
Ncald	428.803	403.544	411.373	400.368	389.924	341.741	NO
Sdhd	424.907	360.296	391.002	344.625	368.764	366.491	NO
Acot13	424.413	417.033	460.551	459.101	433.327	414.88	NO
Acot7	423.902	405.567	429.722	422.409	387.416	343.093	NO
Ptms	423.045	538.213	608.083	603.774	549.499	543.919	NO
Rsrp1	422.73	459.681	466.084	356.218	372.748	534.374	NO
Slc1a2	419.536	366.104	421.63	417.711	428.639	528.929	NO
Yaf2	419.047	490.727	525.276	439.96	456.834	453.2	NO
Syt13	418.37	393.191	373.664	315.042	339.139	353.412	NO
Fam131a	417.428	416.194	419.642	392.962	376.426	347.818	NO
Tmx2	417.021	372.085	345.326	355.28	383.849	352.119	NO
Capza2	416.007	385.765	366.84	312.107	354.169	350.436	NO
mt-Tl1	415.578	476.974	370.084	549.52	620.371	638.217	NO
mt-Tm	415.578	521.421	498.933	764.073	640.84	703.439	NO
H3f3b	415.082	409.628	415.508	463.559	480.673	427.995	NO
Necap1	413.156	401.191	363.853	365.924	385.419	327.486	NO
Slc1a3	412.918	421.497	421.508	405.058	380.118	431.576	NO
Arhgdia	410.592	394.527	430.902	461.355	444.169	395.64	NO
Meg3	409.899	465.567	486.426	596.408	501.845	597.097	NO
Mapk1	409.807	404.6	381.35	288.477	299.431	333.938	NO
Dynlt3	409.315	382.949	358.664	302.618	354.879	339.505	NO
Nptxr	408	566.495	624.727	562.088	437.788	501.342	NO
Cyp46a1	407.739	409.164	418.973	446.455	374.926	359.77	NO
Id2	406.962	158.293	259.557	267.491	309.863	343.447	NO
Atp6v1e1	406.45	361.624	374.445	362.712	361.485	348.219	NO
Nsmf	402.915	410.739	431.648	432.142	446.899	427.795	NO
Prdx5	402.808	390.263	416.7	405.668	368.81	378.228	NO
Enpp5	401.12	385.447	333.909	261.86	304.513	342.349	NO
Atp6v1a	400.476	409.803	384.798	286.514	325.089	349.167	NO
Atp5h	399.821	399.721	398.9	358.909	371.73	389.865	NO
Brk1	399.741	387.353	403.606	328.665	330.487	334.286	NO
Scamp5	398.874	321.386	349.128	343.261	355.266	351.38	NO
Zfp365	398.767	538.897	563.273	505.115	549.235	582.584	NO
Sv2b	397.817	318.17	317.857	239.349	263.09	284.684	NO
Atp6v1d	396.786	356.885	374.809	330.441	336.247	330.797	NO
Eif1	395.175	412.596	401.563	360.875	334.546	348.945	NO
Idh3a	393.47	371.184	335.304	308.919	344.016	338.731	NO
Atp6v1f	393.436	398.628	413.125	390.696	340.332	338.352	NO
Trf	390.713	540.696	321.484	256.624	533.343	666.576	NO
Cops6	390.426	341.361	366.632	392.155	396.548	336.22	NO
Hnrnpk	389.606	387.845	332.73	289.134	332.996	327.365	NO
Nars	389.414	352.954	321.488	297.712	335.137	342.702	NO
Gabra1	389.107	349.409	296.153	186.242	268.907	319.681	NO
Rrp1	388.859	367.802	367.56	347.928	353.685	332.696	NO
Tsc22d1	388.799	380.341	361.072	408.668	341.542	302.734	NO
Dbpht2	388.401	273.248	320.814	304.968	270.096	259.816	NO
Ptges3	388.073	301.541	325.853	334.09	321.55	315.434	NO
Map2k1	387.045	368.534	367.227	320.954	296.509	295.341	NO
Aco2	386.94	392.232	339.953	341.884	365.832	365.095	NO
Sh3bgrl3	385.16	349.579	395.212	400.025	319.401	334.694	NO
Hacd3	385.119	394.758	378.822	324.819	335.669	330.929	NO
Ubqln1	384.212	388.976	341.72	273.693	321.597	347.086	NO
Olfm2	383.525	340.352	345.636	300.046	278.062	298.372	NO
Kif1a	382.924	399.251	381.9	321.259	345.417	400.839	NO
D8Ertd738e	382.704	372.567	393.654	430.408	357.305	349.854	NO
Napb	382.02	367.936	336.357	285.745	313.511	332.767	NO
Ddx5	381.272	350.76	337.297	238.538	273.93	333.536	NO
Rplp1	379.993	392.135	364.142	445.203	381.345	414.626	NO
Zfp706	379.633	372.862	365.513	344.501	342.064	317.459	NO
Psmd2	378.247	361.319	318.778	301.369	330.993	306.569	NO
Tsnax	377.605	341.969	338.403	347.01	309.485	332.342	NO
Spryd3	377.307	357.442	352.519	413.072	419.574	335.855	NO
Rraga	376.443	359.516	340.766	321.051	318.156	293.486	NO
Nudc	375.412	350.951	359.363	375.822	419.833	338.337	NO
Resp18	373.844	326.674	373.307	381.952	319.326	313.079	NO
Sec62	373.161	365.73	329.361	269.552	331.124	315.709	NO
Neurod6	372.965	333.678	351.72	319.707	290.642	232.049	NO
Cyc1	372.483	358.042	363.902	406.659	402.702	346.934	NO
Eif4a2	371.4	357.949	313.154	265.919	319.455	292.792	NO
Rab2a	370.465	733.706	1056.61	982.398	1082.88	794.185	NO
Golga7b	368.846	327.264	351.695	396.151	358.441	345.018	NO
mt-Tt	368.776	416.126	319.536	641.422	472.814	527.47	NO
Arf5	368.368	434.624	428.976	477.371	440.095	399.318	NO
Gstm1	367.102	397.69	417.987	434.282	401.672	436.263	NO
Atp5o	366.744	352.83	368.628	362.2	352.575	341.977	NO
Prxl2b	366.725	361.7	401.103	443.95	428.198	375.476	NO
Enpp2	365.985	319.566	312.341	222.992	277.909	359.605	NO
Gria1	365.675	388.77	340.123	323.693	326.035	304.105	NO
Stip1	364.804	335.659	328.259	316.941	313.287	276.197	NO
Hmgcs1	363.875	386.445	323.145	279.566	282.098	295.416	NO
Ppp1r1a	362.582	343.137	414.349	378.869	338.997	349.127	NO
Septin7	362.469	323.474	286.628	238.926	296.951	279.598	NO
Nsg2	361.721	356.845	355.744	368.243	323.872	285.606	NO
Qdpr	361.697	399.172	341.34	258.085	387.566	455.104	NO
Celf4	360.591	364.745	369.576	416.814	376.479	309.034	NO
Rtn4	358.613	410.871	385.533	313.777	368.092	388.606	NO
Tceal9	357.396	322.331	374.723	336.857	309.831	288.059	NO
Igfbp6	357.141	294.231	389.599	429.022	356.89	343.356	NO
Ociad2	356.798	326.747	330.929	269.563	284.807	322.035	NO
Rapgef4	355.889	350.535	340.084	234.609	360.214	497.748	NO
Nedd8	355.298	320.267	356.106	349.37	295.093	292.586	NO
Slc25a3	355.15	354.489	329.435	313.328	315.656	306.01	NO
Atp6v0a1	353.381	365.807	328.721	247.93	269.719	308.61	NO
Nr4a1	353.196	388.653	195.206	546.906	52.5054	68.6193	NO
Sar1b	353.113	321.88	335.606	319.791	317.89	314.659	NO
Calb1	352.928	299.721	322.326	319.764	248.431	233.113	NO
Tbcb	352.751	300.397	331.103	394.761	345.164	318.216	NO
Arpc5	350.625	356.909	337.873	334.87	313.07	242.15	NO
Pcmt1	350.444	306.505	304.186	294.094	306.484	291.563	NO
Sae1	350.318	331.305	320.8	326.033	334.686	289.174	NO
Cdc42se2	349.553	368.681	288.277	281.888	290.716	294.149	NO
Scamp1	348.675	324.641	282.222	225.202	260.56	288.136	NO
Ldha	348.407	354.049	337.113	323.629	281.334	260.604	NO
Lzts1	347.916	306.284	302.012	352.86	315.01	286.367	NO
BC031181	347.236	334.85	329.599	327.802	300.766	281.806	NO
Cox7b	346.833	335.959	310.075	316.373	323.28	345.368	NO
Capzb	346.477	356.658	344.336	343.323	347.156	307.815	NO
Atp2b1	346.155	314.112	326.996	254.366	281.825	317.212	NO
Pls3	345.554	339.358	303.226	258.776	300.994	245.604	NO
Ncam1	345.447	330.042	304.246	275.495	271.521	262.747	NO
Rps11	344.866	346.135	351.477	332.302	325.153	322.711	NO
Mmd	344.734	317.752	356.786	292.94	309.804	313.931	NO
Car11	344.667	318.468	358.273	400.419	377.843	353.28	NO
Rnf227	343.939	325.68	314.683	306.835	338.389	321.861	NO
Ypel3	343.146	485.773	511.308	547.763	457.836	445.835	NO
Ndufa12	342.618	312.992	323.913	363.107	336.154	311.633	NO
Kifap3	341.628	317.29	295.771	223.16	262.65	290.687	NO
Bcap31	340.948	297.835	314.01	293.402	314.555	296.244	NO
Spcs3	340.378	314.248	318.091	262.956	275.781	288.466	NO
Ttc9b	339.41	349.714	305.027	293.261	276.756	281.609	NO
Eloc	339.119	307.606	294.412	264.212	290.254	298.072	NO
Pdha1	338.713	338.195	296.125	239.649	287.242	295.107	NO
Ndufb11	338.645	351.982	353.553	367.127	336.769	335.758	NO
Bmerb1	338.504	349.105	315.83	313.966	349.09	299.228	NO
Flywch1	337.786	357.122	323.453	325.062	332.795	330.556	NO
Usp22	337.49	302.701	265.83	227.628	240.836	266.569	NO
Asns	337.324	338.686	286.559	246.343	256.266	256.183	NO
Ppia	337.078	319.602	326.458	268.209	279.064	297.095	NO
Chchd10	336.78	341.477	361.819	320.721	297.161	322.73	NO
mt-Te	336.733	420.405	425.652	428.834	417.662	617.535	NO
Pfkm	336.183	317.786	302.809	273.157	307.854	330.589	NO
App	335.928	341.83	324.511	267.264	284.788	309.789	NO
Sv2a	334.811	376.687	318.988	244.715	287.064	317.829	NO
Lars2	332.822	364.269	356.5	457.085	411.69	444.908	NO
Psmd7	332.449	307.913	315.039	271.761	298.168	284.811	NO
Os9	331.482	321.619	313.704	344.887	338.143	304.372	NO
Ctsd	331.051	326.383	325.035	326.335	331.856	336.51	NO
Eno2	330.43	68.1674	144.122	166.383	181.322	228.666	NO
Akr1a1	330.291	327.185	328.381	324.375	313.266	289.963	NO
Eef1a1	329.743	345.414	315.972	314.247	354.296	314.965	NO
Hsp90b1	329.083	323.266	346.121	267.658	292.01	277.124	NO
Ndufa3	328.817	330.673	228.85	362.826	308.459	341.639	NO
Uqcc2	328.508	314.853	311.308	363.339	325.911	342.86	NO
Eif4g2	328.022	305.135	292.502	190.254	233.709	281.606	NO
Dusp1	326.223	316.297	157.231	368.144	84.4479	103.731	NO
Lrpap1	325.727	329.27	310.776	351.429	296.553	252.72	NO
Lamp5	325.372	308.833	333.238	302.534	307.483	323.996	NO
4833439L19Rik	324.299	327.027	313.397	284.797	277.662	291.12	NO
Shisa4	322.675	295.508	302.548	297.189	258.565	270.712	NO
Atp1a2	320.967	251.142	328.22	290.894	387.717	404.238	NO
Zfr	320.173	312.013	334.65	299.933	292.154	313.848	NO
Rbbp7	319.018	306.272	307.03	292.154	285.215	248.779	NO
Cops7a	318.153	306.446	295.882	272.562	275.494	266.866	NO
B2m	317.35	301.188	357.399	347.477	332.415	388.309	NO
Mal2	316.543	287.248	299.48	234.32	270.028	278.152	NO
Uqcrc2	316.391	325.941	282.53	262.766	296.926	267.585	NO
Kcnab2	314.579	296.619	283.905	286.016	327.368	353.336	NO
ENSMUSG00000039530	313.995	292.422	286.416	268.469	260.853	240.945	NO
Fscn1	313.151	325.882	323.283	279.279	274.44	270.978	NO
Eef2	312.672	324.342	307.924	322.972	341.103	333.324	NO
Cacng3	312.183	275.503	311.59	307.775	262.57	247.596	NO
Atp5j	312.063	289.657	303.19	276.628	284.792	302.853	NO
Peg13	312.025	317.007	275.707	217.094	251.417	295.558	NO
Plekhb2	311.523	322.738	284.453	283.837	294.495	282.932	NO
Scg2	311.041	374.1	298.622	272.421	273.741	252.445	NO
Cxcl14	310.799	315.977	334.171	386.319	368.396	381.421	NO
Prps1	310.276	315.322	265.852	250.45	253.767	226.817	NO
Bzw1	308.599	293.323	246.562	193.67	236.109	250.906	NO
Usp5	308.305	277.471	259.05	259.485	252.743	244.028	NO
Ndufv1	307.273	302.524	285.988	316.683	323.136	280.017	NO
Ensa	307.178	252.228	282.258	296.095	279.308	254.573	NO
Gucy1b1	306.769	296.568	270.586	215.283	236.656	229.797	NO
Srp14	306.253	297.641	317.526	309.219	279.083	267.473	NO
Fbxo2	305.259	286.575	335.193	356.541	377.552	357.566	NO
Ppp2r2c	305.227	331.99	479.141	441.785	396.353	385.423	NO
Nmt2	305.096	225.954	255.172	240.425	237.12	248.836	NO
Atp6v1g1	305.068	291.159	286.539	285.115	298.779	279.543	NO
Scg3	303.756	294.177	300.704	274.806	291.097	288.456	NO
Hsp90aa1	303.401	268.783	261.416	240.871	254.659	252.295	NO
Mef2c	303.308	276.014	268.706	247.487	253.993	252.667	NO
Ndrg3	302.887	318.112	258.106	192.646	234.283	269.046	NO
Rpl32	302.709	335.924	329.45	293.852	310.339	312.284	NO
Flot2	302.707	304.998	312.146	331.515	332.915	298.776	NO
Uqcrq	301.454	298.772	281.794	334.685	286.612	301.673	NO
Cct8	301.186	303.455	260.943	215.597	253.152	234.612	NO
Pfdn1	301.182	283.936	288.891	309.27	287.336	270.265	NO
Sdcbp	300.832	277.841	259.669	241.249	261.78	244.781	NO
Spock1	300.685	268.024	246.674	212.238	231.772	281.618	NO
Gria2	300.012	298.855	257.38	182.645	208.996	244.606	YES
Sh3gl2	299.879	272.049	269.868	218.814	224.221	231.237	NO
Slc39a10	299.796	246.895	291.558	208.522	226.234	244.867	NO
Guk1	299.315	289.351	315.888	326.981	296.597	294.555	NO
Ncan	298.998	247.785	282.182	275.946	260.044	265.969	NO
Psmd12	298.901	291.369	264.875	245.121	277.416	236.213	NO
Ranbp1	298.859	270.589	270.118	284.807	274.459	247.908	NO
Dstn	298.68	298.762	283.058	243.993	257.979	250.068	NO
Ndufs8	298.141	278.922	292.081	292.956	278.438	258.239	NO
Cacybp	297.243	285.032	272.782	241.912	254.921	220.773	NO
Arf3	296.952	472.689	956.735	981.191	781.73	509.828	NO
1110004F10Rik	296.002	273.338	258.068	266.479	283.071	261.268	NO
Rogdi	295.853	296.087	288.723	310.009	274.87	250.691	NO
Ogdh	295.21	314.043	264.52	214.522	242.69	273.074	NO
Mcrip1	294.399	277.282	294.299	302.797	268.295	275.318	NO
Prkacb	294.292	284.322	258.544	208.468	224.278	241.459	NO
Sgta	294.265	276.213	271.163	285.79	284.549	259.45	NO
Tcf25	293.526	279.512	280.253	275.052	277.865	297.063	NO
Scd2	293.284	116.327	178.622	187.174	224.137	283.584	NO
Rtcb	292.949	282.732	265.233	266.942	293.39	240.567	NO
Arl1	292.893	270.943	260.078	266.162	266.374	256.909	NO
Chmp2a	292.614	285.276	302.009	342.151	294.677	247.062	NO
Pcsk2	291.802	240.859	245.631	212.705	210.895	250.241	NO
Actr1b	291.675	283.426	279.528	259.618	267.807	284.669	NO
Slc6a1	291.522	307.638	294.147	214.456	252.019	326.879	NO
Abcf2	291.356	272.314	260.309	245.715	254.286	254.322	NO
Eri3	290.868	278.326	284.609	313.52	282.834	262.912	NO
Atp6v0c	290.717	294.086	285.043	279.529	245.571	237.984	NO
Cdipt	290.651	274.168	272.941	266.502	246.725	247.232	NO
Gnaq	290.522	245.871	272.896	250.291	265.731	276.835	NO
Cyb5b	289.8	286.273	253.19	232.26	261.533	280.539	NO
Ndufb8	289.437	275.542	285.918	309.558	294.287	275.078	NO
Psma6	289.318	274.944	286.131	267.665	250.118	238.719	NO
Lrrc4c	288.885	257.96	245.793	255.651	234.708	225.85	NO
Psmb2	288.808	284.774	285.755	265.265	253.884	254.699	NO
Cfdp1	288.448	275.223	308.774	261.75	263.502	245.035	NO
Syn2	287.564	367.554	432.763	394.591	318.017	317.235	NO
Ttc3	287.408	256.254	264.738	259.863	254.874	262.962	NO
Cntn1	287.343	267.006	234.724	167.558	200.75	221.22	NO
Mapre3	287.329	276.034	258.832	255.578	260.407	251.545	NO
Lgmn	287.325	293.164	277.269	283.362	295.845	289.245	NO
Tusc2	287.317	275.922	270.855	274.437	274.34	245.666	NO
Psmb6	286.436	283.467	287.806	354.702	306.834	252.35	NO
Dusp14	286.116	276.833	277.834	304.987	198.33	204.699	NO
Psmc3	285.979	293.744	275.579	290.056	288.13	246.925	NO
Vmp1	285.813	269.471	240.821	203.643	229.503	225.962	NO
Cct5	285.684	272.745	266.739	246.087	262.063	223.391	NO
Uqcrh	285.227	297.644	292.83	249.266	266.94	296.997	NO
Trim35	285.164	296.718	247.034	242.847	257.433	256.416	NO
Paip2	285.157	261.624	267.027	242.332	260.962	248.909	NO
Rab10	285.139	402.216	366.938	291.224	336.153	349.328	NO
Cdk5r1	284.819	335.458	315.458	254.671	237.776	279.136	NO
Hsph1	283.863	282.691	251.781	203.519	211.664	200.54	NO
Trim37	283.772	254.336	242.963	188.352	221.515	276.942	NO
St3gal5	283.262	337.457	291.64	302.068	318.263	299.286	NO
Dnm1l	282.248	259.18	230.528	185.618	219.482	243.449	NO
Edf1	281.584	276.529	300.692	293.146	264.84	248.98	NO
Tmem38a	280.967	275.587	261.724	279.514	268.414	227.381	NO
Psmc4	280.755	275.423	267.041	280.328	272.368	238.151	NO
Lrp11	280.629	281.445	254.383	176.3	199.941	225.048	NO
Prkcb	280.6	507.203	562.365	395.059	479.601	567.269	NO
Atp5g3	280.308	281.327	299.416	254.273	256.1	260.287	NO
Cbarp	280.082	318.625	282.867	313.477	279.303	237.978	NO
Slc48a1	279.455	286.341	276.875	270.776	281.045	290.305	NO
Baalc	279.256	303.841	285.077	218.278	231.757	291.408	NO
Nap1l2	278.727	261.556	244.145	193.3	227.353	246.813	NO
Hexb	278.71	274.7	254.224	303.219	284.105	295.259	NO
Nckap1	278.234	246.198	261.089	208.321	214.827	230.298	NO
Atcay	277.704	259.999	245.076	246.209	249.553	224.318	NO
Sgtb	276.966	272.87	221.784	191.035	205.417	240.166	NO
Rabac1	276.911	285.093	273.866	287.263	279.573	248.201	NO
Ndufa10	276.832	260.978	249.529	254.542	230.854	236.97	NO
Arpc4	276.732	243.69	262.305	289.727	260.367	252.778	NO
Snn	276.186	253.957	255.993	210.934	236.413	283.192	NO
S100a1	276.163	289.043	315.927	315.034	284.497	311.017	NO
Arl8b	275.972	248.439	243.868	196.982	217.657	238.331	NO
Park7	275.599	264.875	281.693	285.282	278.027	250.923	NO
Klhdc3	275.546	271.532	258.19	270.837	277.384	241.832	NO
Prepl	275.279	265.81	222.931	159.818	196.131	228.882	NO
Ndufa11	273.488	285.071	273.587	268.923	253.331	262.08	NO
Cdk16	273.2	263.863	272.568	251.09	281.067	327.081	NO
Mif	272.014	280.125	281.592	286.533	229.439	249.494	NO
Higd2a	271.455	243.758	254.512	245.891	216.765	226.608	NO
Hspd1	270.95	287.253	233.122	191.061	201.921	202.128	NO
Prr13	269.852	251.267	300.294	383.678	320.337	262.839	NO
Bhlhe40	269.774	214.022	218.801	209.307	152.52	165.01	NO
Mt3	269.42	257.504	247.359	257.748	223.292	285.573	NO
Ak5	268.964	283.084	295.662	299.342	246.648	235.042	NO
Ckmt1	268.591	263.441	249.56	204.589	222.766	210.68	NO
Tmem130	268.454	304.963	254.633	222.905	223.703	199.134	NO
mt-Tf	268.348	342.174	246.807	523.204	407.628	465.44	NO
Eif4h	268.208	274.433	251.93	262.928	260.651	235.964	NO
Emc10	268.02	321.35	320.83	355.678	319.577	289.197	NO
Srsf5	267.973	236.103	266.798	215.022	236.263	265.964	NO
Abhd8	267.802	254.457	263.879	280.636	263.675	264.581	NO
Tmsb10	267.449	298.909	250.66	236.77	246.54	227.706	NO
Tm2d1	267.416	235.188	247.516	246.746	240.149	227.953	NO
Tm9sf2	267.352	254.126	236.668	181.135	206.926	217.123	NO
Ctss	267.324	250.367	282.265	368.079	288.271	305.205	NO
Rasgrf1	267.238	284.499	229.703	193.932	201.019	234.511	NO
Psme3	267.226	312.336	298.524	309.055	335.095	308.965	NO
Polr2g	266.761	260.569	275.987	255.741	240.189	239.369	NO
Pkia	266.337	241.227	236.473	163.395	198.085	191.304	NO
Sprn	266.015	245.105	233.722	204.352	199.614	192.417	NO
Uqcrb	265.882	237.298	225.113	206.421	212.33	251.761	NO
Tmed9	265.337	260.293	255.614	244.261	237.006	229.3	NO
Synj1	265.173	273.794	238.371	164.59	191.882	233.717	NO
Rab1a	264.956	240.241	241.841	206.433	221.553	227.943	NO
Sirpa	264.943	285.652	307.04	246.744	248.144	260.703	NO
Gm16286	264.643	230.337	233.743	251.715	256.369	242.586	NO
Tmem147	264.492	241.045	273.987	262.925	263.117	232.525	NO
Mtmr6	264.407	233.072	225.639	170.028	192.398	221.809	NO
Pithd1	264.199	251.888	244.048	267.404	249.431	212.251	NO
Xbp1	263.877	303.15	276.674	251.069	240.851	204.874	NO
Nrn1	263.82	218.403	271.611	243.295	211.186	227.951	NO
Pfdn2	263.776	256.333	271.15	264.238	282.228	268.767	NO
Ociad1	263.609	235.447	242.826	226.96	229.364	227.365	NO
Magee1	263.139	264.396	243.015	183.537	200.47	233.031	NO
Phyh	263.021	266.19	252.219	223.424	232.308	236.672	NO
Ap3m2	262.997	239.05	220.253	206.294	190.698	193.843	NO
Serpini1	262.955	262.894	205.331	169.795	221.424	209.476	NO
Ankrd46	262.78	250.845	244.755	241.517	228.754	222.453	NO
Pnma8b	262.236	300.98	271.952	257.291	229.538	222.892	NO
Tspyl2	261.886	272.465	234.316	304.04	284.739	252.744	NO
1500009C09Rik	261.323	242.042	228.33	252.598	238.303	216.802	NO
Camkk1	260.972	255.209	257.875	228.097	241.174	246.654	NO
Ccdc124	260.293	237.216	265.658	260.107	253.001	236.731	NO
Elob	260.162	283.822	248.409	283.636	232.421	248.554	NO
Gpx4	260.141	232.056	251.047	271.343	258.08	261.688	NO
Fis1	259.874	233.051	257.47	254.704	255.029	253.624	NO
Pdp1	259.446	223.402	281.834	202.506	185.188	234.419	NO
Nrxn1	258.713	219.123	210.241	165.71	191.224	214.704	NO
Luzp2	258.701	235.496	252.073	184.187	203.678	272.634	NO
Srsf7	258.446	269.507	245.53	203.316	192.909	207.765	NO
Dnajc8	258.218	251.179	251.587	260.711	268.293	249.106	NO
Ptp4a2	258.218	203.879	230.035	228.56	253.262	260.136	NO
Zdhhc22	258.032	212.218	242.363	375.605	270.785	189.857	NO
Cd47	257.74	230.71	239.866	208.177	231.82	237.235	NO
Lynx1	257.53	241.171	229.334	162.729	233.533	302.262	NO
Ndufc1	257.079	260.882	230.277	258.321	251.48	251.951	NO
Spcs1	256.956	263.547	252.881	256.711	225.753	220.202	NO
Cox5b	256.817	259.387	240.654	265.468	252.08	256.443	NO
Ubqln2	256.132	451.326	456.936	357.699	392.548	407.684	NO
Laptm4b	255.686	225.578	228.654	182.369	219.422	242.775	NO
Oxr1	255.649	277.814	237.93	160.579	203.836	238.578	NO
Kctd13	255.526	242.509	243.283	276.243	243.386	212.567	NO
Rps15	255.283	266.016	253.758	283.669	242.862	272.847	NO
Naxe	254.514	246.546	244.786	251.907	248.579	227.616	NO
Cldnd1	254.494	255.074	226.162	227.278	264.151	225.245	NO
Rbfox1	254.318	239.83	237.17	167.829	186.091	242.788	NO
Ndel1	253.576	257.94	241.688	240.649	242.51	218.036	NO
Prdx6	253.244	260.18	263.268	264.119	252.48	284.644	NO
mt-Tc	252.438	287.315	280.366	587.094	481.644	718.469	YES
Reep2	251.571	245.078	229.52	217.889	205.027	219.842	NO
Nme1	251.368	239.569	249.674	246.502	213.078	193.724	NO
Mrpl41	250.546	234.553	257.568	281.382	238.942	230.097	NO
Habp4	250.226	426.083	412.413	467.485	488.31	431.267	NO
Pcnp	250.147	208.36	204.528	201.365	238.917	234.948	NO
Ndufa9	250.145	250.326	238.412	222.542	247.266	221.545	NO
Cox5a	249.713	247.106	251.418	215.445	207.949	223.568	NO
Cuedc2	249.606	229.216	247.878	264.765	264.258	232.164	NO
Dync1i1	249.588	280.674	216.671	194.734	209.243	186.854	NO
Trappc3	248.929	219.284	220.739	249.304	265.71	230.757	NO
Pcdh9	248.835	282.389	213.293	147.262	238.006	277.458	NO
Pin1	248.827	230.822	235.405	275.291	221.822	202.343	NO
Oaz1	248.567	250.764	246.582	255.723	242.78	234.692	NO
Atp5mpl	248.285	237.598	199.783	247.959	236.259	271.736	NO
Gmfb	248.24	201.559	208.248	164.856	173.928	188.509	NO
Aamp	247.983	230.792	229.134	251	241.843	205.401	NO
Gabra3	247.561	208.216	202.032	159.311	184.39	190.67	NO
Fbxw11	245.878	264.32	237.293	185.829	215.973	233.496	NO
Pacsin1	245.803	254.44	266.293	243.007	224.137	229.999	NO
Strap	245.715	228.754	233.095	187.528	199.059	204.13	NO
Fgf13	245.686	235.455	232.136	188.004	194.017	210.262	NO
Mien1	245.493	251.794	262.979	239.867	219.695	224.572	NO
Ddost	244.749	251.081	250.586	246.025	241.055	209.695	NO
Cacnb3	244.57	267.45	267.32	269.243	229.645	242.5	NO
Ado	244.532	188.384	185.071	157.735	208.406	238.102	NO
Kif3a	244.504	237.074	236.135	191.714	195.267	208.517	NO
Actr3b	244.392	227.11	208.377	179.493	192.457	205.965	NO
Nap1l4	244.335	237.669	215.513	213.471	221.661	200.143	NO
Nrip3	243.911	276.361	192.747	132.023	224.568	212.831	NO
Sfr1	243.901	246.004	257.299	206.203	200.576	207.789	NO
Gprasp1	243.835	246.729	203.995	153.083	185.199	206.841	NO
Eif1b	243.805	241.722	250.93	243.918	222.141	221.189	NO
Osbpl1a	243.664	218.732	228.58	195.949	204.522	234.273	NO
Cd200	242.958	222.689	207.423	199.552	199.024	159.892	NO
Pcbp1	242.905	302.24	290.767	241.639	248.54	247.203	NO
Ddx1	242.43	214.426	196.804	180.913	217.088	203.178	NO
Pip5k1c	242.384	218.527	233.621	226.087	228.475	258.709	NO
Camta2	242.002	234.295	238.099	212.31	214.835	257.524	NO
Tmem184c	241.913	223.825	204.458	157.478	196.642	210.737	NO
Sumo1	241.692	226.876	228.12	240.267	237.528	194.691	NO
Ywhaq	240.416	240.298	212.388	194.56	210.108	196.82	NO
Atp2b2	240.275	232.197	219.993	143.198	162.838	230.733	NO
Ak1	239.879	227.101	225.164	255.169	248.199	220.353	NO
mt-Ti	239.819	389.209	266.617	599.006	455.921	533.252	NO
Tm2d2	239.572	241.18	227.463	239.334	219.807	198.973	NO
Gnb2	239.572	266.287	270.854	256.133	237.611	226.37	NO
Basp1	239.316	251.739	273.428	253.306	233.842	252.288	NO
Atp5d	239.024	249.608	269.682	240.745	219.077	225.356	NO
Ndufs6	238.921	251.46	236.61	236.145	226.727	237.747	NO
Mfn2	238.877	232.691	208.123	193.965	192.692	214.114	NO
Slc25a11	238.547	235.27	206.69	205.981	224.659	204.736	NO
Clta	238.327	232.28	251.145	226.488	215.285	211.248	NO
Dtx3	238.092	241.269	231.018	268.301	275.116	231.023	NO
Ggt7	237.964	237.192	228.778	231.024	217.968	232.549	NO
Serp2	237.702	221.25	250.431	244.735	206.756	215.536	NO
Map7d1	237.262	329.678	316.974	307.79	336.28	316.8	NO
Gipc1	237.036	224.448	247.023	274.158	240.856	206.21	NO
Mrpl28	236.863	222.83	243.698	262.405	224.693	192.635	NO
Ap2s1	236.765	222.203	243.011	251.429	213.713	212.126	NO
Tgoln1	236.74	235.347	209.564	178.88	196.249	207.121	NO
Rnf208	236.704	250.491	244.117	229.292	218.506	230.465	NO
Psmd14	236.686	225.431	207.268	195.615	213.749	185.8	NO
Gatm	236.649	244.419	204.912	157.758	272.733	331.934	NO
Cox7c	236.6	229.564	182.538	215.112	226.117	254.625	NO
Pla2g7	236.237	249.532	243.162	248.54	252.023	284.463	NO
Smim13	235.932	414.282	362.176	262.627	317.202	369.165	NO
Kcnk1	235.756	229.906	209.052	168.747	214.429	219.121	NO
Bag1	235.248	589.327	582.014	626.697	591.722	519.889	NO
Sar1a	235.225	234.63	219.825	193.364	201.755	193.203	NO
B230209E15Rik	235.089	242.154	228.367	297.769	342.604	335.32	NO
Caly	235.081	246.627	254.192	292.544	216.233	185.712	NO
Pcp4	234.743	193.614	188.007	89.9524	143.873	212.992	NO
Atp5pb	234.63	219.711	213.121	187.012	207.048	206.211	NO
Tuba4a	234.12	230.123	236.937	175.922	178.946	200.739	NO
Mat2b	233.908	223.368	198.45	187.151	210.444	211.106	NO
Psma7	233.875	242.553	234.467	255.79	242.161	226.478	NO
Rcn2	233.582	234.512	233.099	187.82	215.215	222.967	NO
Uba1	233.311	250.266	214.562	170.098	186.756	209.518	NO
Gabarap	233.255	212.007	241.302	255.532	219.453	200.142	NO
Dctn1	232.878	229.822	208.868	191.904	201.418	210.771	NO
Faim2	232.771	231.398	219.384	207.968	214.956	206.523	NO
Smdt1	232.426	237.091	256.481	258.337	236.352	236.302	NO
Cltc	232.173	215.508	197.975	137.078	162.397	196.659	NO
Gaa	231.371	272.295	252.413	227.08	205.042	197.018	NO
Ndufs7	230.637	235.074	241.904	250.01	223.319	203.038	NO
Gars	229.586	240.397	204.541	176.825	188.815	190.471	NO
Ap4s1	229.27	210.593	212.137	213.564	214.282	203.412	NO
Psmd4	229.262	224.204	213.249	243.117	247.959	199.18	NO
Camk2b	228.964	284.983	248.177	211.637	222.425	245.735	NO
Acsbg1	228.88	243.996	221.374	194.471	220.478	275.403	NO
Cdkn2d	228.839	207.543	214.55	215.666	216.635	198.379	NO
Fgf14	228.603	175.738	165.078	161.556	179.274	202.066	NO
Epn1	228.373	232.106	248.588	268.517	263.205	254.638	NO
Phactr1	228.223	219.273	228.306	203.012	205.043	220.16	NO
Fxyd7	227.987	226.154	249.784	233.482	188.245	206.891	NO
Fkbp4	227.895	237.056	217.975	199.129	223.453	194.625	NO
Clip3	227.86	240.299	225.445	195.27	197.851	213.187	NO
S1pr1	227.051	236.299	243.668	225.316	215.223	251.689	NO
Kif1b	226.882	184.956	217.726	164.191	192.579	250.188	NO
Ewsr1	226.736	230.616	200.267	207.843	218.37	203.113	NO
Tmem222	226.339	223.016	224.135	242.224	224.877	196.315	NO
B930095G15Rik	226.198	254.069	234.24	270.574	219.71	240.681	NO
Golt1b	225.874	170.775	182.982	189.128	197.117	192.004	NO
1500011B03Rik	225.753	194.536	209.972	211.423	197.239	188.416	NO
C1qtnf4	225.712	260.942	252.61	291.817	215.897	232.084	NO
Gna11	225.71	207.33	247.883	290.122	263.08	238.306	NO
Vps28	225.547	215.236	222.122	248.699	221.518	189.016	NO
Sfxn3	225.476	217.363	217.344	192.589	212.103	194.546	NO
Jpt1	225.202	226.372	230.284	249.59	207.04	182.822	NO
Hnrnpa2b1	225.026	221.35	214.773	164.732	184.138	197.889	NO
Alg2	224.97	234.625	198.014	163.91	188.299	191.841	NO
Ank	224.858	226.866	205.122	173.851	201.099	216.053	NO
Rbfox3	224.77	212.649	209.026	207.087	195.979	219.311	NO
Plppr4	224.648	184.371	171.222	114.608	119.002	128.165	YES
Slc4a10	224.597	189.957	184.669	116.706	160.147	178.428	NO
Cct6a	224.424	229.751	204.704	188.454	203.673	180.052	NO
Dnaja2	224.088	220.439	222.036	179.345	186.788	197.209	NO
Rgs7bp	223.876	177.383	207.382	172.188	180.434	220.577	NO
Rer1	223.867	186.413	202.533	198.654	196.827	195.437	NO
Rap1gds1	223.845	235.297	191.326	128.432	168.608	199.691	NO
Cpne6	223.084	221.762	238.112	288.154	186.374	148.591	NO
Rprml	222.863	205.815	200.998	202.286	171.962	150.371	NO
Selenos	222.612	203.685	234.686	221.8	206.51	208.227	NO
Hk1	222.468	230.088	203.237	155.223	174.429	197.117	NO
Dynll2	222.453	401.053	435.324	354.488	507.963	540.015	NO
Dlgap1	222.143	228.34	206.012	175.249	188.664	213.528	NO
Fkbp2	221.703	209.253	248.096	218.227	209.326	219.242	NO
Pnma8a	221.081	216.857	212.771	189.219	170.452	158.486	NO
Dclk1	220.195	199.703	205.199	149.46	160.98	221.137	NO
Tle5	220.152	257.638	307.355	332.076	292.968	268.859	NO
Klf10	220.115	251.483	208.111	139.054	71.8297	76.0032	YES
Cdk5	219.569	197.959	205.191	212.199	200.457	200.616	NO
Flot1	219.548	208.723	222.863	251.559	224.324	181.808	NO
Vstm2a	219.162	187.063	192.52	127.99	145.244	152.582	NO
Manbal	219	220.559	241.89	259.233	235.59	210.036	NO
Mzt1	218.232	186.367	186.664	177.205	196.944	197.668	NO
Hagh	218.184	200.92	206.425	189.975	186.034	191.202	NO
Tomm20	218.038	213.214	191.131	184.577	195.462	201.357	NO
Fads2	217.426	235.489	229.172	212.387	227.968	229.444	NO
Klf13	217.408	160.36	195.823	207.21	190.954	197.909	NO
Sbds	217.368	215.037	201.089	209.829	214.796	200.845	NO
Tacc1	217.151	195.475	199.695	222.485	200.353	207.856	NO
Purb	216.856	174.397	186.081	187.328	206.992	218.525	NO
Gnb5	216.709	206.747	207.014	194.127	199.615	177.431	NO
Spock2	216.6	213.933	214.893	230.169	267.622	232.649	NO
Idh3b	216.279	209.646	200.672	193.216	197.329	194.424	NO
Nr1d1	216.107	228.222	145.658	126.882	164.867	174.025	NO
Get3	215.712	182.607	207.958	206.56	203.967	197.573	NO
Bnip3l	215.694	169.039	179.843	185.667	195.306	182.058	NO
Inafm2	215.579	197.617	186.199	210.338	204.462	183.489	NO
Tmem179	215.567	233.51	219.513	204.766	213.344	201.253	NO
Chmp5	215.486	198.93	194.484	173.925	186.897	188.555	NO
Reep1	215.35	233.396	187.223	144.632	175.024	180.593	NO
Gpd1	215.195	206.907	200.486	200.02	204.685	194.516	NO
Bend6	214.917	236.404	236.392	203.912	243.204	258.752	NO
Vamp4	214.29	192.923	194.473	186.301	195.87	174.53	NO
Ccdc92	213.804	204.365	206.453	221.628	220.635	213.47	NO
Puf60	213.597	211.696	199.961	216.463	215.519	179.062	NO
Nudt3	213.369	211.789	269.879	276.534	264.016	237.754	NO
Tmed4	213.201	186.884	189.529	209.014	208.172	176.896	NO
Ephx4	213.183	231.22	245.23	206.874	230.816	215.521	NO
G3bp2	212.974	214.864	201.983	165.232	174.31	174.517	NO
Cep19	212.827	205.179	191.879	154.837	165.149	164.211	NO
Map2k4	212.536	223.596	211.174	156.693	187.892	210.63	NO
Cryab	212.272	253.239	198.944	128.136	215.453	245.905	NO
Nptx1	212.188	208.874	205.267	124.463	163.949	186.524	NO
Oxct1	212.102	217.051	213.479	183.663	196.867	191.401	NO
Arpc1a	212.02	215.745	202.592	189.05	190.424	180.63	NO
Micu3	211.961	121.942	168.848	161.825	170.954	183.596	NO
Ppp2r5b	211.52	182.57	175.284	206.318	210.432	189.645	NO
Ppp2r2b	211.434	218.764	196.942	178.146	184.466	184.945	NO
Plpp3	211.323	200.655	217.481	208.893	198.75	229.976	NO
Sec23a	211.106	203.69	176.866	139.034	160.856	157.612	NO
Smim7	210.75	198.569	198.892	204.242	199.479	189.637	NO
Prdx2	210.328	211.926	202.29	216.628	201.417	181.799	NO
Itm2a	210.237	209.352	219.483	127.72	225.099	248.812	NO
Dbi	209.861	224.754	226.362	216.671	226.952	235.314	NO
Pfkl	209.835	189.263	172.47	192.743	167.786	156.103	NO
Vps4a	209.601	191.754	188.419	174.871	186.494	182.434	NO
Rab11fip4	209.566	213.477	207.238	232.237	227.091	210.316	NO
Rab18	209.537	181.001	181.524	157.787	173.069	177.47	NO
Ppp5c	209.15	205.036	182.334	189.982	196.665	178.454	NO
Cct7	208.853	210.16	192.388	200.398	194.933	167.178	NO
Gsk3b	208.694	141.872	181.569	176.373	191.302	214.141	NO
Apba2	208.688	209.774	207.484	170.693	173.881	181.648	NO
Ptk2b	208.631	209.95	193.628	163.716	153.306	182.964	NO
Oat	208.333	215.514	201.763	187.571	199.622	186.142	NO
Selenop	208.174	222.496	208.616	197.034	240.348	236.188	NO
B3galnt1	208.068	203.841	181.055	161.074	165.806	151.543	NO
Csde1	208.028	192.517	175.09	149.019	180.288	192.366	NO
Arf4	207.93	216.724	212.925	171.223	174.929	177.456	NO
Rnf115	207.874	228.6	209.922	185.524	206.112	210.569	NO
Ndufa6	207.359	212.061	204.95	211.562	197.087	208.46	NO
Cstf2t	207.106	192.75	174.17	146.045	153.858	162.908	NO
Rps14	207.079	211.04	203.256	209.235	207.722	209.333	NO
Plekhb1	206.959	238.628	183.09	158.403	275.535	291.957	NO
Slc12a5	206.208	221.617	215.02	160.258	160.48	205.383	NO
Tmem50b	206.105	201.567	194.141	159.903	163.778	167.801	NO
Ina	206.075	209.084	205.536	167.358	189.504	194.645	NO
Ntm	206	178.448	184.764	187.821	193.237	214.109	NO
Pdia6	205.887	212.694	233.723	191.758	170.676	149.255	NO
Mapk8ip2	205.78	208.456	191.799	169.557	192.472	195.597	NO
mt-Ta	205.325	314.932	272.854	500.306	374.62	632.123	NO
Vps26a	205.12	206.759	180.52	149.688	183.376	172.018	NO
Ttc1	204.981	187.953	189.222	203.807	215.226	188.12	NO
Dmtn	204.066	175.175	194.349	191.362	173.025	180.19	NO
Rcan2	203.995	200.596	154.828	117.553	162.527	198.247	NO
Spin1	203.875	212.501	200.073	178.295	186.365	185.384	NO
Spcs2	203.613	195.023	203.747	217.396	205.944	174.34	NO
Mrps12	203.466	201.652	225.716	205.709	184.136	163.669	NO
Marcksl1	203.446	229.272	237.687	161.314	143.782	104.312	NO
Selenof	203.247	194.293	194.92	162.558	184.131	189.733	NO
Vps41	203.145	196.578	171.735	138.431	160.644	173.74	NO
Gapdh	202.766	214.676	207.72	181.711	185.392	197.399	NO
Gabra5	202.707	215.377	181.487	129.737	170.873	151.736	NO
Cnp	202.634	264.549	171.972	125.744	236.524	273.861	NO
Klc2	202.607	174.134	190.755	176.497	202.269	217.56	NO
Abi1	202.251	188.962	177.436	148.987	171.649	163.706	NO
Map1lc3b	202.223	188.858	185.525	191.335	183.818	184.129	NO
Mapre2	202.115	200.361	184.415	168.509	164.345	164.62	NO
Rangap1	202.02	207.828	195.985	173.701	178.982	178.415	NO
Atox1	201.958	197.046	196.074	192.081	181.563	201.348	NO
Cirbp	201.695	214.608	173.066	222.527	247.404	228.871	NO
Gad1	201.678	213.524	180.816	123.828	174.647	210.688	NO
Sh3glb2	201.596	199.043	217.214	272.741	221.175	202.96	NO
Pdhb	201.521	192.393	180.948	169.149	184.635	172.984	NO
Vdac2	201.154	203.004	184.823	191.036	200.939	183.386	NO
Psma5	201.111	196.545	192.117	197.327	168.198	164.666	NO
Prelid3b	200.72	180.645	180.345	164.891	178.949	171.484	NO
Spry2	200.503	105.399	140.471	186.733	141.196	155.886	NO
Sdhaf4	200.484	175.097	195.593	186.741	170.656	182.087	NO
Morf4l2	200.179	198.889	188.158	178.993	172.659	157.428	NO
Dld	200.059	176.643	168.72	134.411	164.022	165.068	NO
Dusp26	199.88	198.022	200.976	222.408	220.944	179.376	NO
Dnajc6	199.788	185.337	172.339	134.518	146.227	163.17	NO
Aktip	199.455	184.663	176.823	181.699	202.928	192.998	NO
Inpp4a	199.389	135.156	161.938	178.53	170.801	181.758	NO
Stx1b	199.276	181.63	184.091	174.27	200.062	204.414	NO
Ndufb3	199.198	187.673	192.041	188.67	182.652	193.626	NO
Ptprn	198.591	376.161	447.471	407.663	371.87	341.618	NO
Tollip	198.54	201.64	169.933	140.489	160.046	166.485	NO
Anp32e	198.233	198.938	183.307	158.38	184.086	193.473	NO
Calr	197.95	196.568	244.003	173.396	170.721	176.299	NO
Klhl9	197.95	147.515	164.518	148.25	146.941	157.52	NO
Ube2n	197.599	183.366	158.353	146.627	163.546	162.629	NO
Tmem151a	197.395	190.205	181.124	177.972	189.442	170.257	NO
Mid1ip1	197.385	197.2	218.249	184.901	217.457	236.603	NO
Herpud1	197.384	202.147	163.241	154.361	163.413	177.127	NO
Pfdn5	197.002	208.9	227.436	215.717	207.365	201.451	NO
Hspbp1	196.966	183.224	177.92	194.126	172.841	169.293	NO
Higd1a	196.964	189.392	174.751	179.952	180.261	166.284	NO
Gm42732	196.853	132.901	137.601	124.678	154.563	180.976	NO
Lmbrd1	196.784	190.402	177.24	136.45	166.93	178.77	NO
Vps29	196.298	181.579	177.298	173.282	174.332	167.192	NO
Fbxw5	196.264	192.442	185.908	198.827	189.103	189.082	NO
Gabra4	195.861	173.274	160.233	123.345	145.943	159.234	NO
Pianp	195.75	235.671	225.24	244.516	214.087	195.509	NO
Prdx3	195.622	195.71	157.661	147.608	174.369	156.178	NO
Pfn1	195.575	196.863	225.632	215.65	195.658	179.869	NO
Prdx1	195.169	199.445	195.862	199.222	200.507	180.27	NO
Arhgdig	195.123	195.185	217.982	206.195	181.147	158.472	NO
Txnl4b	194.929	144.705	153.868	209.765	201.502	173.076	NO
Bccip	194.924	187.048	184.548	162.589	181.724	164.408	NO
Actr1a	194.881	190.126	178.084	163.761	172.122	171.484	NO
Gpi1	194.725	187.48	183.1	194.982	180.54	171.916	NO
Srp68	194.213	184.48	183.484	197.171	205.683	168.675	NO
Tmem47	194.212	186.744	187.875	164.678	187.934	182.413	NO
Ssb	194.199	182.225	187.124	149.655	174.77	165.011	NO
Dlat	193.971	188.052	163.598	133.832	161.751	164.849	NO
Chga	193.779	221.963	189.987	128.198	140.926	166.985	NO
Anp32a	193.708	172.174	188.626	187.811	190.042	166.131	NO
Gm43670	193.453	280.067	251.635	214.038	235.863	377.347	NO
Mapk9	193.449	200.304	181.767	147.673	173.861	209.118	NO
Tpt1	193.153	182.823	197.626	185.453	156.073	155.491	NO
Rac1	193.151	198.483	186.403	167.144	181.506	172.482	NO
Pde1a	192.952	193.546	168.693	153.512	195.729	162.398	NO
Mt1	192.932	258.969	177.52	244.167	194.477	228.521	NO
Snapin	192.924	184.995	182.232	190.485	198.279	199.89	NO
Dynll1	192.852	200.84	207.67	155.089	137.48	141.651	NO
Elmo2	192.67	190.411	184.76	143.72	139.412	164.225	NO
Mpped1	192.294	220.086	199.234	179.231	185.852	175.684	NO
Wdr47	192.18	180.132	151.731	112.368	128.897	142.058	NO
Hmgn3	192.052	173.03	186.96	174.212	179.97	191.84	NO
1810037I17Rik	191.602	183.266	187.806	193.741	178.268	167.563	NO
Pdxp	191.391	201.622	201.563	230.202	197.177	176.447	NO
Ly6e	191.155	188.073	201.774	171.877	170.283	213.714	NO
mt-Tv	190.541	262.939	146.562	517.323	322.014	525.148	NO
Cript	190.466	168.421	179.786	165.703	174.566	149.269	NO
Slc30a3	190.405	170.969	186.352	181.639	150.826	170.992	NO
Cstb	190.403	172.366	195.896	153.637	169.279	173.598	NO
Eif4a1	190.328	188.803	171.998	157.597	161.617	148.686	NO
Txn1	190.229	194.86	185.275	171.827	157.509	162.063	NO
Palm	189.681	201.759	189.501	215.776	202.367	187.344	NO
Fads1	189.629	203.171	192.785	163.732	178.113	192.833	NO
Abhd16a	189.615	192.811	169.893	196.439	191.432	177.62	NO
Ubc	189.304	188.528	185.229	148.752	163.643	182.194	NO
Dnajc5	189.219	190.379	172.336	154.132	164.795	177.205	NO
Diras1	188.961	182.578	163.27	190.269	210.168	187.378	NO
Rnf7	188.785	187.482	192.563	184.086	175.511	175.924	NO
Eps15	188.708	168.312	156.911	116.419	151.273	172.362	NO
Tmem160	188.428	188.171	197.742	179.652	162.065	188.337	NO
Gabbr1	188.227	221.928	246.952	218.58	235.942	220.433	NO
Mtfp1	188.203	182.179	190.343	180.519	158.664	158.296	NO
Grm3	187.833	202.65	166.613	146.417	147.622	179.145	NO
Timm13	187.576	181.677	195.469	187.219	172.574	182.969	NO
Pafah1b1	187.363	237	239.802	177.239	208.979	242.17	NO
Paip1	187.358	97.2816	128.065	124.316	149.206	167.335	NO
Srm	187.339	193.785	165.713	183.875	165.44	143.731	NO
Hspa9	186.918	183.433	164.419	123.739	159.352	164.305	NO
Degs1	186.741	194.243	171.526	137.812	165.778	172.094	NO
Abi2	186.692	163.045	165.057	148.11	159.862	165.026	NO
Nop10	186.616	171.452	164.526	180.84	150.859	170.831	NO
Acsl3	186.41	190.935	166.67	133.076	166.52	184.966	NO
Gnao1	186.164	198.335	192.136	166.243	161.146	175.187	NO
Bnip3	185.997	129.835	137.221	114.567	137.967	147.931	NO
Ube2j1	185.742	190.804	178.258	142.566	164.089	175.771	NO
Pmm1	185.551	184.045	195.796	179.651	167.103	166.273	NO
Hbb-bs	185.505	230.629	248.224	146.468	198.506	214.791	NO
Slc25a22	184.857	198.588	178.574	158.864	145.424	140.002	NO
Prxl2a	184.657	186.088	181.664	208.948	212.416	193.363	NO
Ephb6	184.653	177.401	165.323	154.421	155.416	150.49	NO
Rpl19	184.648	194.573	193.585	176.588	165.315	175.525	NO
Csnk2a1	184.182	134.052	136.113	148.078	156.342	166.075	NO
Ubl4a	183.897	162.985	167.948	165.814	160.931	152.201	NO
Ndufb1	183.722	182.423	118.966	171.087	172.672	191.277	NO
Rab15	183.519	188.964	203.087	197.327	182.824	178.106	NO
Nfe2l1	183.455	215.195	216.47	186.929	221.162	221.763	NO
Lratd1	182.585	146.21	171.413	129.221	117.782	153.503	NO
Rab5c	182.51	179.261	181.674	177.573	179.732	176.625	NO
Adam22	182.482	108.288	147.315	109.955	123.418	169.696	NO
Cttn	182.392	173.461	171.485	165.26	165.753	146.173	NO
Unc50	182.319	173.779	166.45	160.475	157.086	145.197	NO
Bcl2l1	182.193	185.468	170.499	182.375	195.022	163.683	NO
Tmem14a	182.132	172.91	200.752	172.174	166.092	185.678	NO
Tmem70	181.966	164.735	163.088	145.612	157.256	136.478	NO
Zmat2	181.859	157.944	171.044	162.719	168.175	166.418	NO
Ran	181.746	184.356	167.432	147.195	163.537	146.284	NO
B230217C12Rik	181.646	172.404	166.286	148.12	158.99	186.163	NO
Ugp2	181.328	168.164	173.31	159.963	180.314	172.803	NO
Fam234b	181.176	180.164	161.156	116.79	140.247	170.7	NO
Ighm	181.127	164.513	107.24	57.1529	148.079	193.432	NO
Cox7a2l	180.975	181.562	180.444	186.376	172.732	171.69	NO
C1qb	180.739	185.973	195.092	288.043	201.084	201.78	NO
Clptm1	180.157	204.31	209.794	203.62	209.291	185.531	NO
Ypel5	180.124	146.662	144.189	124.882	137.54	154.14	NO
Ssna1	179.957	172.389	187.679	202.63	180.078	162.234	NO
Eif5	179.93	169.308	192.576	164.61	212.442	218.082	NO
Lingo1	179.348	207.068	320.101	283.175	207.626	188.024	NO
Etfa	179.243	159.478	164.159	164.13	172.515	156.511	NO
Mapk8ip1	179.185	170.373	209.698	195.04	231.998	234.945	NO
Hcfc1r1	179.119	182.641	188.213	169.632	144.096	162.619	NO
Hars	179.064	174.676	160.516	147.793	153.552	142.916	NO
Ergic3	178.532	165.81	176.311	203.393	182.91	155.549	NO
Kif5b	177.983	171.059	159.102	150.624	185.934	194.878	NO
Cdc123	177.913	164.63	171.113	175.569	180.191	152.012	NO
Ppt1	177.845	171.943	157.45	154.396	163.136	169.399	NO
Chchd1	177.802	169.934	161.433	167.926	154.646	160.435	NO
Cltb	177.762	181.357	172.114	155.481	166.416	165.297	NO
Rgs5	177.713	110.438	134.23	94.6892	173.993	222.223	NO
Lysmd2	177.685	164.282	199.547	180.199	174.58	158.007	NO
Hsd17b12	177.378	164.122	163.765	156.347	169.082	154.351	NO
Drg1	177.216	149.99	152.512	163.436	166.677	135.465	NO
Fam163b	177.153	232.161	161.392	143.807	182.334	159.951	NO
Ift20	177.107	167.43	177.987	172.471	161.711	169.332	NO
St13	176.955	122.117	139.549	133.086	144.589	143.093	NO
Cckbr	176.9	185.054	161.862	202.508	177.906	127.429	NO
Rheb	176.857	169.969	169.671	169.14	152.363	132.724	NO
Bap1	176.835	171.748	167.693	167.927	161.821	163.337	NO
Hdgf	176.38	179.208	252.424	261.362	237.142	189.029	NO
Gnl3l	176.317	145.342	162.03	165.04	175.518	165.105	NO
Plppr2	176.232	191.771	195.174	157.982	150.593	150.309	NO
Bok	175.984	163.947	176.517	174.533	163.02	182.465	NO
Cdkn2aipnl	175.855	167.049	165.714	177.148	184.598	151.934	NO
Ier3ip1	175.822	171.034	163.496	146.573	149.167	160.784	NO
Thra	175.634	205.181	283.692	317.316	278.73	210.803	NO
Map2	175.594	151.294	152.384	116.269	139.398	186.817	NO
Cyb561	175.361	170.63	164.569	156.473	167.687	147.963	NO
Camk2g	175.259	165.242	154.575	125.655	158.213	181.585	NO
Fam3c	175.183	161.247	164.402	174.057	187.936	193.313	NO
Scn2a	175.128	150.025	143.993	115.085	124.535	136.625	NO
Pgk1	175.009	171.019	151.785	137.93	148.523	139.248	NO
Chst1	174.83	326.628	384.126	355.674	318.78	322.408	NO
Dnajc7	174.822	163.016	165.854	167.496	181.809	154.98	NO
Fbxw7	174.577	151.949	152.335	142.399	145.01	155.851	NO
Pfdn6	174.332	157.404	169.715	186.315	158.031	146.148	NO
Dctn5	174.309	160.737	161.597	161.877	150.355	144.514	NO
Cnih3	174.273	183.802	170.114	153.997	144.901	141.148	NO
Dnajb1	173.865	195.662	136.56	178.51	136.086	111.139	NO
Lamtor5	173.855	146.447	176.464	156.868	135.005	143.592	NO
Arpc5l	173.713	156.555	172.95	171.664	152.79	141.251	NO
Stk25	173.519	164.317	160.948	157.905	156.552	152.708	NO
Wars	173.313	167.595	156.146	146.305	141.203	140.843	NO
Blcap	172.97	188.262	163.265	161.909	157.998	136.498	NO
Rhob	172.687	163.549	162.038	149.71	154.199	165.399	NO
Smim12	172.671	166.49	178.427	167.856	158.535	162.503	NO
Pitpnb	172.107	158.412	164.097	167.731	179.666	150.452	NO
Phf24	172.031	172.862	163.293	161.562	158.409	170.238	NO
Eif1ax	171.709	159.553	148.626	118.132	141.076	147.899	NO
Ppp1r11	171.587	166.027	177.525	191.913	159.228	136.13	NO
Tmem178	171.479	163.181	170.127	137.427	165.965	154.435	NO
Hnrnpu	171.216	190.82	179.956	141.208	152.062	169.621	NO
Tpm1	170.979	161.189	175.533	192.958	166.188	152.536	NO
Abr	170.742	182.325	166.648	139.524	137.479	156.729	NO
Rab31	170.529	169.922	152.444	156.589	178.334	198.949	NO
Zranb2	170.52	151.834	164.008	115.577	133.901	171.586	NO
Cs	170.235	174.673	151.405	131.499	148.367	152.496	NO
Nicn1	169.989	172.101	173.802	180.042	165.012	166.197	NO
Klf9	169.927	208.218	183.773	153.095	172.862	183.817	NO
Extl2	169.795	153.113	146.127	127.979	137.406	156.903	NO
Tram1	169.794	125.874	149.363	148.649	160.296	148.055	NO
Pafah1b2	169.721	103.432	139.873	118.555	140.175	146.23	NO
Prkce	169.705	176.403	163.485	144.328	151.896	151.267	NO
Mrpl27	169.261	150.266	161.865	154.73	157.79	154.528	NO
Cope	169.248	167.188	164.085	183.43	167.502	151.362	NO
Tspan5	169.188	210.191	242.741	207.696	219.603	221.691	NO
Dbn1	169.18	148.53	170.716	153.211	136.166	141.791	NO
Btg2	169.038	130.042	62.0472	194.642	58.7869	60.22	NO
Fndc4	168.648	163.888	163.161	182.832	173.987	158.979	NO
Pvalb	168.539	147.894	146.854	81.8886	171.491	248.276	NO
Lancl1	168.481	149.369	152.415	133.484	142.146	149.089	NO
Stx12	168.48	168.157	151.857	131.93	148.259	141.094	NO
Slc7a4	168.303	162.453	174.339	157.991	155.842	136.693	NO
Cox6c	168.055	159.083	143.624	155.34	159.365	180.971	NO
Gfra2	167.975	164.368	189.842	206.636	172.405	152.95	NO
Atp2a2	167.968	164.684	176.208	149.24	160.244	170.983	NO
Arpc3	167.957	168.226	168.619	118.141	126.642	133.986	NO
Thumpd1	167.821	169.687	144.9	151.698	152.433	133.989	NO
Fkbp8	167.544	198.032	225.831	257.626	232.449	195.178	NO
Snap91	167.525	209.17	276.395	192.79	191.003	185.145	NO
Gpr37l1	167.287	190.864	180.41	164.148	160.266	196.959	NO
Anxa5	167.234	161.28	182.291	157.395	212.314	206.87	NO
Nptn	166.977	98.696	113.129	113.021	110.352	132.417	NO
Arl3	166.823	154.74	178.915	174.1	160.707	144.041	NO
Lyrm4	166.803	113.066	138.527	170.724	145.113	140.252	NO
Sec22b	166.788	131.453	140.972	132.214	138.49	147.166	NO
P4hb	166.661	175.302	158.723	141.017	159.706	145.064	NO
Lgalsl	166.497	165.024	137.413	98.4434	126.942	130.726	NO
Dusp8	166.146	80.528	102.502	110.113	105.839	128.854	NO
Dync1li2	166.107	165.241	146.139	121.12	151.588	165.074	NO
Rpn1	165.94	172.199	167.454	152.473	155.485	138.483	NO
Itfg1	165.612	158.165	137.826	115.282	128.847	130.418	NO
Eif2b5	165.576	184.542	176.112	183.028	182.096	162.433	NO
Stx7	165.435	161.12	155.806	127.105	141.324	134.515	NO
Hrh3	165.326	162.354	142.839	124.697	110.869	131.14	NO
Ddb1	165.278	145.94	137.093	103.403	121.082	146.214	NO
Pgap4	165.186	165.606	150.648	143.127	151.346	137.097	NO
Elovl4	165.177	170.384	145.126	105.273	131.732	144.176	NO
Aip	164.971	171.179	166.156	190.017	168.114	139.417	NO
Tprgl	164.954	384.998	465.311	535.245	471.183	354.716	NO
Ttc33	164.9	153.113	160.006	126.484	147.575	132.519	NO
Bmyc	164.878	152.762	150.265	143.698	153.411	153.819	NO
S100b	164.586	159.762	169.711	169.165	166.994	216.364	NO
Fbxo44	164.312	152.43	154.507	155.044	174.886	163.281	NO
Rasgef1a	164.148	188.902	232.288	230.078	213.629	181.573	NO
Rpusd1	164.073	143.92	156.095	172.697	157.473	152.589	NO
Ap2a2	164.015	155.137	142.462	147.235	135.148	142.744	NO
Pcmtd2	163.872	156.656	144.001	97.6571	115.359	128.494	NO
Lamtor2	163.774	158.381	165.613	177.381	164.902	157.104	NO
Ralyl	163.558	157.13	139.4	120.073	137.793	127.157	NO
Gabrg2	163.208	70.015	90.2522	78.8746	96.2177	119.569	NO
Acly	162.935	157.607	151.744	109.144	127.185	142.704	NO
Mlc1	162.827	174.849	175.22	168.855	164.148	187.26	NO
Ppa1	162.823	158.45	149.733	142.909	141.341	134.536	NO
Abat	162.812	158.819	144.087	136.65	142.519	165.966	NO
Rplp0	162.733	178.312	177.229	173.899	177.49	165.767	NO
Nenf	162.524	155.548	177.178	158.088	151.058	161.576	NO
Anapc5	162.507	160.034	153.742	153.196	151.88	149.647	NO
Pdk2	162.502	149.264	159.044	187.024	166.714	154.691	NO
Ppp1r12a	162.462	144.013	146.108	120.947	123.23	124.262	NO
Tpgs1	162.329	158.797	161.681	174.621	150.557	139.836	NO
Dtd1	162.278	162.007	151.612	151.152	150.431	133.606	NO
Sumo3	162.174	153.052	144.678	176.962	182.844	147.436	NO
Fos	162.106	202.17	76.4329	202.687	35.262	29.9564	NO
Ivns1abp	161.928	165.719	142.282	100.265	116.775	140.275	NO
Eif3h	161.923	172.51	162.175	148.74	159.397	139.588	NO
Amfr	161.862	217.878	226.465	213.951	228.428	214.905	NO
Bin1	161.791	163.35	171.761	159.173	169.521	169.155	NO
Arxes2	161.723	162.651	153.298	131.904	139.001	134.102	NO
Gpx1	161.711	156.064	173.132	145.531	144.802	145.52	NO
Cnr1	161.567	165.65	241.126	172.083	171.086	138.443	NO
Dbnl	161.554	152.747	147.02	162.765	152.568	135.959	NO
mt-Ts2	161.364	232.8	125.817	585.103	385.914	326.034	YES
Dcaf7	161.333	168.936	143.665	119.065	128.934	145.244	NO
Rbx1	161.205	150.903	151.244	138.601	146.322	141.007	NO
Chchd2	161.193	162.855	170.311	145.881	146.401	151.219	NO
Septin5	161.136	153.713	155.919	142.702	134.017	151.173	NO
Fam168a	161.022	170.191	156.908	109.113	126.148	164.409	NO
Rad23b	160.945	161.289	151.043	129.093	139.024	147.77	NO
Jak1	160.905	153.589	144.009	108.125	114.454	137.696	NO
Ap2a1	160.678	171.225	153.843	130.744	141.51	149.602	NO
ENSMUSG00000106106	160.541	221.546	153.783	143.797	130.602	176.69	NO
Tmem151b	160.254	142.134	167.01	195.577	184.962	152.722	NO
Fundc1	160.207	147.937	142.788	128.048	146.691	145.06	NO
Rpl14	160.089	182.094	175.481	158.882	167.624	162.032	NO
Ppp1cb	159.94	185.476	197.883	150.289	180.771	180.171	NO
Ddx24	159.833	165.244	150.762	135.825	144.934	154.091	NO
Tmx1	159.685	148.02	131.127	109.019	145.571	140.008	NO
Shisa5	159.335	155.447	155.973	164.5	164.542	137.21	NO
Lancl2	159.05	145.607	137.257	114.503	118.481	121.391	NO
Mgll	159.014	138.096	159.753	139.436	157.442	184.728	NO
Rab28	158.81	142.47	143.76	140.182	143.414	126.011	NO
Get1	158.67	152.767	147.507	164.004	149.505	128.608	NO
Ramac	158.454	153.193	144.968	128.884	149.356	135.541	NO
Slc25a44	158.32	170.941	140.266	154.469	149.437	135.061	NO
Rps3a1	158.118	161.883	153.611	148.186	158.857	160.372	NO
Septin11	158.079	143.039	157.762	148.769	129.493	137.459	NO
Gria3	158.036	155.348	145.229	104.044	122.535	136.941	NO
Slc3a2	157.853	178.368	159.407	149.959	149.205	139.598	NO
Klhdc2	157.608	182.139	164.895	144.539	156.8	155.971	NO
Zc2hc1a	157.441	148.931	139.232	100.75	114.447	122.963	NO
Tubb4b	157.361	165.141	156.891	136.932	138.495	135.833	NO
Chmp1a	157.331	144.323	149.8	176.595	164.186	147.111	NO
Sf3b2	157.299	144.272	138.413	139.381	137.615	136.296	NO
Npdc1	157.242	158.502	162.889	141.407	140.296	142.13	NO
Maf1	157.134	155.835	151.918	145.605	148.894	142.347	NO
Ubl7	156.891	159.599	149.908	148.167	146.355	142.148	NO
Mrpl18	156.875	152.946	159.681	144.716	147.761	135.116	NO
Araf	156.762	140.863	139.606	128.836	139.861	129.79	NO
Zcchc17	156.761	145.503	154.791	162.97	154.499	131.58	NO
Strbp	156.633	143.038	141.783	109.087	129.984	161.364	NO
Chmp2b	156.606	148.276	145.303	119.124	125.399	125.991	NO
Tsg101	156.599	136.819	136.232	137.419	142.59	128.019	NO
Cetn2	156.582	141.609	146.145	134.611	125.498	117.748	NO
Srsf2	156.483	150.772	173.194	174.342	171.946	209.307	NO
Tug1	156.456	130.291	133.5	122.98	126.889	133.701	NO
Snx2	156.292	141.385	135.254	126.24	139.468	124.668	NO
Mast3	156.182	146.101	171.518	115.21	107.095	144.797	NO
Cnih1	156.147	152.837	152.06	127.258	119.348	136.506	NO
Gtf2f1	155.718	131.037	140.603	132.6	148.112	141.734	NO
Poldip2	155.583	155.5	145.434	150.102	167.362	158.222	NO
Pebp1	155.521	157.173	163.077	157.931	143.902	142.01	NO
Pgm2l1	155.468	129.766	136.019	123.459	132.297	128.642	NO
Septin8	155.402	167.99	170.785	151.273	164.008	155.822	NO
Fkbp1b	155.3	128.704	150.679	114.429	110.534	117.423	NO
Cul1	155.196	154.666	149.444	122.476	141.033	139.049	NO
Rnf112	155.173	141.224	147.703	121.878	123.173	161.498	NO
Ttyh1	155.164	162.357	167.774	173.836	161.449	166.607	NO
Dnajc18	155.134	132.471	129.075	158.898	156.531	145.759	NO
Naa50	155.012	146.188	140.149	116.383	134.488	126.105	NO
Eif3c	154.982	158.876	141.625	132.936	132.395	131.745	NO
Iscu	154.956	151.586	155.589	165.282	153.973	147.043	NO
Paics	154.934	159.908	145.488	124.526	142.864	137.204	NO
Smarcc2	154.841	157.74	158.351	158.342	177.078	163.949	NO
Tmem256	154.675	164.466	144.774	178.306	152.102	166.592	NO
Gm19932	154.619	198.454	198.323	197.323	197.85	326.221	NO
Pgp	154.44	153.809	161.512	176.927	166.509	152.393	NO
Hapln4	154.412	128.153	144.321	98.7466	122.132	161.029	NO
Htra1	154.4	143.73	150.369	128.553	144.418	179.934	NO
Cwc15	154.245	141.193	146.548	130.573	145.213	132.838	NO
Gja1	153.915	146.782	165.113	128.546	158.006	161.47	NO
Pex19	153.803	145.168	141.62	149.336	152.263	143.116	NO
Camkk2	153.243	165.076	155.054	117.483	127.721	158.78	NO
Rgcc	153.095	140.8	162.311	145.942	123.055	133.522	NO
Hgs	153.057	160.215	146.51	145.927	146.881	125.151	NO
Pcyox1	152.958	143.735	127.062	106.301	122.127	129.932	NO
Rps21	152.798	175.012	115.02	167.575	154.536	185.153	NO
Ahcyl1	152.661	145.371	139.745	137.778	148.912	168.909	NO
Selenom	152.369	145.759	155.163	158.329	162.579	153.672	NO
Mrpl50	152.316	154.14	132.163	121.362	137.676	119.667	NO
Ssr1	152.217	123.403	132.397	128.484	135.092	136.818	NO
Copg1	152.176	137.085	128.501	104.057	109.925	125.447	NO
Mapt	152.153	141.224	147.924	151.626	145.341	148.265	NO
Nhp2	151.91	143.466	144.288	151.743	140.901	124.133	NO
Scrn1	151.817	154.96	124.258	115.292	119.203	124.458	NO
Gpbp1	151.796	142.321	131.027	113.901	136.698	124.095	NO
Eif3g	151.786	153.752	150.854	149.733	143.149	131.905	NO
Brinp1	151.626	142.534	127.964	113.239	116.508	135.992	NO
Vps35	151.548	146.479	130.443	100.516	109.636	117.379	NO
Tma7	151.536	147.53	147.876	156.817	134.6	138.089	NO
Fabp3	151.486	132.642	142.223	132.114	121.489	114.827	NO
Cct4	151.299	159.474	142.974	122.645	123.244	112.37	NO
Micos10	151.16	142.746	156.706	149.002	151.034	146.731	NO
Nrcam	150.935	161.434	134.651	98.8188	110.168	128.732	NO
Penk	150.726	187.439	137.869	99.8131	107.033	140.994	NO
Glud1	150.679	154.897	149.082	126.148	152.66	160.025	NO
Cyb5a	150.62	144.803	153.541	135.955	130.406	132.843	NO
Tmem242	150.482	133.47	153.497	142.219	145.143	141.729	NO
Smpd1	150.395	144.215	141.111	133.534	138.771	125.913	NO
0610009B22Rik	150.362	137.422	150.378	134.008	137.659	133.913	NO
Cnot8	150.273	154.569	135.784	137.196	139.58	119.05	NO
Pigyl	150.244	148.014	151.889	150.816	151.473	155.017	NO
Anxa6	150.204	137.555	141.069	103.553	112.06	145.846	NO
Ptpn5	150.115	153.363	171.567	169.461	159.753	139.169	NO
Prrt1	150.103	142.684	162.867	165.944	124.209	120.858	NO
Clcn4	150.097	151.834	135.523	111.01	126.055	131.205	NO
mt-Tl2	150.055	138.594	121.22	416.754	337.731	321.335	YES
Retreg2	149.885	210.027	216.205	217.532	213.938	195.407	NO
Csdc2	149.722	159.462	151.216	174.668	162.911	146.334	NO
Cds2	149.707	176.044	152.785	124.38	136.791	150.101	NO
Susd4	149.68	145.862	143.137	141.249	134.999	144.507	NO
Cetn3	149.675	124.859	123.618	130.092	140.983	130.195	NO
Mpc1	149.649	140.214	136.674	136.707	132.818	144.604	NO
Ap1b1	149.625	153.928	142.785	116.045	131.763	147.935	NO
Dusp6	149.491	154.276	139.802	126.866	62.197	76.272	NO
Abhd6	149.474	154.251	158.804	137.824	133.622	131.887	NO
Aurkaip1	149.279	161.878	160.886	172.272	143.753	130.012	NO
Sel1l	149.123	151.075	136.028	92.6448	100.339	124.439	NO
Ndufa7	148.804	139.79	136.42	163.859	129.611	139.735	NO
Ogt	148.588	137.896	137.577	99.1163	108.135	138.861	NO
H2az1	148.503	149.424	133.448	134.278	125.54	118.701	NO
Snrpb	148.442	145.038	151.791	155.924	155.474	139.683	NO
Ubxn2a	148.306	145.32	132.38	101.013	131.916	147.926	NO
Scn1b	148.213	139.72	385.248	352.951	286.614	268.072	NO
Psmd6	148.07	149.359	134.939	127.903	127.555	116.351	NO
Tceal5	147.799	158.5	146.595	145.216	134.293	141.944	NO
Tmem170b	147.673	126.712	119.51	110.933	116.791	129.651	NO
Mcfd2	147.658	150.979	148.454	152.433	147.853	115.516	NO
Cdip1	147.575	137.332	132.469	141.905	139.395	130.683	NO
Tfg	147.509	149.862	130.441	113.884	112.107	117.448	NO
Ppp2r5d	147.388	135.705	127.284	132.26	134.018	124.132	NO
Stmn2	147.369	137.669	142.957	108.762	114.413	116.588	NO
Actn4	147.302	150.683	146.949	121.846	134.105	133.485	NO
Cyth2	147.292	142.461	129.036	130.916	141.349	116.317	NO
Atxn7l3b	147.1	136.678	145.26	132.408	124.807	130.278	NO
Matr3	146.946	137.829	124.369	98.9586	121.863	118.949	NO
H2az2	146.932	142.234	153.369	164.659	141.788	135.67	NO
Tmem191c	146.853	142.391	155.094	195.426	159.565	141.331	NO
Txn2	146.738	152.876	149.69	148.085	139.14	132.78	NO
Tceal6	146.71	156.881	154.324	151.885	141.493	141.754	NO
Fam162a	146.541	154.355	163.525	142.698	139.888	139.336	NO
Med28	146.52	139.73	143.264	150.528	131.177	120.631	NO
R3hdm4	146.505	133.616	142.859	154.491	150.672	150.792	NO
Fbxo9	146.505	151.721	137.954	118.516	137.715	143.77	NO
Zc3h15	146.5	135.211	143.649	121.46	115.832	117.451	NO
Psmc6	146.421	139.834	129.603	108.59	125.403	118.391	NO
Dcun1d4	146.363	142.853	120.014	97.9264	106.623	110.354	NO
Elavl3	146.305	155.567	156.268	157.859	137.278	143.051	NO
Septin3	146.242	148.276	150.789	144.928	159.432	148.135	NO
2210016L21Rik	146.212	140.393	148.264	157.092	144.162	136.995	NO
Cryzl1	146.072	139.732	143	149.567	153.978	132.407	NO
Rsl1d1	146.016	136.593	124.449	113.155	128.993	121.892	NO
Pik3r2	145.99	145.726	137.904	144.552	144.579	139.984	NO
Dnajb9	145.887	146.172	126.913	97.9334	132.693	126.579	NO
Acat1	145.731	141.233	132.145	123.355	135.313	123.533	NO
Lin7c	145.704	127.464	121.432	102.589	114.204	113.049	NO
Chmp3	145.597	128.174	132.111	120.779	128.508	128.32	NO
Napg	145.539	132.674	127.812	115.502	120.112	125.501	NO
Ier2	145.467	143.395	78.2161	173.586	64.8855	52.1026	NO
Cacnb1	145.372	132.24	136.586	112.985	116.601	113.171	NO
Dpcd	145.364	144.244	151.668	147.648	135.879	128.636	NO
Nipsnap2	145.116	108.987	133.441	148.46	140.114	135.994	NO
Acat2	145.105	140.819	112.192	125.127	142.077	126.432	NO
Mea1	144.809	137.799	144.571	153.268	131.529	117.235	NO
Slitrk1	144.683	151.888	121.916	94.3907	108.127	120.748	NO
Itpr1	144.652	96.0949	134.033	101.779	122.37	155.848	NO
Trappc6b	144.591	141.104	142.183	126.204	124.546	144.431	NO
Mrpl55	144.571	134.739	149.589	162.694	131.951	129.043	NO
Mink1	144.568	200.519	193.857	189.017	169.682	183.145	NO
Car10	144.5	126.587	140.155	138.601	125.392	140.649	NO
Rap1gap	144.402	143.636	126.893	116.049	133.127	127.215	NO
Syndig1	144.309	117.608	125.84	114.749	104.502	119.011	NO
Slc17a7	144.049	135.028	160.835	153.328	147.449	156.659	NO
Sez6l2	143.922	138.365	145.198	131.364	128.232	150.329	NO
Timm29	143.766	132.799	120.241	115.715	130.745	133.076	NO
ENSMUSG00000095041	143.533	94.1331	167.669	295.902	355.887	336.54	YES
Ddn	143.255	111.041	143.235	191.547	158.607	141.948	NO
Tbcc	143.135	141.512	145.014	160.795	164.614	131.918	NO
Ccnh	143.089	136.108	124.525	102.292	103.973	102.256	NO
Psmb1	143.062	142.699	138.394	146.601	136.542	120.55	NO
Glyr1	143.06	150.21	138.891	117.279	127.126	136.067	NO
Rnf6	143.041	138.869	125.076	98.1798	105.4	114.646	NO
Rpl36	142.932	189.748	130.335	156.967	155.371	184.838	NO
Rab33a	142.898	127.552	124.026	117.52	117.499	126.71	NO
Tomm34	142.867	122.462	131.612	125.414	117.268	132.549	NO
Hdac11	142.845	145.084	133.074	166.839	150.318	129.184	NO
Pnck	142.724	147.382	140.769	198.855	152.296	103.212	NO
Svop	142.669	134.876	146.521	135.923	123.443	120.232	NO
Tmx4	142.654	115.668	117.495	92.5398	112.698	123.465	NO
Api5	142.616	137.368	123.016	98.0685	117.836	118.333	NO
Mrpl20	142.423	131.7	150.059	138.376	121.96	127.027	NO
Map1a	142.228	137.155	141.309	101.031	116.26	167.627	NO
Pip4k2c	142.007	139.305	131.658	120.948	116.345	128.01	NO
Uchl5	141.858	123.1	124.083	107.972	126.978	121.562	NO
Mtln	141.816	129.152	134.344	129.014	138.456	118.408	NO
Rasl10a	141.815	138.192	149.991	134.122	107.737	106.455	NO
Sptbn2	141.738	130.673	139.993	135.937	131.052	144.196	NO
Mmd2	141.691	143.715	147.359	141.59	131.325	138.499	NO
Kif21a	141.674	132.337	137.269	120.157	128.016	131.697	NO
Mrps14	141.378	131.1	140.108	130.718	121.305	108.954	NO
Coro1a	141.359	143.605	131.009	150.708	131.97	112.199	NO
Sdf4	141.215	135.859	128.36	129.593	133.901	146.001	NO
Plcb1	141.157	134.151	118.404	76.9587	90.6085	124.706	NO
Megf9	141.144	97.2307	117.574	101.303	106.318	131.877	NO
Mrtfb	141.113	107.735	132.617	128.233	119.073	122.722	NO
Trbj2-3	141.096	98.3179	74.6491	88.6631	121.219	95.8604	NO
9530068E07Rik	141.09	142.837	143.128	125.221	130.319	123.34	NO
Arhgap26	140.954	117.503	115.217	96.43	117.439	126.134	NO
Atg101	140.947	133.759	139.716	153.887	130.313	106.165	NO
Mcts1	140.826	123.902	132.235	116.148	110.415	124.509	NO
Clpp	140.771	150.945	161.77	161.679	144.801	135.704	NO
Golph3	140.761	171.014	165.321	113.633	130.055	144.355	NO
Rprm	140.743	162.107	95.4242	30.8023	124.686	75.5283	NO
Dync1li1	140.686	102.21	117.977	127.095	127.641	116.113	NO
Kpna1	140.679	117.129	118.625	88.5137	97.2015	111.903	NO
Nudt19	140.659	137.842	130.745	128.547	137.945	128.821	NO
Mapk10	140.653	130.603	127.968	113.735	118.577	129.128	NO
Ndufs3	140.503	142.081	135.589	134.077	132.671	131.247	NO
Chst2	140.344	119.245	174.352	190.613	177.661	174.547	NO
Arpp21	140.341	134.65	143.645	147.124	121.109	128.932	NO
Rps27	140.289	155.964	99.537	148.265	154.394	162.877	NO
Fkbp3	140.241	119.178	123.098	115.339	119.16	131.685	NO
Maea	140.198	148.625	142.488	127.959	126.354	117.41	NO
Cul2	140.142	133.622	121.26	94.7482	106.081	109.927	NO
Vbp1	140.026	131.444	130.895	102.549	118.301	109.634	NO
Btbd10	139.93	126.02	116.039	96.4489	115.38	110.7	NO
Rpl38	139.897	156.211	93.0926	136.7	127.854	162.391	NO
Lypla2	139.826	147.465	156.765	151.318	143.465	137.373	NO
Ddx42	139.744	129.169	119.211	99.2283	111.582	116.625	NO
Mrps21	139.719	122.614	128.982	137.598	121.754	133.781	NO
Pcp4l1	139.716	191.094	123.955	134.842	174.583	176.372	NO
Tsc22d3	139.605	150.813	109.119	100.351	92.2579	110.394	NO
Tm2d3	139.6	132.722	135.255	164.102	138.288	118.822	NO
Yipf4	139.515	116.41	118.709	92.3097	109.824	104.619	NO
Cmpk1	139.421	140.175	145.96	109.591	132.669	128.024	NO
Psma1	139.255	128.335	118.625	117.816	115.062	112.557	NO
Gosr2	138.985	132.348	132.88	141.794	141.586	136.937	NO
Atp6v1h	138.982	117.331	116.413	96.6361	109.408	113.237	NO
Snrnp27	138.882	131.628	140.905	142.731	133.407	128.579	NO
Psmb4	138.842	132.08	131.183	141.613	120.763	114.875	NO
Psma3	138.749	113.505	121.037	118.866	119.938	124.675	NO
Stub1	138.742	143.766	144.76	149.605	134.906	120.702	NO
Slc25a46	138.723	119.714	118.152	85.364	111.617	114.435	NO
Ppp1r1b	138.461	120.005	123.272	85.3371	119.875	139.796	NO
Bcan	138.3	157.309	157.879	131.316	149.89	172.214	NO
Rfk	138.115	129.554	135.439	116.923	139.448	128.035	NO
Tax1bp1	138.047	131.608	126.297	105.302	119.617	111.68	NO
Synpo	137.89	123.49	123.348	120.128	92.1682	107.637	NO
Syp	137.808	50.7099	84.6043	129.091	116.897	125.916	NO
Sptbn1	137.748	123.375	130.628	109.874	116.088	131.51	NO
Ggnbp2	137.657	129.526	123.995	113.12	126.171	120.072	NO
Cnrip1	137.151	139.784	130.883	138.157	124.311	112.787	NO
Ankrd45	137.009	127.448	120.199	100.883	118.742	138.666	NO
Gdpd1	136.968	132.164	122.734	111.337	113.903	109.204	NO
Kcnf1	136.888	170.501	129.126	114.771	96.7652	84.7477	NO
Armc1	136.884	130.967	130.312	110.641	117.062	116.861	NO
Polr3k	136.776	126.388	120.531	116.103	116.614	105.25	NO
Camk1	136.728	127.943	138.588	138.544	109.461	98.0984	NO
Idh3g	136.67	137.871	130.166	121.766	122.294	121.443	NO
0610012G03Rik	136.399	137.756	148.01	136.758	113.04	113.849	NO
Ppp1r9b	136.373	145.898	159.183	203.375	200.795	173.751	NO
Necab1	136.28	109.861	131.741	123.831	122.198	97.2088	NO
Eef1akmt1	136.079	126.963	143.254	130.562	109.298	94.9493	NO
Ube2e3	135.956	129.166	143.827	140.876	125.504	113.315	NO
Mrpl2	135.813	121.075	129.007	137.691	140.737	118.719	NO
Tmed10	135.789	133.212	124.745	119.298	124.57	124.636	NO
Peg3	135.539	131.56	116.993	66.3671	80.9855	130.104	NO
Rps3	135.385	134.718	139.572	147.959	140.616	128.152	NO
Emc6	135.126	127.276	134.497	117.668	113.027	108.992	NO
Wbp11	135.043	130.364	122.45	120.244	125.633	114.083	NO
Psmd8	134.954	123.626	132.428	125.792	116.472	116.703	NO
Oaz2	134.946	135.857	129.387	134.894	131.185	124.442	NO
Atp8a1	134.851	118.008	121.416	78.027	82.3306	111.751	NO
Bbln	134.753	133.587	135.097	143.919	127.837	128.318	NO
Snx17	134.753	125.051	122.757	131.246	130.884	117.337	NO
Nol4	134.665	130.288	128.033	97.8421	87.8104	96.1775	NO
Nmnat2	134.592	148.353	132.333	121.339	123.599	129.345	NO
Dnm1	134.478	359.996	650.906	662.413	656.659	537.219	NO
Micos13	134.475	139.241	140.253	152.775	138.599	129.919	NO
Stoml1	134.41	122.286	124	127.858	125.642	117.333	NO
Fhl2	134.251	130.545	133.613	117.047	121.012	121.859	NO
Ufc1	134.2	123.695	134.66	127.856	126.042	125.02	NO
Commd3	134.11	117.591	130.854	131.076	121.089	113.421	NO
Rexo2	133.998	122.305	128.686	123.038	117.761	107.839	NO
Kcnip3	133.955	135.888	120.507	107.021	130.158	112.436	NO
Map4	133.922	134.349	117.784	102.112	115.835	127.398	NO
Morn4	133.811	137.003	134.467	150.903	134.21	110.174	NO
Rpl41	133.717	156.648	125.544	157.027	133.633	139.126	NO
Ubl3	133.703	157.613	142.044	107.907	132.081	150.562	NO
Hid1	133.664	129.136	126.43	113.713	101.856	106.142	NO
Ube3b	133.485	130.809	131.216	109.057	115.729	147.898	NO
Mrpl36	133.254	132.608	142.517	134.106	116.153	112.222	NO
Tom1l2	133.216	141.098	124.584	107.411	115.417	129.396	NO
Tmem199	133.004	132.95	123.25	134.766	124.453	111.484	NO
Ogfod1	132.998	124.419	120.759	99.7035	100.681	107.112	NO
Tmf1	132.934	98.0847	107.226	88.2894	110.417	125.007	NO
Cops9	132.847	145.376	131.912	143.111	124.744	146.231	NO
Tmod2	132.829	132.244	131.322	108.393	118.261	123.363	NO
Rps5	132.752	140.393	142.513	135.837	131.499	120.028	NO
Ykt6	132.748	131.184	123.878	113.759	119.358	114.536	NO
Fgfr1op2	132.626	116.149	116.41	90.8794	107.923	121.038	NO
Ube2g2	132.594	132.438	124.62	128.431	121.94	114.551	NO
Gas6	132.333	142.609	121.262	106.175	125.277	140.674	NO
Gorasp2	132.261	128.368	125.387	122.036	120.132	109.193	NO
Vps33a	132.245	129.657	117.218	106.731	117.137	121.06	NO
Slc25a39	132.215	133.594	130.379	141.661	136.217	127.298	NO
Sptan1	132.2	115.704	120.615	104.226	105.777	117.566	NO
Rala	132.105	118.271	131.407	120.011	117.242	115.579	NO
Mrpl12	132.057	131.405	137.779	124.163	123.708	118.261	NO
Ankrd34a	132.032	125.518	124.992	112.782	102.074	108.417	NO
Hmgcr	132.019	127.976	106.562	97.3082	80.4815	91.0838	NO
Chchd6	131.983	130.265	130.171	141.005	119.737	112.324	NO
Cops2	131.958	112.61	105.582	88.734	107.361	104.337	NO
Pgam1	131.81	134.152	118.438	112.739	120.04	121.994	NO
Marf1	131.647	94.2332	116.367	130.105	118.803	124.934	NO
Abhd3	131.646	127.71	129.293	109.42	118.525	144.516	NO
Pip4p2	131.51	112.625	113.424	85.1901	97.8621	107.773	NO
Chtop	131.476	127.331	127.342	117.677	117.979	115.158	NO
Eif4g1	131.471	135.199	129.833	95.7877	99.6146	121.089	NO
Slc25a14	131.318	127.216	123.602	106.591	102.411	89.0344	NO
Rbm39	131.223	133.255	132.008	104.487	119.94	131.158	NO
Csrp1	131.186	269.879	290.022	244.682	319.188	341.458	NO
Cry2	131.183	143.324	115.532	113.424	106.009	117.73	NO
Cox14	130.784	127.797	133.622	138.52	120.493	119.386	NO
Mgat2	130.769	131.48	118.077	95.9923	106.25	107.944	NO
Lin7b	130.693	129.476	121.628	133.872	104.882	103.658	NO
Set	130.605	104.97	137.161	156.222	130.48	119.833	NO
Kcnv1	130.586	85.5856	91.5166	77.8184	72.1549	88.2116	NO
Trappc1	130.463	119.001	127.029	119.425	116.227	109.826	NO
Cfap36	130.439	123.831	124.049	108.133	114.805	110.411	NO
Tmem263	130.281	97.088	108.521	96.5033	93.3614	94.6464	NO
Rdh14	130.187	122.794	124.229	105.994	114.306	114.331	NO
Arl6ip4	130.159	129.797	119.967	118.559	127.844	121.609	NO
Dact2	130.144	110.995	121.05	141.326	127.769	126.036	NO
ENSMUSG00000051412	130.112	114.515	109.918	82.2024	110.689	105.526	NO
Ntsr2	130.05	136.307	143.271	148.053	129.702	144.205	NO
S100a16	129.951	124.625	141.58	152.928	154.211	153.058	NO
Nat14	129.741	125.22	127.754	141.072	114.278	99.8469	NO
Jtb	129.626	136.513	139.485	136.439	125.729	115.49	NO
Arglu1	129.584	80.4554	104.715	101.404	99.7124	129.622	NO
Anapc2	129.559	131.928	118.075	121.1	125.161	109.727	NO
Sars	129.54	106.508	115.407	110.385	112.391	108.792	NO
Ube2g1	129.527	120.163	110.684	93.5452	104.782	108.76	NO
Abcg1	129.506	101.069	102.792	110.388	119.189	120.695	NO
Sat1	129.274	103.241	122.708	148.191	112.255	137.599	NO
Phyhipl	129.259	136.753	118.626	100.407	107.565	113.526	NO
Chp1	129.179	134.14	125.631	100.707	117.917	116.951	NO
Rit2	128.994	116.135	109.856	107.625	117.261	102.36	NO
Amph	128.833	126.633	124.19	108.472	109.266	110.355	NO
Mat2a	128.827	153.455	122.187	94.2805	97.9313	107.001	NO
Psmb5	128.72	136.935	139.175	123.949	111.096	103.378	NO
Mgrn1	128.69	149.833	146.221	142.763	144.872	136.834	NO
Ube2h	128.633	123.817	112.129	111.4	106.083	109.31	NO
Tspan12	128.572	105.814	104.951	76.1395	110.526	125.956	NO
Scd1	128.561	116.75	126.121	57.7493	106.262	154.908	NO
mt-Tr	128.34	116.068	93.3436	312.541	208.667	213.806	NO
Ndn	128.159	155.861	133.502	227.813	222.402	167.907	NO
Ica1	128.158	121.908	108.047	99.786	114.031	111.596	NO
Sptssa	128.123	124.717	131.041	112.468	132.675	123.036	NO
Ptpa	128.086	130.873	128.651	143.944	139.147	122.335	NO
Opcml	128.015	115.428	114.385	87.043	95.1916	124.624	NO
Syf2	127.985	125.079	129.225	136.328	152.636	130.668	NO
Vgf	127.979	148.253	183.61	132.782	139.741	145.204	NO
Leprotl1	127.787	135.648	133.591	101.757	111.561	119.8	NO
Gm1673	127.74	148.313	121.412	142.868	100.294	121.867	NO
Ly6h	127.55	139.845	147.134	196.781	142.626	108.9	NO
Isca2	127.46	126.259	123.62	144.058	126.931	122.12	NO
Ptma	127.294	145.479	134.588	98.7056	121.656	117.192	NO
Adora1	127.289	134.094	105.407	78.976	104.937	116.245	NO
Hepacam	127.257	120.57	121.404	116.015	137.042	147.089	NO
Mpc1-ps	127.077	114.926	122.905	110.302	114.328	133.527	NO
Ssr2	126.959	125.103	127.956	126.553	114.48	97.4375	NO
Tmub2	126.794	116.886	119.254	119.403	115.443	118.739	NO
Smu1	126.748	128.3	116.826	106.2	114.932	106.996	NO
Pde6d	126.609	120.621	122.944	132.568	120.449	103.981	NO
Nap1l3	126.483	118.146	106.179	82.5284	99.1777	98.6705	NO
Tspan17	126.472	109.492	137.124	139.032	114.243	121.759	NO
Sdc4	126.378	87.2491	108.047	134.384	131.847	134.538	NO
Marcks	125.967	105.743	126.824	100.914	96.3814	94.5421	NO
Fxyd6	125.951	139.838	134.485	152.784	130.349	72.2979	NO
Nap1l1	125.822	115.309	111.826	99.5731	107.704	105.746	NO
Rpl8	125.766	139.61	142.731	143.253	129.825	131.752	NO
Tmem183a	125.678	123.382	113.197	115.804	117.032	105.342	NO
Ciart	125.52	154.319	41.2534	74.6785	75.1137	80.2299	NO
Slc9a6	125.5	124.055	114.821	87.3385	103.997	115.128	NO
Tmem25	125.231	108.214	109.224	94.5711	98.1119	128.759	NO
Cfap418	125.19	115.534	113.702	88.4937	95.1357	93.9226	NO
Twf1	125.141	87.2975	96.4156	106.999	105.421	111.837	NO
Mir22hg	125.121	107.616	103.333	96.3029	113.768	108.001	NO
Ripor1	125.12	143.647	119.839	95.3241	99.1775	101.982	NO
Rpl3	124.977	126.359	115.511	128.994	139.2	120.009	NO
Pygb	124.958	139.12	129.171	113.805	122.666	136.093	NO
Dnaja3	124.957	123.515	113.798	97.6989	107.043	109.407	NO
Csnk1d	124.89	153.06	142.09	123.678	128.1	129.217	NO
Kpna3	124.889	120.531	106.306	78.6252	95.1003	101.507	NO
Gtf2h5	124.835	109.308	116.596	113.185	108.54	109.545	NO
Pnkd	124.801	112.239	112.775	113.221	122.986	131.114	NO
Alcam	124.735	124.51	139.943	93.2787	100.418	97.8751	NO
Ccdc47	124.684	122.558	107.901	89.0251	107.457	112.726	NO
Taldo1	124.616	136.26	127.355	121.475	123.675	116.01	NO
Ube2a	124.564	118.337	117.621	90.0279	85.3042	90.0801	NO
Rps6	124.559	131.391	130.646	120.232	119.982	113.459	NO
Uri1	124.541	126.111	123.106	110.258	139.852	146.092	NO
Pgam5	124.42	122.89	128.346	106.335	119.265	107.36	NO
Psmc2	124.356	125.524	114.04	114.875	120.205	99.7664	NO
Ahsa1	124.319	122.922	119.552	125.413	118.74	103.048	NO
Cnot7	124.262	105.971	106.806	89.703	104.591	104.402	NO
Lsm4	124.258	134.101	132.25	142.531	128.857	118.84	NO
Reps2	124.228	67.5725	96.3392	68.532	82.2708	94.0289	NO
Psmd1	124.135	132.145	110.855	91.8016	105.907	108.343	NO
Cadm3	124.113	127.759	126.032	119.379	106.687	108.967	NO
Rab40b	123.951	115.008	105.975	113.15	89.1792	97.5233	NO
Msmo1	123.928	104.036	111.435	105.876	103.192	104.046	NO
Sez6l	123.889	134.89	120.361	83.1023	87.3979	102.256	NO
Crcp	123.851	109.421	118.171	128.679	116.379	115.436	NO
Kifbp	123.811	262.896	257.257	213.812	215.201	238.145	NO
Tmem9	123.734	129.687	120.645	129.307	126.377	95.5908	NO
Abcf3	123.692	118.001	106.403	108.277	115.405	106.305	NO
P2ry12	123.667	114.982	120.977	108.01	127.579	133.581	NO
Trir	123.643	145.23	171.154	168.968	146.091	141.842	NO
Sri	123.641	109.346	111.995	116.499	120.899	104.669	NO
Synpr	123.57	104.424	120.154	119.558	90.3825	83.6971	NO
Egr3	123.346	134.722	198.293	189.373	134.261	115.822	NO
Egln2	123.297	128.603	120.3	129.37	125.001	121.902	NO
Taok1	123.294	88.9926	104.421	107.635	108.959	113.692	NO
Fau	123.246	125.114	115.867	130.004	113.658	123.475	NO
Atraid	123.193	107.917	117.297	115.276	108.991	110.494	NO
Tpd52l1	123.106	118.772	126.204	128.158	112.905	96.4521	NO
Mkrn1	123.093	162.031	150.867	139.506	152.789	144.489	NO
6430548M08Rik	123.055	130.796	122.228	125.358	114.444	126.572	NO
Atg4c	123.046	109.476	105.271	85.9529	94.8628	109.468	NO
Fbxo21	123.007	131.099	112.763	106.365	114.637	110.768	NO
ENSMUSG00000095280	122.992	115.446	198.577	948.143	980.909	446.199	YES
Acsl4	122.964	51.7154	93.0325	75.0785	78.8585	85.4348	NO
Dpy30	122.933	121.464	133.68	118.443	118.345	105.494	NO
Nedd4	122.927	128.857	119.1	85.7741	97.8877	109.237	NO
Prkcz	122.65	123.414	116.692	113.033	111.945	117.997	NO
Bax	122.473	99.9651	113.385	124.944	114.95	108.644	NO
Rap1gap2	122.452	121.56	118.62	103.979	105.849	123.936	NO
Epm2aip1	122.293	114.504	103.513	65.0105	78.3244	97.1024	NO
Tex264	122.291	120.227	114.246	129.798	115.889	101.642	NO
Ssr3	122.25	120.093	116.453	88.9928	103.826	111.462	NO
Cby1	122.2	128.21	125.279	128.032	114.474	110.289	NO
Pdcd4	122.197	99.8532	136.717	166.858	143.221	135.489	NO
Gtf2a1	122.056	64.6445	95.6537	91.8316	96.3183	103.325	NO
Frrs1l	122.051	105.043	125.037	115.869	118.014	115.742	NO
Creb3	121.988	109.502	110.485	120.834	114.029	99.3426	NO
Adprh	121.784	124.55	120.64	112.431	110.848	103.73	NO
Romo1	121.684	126.789	103.982	134.552	115.001	124.862	NO
Elp3	121.608	121.588	105.791	107.64	113.549	108.82	NO
Tor1a	121.407	120.227	113.46	125.011	120.801	102.195	NO
Pmpca	121.386	110.784	106.251	92.4103	105.654	114.841	NO
Rpn2	121.373	132.28	127.35	114.238	118.139	110.777	NO
Atp1b3	121.357	133.522	139.691	100.904	133.108	145.168	NO
Trap1	121.312	113.178	107.792	95.9247	103.54	107.317	NO
Jkamp	121.17	112.44	114.017	100.539	99.7391	102.24	NO
Hdac3	121.028	118.329	119.524	115.189	116.235	115.01	NO
Tbca	121.026	119.691	123.899	107.863	100.908	105.08	NO
Rmnd5b	120.997	126.17	122.069	126.384	119.259	101.331	NO
Fsd1	120.977	117.632	115.48	129.288	135.144	112.824	NO
Caml	120.96	115.526	120.394	112.535	115.009	105.847	NO
Rab4a	120.887	127.704	109.664	118.755	128.964	108.718	NO
Mpv17l	120.785	97.0494	93.076	77.0404	92.4718	103.539	NO
Cbx5	120.714	114.077	113.269	97.6925	105.464	106.622	NO
Nlgn3	120.662	105.232	101.815	98.6363	95.6509	98.447	NO
B230219D22Rik	120.575	112.064	106.796	89.4018	101.128	100.947	NO
H2ax	120.546	114.648	111.936	114.11	103.557	93.0898	NO
Acvr1b	120.522	126.399	104.466	84.2768	94.8327	108.673	NO
Ndufaf1	120.437	115.203	119.552	101.069	114.025	107.143	NO
Oip5os1	120.271	73.6615	85.5764	81.54	102.023	111.837	NO
Slc2a3	120.207	128.675	114.012	97.0629	93.3553	84.4837	NO
Phlda3	120.173	124.462	120.142	131.88	128.763	117.504	NO
Fnta	120.15	120.674	119.334	116.093	125.771	111.392	NO
Dctn6	120.093	104.693	112.221	116.061	112.347	100.665	NO
Ddx56	120.051	113.751	116.884	117.558	118.593	105.391	NO
Hnrnpdl	120.02	112.799	105.015	94.6564	115.451	124.929	NO
Kat2a	119.983	115.079	110.365	106.824	105.096	105.474	NO
Rad23a	119.98	30.7067	67.0877	96.2314	94.6716	92.2645	NO
Rab3c	119.858	111.579	106.341	98.942	102.591	87.268	NO
Cnksr2	119.821	116.007	115.639	105.179	97.8643	105.187	NO
Nudt4	119.73	174.923	197.938	145.548	187.403	206.672	NO
Osbpl2	119.674	116.235	105.681	104.238	113.778	103.69	NO
Dda1	119.671	127.821	131.359	139.574	118.961	105.471	NO
Acap3	119.506	125.821	112.032	105.78	114.196	116.192	NO
Celf1	119.351	127.83	117.059	98.8592	101.53	110.804	NO
Vcp	119.297	125.195	104.5	88.2274	96.2767	102.362	NO
Trappc4	119.275	108.373	120.216	122.175	114.226	101.678	NO
Mrpl46	119.267	117.641	117.77	108.457	115.125	97.6105	NO
Exoc7	119.257	113.651	106.819	109.863	108.584	94.4738	NO
Akap11	119.256	95.7643	111.099	80.4822	96.6038	111.908	NO
Zcrb1	119.202	109.371	121.441	116.044	117.008	118.531	NO
Gdap1l1	119.138	109.216	111.627	115.507	111.317	102.647	NO
Acox1	119.116	122.348	114.42	99.1428	106.099	120.486	NO
Pdxk	119.114	124.951	118.068	116.831	118.127	110.387	NO
Ccng1	119.051	112.045	105.959	81.1099	104.577	110.022	NO
Cyria	118.981	98.9211	97.4443	71.9278	84.6444	87.0387	NO
Bag5	118.943	121.588	128.644	118.776	126.485	117.5	NO
Tcp1	118.927	121.902	108.588	91.1804	99.8483	96.1399	NO
Ddrgk1	118.887	115.782	116.668	120.912	134.96	124.448	NO
Cct2	118.88	123.988	115.324	111.357	107.242	98.2347	NO
Supt4a	118.874	110.663	110.78	101.588	95.7493	92.3665	NO
Fmc1	118.768	139.694	125.695	138.21	126.279	136.185	NO
Gcsh	118.436	113.083	115.554	109.536	115.011	112.758	NO
Ube2w	118.397	107.263	111.947	95.2687	94.9571	94.3243	NO
Ybx1	118.22	166.044	165.731	137.46	146.587	146.126	NO
Ubap1	118.179	114.317	100.797	102.41	110.916	99.3518	NO
Emc7	118.144	109.363	108.192	91.0368	100.725	104.639	NO
Serpine2	118.071	124.419	121.279	121.06	122.525	130.056	NO
Rrn3	118.064	94.4781	101.603	103.795	103.295	104.274	NO
Atg3	117.867	110.009	113.756	103.086	113.134	100.916	NO
Praf2	117.825	113.219	102.842	97.3374	93.4012	89.62	NO
Nr1d2	117.74	110.006	81.2089	53.4235	86.1617	97.3018	NO
Crmp1	117.682	120.279	106.575	91.1553	87.4995	85.5524	NO
Fto	117.671	124.283	107.244	105.065	113.278	112.687	NO
Banf1	117.582	109.97	123.26	117.497	99.1131	100.549	NO
Sox9	117.533	105.799	116.819	114.778	123.907	140.019	NO
Hnmt	117.504	107.311	94.4463	82.7706	99.4866	89.7731	NO
Pqbp1	117.496	126.059	128.691	130.122	114.365	97.7549	NO
Gmps	117.311	91.2207	95.3442	73.7833	84.956	87.5517	NO
Asah1	117.251	109.849	113.453	89.0858	103.116	113.355	NO
Minpp1	117.239	117.911	109.554	89.8424	93.7055	93.1836	NO
Csnk1a1	117.106	117.152	114.456	103.141	110.739	112.37	NO
Comt	116.965	125.496	126.193	115.239	114.556	111.351	NO
Eif3b	116.964	191.34	189.861	190.27	197.504	173.872	NO
Tob1	116.906	96.0505	76.0318	99.8675	87.9767	85.5397	NO
Actr10	116.824	87.2202	89.7737	94.6376	97.2153	93.9565	NO
Lztr1	116.808	111.274	109.625	97.2629	101.319	102.778	NO
Tuba1b	116.785	120.597	119.345	108.464	106.416	104.322	NO
Cnpy3	116.664	114.722	114.137	114.151	114.504	103.635	NO
Snx10	116.593	114.857	105.627	89.2761	97.2213	88.664	NO
Tpm3	116.562	114.832	112.197	122.725	114.044	105.055	NO
Ndufs5	116.37	113.944	109.959	115.917	104.367	107.546	NO
Snrpd3	115.974	115.128	113.677	100.805	113.926	109.238	NO
Cggbp1	115.921	120.25	108.153	76.9116	86.303	87.9462	NO
Rtl8b	115.915	112.402	117.275	101.693	98.3883	103.758	NO
Nefm	115.907	104.788	112.029	68.9038	102.424	142.069	NO
Ipo9	115.762	104.456	105.008	89.4368	97.3161	118.167	NO
Grsf1	115.579	109.457	104.854	91.0807	107.821	109.848	NO
1700086L19Rik	115.553	101.548	112.386	131.946	86.7681	69.1829	NO
Nipsnap1	115.521	110.86	113.146	99.8658	101.067	102.38	NO
Grm5	115.463	111.114	110.617	72.8438	78.6721	93.7415	NO
Rabif	115.439	107.374	104.612	92.3015	88.9648	90.1029	NO
Hgsnat	115.26	108.053	107.192	81.0385	98.6127	108.622	NO
Cops4	115.06	108.194	104.617	100.155	102.019	90.2561	NO
Usp2	115.057	121.862	82.596	102.967	102.598	116.897	NO
Gabrb2	115.05	104.129	89.9565	50.7522	68.7468	94.4988	NO
Actg1	115.045	134.548	109.606	90.3391	88.3518	97.6997	NO
Lxn	114.617	116.3	131.054	119.91	120.79	116.361	NO
Gabrb3	114.483	179.417	216.036	161.392	172.02	164.097	NO
Tspyl5	114.357	97.2359	93.6316	82.8373	83.3054	103.163	NO
Mn1	114.319	102.827	103.598	128.771	99.9622	91.194	NO
Usp11	114.297	114.805	105.491	97.0466	86.5408	80.6636	NO
Rfng	114.25	118.068	108.49	123.41	116.403	112.017	NO
Rpl26	114.203	110.452	110.265	117.175	113.27	110.133	NO
Vta1	114.141	109.069	111.766	108.494	104.065	95.4297	NO
Mfge8	114.136	127.33	121.288	103.31	117.728	120.819	NO
P4htm	114.097	114.807	110.68	121.373	117.856	99.5896	NO
Nrsn2	114.04	129.835	119.043	107.17	109.315	112.606	NO
Igsf21	114.027	152.535	99.2107	91.0752	117.943	70.2443	NO
Pnrc2	114.005	117.231	114.729	114.341	98.0163	99.0514	NO
5730455P16Rik	113.971	112.261	102.206	84.3174	94.4339	103.014	NO
Extl3	113.9	114.978	110.386	87.5363	87.0634	116.006	NO
Gsta4	113.876	103.23	141.149	146.449	117.206	104.063	NO
Trp53i11	113.861	117.696	138.808	144.785	115.51	89.5	NO
Sh3bgrl	113.82	98.2437	90.0979	74.8375	89.7836	82.7079	NO
Srebf2	113.671	124.888	117.391	103.853	110.041	116.087	NO
Dctn2	113.623	114.302	114.358	104.832	100.383	98.1694	NO
Rtca	113.58	116.35	116.052	99.8684	106.016	111.123	NO
M6pr	113.475	114.866	108.434	108.296	111.287	104.247	NO
Prmt1	113.306	108.547	104.473	126.709	117.735	92.9636	NO
Ik	113.183	106.258	103.64	97.4553	107.479	99.6025	NO
Dnajb11	113.164	106.208	111.372	96.7362	96.1266	81.0784	NO
Tomm7	113.138	117.171	85.014	108.234	101	116.012	NO
Rnf181	113.062	111.247	111.72	103.87	97.3032	98.3463	NO
Fbxo31	112.905	148.48	139.885	132.433	145.108	152.577	NO
Cops8	112.83	110.106	109.977	99.5736	98.5454	96.3489	NO
Dnaja1	112.801	114.095	97.9076	87.2238	91.7028	90.3614	NO
Sez6	112.653	139.519	94.5884	72.353	82.3011	73.0937	NO
Cracdl	112.625	183.958	183.473	173.595	161.904	159.459	NO
Clybl	112.162	106.335	106.837	120.183	110.452	107.035	NO
Apmap	112.126	97.5623	89.9917	82.5026	92.9158	91.0634	NO
Prkaca	112.018	314.261	535.75	591.388	490.556	313.126	NO
Nt5c3	111.926	103.9	98.6974	97.7753	102.541	89.7854	NO
Coq2	111.914	151.213	144.318	143.954	142.021	140.436	NO
Alg11	111.877	60.8397	76.6959	75.8724	89.4152	86.8992	NO
Psma2	111.827	102.669	103.628	94.0501	98.5552	96.6738	NO
Pfkp	111.8	109.531	98.262	84.5176	85.4039	88.2529	NO
Kcna1	111.774	127.183	113.367	56.7688	96.188	150.231	NO
Gstp1	111.729	120.247	111.405	124.473	109.426	103.384	NO
Negr1	111.7	111.243	93.9119	57.9829	61.3316	79.4122	YES
Grb2	111.668	114.242	125.919	126.358	126.555	114.292	NO
Hp1bp3	111.619	110.56	106.562	97.1458	103.512	102.753	NO
Rab5b	111.505	106.162	98.0304	104.142	110.492	106.087	NO
Scamp3	111.492	106.385	108.436	105.677	96.718	90.0609	NO
Cers1	111.445	123.707	106.09	110.568	90.0148	91.8045	NO
Arl2bp	111.155	239.609	323.208	326.191	323.704	265.902	NO
Rtf2	111.153	108.239	108.274	100.632	104.753	101.728	NO
Mtmr7	111.151	105.977	89.1529	67.3035	87.9416	93.6579	NO
Ube2ql1	111.135	111.855	121.624	124.708	111.435	106.233	NO
Copa	111.007	109.776	99.5026	77.2744	87.9889	101.338	NO
Efna5	111.006	96.4766	109.584	129.533	117.443	126.538	NO
Gfra4	110.826	107.283	107.881	114.707	100.189	95.5135	NO
Map6d1	110.61	110.345	96.693	71.024	79.2433	117.599	NO
Wasf3	110.509	124.163	98.3199	96.8278	108.97	112.629	NO
Rpl35	110.508	116.378	98.7401	120.825	118.504	110.756	NO
BC005624	110.506	107.845	101.252	98.1592	101.678	97.0732	NO
Arhgap1	110.423	112.788	111.106	95.171	94.2997	88.0308	NO
Ano3	110.387	86.6393	87.0884	47.4685	66.32	98.0008	NO
Pias1	110.286	96.1384	95.3751	74.3537	87.545	93.8416	NO
Mbnl2	110.277	109.98	104.64	78.0017	91.0281	104.619	NO
Pkig	110.271	123.464	132.631	149.348	124.854	110.632	NO
Nrbp1	110.25	99.5063	97.0026	100.494	107.924	93.2657	NO
Hsdl1	110.221	118.851	105.255	99.0891	106.935	98.1816	NO
Ssrp1	110.215	108.893	108.849	96.0841	99.3398	102.141	NO
Tomm22	110.181	109.703	114.229	93.8781	95.138	94.9023	NO
Baiap2	110.138	104.247	121.914	103.635	82.8928	86.9247	NO
Myl6	110.068	107.39	113.456	105.113	102.16	97.3793	NO
Pno1	110.039	99.5167	105.076	84.5251	91.4169	88.3233	NO
Insig1	109.968	85.0038	77.2868	79.8736	84.8878	110.572	NO
Emc3	109.967	109.79	107.038	96.9814	102.599	98.1278	NO
mt-Tw	109.956	111.681	128.457	250.61	213.423	203.644	NO
Sqle	109.824	121.834	97.7282	95.633	89.1502	91.5507	NO
Mrpl42	109.799	97.1844	103.55	104.408	101.869	95.5263	NO
Creg2	109.748	103.461	100.076	70.3818	80.6316	92.3928	NO
Spag7	109.74	99.2465	99.7318	99.6472	106.65	97.1774	NO
Ttr	109.708	31.8913	51.2513	109.102	106.934	43.9427	NO
Wdr6	109.664	125.129	96.7028	87.4083	90.4426	82.8503	NO
Tubg2	109.591	110.8	108.564	111.595	109.054	102.528	NO
Cmip	109.535	123.365	126.117	103.263	96.2265	102.126	NO
Srrm1	109.457	121.516	122.956	103.841	98.1349	122.256	NO
Klhl7	109.417	108.172	96.3867	64.6263	79.2664	81.9216	NO
Il33	109.294	134.041	99.7915	95.5705	148.337	194.494	NO
Mdp1	109.212	104.62	105.676	105.399	107.126	98.1326	NO
Pttg1	109.202	102.758	122.106	109.845	95.2556	102.834	NO
Cadm2	109.191	101.039	98.1283	69.4649	78.6976	104.951	NO
Usp14	109.129	97.5024	91.3774	70.7467	80.351	85.3554	NO
Cycs	109.011	101.267	92.9811	92.4793	102.563	96.1654	NO
Rap1b	108.938	224.16	240.606	217.045	233.034	193.776	NO
Ubb-ps	108.913	96.0755	93.7615	109.937	105.134	81.8376	NO
Sccpdh	108.813	96.5104	115.877	114.546	78.7798	79.1378	NO
Ndufb5	108.801	104.041	108.487	99.0125	101.407	98.336	NO
Cbx6	108.799	112.366	117.784	102.997	104.894	114.567	NO
Adam10	108.772	96.2217	93.2834	71.9856	85.5019	91.7824	NO
Phax	108.649	109.418	103.614	101.361	101.187	94.9332	NO
Prickle1	108.644	108.494	89.9285	57.9662	74.6295	86.6384	NO
Pigs	108.581	113.403	104.27	111.268	98.3841	87.2428	NO
Surf4	108.572	119.965	113.714	104.607	106.709	97.8276	NO
Gfap	108.261	146	138.801	262.257	277.047	148.056	NO
Lrrc57	108.148	93.3423	108.983	79.7203	91.9176	99.5837	NO
Polr2d	108.091	98.5631	96.4532	102.149	89.188	79.2225	NO
Hnrnpc	108.042	105.561	107.483	96.8256	98.7206	90.1269	NO
Sbf1	107.893	118.629	102.492	100.2	96.7652	101.908	NO
Drosha	107.878	111.137	98.8272	98.6634	94.3899	96.0273	NO
Matk	107.764	93.9115	100.955	120.614	112.82	113.225	NO
Babam1	107.545	105.91	100.115	108	108.989	97.7529	NO
Gm2a	107.545	101.061	102.603	110.903	112.26	122.433	NO
Hmox2	107.511	98.5255	96.7126	98.458	107.862	89.2376	NO
Cd164	107.455	109.068	98.0067	74.637	94.6663	94.8944	NO
Pde4a	107.417	112.919	102.298	82.2315	90.022	101.216	NO
Tmem198	107.41	102.788	115.918	124.312	96.2895	85.441	NO
Ak3	107.345	114.394	107.41	98.9027	107.562	107.894	NO
Trbc2	107.279	95.0954	93.746	87.046	98.2325	86.7869	NO
Npm1	107.215	99.8862	97.6518	90.1899	107.56	93.7082	NO
Tmem223	107.127	118.261	121.534	124.012	105.73	105.856	NO
Tmeff2	107.053	109.44	93.098	88.2172	89.8393	73.8688	NO
Sc5d	106.911	110.275	102.829	78.4722	83.9316	100.322	NO
Scrg1	106.863	104.112	113.423	69.7803	100.253	108.642	NO
Thrb	106.848	102.432	100.505	107.521	99.2971	84.4934	NO
Armcx1	106.842	104.693	95.414	73.0638	87.7369	96.4842	NO
Sfxn5	106.67	73.4054	94.0272	146.655	114.618	120.055	NO
Rab14	106.6	99.4693	101.676	93.7172	91.7825	93.0234	NO
Rilpl1	106.437	104.999	122.259	125.666	109.861	96.8982	NO
Dzank1	106.288	82.3164	92.699	69.1693	81.7706	99.6815	NO
Gng4	106.281	143.165	99.9164	111.97	93.2981	77.0805	NO
Hnrnph2	106.205	98.4428	90.8627	75.7887	86.6566	90.8212	NO
Wdr1	106.194	109.217	96.2911	94.7108	96.9547	95.8765	NO
Gng12	106.17	101.331	98.7747	85.3006	107.784	100.173	NO
Mageh1	106.105	112.824	113	96.7664	96.6551	99.067	NO
B4galt5	106.078	87.726	93.9474	102.564	93.1178	83.4365	NO
Appbp2	106.027	107.133	94.9649	69.819	85.164	94.0484	NO
Krt222	106.006	97.5198	81.798	66.0213	94.5582	104.805	NO
Nucks1	106	93.762	95.9339	81.0274	94.8075	95.9994	NO
Mrps18c	105.966	87.355	88.7855	102.796	100.999	95.311	NO
Gng2	105.955	102.478	96.7017	91.608	100.048	86.3107	NO
Tvp23b	105.885	105.712	96.2707	89.3118	93.6064	83.2648	NO
Tbpl1	105.855	98.2399	88.8353	79.8347	85.447	82.741	NO
Bpnt1	105.826	92.4202	96.0691	88.7254	96.0311	93.4237	NO
Atp5e	105.723	109.098	91.4083	99.0303	90.702	104.322	NO
Ctsz	105.474	116.728	102.954	121.493	145.413	126.738	NO
Idh1	105.445	109.234	100.012	81.8245	98.2452	91.8993	NO
Rwdd2a	105.291	113.272	95.0312	76.2371	93.2566	82.5812	NO
Gng13	105.275	124.514	82.5309	130.634	106.011	117.914	NO
Akap8l	105.185	88.9842	91.1259	128.482	109.453	114.394	NO
Camk1g	105.123	107.517	99.4719	101.502	91.3767	65.0187	NO
Pitpnm1	105.101	115.785	110.215	109.736	108.931	118.757	NO
Kcnip4	105.058	101.654	94.6204	86.6315	90.9194	88.2486	NO
Inka2	105.042	96.0269	102.947	90.698	84.3425	86.7375	NO
Pdrg1	104.942	103.592	112.691	118.044	112.831	108.175	NO
Ssu72	104.909	99.6046	105.302	103.14	89.6649	89.7525	NO
Fam168b	104.892	119.863	161.013	136.025	130.881	125.702	NO
Ggps1	104.841	101.003	89.0785	80.9321	92.9633	100.016	NO
Qk	104.768	91.2021	89.0452	64.1425	96.7495	127.432	NO
Plpp7	104.722	99.1967	94.1217	90.07	102.055	89.8787	NO
Prmt2	104.623	116.175	119.833	138.464	97.795	74.7896	NO
Swi5	104.58	97.202	104.927	100.37	93.3699	90.5012	NO
Rnf167	104.532	98.7943	96.274	95.7532	100.733	103.02	NO
Gm20300	104.444	66.3877	93.1964	75.6395	83.2316	98.1175	NO
Gtf2i	104.416	105.728	99.4602	84.7685	88.7703	98.9197	NO
Tmem127	104.364	100.158	95.8649	86.8376	95.1567	96.4947	NO
Snx6	104.342	103.117	104.389	93.9193	101.63	98.1839	NO
2310011J03Rik	104.129	100.264	107.191	117.775	104.525	97.3912	NO
Camk4	104.089	92.4056	89.2614	45.2525	56.3644	92.517	NO
Asrgl1	104.055	99.8538	100.547	100.204	102.495	114.544	NO
Gpcpd1	104.041	88.1297	76.0855	53.933	72.6308	105.408	NO
Nxt2	104.025	91.0444	90.0359	75.7898	98.6352	94.477	NO
Ppm1l	103.675	114.689	93.1712	74.3712	85.5353	104.709	NO
Crbn	103.648	92.225	87.1815	66.5462	83.8432	85.9201	NO
Sec14l1	103.642	113.1	77.5685	85.4296	92.0763	92.6521	NO
Ppm1k	103.628	69.5145	67.4936	79.475	85.1904	81.4542	NO
Gnptg	103.613	107.561	108.396	104.001	102.952	96.8194	NO
Zbtb38	103.573	73.4975	77.7917	62.4672	74.7174	86.8923	NO
Ufd1	103.563	91.1309	90.3633	110.865	112.253	98.1928	NO
Acyp2	103.358	82.7852	99.1055	74.5602	76.3464	86.826	NO
Rnf114	103.309	101.433	97.9975	97.1958	102.194	99.9069	NO
Gjb6	103.294	104.15	121.865	108.197	124.557	121.582	NO
Gprc5b	103.131	123.09	113.717	109.76	127.266	142.296	NO
Ssx2ip	103.112	114.948	121.312	109.339	116.673	115.778	NO
Pef1	103.1	88.799	99.3803	87.9261	85.6984	89.0609	NO
Gda	103.032	118.202	93.9341	79.3024	78.8047	79.5505	NO
Ntrk2	102.952	117.278	103.272	88.8309	89.6346	99.9299	NO
Ap2m1-ps	102.941	90.1983	87.1846	97.3103	99.5673	77.2941	NO
C1qc	102.774	102.555	109.867	166.794	118.767	123.131	NO
Suclg1	102.734	101.947	104.087	97.9379	103.396	95.8742	NO
Dnajc27	102.647	111.93	95.2342	87.3717	100.331	102.539	NO
Eif1a	102.571	90.9677	84.636	74.429	81.0183	77.1697	NO
Eid1	102.548	84.3168	125.587	124.987	127.363	114.284	NO
Chrm1	102.489	103.955	97.1012	86.6658	84.035	85.563	NO
Rps29	102.382	137.408	53.8688	125.043	109.519	121.843	NO
Ptprs	102.376	114.995	113.015	91.4675	87.9446	104.235	NO
Atg13	102.156	102.384	93.6913	83.1447	88.1621	90.9701	NO
Fam216a	102.152	102.354	96.7312	96.016	100.248	82.6692	NO
Hspa4	102.145	109.325	89.2304	61.4494	73.9998	87.8836	NO
Smarcd1	102.135	131.602	115.332	96.3907	103.711	118.893	NO
Kcnj9	102.132	103.649	96.6937	95.2384	89.4478	90.7633	NO
Srxn1	102.126	116.423	180.067	151.895	151.107	126.59	NO
Elp5	102.124	101.295	104.722	98.0707	93.0689	88.2899	NO
Il34	102.115	92.2462	102.31	89.3677	84.3351	74.7293	NO
Polr2e	102.005	100.928	102.223	100.839	91.1269	86.7889	NO
Emc2	101.993	97.7657	101.355	101.237	92.7042	82.4672	NO
Sdf2	101.968	94.0444	100.339	101.453	83.4945	78.3967	NO
Actr6	101.965	91.9568	90.4387	79.4042	85.1448	77.0396	NO
Elp2	101.944	102.877	93.6804	76.3521	84.3365	85.9984	NO
Surf1	101.895	99.3441	96.7199	120.165	112.128	94.6118	NO
Gpr22	101.853	90.1338	77.7918	65.2581	86.1245	70.8447	NO
Pum1	101.832	101.529	90.4459	68.1685	74.2026	84.6596	NO
Trp53inp2	101.762	111.471	97.7185	77.6835	80.4509	108.752	NO
Cdc16	101.761	97.2494	93.1249	88.5465	85.5713	81.9586	NO
B4galnt1	101.723	92.8272	91.7285	84.9535	83.9133	86.3872	NO
Tpd52	101.547	96.8611	102.74	104.214	112.683	99.7078	NO
Insig2	101.526	100.996	104.082	81.8854	91.5305	83.5961	NO
Mff	101.398	98.7091	92.9728	78.211	81.9353	83.938	NO
Brms1l	101.333	86.5998	91.9822	78.1659	77.7764	79.0467	NO
Lrrn2	101.265	113.479	119.403	102.917	113.055	97.7447	NO
Jun	101.22	113.044	84.6423	65.8708	44.2532	54.7086	YES
Psmb3	101.217	93.945	99.5839	98.3765	96.8912	84.7531	NO
Ciao2a	101.091	97.4592	96.2169	91.2836	90.5684	91.8146	NO
Coa6	101.05	98.5223	103.694	91.9544	78.6309	83.2415	NO
Ccdc32	100.9	95.3256	101.606	90.9544	86.1975	89.0049	NO
Hmgb1	100.861	93.3187	87.7923	80.9285	90.0894	83.4492	NO
Cipc	100.754	107.223	93.6231	74.0296	88.1226	96.8657	NO
Vps52	100.711	101.442	94.6736	87.7311	87.397	86.2389	NO
Raly	100.704	110.161	100.033	104.115	98.7682	91.4197	NO
Ergic1	100.702	99.999	97.2333	94.2732	94.1788	88.4203	NO
Septin4	100.57	107.351	86.6284	62.8164	122.185	131.417	NO
Gpr180	100.464	90.4748	84.0578	84.7294	81.0149	79.1508	NO
Ddah1	100.335	108.884	98.4799	88.3515	90.3875	91.3959	NO
Capns1	100.253	201.9	214.991	220.19	213.418	201.054	NO
Rnf44	100.245	118.127	117.137	104.508	100.903	112.074	NO
Gprasp2	100.233	106.814	94.1228	81.65	98.3171	91.1694	NO
Fdft1	100.232	108.204	89.652	98.8759	104.169	85.1005	NO
Psmd10	100.223	91.2676	89.4934	94.7982	88.2056	79.0244	NO
Pomp	100.15	94.8769	104.344	93.6468	91.2266	93.1618	NO
Scoc	100.149	91.8897	88.55	69.8914	83.2609	84.9429	NO
Gpd1l	100.101	92.629	85.7142	75.5578	85.9681	83.4207	NO
Mfsd5	100.093	147.675	154.749	147.008	161.355	144.355	NO
Stard7	99.9837	102.686	99.8718	81.6679	90.7107	93.134	NO
Ncstn	99.8812	96.3128	89.9904	80.7014	82.5446	93.1835	NO
Pip4p1	99.6609	111.951	105.283	107.144	113.203	106.06	NO
Rpl23	99.6361	91.6723	96.0341	106.473	93.8375	95.5354	NO
Cask	99.632	81.9452	83.4073	96.6313	93.6851	93.5053	NO
Necab3	99.5945	95.2203	86.0913	90.3682	91.6912	99.8545	NO
Rnf5	99.5827	91.581	92.1306	91.2113	101.391	95.2463	NO
Nelfcd	99.5405	100.831	88.2154	105.445	102.555	88.0189	NO
Ckap5	99.4923	93.9111	91.2325	73.638	81.0489	90.7746	NO
Eif3l	99.4483	92.8402	88.6321	83.7	88.8665	80.9505	NO
Rad21	99.4397	95.8652	92.5077	78.6583	97.0253	99.3638	NO
Hes5	99.2862	82.272	79.3253	78.9109	125.328	82.0522	NO
Msrb2	99.2645	84.1153	100.473	89.6202	79.4008	83.9793	NO
Slc25a17	99.2465	97.1371	86.8368	80.5888	86.4273	81.8253	NO
Gpr85	99.2378	93.5393	84.2901	71.0897	83.163	71.5998	NO
Chmp7	99.1854	96.3535	89.726	89.9925	89.8356	85.3419	NO
AI413582	99.1126	97.8912	103.531	104.154	89.2846	81.8891	NO
Cebpzos	99.1093	83.5601	100.448	108.283	86.9456	89.9839	NO
Vhl	99.0821	96.8242	99.5416	86.2324	94.8371	97.1718	NO
Ndufaf3	99.0392	93.0139	93.1196	98.0754	87.9353	82.3836	NO
Sesn1	98.994	97.9454	87.941	68.5287	76.6815	73.9215	NO
Morf4l1	98.9773	98.6975	89.2292	88.2506	102.857	88.5731	NO
Tmem14c	98.9549	95.5485	102.286	76.6947	73.1695	82.3483	NO
Vdac3	98.9314	92.1569	91.2267	87.7824	89.4977	83.7334	NO
Adipor1	98.9041	112.782	113.406	111.413	106.93	99.6852	NO
Stxbp6	98.8108	96.8318	94.8074	93.4562	85.2632	94.3975	NO
Arnt2	98.761	123.085	121.826	111.28	117.291	127.139	NO
Atp2c1	98.7481	96.3371	87.906	65.1532	71.1438	77.5268	NO
Mal	98.7333	123.09	74.2001	60.5691	96.1763	115.42	NO
Stau2	98.7078	93.4167	101.507	95.4212	101.257	93.0567	NO
Eif3k	98.6363	103.869	106.546	102.317	93.6873	92.7692	NO
A430005L14Rik	98.5877	96.4915	96.9767	102.439	89.0165	75.663	NO
Ankrd13d	98.5038	94.2931	98.8796	107.777	101.365	89.5606	NO
Dner	98.4849	105.651	100.814	68.0116	75.5525	87.7351	NO
Snx5	98.4155	112.955	109.076	97.7693	108.099	115.291	NO
Hspa12a	98.3335	100.795	82.4307	57.0615	66.8202	90.8372	NO
Sh3bp5	98.3291	97.5274	95.6925	75.1053	86.9904	80.779	NO
Acsl6	98.2945	100.61	93.1282	69.9964	87.2393	109.051	NO
Snph	98.2582	111.577	104.969	92.519	97.3877	109.845	NO
Tbr1	98.2164	129.967	104.876	67.7844	98.5864	107.413	NO
Tstd3	98.2084	91.2058	91.6619	83.4057	105.977	97.4701	NO
Rbfox2	98.1903	101.079	117.032	101.45	94.0767	97.3422	NO
Nfix	98.1215	109.334	119.934	150.244	138.814	113.298	NO
Ncbp2	98.0963	98.366	97.3143	89.2484	79.3586	79.6202	NO
Pdcd6	97.9706	92.4898	97.6133	84.9868	80.0464	87.7891	NO
Usp8	97.8508	94.0678	81.8735	68.7486	78.5416	86.6584	NO
Igsf8	97.8277	110.38	96.4056	97.3425	97.0283	90.1428	NO
Nrep	97.8233	89.0725	89.1106	66.4311	90.3771	81.1305	NO
Atad1	97.8178	96.5174	83.4818	62.9889	78.2166	79.6758	NO
Gdap1	97.814	92.929	83.0212	68.6955	77.0719	83.7006	NO
Ncl	97.8091	96.294	85.8928	78.233	91.3062	88.148	NO
2410004B18Rik	97.6986	93.4083	94.1148	85.9373	80.3413	72.6473	NO
Rab5a	97.489	138.329	124.057	102.535	119.805	122.893	NO
Gdi2	97.4624	96.2494	91.1669	70.3422	81.9492	86.5525	NO
Slc25a18	97.4445	84.5866	98.2935	85.0379	113.448	136.768	NO
Grin2a	97.4062	102.444	110.984	78.6567	84.8531	121.148	NO
Pnisr	97.3848	83.8869	103.02	69.0658	76.3497	114.604	NO
Kars	97.3185	88.5408	87.3625	93.0354	98.3646	80.9967	NO
Ctnnb1	97.2946	106.332	100.413	80.1487	88.5341	83.5547	NO
Ift57	97.2611	93.9419	91.0053	79.7151	77.0579	79.9897	NO
Nelfb	97.2565	101.994	95.0751	94.7698	91.4701	88.5051	NO
Arfgap1	97.2264	90.4696	87.6175	85.8489	91.5497	91.5826	NO
Elof1	97.1575	97.9848	93.8028	99.5507	86.1476	82.2679	NO
Supt5	97.1564	91.8318	86.4542	80.4045	91.7324	88.9419	NO
Smg7	97.0561	89.3919	91.8209	79.0137	70.9303	81.9245	NO
Mobp	97.0061	132.643	75.2559	48.5173	100.905	138.159	NO
ENSMUSG00000117901	96.9271	90.4553	93.4714	108.178	98.3375	80.9733	NO
[truncated: 53,422 more rows]

## Sheet: Heatmap_sig_CPM
Gene_Name	Cx.6.10	Cx.6.11	Cx.6.17	Cx.24.2	Cx.24.4	Cx.24.5	Heatmap
Gm41414	-0.721259	1.00012	-0.967345	-2.42425	-1.91374	-3.06915	YES	-0.229494	-2.46905	-2.23955
Cyp26b1	3.28771	2.55582	2.75235	0.137897	1.72839	1.39117	YES	2.86529	1.08582	-1.77947
Klf10	8.02727	8.1926	7.92619	7.28575	6.32275	6.38742	YES	8.04868	6.66531	-1.38337
Gadd45a	3.70882	4.06111	3.64195	2.49538	2.68266	2.56609	YES	3.80396	2.58137	-1.22259
Ptpro	4.2422	4.65989	4.24876	3.2213	3.34653	3.25921	YES	4.38362	3.27568	-1.10794
Kcng1	4.54793	4.87713	4.68645	4.02046	3.63901	3.31151	YES	4.70383	3.65699	-1.04684
Jun	6.51706	6.64954	6.23902	5.81875	5.23512	5.52393	YES	6.46854	5.52594	-0.942606
Tenm1	5.64667	5.48611	5.53837	4.38059	4.55507	4.94406	YES	5.55705	4.62657	-0.930479
Zmym1	3.97959	4.23292	3.8215	3.36944	2.93572	2.97565	YES	4.01134	3.0936	-0.917735
Sstr2	5.09956	5.27699	4.72961	4.21907	4.17442	4.14123	YES	5.03539	4.17824	-0.857144
ENSMUSG00000061654	4.94558	4.59325	4.57616	3.82577	3.76877	4.02596	YES	4.70499	3.8735	-0.831493
Ptchd1	4.34843	4.47793	4.20708	3.42553	3.6116	3.68635	YES	4.34448	3.57449	-0.769986
Negr1	8.37854	8.34581	8.10815	7.35377	7.42421	7.78007	YES	8.2775	7.51935	-0.758154
Plppr4	8.83011	8.51826	8.41817	7.78023	7.82396	7.91419	YES	8.58885	7.83946	-0.749386
Islr2	5.68952	5.90685	5.86384	4.84819	5.07374	5.29197	YES	5.82007	5.0713	-0.748773
Hspa5	9.44265	9.4942	9.59277	8.91944	8.81787	8.74355	YES	9.50987	8.82695	-0.682921
Rgs4	10.7121	10.4879	10.4061	9.85123	9.69449	10.0506	YES	10.5354	9.86545	-0.669934
Cx3cl1	9.96101	9.99028	10.0193	9.48356	9.35013	9.36186	YES	9.99019	9.39852	-0.591672
Gria2	10.3693	10.3369	10.128	9.57421	9.75809	9.9683	YES	10.278	9.76687	-0.511154
Syn1	9.81609	9.81253	9.75047	9.30128	9.22379	9.44646	YES	9.79303	9.32384	-0.469183
Hspa8	10.3715	10.3928	10.1784	9.92857	9.91589	9.84092	YES	10.3142	9.89513	-0.419113
Gpm6a	11.2574	11.1586	11.0704	10.6346	10.8353	10.8465	YES	11.1622	10.7721	-0.390012
Ndfip1	10.9959	10.8306	10.781	10.4826	10.5252	10.438	YES	10.8691	10.4819	-0.387202
Nsf	11.0449	11.0413	10.8781	10.4805	10.6237	10.7048	YES	10.9881	10.603	-0.385133
Rtn1	10.5006	10.5254	10.4506	10.1903	10.0736	10.0728	YES	10.4922	10.1123	-0.379964
Ywhah	10.6338	10.5109	10.4016	10.158	10.1246	10.149	YES	10.5154	10.1438	-0.371577
Calm2	12.1591	11.945	11.9126	11.789	11.7804	11.6874	YES	12.0056	11.7523	-0.253283
Gm42772	4.11686	4.37854	4.34159	5.24219	4.91601	4.98891	YES	4.27899	5.04904	0.770044
Slc26a10	2.44019	2.25321	2.32004	2.92463	3.2161	3.45016	YES	2.33781	3.19696	0.859153
Gm43829	2.36118	2.70214	2.70654	3.55883	3.48892	3.52959	YES	2.58995	3.52578	0.935824
Zc3hav1	2.74687	2.39298	2.93934	3.51972	3.78419	3.58376	YES	2.69306	3.62922	0.936158
C030015E24Rik	1.88429	2.27888	2.10487	3.1151	2.91904	3.20954	YES	2.08935	3.08123	0.991878
mt-Tc	2.25833	2.4163	2.38794	3.38693	3.09266	3.64957	YES	2.35419	3.37639	1.0222
Gm43321	1.12518	1.45518	1.46858	2.66985	2.51525	2.06492	YES	1.34964	2.41667	1.06703
Gm44830	1.79359	1.81236	2.00029	2.93061	2.95766	3.00241	YES	1.86875	2.96356	1.09481
Igfn1	2.6319	2.39298	2.59605	3.98644	3.40757	3.5259	YES	2.54031	3.63997	1.09966
Casp1	1.34187	1.52834	1.61744	2.65549	2.68923	2.44644	YES	1.49588	2.59705	1.10117
Ntn5	0.70925	1.02055	1.11495	2.27823	1.80299	2.27266	YES	0.948251	2.11796	1.16971
Gm43318	4.00002	4.05864	4.25559	5.518	5.27826	5.06959	YES	4.10475	5.28861	1.18386
Gm42919	1.53022	1.19248	0.945033	2.74638	2.28303	2.228	YES	1.22258	2.41914	1.19656
mt-Ts2	1.46454	1.95719	1.09477	3.2213	2.61525	2.35803	YES	1.5055	2.73152	1.22602
C4b	1.9092	2.95128	2.7329	3.9457	4.08506	3.2503	YES	2.53113	3.76036	1.22923
ENSMUSG00000095041	7.43079	6.79562	7.63476	8.39516	8.65088	8.55349	YES	7.28705	8.53317	1.24612
B230217J21Rik	-0.382226	-0.539809	-0.354443	0.817343	0.766862	0.938077	YES	-0.425492	0.840761	1.26625
Gm38157	-0.575955	-0.0392722	-0.0549091	1.01027	1.03793	1.14439	YES	-0.223379	1.0642	1.28758
mt-Tl2	1.62346	1.48489	1.30257	3.00046	2.68923	2.60153	YES	1.47031	2.76374	1.29343
Flnc	-0.721259	-0.731501	-0.3	0.710252	0.974786	0.470681	YES	-0.584253	0.718573	1.30283
Ttn	1.62346	1.66441	2.10487	3.42129	3.19778	2.72236	YES	1.79758	3.11381	1.31623
Ush2a	-1.38984	-0.952624	-1.14789	0.0959689	0.49413	-0.0389288	YES	-1.16345	0.183723	1.34717
Hpn	-1.51675	-1.21388	-1.46975	0.294392	-0.231766	-0.176236	YES	-1.40013	-0.0378699	1.36226
Ugt1a6a	-1.51675	-1.31266	-1.24741	0.294392	0.0390659	-0.275617	YES	-1.35894	0.0192803	1.37822
Gm43048	2.39683	2.20938	2.71978	4.19941	3.74057	3.53326	YES	2.442	3.82441	1.38242
Pkhd1	-1.06486	-0.952624	-0.662531	0.817343	0.463791	0.201777	YES	-0.893338	0.494304	1.38764
Vmn2r105	-0.882854	-1.79353	-1.14789	0.256831	0.157531	-0.0389288	YES	-1.27476	0.125144	1.3999
Gm4117	0.357773	1.02055	1.09477	2.55075	2.27431	1.85775	YES	0.824367	2.2276	1.40324
E230020A03Rik	0.0792744	0.515611	-0.148011	1.43705	1.53767	1.70971	YES	0.148958	1.56148	1.41252
Gm48717	-0.646779	-0.12644	-0.148011	1.29604	1.28351	0.846512	YES	-0.307077	1.14202	1.44909
Lctl	0.034708	-0.0392722	-0.595425	1.66922	1.3347	0.74874	YES	-0.199996	1.25089	1.45088
Olfr943	-1.65592	-1.4187	-1.59526	0.00827018	-0.445452	0.125918	YES	-1.55663	-0.103755	1.45287
Gm26861	-2.17838	-1.31266	-1.14789	0.0527858	-0.334656	0.0458478	YES	-1.54631	-0.0786742	1.46764
Vmn2r3	-1.06486	-0.952624	-1.46975	0.594569	0.523843	-0.176236	YES	-1.16241	0.314059	1.47647
Ube2nl	-1.65592	-1.21388	-1.46975	-0.0376629	-0.00268741	0.164346	YES	-1.44652	0.0413319	1.48785
Gm50166	-1.65592	-1.4187	-1.14789	0.435561	0.368749	-0.558907	YES	-1.4075	0.081801	1.4893
Vmn2r120	-1.65592	-1.03456	-1.59526	0.294392	0.335625	-0.438838	YES	-1.42858	0.0637262	1.49231
Vmn2r66	-1.51675	-1.65748	-1.3543	0.331	-0.0456852	-0.327999	YES	-1.50951	-0.0142279	1.49528
Mybl2	-1.80997	-1.21388	-1.46975	0.366702	0.267002	-0.622909	YES	-1.49787	0.00359844	1.50147
Ppp1r1c	-1.38984	-2.11149	-2.46945	-0.67221	-0.388991	-0.382354	YES	-1.99026	-0.481185	1.50907
Haao	-1.38984	-1.79353	-1.88469	-0.184948	0.157531	-0.497624	YES	-1.68935	-0.175014	1.51434
Epx	-2.17838	-2.11149	-1.24741	-0.0376629	-0.182948	-0.760118	YES	-1.84576	-0.32691	1.51885
Olfr145	-2.67439	-1.94377	-1.88469	-0.408105	-0.766585	-0.760118	YES	-2.16762	-0.644936	1.52268
Vmn2r20	-1.65592	-1.79353	-2.24714	0.00827018	-0.565469	-0.558907	YES	-1.89887	-0.372035	1.52683
Ctcfl	-1.51675	-2.11149	-2.46945	-0.348997	-0.231766	-0.911761	YES	-2.03256	-0.497508	1.53506
Fau-ps2	-0.266165	0.158062	0.875774	2.0666	1.94154	1.37488	YES	0.25589	1.79434	1.53845
Trim6	-1.98245	-1.65748	-1.59526	-0.292216	-0.182948	-0.129	YES	-1.74506	-0.201388	1.54367
Vmn2r93	-1.65592	-1.94377	-1.88469	0.00827018	-0.231766	-0.622909	YES	-1.82813	-0.282135	1.54599
Clec4e	-2.40518	-2.51993	-1.88469	-0.67221	-0.504213	-0.994012	YES	-2.26993	-0.723478	1.54645
Vmn1r229	-1.65592	-1.65748	-1.05479	0.564139	0.0390659	-0.327999	YES	-1.45606	0.0917352	1.5478
Dusp27	-0.882854	-1.53315	-0.662531	0.218265	0.815726	0.559865	YES	-1.02618	0.531285	1.55746
E230025N22Rik	-2.17838	-2.77771	-1.73273	-0.746549	-0.766585	-0.497624	YES	-2.22961	-0.670253	1.55935
Gm44951	-2.17838	-1.94377	-1.59526	0.00827018	-0.766585	-0.275617	YES	-1.9058	-0.344644	1.56116
Cyp2e1	-0.323028	0.331624	0.404491	1.51866	1.76618	1.82214	YES	0.137696	1.70233	1.56463
Vmn2r17	-1.80997	-1.4187	-1.46975	0.501282	0.119113	-0.622909	YES	-1.56614	-0.000838109	1.5653
Mylk4	-1.51675	-1.94377	-2.24714	-0.237585	-0.00268741	-0.760118	YES	-1.90256	-0.333464	1.56909
Vmn2r115	-1.27318	-1.65748	-1.59526	0.401542	0.231427	-0.438838	YES	-1.50864	0.0647103	1.57335
Tns4	-1.98245	-1.79353	-1.73273	-0.348997	0.401131	-0.833948	YES	-1.83624	-0.260605	1.57563
Mgst2	-1.27318	-2.3013	-1.59526	0.0527858	-0.445452	-0.0389288	YES	-1.72325	-0.143865	1.57938
Vmn1r183	-2.40518	-2.11149	-1.88469	-0.469738	-0.629443	-0.558907	YES	-2.13378	-0.552696	1.58109
Mpp4	-1.98245	-1.31266	-1.73273	0.0959689	0.119113	-0.497624	YES	-1.67594	-0.0941805	1.58176
Rasef	-2.17838	-2.11149	-2.46945	-0.534122	-0.766585	-0.689883	YES	-2.25311	-0.66353	1.58958
Gm8251	-1.27318	-0.664733	-0.884895	1.01027	0.636931	0.308573	YES	-0.940937	0.651926	1.59286
Myo3a	-2.17838	-1.79353	-1.46975	-0.237585	0.0796447	-0.497624	YES	-1.81389	-0.218521	1.59537
Vmn1r28	-1.38984	-1.94377	-2.46945	-0.0376629	-0.334656	-0.622909	YES	-1.93435	-0.331743	1.60261
Col7a1	-1.16526	-0.801509	-2.05456	0.366702	0.0796447	0.342485	YES	-1.34045	0.262944	1.60339
Olfr77	-1.51675	-1.94377	-1.88469	0.256831	-0.231766	-0.558907	YES	-1.78174	-0.177947	1.60379
Vmn2r59	-1.51675	-1.94377	-1.3543	0.468795	-0.182948	-0.275617	YES	-1.60494	0.00341014	1.60835
Nlrp5-ps	-1.65592	-1.12144	-1.14789	0.0959689	0.194952	0.616399	YES	-1.30842	0.30244	1.61086
Gm50268	-0.970988	-0.172082	-0.531302	1.61087	0.766862	0.798454	YES	-0.558124	1.05873	1.61685
Vmn2r76	-0.508447	-0.424845	-0.531302	1.29604	1.4782	0.616399	YES	-0.488198	1.13021	1.61841
Slamf8	-1.38984	-1.65748	-2.05456	0.65357	-0.388991	-0.497624	YES	-1.70062	-0.0776816	1.62294
C2cd6	-2.17838	-1.21388	-2.05456	0.00827018	0.0390659	-0.622909	YES	-1.81561	-0.191858	1.62375
Ildr1	-1.98245	-1.94377	-2.46945	-0.184948	-0.504213	-0.833948	YES	-2.13189	-0.507703	1.62418
2310043P16Rik	-3.00564	-1.94377	-1.73273	-0.408105	-0.840376	-0.558907	YES	-2.22738	-0.602463	1.62492
Vmn2r69	-1.98245	-1.31266	-1.24741	0.256831	0.523843	-0.438838	YES	-1.51417	0.113945	1.62812
Rrh	-2.67439	-2.11149	-1.73273	-0.67221	-0.445452	-0.497624	YES	-2.17287	-0.538429	1.63444
Gm34885	-2.67439	-2.77771	-2.05456	-0.746549	-1.00035	-0.833948	YES	-2.50222	-0.860282	1.64194
A130071D04Rik	-1.98245	-2.11149	-2.24714	-0.0851066	-0.766585	-0.558907	YES	-2.11369	-0.470199	1.64349
Wt1	-2.40518	-1.94377	-1.14789	-0.601515	-0.182948	0.238261	YES	-1.83228	-0.182067	1.65021
Vmn2r102	-1.51675	-0.875089	-1.14789	1.03267	0.636931	-0.225071	YES	-1.17991	0.481511	1.66142
Gm28262	-3.00564	-2.3013	-2.46945	-0.601515	-1.1803	-0.994012	YES	-2.59213	-0.925275	1.66686
Gm43169	-3.00564	-1.79353	-2.46945	-0.408105	-0.840376	-0.994012	YES	-2.42287	-0.747498	1.67538
Olfr50	-1.27318	-2.51993	-1.59526	0.218265	-0.135727	-0.438838	YES	-1.79612	-0.118767	1.67736
Ccdc7a	-2.17838	-2.3013	-2.46945	-0.292216	-0.445452	-1.17408	YES	-2.31638	-0.637248	1.67913
Slc6a5	-2.67439	-2.51993	-2.73236	-0.601515	-1.00035	-1.2733	YES	-2.64223	-0.958389	1.68384
Olfr1427	-2.67439	-2.77771	-2.46945	-1.41347	-0.766585	-0.689883	YES	-2.64052	-0.956645	1.68387
4930432E11Rik	-2.40518	-1.94377	-2.05456	-0.348997	-0.090004	-0.911761	YES	-2.1345	-0.450254	1.68425
Dcdc5	-2.40518	-1.79353	-1.3543	-0.134164	-0.282294	-0.0832615	YES	-1.851	-0.166573	1.68443
Gm43412	-2.40518	-2.77771	-2.46945	-0.67221	-1.08752	-0.833948	YES	-2.55078	-0.864559	1.68622
Gm43637	-2.67439	-2.3013	-3.0541	-1.18954	-0.696385	-1.08124	YES	-2.6766	-0.989054	1.68755
Gm20796	-2.67439	-2.3013	-3.0541	-0.995746	-0.696385	-1.2733	YES	-2.6766	-0.988478	1.68812
Vmn1r46	-1.51675	-1.12144	-1.46975	0.564139	0.119113	0.308573	YES	-1.36932	0.330608	1.69992
Gm35940	-2.67439	-2.51993	-2.24714	-0.824928	-0.231766	-1.2733	YES	-2.48049	-0.776666	1.70382
Vmn1r214	-3.00564	-2.51993	-2.24714	-0.348997	-0.918147	-1.37986	YES	-2.59091	-0.882336	1.70857
Vmn2r79	-1.65592	-2.77771	-1.59526	0.294392	-0.504213	-0.689883	YES	-2.00963	-0.299901	1.70973
Olfr190	-2.67439	-1.79353	-3.0541	-0.469738	-0.840376	-1.08124	YES	-2.50734	-0.797117	1.71023
Fsip2	-0.721259	-0.952624	-1.88469	0.682189	0.766862	0.125918	YES	-1.18619	0.52499	1.71118
Olfr273	-3.00564	-2.51993	-1.73273	-0.184948	-1.08752	-0.833948	YES	-2.41943	-0.702139	1.71729
M1ap	-3.00564	-3.09179	-2.73236	-1.29716	-1.27946	-1.08124	YES	-2.94326	-1.21929	1.72398
Gm4951	-1.06486	-1.12144	-0.0105184	1.31444	1.07854	0.588409	YES	-0.732272	0.993794	1.72607
Olfr1280	-2.40518	-2.51993	-2.73236	-0.534122	-0.766585	-1.17408	YES	-2.55249	-0.824928	1.72756
Olfr2	-2.67439	-2.51993	-3.0541	-0.67221	-1.00035	-1.37986	YES	-2.74948	-1.01747	1.732
Dsp	-1.80997	-1.65748	-3.0541	-0.292216	-0.334656	-0.689883	YES	-2.17385	-0.438918	1.73493
H1f3	-2.67439	-1.94377	-1.88469	0.0959689	-0.282294	-1.08124	YES	-2.16762	-0.422521	1.7451
Mmrn1	-2.67439	-1.65748	-2.46945	-0.534122	-0.696385	-0.327999	YES	-2.26711	-0.519502	1.7476
G630018N14Rik	-2.40518	-2.11149	-2.46945	-0.134164	-0.696385	-0.911761	YES	-2.3287	-0.58077	1.74793
Gm30132	-2.40518	-2.77771	-2.73236	-0.348997	-0.696385	-1.61997	YES	-2.63841	-0.88845	1.74997
Olfr1192-ps1	-3.43635	-1.94377	-1.88469	-0.292216	-0.629443	-1.08124	YES	-2.4216	-0.667632	1.75397
Vmn1r58	-3.00564	-2.3013	-2.05456	-0.408105	-0.696385	-0.994012	YES	-2.45384	-0.699501	1.75434
Vmn2r108	-3.00564	-2.77771	-2.24714	-0.995746	-0.766585	-0.994012	YES	-2.67683	-0.918781	1.75805
Vmn1r230	-2.40518	-3.09179	-2.24714	-0.601515	-0.918147	-0.911761	YES	-2.58137	-0.810474	1.7709
Olfr1233	-2.67439	-2.51993	-2.46945	-0.348997	-0.504213	-1.49493	YES	-2.55459	-0.782712	1.77188
Olfr354	-1.38984	-1.94377	-3.0541	-0.237585	-0.388991	-0.438838	YES	-2.12924	-0.355138	1.7741
Six3os1	-3.00564	-1.94377	-2.73236	-0.348997	-0.504213	-1.49493	YES	-2.56059	-0.782712	1.77788
Atp1a4	-3.00564	-1.94377	-2.73236	-0.601515	-0.565469	-1.17408	YES	-2.56059	-0.780354	1.78024
Mdfic2	3.25409	3.38468	3.13975	5.32279	5.09616	4.70757	YES	3.25951	5.04218	1.78267
Rdh16	-2.40518	-3.09179	-1.88469	-0.746549	-1.00035	-0.275617	YES	-2.46055	-0.674172	1.78638
Zfp985	-2.40518	-2.3013	-3.0541	-0.134164	-0.504213	-1.75688	YES	-2.58686	-0.79842	1.78844
Vmn1r87	-3.43635	-2.77771	-2.73236	-0.90781	-1.38594	-1.2733	YES	-2.98214	-1.18902	1.79312
C920009B18Rik	-3.00564	-2.77771	-2.24714	-0.601515	-0.766585	-1.2733	YES	-2.67683	-0.880468	1.79636
Gm20546	-4.05318	-4.05318	-4.05318	-2.00381	-2.49431	-2.26869	YES	-4.05318	-2.2556	1.79758
Vmn2r9	-2.40518	-2.77771	-2.46945	-0.90781	-0.504213	-0.833948	YES	-2.55078	-0.748657	1.80212
Gm29683	-3.43635	-2.77771	-2.73236	-0.995746	-0.918147	-1.61997	YES	-2.98214	-1.17795	1.80419
1520401A03Rik	-1.65592	-3.09179	-2.05456	-0.134164	-0.696385	-0.558907	YES	-2.26743	-0.463152	1.80427
Zan	-1.65592	-1.12144	-0.662531	1.16022	0.690316	0.125918	YES	-1.14663	0.658817	1.80545
Vmn2r104	-2.67439	-2.51993	-1.73273	0.294392	-0.629443	-1.17408	YES	-2.30902	-0.503042	1.80597
Vmn1r193	-2.67439	-2.51993	-2.46945	-0.824928	-0.231766	-1.17408	YES	-2.55459	-0.74359	1.811
Gm43180	-2.40518	-1.4187	-3.0541	-0.292216	-0.445452	-0.689883	YES	-2.29266	-0.47585	1.81681
Olfr713	-3.00564	-2.3013	-3.0541	-0.824928	-1.00035	-1.08124	YES	-2.78702	-0.968838	1.81818
Vmn2r112	-2.67439	-1.94377	-0.806903	0.218265	-0.135727	-0.0389288	YES	-1.80835	0.0145364	1.82289
Ms4a4b	-1.65592	-2.51993	-1.24741	0.178641	-0.00268741	-0.129	YES	-1.80775	0.0156512	1.8234
Olfr920	-2.40518	-2.11149	-1.88469	-0.0851066	-0.282294	-0.558907	YES	-2.13378	-0.308769	1.82502
Olfr839-ps1	-3.00564	-3.09179	-2.24714	-0.67221	-0.918147	-1.2733	YES	-2.78153	-0.954554	1.82697
Gp6	-3.43635	-2.51993	-2.24714	-0.534122	-0.565469	-1.61997	YES	-2.73448	-0.90652	1.82796
Vmn2r97	-1.65592	-3.09179	-1.73273	-0.184948	-0.0456852	-0.760118	YES	-2.16015	-0.33025	1.8299
Atf7ip2	-2.17838	-3.09179	-3.46883	-1.41347	-0.918147	-0.911761	YES	-2.913	-1.08113	1.83188
Gm37985	0.32113	0.120696	0.645486	2.58903	2.3003	1.69666	YES	0.362437	2.19533	1.83289
Vmn2r53	-1.80997	-1.79353	-1.05479	0.594569	0.581495	-0.327999	YES	-1.55276	0.282688	1.83545
Vmn1r81	-2.17838	-1.53315	-2.24714	-0.184948	-0.135727	-0.129	YES	-1.98623	-0.149892	1.83633
Olfr1209	-2.67439	-3.09179	-3.0541	-0.534122	-1.27946	-1.49493	YES	-2.9401	-1.10283	1.83726
Vmn2r116	-2.67439	-3.09179	-2.24714	-0.408105	-0.918147	-1.17408	YES	-2.67111	-0.833443	1.83767
Vmn1r209	-3.43635	-2.77771	-3.0541	-0.90781	-1.08752	-1.75688	YES	-3.08939	-1.25074	1.83865
Duxf3	-2.67439	-3.09179	-3.0541	-0.824928	-0.565469	-1.90817	YES	-2.9401	-1.09952	1.84057
Shoc1	-3.00564	-2.51993	-2.24714	-0.469738	-0.504213	-1.2733	YES	-2.59091	-0.749085	1.84182
Itgal	-1.51675	-1.94377	-2.24714	-0.0376629	0.0390659	-0.176236	YES	-1.90256	-0.0582776	1.84428
Tbx20	-1.65592	-1.79353	-2.73236	0.218265	-0.334656	-0.497624	YES	-2.06061	-0.204671	1.85593
1700011B04Rik	-3.43635	-3.49384	-3.46883	-1.29716	-1.62583	-1.90817	YES	-3.46634	-1.61039	1.85596
Gm45039	-3.43635	-2.51993	-3.46883	-1.29716	-1.38594	-1.17408	YES	-3.14171	-1.28573	1.85598
ENSMUSG00000115801	-0.211458	-0.172082	-0.732912	1.94196	1.59478	0.915725	YES	-0.372151	1.48416	1.85631
Olfr1301	-3.00564	-3.09179	-2.73236	-0.601515	-1.27946	-1.37986	YES	-2.94326	-1.08694	1.85632
Olfr1459	-3.00564	-2.77771	-3.46883	-0.824928	-1.08752	-1.75688	YES	-3.08406	-1.22311	1.86095
Olfr1489	-1.38984	-2.3013	-2.46945	-0.0376629	0.231427	-0.760118	YES	-2.05353	-0.188785	1.86474
Olfr640	-2.67439	-2.3013	-3.46883	-0.67221	-1.00035	-1.17408	YES	-2.81484	-0.948879	1.86596
Gm39465	-3.00564	-2.3013	-2.46945	-0.237585	-0.766585	-1.17408	YES	-2.59213	-0.726082	1.86605
Crocc2	-2.67439	-3.49384	-2.46945	-1.29716	-0.565469	-1.17408	YES	-2.87923	-1.01224	1.86699
1700061I17Rik	-3.43635	-3.49384	-4.05318	-1.83209	-1.76262	-1.75688	YES	-3.66113	-1.78386	1.87726
Vmn1r55	-1.98245	-1.4187	-0.662531	0.624371	0.432801	0.530745	YES	-1.35456	0.529306	1.88386
Gm17791	-4.05318	-4.05318	-4.05318	-1.83209	-1.91374	-2.75043	YES	-4.05318	-2.16542	1.88776
Gm43567	-4.05318	-4.05318	-4.05318	-1.83209	-1.91374	-2.75043	YES	-4.05318	-2.16542	1.88776
Gm31410	-2.67439	-3.49384	-3.46883	-1.08939	-1.5009	-1.37986	YES	-3.21236	-1.32339	1.88897
Gm3234	-2.17838	-4.05318	-1.88469	-0.534122	-1.00035	-0.911761	YES	-2.70542	-0.815411	1.89001
Ccdc178	-2.40518	-3.09179	-3.46883	-0.995746	-0.918147	-1.37986	YES	-2.9886	-1.09792	1.89068
Nlrp12	-2.67439	-3.49384	-2.46945	-0.469738	-1.00035	-1.49493	YES	-2.87923	-0.988338	1.89089
Gm47398	-3.43635	-4.05318	-4.05318	-1.83209	-1.76262	-2.26869	YES	-3.84757	-1.95447	1.89311
Jchain	-1.38984	-1.79353	-0.595425	0.842918	1.19393	-0.129	YES	-1.2596	0.63595	1.89555
Gm50317	-3.43635	-3.49384	-3.46883	-1.41347	-1.38594	-1.90817	YES	-3.46634	-1.56919	1.89715
Olfr1448	-3.43635	-3.09179	-2.73236	-1.08939	-1.08752	-1.37986	YES	-3.08683	-1.18559	1.90124
Hmga2	-2.67439	-2.51993	-3.0541	-0.534122	-0.629443	-1.37986	YES	-2.74948	-0.84781	1.90167
Vmn2r65	-2.40518	-2.3013	-2.24714	0.00827018	-0.840376	-0.382354	YES	-2.31787	-0.40482	1.91305
Olfr117	-3.00564	-3.09179	-2.24714	-0.995746	-0.918147	-0.689883	YES	-2.78153	-0.867925	1.9136
Speer5-ps1	-2.67439	-2.77771	-3.0541	-0.67221	-0.918147	-1.17408	YES	-2.8354	-0.921478	1.91392
Olfr1370	-3.00564	-3.09179	-3.46883	-0.746549	-1.00035	-2.0772	YES	-3.18876	-1.2747	1.91406
Ugt2b34	-3.43635	-3.09179	-3.0541	-1.08939	-0.840376	-1.90817	YES	-3.19408	-1.27931	1.91477
Olfr844	-4.05318	-4.05318	-3.46883	-1.83209	-2.08256	-1.90817	YES	-3.8584	-1.94094	1.91746
Umod	-4.05318	-3.49384	-4.05318	-2.00381	-2.08256	-1.75688	YES	-3.86674	-1.94775	1.91898
Csn1s1	-2.67439	-2.3013	-3.0541	-1.18954	-0.388991	-0.689883	YES	-2.6766	-0.756138	1.92046
Lrrc37a	-2.67439	-2.51993	-2.73236	0.0959689	-0.504213	-1.75688	YES	-2.64223	-0.721709	1.92052
Gm43473	-2.17838	-2.3013	-2.05456	-0.184948	-0.090004	-0.497624	YES	-2.17808	-0.257525	1.92056
G930009F23Rik	-4.05318	-3.49384	-3.46883	-1.53998	-1.62583	-2.0772	YES	-3.67195	-1.74767	1.92429
Olfr137	-3.00564	-3.49384	-3.46883	-1.18954	-1.38594	-1.61997	YES	-3.32277	-1.39848	1.92429
Olfr1228	-2.67439	-3.09179	-2.24714	-0.348997	-0.504213	-1.37986	YES	-2.67111	-0.744358	1.92675
Gm45548	-3.00564	-3.49384	-2.46945	-1.08939	-1.00035	-1.08124	YES	-2.98965	-1.05699	1.93265
Olfr1256	-2.67439	-2.3013	-2.73236	-0.408105	-0.504213	-0.994012	YES	-2.56935	-0.635443	1.93391
Adam7	-2.67439	-3.09179	-2.73236	-0.601515	-1.1803	-0.911761	YES	-2.83285	-0.897858	1.93499
Fat2	-2.17838	-2.11149	-1.88469	0.331	-0.135727	-0.558907	YES	-2.05819	-0.121211	1.93698
Olfr9	-4.05318	-4.05318	-4.05318	-1.67865	-1.91374	-2.75043	YES	-4.05318	-2.11428	1.93891
Muc5b	-2.67439	-2.3013	-2.73236	-0.348997	-0.0456852	-1.49493	YES	-2.56935	-0.629869	1.93948
Vmn2r114	-2.67439	-1.4187	-1.88469	0.256831	-0.135727	-0.275617	YES	-1.99259	-0.0515046	1.94109
Bglap3	-1.98245	-2.11149	-2.46945	-0.534122	0.49413	-0.689883	YES	-2.18779	-0.243292	1.9445
Olfr418	-3.00564	-3.49384	-3.46883	-0.746549	-1.76262	-1.61997	YES	-3.32277	-1.37638	1.9464
Sult1b1	-3.43635	-2.77771	-4.05318	-1.29716	-1.62583	-1.49493	YES	-3.42242	-1.47264	1.94977
Ppp1r3a	-1.80997	-2.51993	-2.73236	-0.0376629	-0.334656	-0.833948	YES	-2.35409	-0.402089	1.952
Olfr1391	-3.00564	-4.05318	-2.73236	-1.08939	-1.08752	-1.75688	YES	-3.26373	-1.31126	1.95246
Hdnr	-3.00564	-2.51993	-2.73236	0.0527858	-0.696385	-1.75688	YES	-2.75264	-0.800161	1.95248
Olfr934	-3.43635	-3.49384	-4.05318	-2.00381	-1.62583	-1.49493	YES	-3.66113	-1.70819	1.95294
Akr1d1	-4.05318	-3.49384	-3.0541	-1.18954	-1.62583	-1.90817	YES	-3.53371	-1.57451	1.9592
Olfr1273-ps	-3.00564	-3.49384	-3.46883	-1.41347	-1.91374	-0.760118	YES	-3.32277	-1.36244	1.96033
Gm30524	-3.43635	-3.49384	-4.05318	-1.67865	-1.5009	-1.90817	YES	-3.66113	-1.69591	1.96522
Myo7b	-3.43635	-3.09179	-2.46945	-0.746549	-0.445452	-1.90817	YES	-2.9992	-1.03339	1.96581
Olfr983	-2.17838	-2.77771	-2.73236	-0.184948	-0.840376	-0.760118	YES	-2.56282	-0.595148	1.96767
Olfr95	-3.43635	-3.49384	-3.0541	-0.67221	-1.5009	-1.90817	YES	-3.3281	-1.36043	1.96767
Vmn2r23	-1.65592	-1.65748	-1.46975	0.842918	0.231427	0.0458478	YES	-1.59439	0.373398	1.96778
Mnd1-ps	-4.05318	-4.05318	-4.05318	-2.00381	-1.76262	-2.48955	YES	-4.05318	-2.08532	1.96786
Dsg1b	-4.05318	-4.05318	-4.05318	-1.67865	-2.08256	-2.48955	YES	-4.05318	-2.08359	1.9696
Tmprss11f	-1.98245	-3.49384	-2.46945	-0.348997	-0.918147	-0.760118	YES	-2.64858	-0.675754	1.97283
Hsd3b1	-4.05318	-4.05318	-4.05318	-1.83209	-2.49431	-1.90817	YES	-4.05318	-2.07819	1.975
Gpr132	-4.05318	-3.49384	-4.05318	-2.00381	-1.91374	-1.75688	YES	-3.86674	-1.89148	1.97526
Platr1	-3.43635	-3.09179	-3.0541	-0.746549	-1.00035	-1.90817	YES	-3.19408	-1.21836	1.97573
Gm6526	-3.43635	-4.05318	-4.05318	-1.41347	-1.91374	-2.26869	YES	-3.84757	-1.8653	1.98228
Olfr1307	-3.00564	-1.94377	-2.05456	0.0959689	-0.231766	-0.911761	YES	-2.33466	-0.349186	1.98547
Olfr681	-3.43635	-4.05318	-3.46883	-1.29716	-1.62583	-2.0772	YES	-3.65279	-1.66673	1.98606
Gm37806	-3.43635	-2.77771	-3.0541	-0.601515	-1.08752	-1.61997	YES	-3.08939	-1.103	1.98639
Gm43404	-3.43635	-4.05318	-4.05318	-2.00381	-1.5009	-2.0772	YES	-3.84757	-1.86064	1.98694
Gm5444	-3.43635	-4.05318	-4.05318	-2.00381	-2.08256	-1.49493	YES	-3.84757	-1.86043	1.98714
Gm45389	-3.43635	-2.51993	-3.46883	-0.995746	-1.38594	-1.08124	YES	-3.14171	-1.15431	1.9874
Olfr847	-4.05318	-4.05318	-4.05318	-2.00381	-1.91374	-2.26869	YES	-4.05318	-2.06208	1.9911
Fam3b	-4.05318	-4.05318	-4.05318	-1.83209	-2.08256	-2.26869	YES	-4.05318	-2.06111	1.99207
1700122C19Rik	-3.43635	-2.51993	-2.46945	-0.534122	-0.918147	-0.994012	YES	-2.80858	-0.815427	1.99315
Muc16	-1.16526	-0.801509	-0.884895	1.62568	1.03793	0.470681	YES	-0.950556	1.04476	1.99532
Scn4a	-3.43635	-3.49384	-3.0541	-0.90781	-1.00035	-2.0772	YES	-3.3281	-1.32845	1.99965
Vmn1r29	-3.43635	-3.09179	-4.05318	-1.18954	-1.76262	-1.61997	YES	-3.52711	-1.52404	2.00307
Zfp268	-3.00564	-3.49384	-3.46883	-2.00381	-1.38594	-0.558907	YES	-3.32277	-1.31622	2.00656
Il2rb	-4.05318	-2.3013	-3.0541	-1.18954	-0.918147	-1.2733	YES	-3.1362	-1.127	2.0092
9430018G01Rik	-3.43635	-3.49384	-4.05318	-1.29716	-1.38594	-2.26869	YES	-3.66113	-1.6506	2.01053
Slc34a2	-3.43635	-3.49384	-2.46945	-1.08939	-1.27946	-0.994012	YES	-3.13322	-1.12095	2.01226
Olfr73	-4.05318	-4.05318	-3.0541	-1.53998	-2.08256	-1.49493	YES	-3.72016	-1.70582	2.01434
Aknad1	-2.40518	-2.3013	-1.88469	0.501282	-0.282294	-0.760118	YES	-2.19706	-0.180377	2.01668
Vmn2r58	-3.43635	-2.77771	-2.46945	-0.237585	-0.766585	-1.61997	YES	-2.8945	-0.874712	2.01979
Vmn1r185	-3.43635	-3.49384	-3.0541	-1.08939	-0.565469	-2.26869	YES	-3.3281	-1.30785	2.02025
Olfr1160	-3.00564	-4.05318	-2.73236	-0.601515	-1.5009	-1.61997	YES	-3.26373	-1.2408	2.02293
Olfr1501	-3.00564	-3.49384	-4.05318	-1.18954	-1.38594	-1.90817	YES	-3.51756	-1.49455	2.02301
Gm31814	-4.05318	-4.05318	-4.05318	-1.83209	-1.5009	-2.75043	YES	-4.05318	-2.02781	2.02537
Olfr535	-3.00564	-3.09179	-3.0541	-0.601515	-1.08752	-1.37986	YES	-3.05051	-1.02297	2.02755
Aadacl2	-3.43635	-4.05318	-4.05318	-2.00381	-1.1803	-2.26869	YES	-3.84757	-1.8176	2.02997
Gm46392	-4.05318	-3.49384	-3.0541	-1.83209	-0.918147	-1.75688	YES	-3.53371	-1.50237	2.03134
Adamts12	-1.98245	-1.31266	-1.3543	0.737779	0.581495	0.125918	YES	-1.5498	0.481731	2.03153
Vmn1r12	-3.43635	-2.3013	-3.0541	-0.292216	-0.766585	-1.61997	YES	-2.93059	-0.892923	2.03766
Olfr414	-3.43635	-2.3013	-3.46883	-0.824928	-1.1803	-1.08124	YES	-3.06883	-1.02882	2.04001
Vmn1r80	-1.65592	-2.3013	-2.73236	-0.134164	0.401131	-0.833948	YES	-2.22986	-0.188994	2.04087
Atp6v1b1	-2.67439	-3.49384	-4.05318	-1.08939	-1.38594	-1.61997	YES	-3.40714	-1.3651	2.04204
Gm6579	-4.05318	-4.05318	-4.05318	-1.67865	-2.08256	-2.26869	YES	-4.05318	-2.00997	2.04322
Vmn1r18	-2.40518	-1.79353	-1.88469	0.624371	-0.135727	-0.438838	YES	-2.0278	0.0166018	2.0444
Gm17535	0.764879	0.753908	1.57437	3.41278	3.46614	2.34971	YES	1.03105	3.07621	2.04516
Gm21269	-1.98245	-2.11149	-2.24714	0.682189	0.194952	-1.08124	YES	-2.11369	-0.0680319	2.04566
Topaz1	-3.43635	-2.3013	-2.73236	-0.469738	-1.08752	-0.760118	YES	-2.82334	-0.772459	2.05088
Gm47838	-3.00564	-2.77771	-3.46883	-0.90781	-0.696385	-1.49493	YES	-3.08406	-1.03304	2.05102
Vmn2r16	-3.43635	-2.51993	-1.88469	-0.601515	-0.00268741	-1.08124	YES	-2.61366	-0.561813	2.05185
Selp	-4.05318	-3.49384	-3.46883	-1.08939	-1.5009	-2.26869	YES	-3.67195	-1.61966	2.05229
Cd207	-4.05318	-4.05318	-3.46883	-1.41347	-1.5009	-2.48955	YES	-3.8584	-1.80131	2.0571
Olfr1295	-4.05318	-2.77771	-2.24714	-0.746549	-0.766585	-1.37986	YES	-3.02601	-0.964333	2.06168
Olfr487	-3.43635	-4.05318	-3.46883	-1.18954	-1.5009	-2.0772	YES	-3.65279	-1.58921	2.06358
Olfr1240	-4.05318	-4.05318	-3.0541	-1.29716	-1.91374	-1.75688	YES	-3.72016	-1.65593	2.06423
Olfr1310	-3.43635	-4.05318	-3.46883	-0.995746	-1.5009	-2.26869	YES	-3.65279	-1.58845	2.06434
Zfp616	-4.05318	-3.09179	-2.73236	-0.746549	-1.1803	-1.75688	YES	-3.29244	-1.22791	2.06453
Olfr1404	-4.05318	-3.09179	-3.46883	-1.29716	-1.5009	-1.61997	YES	-3.53794	-1.47268	2.06526
Olfr188-ps1	-4.05318	-2.3013	-3.0541	-0.824928	-0.766585	-1.61997	YES	-3.1362	-1.07049	2.0657
Slco6d1	-3.00564	-3.49384	-3.46883	-0.995746	-1.27946	-1.49493	YES	-3.32277	-1.25671	2.06606
Cyp2b10	-3.43635	-3.49384	-4.05318	-2.42425	-1.1803	-1.17408	YES	-3.66113	-1.59288	2.06825
D130009I18Rik	-2.40518	-2.11149	-4.05318	-0.348997	-0.840376	-1.17408	YES	-2.85662	-0.787817	2.0688
Cd19	-3.43635	-2.77771	-2.46945	-0.534122	-0.445452	-1.49493	YES	-2.8945	-0.824833	2.06967
Gm43891	-3.43635	-4.05318	-3.0541	-1.18954	-1.38594	-1.75688	YES	-3.51455	-1.44412	2.07043
Gm37150	-4.05318	-4.05318	-3.0541	-1.41347	-1.62583	-1.90817	YES	-3.72016	-1.64916	2.071
Olfr213	-3.43635	-3.49384	-3.46883	-1.18954	-0.918147	-2.0772	YES	-3.46634	-1.39496	2.07138
Olfr107	-4.05318	-3.49384	-4.05318	-1.67865	-2.08256	-1.61997	YES	-3.86674	-1.79373	2.07301
Vmn2r60	-2.67439	-1.79353	-3.0541	-0.134164	-0.334656	-0.833948	YES	-2.50734	-0.434256	2.07309
Vmn2r11	-3.43635	-2.77771	-2.73236	-0.534122	-1.27946	-0.911761	YES	-2.98214	-0.908447	2.07369
Vmn1r-ps144	-3.43635	-4.05318	-2.73236	-0.995746	-0.918147	-2.0772	YES	-3.4073	-1.33036	2.07694
AU018091	-3.43635	-3.09179	-4.05318	-1.29716	-1.76262	-1.2733	YES	-3.52711	-1.44436	2.08275
Vmn2r10	-3.43635	-1.65748	-2.46945	-0.184948	-0.135727	-0.994012	YES	-2.52109	-0.438229	2.08286
Olfr718-ps1	-4.05318	-4.05318	-3.46883	-1.18954	-1.38594	-2.75043	YES	-3.8584	-1.7753	2.0831
Olfr384	-4.05318	-3.09179	-3.46883	-1.41347	-1.76262	-1.17408	YES	-3.53794	-1.45005	2.08788
Vmn2r78	-3.43635	-2.11149	-3.46883	-1.08939	-0.388991	-1.2733	YES	-3.00556	-0.917229	2.08833
Pax1	-4.05318	-3.49384	-3.46883	-1.83209	-0.840376	-2.0772	YES	-3.67195	-1.58322	2.08873
Olfr373	-4.05318	-3.49384	-4.05318	-1.67865	-1.38594	-2.26869	YES	-3.86674	-1.77776	2.08898
AA414992	-0.882854	-1.94377	-1.14789	1.05473	0.552957	0.697251	YES	-1.32484	0.768312	2.09315
Sycp1	-2.67439	-4.05318	-4.05318	-1.08939	-1.91374	-1.49493	YES	-3.59359	-1.49935	2.09423
Gm48662	-4.05318	-3.49384	-3.46883	-1.18954	-1.62583	-1.90817	YES	-3.67195	-1.57451	2.09744
Skint7	-3.00564	-3.49384	-3.46883	-0.995746	-1.1803	-1.49493	YES	-3.32277	-1.22366	2.09912
Olfr1382	-3.43635	-3.09179	-3.46883	-0.67221	-1.38594	-1.61997	YES	-3.33233	-1.22604	2.10629
Acrv1	-4.05318	-4.05318	-3.46883	-1.41347	-1.76262	-2.0772	YES	-3.8584	-1.75109	2.10731
Vmn1r86	-2.40518	-2.51993	-4.05318	-1.08939	-0.565469	-0.994012	YES	-2.99276	-0.882958	2.10981
Gm19131	-4.05318	-3.09179	-4.05318	-1.83209	-1.27946	-1.75688	YES	-3.73272	-1.62281	2.10991
Cd244a	-3.43635	-2.77771	-3.0541	-0.746549	-0.918147	-1.2733	YES	-3.08939	-0.979333	2.11006
Vmn2r88	-3.43635	-3.49384	-4.05318	-1.18954	-1.1803	-2.26869	YES	-3.66113	-1.54618	2.11495
Gm5155	-4.05318	-3.49384	-4.05318	-1.41347	-1.76262	-2.0772	YES	-3.86674	-1.75109	2.11564
Mpo	-3.43635	-2.3013	-4.05318	-1.29716	-0.766585	-1.37986	YES	-3.26361	-1.14787	2.11574
Olfr1044	-4.05318	-4.05318	-3.46883	-1.08939	-1.38594	-2.75043	YES	-3.8584	-1.74192	2.11648
5930435M05Rik	-3.43635	-4.05318	-3.46883	-1.29716	-1.38594	-1.90817	YES	-3.65279	-1.53042	2.12237
Lrp2	-1.98245	-1.4187	-2.73236	0.624371	-0.00268741	-0.382354	YES	-2.0445	0.0797764	2.12428
Vmn1r218	-3.00564	-2.11149	-3.46883	0.0527858	-0.766585	-1.49493	YES	-2.86199	-0.736242	2.12575
Gm29966	-2.40518	-3.49384	-3.46883	-0.90781	-1.08752	-0.994012	YES	-3.12262	-0.996447	2.12617
Olfr1234	-3.43635	-3.49384	-4.05318	-1.18954	-1.5009	-1.90817	YES	-3.66113	-1.53287	2.12826
LOC100041057	-4.05318	-4.05318	-2.73236	-1.83209	-1.00035	-1.61997	YES	-3.61291	-1.48414	2.12877
4933440M02Rik	-3.00564	-4.05318	-3.0541	-1.08939	-1.00035	-1.61997	YES	-3.37098	-1.23657	2.13441
Gm48876	-4.05318	-3.49384	-4.05318	-2.00381	-1.27946	-1.90817	YES	-3.86674	-1.73048	2.13626
Gm17752	-2.67439	-3.49384	-3.0541	-0.348997	-0.840376	-1.61997	YES	-3.07411	-0.936447	2.13767
Mmp12	-3.43635	-2.77771	-2.73236	-1.18954	-0.504213	-0.833948	YES	-2.98214	-0.842567	2.13957
Olfr93	-4.05318	-4.05318	-4.05318	-1.18954	-2.2738	-2.26869	YES	-4.05318	-1.91068	2.14251
Gm43842	-4.05318	-4.05318	-3.0541	-1.83209	-1.27946	-1.61997	YES	-3.72016	-1.57717	2.14299
Iglv1	-4.05318	-4.05318	-4.05318	-2.19877	0.523843	-4.05318	YES	-4.05318	-1.90937	2.14381
Adam28	-2.67439	-2.51993	-1.73273	0.0527858	-0.0456852	-0.497624	YES	-2.30902	-0.163508	2.14551
Gm5581	-4.05318	-4.05318	-3.46883	-2.00381	-1.5009	-1.61997	YES	-3.8584	-1.70823	2.15017
Igkj5	-4.05318	-4.05318	-4.05318	-1.08939	-0.565469	-4.05318	YES	-4.05318	-1.90268	2.1505
Olfr1355	-4.05318	-4.05318	-4.05318	-1.29716	-1.91374	-2.48955	YES	-4.05318	-1.90015	2.15303
Gm47457	-4.05318	-4.05318	-2.46945	-0.995746	-1.5009	-1.61997	YES	-3.52527	-1.37221	2.15307
Olfr1312	-1.98245	-0.172082	-1.46975	1.11894	0.996142	0.723225	YES	-1.20809	0.946104	2.1542
Smok2a	-3.00564	-3.49384	-3.0541	-0.90781	-1.08752	-1.08124	YES	-3.18453	-1.02552	2.15901
V1rd19	-4.05318	-4.05318	-4.05318	-1.29716	-1.62583	-2.75043	YES	-4.05318	-1.89114	2.16204
Olfr1013	-3.43635	-3.09179	-3.0541	-0.995746	-0.918147	-1.17408	YES	-3.19408	-1.02932	2.16476
D730002M21Rik	-4.05318	-4.05318	-4.05318	-1.53998	-1.62583	-2.48955	YES	-4.05318	-1.88512	2.16807
Flg2	-3.00564	-4.05318	-2.73236	-0.237585	-1.76262	-1.2733	YES	-3.26373	-1.09117	2.17256
Vmn1r90	-1.80997	-2.11149	-1.46975	0.468795	0.49413	0.164346	YES	-1.79707	0.375757	2.17283
Olfr801	-3.43635	-3.49384	-4.05318	-0.995746	-1.38594	-2.0772	YES	-3.66113	-1.48629	2.17484
Olfr478	-3.43635	-4.05318	-4.05318	-1.18954	-1.91374	-1.90817	YES	-3.84757	-1.67048	2.17709
E130018O15Rik	-4.05318	-4.05318	-4.05318	-1.67865	-1.1803	-2.75043	YES	-4.05318	-1.86979	2.18339
Kif4-ps	-3.00564	-4.05318	-4.05318	-1.67865	-1.5009	-1.37986	YES	-3.704	-1.51981	2.1842
Nlrp5	-4.05318	-3.49384	-2.73236	-0.824928	-1.27946	-1.61997	YES	-3.42646	-1.24145	2.18501
Gm10648	-3.43635	-4.05318	-4.05318	-1.08939	-1.62583	-2.26869	YES	-3.84757	-1.6613	2.18627
Olfr1297	-3.43635	-2.3013	-2.46945	-0.184948	-0.696385	-0.760118	YES	-2.7357	-0.54715	2.18855
Gm37813	-4.05318	-4.05318	-3.46883	-0.824928	-1.91374	-2.26869	YES	-3.8584	-1.66912	2.18928
Olfr1467	-2.40518	-3.49384	-3.0541	-0.90781	-0.388991	-1.08124	YES	-2.98437	-0.792679	2.1917
Angpt4	-4.05318	-3.09179	-3.0541	-0.67221	-0.445452	-2.48955	YES	-3.39969	-1.2024	2.19729
Gm37142	-4.05318	-3.49384	-3.0541	-1.29716	-1.08752	-1.61997	YES	-3.53371	-1.33488	2.19883
Gm43166	-3.43635	-2.11149	-0.967345	0.366702	0.119113	-0.382354	YES	-2.17173	0.0344871	2.20622
Gm26704	-4.05318	-4.05318	-3.46883	-1.67865	-1.76262	-1.49493	YES	-3.8584	-1.6454	2.213
Olfr52	-4.05318	-4.05318	-4.05318	-1.83209	-1.1803	-2.48955	YES	-4.05318	-1.83398	2.21921
Tmem72	-2.67439	-1.94377	-2.73236	0.0959689	-0.090004	-0.689883	YES	-2.45017	-0.227973	2.2222
Olfr1250	-4.05318	-4.05318	-4.05318	-2.19877	-1.91374	-1.37986	YES	-4.05318	-1.83079	2.22239
Adgrg5	-4.05318	-4.05318	-4.05318	-1.83209	-1.38594	-2.26869	YES	-4.05318	-1.8289	2.22428
Olfr141	-4.05318	-4.05318	-4.05318	-1.83209	-1.38594	-2.26869	YES	-4.05318	-1.8289	2.22428
Serpinb9b	-3.00564	-3.49384	-2.46945	-0.408105	-0.696385	-1.17408	YES	-2.98965	-0.759522	2.23012
Gm10722	2.83398	2.75187	3.35861	5.59151	5.60278	4.44618	YES	2.98149	5.21349	2.232
Gm48832	-4.05318	-4.05318	-4.05318	-1.67865	-1.27946	-2.48955	YES	-4.05318	-1.81588	2.2373
Gm10720	2.45717	2.39298	3.05873	5.16698	5.33697	4.11694	YES	2.63629	4.87363	2.23734
Olfr339	-3.43635	-4.05318	-2.73236	-0.469738	-1.27946	-1.75688	YES	-3.4073	-1.16869	2.23861
Cnga1	-2.17838	-3.49384	-3.46883	-0.408105	-0.840376	-1.17408	YES	-3.04702	-0.807519	2.2395
Vmn2r14	-3.43635	-3.49384	-3.0541	-0.67221	-1.08752	-1.49493	YES	-3.3281	-1.08489	2.24322
D130079A08Rik	-2.40518	-3.09179	-3.0541	-0.348997	-0.629443	-0.833948	YES	-2.85036	-0.604129	2.24623
Spn	-4.05318	-4.05318	-3.0541	-0.746549	-0.918147	-2.75043	YES	-3.72016	-1.47171	2.24845
Gm31819	-3.43635	-4.05318	-4.05318	-1.08939	-1.62583	-2.0772	YES	-3.84757	-1.59747	2.2501
Fmo4	-3.43635	-4.05318	-2.46945	-0.90781	-0.918147	-1.37986	YES	-3.31966	-1.06861	2.25106
Gm43960	-3.43635	-2.77771	-2.73236	-0.408105	-0.696385	-1.08124	YES	-2.98214	-0.728575	2.25357
Olfr706	-4.05318	-2.51993	-4.05318	-1.18954	-1.1803	-1.49493	YES	-3.5421	-1.28826	2.25384
Gm43496	-4.05318	-3.49384	-3.46883	-0.90781	-0.840376	-2.48955	YES	-3.67195	-1.41258	2.25938
Olfr366	-3.43635	-3.09179	-4.05318	-1.18954	-0.840376	-1.75688	YES	-3.52711	-1.26227	2.26484
Sgcg	-3.43635	-2.77771	-3.46883	-0.601515	-1.00035	-1.2733	YES	-3.22763	-0.958389	2.26924
Hand2os1	-2.67439	-1.94377	-1.59526	0.533052	0.194952	-0.129	YES	-2.07114	0.199668	2.27081
Ccr4	-4.05318	-4.05318	-3.0541	-1.08939	-1.1803	-2.0772	YES	-3.72016	-1.44896	2.2712
Kpna7	-4.05318	-3.49384	-2.73236	-0.995746	-1.08752	-1.37986	YES	-3.42646	-1.15438	2.27209
Olfr704	-3.43635	-2.77771	-2.46945	-0.237585	-0.334656	-1.2733	YES	-2.8945	-0.615182	2.27932
Olfr736	-4.05318	-3.49384	-4.05318	-0.90781	-1.76262	-2.0772	YES	-3.86674	-1.58254	2.2842
Cyp3a11	-2.40518	-3.49384	-3.46883	-0.408105	-0.696385	-1.37986	YES	-3.12262	-0.828118	2.2945
Gm10719	1.79359	1.75255	2.6797	4.69511	4.74837	3.67973	YES	2.07528	4.37441	2.29913
Gm10717	5.03738	4.84598	5.64715	7.82984	7.89496	6.71522	YES	5.17684	7.48001	2.30317
Slc28a3	-2.40518	-2.11149	-3.46883	0.256831	-0.334656	-0.994012	YES	-2.66183	-0.357279	2.30455
Skint4	-2.40518	-3.49384	-3.46883	-0.348997	-1.00035	-1.08124	YES	-3.12262	-0.810194	2.31242
Gm10801	6.52111	6.52636	7.21615	9.45489	9.43914	8.31319	YES	6.75454	9.06907	2.31454
Pax7	-4.05318	-3.49384	-3.46883	-1.29716	-1.5009	-1.2733	YES	-3.67195	-1.35712	2.31483
Mep1a	-3.00564	-4.05318	-4.05318	-0.746549	-1.5009	-1.90817	YES	-3.704	-1.38521	2.3188
ENSMUSG00000095280	4.57347	4.45559	5.24304	7.43773	7.47619	6.3236	YES	4.75737	7.07917	2.32181
Gm44617	-4.05318	-4.05318	-3.46883	-0.601515	-1.91374	-2.0772	YES	-3.8584	-1.53082	2.32758
Gm11168	1.60833	1.21038	2.07429	4.26236	4.35883	3.28123	YES	1.631	3.96748	2.33648
Olfr488	-4.05318	-4.05318	-4.05318	-2.00381	-1.38594	-1.75688	YES	-4.05318	-1.71554	2.33764
Olfr600	-4.05318	-4.05318	-4.05318	-1.67865	-1.38594	-2.0772	YES	-4.05318	-1.71393	2.33926
Gm10800	9.55958	9.4596	10.2184	12.4472	12.51	11.2987	YES	9.74585	12.0853	2.33945
Wdr72	-3.43635	-2.77771	-2.73236	-0.292216	-0.445452	-1.17408	YES	-2.98214	-0.637248	2.34489
Cxcl13	-3.00564	-4.05318	-3.0541	-0.134164	-0.445452	-2.48955	YES	-3.37098	-1.02305	2.34792
Ankrd36	-4.05318	-3.49384	-3.46883	-1.29716	-0.766585	-1.90817	YES	-3.67195	-1.32397	2.34798
Vmn1r16	-4.05318	-3.09179	-3.0541	-0.824928	-0.565469	-1.75688	YES	-3.39969	-1.04909	2.3506
Olfr728	-4.05318	-2.51993	-2.73236	-0.134164	-0.840376	-1.2733	YES	-3.10182	-0.749281	2.35254
Gm10718	1.05996	0.848372	1.57437	3.82577	3.85895	2.86917	YES	1.1609	3.51796	2.35706			8.857	0.1176
Dsg3	-2.40518	-3.49384	-3.46883	-0.534122	-0.840376	-0.911761	YES	-3.12262	-0.762087	2.36053			8.565	0.3747
Lvrn	-4.05318	-3.49384	-2.46945	-0.237585	-1.1803	-1.49493	YES	-3.33883	-0.970937	2.36789
Olfr524	-4.05318	-3.09179	-4.05318	-1.41347	-0.918147	-1.75688	YES	-3.73272	-1.36283	2.36989
Cnpy1	-2.67439	-3.49384	-4.05318	-1.08939	-0.840376	-1.17408	YES	-3.40714	-1.03461	2.37253		6M	1	0.0132776
Gm10715	1.78015	1.48489	2.26693	4.60082	4.59235	3.45792	YES	1.84399	4.21703	2.37304		24M	0.967032	0.0423055
Gm10721	-0.0587804	-0.219216	0.230472	2.70514	2.83265	1.57357	YES	-0.0158412	2.37045	2.38629
Vmn1r219	-4.05318	-2.51993	-2.73236	-0.134164	-0.918147	-1.08124	YES	-3.10182	-0.711182	2.39064
Gm50348	-4.05318	-4.05318	-3.46883	-1.08939	-1.00035	-2.26869	YES	-3.8584	-1.45281	2.40559
A530053G22Rik	-3.43635	-3.49384	-2.46945	-0.90781	-0.282294	-0.911761	YES	-3.13322	-0.700622	2.43259
Vmn2r71	-4.05318	-4.05318	-3.46883	-0.824928	-1.5009	-1.90817	YES	-3.8584	-1.41133	2.44707
Olfr229	-4.05318	-4.05318	-4.05318	-1.41347	-1.76262	-1.61997	YES	-4.05318	-1.59868	2.4545
Ms4a1	-3.43635	-3.09179	-2.46945	-0.0851066	-0.445452	-1.08124	YES	-2.9992	-0.537265	2.46193
Olfr13	-4.05318	-4.05318	-4.05318	-1.53998	-1.38594	-1.75688	YES	-4.05318	-1.56093	2.49225
Vmn2r89	-3.00564	-2.11149	-4.05318	0.00827018	-0.696385	-0.994012	YES	-3.05677	-0.560709	2.49606
Keg1	-4.05318	-3.49384	-2.73236	-0.824928	-0.565469	-1.37986	YES	-3.42646	-0.92342	2.50304
Tcp10c	-3.43635	-2.77771	-3.46883	-0.824928	-0.231766	-1.08124	YES	-3.22763	-0.712643	2.51499
Lrrc8e	-3.43635	-4.05318	-2.73236	-0.746549	-0.766585	-0.994012	YES	-3.4073	-0.835715	2.57158
Olfr1225	-3.43635	-2.77771	-3.0541	-0.746549	-0.388991	-0.382354	YES	-3.08939	-0.505965	2.58342
Kcnv2	-4.05318	-4.05318	-2.73236	-0.824928	-1.1803	-1.08124	YES	-3.61291	-1.02882	2.58409
Obox3-ps7	-1.06486	-1.4187	-1.73273	0.940913	1.19393	1.40729	YES	-1.40543	1.18071	2.58614
Ighv1-53	-4.05318	-4.05318	-3.46883	-0.184948	0.523843	-4.05318	YES	-3.8584	-1.2381	2.6203
Vmn1r236	-4.05318	-4.05318	-3.0541	-0.184948	-1.27946	-1.61997	YES	-3.72016	-1.02812	2.69203
Themis	-2.40518	-2.51993	-1.73273	0.764791	0.636931	0.0864383	YES	-2.21928	0.496053	2.71533
Smok2b	-4.05318	-3.49384	-3.0541	-0.184948	-1.00035	-1.17408	YES	-3.53371	-0.786458	2.74725
Ccl8	-2.67439	-2.3013	-1.73273	2.89438	1.05838	-2.26869	YES	-2.23614	0.561355	2.7975
Gm44049	-4.05318	-4.05318	-4.05318	-0.348997	-1.5009	-1.75688	YES	-4.05318	-1.20226	2.85092
Igkc	-2.40518	-2.11149	-0.884895	4.334	4.63892	0.125918	YES	-1.80052	3.03295	4.83347
Igkv4-55	-4.05318	-3.49384	-4.05318	2.74638	2.89082	-2.0772	YES	-3.86674	1.18667	5.05341
