# Supplementary material for: Decoupling of mRNA and Protein Expression in Aging Brains Reveals the Age-Dependent Adaptation of Specific Gene Subsets
Source: Cells. 2023 Feb 14;12(4):615. doi: 10.3390/cells12040615 (PMC9954025; doi:10.3390/cells12040615)
Supplement: Supplementary file 1 [file cells-12-00615-s001.zip › Khatir et al. Supplemental Table S3.xlsx]

## Sheet: Original data
Protein IDs	Majority protein IDs	Peptide counts (all)	Peptide counts (razor+unique)	Peptide counts (unique)	Protein names	Gene names	Fasta headers	Number of proteins	Peptides	Razor + unique peptides	Unique peptides	Peptides Cx6_1	Peptides Cx6_2	Peptides Cx24_1	Peptides Cx24_2	Razor + unique peptides Cx6_1	Razor + unique peptides Cx6_2	Razor + unique peptides Cx24_1	Razor + unique peptides Cx24_2	Unique peptides Cx6_1	Unique peptides Cx6_2	Unique peptides Cx24_1	Unique peptides Cx24_2	Sequence coverage [%]	Unique + razor sequence coverage [%]	Unique sequence coverage [%]	Mol. weight [kDa]	Sequence length	Sequence lengths	Fraction average	Fraction 1	Fraction 2	Fraction 3	Fraction 4	Q-value	Score	Sequence coverage Cx6_1 [%]	Sequence coverage Cx6_2 [%]	Sequence coverage Cx24_1 [%]	Sequence coverage Cx24_2 [%]	Intensity	Intensity Cx6_1	Intensity Cx6_2	Intensity Cx24_1	Intensity Cx24_2	LFQ intensity Cx6_1	LFQ intensity Cx6_2	LFQ intensity Cx24_1	LFQ intensity Cx24_2
A0A1W2P872;Q9JKN6	A0A1W2P872;Q9JKN6	5;3	5;3	5;3	RNA-binding protein Nova-1	Nova1	sp|A0A1W2P872|NOVA2_MOUSE RNA-binding protein Nova-2 OS=Mus musculus OX=10090 GN=Nova2 PE=1 SV=1;sp|Q9JKN6|NOVA1_MOUSE RNA-binding protein Nova-1 OS=Mus musculus OX=10090 GN=Nova1 PE=1 SV=2	2	5	5	5	0	0	4	4	0	0	4	4	0	0	4	4	13.8	13.8	13.8	49.066	492	492;507	2		8			0	31.817	0	0	10.2	11.8	122690000	0	0	57789000	64905000	0	0	32261000	30043000
A2A432;Q3TCH7	A2A432;Q3TCH7	4;2	4;2	4;2	Cullin-4B;Cullin-4A	Cul4b;Cul4a	sp|A2A432|CUL4B_MOUSE Cullin-4B OS=Mus musculus OX=10090 GN=Cul4b PE=1 SV=1;sp|Q3TCH7|CUL4A_MOUSE Cullin-4A OS=Mus musculus OX=10090 GN=Cul4a PE=1 SV=1	2	4	4	4	0	3	0	1	0	3	0	1	0	3	0	1	4.3	4.3	4.3	110.7	970	970;759	1	4				0.00076805	24.728	0	3.1	0	1.2	36218000	0	24718000	0	11500000	0	0	0	0
A2A690	A2A690	4	4	4	Protein TANC2	Tanc2	sp|A2A690|TANC2_MOUSE Protein TANC2 OS=Mus musculus OX=10090 GN=Tanc2 PE=1 SV=1	1	4	4	4	0	2	1	2	0	2	1	2	0	2	1	2	2.2	2.2	2.2	220.26	1994	1994	1	5				0.00072622	23.256	0	0.9	0.5	1.3	27776000	0	11404000	3927800	12445000	0	0	0	0
A2A935	A2A935	1	1	1	PR domain zinc finger protein 16	Prdm16	sp|A2A935|PRD16_MOUSE Histone-lysine N-methyltransferase PRDM16 OS=Mus musculus OX=10090 GN=Prdm16 PE=1 SV=1	1	1	1	1	1	1	1	1	1	1	1	1	1	1	1	1	0.7	0.7	0.7	140.86	1275	1275	2.64	1	6	4	3	0.0034305	6.447	0.7	0.7	0.7	0.7	590860000	137220000	40218000	182550000	230870000	279390000	0	194070000	219540000
A2AAJ9	A2AAJ9	1	1	1	Obscurin	Obscn	sp|A2AAJ9|OBSCN_MOUSE Obscurin OS=Mus musculus OX=10090 GN=Obscn PE=1 SV=3	1	1	1	1	0	1	1	1	0	1	1	1	0	1	1	1	0.1	0.1	0.1	966.58	8886	8886	4				3	0.0011148	13.394	0	0.1	0.1	0.1	352370000	0	201240000	132690000	18445000	0	0	0	0
A2AG50	A2AG50	1	1	1	MAP7 domain-containing protein 2	Map7d2	sp|A2AG50|MA7D2_MOUSE MAP7 domain-containing protein 2 OS=Mus musculus OX=10090 GN=Map7d2 PE=1 SV=1	1	1	1	1	0	0	0	1	0	0	0	1	0	0	0	1	1	1	1	86.049	781	781	1	1				0.0082136	6.2258	0	0	0	1	2911600	0	0	0	2911600	0	0	0	0
A2AGT5	A2AGT5	14	14	14	Cytoskeleton-associated protein 5	Ckap5	sp|A2AGT5|CKAP5_MOUSE Cytoskeleton-associated protein 5 OS=Mus musculus OX=10090 GN=Ckap5 PE=1 SV=1	1	14	14	14	0	13	0	5	0	13	0	5	0	13	0	5	8.2	8.2	8.2	225.63	2032	2032	1	18				0	88.675	0	7.5	0	3.1	232920000	0	175850000	0	57064000	0	27970000	0	22540000
A2AHC3	A2AHC3	2	2	2	Calmodulin-regulated spectrin-associated protein 1	Camsap1	sp|A2AHC3|CAMP1_MOUSE Calmodulin-regulated spectrin-associated protein 1 OS=Mus musculus OX=10090 GN=Camsap1 PE=1 SV=1	1	2	2	2	0	1	0	1	0	1	0	1	0	1	0	1	2	2	2	175.89	1581	1581	1	2				0.0014078	11.311	0	1.2	0	0.8	10547000	0	8073800	0	2473500	0	0	0	0
A2AHG0	A2AHG0	2	2	2	Leucine zipper putative tumor suppressor 3	Lzts3	sp|A2AHG0|LZTS3_MOUSE Leucine zipper putative tumor suppressor 3 OS=Mus musculus OX=10090 GN=Lzts3 PE=1 SV=1	1	2	2	2	0	2	0	0	0	2	0	0	0	2	0	0	2.7	2.7	2.7	74.985	700	700	1	2				0.0014479	11.534	0	2.7	0	0	10240000	0	10240000	0	0	0	0	0	0
A2AJA9	A2AJA9	6	6	6	Uncharacterized protein C9orf172 homolog	Gm996	sp|A2AJA9|AJM1_MOUSE Apical junction component 1 homolog OS=Mus musculus OX=10090 GN=Ajm1 PE=1 SV=1	1	6	6	6	0	4	0	2	0	4	0	2	0	4	0	2	7	7	7	107.18	974	974	1	6				0	35.695	0	4.7	0	2.3	41658000	0	34193000	0	7464500	0	0	0	0
A2ALS5	A2ALS5	6	6	5	Rap1 GTPase-activating protein 1	Rap1gap	sp|A2ALS5|RPGP1_MOUSE Rap1 GTPase-activating protein 1 OS=Mus musculus OX=10090 GN=Rap1gap PE=1 SV=2	1	6	6	5	0	6	0	3	0	6	0	3	0	5	0	3	8.9	8.9	7.8	73.432	663	663	1	9				0	37.066	0	8.9	0	4.7	162250000	0	126430000	0	35817000	0	29762000	0	25215000
A2ALU4;Q9QXN0;Q1W617	A2ALU4;Q9QXN0;Q1W617	2;1;1	2;1;1	2;1;1	Protein Shroom2;Protein Shroom3;Protein Shroom4	Shroom2;Shroom3;Shroom4	sp|A2ALU4|SHRM2_MOUSE Protein Shroom2 OS=Mus musculus OX=10090 GN=Shroom2 PE=1 SV=1;sp|Q9QXN0|SHRM3_MOUSE Protein Shroom3 OS=Mus musculus OX=10090 GN=Shroom3 PE=1 SV=2;sp|Q1W617|SHRM4_MOUSE Protein Shroom4 OS=Mus musculus OX=10090 GN=Shroom4 PE=1 SV=1	3	2	2	2	0	0	2	2	0	0	2	2	0	0	2	2	1.5	1.5	1.5	164.7	1481	1481;1986;1475	2		4			0.0010823	12.797	0	0	1.5	1.5	29775000	0	0	11283000	18492000	0	0	8588600	12623000
A2AN08	A2AN08	3	3	3	E3 ubiquitin-protein ligase UBR4	Ubr4	sp|A2AN08|UBR4_MOUSE E3 ubiquitin-protein ligase UBR4 OS=Mus musculus OX=10090 GN=Ubr4 PE=1 SV=1	1	3	3	3	0	3	0	0	0	3	0	0	0	3	0	0	0.6	0.6	0.6	572.28	5180	5180	1	3				0.0012019	17.373	0	0.6	0	0	16667000	0	16667000	0	0	0	0	0	0
A2AP18	A2AP18	2	2	2	1-phosphatidylinositol 4,5-bisphosphate phosphodiesterase eta-2	Plch2	sp|A2AP18|PLCH2_MOUSE 1-phosphatidylinositol 4,5-bisphosphate phosphodiesterase eta-2 OS=Mus musculus OX=10090 GN=Plch2 PE=1 SV=2	1	2	2	2	0	1	0	1	0	1	0	1	0	1	0	1	1.8	1.8	1.8	164.3	1501	1501	1	2				0.0014293	11.424	0	0.9	0	0.9	13509000	0	8902000	0	4607100	0	0	0	0
A2APX8	A2APX8	5	1	1	Sodium channel protein	Scn1a	sp|A2APX8|SCN1A_MOUSE Sodium channel protein type 1 subunit alpha OS=Mus musculus OX=10090 GN=Scn1a PE=1 SV=1	1	5	1	1	1	5	0	0	0	1	0	0	0	1	0	0	2.9	0.6	0.6	228.8	2009	2009	1	1				0.0030043	6.4552	0.6	2.9	0	0	6523400	0	6523400	0	0	0	0	0	0
A2AQ25	A2AQ25	8	8	8	Sickle tail protein	Skt	sp|A2AQ25|SKT_MOUSE Sickle tail protein OS=Mus musculus OX=10090 GN=Skt PE=1 SV=1	1	8	8	8	0	8	0	2	0	8	0	2	0	8	0	2	4.8	4.8	4.8	213.03	1946	1946	1	10				0	48.343	0	4.8	0	1.4	136440000	0	111950000	0	24485000	0	33455000	0	15393000
A2ASS6	A2ASS6	3	3	3	Titin	Ttn	sp|A2ASS6|TITIN_MOUSE Titin OS=Mus musculus OX=10090 GN=Ttn PE=1 SV=1	1	3	3	3	1	0	2	1	1	0	2	1	1	0	2	1	0.1	0.1	0.1	3906.4	35213	35213	2.5	2			2	0.0012461	17.894	0.1	0	0.1	0.1	67182000	27388000	0	38679000	1114600	0	0	0	0
A2ASZ8	A2ASZ8	3	2	2	Calcium-binding mitochondrial carrier protein SCaMC-2	Slc25a25	sp|A2ASZ8|SCMC2_MOUSE Calcium-binding mitochondrial carrier protein SCaMC-2 OS=Mus musculus OX=10090 GN=Slc25a25 PE=1 SV=1	1	3	2	2	0	0	1	2	0	0	0	2	0	0	0	2	6	4.3	4.3	52.62	469	469	2		2			0.0014493	11.544	0	0	1.7	4.3	18798000	0	0	0	18798000	0	0	0	0
A2AUM9	A2AUM9	2	2	2	Centrosomal protein of 152 kDa	Cep152	sp|A2AUM9|CE152_MOUSE Centrosomal protein of 152 kDa OS=Mus musculus OX=10090 GN=Cep152 PE=1 SV=1	1	2	2	2	0	0	0	2	0	0	0	2	0	0	0	2	1.5	1.5	1.5	196.53	1736	1736	1.5	1	1			0.001387	11.036	0	0	0	1.5	18962000	0	0	0	18962000	0	0	0	0
A2CG49	A2CG49	6	3	3	Kalirin	Kalrn	sp|A2CG49|KALRN_MOUSE Kalirin OS=Mus musculus OX=10090 GN=Kalrn PE=1 SV=1	1	6	3	3	0	5	0	3	0	2	0	1	0	2	0	1	2.3	1.3	1.3	337	2964	2964	1	3				0.0012804	18.296	0	1.9	0	1.1	45724000	0	26423000	0	19301000	0	0	0	0
A2RT62	A2RT62	7	7	7	F-box/LRR-repeat protein 16	Fbxl16	sp|A2RT62|FXL16_MOUSE F-box/LRR-repeat protein 16 OS=Mus musculus OX=10090 GN=Fbxl16 PE=1 SV=1	1	7	7	7	2	0	5	6	2	0	5	6	2	0	5	6	17.5	17.5	17.5	51.878	479	479	2.13		13	2		0	44.051	4.6	0	11.1	15.9	292770000	11088000	0	118460000	163220000	30826000	0	38637000	41428000
A6H5Z3	A6H5Z3	1	1	1	Exocyst complex component 6B	Exoc6b	sp|A6H5Z3|EXC6B_MOUSE Exocyst complex component 6B OS=Mus musculus OX=10090 GN=Exoc6b PE=1 SV=1	1	1	1	1	0	1	0	1	0	1	0	1	0	1	0	1	1.4	1.4	1.4	94.128	810	810	1	2				0.0082474	6.2426	0	1.4	0	1.4	10526000	0	5175400	0	5350300	0	0	0	0
A6H6A9	A6H6A9	2	2	2	Rab GTPase-activating protein 1-like	Rabgap1l	sp|A6H6A9|RBG1L_MOUSE Rab GTPase-activating protein 1-like OS=Mus musculus OX=10090 GN=Rabgap1l PE=1 SV=1	1	2	2	2	0	2	0	0	0	2	0	0	0	2	0	0	2.3	2.3	2.3	92.403	815	815	1	2				0.0013973	11.186	0	2.3	0	0	8408600	0	8408600	0	0	0	0	0	0
A6X8Z5	A6X8Z5	2	2	2	Rho GTPase-activating protein 31	Arhgap31	sp|A6X8Z5|RHG31_MOUSE Rho GTPase-activating protein 31 OS=Mus musculus OX=10090 GN=Arhgap31 PE=1 SV=1	1	2	2	2	0	1	0	1	0	1	0	1	0	1	0	1	1.5	1.5	1.5	155.27	1425	1425	1.5	1	1			0.0009704	11.569	0	0.8	0	0.7	84123000	0	8270400	0	75852000	0	0	0	0
B0V2N1	B0V2N1	5	4	4	Receptor-type tyrosine-protein phosphatase S	Ptprs	sp|B0V2N1|PTPRS_MOUSE Receptor-type tyrosine-protein phosphatase S OS=Mus musculus OX=10090 GN=Ptprs PE=1 SV=1	1	5	4	4	0	5	2	3	0	4	1	2	0	4	1	2	3.1	2.6	2.6	211.9	1907	1907	1.29	5	2			0.00074074	23.874	0	3.1	1.2	1.8	108510000	0	63229000	14320000	30964000	0	18721000	0	22657000
B1AS29	B1AS29	2	2	2	Glutamate receptor ionotropic, kainate 3	Grik3	sp|B1AS29|GRIK3_MOUSE Glutamate receptor ionotropic, kainate 3 OS=Mus musculus OX=10090 GN=Grik3 PE=1 SV=1	1	2	2	2	0	2	0	0	0	2	0	0	0	2	0	0	2.4	2.4	2.4	104.05	919	919	1	2				0.00097704	11.617	0	2.4	0	0	7574700	0	7574700	0	0	0	0	0	0
B1AWN6;A2ASI5;Q62205;Q9ER60	B1AWN6;A2ASI5	12;6;2;2	12;6;2;2	8;2;1;1	Sodium channel protein	Scn2a1;Scn3a	sp|B1AWN6|SCN2A_MOUSE Sodium channel protein type 2 subunit alpha OS=Mus musculus OX=10090 GN=Scn2a PE=1 SV=1;sp|A2ASI5|SCN3A_MOUSE Sodium channel protein type 3 subunit alpha OS=Mus musculus OX=10090 GN=Scn3a PE=1 SV=1	4	12	12	8	3	12	4	3	3	12	4	3	2	8	4	3	7.4	7.4	5.1	227.94	2006	2006;1947;1984;1841	1.27	19		3		0	75.408	1.6	7.4	2.1	1.6	305040000	25857000	216190000	33239000	29755000	43672000	31916000	37186000	27778000
B1AXV0	B1AXV0	5	5	5	DOMON domain-containing protein FRRS1L	Frrs1l	sp|B1AXV0|FRS1L_MOUSE DOMON domain-containing protein FRRS1L OS=Mus musculus OX=10090 GN=Frrs1l PE=1 SV=1	1	5	5	5	0	5	0	1	0	5	0	1	0	5	0	1	22.5	22.5	22.5	32.506	293	293	3			6		0	32.221	0	22.5	0	4.1	135470000	0	122540000	0	12932000	0	0	0	0
B1AY13	B1AY13	2	2	2	Ubiquitin carboxyl-terminal hydrolase 24	Usp24	sp|B1AY13|UBP24_MOUSE Ubiquitin carboxyl-terminal hydrolase 24 OS=Mus musculus OX=10090 GN=Usp24 PE=1 SV=1	1	2	2	2	0	1	0	1	0	1	0	1	0	1	0	1	1.1	1.1	1.1	294	2617	2617	1	2				0.0014306	11.432	0	0.4	0	0.7	45314000	0	39462000	0	5851700	0	0	0	0
B2RSH2;P20612;P50149;Q3V3I2	B2RSH2	8;2;2;2	6;1;1;1	5;0;0;0	Guanine nucleotide-binding protein G(i) subunit alpha-1	Gnai1	sp|B2RSH2|GNAI1_MOUSE Guanine nucleotide-binding protein G(i) subunit alpha-1 OS=Mus musculus OX=10090 GN=Gnai1 PE=1 SV=1	4	8	6	5	4	5	7	8	2	3	5	6	1	2	4	5	25.1	18.6	16.4	40.361	354	354;350;354;354	2.41		16	11		0	49.21	13.3	17.5	20.9	25.1	604860000	13384000	30971000	339600000	220910000	44776000	80358000	131870000	111580000
B5TVM2	B5TVM2	2	2	2	Immunoglobulin-like domain-containing receptor 2	Ildr2	sp|B5TVM2|ILDR2_MOUSE Immunoglobulin-like domain-containing receptor 2 OS=Mus musculus OX=10090 GN=Ildr2 PE=1 SV=2	1	2	2	2	0	0	0	2	0	0	0	2	0	0	0	2	3.3	3.3	3.3	73.235	661	661	2		2			0.0010209	12.022	0	0	0	3.3	12267000	0	0	0	12267000	0	0	0	0
B9EJ86;Q9ER64	B9EJ86	3;1	3;1	3;1	Oxysterol-binding protein	Osbpl8	sp|B9EJ86|OSBL8_MOUSE Oxysterol-binding protein-related protein 8 OS=Mus musculus OX=10090 GN=Osbpl8 PE=1 SV=1	2	3	3	3	0	3	0	2	0	3	0	2	0	3	0	2	3.5	3.5	3.5	101.27	889	889;874	1	5				0.0013369	19.201	0	3.5	0	2.2	43579000	0	33402000	0	10176000	0	12484000	0	9394600
B9EJA2	B9EJA2	6	6	6	Cortactin-binding protein 2	Cttnbp2	sp|B9EJA2|CTTB2_MOUSE Cortactin-binding protein 2 OS=Mus musculus OX=10090 GN=Cttnbp2 PE=1 SV=2	1	6	6	6	0	6	0	2	0	6	0	2	0	6	0	2	4.4	4.4	4.4	178.77	1648	1648	1	8				0	35.345	0	4.4	0	1.6	94619000	0	69402000	0	25217000	0	18357000	0	19270000
B9EKR1	B9EKR1	10	10	10	Receptor-type tyrosine-protein phosphatase zeta	Ptprz1	sp|B9EKR1|PTPRZ_MOUSE Receptor-type tyrosine-protein phosphatase zeta OS=Mus musculus OX=10090 GN=Ptprz1 PE=1 SV=1	1	10	10	10	3	9	4	4	3	9	4	4	3	9	4	4	4.7	4.7	4.7	254.4	2312	2312	1.33	19	7	1		0	99.132	1.4	4.4	1.8	2	1730500000	122470000	838200000	267860000	502000000	176650000	237360000	142670000	201570000
Q8CGP5;Q8R1M2;Q8CGP7;Q8BFU2;Q8CGP6;C0HKE9;C0HKE8;C0HKE7;C0HKE6;C0HKE5;C0HKE4;C0HKE3;C0HKE2;C0HKE1;Q6GSS7;Q64523	Q8CGP5;Q8R1M2;Q8CGP7;Q8BFU2;Q8CGP6;C0HKE9;C0HKE8;C0HKE7;C0HKE6;C0HKE5;C0HKE4;C0HKE3;C0HKE2;C0HKE1;Q6GSS7;Q64523	4;4;4;4;4;4;4;4;4;4;4;4;4;4;3;3	4;4;4;4;4;4;4;4;4;4;4;4;4;4;3;3	2;2;2;2;2;2;2;2;2;2;2;2;2;2;1;1	Histone H2A type 1-F;Histone H2A.J;Histone H2A type 1-K;Histone H2A type 3;Histone H2A type 1-H;Histone H2A type 2-A;Histone H2A type 2-C	Hist1h2af;H2afj;Hist1h2ak;Hist3h2a;Hist1h2ah;Hist2h2aa1;Hist2h2ac	sp|Q8CGP5|H2A1F_MOUSE Histone H2A type 1-F OS=Mus musculus OX=10090 GN=Hist1h2af PE=1 SV=3;sp|Q8R1M2|H2AJ_MOUSE Histone H2A.J OS=Mus musculus OX=10090 GN=H2aj PE=1 SV=1;sp|Q8CGP7|H2A1K_MOUSE Histone H2A type 1-K OS=Mus musculus OX=10090 GN=H2ac15 PE=1 SV=3	16	4	4	2	3	4	3	3	3	4	3	3	1	2	1	1	35.4	35.4	23.1	14.161	130	130;129;130;130;128;130;130;130;130;130;130;130;130;130;130;129	3.27	3	2	9	16	0	323.31	26.9	35.4	26.9	26.9	12411000000	3608800000	5770600000	1187500000	1844100000	5078600000	4301800000	2681100000	4933800000
CON__ENSEMBL:ENSBTAP00000038253	CON__ENSEMBL:ENSBTAP00000038253	11	2	2				1	11	2	2	9	9	11	10	1	1	2	2	1	1	2	2	15.3	2.5	2.5	63.165	606	606	2.33	3	3	5	1	0.0011696	16.813	13.5	13.5	15.3	13.5	458260000	17539000	92827000	96522000	251370000	0	0	100020000	346380000
Q9ERE2;P97861;CON__O43790;CON__Q14533	Q9ERE2;P97861;CON__O43790;CON__Q14533	1;1;1;1	1;1;1;1	1;1;1;1	Keratin, type II cuticular Hb1;Keratin, type II cuticular Hb6	Krt81;Krt86	sp|Q9ERE2|KRT81_MOUSE Keratin, type II cuticular Hb1 OS=Mus musculus OX=10090 GN=Krt81 PE=2 SV=2;sp|P97861|KRT86_MOUSE Keratin, type II cuticular Hb6 OS=Mus musculus OX=10090 GN=Krt86 PE=2 SV=2;;	4	1	1	1	0	1	1	0	0	1	1	0	0	1	1	0	1.7	1.7	1.7	52.862	481	481;486;486;505	1.5	1	1			0.0021939	6.7124	0	1.7	1.7	0	64418000	0	20531000	43886000	0	0	0	0	0
CON__P00761	CON__P00761	3	3	3				1	3	3	3	2	2	3	2	2	2	3	2	2	2	3	2	16.5	16.5	16.5	24.409	231	231	2.88	7	5	14	14	0	262.3	7.8	7.8	16.5	7.8	119580000000	28105000000	27754000000	41735000000	21989000000	57461000000	31069000000	66428000000	39129000000
CON__P01966;P06467	CON__P01966	3;1	1;0	1;0				2	3	1	1	3	3	3	3	1	1	1	1	1	1	1	1	16.9	10.6	10.6	15.184	142	142;142	2.71	4	1	4	5	0.0013806	10.422	16.9	16.9	16.9	16.9	17456000000	5907000000	7976600000	1894500000	1677400000	0	0	0	0
CON__P02533;Q6IFX2;CON__Q6IFX2	CON__P02533;Q6IFX2;CON__Q6IFX2	28;15;15	22;14;14	6;4;4	Keratin, type I cytoskeletal 42	Krt42	;sp|Q6IFX2|K1C42_MOUSE Keratin, type I cytoskeletal 42 OS=Mus musculus OX=10090 GN=Krt42 PE=1 SV=1;	3	28	22	6	19	25	22	19	14	19	17	14	3	6	6	6	43.9	40	12.7	51.621	472	472;452;452	2.31	41	26	30	24	0	245.47	37.9	37.5	36.9	30.5	7231600000	1815700000	2550100000	1912400000	953350000	992430000	503530000	448860000	207200000
P02535;CON__P02535-1	P02535;CON__P02535-1	12;12	1;1	0;0	Keratin, type I cytoskeletal 10	Krt10	sp|P02535|K1C10_MOUSE Keratin, type I cytoskeletal 10 OS=Mus musculus OX=10090 GN=Krt10 PE=1 SV=3;	2	12	1	0	9	12	11	7	0	1	0	0	0	0	0	0	15.4	1.6	0	57.769	570	570;570	1	1				1	-2	13.5	15.4	13.9	10.9	26284000	0	26284000	0	0	0	0	0	0
CON__P02538;CON__O95678;Q8VED5;CON__Q8VED5;CON__P05787;Q99M73;CON__H-INV:HIT000292931	CON__P02538	38;10;7;7;6;4;2	20;3;1;1;1;1;1	2;0;0;0;0;0;0				7	38	20	2	21	29	27	27	10	13	15	15	2	2	2	2	49.3	31	3.5	60.044	564	564;551;531;531;483;603;443	2.35	26	29	24	18	0	197.95	32.8	40.2	38.1	45	3762200000	912410000	792750000	1093300000	963730000	559690000	230180000	287840000	146170000
CON__P02662	CON__P02662	3	3	3				1	3	3	3	3	3	3	3	3	3	3	3	3	3	3	3	18.6	18.6	18.6	22.975	199	199	2.29	10	3	12	3	0	48.005	18.6	18.6	18.6	18.6	2585800000	1660900000	326870000	291850000	306090000	1245800000	142390000	193070000	407000000
CON__P02663	CON__P02663	4	4	4				1	4	4	4	4	2	3	3	4	2	3	3	4	2	3	3	15	15	15	24.348	207	207	2.28	10	2	9	4	0	32.916	15	9.2	14.5	14.5	1638700000	1325700000	126330000	114230000	72470000	794900000	31568000	58926000	38815000
CON__P02666	CON__P02666	3	3	3				1	3	3	3	3	2	2	1	3	2	2	1	3	2	2	1	15.8	15.8	15.8	23.583	209	209	2.57	4	1	6	3	0	35.468	15.8	12.4	12.4	3.3	1300100000	1142500000	90656000	38454000	28466000	1088600000	56903000	49076000	0
CON__P02668	CON__P02668	4	4	4				1	4	4	4	4	1	0	0	4	1	0	0	4	1	0	0	33.7	33.7	33.7	18.974	169	169	2.6	5		6	4	0	68.099	33.7	5.9	0	0	3583100000	3498500000	84589000	0	0	0	0	0	0
CON__P02754	CON__P02754	3	3	3				1	3	3	3	1	2	1	1	1	2	1	1	1	2	1	1	17.9	17.9	17.9	18.281	162	162	2.83	2		1	3	0.0012682	18.121	6.2	13	4.9	6.2	100270000	40144000	29846000	21702000	8574700	0	0	0	0
CON__P02768-1	CON__P02768-1	9	8	7				1	9	8	7	0	7	2	3	0	7	2	2	0	7	2	1	13.5	12	9.5	69.366	609	609	1.45	7	3	1		0	51.33	0	9.5	3.6	5.9	289750000	0	211720000	17268000	60757000	0	80977000	19941000	0
CON__P02769	CON__P02769	2	1	1				1	2	1	1	1	1	1	2	1	1	1	1	1	1	1	1	4.6	2.1	2.1	69.293	607	607	1.9	3	5	2		0.0014225	22.017	2.1	2.1	2.1	4.6	1211600000	299840000	106330000	320900000	484510000	988470000	0	0	513410000
CON__P04259	CON__P04259	37	2	2				1	37	2	2	19	27	25	26	0	0	0	2	0	0	0	2	44.5	2.7	2.7	59.998	564	564	2		2			0.001087	12.882	28	35.5	33.3	40.2	26580000	0	0	0	26580000	0	0	0	0
CON__P04264;CON__H-INV:HIT000016045	CON__P04264	50;2	47;2	31;0				2	50	47	31	36	48	45	40	34	45	42	37	25	30	27	26	48.6	48.6	37.6	66.017	644	644;99	2.35	196	129	160	126	0	323.31	44.4	47.8	47.7	44.6	189160000000	27758000000	77945000000	52343000000	31111000000	7868800000	8319900000	6803300000	4842100000
P05784;CON__P05784	P05784;CON__P05784	3;3	1;1	1;1	Keratin, type I cytoskeletal 18	Krt18	sp|P05784|K1C18_MOUSE Keratin, type I cytoskeletal 18 OS=Mus musculus OX=10090 GN=Krt18 PE=1 SV=5;	2	3	1	1	2	2	2	3	0	0	0	1	0	0	0	1	10.6	7.3	7.3	47.538	423	423;423	1	1				0.0042355	6.3732	3.3	3.3	3.3	10.6	1915300	0	0	0	1915300	0	0	0	0
P07744;CON__P07744	P07744;CON__P07744	6;6	1;1	0;0	Keratin, type II cytoskeletal 4	Krt4	sp|P07744|K2C4_MOUSE Keratin, type II cytoskeletal 4 OS=Mus musculus OX=10090 GN=Krt4 PE=1 SV=2;	2	6	1	0	5	6	4	4	0	1	0	0	0	0	0	0	7.2	2.3	0	56.283	525	525;525	1	1				0.0034291	6.4412	5	7.2	4.8	4.8	10807000	0	10807000	0	0	0	0	0	0
CON__P08779	CON__P08779	26	12	9				1	26	12	9	22	20	18	14	11	7	6	3	8	6	5	3	40.6	24.3	17.5	51.267	473	473	2.51	11	7	14	9	0	94.427	38.7	31.5	30.7	23.5	1408300000	635530000	201650000	498920000	72170000	605930000	125650000	197490000	49738000
CON__P12035	CON__P12035	10	1	1				1	10	1	1	8	10	8	6	0	1	0	0	0	1	0	0	9.5	1.6	1.6	64.503	629	629	1	1				1	-2	7.5	9.5	7.8	7.3	10984000	0	10984000	0	0	0	0	0	0
CON__P13645;CON__Q7Z3Y7;CON__Q148H6;CON__Q2M2I5;A1L317;Q497I4;CON__REFSEQ:XP_986630;CON__O76014;CON__Q7Z3Y9;CON__O76013;CON__O76015;CON__A2AB72;CON__Q14525;CON__Q92764;CON__Q9UE12;CON__A2A5Y0;CON__Q15323;Q61897;Q6IFX3;CON__Q497I4;B1AQ75;Q61765;Q62168;CON__Q14532	CON__P13645	43;5;4;3;1;1;1;1;1;1;1;1;1;1;1;1;1;1;1;1;1;1;1;1	43;5;4;3;1;1;1;1;1;1;1;1;1;1;1;1;1;1;1;1;1;1;1;1	27;1;0;0;0;0;0;0;0;0;0;0;0;0;0;0;0;0;0;0;0;0;0;0				24	43	43	27	30	39	35	31	30	39	35	31	17	23	20	20	52.4	52.4	43.3	59.51	593	593;486;464;525;512;455;476;471;468;467;456;453;404;425;416;416;416;404;439;455;473;416;407;448	2.28	149	103	108	83	0	323.31	44.4	48.6	48.2	45.4	125450000000	22224000000	61065000000	25420000000	16737000000	7130000000	9893700000	4745200000	3197900000
CON__P13647	CON__P13647	39	31	8				1	39	31	8	21	34	24	25	14	26	17	19	4	6	6	6	44.2	36.1	7.6	62.378	590	590	2.29	56	27	35	32	0	323.31	28.6	40.5	30.2	34.2	7402100000	848560000	3250400000	1841200000	1461900000	473780000	578140000	504670000	264490000
CON__P19012;CON__Q99456;Q64291	CON__P19012	12;3;1	3;1;1	0;0;0				3	12	3	0	8	12	9	9	0	3	1	1	0	0	0	0	14.9	4.2	0	49.167	456	456;494;487	2.2	2	1	1	1	0.0013289	19.064	10.7	14.9	12.9	12.7	87853000	0	69379000	9166100	9307500	0	0	0	0
CON__P19013	CON__P19013	6	3	2				1	6	3	2	2	6	3	2	0	3	1	0	0	2	1	0	10.8	6.1	4	63.91	594	594	1.25	3	1			0.0013316	19.094	2.7	10.8	4.7	2.7	34344000	0	27032000	7311800	0	0	0	0	0
CON__P20930	CON__P20930	3	3	3				1	3	3	3	0	3	0	0	0	3	0	0	0	3	0	0	0.6	0.6	0.6	435.16	4061	4061	1	3				0.00072569	23.213	0	0.6	0	0	128600000	0	128600000	0	0	0	0	0	0
CON__P35527	CON__P35527	41	40	40				1	41	40	40	22	33	26	32	21	32	25	31	21	32	25	31	62.3	62.3	62.3	62.129	623	623	2.37	118	72	83	83	0	323.31	41.1	54.3	57.5	54.6	74531000000	11504000000	27310000000	21648000000	14069000000	4677500000	3817600000	3997200000	1851600000
CON__P35908v2;CON__P35908;CON__Q01546;Q6IFZ9;Q9R0H5;CON__Q9R0H5	CON__P35908v2;CON__P35908	52;51;7;3;3;3	52;51;7;3;3;3	36;35;0;0;0;0			;	6	52	52	36	31	51	35	37	31	51	35	37	18	36	21	23	79.7	79.7	67.9	65.432	639	639;645;638;495;524;524	2.35	165	98	125	106	0	323.31	46.2	79.7	54	57.4	109090000000	19533000000	54638000000	20597000000	14322000000	8938000000	9074100000	5015500000	3712600000
CON__P48668	CON__P48668	37	1	0				1	37	1	0	20	28	26	26	1	1	1	1	0	0	0	0	47.5	1.8	0	60.024	564	564	2.62	2	1	3	2	0	66.664	31	38.5	36.3	43.3	324660000	83794000	51603000	33596000	155660000	0	0	0	0
CON__Q04695;P19001;CON__P19001	CON__Q04695	17;7;7	4;1;1	2;1;1				3	17	4	2	12	15	12	8	2	3	3	0	0	1	1	0	29.9	11.6	5.8	48.105	432	432;403;403	2.3	3	3	2	2	0.00080386	26.052	22.2	26.6	24.5	11.1	250620000	83797000	107100000	59723000	0	0	68847000	53618000	0
Q9Z2K1;CON__Q3ZAW8;CON__Q9Z2K1	Q9Z2K1;CON__Q3ZAW8;CON__Q9Z2K1	11;11;11	1;1;1	1;1;1	Keratin, type I cytoskeletal 16	Krt16	sp|Q9Z2K1|K1C16_MOUSE Keratin, type I cytoskeletal 16 OS=Mus musculus OX=10090 GN=Krt16 PE=1 SV=3;;	3	11	1	1	8	8	8	5	0	1	0	0	0	1	0	0	18.8	1.9	1.9	51.606	469	469;474;469	1	1				1	-2	14.9	12.6	12.4	8.1	9188400	0	9188400	0	0	0	0	0	0
CON__Q5D862	CON__Q5D862	7	7	7				1	7	7	7	1	6	1	0	1	6	1	0	1	6	1	0	7.6	7.6	7.6	248.07	2391	2391	1.91	7		2	2	0	108.22	0.5	7.2	0.5	0	578360000	14760000	550990000	12616000	0	0	0	0	0
CON__Q5XKE5	CON__Q5XKE5	11	1	1				1	11	1	1	7	11	9	6	0	1	0	0	0	1	0	0	16.3	3.7	3.7	57.809	535	535	3			1		1	-2	8.8	16.3	12.3	8.6	6133000	0	6133000	0	0	0	0	0	0
CON__Q5XQN5;Q922U2;CON__Q922U2;Q9DCV7;CON__Q9DCV7;CON__Q3KNV1;CON__P08729;CON__Q9NSB2;CON__Q6ISB0;CON__Q9H552;CON__REFSEQ:XP_932229	CON__Q5XQN5;Q922U2;CON__Q922U2	28;22;22;3;3;3;3;3;3;2;1	1;0;0;0;0;0;0;0;0;0;0	1;0;0;0;0;0;0;0;0;0;0	Keratin, type II cytoskeletal 5	Krt5	;sp|Q922U2|K2C5_MOUSE Keratin, type II cytoskeletal 5 OS=Mus musculus OX=10090 GN=Krt5 PE=1 SV=1;	11	28	1	1	15	26	16	16	0	1	0	0	0	1	0	0	33.1	1.7	1.7	62.936	601	601;580;580;457;457;469;469;600;600;499;345	1	1				0.0026144	6.6447	20	30.3	21	23.1	10384000	0	10384000	0	0	0	0	0	0
CON__Q6KB66-1;Q0VBK2;CON__Q0VBK2	CON__Q6KB66-1;Q0VBK2;CON__Q0VBK2	2;1;1	2;1;1	2;1;1	Keratin, type II cytoskeletal 80	Krt80	;sp|Q0VBK2|K2C80_MOUSE Keratin, type II cytoskeletal 80 OS=Mus musculus OX=10090 GN=Krt80 PE=1 SV=1;	3	2	2	2	0	2	0	0	0	2	0	0	0	2	0	0	4.2	4.2	4.2	50.525	452	452;452;452	1	2				0.0009995	11.794	0	4.2	0	0	6271200	0	6271200	0	0	0	0	0	0
CON__Q7RTS7	CON__Q7RTS7	4	2	1				1	4	2	1	3	4	3	4	1	2	1	2	0	1	0	1	5.7	4	1.7	57.865	529	529	1	6				0.0014164	21.577	4	5.7	4	5.7	228890000	20074000	89250000	22311000	97256000	0	0	0	0
CON__Q8N1N4-2;CON__Q7RTT2	CON__Q8N1N4-2;CON__Q7RTT2	8;8	8;8	8;8			;	2	8	8	8	0	8	2	2	0	8	2	2	0	8	2	2	17.7	17.7	17.7	56.964	521	521;521	1.21	12	1	1		0	51.187	0	17.7	4	4	314720000	0	282260000	17160000	15303000	0	85629000	9252800	7903600
CON__Q7Z3Y8;CON__Q7Z3Z0;Q9Z320;Q8VCW2	CON__Q7Z3Y8;CON__Q7Z3Z0;Q9Z320;Q8VCW2	4;3;2;2	2;1;1;1	1;0;0;0	Keratin, type I cytoskeletal 27;Keratin, type I cytoskeletal 25	Krt27;Krt25	;;sp|Q9Z320|K1C27_MOUSE Keratin, type I cytoskeletal 27 OS=Mus musculus OX=10090 GN=Krt27 PE=1 SV=1;sp|Q8VCW2|K1C25_MOUSE Keratin, type I cytoskeletal 25 OS=Mus musculus OX=10090 GN=Krt25 PE=1 SV=1	4	4	2	1	2	4	2	2	0	2	0	0	0	1	0	0	8.5	4.6	2	49.823	459	459;450;448;446	3			2		0.0010272	12.068	3.9	8.5	3.9	3.9	11108000	0	11108000	0	0	0	0	0	0
CON__Q7Z794	CON__Q7Z794	9	6	5				1	9	6	5	3	9	4	4	0	6	1	1	0	5	1	0	14.7	11.1	9	61.802	578	578	1.38	6	1	1		0	41.409	3.6	14.7	5.4	5.7	57076000	0	54408000	0	2667600	0	0	0	0
CON__Q86YZ3	CON__Q86YZ3	8	8	8				1	8	8	8	0	8	0	0	0	8	0	0	0	8	0	0	9.7	9.7	9.7	282.39	2850	2850	2.75	7		4	9	0	168.87	0	9.7	0	0	963820000	0	963820000	0	0	0	0	0	0
CON__Streptavidin	CON__Streptavidin	3	3	3				1	3	3	3	3	0	0	0	3	0	0	0	3	0	0	0	36.2	36.2	36.2	16.622	160	160	2	3	2	1	1	0	42.656	36.2	0	0	0	446050000	446050000	0	0	0	0	0	0	0
D3YVF0	D3YVF0	10	10	10	A-kinase anchor protein 5	Akap5	sp|D3YVF0|AKAP5_MOUSE A-kinase anchor protein 5 OS=Mus musculus OX=10090 GN=Akap5 PE=1 SV=2	1	10	10	10	0	10	4	4	0	10	4	4	0	10	4	4	29.3	29.3	29.3	79.396	745	745	1	18				0	86.954	0	29.3	8.5	6.3	836940000	0	582570000	98323000	156050000	0	133670000	155910000	152420000
D3YXJ0	D3YXJ0	4	4	4	Diacylglycerol kinase	Dgkh	sp|D3YXJ0|DGKH_MOUSE Diacylglycerol kinase eta OS=Mus musculus OX=10090 GN=Dgkh PE=1 SV=2	1	4	4	4	0	3	0	1	0	3	0	1	0	3	0	1	3.9	3.9	3.9	134.13	1211	1211	1	4				0.0007326	23.469	0	3	0	0.9	27247000	0	21794000	0	5453100	0	0	0	0
D3YZI9	D3YZI9	3	3	3		Pgbd5	sp|D3YZI9|PGBD5_MOUSE PiggyBac transposable element-derived protein 5 OS=Mus musculus OX=10090 GN=Pgbd5 PE=1 SV=1	1	3	3	3	0	0	3	1	0	0	3	1	0	0	3	1	6.1	6.1	6.1	58.3	523	523	2		4			0.0012063	17.425	0	0	6.1	1.7	25892000	0	0	22783000	3108300	0	0	0	0
D3YZP9	D3YZP9	1	1	1	Coiled-coil domain-containing protein 6	Ccdc6	sp|D3YZP9|CCDC6_MOUSE Coiled-coil domain-containing protein 6 OS=Mus musculus OX=10090 GN=Ccdc6 PE=1 SV=1	1	1	1	1	0	0	1	1	0	0	1	1	0	0	1	1	2.1	2.1	2.1	52.938	469	469	2		2			0.0021949	6.7147	0	0	2.1	2.1	12385000	0	0	5089800	7295700	0	0	0	0
D3YZU1	D3YZU1	16	15	15	SH3 and multiple ankyrin repeat domains protein 1	Shank1	sp|D3YZU1|SHAN1_MOUSE SH3 and multiple ankyrin repeat domains protein 1 OS=Mus musculus OX=10090 GN=Shank1 PE=1 SV=1	1	16	15	15	1	16	0	9	1	15	0	8	1	15	0	8	7.7	7.3	7.3	226.31	2167	2167	1.22	24	1	1	1	0	93.313	0.5	7.7	0	4.7	249370000	5119100	177410000	0	66841000	0	21008000	0	20178000
D3Z4S3	D3Z4S3	3	3	3	Putative peptidyl-tRNA hydrolase PTRHD1	Ptrhd1	sp|D3Z4S3|PTRD1_MOUSE Putative peptidyl-tRNA hydrolase PTRHD1 OS=Mus musculus OX=10090 GN=Ptrhd1 PE=1 SV=1	1	3	3	3	0	3	0	0	0	3	0	0	0	3	0	0	19.3	19.3	19.3	16.037	140	140	4				3	0.0012308	17.736	0	19.3	0	0	17590000	0	17590000	0	0	0	0	0	0
D3Z7P3	D3Z7P3	12	12	12	Glutaminase kidney isoform, mitochondrial	Gls	sp|D3Z7P3|GLSK_MOUSE Glutaminase kidney isoform, mitochondrial OS=Mus musculus OX=10090 GN=Gls PE=1 SV=1	1	12	12	12	4	3	7	12	4	3	7	12	4	3	7	12	25.1	25.1	25.1	73.963	674	674	2.09	2	27	3	1	0	123.19	6.2	4.7	14.2	25.1	2232900000	201800000	82616000	813870000	1134600000	369760000	335050000	382100000	394300000
E9PUL5	E9PUL5	5	5	5	Proline-rich transmembrane protein 2	Prrt2	sp|E9PUL5|PRRT2_MOUSE Proline-rich transmembrane protein 2 OS=Mus musculus OX=10090 GN=Prrt2 PE=1 SV=1	1	5	5	5	0	3	3	4	0	3	3	4	0	3	3	4	26	26	26	35.923	346	346	1.75	7	7	1	1	0	138.21	0	15	9	24	1011500000	0	274910000	402500000	334050000	0	142260000	248250000	140190000
E9PUQ8	E9PUQ8	2	2	2	Diacylglycerol kinase	Dgkd	sp|E9PUQ8|DGKD_MOUSE Diacylglycerol kinase delta OS=Mus musculus OX=10090 GN=Dgkd PE=1 SV=1	1	2	2	2	0	2	0	0	0	2	0	0	0	2	0	0	2	2	2	135.21	1220	1220	1	2				0.0014395	11.493	0	2	0	0	11885000	0	11885000	0	0	0	0	0	0
E9PV24	E9PV24	3	3	3	Fibrinogen alpha chain;Fibrinopeptide A;Fibrinogen alpha chain	Fga	sp|E9PV24|FIBA_MOUSE Fibrinogen alpha chain OS=Mus musculus OX=10090 GN=Fga PE=1 SV=1	1	3	3	3	3	0	0	0	3	0	0	0	3	0	0	0	4.2	4.2	4.2	87.428	789	789	3			3		0.0012077	17.43	4.2	0	0	0	35222000	35222000	0	0	0	0	0	0	0
E9PVA8	E9PVA8	2	2	2		Gcn1l1	sp|E9PVA8|GCN1_MOUSE eIF-2-alpha kinase activator GCN1 OS=Mus musculus OX=10090 GN=Gcn1 PE=1 SV=1	1	2	2	2	0	1	1	0	0	1	1	0	0	1	1	0	0.8	0.8	0.8	293.02	2671	2671	2.5		1	1		0.0014045	11.29	0	0.5	0.3	0	24210000	0	3002800	21207000	0	0	0	0	0
E9PYK3	E9PYK3	1	1	1		Parp4	sp|E9PYK3|PARP4_MOUSE Protein mono-ADP-ribosyltransferase PARP4 OS=Mus musculus OX=10090 GN=Parp4 PE=1 SV=1	1	1	1	1	0	1	1	0	0	1	1	0	0	1	1	0	0.4	0.4	0.4	216.13	1969	1969	4				2	0.0021988	6.7319	0	0.4	0.4	0	2071600	0	1597800	473820	0	0	0	0	0
E9Q349	E9Q349	1	1	1	WD repeat-containing protein 25	Wdr25	sp|E9Q349|WDR25_MOUSE WD repeat-containing protein 25 OS=Mus musculus OX=10090 GN=Wdr25 PE=2 SV=1	1	1	1	1	1	0	0	0	1	0	0	0	1	0	0	0	1.7	1.7	1.7	58.479	535	535	4				1	0.0058725	6.3377	1.7	0	0	0	4084500	4084500	0	0	0	0	0	0	0
E9Q3L2	E9Q3L2	16	16	16		Pi4ka	sp|E9Q3L2|PI4KA_MOUSE Phosphatidylinositol 4-kinase alpha OS=Mus musculus OX=10090 GN=Pi4ka PE=1 SV=2	1	16	16	16	0	14	3	8	0	14	3	8	0	14	3	8	8.6	8.6	8.6	237.04	2105	2105	1.04	26	1			0	109.6	0	7.6	1.6	4.8	407840000	0	243620000	25026000	139190000	0	53174000	20788000	35441000
E9Q401;A2AGL3	E9Q401	18;2	18;2	16;1	Ryanodine receptor 2	Ryr2	sp|E9Q401|RYR2_MOUSE Ryanodine receptor 2 OS=Mus musculus OX=10090 GN=Ryr2 PE=1 SV=1	2	18	18	16	2	14	5	11	2	14	5	11	2	13	5	9	4	4	3.7	564.81	4966	4966;4863	1	32				0	114.29	0.4	3.2	1	2.4	326700000	11577000	183540000	31546000	100030000	26755000	30455000	21884000	34586000
E9Q557	E9Q557	22	22	22	Desmoplakin	Dsp	sp|E9Q557|DESP_MOUSE Desmoplakin OS=Mus musculus OX=10090 GN=Dsp PE=1 SV=1	1	22	22	22	1	21	0	3	1	21	0	3	1	21	0	3	8	8	8	332.91	2883	2883	1.39	23	2		3	0	138.73	0.3	7.6	0	1	489850000	11687000	455270000	0	22890000	0	67923000	0	5265200
E9Q612	E9Q612	2	2	2	Receptor-type tyrosine-protein phosphatase O	Ptpro	sp|E9Q612|PTPRO_MOUSE Receptor-type tyrosine-protein phosphatase O OS=Mus musculus OX=10090 GN=Ptpro PE=1 SV=1	1	2	2	2	1	0	0	1	1	0	0	1	1	0	0	1	1.8	1.8	1.8	138.59	1226	1226	2	1		1		0.0013844	10.975	1.1	0	0	0.7	6977500	3020600	0	0	3956900	0	0	0	0
E9Q6B2	E9Q6B2	1	1	1	Coiled-coil domain-containing protein 85C	Ccdc85c	sp|E9Q6B2|CC85C_MOUSE Coiled-coil domain-containing protein 85C OS=Mus musculus OX=10090 GN=Ccdc85c PE=1 SV=1	1	1	1	1	0	0	1	1	0	0	1	1	0	0	1	1	6.4	6.4	6.4	45.333	420	420	2.33		2	1		0.0013787	9.5601	0	0	6.4	6.4	48901000	0	0	42668000	6233300	0	0	0	0
E9Q6P5	E9Q6P5	8	8	8		Ttc7b	sp|E9Q6P5|TTC7B_MOUSE Tetratricopeptide repeat protein 7B OS=Mus musculus OX=10090 GN=Ttc7b PE=1 SV=1	1	8	8	8	0	7	1	2	0	7	1	2	0	7	1	2	11.2	11.2	11.2	94.202	843	843	1.18	10		1		0	47.912	0	10	1.2	2.1	114190000	0	76795000	12236000	25155000	0	0	0	0
E9Q7X7	E9Q7X7	3	3	3		Nrxn2	sp|E9Q7X7|NRX2A_MOUSE Neurexin-2 OS=Mus musculus OX=10090 GN=Nrxn2 PE=1 SV=1	1	3	3	3	0	2	0	2	0	2	0	2	0	2	0	2	1.9	1.9	1.9	184.88	1710	1710	1	4				0.0012829	18.352	0	1.3	0	1.3	37993000	0	26071000	0	11923000	0	0	0	0
E9Q8I9	E9Q8I9	1	1	1	Protein furry homolog	Fry	sp|E9Q8I9|FRY_MOUSE Protein furry homolog OS=Mus musculus OX=10090 GN=Fry PE=1 SV=1	1	1	1	1	0	1	0	0	0	1	0	0	0	1	0	0	0.3	0.3	0.3	339.09	3020	3020	1	1				0.0034173	6.4241	0	0.3	0	0	7364900	0	7364900	0	0	0	0	0	0
E9Q912	E9Q912	18	18	18		Rap1gds1	sp|E9Q912|GDS1_MOUSE Rap1 GTPase-GDP dissociation stimulator 1 OS=Mus musculus OX=10090 GN=Rap1gds1 PE=2 SV=1	1	18	18	18	5	7	16	14	5	7	16	14	5	7	16	14	37.9	37.9	37.9	66.076	607	607	2.24	5	40	16	2	0	207.5	9.9	13	31	28.5	2614700000	139040000	117340000	1210100000	1148200000	125600000	118410000	225220000	244560000
F6SEU4;Q3UHC7	F6SEU4	25;1	25;1	25;1	Ras/Rap GTPase-activating protein SynGAP	Syngap1	sp|F6SEU4|SYGP1_MOUSE Ras/Rap GTPase-activating protein SynGAP OS=Mus musculus OX=10090 GN=Syngap1 PE=1 SV=2	2	25	25	25	7	22	11	17	7	22	11	17	7	22	11	17	23.7	23.7	23.7	148.24	1340	1340;1189	1.35	56	13	5	1	0	306.75	5.7	22.5	9.9	15.5	2856500000	123890000	1410000000	370190000	952370000	129060000	197160000	143950000	193750000
F6W8I0	F6W8I0	1	1	1	YjeF N-terminal domain-containing protein 3	Yjefn3	sp|F6W8I0|YJEN3_MOUSE YjeF N-terminal domain-containing protein 3 OS=Mus musculus OX=10090 GN=Yjefn3 PE=1 SV=2	1	1	1	1	0	1	0	0	0	1	0	0	0	1	0	0	7.6	7.6	7.6	27.016	251	251	3			1		0.0021978	6.7287	0	7.6	0	0	12082000	0	12082000	0	0	0	0	0	0
F8VPU2	F8VPU2	7	7	7	FERM, RhoGEF and pleckstrin domain-containing protein 1	Farp1	sp|F8VPU2|FARP1_MOUSE FERM, ARHGEF and pleckstrin domain-containing protein 1 OS=Mus musculus OX=10090 GN=Farp1 PE=1 SV=1	1	7	7	7	0	6	0	2	0	6	0	2	0	6	0	2	7.9	7.9	7.9	118.87	1048	1048	1	8				0	42.38	0	6.8	0	2.4	156820000	0	116800000	0	40019000	0	0	0	0
G3X9K3;A2A5R2	G3X9K3;A2A5R2	4;3	4;3	4;3	Brefeldin A-inhibited guanine nucleotide-exchange protein 1;Brefeldin A-inhibited guanine nucleotide-exchange protein 2	Arfgef1;Arfgef2	sp|G3X9K3|BIG1_MOUSE Brefeldin A-inhibited guanine nucleotide-exchange protein 1 OS=Mus musculus OX=10090 GN=Arfgef1 PE=1 SV=1;sp|A2A5R2|BIG2_MOUSE Brefeldin A-inhibited guanine nucleotide-exchange protein 2 OS=Mus musculus OX=10090 GN=Arfgef2 PE=1 SV=1	2	4	4	4	0	3	1	2	0	3	1	2	0	3	1	2	2.1	2.1	2.1	208.5	1846	1846;1792	1	6				0.00072202	23.032	0	1.5	0.5	1.1	50457000	0	36400000	3939300	10118000	0	0	0	0
G5E829	G5E829	30	30	14	Plasma membrane calcium-transporting ATPase 1	Atp2b1	sp|G5E829|AT2B1_MOUSE Plasma membrane calcium-transporting ATPase 1 OS=Mus musculus OX=10090 GN=Atp2b1 PE=1 SV=1	1	30	30	14	16	28	17	24	16	28	17	24	6	13	8	12	26.3	26.3	14.3	134.75	1220	1220	1.22	107	11	7	1	0	323.31	15.7	26.2	17.2	23.3	11783000000	725990000	5955800000	1535400000	3566200000	679180000	606120000	508280000	636410000
G5E8K5	G5E8K5	22	13	13	Ankyrin-3	Ank3	sp|G5E8K5|ANK3_MOUSE Ankyrin-3 OS=Mus musculus OX=10090 GN=Ank3 PE=1 SV=1	1	22	13	13	2	22	4	10	1	13	1	4	1	13	1	4	11.5	7.8	7.8	214.06	1961	1961	1.15	18	1	1		0	85.922	1.2	11.5	2.3	5.9	336890000	5677500	248540000	6189400	76477000	0	40229000	0	28370000
G5E8V9	G5E8V9	1	1	1		Arfip1	sp|G5E8V9|ARFP1_MOUSE Arfaptin-1 OS=Mus musculus OX=10090 GN=Arfip1 PE=1 SV=1	1	1	1	1	0	0	1	1	0	0	1	1	0	0	1	1	2.9	2.9	2.9	41.518	373	373	2		2			0.0082953	6.2612	0	0	2.9	2.9	9228800	0	0	4372900	4855800	0	0	0	0
O08529	O08529	3	3	3	Calpain-2 catalytic subunit	Capn2	sp|O08529|CAN2_MOUSE Calpain-2 catalytic subunit OS=Mus musculus OX=10090 GN=Capn2 PE=1 SV=4	1	3	3	3	0	1	1	2	0	1	1	2	0	1	1	2	3.7	3.7	3.7	79.871	700	700	1.75	1	3			0.0012353	17.78	0	1.1	1.1	2.6	43791000	0	4850000	9198700	29742000	0	0	0	0
O08532;Q6PHS9	O08532	15;1	15;1	15;1	Voltage-dependent calcium channel subunit alpha-2/delta-1;Voltage-dependent calcium channel subunit alpha-2-1;Voltage-dependent calcium channel subunit delta-1	Cacna2d1	sp|O08532|CA2D1_MOUSE Voltage-dependent calcium channel subunit alpha-2/delta-1 OS=Mus musculus OX=10090 GN=Cacna2d1 PE=1 SV=1	2	15	15	15	2	13	3	7	2	13	3	7	2	13	3	7	15	15	15	124.63	1103	1103;1154	1.12	24			1	0	118.36	2.1	12.8	3.2	7.3	723240000	15590000	477070000	56284000	174300000	0	79601000	65481000	75229000
O08539;D3Z6Q9	O08539	16;2	14;0	14;0	Myc box-dependent-interacting protein 1	Bin1	sp|O08539|BIN1_MOUSE Myc box-dependent-interacting protein 1 OS=Mus musculus OX=10090 GN=Bin1 PE=1 SV=1	2	16	14	14	3	11	10	15	1	9	8	13	1	9	8	13	34.4	32.8	32.8	64.469	588	588;489	1.61	19	23	2		0	130.68	3.7	20.2	20.6	32.7	2510100000	9368400	516290000	799050000	1185400000	0	215640000	187870000	196810000
O08547	O08547	7	7	7	Vesicle-trafficking protein SEC22b	Sec22b	sp|O08547|SC22B_MOUSE Vesicle-trafficking protein SEC22b OS=Mus musculus OX=10090 GN=Sec22b PE=1 SV=3	1	7	7	7	3	7	4	2	3	7	4	2	3	7	4	2	29.8	29.8	29.8	24.74	215	215	3.05			21	1	0	58.872	14	29.8	21.4	8.4	437060000	60877000	213190000	148970000	14021000	102980000	165510000	111000000	48267000
O08553	O08553	31	31	26	Dihydropyrimidinase-related protein 2	Dpysl2	sp|O08553|DPYL2_MOUSE Dihydropyrimidinase-related protein 2 OS=Mus musculus OX=10090 GN=Dpysl2 PE=1 SV=2	1	31	31	26	18	24	29	30	18	24	29	30	16	20	25	26	71	71	59.8	62.277	572	572	2.25	55	144	77	27	0	323.31	45.1	58.6	66.6	69.6	87932000000	12538000000	10202000000	29559000000	35633000000	6229400000	5598600000	5125100000	5837200000
O08576	O08576	2	2	2	RUN domain-containing protein 3A	Rundc3a	sp|O08576|RUN3A_MOUSE RUN domain-containing protein 3A OS=Mus musculus OX=10090 GN=Rundc3a PE=1 SV=1	1	2	2	2	0	0	1	2	0	0	1	2	0	0	1	2	4.5	4.5	4.5	50.018	446	446	2		3			0.0010357	12.171	0	0	1.8	4.5	22174000	0	0	6687500	15486000	0	0	0	0
O08579	O08579	2	2	2	Emerin	Emd	sp|O08579|EMD_MOUSE Emerin OS=Mus musculus OX=10090 GN=Emd PE=1 SV=1	1	2	2	2	0	1	1	0	0	1	1	0	0	1	1	0	11.2	11.2	11.2	29.435	259	259	3			2		0.0011357	14.095	0	6.6	4.6	0	30206000	0	7246700	22959000	0	0	0	0	0
O08583;Q9JJW6	O08583	3;1	3;1	3;1	THO complex subunit 4	Alyref	sp|O08583|THOC4_MOUSE THO complex subunit 4 OS=Mus musculus OX=10090 GN=Alyref PE=1 SV=3	2	3	3	3	1	3	1	1	1	3	1	1	1	3	1	1	21.6	21.6	21.6	26.94	255	255;218	3			6		0.0013615	19.653	4.3	21.6	4.3	4.3	174330000	33296000	97496000	23836000	19700000	0	0	0	0
O08585	O08585	5	5	5	Clathrin light chain A	Clta	sp|O08585|CLCA_MOUSE Clathrin light chain A OS=Mus musculus OX=10090 GN=Clta PE=1 SV=2	1	5	5	5	3	4	3	4	3	4	3	4	3	4	3	4	14.9	14.9	14.9	25.604	235	235	2.68		9	11	2	0	31.463	10.6	14.9	10.6	14.5	729280000	105150000	127760000	313450000	182920000	136410000	87647000	171280000	123680000
O08586	O08586	2	2	2	Phosphatidylinositol 3,4,5-trisphosphate 3-phosphatase and dual-specificity protein phosphatase PTEN	Pten	sp|O08586|PTEN_MOUSE Phosphatidylinositol 3,4,5-trisphosphate 3-phosphatase and dual-specificity protein phosphatase PTEN OS=Mus musculus OX=10090 GN=Pten PE=1 SV=1	1	2	2	2	0	0	1	2	0	0	1	2	0	0	1	2	6.5	6.5	6.5	47.152	403	403	2		3			0.0010235	12.046	0	0	3	6.5	31920000	0	0	11170000	20750000	0	0	0	0
O08599	O08599	35	35	35	Syntaxin-binding protein 1	Stxbp1	sp|O08599|STXB1_MOUSE Syntaxin-binding protein 1 OS=Mus musculus OX=10090 GN=Stxbp1 PE=1 SV=2	1	35	35	35	23	26	30	34	23	26	30	34	23	26	30	34	64	64	64	67.568	594	594	2.45	27	132	88	32	0	323.31	43.8	42.8	50	64	49274000000	8340700000	4496100000	18302000000	18135000000	1914000000	1365900000	1984400000	1764600000
O08663	O08663	2	2	2	Methionine aminopeptidase 2	Metap2	sp|O08663|MAP2_MOUSE Methionine aminopeptidase 2 OS=Mus musculus OX=10090 GN=Metap2 PE=1 SV=1	1	2	2	2	0	0	0	2	0	0	0	2	0	0	0	2	4	4	4	52.921	478	478	2		2			0.0010246	12.056	0	0	0	4	11583000	0	0	0	11583000	0	0	0	0
O08688	O08688	3	3	3	Calpain-5	Capn5	sp|O08688|CAN5_MOUSE Calpain-5 OS=Mus musculus OX=10090 GN=Capn5 PE=1 SV=1	1	3	3	3	1	0	0	3	1	0	0	3	1	0	0	3	6.4	6.4	6.4	72.954	640	640	2.25		3	1		0.0011962	17.286	3	0	0	6.4	38414000	6685400	0	0	31728000	0	0	0	0
O08709	O08709	14	14	14	Peroxiredoxin-6	Prdx6	sp|O08709|PRDX6_MOUSE Peroxiredoxin-6 OS=Mus musculus OX=10090 GN=Prdx6 PE=1 SV=3	1	14	14	14	11	11	11	8	11	11	11	8	11	11	11	8	75.9	75.9	75.9	24.87	224	224	3.16			51	10	0	233.14	62.1	57.6	66.5	37.9	6859600000	1691100000	2715500000	1579500000	873580000	935440000	1117500000	768250000	942610000
O08749	O08749	14	14	14	Dihydrolipoyl dehydrogenase, mitochondrial	Dld	sp|O08749|DLDH_MOUSE Dihydrolipoyl dehydrogenase, mitochondrial OS=Mus musculus OX=10090 GN=Dld PE=1 SV=2	1	14	14	14	9	8	12	12	9	8	12	12	9	8	12	12	33.4	33.4	33.4	54.272	509	509	2.39	10	36	19	10	0	323.31	19.6	17.3	26.1	30.6	4431900000	650230000	381250000	1592500000	1807900000	575380000	429160000	524430000	509190000
O08756	O08756	5	5	5	3-hydroxyacyl-CoA dehydrogenase type-2	Hsd17b10	sp|O08756|HCD2_MOUSE 3-hydroxyacyl-CoA dehydrogenase type-2 OS=Mus musculus OX=10090 GN=Hsd17b10 PE=1 SV=4	1	5	5	5	3	4	4	5	3	4	4	5	3	4	4	5	23.4	23.4	23.4	27.418	261	261	3.05			19	1	0	72.579	15.7	18.8	18.8	23.4	590540000	135530000	189860000	147630000	117520000	204450000	220680000	134630000	177250000
O08759	O08759	2	2	2	Ubiquitin-protein ligase E3A	Ube3a	sp|O08759|UBE3A_MOUSE Ubiquitin-protein ligase E3A OS=Mus musculus OX=10090 GN=Ube3a PE=1 SV=2	1	2	2	2	0	2	0	0	0	2	0	0	0	2	0	0	3.7	3.7	3.7	99.818	870	870	1	2				0.00096852	11.559	0	3.7	0	0	23619000	0	23619000	0	0	0	0	0	0
O08788	O08788	27	27	27	Dynactin subunit 1	Dctn1	sp|O08788|DCTN1_MOUSE Dynactin subunit 1 OS=Mus musculus OX=10090 GN=Dctn1 PE=1 SV=3	1	27	27	27	0	23	6	12	0	23	6	12	0	23	6	12	24	24	24	141.67	1281	1281	1.09	40	4			0	199.91	0	21.7	5.5	10.6	869140000	0	527220000	104350000	237580000	0	68423000	52923000	60725000
O08795	O08795	4	4	4	Glucosidase 2 subunit beta	Prkcsh	sp|O08795|GLU2B_MOUSE Glucosidase 2 subunit beta OS=Mus musculus OX=10090 GN=Prkcsh PE=1 SV=1	1	4	4	4	0	3	0	1	0	3	0	1	0	3	0	1	8.4	8.4	8.4	58.792	521	521	1	4				0.00075075	24.18	0	6.3	0	2.1	67159000	0	57498000	0	9661000	0	0	0	0
O08807	O08807	3	2	2	Peroxiredoxin-4	Prdx4	sp|O08807|PRDX4_MOUSE Peroxiredoxin-4 OS=Mus musculus OX=10090 GN=Prdx4 PE=1 SV=1	1	3	2	2	2	2	3	2	1	1	2	1	1	1	2	1	11.3	8.4	8.4	31.052	274	274	3.17		1	8	3	0.0011501	15.005	6.9	6.9	11.3	6.9	651350000	168540000	289300000	125660000	67851000	0	0	0	0
O08810	O08810	2	1	1	116 kDa U5 small nuclear ribonucleoprotein component	Eftud2	sp|O08810|U5S1_MOUSE 116 kDa U5 small nuclear ribonucleoprotein component OS=Mus musculus OX=10090 GN=Eftud2 PE=1 SV=1	1	2	1	1	1	2	1	1	0	1	0	0	0	1	0	0	2	0.9	0.9	109.36	971	971	1	1				0.0054691	6.3443	1	2	1	1	6407100	0	6407100	0	0	0	0	0	0
O08848	O08848	1	1	1	60 kDa SS-A/Ro ribonucleoprotein	Trove2	sp|O08848|RO60_MOUSE 60 kDa SS-A/Ro ribonucleoprotein OS=Mus musculus OX=10090 GN=RO60 PE=1 SV=1	1	1	1	1	0	0	1	1	0	0	1	1	0	0	1	1	2	2	2	60.123	538	538	2		2			0.0013587	7.6173	0	0	2	2	22315000	0	0	10403000	11911000	0	0	0	0
O08915	O08915	3	3	3	AH receptor-interacting protein	Aip	sp|O08915|AIP_MOUSE AH receptor-interacting protein OS=Mus musculus OX=10090 GN=Aip PE=1 SV=1	1	3	3	3	0	2	3	1	0	2	3	1	0	2	3	1	12.7	12.7	12.7	37.605	330	330	3			6		0.0012005	17.314	0	8.8	12.7	4.5	94191000	0	25492000	64334000	4365000	0	43023000	100170000	0
O08917	O08917	14	14	14	Flotillin-1	Flot1	sp|O08917|FLOT1_MOUSE Flotillin-1 OS=Mus musculus OX=10090 GN=Flot1 PE=1 SV=1	1	14	14	14	2	3	12	12	2	3	12	12	2	3	12	12	37.1	37.1	37.1	47.513	428	428	2.09		31	3		0	120.22	5.8	7.7	32.5	30.8	926800000	22012000	22086000	554680000	328020000	36450000	36835000	173370000	112150000
O08919	O08919	4	4	4	Numb-like protein	Numbl	sp|O08919|NUMBL_MOUSE Numb-like protein OS=Mus musculus OX=10090 GN=Numbl PE=1 SV=3	1	4	4	4	0	4	2	2	0	4	2	2	0	4	2	2	7	7	7	64.13	604	604	1.5	4	4			0.00077942	25.035	0	7	3.6	3.6	120230000	0	49375000	36103000	34753000	0	22339000	28495000	27404000
O08989	O08989	3	3	3	Ras-related protein M-Ras	Mras	sp|O08989|RASM_MOUSE Ras-related protein M-Ras OS=Mus musculus OX=10090 GN=Mras PE=1 SV=1	1	3	3	3	2	2	2	1	2	2	2	1	2	2	2	1	16.8	16.8	16.8	23.901	208	208	3.25			6	2	0	31.552	12	10.1	10.1	5.3	168540000	28480000	76657000	49062000	14336000	0	0	0	0
O09061	O09061	5	5	5	Proteasome subunit beta type-1	Psmb1	sp|O09061|PSB1_MOUSE Proteasome subunit beta type-1 OS=Mus musculus OX=10090 GN=Psmb1 PE=1 SV=1	1	5	5	5	3	4	3	2	3	4	3	2	3	4	3	2	23.3	23.3	23.3	26.372	240	240	3.2			12	3	0	32.125	13.3	17.5	11.7	7.5	517260000	117010000	259690000	98640000	41923000	118550000	210370000	125110000	143690000
O09111	O09111	1	1	1	NADH dehydrogenase [ubiquinone] 1 beta subcomplex subunit 11, mitochondrial	Ndufb11	sp|O09111|NDUBB_MOUSE NADH dehydrogenase [ubiquinone] 1 beta subcomplex subunit 11, mitochondrial OS=Mus musculus OX=10090 GN=Ndufb11 PE=1 SV=2	1	1	1	1	1	1	1	1	1	1	1	1	1	1	1	1	6.6	6.6	6.6	17.444	151	151	3	2			4	0.0013831	10.82	6.6	6.6	6.6	6.6	346840000	26200000	198640000	86566000	35442000	0	0	0	0
O09114	O09114	1	1	1	Prostaglandin-H2 D-isomerase	Ptgds	sp|O09114|PTGDS_MOUSE Prostaglandin-H2 D-isomerase OS=Mus musculus OX=10090 GN=Ptgds PE=1 SV=1	1	1	1	1	1	1	1	1	1	1	1	1	1	1	1	1	9	9	9	21.066	189	189	3			4		0.0017644	6.795	9	9	9	9	113620000	19666000	38432000	31216000	24307000	0	0	0	0
O09131;Q8K2Q2	O09131	3;1	3;1	3;1	Glutathione S-transferase omega-1	Gsto1	sp|O09131|GSTO1_MOUSE Glutathione S-transferase omega-1 OS=Mus musculus OX=10090 GN=Gsto1 PE=1 SV=2	2	3	3	3	1	3	2	0	1	3	2	0	1	3	2	0	11.2	11.2	11.2	27.497	240	240;248	3			6		0.001345	19.366	4.2	11.2	7.9	0	96411000	12599000	49020000	34793000	0	0	61016000	56923000	0
O09167	O09167	2	2	2	60S ribosomal protein L21	Rpl21	sp|O09167|RL21_MOUSE 60S ribosomal protein L21 OS=Mus musculus OX=10090 GN=Rpl21 PE=1 SV=3	1	2	2	2	1	2	1	2	1	2	1	2	1	2	1	2	16.2	16.2	16.2	18.562	160	160	3.25			6	2	0.0011744	16.961	6.9	16.2	9.4	16.2	253260000	22793000	159420000	24486000	46563000	0	374120000	0	145880000
O09172	O09172	2	2	2	Glutamate--cysteine ligase regulatory subunit	Gclm	sp|O09172|GSH0_MOUSE Glutamate--cysteine ligase regulatory subunit OS=Mus musculus OX=10090 GN=Gclm PE=1 SV=1	1	2	2	2	0	2	0	0	0	2	0	0	0	2	0	0	8.8	8.8	8.8	30.534	274	274	3.5			1	1	0.0014052	11.293	0	8.8	0	0	23531000	0	23531000	0	0	0	0	0	0
O35066;Q99PW8;O35231;Q61771	O35066;Q99PW8;O35231;Q61771	1;1;1;1	1;1;1;1	1;1;1;1	Kinesin-like protein KIF3C;Kinesin-like protein KIF17;Kinesin-like protein KIFC3;Kinesin-like protein KIF3B;Kinesin-like protein KIF3B, N-terminally processed	Kif3c;Kif17;Kifc3;Kif3b	sp|O35066|KIF3C_MOUSE Kinesin-like protein KIF3C OS=Mus musculus OX=10090 GN=Kif3c PE=1 SV=3;sp|Q99PW8|KIF17_MOUSE Kinesin-like protein KIF17 OS=Mus musculus OX=10090 GN=Kif17 PE=1 SV=1;sp|O35231|KIFC3_MOUSE Kinesin-like protein KIFC3 OS=Mus musculus OX=10	4	1	1	1	0	1	1	1	0	1	1	1	0	1	1	1	1.4	1.4	1.4	89.972	796	796;1038;824;747	1	3				0.0030185	6.4856	0	1.4	1.4	1.4	35465000	0	17994000	6834300	10637000	0	0	0	0
O35098	O35098	12	11	11	Dihydropyrimidinase-related protein 4	Dpysl4	sp|O35098|DPYL4_MOUSE Dihydropyrimidinase-related protein 4 OS=Mus musculus OX=10090 GN=Dpysl4 PE=1 SV=1	1	12	11	11	4	2	10	8	3	1	10	7	3	1	10	7	35.1	32.3	32.3	61.961	572	572	2.19		21	5		0	79.618	10.1	5.6	28.3	22	835690000	90377000	8299200	410220000	326800000	131250000	0	105160000	92299000
O35114	O35114	1	1	1	Lysosome membrane protein 2	Scarb2	sp|O35114|SCRB2_MOUSE Lysosome membrane protein 2 OS=Mus musculus OX=10090 GN=Scarb2 PE=1 SV=3	1	1	1	1	0	1	1	1	0	1	1	1	0	1	1	1	2.5	2.5	2.5	54.043	478	478	1.67	1	2			0.0017637	6.7935	0	2.5	2.5	2.5	16416000	0	7431800	4740200	4243900	0	0	0	0
O35129	O35129	13	13	13	Prohibitin-2	Phb2	sp|O35129|PHB2_MOUSE Prohibitin-2 OS=Mus musculus OX=10090 GN=Phb2 PE=1 SV=1	1	13	13	13	8	13	11	10	8	13	11	10	8	13	11	10	52.5	52.5	52.5	33.296	299	299	2.84	5	2	54	2	0	184.73	29.8	52.5	41.8	37.8	5173800000	893870000	1953700000	1712100000	614190000	583770000	1156400000	997560000	1046500000
O35136	O35136	11	11	11	Neural cell adhesion molecule 2	Ncam2	sp|O35136|NCAM2_MOUSE Neural cell adhesion molecule 2 OS=Mus musculus OX=10090 GN=Ncam2 PE=1 SV=1	1	11	11	11	0	10	5	7	0	10	5	7	0	10	5	7	15.7	15.7	15.7	93.203	837	837	1	22				0	75.663	0	13.9	8.1	10.2	619120000	0	335070000	90556000	193500000	0	75664000	94204000	74511000
O35143	O35143	2	2	2	ATPase inhibitor, mitochondrial	Atpif1	sp|O35143|ATIF1_MOUSE ATPase inhibitor, mitochondrial OS=Mus musculus OX=10090 GN=Atp5if1 PE=1 SV=2	1	2	2	2	1	2	1	0	1	2	1	0	1	2	1	0	8.5	8.5	8.5	12.159	106	106	4				4	0.0010086	11.894	6.6	8.5	8.5	0	160850000	18482000	41055000	101320000	0	0	0	0	0
O35166	O35166	1	1	1	Golgi SNAP receptor complex member 2	Gosr2	sp|O35166|GOSR2_MOUSE Golgi SNAP receptor complex member 2 OS=Mus musculus OX=10090 GN=Gosr2 PE=1 SV=2	1	1	1	1	1	1	0	0	1	1	0	0	1	1	0	0	5.2	5.2	5.2	24.725	212	212	3			2		0.0030251	6.4945	5.2	5.2	0	0	18198000	6173300	12025000	0	0	0	0	0	0
O35215	O35215	4	4	4	D-dopachrome decarboxylase	Ddt	sp|O35215|DOPD_MOUSE D-dopachrome decarboxylase OS=Mus musculus OX=10090 GN=Ddt PE=1 SV=3	1	4	4	4	3	4	2	2	3	4	2	2	3	4	2	2	37.3	37.3	37.3	13.077	118	118	4				14	0	44.201	30.5	37.3	16.9	17.8	672150000	195950000	348960000	76881000	50365000	283460000	206840000	306990000	253990000
O35239	O35239	4	4	4	Tyrosine-protein phosphatase non-receptor type 9	Ptpn9	sp|O35239|PTN9_MOUSE Tyrosine-protein phosphatase non-receptor type 9 OS=Mus musculus OX=10090 GN=Ptpn9 PE=1 SV=2	1	4	4	4	0	0	3	3	0	0	3	3	0	0	3	3	7.3	7.3	7.3	67.969	593	593	2		6			0.0007657	24.661	0	0	5.9	5.1	46884000	0	0	22212000	24671000	0	0	11463000	12944000
O35250	O35250	5	5	5	Exocyst complex component 7	Exoc7	sp|O35250|EXOC7_MOUSE Exocyst complex component 7 OS=Mus musculus OX=10090 GN=Exoc7 PE=1 SV=2	1	5	5	5	0	2	1	3	0	2	1	3	0	2	1	3	6.9	6.9	6.9	79.959	697	697	1.67	2	4			0	29.483	0	3.4	1.7	3.4	41123000	0	20001000	4715100	16407000	0	0	0	0
O35286	O35286	3	3	3	Pre-mRNA-splicing factor ATP-dependent RNA helicase DHX15	Dhx15	sp|O35286|DHX15_MOUSE Pre-mRNA-splicing factor ATP-dependent RNA helicase DHX15 OS=Mus musculus OX=10090 GN=Dhx15 PE=1 SV=2	1	3	3	3	0	3	0	1	0	3	0	1	0	3	0	1	4.7	4.7	4.7	91.006	795	795	1	4				0.0013578	19.59	0	4.7	0	1.8	31302000	0	31302000	0	0	0	0	0	0
Q3TWW8;Q8VE97;O35326	Q3TWW8;Q8VE97;O35326	1;1;1	1;1;1	1;1;1	Serine/arginine-rich splicing factor 6;Serine/arginine-rich splicing factor 4;Serine/arginine-rich splicing factor 5	Srsf6;Srsf4;Srsf5	sp|Q3TWW8|SRSF6_MOUSE Serine/arginine-rich splicing factor 6 OS=Mus musculus OX=10090 GN=Srsf6 PE=1 SV=1;sp|Q8VE97|SRSF4_MOUSE Serine/arginine-rich splicing factor 4 OS=Mus musculus OX=10090 GN=Srsf4 PE=2 SV=1;sp|O35326|SRSF5_MOUSE Serine/arginine-rich spl	3	1	1	1	1	1	0	1	1	1	0	1	1	1	0	1	2.7	2.7	2.7	39.025	339	339;489;269	3			3		0.0013532	7.428	2.7	2.7	0	2.7	70468000	18058000	34754000	0	17655000	0	0	0	0
O35344	O35344	4	4	4	Importin subunit alpha-4	Kpna3	sp|O35344|IMA4_MOUSE Importin subunit alpha-4 OS=Mus musculus OX=10090 GN=Kpna3 PE=1 SV=1	1	4	4	4	0	1	2	1	0	1	2	1	0	1	2	1	8.3	8.3	8.3	57.772	521	521	2.25		3	1		0.00075301	24.243	0	1.7	4.6	1.9	45384000	0	3870400	33393000	8121200	0	0	0	0
O35350	O35350	1	1	1	Calpain-1 catalytic subunit	Capn1	sp|O35350|CAN1_MOUSE Calpain-1 catalytic subunit OS=Mus musculus OX=10090 GN=Capn1 PE=1 SV=1	1	1	1	1	0	1	0	0	0	1	0	0	0	1	0	0	1.3	1.3	1.3	82.105	713	713	1	1				0.0058626	6.333	0	1.3	0	0	5066500	0	5066500	0	0	0	0	0	0
O35381;Q64G17	O35381	4;1	4;1	4;1	Acidic leucine-rich nuclear phosphoprotein 32 family member A	Anp32a	sp|O35381|AN32A_MOUSE Acidic leucine-rich nuclear phosphoprotein 32 family member A OS=Mus musculus OX=10090 GN=Anp32a PE=1 SV=1	2	4	4	4	3	2	2	2	3	2	2	2	3	2	2	2	13.8	13.8	13.8	28.537	247	247;123	3			10		0	65.905	13.4	8.1	8.5	8.1	489140000	163230000	169920000	72712000	83283000	301390000	308870000	0	294640000
O35382	O35382	4	4	4	Exocyst complex component 4	Exoc4	sp|O35382|EXOC4_MOUSE Exocyst complex component 4 OS=Mus musculus OX=10090 GN=Exoc4 PE=1 SV=2	1	4	4	4	0	4	0	2	0	4	0	2	0	4	0	2	4.7	4.7	4.7	110.54	975	975	1	6				0.00081037	26.372	0	4.7	0	2.1	50857000	0	33839000	0	17017000	0	14238000	0	16723000
O35387	O35387	1	1	1	HCLS1-associated protein X-1	Hax1	sp|O35387|HAX1_MOUSE HCLS1-associated protein X-1 OS=Mus musculus OX=10090 GN=Hax1 PE=1 SV=1	1	1	1	1	0	1	0	0	0	1	0	0	0	1	0	0	4.3	4.3	4.3	31.654	280	280	3			1		0.0030056	6.4552	0	4.3	0	0	4064300	0	4064300	0	0	0	0	0	0
O35405	O35405	4	4	4	Phospholipase D3	Pld3	sp|O35405|PLD3_MOUSE 5-3 exonuclease PLD3 OS=Mus musculus OX=10090 GN=Pld3 PE=1 SV=1	1	4	4	4	3	2	3	3	3	2	3	3	3	2	3	3	8.6	8.6	8.6	54.388	488	488	2.92		6	1	5	0	28.385	6.4	4.3	6.4	6.1	319890000	64783000	31661000	126250000	97193000	95546000	41050000	61092000	72440000
O35435	O35435	1	1	1	Dihydroorotate dehydrogenase (quinone), mitochondrial	Dhodh	sp|O35435|PYRD_MOUSE Dihydroorotate dehydrogenase (quinone), mitochondrial OS=Mus musculus OX=10090 GN=Dhodh PE=1 SV=2	1	1	1	1	0	0	1	1	0	0	1	1	0	0	1	1	2.3	2.3	2.3	42.699	395	395	2		2			0.0082406	6.2421	0	0	2.3	2.3	8715700	0	0	8715700	0	0	0	0	0
O35449	O35449	2	2	2	Proline-rich transmembrane protein 1	Prrt1	sp|O35449|PRRT1_MOUSE Proline-rich transmembrane protein 1 OS=Mus musculus OX=10090 GN=Prrt1 PE=1 SV=1	1	2	2	2	1	0	1	0	1	0	1	0	1	0	1	0	8.5	8.5	8.5	31.389	306	306	2.5		1	1		0.00098328	11.665	4.9	0	3.6	0	12404000	3305400	0	9098900	0	0	0	0	0
O35526	O35526	16	15	15	Syntaxin-1A	Stx1a	sp|O35526|STX1A_MOUSE Syntaxin-1A OS=Mus musculus OX=10090 GN=Stx1a PE=1 SV=3	1	16	15	15	7	15	12	11	7	14	11	11	7	14	11	11	49.7	47.2	47.2	33.054	288	288	2.96		6	72	3	0	323.31	25.7	49.7	45.1	36.5	14594000000	2091400000	5613100000	4867100000	2022300000	1559400000	2731000000	2909500000	2162300000
O35551	O35551	1	1	1	Rab GTPase-binding effector protein 1	Rabep1	sp|O35551|RABE1_MOUSE Rab GTPase-binding effector protein 1 OS=Mus musculus OX=10090 GN=Rabep1 PE=1 SV=2	1	1	1	1	0	1	0	1	0	1	0	1	0	1	0	1	1.2	1.2	1.2	99.523	862	862	1	2				0.0030316	6.518	0	1.2	0	1.2	10838000	0	5551200	0	5286600	0	0	0	0
O35593	O35593	3	3	3	26S proteasome non-ATPase regulatory subunit 14	Psmd14	sp|O35593|PSDE_MOUSE 26S proteasome non-ATPase regulatory subunit 14 OS=Mus musculus OX=10090 GN=Psmd14 PE=1 SV=2	1	3	3	3	1	3	1	1	1	3	1	1	1	3	1	1	11.9	11.9	11.9	34.577	310	310	3			6		0.0013803	20.223	4.2	11.9	4.2	4.2	149240000	33036000	48825000	40716000	26660000	0	0	0	0
O35609	O35609	3	3	3	Secretory carrier-associated membrane protein 3	Scamp3	sp|O35609|SCAM3_MOUSE Secretory carrier-associated membrane protein 3 OS=Mus musculus OX=10090 GN=Scamp3 PE=1 SV=3	1	3	3	3	0	3	1	0	0	3	1	0	0	3	1	0	12.9	12.9	12.9	38.458	349	349	2.5	1		3		0.0012338	17.77	0	12.9	3.7	0	24853000	0	19793000	5059400	0	0	0	0	0
O35621	O35621	7	7	6	Phosphomannomutase 1	Pmm1	sp|O35621|PMM1_MOUSE Phosphomannomutase 1 OS=Mus musculus OX=10090 GN=Pmm1 PE=1 SV=1	1	7	7	6	2	6	2	1	2	6	2	1	1	6	2	1	30.5	30.5	26.3	29.774	262	262	3			11		0	60.927	8.4	26.3	9.2	4.2	183260000	18751000	101360000	53236000	9906400	0	89593000	88443000	0
O35633	O35633	5	5	5	Vesicular inhibitory amino acid transporter	Slc32a1	sp|O35633|VIAAT_MOUSE Vesicular inhibitory amino acid transporter OS=Mus musculus OX=10090 GN=Slc32a1 PE=1 SV=3	1	5	5	5	0	5	1	5	0	5	1	5	0	5	1	5	8.2	8.2	8.2	57.38	525	525	1.67	8	5	1	1	0	44.934	0	8.2	2.1	8.2	244220000	0	60576000	41917000	141730000	0	31087000	0	50337000
O35639	O35639	5	5	5	Annexin A3	Anxa3	sp|O35639|ANXA3_MOUSE Annexin A3 OS=Mus musculus OX=10090 GN=Anxa3 PE=1 SV=4	1	5	5	5	0	0	4	3	0	0	4	3	0	0	4	3	14.2	14.2	14.2	36.384	323	323	3			7		0	30.56	0	0	11.8	8	44876000	0	0	32753000	12123000	0	0	25317000	31443000
O35643	O35643	26	13	13	AP-1 complex subunit beta-1	Ap1b1	sp|O35643|AP1B1_MOUSE AP-1 complex subunit beta-1 OS=Mus musculus OX=10090 GN=Ap1b1 PE=1 SV=2	1	26	13	13	10	22	15	24	3	9	4	11	3	9	4	11	31.5	18.1	18.1	103.93	943	943	1.46	23	8	4		0	97.929	11.5	23.4	18.7	30	1054500000	27067000	496670000	114310000	416410000	62238000	114130000	74312000	137350000
O35658	O35658	2	2	2	Complement component 1 Q subcomponent-binding protein, mitochondrial	C1qbp	sp|O35658|C1QBP_MOUSE Complement component 1 Q subcomponent-binding protein, mitochondrial OS=Mus musculus OX=10090 GN=C1qbp PE=1 SV=1	1	2	2	2	0	2	1	0	0	2	1	0	0	2	1	0	9.7	9.7	9.7	31.013	278	278	3			3		0.0010953	13.066	0	9.7	5	0	341250000	0	200480000	140770000	0	0	0	0	0
O35678	O35678	8	8	8	Monoglyceride lipase	Mgll	sp|O35678|MGLL_MOUSE Monoglyceride lipase OS=Mus musculus OX=10090 GN=Mgll PE=1 SV=1	1	8	8	8	2	6	7	3	2	6	7	3	2	6	7	3	28.7	28.7	28.7	33.387	303	303	3			20		0	54.694	6.3	22.1	24.1	9.6	618510000	32826000	285950000	230420000	69311000	0	177250000	131980000	160710000
O35682	O35682	2	2	2	Myeloid-associated differentiation marker	Myadm	sp|O35682|MYADM_MOUSE Myeloid-associated differentiation marker OS=Mus musculus OX=10090 GN=Myadm PE=1 SV=2	1	2	2	2	0	1	1	1	0	1	1	1	0	1	1	1	8.4	8.4	8.4	35.284	320	320	1.67	2		1		0.0010983	13.115	0	3.1	5.3	5.3	58362000	0	20692000	30846000	6824900	0	0	0	0
O35685	O35685	3	3	3	Nuclear migration protein nudC	Nudc	sp|O35685|NUDC_MOUSE Nuclear migration protein nudC OS=Mus musculus OX=10090 GN=Nudc PE=1 SV=1	1	3	3	3	0	0	3	1	0	0	3	1	0	0	3	1	9.3	9.3	9.3	38.358	332	332	2		4			0.0011926	17.25	0	0	9.3	3.3	57752000	0	0	39796000	17956000	0	0	0	0
O35737;P70333	O35737;P70333	5;3	5;3	3;2	Heterogeneous nuclear ribonucleoprotein H;Heterogeneous nuclear ribonucleoprotein H, N-terminally processed;Heterogeneous nuclear ribonucleoprotein H2	Hnrnph1;Hnrnph2	sp|O35737|HNRH1_MOUSE Heterogeneous nuclear ribonucleoprotein H OS=Mus musculus OX=10090 GN=Hnrnph1 PE=1 SV=3;sp|P70333|HNRH2_MOUSE Heterogeneous nuclear ribonucleoprotein H2 OS=Mus musculus OX=10090 GN=Hnrnph2 PE=1 SV=1	2	5	5	3	2	2	4	5	2	2	4	5	1	1	2	3	17.8	17.8	11.8	49.199	449	449;449	2.37		12	7		0	43.359	5.8	5.8	14	17.8	702450000	59625000	79069000	218090000	345660000	181920000	192460000	115020000	155890000
O35841	O35841	2	2	2	Apoptosis inhibitor 5	Api5	sp|O35841|API5_MOUSE Apoptosis inhibitor 5 OS=Mus musculus OX=10090 GN=Api5 PE=1 SV=2	1	2	2	2	0	0	1	2	0	0	1	2	0	0	1	2	5.4	5.4	5.4	56.784	504	504	2		3			0.0010384	12.195	0	0	2.2	5.4	32129000	0	0	9358300	22771000	0	0	0	0
O35857	O35857	5	5	5	Mitochondrial import inner membrane translocase subunit TIM44	Timm44	sp|O35857|TIM44_MOUSE Mitochondrial import inner membrane translocase subunit TIM44 OS=Mus musculus OX=10090 GN=Timm44 PE=1 SV=2	1	5	5	5	0	1	2	3	0	1	2	3	0	1	2	3	10.4	10.4	10.4	51.091	452	452	2.33		5		1	0	31.034	0	2.4	5.1	7.7	205740000	0	145340000	24237000	36167000	0	0	0	0
O35864	O35864	3	3	3	COP9 signalosome complex subunit 5	Cops5	sp|O35864|CSN5_MOUSE COP9 signalosome complex subunit 5 OS=Mus musculus OX=10090 GN=Cops5 PE=1 SV=3	1	3	3	3	0	2	2	1	0	2	2	1	0	2	2	1	7.5	7.5	7.5	37.548	334	334	3			5		0.0013746	19.968	0	5.4	5.1	3	113710000	0	24222000	81924000	7562100	0	0	0	0
O35874	O35874	3	3	3	Neutral amino acid transporter A	Slc1a4	sp|O35874|SATT_MOUSE Neutral amino acid transporter A OS=Mus musculus OX=10090 GN=Slc1a4 PE=1 SV=1	1	3	3	3	0	1	2	2	0	1	2	2	0	1	2	2	8.3	8.3	8.3	56.061	532	532	1.57	3	4			0.0013468	19.4	0	2.1	3.9	6.4	199610000	0	18346000	57507000	123760000	0	0	0	0
O35900	O35900	2	2	2	U6 snRNA-associated Sm-like protein LSm2	Lsm2	sp|O35900|LSM2_MOUSE U6 snRNA-associated Sm-like protein LSm2 OS=Mus musculus OX=10090 GN=Lsm2 PE=1 SV=1	1	2	2	2	0	1	1	1	0	1	1	1	0	1	1	1	31.6	31.6	31.6	10.834	95	95	2.67		2		1	0.00098184	11.652	0	20	11.6	20	62853000	0	12023000	28715000	22114000	0	0	0	0
O35927	O35927	9	9	8	Catenin delta-2	Ctnnd2	sp|O35927|CTND2_MOUSE Catenin delta-2 OS=Mus musculus OX=10090 GN=Ctnnd2 PE=1 SV=1	1	9	9	8	0	9	1	4	0	9	1	4	0	8	1	4	9.9	9.9	9.1	135	1247	1247	1	15				0	62.585	0	9.9	1.2	4.6	235220000	0	156260000	13042000	65918000	0	24744000	0	31319000
O35954	O35954	8	8	8	Membrane-associated phosphatidylinositol transfer protein 1	Pitpnm1	sp|O35954|PITM1_MOUSE Membrane-associated phosphatidylinositol transfer protein 1 OS=Mus musculus OX=10090 GN=Pitpnm1 PE=1 SV=1	1	8	8	8	0	6	2	8	0	6	2	8	0	6	2	8	6.8	6.8	6.8	134.94	1243	1243	1.11	16	2			0	50.019	0	5.2	1.7	6.8	174760000	0	72002000	8733200	94029000	0	20480000	12603000	31790000
O54734	O54734	4	4	4	Dolichyl-diphosphooligosaccharide--protein glycosyltransferase 48 kDa subunit	Ddost	sp|O54734|OST48_MOUSE Dolichyl-diphosphooligosaccharide--protein glycosyltransferase 48 kDa subunit OS=Mus musculus OX=10090 GN=Ddost PE=1 SV=2	1	4	4	4	1	1	2	2	1	1	2	2	1	1	2	2	9.5	9.5	9.5	49.027	441	441	2.33		4	2		0.00073964	23.797	2.5	2.5	4.5	4.5	72517000	7993000	3462900	23193000	37868000	0	0	0	0
O54774	O54774	15	15	15	AP-3 complex subunit delta-1	Ap3d1	sp|O54774|AP3D1_MOUSE AP-3 complex subunit delta-1 OS=Mus musculus OX=10090 GN=Ap3d1 PE=1 SV=1	1	15	15	15	1	12	4	11	1	12	4	11	1	12	4	11	16.8	16.8	16.8	135.08	1199	1199	1.25	25	6	1		0	99.077	0.9	13.4	3.3	11.8	568940000	8044700	326020000	38329000	196550000	0	51734000	35457000	50865000
O54781	O54781	4	4	4	SRSF protein kinase 2;SRSF protein kinase 2 N-terminal;SRSF protein kinase 2 C-terminal	Srpk2	sp|O54781|SRPK2_MOUSE SRSF protein kinase 2 OS=Mus musculus OX=10090 GN=Srpk2 PE=1 SV=2	1	4	4	4	0	3	0	2	0	3	0	2	0	3	0	2	6.5	6.5	6.5	76.756	681	681	1	5				0.0007278	23.284	0	5.1	0	3.1	59715000	0	47261000	0	12454000	0	0	0	0
O54818	O54818	2	2	2	Tumor protein D53	Tpd52l1	sp|O54818|TPD53_MOUSE Tumor protein D53 OS=Mus musculus OX=10090 GN=Tpd52l1 PE=1 SV=1	1	2	2	2	0	1	2	0	0	1	2	0	0	1	2	0	11.3	11.3	11.3	22.515	204	204	3			3		0.0010055	11.859	0	6.9	11.3	0	26683000	0	11218000	15465000	0	0	0	0	0
O54829	O54829	9	9	7	Regulator of G-protein signaling 7	Rgs7	sp|O54829|RGS7_MOUSE Regulator of G-protein signaling 7 OS=Mus musculus OX=10090 GN=Rgs7 PE=1 SV=2	1	9	9	7	4	2	7	9	4	2	7	9	3	1	6	7	16.8	16.8	11.7	54.791	469	469	2.36		19	3	3	0	75.004	9.8	4.9	13.9	16.8	712800000	97492000	33578000	244840000	336890000	146520000	84806000	101100000	153180000
O54833	O54833	4	4	4	Casein kinase II subunit alpha	Csnk2a2	sp|O54833|CSK22_MOUSE Casein kinase II subunit alpha OS=Mus musculus OX=10090 GN=Csnk2a2 PE=1 SV=1	1	4	4	4	2	0	0	2	2	0	0	2	2	0	0	2	14	14	14	41.215	350	350	2.75		1	3		0.000777	25.004	7.7	0	0	6.3	39720000	27141000	0	0	12579000	0	0	0	0
O54865	O54865	10	10	10	Guanylate cyclase soluble subunit beta-1	Gucy1b3	sp|O54865|GCYB1_MOUSE Guanylate cyclase soluble subunit beta-1 OS=Mus musculus OX=10090 GN=Gucy1b1 PE=1 SV=1	1	10	10	10	0	1	8	9	0	1	8	9	0	1	8	9	17.6	17.6	17.6	70.597	620	620	1.89	2	16			0	66.717	0	1.8	14.4	16.3	260310000	0	8632500	135260000	116420000	0	0	38165000	35953000
O54901	O54901	3	3	3	OX-2 membrane glycoprotein	Cd200	sp|O54901|OX2G_MOUSE OX-2 membrane glycoprotein OS=Mus musculus OX=10090 GN=Cd200 PE=1 SV=1	1	3	3	3	0	0	3	3	0	0	3	3	0	0	3	3	12.6	12.6	12.6	31.256	278	278	2		6			0	35.708	0	0	12.6	12.6	126130000	0	0	44723000	81406000	0	0	38767000	62438000
O54946;Q9QYI8;Q9QYI5	O54946;Q9QYI8	3;2;1	3;2;1	3;2;1	DnaJ homolog subfamily B member 6;DnaJ homolog subfamily B member 7	Dnajb6;Dnajb7	sp|O54946|DNJB6_MOUSE DnaJ homolog subfamily B member 6 OS=Mus musculus OX=10090 GN=Dnajb6 PE=1 SV=4;sp|Q9QYI8|DNJB7_MOUSE DnaJ homolog subfamily B member 7 OS=Mus musculus OX=10090 GN=Dnajb7 PE=2 SV=2	3	3	3	3	0	2	1	3	0	2	1	3	0	2	1	3	9.9	9.9	9.9	39.807	365	365;312;324	3			8		0.00082713	27.695	0	7.1	3	9.9	161540000	0	65297000	40529000	55719000	0	0	0	0
O54983	O54983	10	10	10	Ketimine reductase mu-crystallin	Crym	sp|O54983|CRYM_MOUSE Ketimine reductase mu-crystallin OS=Mus musculus OX=10090 GN=Crym PE=1 SV=1	1	10	10	10	3	9	10	8	3	9	10	8	3	9	10	8	33.5	33.5	33.5	33.523	313	313	3		1	32	1	0	300.03	10.5	30	33.5	27.2	1784400000	65735000	407750000	1131200000	179680000	127440000	240610000	537860000	281970000
O54984	O54984	5	5	5	ATPase Asna1	Asna1	sp|O54984|GET3_MOUSE ATPase GET3 OS=Mus musculus OX=10090 GN=Get3 PE=1 SV=2	1	5	5	5	2	1	4	4	2	1	4	4	2	1	4	4	16.1	16.1	16.1	38.822	348	348	2.33		8	4		0	31.943	5.2	2.9	14.1	13.5	192650000	27029000	9908300	85383000	70334000	74042000	0	35365000	48070000
O54988	O54988	2	2	2	STE20-like serine/threonine-protein kinase	Slk	sp|O54988|SLK_MOUSE STE20-like serine/threonine-protein kinase OS=Mus musculus OX=10090 GN=Slk PE=1 SV=2	1	2	2	2	0	0	0	2	0	0	0	2	0	0	0	2	1.4	1.4	1.4	141.46	1233	1233	1	2				0.0013921	11.147	0	0	0	1.4	8170400	0	0	0	8170400	0	0	0	0
O54991	O54991	13	13	13	Contactin-associated protein 1	Cntnap1	sp|O54991|CNTP1_MOUSE Contactin-associated protein 1 OS=Mus musculus OX=10090 GN=Cntnap1 PE=1 SV=2	1	13	13	13	0	10	3	9	0	10	3	9	0	10	3	9	9.6	9.6	9.6	156.31	1385	1385	1.08	22	2			0	91.418	0	7.7	2.5	6.6	449360000	0	233080000	30377000	185890000	0	53234000	30169000	47088000
O55013	O55013	4	4	4	Trafficking protein particle complex subunit 3	Trappc3	sp|O55013|TPPC3_MOUSE Trafficking protein particle complex subunit 3 OS=Mus musculus OX=10090 GN=Trappc3 PE=1 SV=1	1	4	4	4	0	4	1	0	0	4	1	0	0	4	1	0	23.3	23.3	23.3	20.302	180	180	4				5	0	29.281	0	23.3	4.4	0	176830000	0	160980000	15852000	0	0	0	0	0
O55022	O55022	8	8	8	Membrane-associated progesterone receptor component 1	Pgrmc1	sp|O55022|PGRC1_MOUSE Membrane-associated progesterone receptor component 1 OS=Mus musculus OX=10090 GN=Pgrmc1 PE=1 SV=4	1	8	8	8	4	8	6	4	4	8	6	4	4	8	6	4	27.2	27.2	27.2	21.694	195	195	3.12			22	3	0	55.938	22.1	27.2	26.7	19	919430000	241880000	373170000	241370000	63005000	265910000	291720000	255530000	217020000
O55023	O55023	9	9	9	Inositol monophosphatase 1	Impa1	sp|O55023|IMPA1_MOUSE Inositol monophosphatase 1 OS=Mus musculus OX=10090 GN=Impa1 PE=1 SV=1	1	9	9	9	5	8	6	6	5	8	6	6	5	8	6	6	28.9	28.9	28.9	30.436	277	277	3.11			25	3	0	97.67	15.5	24.5	19.9	20.2	1574300000	306840000	626910000	381470000	259050000	378040000	403730000	290960000	356560000
O55026	O55026	2	2	2	Ectonucleoside triphosphate diphosphohydrolase 2	Entpd2	sp|O55026|ENTP2_MOUSE Ectonucleoside triphosphate diphosphohydrolase 2 OS=Mus musculus OX=10090 GN=Entpd2 PE=1 SV=2	1	2	2	2	0	0	2	2	0	0	2	2	0	0	2	2	4.2	4.2	4.2	54.319	495	495	2		4			0.0011192	13.557	0	0	4.2	4.2	29914000	0	0	12352000	17562000	0	0	11237000	14379000
O55029	O55029	4	4	4	Coatomer subunit beta	Copb2	sp|O55029|COPB2_MOUSE Coatomer subunit beta OS=Mus musculus OX=10090 GN=Copb2 PE=1 SV=2	1	4	4	4	0	2	2	1	0	2	2	1	0	2	2	1	4.6	4.6	4.6	102.45	905	905	1	5				0.0007391	23.771	0	2.3	2.3	1	53633000	0	23476000	14563000	15593000	0	0	0	0
O55033	O55033	1	1	1	Cytoplasmic protein NCK2	Nck2	sp|O55033|NCK2_MOUSE Cytoplasmic protein NCK2 OS=Mus musculus OX=10090 GN=Nck2 PE=1 SV=1	1	1	1	1	0	0	1	1	0	0	1	1	0	0	1	1	2.4	2.4	2.4	42.879	380	380	2		2			0.0058455	6.3263	0	0	2.4	2.4	11735000	0	0	5642500	6092300	0	0	0	0
O55042	O55042	8	8	6	Alpha-synuclein	Snca	sp|O55042|SYUA_MOUSE Alpha-synuclein OS=Mus musculus OX=10090 GN=Snca PE=1 SV=2	1	8	8	6	7	7	6	7	7	7	6	7	5	5	4	5	46.4	46.4	38.6	14.485	140	140	3.88			5	38	0	323.31	45.7	46.4	44.3	45.7	8179100000	2400300000	3247300000	1696200000	835280000	1499800000	1332300000	3272200000	1063600000
O55074;Q7TN79	O55074;Q7TN79	3;3	3;3	3;3	A-kinase anchor protein 7 isoform alpha;A-kinase anchor protein 7 isoform gamma	Akap7	sp|O55074|AKA7A_MOUSE A-kinase anchor protein 7 isoform alpha OS=Mus musculus OX=10090 GN=Akap7 PE=1 SV=4;sp|Q7TN79|AKA7G_MOUSE A-kinase anchor protein 7 isoform gamma OS=Mus musculus OX=10090 GN=Akap7 PE=1 SV=2	2	3	3	3	2	1	0	0	2	1	0	0	2	1	0	0	35.8	35.8	35.8	9.169	81	81;314	4				3	0.0012987	18.706	21	14.8	0	0	33365000	21471000	11894000	0	0	0	0	0	0
O55091	O55091	4	4	4	Protein IMPACT	Impact	sp|O55091|IMPCT_MOUSE Protein IMPACT OS=Mus musculus OX=10090 GN=Impact PE=1 SV=2	1	4	4	4	0	0	3	1	0	0	3	1	0	0	3	1	12.9	12.9	12.9	36.276	318	318	2		4			0.00076923	24.764	0	0	9.4	3.5	74172000	0	0	60410000	13762000	0	0	0	0
O55100	O55100	3	3	3	Synaptogyrin-1	Syngr1	sp|O55100|SNG1_MOUSE Synaptogyrin-1 OS=Mus musculus OX=10090 GN=Syngr1 PE=1 SV=2	1	3	3	3	2	3	2	2	2	3	2	2	2	3	2	2	14.5	14.5	14.5	25.652	234	234	2.86	4	2	9	7	0	234.94	10.3	14.5	10.3	10.3	3387800000	615220000	1416000000	695640000	660970000	855630000	1715200000	1174000000	1358900000
O55106	O55106	2	2	2	Striatin	Strn	sp|O55106|STRN_MOUSE Striatin OS=Mus musculus OX=10090 GN=Strn PE=1 SV=2	1	2	2	2	0	2	0	0	0	2	0	0	0	2	0	0	4.5	4.5	4.5	85.965	780	780	1	2				0.0010971	13.102	0	4.5	0	0	14997000	0	14997000	0	0	0	0	0	0
O55125	O55125	4	4	4	Protein NipSnap homolog 1	Nipsnap1	sp|O55125|NIPS1_MOUSE Protein NipSnap homolog 1 OS=Mus musculus OX=10090 GN=Nipsnap1 PE=1 SV=1	1	4	4	4	1	4	3	1	1	4	3	1	1	4	3	1	11.6	11.6	11.6	33.363	284	284	3.09			10	1	0	38.831	3.2	11.6	8.5	5.3	1034100000	189860000	509630000	323660000	10927000	0	637760000	567640000	0
O55126	O55126	4	4	4	Protein NipSnap homolog 2	Gbas	sp|O55126|NIPS2_MOUSE Protein NipSnap homolog 2 OS=Mus musculus OX=10090 GN=Nipsnap2 PE=1 SV=1	1	4	4	4	2	4	3	2	2	4	3	2	2	4	3	2	14.6	14.6	14.6	32.932	281	281	3			12		0	155.9	8.9	14.6	12.1	7.1	1075200000	142520000	481970000	280150000	170510000	446190000	510810000	360320000	417990000
O55131;Q8C650;Q9DA97	O55131	13;1;1	13;1;1	13;1;1	Septin-7	Sept7	sp|O55131|SEPT7_MOUSE Septin-7 OS=Mus musculus OX=10090 GN=Septin7 PE=1 SV=1	3	13	13	13	6	4	13	13	6	4	13	13	6	4	13	13	32.6	32.6	32.6	50.549	436	436;452;430	2.2	10	45	15	5	0	126.53	18.8	9.6	32.6	32.6	8500100000	1054000000	422660000	3158500000	3865000000	772830000	784530000	913590000	914910000
O55135	O55135	2	2	2	Eukaryotic translation initiation factor 6	Eif6	sp|O55135|IF6_MOUSE Eukaryotic translation initiation factor 6 OS=Mus musculus OX=10090 GN=Eif6 PE=1 SV=2	1	2	2	2	0	2	1	0	0	2	1	0	0	2	1	0	11.4	11.4	11.4	26.511	245	245	3			3		0.001032	12.12	0	11.4	4.1	0	52393000	0	36204000	16189000	0	0	0	0	0
O55137;Q9QYR9;Q9QYR7;Q8BWN8;Q6Q2Z6;Q32Q92	O55137;Q9QYR9;Q9QYR7;Q8BWN8;Q6Q2Z6;Q32Q92	2;2;1;1;1;1	2;2;1;1;1;1	2;2;1;1;1;1	Acyl-coenzyme A thioesterase 1;Acyl-coenzyme A thioesterase 2, mitochondrial;Acyl-coenzyme A thioesterase 3;Acyl-coenzyme A thioesterase 4;Acyl-coenzyme A thioesterase 5;Acyl-coenzyme A thioesterase 6	Acot1;Acot2;Acot3;Acot4;Acot5;Acot6	sp|O55137|ACOT1_MOUSE Acyl-coenzyme A thioesterase 1 OS=Mus musculus OX=10090 GN=Acot1 PE=1 SV=1;sp|Q9QYR9|ACOT2_MOUSE Acyl-coenzyme A thioesterase 2, mitochondrial OS=Mus musculus OX=10090 GN=Acot2 PE=1 SV=2;sp|Q9QYR7|ACOT3_MOUSE Acyl-coenzyme A thioester	6	2	2	2	0	0	1	2	0	0	1	2	0	0	1	2	4.5	4.5	4.5	46.135	419	419;453;432;421;421;419	2		3			0.00097609	11.615	0	0	2.6	4.5	41206000	0	0	18924000	22282000	0	0	0	0
O55142	O55142	3	3	3	60S ribosomal protein L35a	Rpl35a	sp|O55142|RL35A_MOUSE 60S ribosomal protein L35a OS=Mus musculus OX=10090 GN=Rpl35a PE=1 SV=2	1	3	3	3	1	3	0	1	1	3	0	1	1	3	0	1	15.5	15.5	15.5	12.554	110	110	4				5	0.001387	20.425	8.2	15.5	0	8.2	164330000	33228000	110070000	0	21031000	0	0	0	0
O55143;Q8R429;Q64518	O55143	27;12;3	27;12;3	27;12;3	Sarcoplasmic/endoplasmic reticulum calcium ATPase 2	Atp2a2	sp|O55143|AT2A2_MOUSE Sarcoplasmic/endoplasmic reticulum calcium ATPase 2 OS=Mus musculus OX=10090 GN=Atp2a2 PE=1 SV=2	3	27	27	27	6	24	11	22	6	24	11	22	6	24	11	22	28.5	28.5	28.5	114.86	1044	1044;994;999	1.21	72	6	6		0	259.69	6	26.2	10.3	20	4718200000	147990000	2234000000	464760000	1871400000	296980000	378070000	286860000	418750000
O55222	O55222	1	1	1	Integrin-linked protein kinase	Ilk	sp|O55222|ILK_MOUSE Integrin-linked protein kinase OS=Mus musculus OX=10090 GN=Ilk PE=1 SV=2	1	1	1	1	0	0	0	1	0	0	0	1	0	0	0	1	3.1	3.1	3.1	51.373	452	452	2		1			0.0082102	6.2242	0	0	0	3.1	3970600	0	0	0	3970600	0	0	0	0
O55234	O55234	10	10	10	Proteasome subunit beta type-5	Psmb5	sp|O55234|PSB5_MOUSE Proteasome subunit beta type-5 OS=Mus musculus OX=10090 GN=Psmb5 PE=1 SV=3	1	10	10	10	9	9	5	7	9	9	5	7	9	9	5	7	35.2	35.2	35.2	28.532	264	264	3.37			26	15	0	113.93	34.8	35.2	23.5	31.1	1198600000	377520000	550970000	146420000	123700000	224710000	277780000	161880000	207950000
O70133	O70133	9	9	9	ATP-dependent RNA helicase A	Dhx9	sp|O70133|DHX9_MOUSE ATP-dependent RNA helicase A OS=Mus musculus OX=10090 GN=Dhx9 PE=1 SV=2	1	9	9	9	1	7	1	7	1	7	1	7	1	7	1	7	7.2	7.2	7.2	149.47	1380	1380	1.26	17		1	1	0	64.99	0.6	5.7	0.9	5.5	344310000	7031800	196370000	10233000	130670000	0	36689000	0	36619000
O70161;P70182;P70181	O70161	14;3;2	14;3;2	14;3;2	Phosphatidylinositol 4-phosphate 5-kinase type-1 gamma	Pip5k1c	sp|O70161|PI51C_MOUSE Phosphatidylinositol 4-phosphate 5-kinase type-1 gamma OS=Mus musculus OX=10090 GN=Pip5k1c PE=1 SV=2	3	14	14	14	2	10	3	10	2	10	3	10	2	10	3	10	27.5	27.5	27.5	72.407	661	661;546;539	1.27	25	2	3		0	96.903	5.3	26.2	6.1	21.3	839520000	20433000	524420000	28845000	265820000	35210000	142360000	17663000	102300000
O70172	O70172	5	5	3	Phosphatidylinositol 5-phosphate 4-kinase type-2 alpha	Pip4k2a	sp|O70172|PI42A_MOUSE Phosphatidylinositol 5-phosphate 4-kinase type-2 alpha OS=Mus musculus OX=10090 GN=Pip4k2a PE=1 SV=1	1	5	5	3	1	1	4	3	1	1	4	3	0	0	2	2	16.3	16.3	9.9	46.151	405	405	2.27		8	3		0	31.747	2.2	2.2	12.6	9.4	363630000	26254000	7621300	178960000	150790000	0	0	87394000	90386000
O70194	O70194	1	1	1	Eukaryotic translation initiation factor 3 subunit D	Eif3d	sp|O70194|EIF3D_MOUSE Eukaryotic translation initiation factor 3 subunit D OS=Mus musculus OX=10090 GN=Eif3d PE=1 SV=2	1	1	1	1	0	0	1	1	0	0	1	1	0	0	1	1	1.8	1.8	1.8	63.988	548	548	2		2			0.0013489	7.32	0	0	1.8	1.8	27729000	0	0	12512000	15218000	0	0	0	0
O70251	O70251	3	3	3	Elongation factor 1-beta	Eef1b	sp|O70251|EF1B_MOUSE Elongation factor 1-beta OS=Mus musculus OX=10090 GN=Eef1b PE=1 SV=5	1	3	3	3	3	3	2	2	3	3	2	2	3	3	2	2	16.4	16.4	16.4	24.693	225	225	3.17			10	2	0.0014055	21.282	16.4	16.4	9.8	10.7	894620000	220470000	457870000	107410000	108880000	366740000	475840000	254100000	279780000
O70252	O70252	4	4	4	Heme oxygenase 2	Hmox2	sp|O70252|HMOX2_MOUSE Heme oxygenase 2 OS=Mus musculus OX=10090 GN=Hmox2 PE=1 SV=1	1	4	4	4	0	4	0	1	0	4	0	1	0	4	0	1	16.8	16.8	16.8	35.738	315	315	3			5		0	38.773	0	16.8	0	2.9	95597000	0	85530000	0	10066000	0	0	0	0
O70274;Q63739	O70274;Q63739	2;1	2;1	2;1	Protein tyrosine phosphatase type IVA 2;Protein tyrosine phosphatase type IVA 1	Ptp4a2;Ptp4a1	sp|O70274|TP4A2_MOUSE Protein tyrosine phosphatase type IVA 2 OS=Mus musculus OX=10090 GN=Ptp4a2 PE=1 SV=1;sp|Q63739|TP4A1_MOUSE Protein tyrosine phosphatase type IVA 1 OS=Mus musculus OX=10090 GN=Ptp4a1 PE=1 SV=1	2	2	2	2	1	2	0	0	1	2	0	0	1	2	0	0	13.2	13.2	13.2	19.127	167	167;173	3.67			1	2	0.0010315	12.12	4.8	13.2	0	0	52096000	4477200	47618000	0	0	0	0	0	0
O70310	O70310	3	3	1	Glycylpeptide N-tetradecanoyltransferase 1	Nmt1	sp|O70310|NMT1_MOUSE Glycylpeptide N-tetradecanoyltransferase 1 OS=Mus musculus OX=10090 GN=Nmt1 PE=1 SV=1	1	3	3	1	0	0	1	3	0	0	1	3	0	0	1	1	6.9	6.9	2.6	56.888	496	496	2		4			0	34.208	0	0	2.6	6.9	68421000	0	0	25661000	42760000	0	0	0	0
O70318	O70318	9	7	7	Band 4.1-like protein 2	Epb41l2	sp|O70318|E41L2_MOUSE Band 4.1-like protein 2 OS=Mus musculus OX=10090 GN=Epb41l2 PE=1 SV=2	1	9	7	7	0	7	3	6	0	5	3	4	0	5	3	4	11.4	9.5	9.5	109.94	988	988	1.08	11	1			0	44.441	0	8.5	3.7	7.8	331000000	0	139830000	30126000	161050000	0	52393000	38846000	83497000
O70325	O70325	2	2	2	Phospholipid hydroperoxide glutathione peroxidase, mitochondrial	Gpx4	sp|O70325|GPX4_MOUSE Phospholipid hydroperoxide glutathione peroxidase OS=Mus musculus OX=10090 GN=Gpx4 PE=1 SV=4	1	2	2	2	0	2	0	1	0	2	0	1	0	2	0	1	10.2	10.2	10.2	22.228	197	197	3.75			1	3	0.0010811	12.779	0	10.2	0	4.6	55321000	0	44036000	0	11285000	0	0	0	0
O70433	O70433	1	1	1	Four and a half LIM domains protein 2	Fhl2	sp|O70433|FHL2_MOUSE Four and a half LIM domains protein 2 OS=Mus musculus OX=10090 GN=Fhl2 PE=1 SV=1	1	1	1	1	0	1	0	0	0	1	0	0	0	1	0	0	3.9	3.9	3.9	32.072	279	279	3			1		0.0062552	6.3047	0	3.9	0	0	4484900	0	4484900	0	0	0	0	0	0
O70435	O70435	6	6	6	Proteasome subunit alpha type-3	Psma3	sp|O70435|PSA3_MOUSE Proteasome subunit alpha type-3 OS=Mus musculus OX=10090 GN=Psma3 PE=1 SV=3	1	6	6	6	5	5	4	4	5	5	4	4	5	5	4	4	25.9	25.9	25.9	28.405	255	255	3.15			22	4	0	66.207	22.4	22.4	17.6	17.6	844640000	163210000	381160000	179220000	121050000	252080000	269830000	193640000	239690000
O70439	O70439	2	2	2	Syntaxin-7	Stx7	sp|O70439|STX7_MOUSE Syntaxin-7 OS=Mus musculus OX=10090 GN=Stx7 PE=1 SV=3	1	2	2	2	0	2	1	0	0	2	1	0	0	2	1	0	11.1	11.1	11.1	29.82	261	261	3			3		0.0011737	16.945	0	11.1	5.4	0	103020000	0	51162000	51863000	0	0	0	0	0
O70443	O70443	7	7	7	Guanine nucleotide-binding protein G(z) subunit alpha	Gnaz	sp|O70443|GNAZ_MOUSE Guanine nucleotide-binding protein G(z) subunit alpha OS=Mus musculus OX=10090 GN=Gnaz PE=1 SV=4	1	7	7	7	2	2	4	6	2	2	4	6	2	2	4	6	31.3	31.3	31.3	40.849	355	355	2.4	1	11	7	1	0	54.63	7.9	9.6	15.2	25.1	517110000	21991000	13662000	178540000	302910000	73126000	0	80881000	116690000
O70456	O70456	3	1	1	14-3-3 protein sigma	Sfn	sp|O70456|1433S_MOUSE 14-3-3 protein sigma OS=Mus musculus OX=10090 GN=Sfn PE=1 SV=2	1	3	1	1	2	3	3	2	0	1	1	0	0	1	1	0	10.5	3.2	3.2	27.706	248	248	3			2		0.0013483	7.3165	7.3	10.5	10.5	7.3	970320000	0	872850000	97468000	0	0	0	0	0
O70492	O70492	6	5	5	Sorting nexin-3	Snx3	sp|O70492|SNX3_MOUSE Sorting nexin-3 OS=Mus musculus OX=10090 GN=Snx3 PE=1 SV=3	1	6	5	5	1	5	3	1	1	4	3	1	1	4	3	1	25.9	21.6	21.6	18.757	162	162	4				9	0	31.493	5.6	25.3	17.3	6.2	215490000	47502000	96528000	63430000	8025700	0	0	0	0
O70493	O70493	6	6	5	Sorting nexin-12	Snx12	sp|O70493|SNX12_MOUSE Sorting nexin-12 OS=Mus musculus OX=10090 GN=Snx12 PE=1 SV=1	1	6	6	5	2	6	1	3	2	6	1	3	2	5	1	3	33.9	33.9	29.7	19.116	165	165	3.92			1	12	0	42.139	11.5	33.9	5.5	17	283830000	41258000	218450000	7820800	16306000	89104000	85443000	0	76014000
O70503	O70503	2	2	2	Very-long-chain 3-oxoacyl-CoA reductase	Hsd17b12	sp|O70503|DHB12_MOUSE Very-long-chain 3-oxoacyl-CoA reductase OS=Mus musculus OX=10090 GN=Hsd17b12 PE=1 SV=1	1	2	2	2	2	1	1	0	2	1	1	0	2	1	1	0	8	8	8	34.741	312	312	3			4		0.0011001	13.175	8	5.1	5.1	0	108760000	50910000	35773000	22080000	0	0	0	0	0
O70566	O70566	2	2	2	Protein diaphanous homolog 2	Diaph2	sp|O70566|DIAP2_MOUSE Protein diaphanous homolog 2 OS=Mus musculus OX=10090 GN=Diaph2 PE=1 SV=2	1	2	2	2	0	1	1	1	0	1	1	1	0	1	1	1	2.4	2.4	2.4	124.87	1098	1098	1.33	2	1			0.0014347	11.456	0	1.5	0.9	0.9	35329000	0	7392800	22272000	5664700	0	0	0	0
O70589	O70589	5	5	5	Peripheral plasma membrane protein CASK	Cask	sp|O70589|CSKP_MOUSE Peripheral plasma membrane protein CASK OS=Mus musculus OX=10090 GN=Cask PE=1 SV=2	1	5	5	5	0	5	2	3	0	5	2	3	0	5	2	3	5.8	5.8	5.8	105.11	926	926	1.36	9		2		0	35.181	0	5.8	2.3	3.6	133090000	0	91431000	12854000	28807000	0	32965000	22847000	28788000
O70591	O70591	2	2	2	Prefoldin subunit 2	Pfdn2	sp|O70591|PFD2_MOUSE Prefoldin subunit 2 OS=Mus musculus OX=10090 GN=Pfdn2 PE=1 SV=2	1	2	2	2	0	2	0	0	0	2	0	0	0	2	0	0	16.9	16.9	16.9	16.534	154	154	4				2	0	29.781	0	16.9	0	0	72291000	0	72291000	0	0	0	0	0	0
O88307	O88307	2	2	2	Sortilin-related receptor	Sorl1	sp|O88307|SORL_MOUSE Sortilin-related receptor OS=Mus musculus OX=10090 GN=Sorl1 PE=1 SV=3	1	2	2	2	0	2	0	0	0	2	0	0	0	2	0	0	0.9	0.9	0.9	247.08	2215	2215	1	2				0.0014032	11.281	0	0.9	0	0	6524100	0	6524100	0	0	0	0	0	0
O88322	O88322	2	2	2	Nidogen-2	Nid2	sp|O88322|NID2_MOUSE Nidogen-2 OS=Mus musculus OX=10090 GN=Nid2 PE=1 SV=2	1	2	2	2	0	0	0	2	0	0	0	2	0	0	0	2	1.4	1.4	1.4	153.91	1403	1403	1	2				0.001002	11.831	0	0	0	1.4	18489000	0	0	0	18489000	0	0	0	0
O88342	O88342	20	20	20	WD repeat-containing protein 1	Wdr1	sp|O88342|WDR1_MOUSE WD repeat-containing protein 1 OS=Mus musculus OX=10090 GN=Wdr1 PE=1 SV=3	1	20	20	20	5	4	15	17	5	4	15	17	5	4	15	17	40.3	40.3	40.3	66.406	606	606	2.16	2	34	9		0	166	10.4	9.1	34	33.5	2417100000	165730000	98587000	1064400000	1088400000	242320000	123690000	351010000	337310000
O88343	O88343	6	5	5	Electrogenic sodium bicarbonate cotransporter 1	Slc4a4	sp|O88343|S4A4_MOUSE Electrogenic sodium bicarbonate cotransporter 1 OS=Mus musculus OX=10090 GN=Slc4a4 PE=1 SV=2	1	6	5	5	1	5	0	2	1	4	0	1	1	4	0	1	6.6	5.7	5.7	121.48	1079	1079	1	6				0	43.739	1.3	5.3	0	1.9	223810000	35160000	137990000	0	50663000	0	0	0	0
O88384	O88384	5	5	5	Vesicle transport through interaction with t-SNAREs homolog 1B	Vti1b	sp|O88384|VTI1B_MOUSE Vesicle transport through interaction with t-SNAREs homolog 1B OS=Mus musculus OX=10090 GN=Vti1b PE=1 SV=1	1	5	5	5	2	3	3	1	2	3	3	1	2	3	3	1	25.4	25.4	25.4	26.713	232	232	3			9		0	34.119	10.8	15.9	15.1	5.2	176630000	27407000	93912000	43346000	11965000	60466000	0	46805000	0
O88441	O88441	3	3	3	Metaxin-2	Mtx2	sp|O88441|MTX2_MOUSE Metaxin-2 OS=Mus musculus OX=10090 GN=Mtx2 PE=1 SV=1	1	3	3	3	1	2	1	1	1	2	1	1	1	2	1	1	13.3	13.3	13.3	29.758	263	263	3			5		0.0013123	18.832	3.8	8.4	4.9	3.8	154100000	45003000	64980000	15611000	28502000	0	0	0	0
O88447	O88447	8	8	5	Kinesin light chain 1	Klc1	sp|O88447|KLC1_MOUSE Kinesin light chain 1 OS=Mus musculus OX=10090 GN=Klc1 PE=1 SV=3	1	8	8	5	0	2	5	7	0	2	5	7	0	0	4	4	19.2	19.2	9.4	61.449	541	541	1.86	2	12			0	80.236	0	5.9	11.6	16.8	244290000	0	14674000	100390000	129230000	0	11828000	33399000	61689000
O88448;Q9DBS5	O88448	7;1	4;0	4;0	Kinesin light chain 2	Klc2	sp|O88448|KLC2_MOUSE Kinesin light chain 2 OS=Mus musculus OX=10090 GN=Klc2 PE=1 SV=1	2	7	4	4	0	3	3	7	0	1	2	4	0	1	2	4	15.7	6.8	6.8	66.662	599	599;619	1.86	1	6			0.00074963	24.148	0	7.2	5.8	15.7	53087000	0	4759300	11411000	36917000	0	0	16597000	14046000
O88456	O88456	3	3	3	Calpain small subunit 1	Capns1	sp|O88456|CPNS1_MOUSE Calpain small subunit 1 OS=Mus musculus OX=10090 GN=Capns1 PE=1 SV=1	1	3	3	3	1	3	1	0	1	3	1	0	1	3	1	0	17.8	17.8	17.8	28.463	269	269	3			5		0	44.517	5.6	17.8	5.6	0	226960000	21987000	89631000	115350000	0	0	0	0	0
O88485	O88485	5	5	4	Cytoplasmic dynein 1 intermediate chain 1	Dync1i1	sp|O88485|DC1I1_MOUSE Cytoplasmic dynein 1 intermediate chain 1 OS=Mus musculus OX=10090 GN=Dync1i1 PE=1 SV=2	1	5	5	4	0	4	1	3	0	4	1	3	0	4	1	2	11	11	9.1	70.724	628	628	1.25	9	3			0	39.392	0	9.1	1.4	5.3	173010000	0	96373000	18369000	58270000	0	41787000	0	33117000
O88487	O88487	3	2	2	Cytoplasmic dynein 1 intermediate chain 2	Dync1i2	sp|O88487|DC1I2_MOUSE Cytoplasmic dynein 1 intermediate chain 2 OS=Mus musculus OX=10090 GN=Dync1i2 PE=1 SV=1	1	3	2	2	0	2	0	1	0	2	0	0	0	2	0	0	8.2	6.2	6.2	68.393	612	612	1	2				0.0014486	11.538	0	6.2	0	2	58012000	0	58012000	0	0	0	0	0	0
O88502	O88502	1	1	1	High affinity cAMP-specific and IBMX-insensitive 3,5-cyclic phosphodiesterase 8A	Pde8a	sp|O88502|PDE8A_MOUSE High affinity cAMP-specific and IBMX-insensitive 3,5-cyclic phosphodiesterase 8A OS=Mus musculus OX=10090 GN=Pde8a PE=1 SV=1	1	1	1	1	0	1	0	1	0	1	0	1	0	1	0	1	1.2	1.2	1.2	93.17	823	823	1	2				0.0026132	6.6447	0	1.2	0	1.2	60797000	0	35575000	0	25222000	0	0	0	0
O88507	O88507	3	3	3	Ciliary neurotrophic factor receptor subunit alpha	Cntfr	sp|O88507|CNTFR_MOUSE Ciliary neurotrophic factor receptor subunit alpha OS=Mus musculus OX=10090 GN=Cntfr PE=1 SV=2	1	3	3	3	1	1	1	3	1	1	1	3	1	1	1	3	13.7	13.7	13.7	40.801	372	372	2.43		4	3		0.0013736	19.947	2.4	2.4	2.4	13.7	89223000	10690000	6393100	15999000	56142000	0	0	0	0
O88512	O88512	1	1	1	AP-1 complex subunit gamma-like 2	Ap1g2	sp|O88512|AP1G2_MOUSE AP-1 complex subunit gamma-like 2 OS=Mus musculus OX=10090 GN=Ap1g2 PE=1 SV=2	1	1	1	1	1	0	0	0	1	0	0	0	1	0	0	0	1.1	1.1	1.1	87.862	791	791	3			1		0.005848	6.3263	1.1	0	0	0	4343500	4343500	0	0	0	0	0	0	0
O88531	O88531	2	2	2	Palmitoyl-protein thioesterase 1	Ppt1	sp|O88531|PPT1_MOUSE Palmitoyl-protein thioesterase 1 OS=Mus musculus OX=10090 GN=Ppt1 PE=1 SV=2	1	2	2	2	0	0	2	0	0	0	2	0	0	0	2	0	8.5	8.5	8.5	34.49	306	306	3			2		0.00099059	11.721	0	0	8.5	0	62156000	0	0	62156000	0	0	0	0	0
O88543	O88543	1	1	1	COP9 signalosome complex subunit 3	Cops3	sp|O88543|CSN3_MOUSE COP9 signalosome complex subunit 3 OS=Mus musculus OX=10090 GN=Cops3 PE=1 SV=3	1	1	1	1	0	0	1	0	0	0	1	0	0	0	1	0	1.9	1.9	1.9	47.832	423	423	2		1			0.0030277	6.5022	0	0	1.9	0	18095000	0	0	18095000	0	0	0	0	0
O88544	O88544	8	8	8	COP9 signalosome complex subunit 4	Cops4	sp|O88544|CSN4_MOUSE COP9 signalosome complex subunit 4 OS=Mus musculus OX=10090 GN=Cops4 PE=1 SV=1	1	8	8	8	2	0	3	8	2	0	3	8	2	0	3	8	24.9	24.9	24.9	46.284	406	406	2.15		11	2		0	55.812	7.4	0	8.1	24.9	316880000	33459000	0	61459000	221970000	57116000	0	65006000	72987000
O88545	O88545	2	2	2	COP9 signalosome complex subunit 6	Cops6	sp|O88545|CSN6_MOUSE COP9 signalosome complex subunit 6 OS=Mus musculus OX=10090 GN=Cops6 PE=1 SV=1	1	2	2	2	0	1	2	1	0	1	2	1	0	1	2	1	6.8	6.8	6.8	35.88	324	324	3			4		0.0010941	13.055	0	4.6	6.8	4.6	164770000	0	50837000	69146000	44786000	0	0	0	0
O88569	O88569	15	15	15	Heterogeneous nuclear ribonucleoproteins A2/B1	Hnrnpa2b1	sp|O88569|ROA2_MOUSE Heterogeneous nuclear ribonucleoproteins A2/B1 OS=Mus musculus OX=10090 GN=Hnrnpa2b1 PE=1 SV=2	1	15	15	15	6	11	13	11	6	11	13	11	6	11	13	11	42.8	42.8	42.8	37.402	353	353	2.86		17	54	6	0	323.31	21	30.9	32.3	36.8	5004900000	891720000	1104300000	1983900000	1025000000	764650000	464120000	811750000	1050400000
O88587	O88587	2	2	2	Catechol O-methyltransferase	Comt	sp|O88587|COMT_MOUSE Catechol O-methyltransferase OS=Mus musculus OX=10090 GN=Comt PE=1 SV=2	1	2	2	2	0	2	1	0	0	2	1	0	0	2	1	0	9.4	9.4	9.4	29.486	265	265	3			4		0.0010893	12.938	0	9.4	3.4	0	42907000	0	28584000	14323000	0	0	0	0	0
O88602	O88602	1	1	1	Voltage-dependent calcium channel gamma-2 subunit	Cacng2	sp|O88602|CCG2_MOUSE Voltage-dependent calcium channel gamma-2 subunit OS=Mus musculus OX=10090 GN=Cacng2 PE=1 SV=1	1	1	1	1	0	1	1	1	0	1	1	1	0	1	1	1	3.7	3.7	3.7	35.894	323	323	1.8	2	2	1		0.0013774	9.4108	0	3.7	3.7	3.7	36348000	0	18756000	3978000	13615000	0	0	0	0
O88643	O88643	11	11	5	Serine/threonine-protein kinase PAK 1	Pak1	sp|O88643|PAK1_MOUSE Serine/threonine-protein kinase PAK 1 OS=Mus musculus OX=10090 GN=Pak1 PE=1 SV=1	1	11	11	5	2	1	8	9	2	1	8	9	1	0	5	4	22.2	22.2	11	60.736	545	545	2	1	21	1		0	83.927	5.5	2.2	16.3	20.6	834330000	44375000	3308800	347850000	438800000	0	0	140060000	128880000
O88653	O88653	1	1	1	Ragulator complex protein LAMTOR3	Lamtor3	sp|O88653|LTOR3_MOUSE Ragulator complex protein LAMTOR3 OS=Mus musculus OX=10090 GN=Lamtor3 PE=1 SV=1	1	1	1	1	1	1	0	0	1	1	0	0	1	1	0	0	22.6	22.6	22.6	13.553	124	124	4				2	0.0013649	8.0828	22.6	22.6	0	0	69753000	19798000	49955000	0	0	0	0	0	0
O88685	O88685	4	4	4	26S protease regulatory subunit 6A	Psmc3	sp|O88685|PRS6A_MOUSE 26S proteasome regulatory subunit 6A OS=Mus musculus OX=10090 GN=Psmc3 PE=1 SV=2	1	4	4	4	0	0	3	1	0	0	3	1	0	0	3	1	11.3	11.3	11.3	49.548	442	442	2		4			0.00081301	26.507	0	0	7.7	3.6	79667000	0	0	53878000	25789000	0	0	0	0
O88696	O88696	2	2	2	ATP-dependent Clp protease proteolytic subunit, mitochondrial	Clpp	sp|O88696|CLPP_MOUSE ATP-dependent Clp protease proteolytic subunit, mitochondrial OS=Mus musculus OX=10090 GN=Clpp PE=1 SV=1	1	2	2	2	0	2	0	0	0	2	0	0	0	2	0	0	9.6	9.6	9.6	29.8	272	272	3			2		0.0013882	11.06	0	9.6	0	0	42296000	0	42296000	0	0	0	0	0	0
O88703;O88704	O88703;O88704	1;1	1;1	1;1	Potassium/sodium hyperpolarization-activated cyclic nucleotide-gated channel 2;Potassium/sodium hyperpolarization-activated cyclic nucleotide-gated channel 1	Hcn2;Hcn1	sp|O88703|HCN2_MOUSE Potassium/sodium hyperpolarization-activated cyclic nucleotide-gated channel 2 OS=Mus musculus OX=10090 GN=Hcn2 PE=1 SV=1;sp|O88704|HCN1_MOUSE Potassium/sodium hyperpolarization-activated cyclic nucleotide-gated channel 1 OS=Mus muscul	2	1	1	1	0	0	1	1	0	0	1	1	0	0	1	1	1	1	1	94.721	863	863;910	1	2				0.0034217	6.4241	0	0	1	1	12925000	0	0	4243300	8682200	0	0	0	0
O88712;P56546	O88712	10;2	10;2	10;2	C-terminal-binding protein 1	Ctbp1	sp|O88712|CTBP1_MOUSE C-terminal-binding protein 1 OS=Mus musculus OX=10090 GN=Ctbp1 PE=1 SV=2	2	10	10	10	7	3	9	9	7	3	9	9	7	3	9	9	24	24	24	47.744	441	441;445	2.44		20	13	1	0	323.31	17.7	6.8	21.8	19.5	1180000000	255370000	19669000	546650000	358350000	271480000	51778000	163000000	157730000
O88736	O88736	1	1	1	3-keto-steroid reductase	Hsd17b7	sp|O88736|DHB7_MOUSE 3-keto-steroid reductase/17-beta-hydroxysteroid dehydrogenase 7 OS=Mus musculus OX=10090 GN=Hsd17b7 PE=1 SV=1	1	1	1	1	0	1	0	0	0	1	0	0	0	1	0	0	3.6	3.6	3.6	37.316	334	334	3			1		0.0082001	6.2147	0	3.6	0	0	6491000	0	6491000	0	0	0	0	0	0
O88737	O88737	44	44	44	Protein bassoon	Bsn	sp|O88737|BSN_MOUSE Protein bassoon OS=Mus musculus OX=10090 GN=Bsn PE=1 SV=4	1	44	44	44	6	37	19	27	6	37	19	27	6	37	19	27	14.3	14.3	14.3	418.84	3942	3942	1.21	83	13	4		0	323.31	2	12.7	5.5	8.3	2599100000	121050000	1363500000	456800000	657800000	87941000	148690000	124230000	133930000
O88741	O88741	4	4	4	Ganglioside-induced differentiation-associated protein 1	Gdap1	sp|O88741|GDAP1_MOUSE Ganglioside-induced differentiation-associated protein 1 OS=Mus musculus OX=10090 GN=Gdap1 PE=1 SV=1	1	4	4	4	3	0	3	2	3	0	3	2	3	0	3	2	13.4	13.4	13.4	41.31	358	358	2.55		5	6		0	31.348	9.2	0	10.1	6.1	233170000	80602000	0	120700000	31865000	0	0	0	0
O88844	O88844	8	7	7	Isocitrate dehydrogenase [NADP] cytoplasmic	Idh1	sp|O88844|IDHC_MOUSE Isocitrate dehydrogenase [NADP] cytoplasmic OS=Mus musculus OX=10090 GN=Idh1 PE=1 SV=2	1	8	7	7	1	0	5	5	1	0	4	5	1	0	4	5	20.8	18.6	18.6	46.674	414	414	2.1		9	1		0	49.437	2.7	0	12.8	12.6	214500000	10915000	0	87438000	116150000	0	0	0	0
O88851	O88851	2	2	2	Putative hydrolase RBBP9	Rbbp9	sp|O88851|RBBP9_MOUSE Putative hydrolase RBBP9 OS=Mus musculus OX=10090 GN=Rbbp9 PE=1 SV=2	1	2	2	2	0	2	0	0	0	2	0	0	0	2	0	0	16.7	16.7	16.7	20.911	186	186	3			2		0.0013876	11.045	0	16.7	0	0	28604000	0	28604000	0	0	0	0	0	0
O88910	O88910	1	1	1	MAGUK p55 subfamily member 3	Mpp3	sp|O88910|MPP3_MOUSE MAGUK p55 subfamily member 3 OS=Mus musculus OX=10090 GN=Mpp3 PE=1 SV=2	1	1	1	1	0	1	0	0	0	1	0	0	0	1	0	0	3.5	3.5	3.5	64.4	568	568	1	1				0.0030238	6.4938	0	3.5	0	0	8527700	0	8527700	0	0	0	0	0	0
O88935	O88935	31	31	28	Synapsin-1	Syn1	sp|O88935|SYN1_MOUSE Synapsin-1 OS=Mus musculus OX=10090 GN=Syn1 PE=1 SV=2	1	31	31	28	14	30	23	25	14	30	23	25	12	28	20	23	64.2	64.2	60.6	74.096	706	706	1.83	88	83	33	9	0	323.31	29	64	44.3	56.4	40435000000	4269600000	12308000000	11851000000	12007000000	1660900000	1367800000	1375600000	1242800000
O88951	O88951	5	2	2	Protein lin-7 homolog B	Lin7b	sp|O88951|LIN7B_MOUSE Protein lin-7 homolog B OS=Mus musculus OX=10090 GN=Lin7b PE=1 SV=2	1	5	2	2	5	5	5	3	2	2	2	0	2	2	2	0	30.4	12.1	12.1	22.914	207	207	3			6		0.0011628	16.511	30.4	30.4	30.4	18.4	122210000	57417000	29060000	35729000	0	152100000	88861000	0	0
O88952	O88952	7	4	4	Protein lin-7 homolog C	Lin7c	sp|O88952|LIN7C_MOUSE Protein lin-7 homolog C OS=Mus musculus OX=10090 GN=Lin7c PE=1 SV=2	1	7	4	4	5	7	4	3	2	4	1	0	2	4	1	0	48.2	24.9	24.9	21.834	197	197	3			7		0.00081633	26.692	32	48.2	33	23.4	112660000	26040000	70400000	16222000	0	80533000	55997000	0	0
O88958;Q9CRC9	O88958	5;2	5;2	5;2	Glucosamine-6-phosphate isomerase 1	Gnpda1	sp|O88958|GNPI1_MOUSE Glucosamine-6-phosphate isomerase 1 OS=Mus musculus OX=10090 GN=Gnpda1 PE=1 SV=3	2	5	5	5	1	4	2	2	1	4	2	2	1	4	2	2	18.3	18.3	18.3	32.549	289	289;276	3			9		0	30.968	4.2	15.6	6.9	7.6	79469000	5751400	41256000	16210000	16251000	0	44247000	0	40536000
O88983	O88983	2	2	2	Syntaxin-8	Stx8	sp|O88983|STX8_MOUSE Syntaxin-8 OS=Mus musculus OX=10090 GN=Stx8 PE=1 SV=1	1	2	2	2	0	2	1	0	0	2	1	0	0	2	1	0	11	11	11	26.925	236	236	3			3		0.0014091	11.312	0	11	3.4	0	307400000	0	191070000	116340000	0	0	0	0	0
O88998	O88998	4	4	4	Noelin	Olfm1	sp|O88998|NOE1_MOUSE Noelin OS=Mus musculus OX=10090 GN=Olfm1 PE=1 SV=1	1	4	4	4	0	4	1	2	0	4	1	2	0	4	1	2	9.3	9.3	9.3	55.397	485	485	1.25	7		1		0.00078678	25.381	0	9.3	2.3	4.5	122190000	0	73449000	13888000	34857000	0	43151000	0	34058000
O89023	O89023	1	1	1	Tripeptidyl-peptidase 1	Tpp1	sp|O89023|TPP1_MOUSE Tripeptidyl-peptidase 1 OS=Mus musculus OX=10090 GN=Tpp1 PE=1 SV=2	1	1	1	1	1	0	0	1	1	0	0	1	1	0	0	1	2.5	2.5	2.5	61.341	562	562	2.5		1	1		0.0017723	6.8967	2.5	0	0	2.5	96439000	20466000	0	0	75973000	0	0	0	0
O89053	O89053	9	9	9	Coronin-1A	Coro1a	sp|O89053|COR1A_MOUSE Coronin-1A OS=Mus musculus OX=10090 GN=Coro1a PE=1 SV=5	1	9	9	9	5	3	5	7	5	3	5	7	5	3	5	7	18.2	18.2	18.2	50.989	461	461	2.26	5	14	11	1	0	100.97	13.9	8.7	12.1	16.5	1607800000	372620000	107810000	609700000	517650000	382250000	174670000	335700000	322040000
O89084;Q01063	O89084	4;1	4;1	4;1	cAMP-specific 3,5-cyclic phosphodiesterase 4A	Pde4a	sp|O89084|PDE4A_MOUSE cAMP-specific 3,5-cyclic phosphodiesterase 4A OS=Mus musculus OX=10090 GN=Pde4a PE=1 SV=2	2	4	4	4	0	3	0	3	0	3	0	3	0	3	0	3	5.5	5.5	5.5	93.557	844	844;747	1	6				0.00076746	24.72	0	3.9	0	4.3	31647000	0	17171000	0	14476000	0	7156500	0	9476800
O89116	O89116	2	2	2	Vesicle transport through interaction with t-SNAREs homolog 1A	Vti1a	sp|O89116|VTI1A_MOUSE Vesicle transport through interaction with t-SNAREs homolog 1A OS=Mus musculus OX=10090 GN=Vti1a PE=1 SV=1	1	2	2	2	0	2	0	0	0	2	0	0	0	2	0	0	7.8	7.8	7.8	24.986	217	217	3			2		0.00097991	11.634	0	7.8	0	0	7105400	0	7105400	0	0	0	0	0	0
P00158	P00158	1	1	1	Cytochrome b	Mt-Cyb	sp|P00158|CYB_MOUSE Cytochrome b OS=Mus musculus OX=10090 GN=Mt-Cyb PE=1 SV=1	1	1	1	1	0	1	0	1	0	1	0	1	0	1	0	1	2.4	2.4	2.4	43.209	381	381	1.75	2	1	1		0.0050612	6.3495	0	2.4	0	2.4	72719000	0	49799000	0	22920000	0	0	0	0
P00397	P00397	1	1	1	Cytochrome c oxidase subunit 1	Mtco1	sp|P00397|COX1_MOUSE Cytochrome c oxidase subunit 1 OS=Mus musculus OX=10090 GN=Mtco1 PE=1 SV=2	1	1	1	1	0	1	1	1	0	1	1	1	0	1	1	1	2.7	2.7	2.7	56.909	514	514	1.75	2	1	1		0.0013477	7.2653	0	2.7	2.7	2.7	360680000	0	187610000	31745000	141330000	0	0	0	0
P00405	P00405	5	5	5	Cytochrome c oxidase subunit 2	Mtco2	sp|P00405|COX2_MOUSE Cytochrome c oxidase subunit 2 OS=Mus musculus OX=10090 GN=Mtco2 PE=1 SV=1	1	5	5	5	4	5	4	3	4	5	4	3	4	5	4	3	27.8	27.8	27.8	25.976	227	227	3.15	2		29	10	0	135.87	23.3	27.8	23.3	16.3	6050300000	1628700000	3198000000	605490000	618180000	1580900000	2259100000	648580000	926310000
P00416	P00416	1	1	1	Cytochrome c oxidase subunit 3	mt-Co3	sp|P00416|COX3_MOUSE Cytochrome c oxidase subunit 3 OS=Mus musculus OX=10090 GN=mt-Co3 PE=1 SV=2	1	1	1	1	0	1	1	1	0	1	1	1	0	1	1	1	5.4	5.4	5.4	29.922	261	261	2	4	2	2	1	0	38.548	0	5.4	5.4	5.4	878980000	0	347380000	106670000	424930000	0	287560000	0	310780000
P00493	P00493	6	6	6	Hypoxanthine-guanine phosphoribosyltransferase	Hprt1	sp|P00493|HPRT_MOUSE Hypoxanthine-guanine phosphoribosyltransferase OS=Mus musculus OX=10090 GN=Hprt1 PE=1 SV=3	1	6	6	6	3	5	3	2	3	5	3	2	3	5	3	2	33.5	33.5	33.5	24.57	218	218	3			13		0	55.598	18.3	28.9	16.5	10.6	1076100000	221400000	483700000	277290000	93722000	453070000	345960000	372380000	0
P00920	P00920	9	9	9	Carbonic anhydrase 2	Ca2	sp|P00920|CAH2_MOUSE Carbonic anhydrase 2 OS=Mus musculus OX=10090 GN=Ca2 PE=1 SV=4	1	9	9	9	8	8	8	7	8	8	8	7	8	8	8	7	48.1	48.1	48.1	29.032	260	260	3.07			39	3	0	323.31	39.6	39.2	39.2	35.8	5342200000	734470000	1820100000	1876000000	911630000	680970000	1172400000	1099900000	1145300000
P01831	P01831	6	6	6	Thy-1 membrane glycoprotein	Thy1	sp|P01831|THY1_MOUSE Thy-1 membrane glycoprotein OS=Mus musculus OX=10090 GN=Thy1 PE=1 SV=1	1	6	6	6	5	6	6	5	5	6	6	5	5	6	6	5	33.3	33.3	33.3	18.08	162	162	3		4	36	4	0	124.03	32.1	33.3	33.3	24.7	21337000000	5032400000	7350900000	5700400000	3253600000	7606700000	7285000000	5502100000	5815100000
P01942	P01942	6	6	4	Hemoglobin subunit alpha	Hba	sp|P01942|HBA_MOUSE Hemoglobin subunit alpha OS=Mus musculus OX=10090 GN=Hba PE=1 SV=2	1	6	6	4	6	6	6	6	6	6	6	6	4	4	4	4	43	43	36.6	15.085	142	142	3.77		4	6	52	0	323.31	43	43	43	43	51177000000	19243000000	22930000000	4720800000	4282300000	21178000000	14382000000	8641100000	11233000000
P02088;P02089;CON__Q3SX09;P02104;CON__P02070	P02088;P02089	8;4;2;1;1	8;4;2;1;1	8;4;2;1;1	Hemoglobin subunit beta-1;Hemoglobin subunit beta-2	Hbb-b1;Hbb-b2	sp|P02088|HBB1_MOUSE Hemoglobin subunit beta-1 OS=Mus musculus OX=10090 GN=Hbb-b1 PE=1 SV=2;sp|P02089|HBB2_MOUSE Hemoglobin subunit beta-2 OS=Mus musculus OX=10090 GN=Hbb-b2 PE=1 SV=2	5	8	8	8	8	8	7	7	8	8	7	7	8	8	7	7	65.3	65.3	65.3	15.84	147	147;147;201;147;145	3.65	4	3	10	63	0	323.31	65.3	65.3	56.5	64.6	47855000000	17219000000	22005000000	4651300000	3979800000	16384000000	10476000000	6962800000	7535100000
P68433;P84244;P02301;P84228	P68433;P84244;P02301;P84228	3;3;3;3	3;3;3;3	3;3;3;3	Histone H3.1;Histone H3.3;Histone H3.3C;Histone H3.2	Hist1h3a;H3f3a;H3f3c;Hist1h3b	sp|P68433|H31_MOUSE Histone H3.1 OS=Mus musculus OX=10090 GN=H3c1 PE=1 SV=2;sp|P84244|H33_MOUSE Histone H3.3 OS=Mus musculus OX=10090 GN=H3-3a PE=1 SV=2;sp|P02301|H3C_MOUSE Histone H3.3C OS=Mus musculus OX=10090 GN=H3-5 PE=3 SV=3;sp|P84228|H32_MOUSE Histon	4	3	3	3	1	3	3	2	1	3	3	2	1	3	3	2	16.9	16.9	16.9	15.404	136	136;136;136;136	3.12	3	1	4	9	0	323.31	5.1	16.9	16.9	10.3	2319300000	362530000	900090000	760600000	296090000	0	1821600000	1120100000	2394900000
P02468	P02468	5	5	5	Laminin subunit gamma-1	Lamc1	sp|P02468|LAMC1_MOUSE Laminin subunit gamma-1 OS=Mus musculus OX=10090 GN=Lamc1 PE=1 SV=2	1	5	5	5	0	5	1	4	0	5	1	4	0	5	1	4	3.9	3.9	3.9	177.3	1607	1607	1	10				0	30.107	0	3.9	0.7	3	117270000	0	57792000	9685000	49789000	0	15509000	0	23703000
P03888	P03888	3	3	3	NADH-ubiquinone oxidoreductase chain 1	Mtnd1	sp|P03888|NU1M_MOUSE NADH-ubiquinone oxidoreductase chain 1 OS=Mus musculus OX=10090 GN=Mtnd1 PE=1 SV=3	1	3	3	3	0	3	0	2	0	3	0	2	0	3	0	2	5.3	5.3	5.3	36.059	318	318	1.2	4	1			0.0012048	17.411	0	5.3	0	5	107150000	0	75630000	0	31519000	0	0	0	0
P03911	P03911	2	2	2	NADH-ubiquinone oxidoreductase chain 4	Mtnd4	sp|P03911|NU4M_MOUSE NADH-ubiquinone oxidoreductase chain 4 OS=Mus musculus OX=10090 GN=Mtnd4 PE=1 SV=1	1	2	2	2	0	1	2	2	0	1	2	2	0	1	2	2	3.7	3.7	3.7	51.881	459	459	2	3		3		0.0010707	12.529	0	2.2	3.7	3.7	83645000	0	17370000	41071000	25204000	0	0	0	0
P03921	P03921	2	2	2	NADH-ubiquinone oxidoreductase chain 5	Mtnd5	sp|P03921|NU5M_MOUSE NADH-ubiquinone oxidoreductase chain 5 OS=Mus musculus OX=10090 GN=Mtnd5 PE=1 SV=3	1	2	2	2	0	1	0	1	0	1	0	1	0	1	0	1	5.4	5.4	5.4	68.474	607	607	1.5	1	1			0.0010499	12.333	0	2.1	0	3.3	83630000	0	11344000	0	72286000	0	0	0	0
P03930	P03930	2	2	2	ATP synthase protein 8	Mtatp8	sp|P03930|ATP8_MOUSE ATP synthase protein 8 OS=Mus musculus OX=10090 GN=Mtatp8 PE=1 SV=1	1	2	2	2	2	2	2	2	2	2	2	2	2	2	2	2	34.3	34.3	34.3	7.7662	67	67	4				8	0	278.19	34.3	34.3	34.3	34.3	1415500000	610630000	496460000	141790000	166640000	1902100000	758850000	637320000	929530000
P03995	P03995	18	18	18	Glial fibrillary acidic protein	Gfap	sp|P03995|GFAP_MOUSE Glial fibrillary acidic protein OS=Mus musculus OX=10090 GN=Gfap PE=1 SV=4	1	18	18	18	4	0	17	12	4	0	17	12	4	0	17	12	42.3	42.3	42.3	49.899	430	430	2.11		34	4		0	256.68	10	0	40.5	30	1814400000	54261000	0	1293700000	466370000	61237000	0	249560000	84644000
P04104	P04104	10	2	2	Keratin, type II cytoskeletal 1	Krt1	sp|P04104|K2C1_MOUSE Keratin, type II cytoskeletal 1 OS=Mus musculus OX=10090 GN=Krt1 PE=1 SV=4	1	10	2	2	5	9	8	7	0	1	0	1	0	1	0	1	9.4	3	3	65.605	637	637	1.33	2	1			0.0013999	11.229	5.2	8	6.4	6.8	15640000	0	15640000	0	0	0	0	0	0
P04117	P04117	1	1	1	Fatty acid-binding protein, adipocyte	Fabp4	sp|P04117|FABP4_MOUSE Fatty acid-binding protein, adipocyte OS=Mus musculus OX=10090 GN=Fabp4 PE=1 SV=3	1	1	1	1	1	0	0	0	1	0	0	0	1	0	0	0	6.8	6.8	6.8	14.65	132	132	4				1	0.0013599	7.6318	6.8	0	0	0	7447000	7447000	0	0	0	0	0	0	0
P04370	P04370	7	7	7	Myelin basic protein	Mbp	sp|P04370|MBP_MOUSE Myelin basic protein OS=Mus musculus OX=10090 GN=Mbp PE=1 SV=2	1	7	7	7	4	7	5	6	4	7	5	6	4	7	5	6	21.2	21.2	21.2	27.167	250	250	3.44	6	6	21	58	0	323.31	14.4	21.2	18.4	19.2	35313000000	2299500000	22532000000	4178800000	6303300000	2704800000	10503000000	3167800000	10305000000
P04627;P28028;Q99N57	P04627;P28028	3;2;1	3;2;1	3;2;1	Serine/threonine-protein kinase A-Raf;Serine/threonine-protein kinase B-raf	Araf;Braf	sp|P04627|ARAF_MOUSE Serine/threonine-protein kinase A-Raf OS=Mus musculus OX=10090 GN=Araf PE=1 SV=2;sp|P28028|BRAF_MOUSE Serine/threonine-protein kinase B-raf OS=Mus musculus OX=10090 GN=Braf PE=1 SV=4	3	3	3	3	0	1	1	1	0	1	1	1	0	1	1	1	5	5	5	67.581	604	604;751;648	1.67	2		1		0.0011751	16.981	0	1.8	1.5	1.7	23767000	0	6484400	3019200	14264000	0	0	0	0
P04925	P04925	3	3	3	Major prion protein	Prnp	sp|P04925|PRIO_MOUSE Major prion protein OS=Mus musculus OX=10090 GN=Prnp PE=1 SV=2	1	3	3	3	0	3	2	1	0	3	2	1	0	3	2	1	12.2	12.2	12.2	27.977	254	254	3			6		0.0012979	18.675	0	12.2	8.7	4.7	147850000	0	71403000	45057000	31393000	0	0	0	0
P05063	P05063	22	19	19	Fructose-bisphosphate aldolase C	Aldoc	sp|P05063|ALDOC_MOUSE Fructose-bisphosphate aldolase C OS=Mus musculus OX=10090 GN=Aldoc PE=1 SV=4	1	22	19	19	14	15	17	20	12	13	15	17	12	13	15	17	68	59.2	59.2	39.394	363	363	2.49	5	60	28	15	0	323.31	43	50.1	50.4	66.1	10396000000	1445400000	621070000	4605600000	3724200000	596420000	622570000	537210000	677130000
P05064;Q91Y97	P05064	25;1	25;1	22;0	Fructose-bisphosphate aldolase A	Aldoa	sp|P05064|ALDOA_MOUSE Fructose-bisphosphate aldolase A OS=Mus musculus OX=10090 GN=Aldoa PE=1 SV=2	2	25	25	22	11	18	20	21	11	18	20	21	9	16	18	18	69.2	69.2	60.4	39.355	364	364;364	2.34	19	92	47	16	0	323.31	43.4	50.8	62.6	62.6	42716000000	9626000000	2543200000	14883000000	15664000000	4417400000	4423300000	4851400000	4378300000
P05201	P05201	20	20	20	Aspartate aminotransferase, cytoplasmic	Got1	sp|P05201|AATC_MOUSE Aspartate aminotransferase, cytoplasmic OS=Mus musculus OX=10090 GN=Got1 PE=1 SV=3	1	20	20	20	13	17	18	18	13	17	18	18	13	17	18	18	56.9	56.9	56.9	46.247	413	413	2.66	3	66	54	23	0	323.31	32.7	46	51.1	52.1	14344000000	2588300000	1392500000	4894800000	5468300000	1325000000	899580000	990210000	936570000
P05202	P05202	20	20	20	Aspartate aminotransferase, mitochondrial	Got2	sp|P05202|AATM_MOUSE Aspartate aminotransferase, mitochondrial OS=Mus musculus OX=10090 GN=Got2 PE=1 SV=1	1	20	20	20	18	17	19	19	18	17	19	19	18	17	19	19	40.5	40.5	40.5	47.411	430	430	2.62	17	78	78	34	0	323.31	34.9	38.4	40.5	40.5	22206000000	5446800000	3016300000	6309000000	7433500000	3078700000	1661600000	1490400000	1702500000
P05213	P05213	25	2	0	Tubulin alpha-1B chain	Tuba1b	sp|P05213|TBA1B_MOUSE Tubulin alpha-1B chain OS=Mus musculus OX=10090 GN=Tuba1b PE=1 SV=2	1	25	2	0	20	20	21	24	2	2	2	2	0	0	0	0	61	6	0	50.151	451	451	2.23	5	22	10	2	0	61.059	48.6	52.1	53.4	60.8	9970600000	393140000	1266000000	3723500000	4588100000	546440000	3770400000	1993700000	3378400000
P05480;P16056;Q62190;Q922K9;Q62270	P05480	7;1;1;1;1	7;1;1;1;1	5;1;1;1;1	Neuronal proto-oncogene tyrosine-protein kinase Src	Src	sp|P05480|SRC_MOUSE Neuronal proto-oncogene tyrosine-protein kinase Src OS=Mus musculus OX=10090 GN=Src PE=1 SV=5	5	7	7	5	0	0	4	6	0	0	4	6	0	0	2	4	12.9	12.9	9.5	59.89	535	535;1379;1378;512;496	2		10			0	42.611	0	0	7.3	11.2	167210000	0	0	78249000	88960000	0	0	41476000	35448000
P05977;P09542	P05977;P09542	1;1	1;1	1;1	Myosin light chain 1/3, skeletal muscle isoform;Myosin light chain 3	Myl1;Myl3	sp|P05977|MYL1_MOUSE Myosin light chain 1/3, skeletal muscle isoform OS=Mus musculus OX=10090 GN=Myl1 PE=1 SV=2;sp|P09542|MYL3_MOUSE Myosin light chain 3 OS=Mus musculus OX=10090 GN=Myl3 PE=1 SV=4	2	1	1	1	1	1	0	0	1	1	0	0	1	1	0	0	8.5	8.5	8.5	20.594	188	188;204	4				2	0.001773	6.8972	8.5	8.5	0	0	40052000	12818000	27235000	0	0	0	0	0	0
P06151;P00342	P06151	20;2	20;2	19;1	L-lactate dehydrogenase A chain	Ldha	sp|P06151|LDHA_MOUSE L-lactate dehydrogenase A chain OS=Mus musculus OX=10090 GN=Ldha PE=1 SV=3	2	20	20	19	9	16	17	13	9	16	17	13	9	15	16	13	48.2	48.2	44.6	36.498	332	332;332	2.83	8	10	67	10	0	283.75	29.5	44.6	46.7	42.2	14567000000	1718400000	5572100000	4975700000	2301200000	924880000	2318100000	1921400000	1710200000
P06745;CON__Q3ZBD7	P06745	16;7	16;7	16;7	Glucose-6-phosphate isomerase	Gpi	sp|P06745|G6PI_MOUSE Glucose-6-phosphate isomerase OS=Mus musculus OX=10090 GN=Gpi PE=1 SV=4	2	16	16	16	8	10	13	16	8	10	13	16	8	10	13	16	40.3	40.3	40.3	62.766	558	558;557	2.29	5	66	26	4	0	274.04	15.6	22.8	30.3	40.3	12470000000	985590000	414940000	5339500000	5730400000	778670000	888460000	953600000	973270000
P21447;P06795	P21447;P06795	1;1	1;1	1;1	Multidrug resistance protein 1A;Multidrug resistance protein 1B	Abcb1a;Abcb1b	sp|P21447|MDR1A_MOUSE ATP-dependent translocase ABCB1 OS=Mus musculus OX=10090 GN=Abcb1a PE=1 SV=3;sp|P06795|MDR1B_MOUSE ATP-dependent translocase ABCB1 OS=Mus musculus OX=10090 GN=Abcb1b PE=1 SV=1	2	1	1	1	0	1	0	0	0	1	0	0	0	1	0	0	0.8	0.8	0.8	140.64	1276	1276;1276	1	1				0.0042409	6.3761	0	0.8	0	0	5886600	0	5886600	0	0	0	0	0	0
P06801	P06801	7	7	7	NADP-dependent malic enzyme	Me1	sp|P06801|MAOX_MOUSE NADP-dependent malic enzyme OS=Mus musculus OX=10090 GN=Me1 PE=1 SV=2	1	7	7	7	0	2	3	4	0	2	3	4	0	2	3	4	14	14	14	63.953	572	572	2.22		7	2		0	43.598	0	3.1	6.1	7.7	95184000	0	5193900	37258000	52732000	0	0	0	0
P06837	P06837	5	5	5	Neuromodulin	Gap43	sp|P06837|NEUM_MOUSE Neuromodulin OS=Mus musculus OX=10090 GN=Gap43 PE=1 SV=1	1	5	5	5	1	1	3	3	1	1	3	3	1	1	3	3	33	33	33	23.632	227	227	2.25		7		1	0	124.46	7.5	6.2	25.1	25.1	1247000000	56805000	3631100	770960000	415580000	0	0	888490000	395660000
P07309	P07309	4	4	4	Transthyretin	Ttr	sp|P07309|TTHY_MOUSE Transthyretin OS=Mus musculus OX=10090 GN=Ttr PE=1 SV=1	1	4	4	4	3	3	1	0	3	3	1	0	3	3	1	0	30.6	30.6	30.6	15.776	147	147	4				7	0.00079554	25.818	25.9	23.8	10.2	0	168850000	61112000	95253000	12482000	0	131710000	96077000	0	0
P07356	P07356	6	6	6	Annexin A2	Anxa2	sp|P07356|ANXA2_MOUSE Annexin A2 OS=Mus musculus OX=10090 GN=Anxa2 PE=1 SV=2	1	6	6	6	0	5	2	1	0	5	2	1	0	5	2	1	23	23	23	38.676	339	339	2	4		4		0	36.855	0	18.3	5.6	4.7	120850000	0	89923000	22898000	8026300	0	29687000	41606000	0
P07724	P07724	12	12	11	Serum albumin	Alb	sp|P07724|ALBU_MOUSE Albumin OS=Mus musculus OX=10090 GN=Alb PE=1 SV=3	1	12	12	11	8	10	8	11	8	10	8	11	8	10	8	10	20.1	20.1	18.6	68.692	608	608	2.14	10	39	13	3	0	123.02	16.9	18.6	13.8	19.9	3952400000	972920000	586950000	859840000	1532700000	893450000	766600000	320730000	479720000
P07759	P07759	1	1	1	Serine protease inhibitor A3K	Serpina3k	sp|P07759|SPA3K_MOUSE Serine protease inhibitor A3K OS=Mus musculus OX=10090 GN=Serpina3k PE=1 SV=2	1	1	1	1	0	1	0	0	0	1	0	0	0	1	0	0	5.5	5.5	5.5	46.879	418	418	2		1			0.0021959	6.7229	0	5.5	0	0	6770800	0	6770800	0	0	0	0	0	0
P07901	P07901	35	19	19	Heat shock protein HSP 90-alpha	Hsp90aa1	sp|P07901|HS90A_MOUSE Heat shock protein HSP 90-alpha OS=Mus musculus OX=10090 GN=Hsp90aa1 PE=1 SV=4	1	35	19	19	17	34	25	28	9	19	15	16	9	19	15	16	36	20.6	20.6	84.787	733	733	1.65	64	26	15	5	0	323.31	23.9	36	28.4	30.4	8660500000	520390000	3966800000	1464700000	2708700000	400260000	638850000	479410000	517880000
P08003	P08003	2	2	2	Protein disulfide-isomerase A4	Pdia4	sp|P08003|PDIA4_MOUSE Protein disulfide-isomerase A4 OS=Mus musculus OX=10090 GN=Pdia4 PE=1 SV=3	1	2	2	2	0	1	1	2	0	1	1	2	0	1	1	2	3.9	3.9	3.9	71.982	638	638	1.75	1	3			0.0014437	11.522	0	1.6	1.6	3.9	42464000	0	13160000	9954100	19350000	0	0	0	0
P08113	P08113	17	15	15	Endoplasmin	Hsp90b1	sp|P08113|ENPL_MOUSE Endoplasmin OS=Mus musculus OX=10090 GN=Hsp90b1 PE=1 SV=2	1	17	15	15	6	16	11	13	4	14	9	11	4	14	9	11	21.9	20.2	20.2	92.475	802	802	1.4	35	10	5		0	102.72	7	20.6	14.7	16.6	1662900000	55245000	752620000	312880000	542210000	49278000	138330000	138040000	135740000
P08122	P08122	3	3	3	Collagen alpha-2(IV) chain;Canstatin	Col4a2	sp|P08122|CO4A2_MOUSE Collagen alpha-2(IV) chain OS=Mus musculus OX=10090 GN=Col4a2 PE=1 SV=4	1	3	3	3	0	2	1	3	0	2	1	3	0	2	1	3	2.1	2.1	2.1	167.32	1707	1707	1	6				0.0013201	18.925	0	1.5	0.8	2.1	148050000	0	40113000	14756000	93177000	0	21620000	0	58094000
P08226	P08226	11	11	11	Apolipoprotein E	Apoe	sp|P08226|APOE_MOUSE Apolipoprotein E OS=Mus musculus OX=10090 GN=Apoe PE=1 SV=2	1	11	11	11	5	8	7	7	5	8	7	7	5	8	7	7	38.3	38.3	38.3	35.866	311	311	3			28		0	110.67	17.4	26.4	21.9	20.9	1059100000	138770000	475560000	278280000	166490000	164190000	287710000	145490000	190770000
P08228	P08228	5	5	5	Superoxide dismutase [Cu-Zn]	Sod1	sp|P08228|SODC_MOUSE Superoxide dismutase [Cu-Zn] OS=Mus musculus OX=10090 GN=Sod1 PE=1 SV=2	1	5	5	5	4	5	4	4	4	5	4	4	4	5	4	4	39	39	39	15.942	154	154	3.86		1	2	26	0	160.33	32.5	39	32.5	32.5	7160900000	1667400000	2947100000	1735400000	811090000	2724100000	3040700000	3010600000	2860000000
P08249	P08249	15	15	15	Malate dehydrogenase, mitochondrial	Mdh2	sp|P08249|MDHM_MOUSE Malate dehydrogenase, mitochondrial OS=Mus musculus OX=10090 GN=Mdh2 PE=1 SV=3	1	15	15	15	11	14	12	14	11	14	12	14	11	14	12	14	56.8	56.8	56.8	35.611	338	338	2.88	15	37	90	45	0	323.31	42	53	47	53	53159000000	6432900000	16815000000	18702000000	11208000000	3384500000	8985700000	9212400000	10483000000
P08414;P58801	P08414	4;1	4;1	4;1	Calcium/calmodulin-dependent protein kinase type IV	Camk4	sp|P08414|KCC4_MOUSE Calcium/calmodulin-dependent protein kinase type IV OS=Mus musculus OX=10090 GN=Camk4 PE=1 SV=2	2	4	4	4	1	0	2	3	1	0	2	3	1	0	2	3	10.7	10.7	10.7	52.627	469	469;539	2.17		5	1		0.00071736	22.694	4.1	0	5.8	6.6	132530000	26680000	0	46832000	59021000	0	0	0	0
P08551	P08551	19	15	15	Neurofilament light polypeptide	Nefl	sp|P08551|NFL_MOUSE Neurofilament light polypeptide OS=Mus musculus OX=10090 GN=Nefl PE=1 SV=5	1	19	15	15	3	11	9	18	2	7	6	15	2	7	6	15	36.6	31.3	31.3	61.508	543	543	1.92	7	28	4		0	135.33	4.6	17.9	14.7	36.5	1763300000	20585000	266890000	273210000	1202600000	22464000	57582000	84854000	331030000
P08553	P08553	23	23	18	Neurofilament medium polypeptide	Nefm	sp|P08553|NFM_MOUSE Neurofilament medium polypeptide OS=Mus musculus OX=10090 GN=Nefm PE=1 SV=4	1	23	23	18	2	21	11	17	2	21	11	17	1	16	8	14	27.5	27.5	24.1	95.915	848	848	1.29	50	16	2		0	308.25	2.2	25.1	13.1	21.5	3737900000	66355000	1783400000	474330000	1413900000	103560000	473870000	290390000	497280000
P08556	P08556	6	6	1	GTPase NRas	Nras	sp|P08556|RASN_MOUSE GTPase NRas OS=Mus musculus OX=10090 GN=Nras PE=1 SV=1	1	6	6	1	4	6	2	2	4	6	2	2	0	1	0	0	45	45	4.8	21.199	189	189	3.52			10	11	0	52.972	26.5	45	12.2	12.2	873450000	234300000	444820000	93582000	100750000	414350000	301670000	328860000	422910000
P08752	P08752	6	3	3	Guanine nucleotide-binding protein G(i) subunit alpha-2	Gnai2	sp|P08752|GNAI2_MOUSE Guanine nucleotide-binding protein G(i) subunit alpha-2 OS=Mus musculus OX=10090 GN=Gnai2 PE=1 SV=5	1	6	3	3	6	4	6	6	3	1	3	3	3	1	3	3	20	11.3	11.3	40.489	355	355	2.5		6	6		0.00076511	24.629	20	13	20	20	510120000	65034000	27990000	245500000	171590000	164000000	0	165390000	160900000
P09103	P09103	9	9	9	Protein disulfide-isomerase	P4hb	sp|P09103|PDIA1_MOUSE Protein disulfide-isomerase OS=Mus musculus OX=10090 GN=P4hb PE=1 SV=2	1	9	9	9	0	0	3	9	0	0	3	9	0	0	3	9	20	20	20	57.058	509	509	2		12			0	55.925	0	0	6.7	20	290060000	0	0	79786000	210280000	0	0	32109000	56745000
P09405	P09405	11	11	11	Nucleolin	Ncl	sp|P09405|NUCL_MOUSE Nucleolin OS=Mus musculus OX=10090 GN=Ncl PE=1 SV=2	1	11	11	11	0	8	6	9	0	8	6	9	0	8	6	9	16.3	16.3	16.3	76.722	707	707	1.29	20	8			0	70.407	0	13.7	8.1	13.4	678090000	0	308640000	90509000	278940000	0	55219000	47750000	69534000
P09411;P09041	P09411	20;4	20;4	20;4	Phosphoglycerate kinase 1	Pgk1	sp|P09411|PGK1_MOUSE Phosphoglycerate kinase 1 OS=Mus musculus OX=10090 GN=Pgk1 PE=1 SV=4	2	20	20	20	12	8	13	15	12	8	13	15	12	8	13	15	54.2	54.2	54.2	44.55	417	417;417	2.37	6	49	31	4	0	323.31	33.8	26.1	31.9	40.3	11686000000	2772700000	1163400000	3498400000	4251600000	1616800000	1415700000	1189100000	1307000000
P09528	P09528	7	7	7	Ferritin heavy chain;Ferritin heavy chain, N-terminally processed	Fth1	sp|P09528|FRIH_MOUSE Ferritin heavy chain OS=Mus musculus OX=10090 GN=Fth1 PE=1 SV=2	1	7	7	7	4	7	4	4	4	7	4	4	4	7	4	4	35.7	35.7	35.7	21.066	182	182	3.18	6		9	18	0	87.849	22.5	35.7	23.6	24.2	1302800000	278400000	683380000	190070000	150970000	356380000	294570000	439330000	403280000
P09541	P09541	1	1	1	Myosin light chain 4	Myl4	sp|P09541|MYL4_MOUSE Myosin light chain 4 OS=Mus musculus OX=10090 GN=Myl4 PE=1 SV=3	1	1	1	1	0	0	0	1	0	0	0	1	0	0	0	1	8.3	8.3	8.3	21.159	193	193	4				1	0.001363	7.7944	0	0	0	8.3	639800	0	0	0	639800	0	0	0	0
P09671	P09671	8	8	8	Superoxide dismutase [Mn], mitochondrial	Sod2	sp|P09671|SODM_MOUSE Superoxide dismutase [Mn], mitochondrial OS=Mus musculus OX=10090 GN=Sod2 PE=1 SV=3	1	8	8	8	7	8	5	6	7	8	5	6	7	8	5	6	38.7	38.7	38.7	24.603	222	222	3.26			34	12	0	323.31	35.1	38.7	20.3	26.6	5529100000	1623300000	2350700000	886390000	668680000	1858200000	2044900000	1027500000	1063200000
P0C028;P0C027	P0C028;P0C027	2;2	2;2	1;1	Diphosphoinositol polyphosphate phosphohydrolase 3-beta;Diphosphoinositol polyphosphate phosphohydrolase 3-alpha	Nudt11;Nudt10	sp|P0C028|NUD11_MOUSE Diphosphoinositol polyphosphate phosphohydrolase 3-beta OS=Mus musculus OX=10090 GN=Nudt11 PE=1 SV=1;sp|P0C027|NUD10_MOUSE Diphosphoinositol polyphosphate phosphohydrolase 3-alpha OS=Mus musculus OX=10090 GN=Nudt10 PE=1 SV=1	2	2	2	1	0	1	1	0	0	1	1	0	0	1	0	0	14	14	8.5	18.593	164	164;164	3			2		0.0011416	14.566	0	8.5	5.5	0	30784000	0	23182000	7602600	0	0	0	0	0
P0C0A3	P0C0A3	1	1	1	Charged multivesicular body protein 6	Chmp6	sp|P0C0A3|CHMP6_MOUSE Charged multivesicular body protein 6 OS=Mus musculus OX=10090 GN=Chmp6 PE=1 SV=2	1	1	1	1	0	1	0	0	0	1	0	0	0	1	0	0	6.5	6.5	6.5	23.415	200	200	3			1		0.0042463	6.3824	0	6.5	0	0	24347000	0	24347000	0	0	0	0	0	0
Q3THW5;P0C0S6	Q3THW5;P0C0S6	4;4	2;2	2;2	Histone H2A.V;Histone H2A.Z	H2afv;H2afz	sp|Q3THW5|H2AV_MOUSE Histone H2A.V OS=Mus musculus OX=10090 GN=H2az2 PE=1 SV=3;sp|P0C0S6|H2AZ_MOUSE Histone H2A.Z OS=Mus musculus OX=10090 GN=H2az1 PE=1 SV=2	2	4	2	2	4	4	4	3	2	2	2	1	2	2	2	1	31.2	18.8	18.8	13.509	128	128;128	4				7	0.0014045	21.177	31.2	31.2	31.2	20.3	263690000	93277000	113820000	29726000	26874000	229320000	147600000	0	0
P0C192	P0C192	2	2	2	Leucine-rich repeat-containing protein 4B	Lrrc4b	sp|P0C192|LRC4B_MOUSE Leucine-rich repeat-containing protein 4B OS=Mus musculus OX=10090 GN=Lrrc4b PE=1 SV=1	1	2	2	2	0	1	0	1	0	1	0	1	0	1	0	1	3.8	3.8	3.8	76.155	709	709	1	2				0.0010081	11.886	0	2	0	1.8	22020000	0	14011000	0	8009200	0	0	0	0
P0C1Q2	P0C1Q2	1	1	1	Dual 3,5-cyclic-AMP and -GMP phosphodiesterase 11A	Pde11a	sp|P0C1Q2|PDE11_MOUSE Dual 3,5-cyclic-AMP and -GMP phosphodiesterase 11A OS=Mus musculus OX=10090 GN=Pde11a PE=1 SV=1	1	1	1	1	1	0	0	0	1	0	0	0	1	0	0	0	0.9	0.9	0.9	104.56	933	933	4				1	1	-2	0.9	0	0	0	0	0	0	0	0	0	0	0	0
P0CG50;P0CG49;P62983;P62984	P0CG50;P0CG49;P62983;P62984	4;4;4;4	4;4;4;4	4;4;4;4	Polyubiquitin-C;Ubiquitin;Ubiquitin-related 1;Ubiquitin-related 2;Polyubiquitin-B;Ubiquitin;Ubiquitin-40S ribosomal protein S27a;Ubiquitin;40S ribosomal protein S27a;Ubiquitin-60S ribosomal protein L40;Ubiquitin;60S ribosomal protein L40	Ubc;Ubb;Rps27a;Uba52	sp|P0CG50|UBC_MOUSE Polyubiquitin-C OS=Mus musculus OX=10090 GN=Ubc PE=1 SV=2;sp|P0CG49|UBB_MOUSE Polyubiquitin-B OS=Mus musculus OX=10090 GN=Ubb PE=2 SV=1;sp|P62983|RS27A_MOUSE Ubiquitin-40S ribosomal protein S27a OS=Mus musculus OX=10090 GN=Rps27a PE=1 S	4	4	4	4	4	4	4	4	4	4	4	4	4	4	4	4	57.6	57.6	57.6	82.549	734	734;305;156;128	2.5	21	12	15	20	0	70.714	57.6	57.6	57.6	57.6	8293900000	1365900000	2958700000	1817600000	2151800000	1387800000	1053200000	1922300000	1262000000
P0DN34	P0DN34	2	2	2			sp|P0DN34|NDUB1_MOUSE NADH dehydrogenase [ubiquinone] 1 beta subcomplex subunit 1 OS=Mus musculus OX=10090 GN=Ndufb1 PE=1 SV=1	1	2	2	2	2	0	0	0	2	0	0	0	2	0	0	0	31.6	31.6	31.6	6.954	57	57	4				2	0.0011662	16.67	31.6	0	0	0	73098000	73098000	0	0	0	0	0	0	0
P0DP28;P0DP27;P0DP26;Q9D6P8;P20801	P0DP28;P0DP27;P0DP26;Q9D6P8	11;11;11;6;1	11;11;11;6;1	11;11;11;6;1	Calmodulin-like protein 3	Calml3	sp|P0DP28|CALM3_MOUSE Calmodulin-3 OS=Mus musculus OX=10090 GN=Calm3 PE=1 SV=1;sp|P0DP27|CALM2_MOUSE Calmodulin-2 OS=Mus musculus OX=10090 GN=Calm2 PE=1 SV=1;sp|P0DP26|CALM1_MOUSE Calmodulin-1 OS=Mus musculus OX=10090 GN=Calm1 PE=1 SV=1;sp|Q9D6P8|CALL3_MOU	5	11	11	11	8	10	3	6	8	10	3	6	8	10	3	6	60.4	60.4	60.4	16.837	149	149;149;149;149;160	3.8			9	37	0	225.03	59.1	45.6	30.9	40.9	14156000000	5148000000	6129800000	1401900000	1476000000	5143100000	3358000000	2717500000	3325500000
P10126	P10126	11	11	4	Elongation factor 1-alpha 1	Eef1a1	sp|P10126|EF1A1_MOUSE Elongation factor 1-alpha 1 OS=Mus musculus OX=10090 GN=Eef1a1 PE=1 SV=3	1	11	11	4	7	9	11	10	7	9	11	10	2	2	4	3	27.5	27.5	11.7	50.113	462	462	2.34	24	37	28	16	0	323.31	18.6	23.6	27.5	26	10979000000	2153800000	1731400000	3366800000	3726600000	1113000000	1034900000	902170000	998960000
P10493	P10493	1	1	1	Nidogen-1	Nid1	sp|P10493|NID1_MOUSE Nidogen-1 OS=Mus musculus OX=10090 GN=Nid1 PE=1 SV=2	1	1	1	1	0	1	0	1	0	1	0	1	0	1	0	1	1	1	1	136.54	1245	1245	1	2				0.0042481	6.3824	0	1	0	1	14328000	0	6638400	0	7689300	0	0	0	0
P10518	P10518	2	2	2	Delta-aminolevulinic acid dehydratase	Alad	sp|P10518|HEM2_MOUSE Delta-aminolevulinic acid dehydratase OS=Mus musculus OX=10090 GN=Alad PE=1 SV=1	1	2	2	2	1	2	1	1	1	2	1	1	1	2	1	1	5.5	5.5	5.5	36.023	330	330	3			5		0.0010935	13.046	3	5.5	3	3	72964000	10861000	18344000	26655000	17104000	0	0	0	0
P10605	P10605	4	4	4	Cathepsin B;Cathepsin B light chain;Cathepsin B heavy chain	Ctsb	sp|P10605|CATB_MOUSE Cathepsin B OS=Mus musculus OX=10090 GN=Ctsb PE=1 SV=2	1	4	4	4	3	4	2	1	3	4	2	1	3	4	2	1	15.6	15.6	15.6	37.279	339	339	3			12		0	51.976	10.3	15.6	6.5	4.1	507420000	120360000	234730000	111600000	40732000	158040000	232740000	158770000	0
P10630	P10630	15	15	8	Eukaryotic initiation factor 4A-II;Eukaryotic initiation factor 4A-II, N-terminally processed	Eif4a2	sp|P10630|IF4A2_MOUSE Eukaryotic initiation factor 4A-II OS=Mus musculus OX=10090 GN=Eif4a2 PE=1 SV=2	1	15	15	8	3	6	13	13	3	6	13	13	2	2	7	7	40.5	40.5	18.7	46.402	407	407	2.08	2	32	5		0	155.58	8.6	20.9	33.9	38.3	1988600000	102260000	108720000	815260000	962410000	165850000	229970000	244740000	275640000
P10637	P10637	11	11	11	Microtubule-associated protein tau	Mapt	sp|P10637|TAU_MOUSE Microtubule-associated protein tau OS=Mus musculus OX=10090 GN=Mapt PE=1 SV=3	1	11	11	11	7	7	11	10	7	7	11	10	7	7	11	10	14.6	14.6	14.6	76.243	733	733	2.17	2	39	11		0	323.31	9.5	9.5	14.6	13.2	4285000000	358360000	149900000	2200500000	1576200000	577410000	283430000	386600000	420870000
P10639	P10639	2	2	2	Thioredoxin	Txn	sp|P10639|THIO_MOUSE Thioredoxin OS=Mus musculus OX=10090 GN=Txn PE=1 SV=3	1	2	2	2	2	2	1	1	2	2	1	1	2	2	1	1	21	21	21	11.675	105	105	4				7	0	133.65	21	21	12.4	12.4	770810000	238680000	365670000	81263000	85188000	729860000	542180000	0	0
P10649;P19639;O35660	P10649	13;3;1	13;3;1	9;1;0	Glutathione S-transferase Mu 1	Gstm1	sp|P10649|GSTM1_MOUSE Glutathione S-transferase Mu 1 OS=Mus musculus OX=10090 GN=Gstm1 PE=1 SV=2	3	13	13	9	7	13	13	11	7	13	13	11	5	9	9	8	53.2	53.2	33.9	25.97	218	218;218;218	3.12		1	59	9	0	323.31	36.2	53.2	53.2	49.5	10317000000	1593100000	3682600000	3364600000	1676800000	2330200000	2154100000	1676400000	1917800000
P62071;P10833	P62071;P10833	1;1	1;1	1;1	Ras-related protein R-Ras2;Ras-related protein R-Ras	Rras2;Rras	sp|P62071|RRAS2_MOUSE Ras-related protein R-Ras2 OS=Mus musculus OX=10090 GN=Rras2 PE=1 SV=1;sp|P10833|RRAS_MOUSE Ras-related protein R-Ras OS=Mus musculus OX=10090 GN=Rras PE=1 SV=1	2	1	1	1	0	1	1	1	0	1	1	1	0	1	1	1	5.4	5.4	5.4	23.399	204	204;218	3			3		0.0017621	6.7845	0	5.4	5.4	5.4	45101000	0	22673000	14528000	7900100	0	0	0	0
P10852	P10852	12	12	12	4F2 cell-surface antigen heavy chain	Slc3a2	sp|P10852|4F2_MOUSE 4F2 cell-surface antigen heavy chain OS=Mus musculus OX=10090 GN=Slc3a2 PE=1 SV=1	1	12	12	12	5	10	8	10	5	10	8	10	5	10	8	10	25.5	25.5	25.5	58.336	526	526	1.67	33	15	6	4	0	89.8	10.3	20.5	15.4	21.3	2006400000	217390000	776880000	254140000	758010000	204640000	219720000	141490000	202110000
Q6ZWY9;Q64478;P10853;P10854;Q64475;Q64525;Q8CGP2;Q8CGP1;P70696	Q6ZWY9;Q64478;P10853;P10854;Q64475;Q64525;Q8CGP2;Q8CGP1	4;4;4;4;4;4;4;4;1	4;4;4;4;4;4;4;4;1	2;2;2;2;2;2;2;2;0	Histone H2B type 1-C/E/G;Histone H2B type 1-H;Histone H2B type 1-F/J/L;Histone H2B type 1-M;Histone H2B type 1-B;Histone H2B type 2-B;Histone H2B type 1-P;Histone H2B type 1-K	Hist1h2bc;Hist1h2bh;Hist1h2bf;Hist1h2bm;Hist1h2bb;Hist2h2bb;Hist1h2bp;Hist1h2bk	sp|Q6ZWY9|H2B1C_MOUSE Histone H2B type 1-C/E/G OS=Mus musculus OX=10090 GN=H2bc4 PE=1 SV=3;sp|Q64478|H2B1H_MOUSE Histone H2B type 1-H OS=Mus musculus OX=10090 GN=H2bc9 PE=1 SV=3;sp|P10853|H2B1F_MOUSE Histone H2B type 1-F/J/L OS=Mus musculus OX=10090 GN=H2b	9	4	4	2	4	4	4	4	4	4	4	4	2	2	2	2	27	27	7.9	13.906	126	126;126;126;126;126;126;126;126;127	3.46	3	2	8	26	0	59.137	27	27	27	27	11800000000	4076800000	4844200000	1153500000	1725900000	6140500000	5391900000	3237600000	7257900000
P10922	P10922	2	2	2	Histone H1.0;Histone H1.0, N-terminally processed	H1f0	sp|P10922|H10_MOUSE Histone H1.0 OS=Mus musculus OX=10090 GN=H1-0 PE=2 SV=4	1	2	2	2	1	0	1	1	1	0	1	1	1	0	1	1	10.8	10.8	10.8	20.861	194	194	2.33		2	1		0.00098425	11.672	4.1	0	6.7	6.7	40067000	15910000	0	7190300	16967000	0	0	0	0
P11031	P11031	2	2	2	Activated RNA polymerase II transcriptional coactivator p15	Sub1	sp|P11031|TCP4_MOUSE Activated RNA polymerase II transcriptional coactivator p15 OS=Mus musculus OX=10090 GN=Sub1 PE=1 SV=3	1	2	2	2	2	1	1	1	2	1	1	1	2	1	1	1	18.9	18.9	18.9	14.427	127	127	4				5	0.0012937	18.586	18.9	8.7	8.7	8.7	326660000	97671000	145340000	44229000	39425000	0	0	0	0
P11352	P11352	4	4	4	Glutathione peroxidase 1	Gpx1	sp|P11352|GPX1_MOUSE Glutathione peroxidase 1 OS=Mus musculus OX=10090 GN=Gpx1 PE=1 SV=2	1	4	4	4	1	4	3	2	1	4	3	2	1	4	3	2	24.9	24.9	24.9	22.329	201	201	3.09			10	1	0	28.509	4.5	24.9	17.4	10.4	140700000	8299000	92394000	31918000	8092000	0	100740000	26490000	52103000
P11404	P11404	5	5	5	Fatty acid-binding protein, heart	Fabp3	sp|P11404|FABPH_MOUSE Fatty acid-binding protein, heart OS=Mus musculus OX=10090 GN=Fabp3 PE=1 SV=5	1	5	5	5	4	5	4	2	4	5	4	2	4	5	4	2	41.4	41.4	41.4	14.819	133	133	4				16	0	79.336	30.8	41.4	34.6	17.3	1478600000	373980000	703530000	276060000	124980000	510090000	505270000	450230000	508050000
P11499	P11499	40	40	22	Heat shock protein HSP 90-beta	Hsp90ab1	sp|P11499|HS90B_MOUSE Heat shock protein HSP 90-beta OS=Mus musculus OX=10090 GN=Hsp90ab1 PE=1 SV=3	1	40	40	22	19	38	25	31	19	38	25	31	9	21	13	17	45.4	45.4	27.9	83.28	724	724	1.64	123	50	35	6	0	323.31	28	45	30.7	36.2	23251000000	1438800000	11080000000	3543100000	7188800000	892820000	1907000000	1482900000	1532700000
P11531	P11531	2	2	2	Dystrophin	Dmd	sp|P11531|DMD_MOUSE Dystrophin OS=Mus musculus OX=10090 GN=Dmd PE=1 SV=3	1	2	2	2	0	0	1	1	0	0	1	1	0	0	1	1	0.8	0.8	0.8	425.83	3678	3678	1.5	1	1			0.0013928	11.152	0	0	0.3	0.5	12676000	0	0	0	12676000	0	0	0	0
P11627	P11627	8	8	8	Neural cell adhesion molecule L1	L1cam	sp|P11627|L1CAM_MOUSE Neural cell adhesion molecule L1 OS=Mus musculus OX=10090 GN=L1cam PE=1 SV=1	1	8	8	8	0	6	3	6	0	6	3	6	0	6	3	6	8.9	8.9	8.9	140.97	1260	1260	1.07	14	1			0	69.161	0	6.3	3.1	6.7	388310000	0	179830000	69231000	139250000	0	48357000	82129000	57641000
P11798	P11798	17	17	12	Calcium/calmodulin-dependent protein kinase type II subunit alpha	Camk2a	sp|P11798|KCC2A_MOUSE Calcium/calmodulin-dependent protein kinase type II subunit alpha OS=Mus musculus OX=10090 GN=Camk2a PE=1 SV=2	1	17	17	12	14	14	17	16	14	14	17	16	9	9	12	11	34.7	34.7	24.1	54.114	478	478	2.5	30	87	68	37	0	323.31	29.3	29.3	34.7	34.7	47756000000	9303700000	5758800000	17472000000	15222000000	3791500000	2575800000	2946700000	2672200000
P11881;Q9Z329	P11881	15;2	15;2	15;2	Inositol 1,4,5-trisphosphate receptor type 1	Itpr1	sp|P11881|ITPR1_MOUSE Inositol 1,4,5-trisphosphate receptor type 1 OS=Mus musculus OX=10090 GN=Itpr1 PE=1 SV=2	2	15	15	15	0	14	1	3	0	14	1	3	0	14	1	3	6.6	6.6	6.6	313.16	2749	2749;2701	1	18				0	100.29	0	6.2	0.4	1.3	280290000	0	206820000	14164000	59300000	0	58929000	0	15808000
P11983	P11983	16	16	16	T-complex protein 1 subunit alpha	Tcp1	sp|P11983|TCPA_MOUSE T-complex protein 1 subunit alpha OS=Mus musculus OX=10090 GN=Tcp1 PE=1 SV=3	1	16	16	16	4	2	11	15	4	2	11	15	4	2	11	15	35.1	35.1	35.1	60.448	556	556	2.11	1	32	3	1	0	129.48	7.6	3.8	22.1	32.4	1262000000	75215000	28109000	487900000	670760000	70434000	52938000	124620000	137900000
P12023	P12023	5	5	5	Amyloid beta A4 protein;N-APP;Soluble APP-alpha;Soluble APP-beta;C99;Beta-amyloid protein 42;Beta-amyloid protein 40;C83;P3(42);P3(40);C80;Gamma-secretase C-terminal fragment 59;Gamma-secretase C-terminal fragment 57;Gamma-secretase C-terminal fragment 50;C31	App	sp|P12023|A4_MOUSE Amyloid-beta precursor protein OS=Mus musculus OX=10090 GN=App PE=1 SV=3	1	5	5	5	1	4	2	4	1	4	2	4	1	4	2	4	7.9	7.9	7.9	86.721	770	770	1.54	10	1		2	0	37.177	1.3	6.8	2.9	6.4	193540000	1906800	119060000	14812000	57763000	0	37329000	19584000	25983000
P12367	P12367	8	6	6	cAMP-dependent protein kinase type II-alpha regulatory subunit	Prkar2a	sp|P12367|KAP2_MOUSE cAMP-dependent protein kinase type II-alpha regulatory subunit OS=Mus musculus OX=10090 GN=Prkar2a PE=1 SV=2	1	8	6	6	2	2	7	7	1	1	5	5	1	1	5	5	26.7	19.5	19.5	45.389	401	401	2.17		10	2		0	42.217	6	6	24.7	23.9	417480000	13181000	8271600	179770000	216250000	0	0	91843000	115120000
P12382	P12382	16	12	12	ATP-dependent 6-phosphofructokinase, liver type	Pfkl	sp|P12382|PFKAL_MOUSE ATP-dependent 6-phosphofructokinase, liver type OS=Mus musculus OX=10090 GN=Pfkl PE=1 SV=4	1	16	12	12	4	15	5	10	1	11	2	6	1	11	2	6	22.8	16.9	16.9	85.359	780	780	1.46	16	6	1	1	0	90.116	7.1	22.8	7.3	14.9	941310000	53659000	573700000	75030000	238920000	0	155830000	80478000	97697000
P12658	P12658	11	11	10	Calbindin	Calb1	sp|P12658|CALB1_MOUSE Calbindin OS=Mus musculus OX=10090 GN=Calb1 PE=1 SV=2	1	11	11	10	9	8	4	7	9	8	4	7	8	8	4	6	46.7	46.7	42.5	29.994	261	261	3			33		0	113.14	41.8	32.2	19.5	31	1299800000	545150000	376570000	155650000	222480000	445840000	438530000	284770000	338260000
P12787	P12787	7	7	7	Cytochrome c oxidase subunit 5A, mitochondrial	Cox5a	sp|P12787|COX5A_MOUSE Cytochrome c oxidase subunit 5A, mitochondrial OS=Mus musculus OX=10090 GN=Cox5a PE=1 SV=2	1	7	7	7	4	6	5	4	4	6	5	4	4	6	5	4	39	39	39	16.101	146	146	3.95			1	21	0	323.31	21.9	33.6	27.4	21.9	2095700000	497170000	1093500000	226730000	278390000	677390000	572540000	401570000	592880000
P12815	P12815	2	2	2	Programmed cell death protein 6	Pdcd6	sp|P12815|PDCD6_MOUSE Programmed cell death protein 6 OS=Mus musculus OX=10090 GN=Pdcd6 PE=1 SV=2	1	2	2	2	1	2	0	0	1	2	0	0	1	2	0	0	10.5	10.5	10.5	21.867	191	191	3.25			3	1	0.0011044	13.248	5.8	10.5	0	0	110610000	36677000	73928000	0	0	0	0	0	0
P12849	P12849	3	2	2	cAMP-dependent protein kinase type I-beta regulatory subunit	Prkar1b	sp|P12849|KAP1_MOUSE cAMP-dependent protein kinase type I-beta regulatory subunit OS=Mus musculus OX=10090 GN=Prkar1b PE=1 SV=2	1	3	2	2	0	0	2	3	0	0	1	2	0	0	1	2	8.7	5.5	5.5	43.224	381	381	2		3			0.001113	13.388	0	0	6.3	8.7	45395000	0	0	14781000	30614000	0	0	0	0
P12960	P12960	25	25	25	Contactin-1	Cntn1	sp|P12960|CNTN1_MOUSE Contactin-1 OS=Mus musculus OX=10090 GN=Cntn1 PE=1 SV=1	1	25	25	25	9	25	12	18	9	25	12	18	9	25	12	18	29.7	29.7	29.7	113.39	1020	1020	1.62	64	17	17	4	0	323.31	9.3	29.7	13.7	22.4	5619200000	326050000	2463300000	913960000	1915900000	189030000	234640000	254380000	266030000
P12970	P12970	8	8	8	60S ribosomal protein L7a	Rpl7a	sp|P12970|RL7A_MOUSE 60S ribosomal protein L7a OS=Mus musculus OX=10090 GN=Rpl7a PE=1 SV=2	1	8	8	8	5	5	1	1	5	5	1	1	5	5	1	1	26.3	26.3	26.3	29.976	266	266	3			13		0	52.386	17.7	22.6	3.4	4.9	384100000	191660000	161120000	10959000	20361000	299910000	127570000	0	0
P13020;CON__Q3SX14	P13020;CON__Q3SX14	5;4	5;4	5;4	Gelsolin	Gsn	sp|P13020|GELS_MOUSE Gelsolin OS=Mus musculus OX=10090 GN=Gsn PE=1 SV=3;	2	5	5	5	1	4	1	2	1	4	1	2	1	4	1	2	7.8	7.8	7.8	85.941	780	780;781	1.25	7		1		0	31.702	1.4	6.4	1.4	2.8	96924000	5907000	73207000	3767900	14042000	0	0	0	0
P13595	P13595	22	22	22	Neural cell adhesion molecule 1	Ncam1	sp|P13595|NCAM1_MOUSE Neural cell adhesion molecule 1 OS=Mus musculus OX=10090 GN=Ncam1 PE=1 SV=3	1	22	22	22	6	19	17	21	6	19	17	21	6	19	17	21	26.5	26.5	26.5	119.43	1115	1115	1.24	77	9	5	1	0	323.31	7.2	24.4	20.8	25.3	8336500000	370580000	3560200000	1634900000	2770700000	386210000	636100000	645330000	690160000
P13707	P13707	9	9	8	Glycerol-3-phosphate dehydrogenase [NAD(+)], cytoplasmic	Gpd1	sp|P13707|GPDA_MOUSE Glycerol-3-phosphate dehydrogenase [NAD(+)], cytoplasmic OS=Mus musculus OX=10090 GN=Gpd1 PE=1 SV=3	1	9	9	8	2	8	7	4	2	8	7	4	2	7	7	4	24.6	24.6	21.5	37.572	349	349	3	2		22	4	0	67.391	5.4	21.8	18.9	12	871130000	62946000	380240000	305050000	122890000	75065000	316450000	207430000	235600000
P14094	P14094	10	10	10	Sodium/potassium-transporting ATPase subunit beta-1	Atp1b1	sp|P14094|AT1B1_MOUSE Sodium/potassium-transporting ATPase subunit beta-1 OS=Mus musculus OX=10090 GN=Atp1b1 PE=1 SV=1	1	10	10	10	6	6	5	10	6	6	5	10	6	6	5	10	36.5	36.5	36.5	35.194	304	304	2.2	23	35	14	13	0	323.31	18.4	18.4	14.8	36.5	19286000000	3187000000	2340900000	5144200000	8613600000	1869200000	2311500000	2147100000	2528800000
P14106	P14106	3	3	3	Complement C1q subcomponent subunit B	C1qb	sp|P14106|C1QB_MOUSE Complement C1q subcomponent subunit B OS=Mus musculus OX=10090 GN=C1qb PE=1 SV=2	1	3	3	3	1	3	2	0	1	3	2	0	1	3	2	0	15.4	15.4	15.4	26.717	253	253	3			6		0.0013774	20.161	4.7	15.4	9.9	0	294490000	24364000	143560000	126560000	0	0	134960000	186110000	0
P14115	P14115	2	2	2	60S ribosomal protein L27a	Rpl27a	sp|P14115|RL27A_MOUSE 60S ribosomal protein L27a OS=Mus musculus OX=10090 GN=Rpl27a PE=1 SV=5	1	2	2	2	2	1	0	1	2	1	0	1	2	1	0	1	14.2	14.2	14.2	16.605	148	148	3	2		2	4	0.0012739	18.184	14.2	7.4	0	7.4	243770000	130630000	82399000	0	30740000	0	0	0	0
P14131	P14131	9	9	9	40S ribosomal protein S16	Rps16	sp|P14131|RS16_MOUSE 40S ribosomal protein S16 OS=Mus musculus OX=10090 GN=Rps16 PE=1 SV=4	1	9	9	9	8	8	4	5	8	8	4	5	8	8	4	5	47.3	47.3	47.3	16.445	146	146	4				25	0	117.55	45.9	42.5	26.7	28.8	1190700000	333690000	660970000	79494000	116570000	273340000	300770000	213000000	292040000
P14148	P14148	15	15	15	60S ribosomal protein L7	Rpl7	sp|P14148|RL7_MOUSE 60S ribosomal protein L7 OS=Mus musculus OX=10090 GN=Rpl7 PE=1 SV=2	1	15	15	15	7	12	7	6	7	12	7	6	7	12	7	6	40.7	40.7	40.7	31.419	270	270	3			32		0	118.34	24.1	40.7	26.7	23.7	1034200000	259640000	395760000	222960000	155870000	406960000	329600000	185970000	243980000
P14152	P14152	12	12	12	Malate dehydrogenase, cytoplasmic	Mdh1	sp|P14152|MDHC_MOUSE Malate dehydrogenase, cytoplasmic OS=Mus musculus OX=10090 GN=Mdh1 PE=1 SV=3	1	12	12	12	8	11	9	9	8	11	9	9	8	11	9	9	41.3	41.3	41.3	36.511	334	334	2.9	7	10	57	15	0	323.31	28.4	33.5	36.2	28.4	32500000000	4359200000	12920000000	9612200000	5608700000	2448000000	5612700000	4725400000	4718700000
P14206	P14206	8	8	8	40S ribosomal protein SA	Rpsa	sp|P14206|RSSA_MOUSE 40S ribosomal protein SA OS=Mus musculus OX=10090 GN=Rpsa PE=1 SV=4	1	8	8	8	4	4	5	8	4	4	5	8	4	4	5	8	31.9	31.9	31.9	32.838	295	295	2.52		18	4	5	0	66.547	16.3	16.3	16.6	31.9	723400000	94559000	57052000	246780000	325010000	150660000	45184000	135040000	142180000
P14211	P14211	9	9	9	Calreticulin	Calr	sp|P14211|CALR_MOUSE Calreticulin OS=Mus musculus OX=10090 GN=Calr PE=1 SV=1	1	9	9	9	4	4	5	8	4	4	5	8	4	4	5	8	19	19	19	47.994	416	416	2.5		18	12	2	0	65.476	9.9	9.9	11.5	17.3	896920000	127650000	118510000	303510000	347240000	164950000	119840000	131370000	132040000
P14231	P14231	7	7	7	Sodium/potassium-transporting ATPase subunit beta-2	Atp1b2	sp|P14231|AT1B2_MOUSE Sodium/potassium-transporting ATPase subunit beta-2 OS=Mus musculus OX=10090 GN=Atp1b2 PE=1 SV=2	1	7	7	7	4	3	7	4	4	3	7	4	4	3	7	4	17.2	17.2	17.2	33.344	290	290	2.22	1	16	6		0	86.973	11	10	17.2	12.4	1003500000	149980000	65741000	586240000	201540000	448720000	100170000	134140000	226710000
P14685	P14685	13	13	13	26S proteasome non-ATPase regulatory subunit 3	Psmd3	sp|P14685|PSMD3_MOUSE 26S proteasome non-ATPase regulatory subunit 3 OS=Mus musculus OX=10090 GN=Psmd3 PE=1 SV=3	1	13	13	13	1	1	7	10	1	1	7	10	1	1	7	10	25.3	25.3	25.3	60.718	530	530	2	1	18	1		0	93.177	1.7	1.7	14.3	20	292750000	5927100	3933900	126110000	156780000	0	0	33970000	40601000
P14733	P14733	5	4	4	Lamin-B1	Lmnb1	sp|P14733|LMNB1_MOUSE Lamin-B1 OS=Mus musculus OX=10090 GN=Lmnb1 PE=1 SV=3	1	5	4	4	0	0	3	3	0	0	2	3	0	0	2	3	9.4	8	8	66.785	588	588	2		6			0.00078616	25.302	0	0	5.1	6.1	74024000	0	0	28434000	45589000	0	0	0	0
P14824	P14824	20	20	20	Annexin A6	Anxa6	sp|P14824|ANXA6_MOUSE Annexin A6 OS=Mus musculus OX=10090 GN=Anxa6 PE=1 SV=3	1	20	20	20	5	2	11	19	5	2	11	19	5	2	11	19	32.8	32.8	32.8	75.884	673	673	2.13	1	31	6		0	147.04	8.8	2.7	18.7	31.4	1062400000	73187000	9598700	321430000	658190000	54108000	4495200	82895000	138060000
P14869	P14869	7	7	7	60S acidic ribosomal protein P0	Rplp0	sp|P14869|RLA0_MOUSE 60S acidic ribosomal protein P0 OS=Mus musculus OX=10090 GN=Rplp0 PE=1 SV=3	1	7	7	7	4	5	5	4	4	5	5	4	4	5	5	4	32.5	32.5	32.5	34.216	317	317	3.05			18	1	0	141.57	13.9	24	19.2	13.9	1010600000	65756000	292460000	428620000	223740000	73727000	171210000	322230000	336510000
P14873	P14873	39	38	38	Microtubule-associated protein 1B;MAP1B heavy chain;MAP1 light chain LC1	Map1b	sp|P14873|MAP1B_MOUSE Microtubule-associated protein 1B OS=Mus musculus OX=10090 GN=Map1b PE=1 SV=2	1	39	38	38	9	32	22	28	9	31	21	27	9	31	21	27	20.3	19.8	19.8	270.25	2464	2464	1.37	82	8	14	1	0	323.31	4.7	16.8	11	14.5	4522700000	198560000	2343400000	814880000	1165800000	193200000	326250000	277550000	311510000
P15105	P15105	8	8	8	Glutamine synthetase	Glul	sp|P15105|GLNA_MOUSE Glutamine synthetase OS=Mus musculus OX=10090 GN=Glul PE=1 SV=6	1	8	8	8	4	6	7	8	4	6	7	8	4	6	7	8	24.7	24.7	24.7	42.119	373	373	2.42	10	22	16	9	0	323.31	10.7	15.8	20.1	24.7	7657300000	1493800000	1062700000	2334000000	2766900000	1720500000	859010000	1219100000	1363800000
P15116	P15116	4	4	4	Cadherin-2	Cdh2	sp|P15116|CADH2_MOUSE Cadherin-2 OS=Mus musculus OX=10090 GN=Cdh2 PE=1 SV=2	1	4	4	4	0	4	1	1	0	4	1	1	0	4	1	1	6.5	6.5	6.5	99.795	906	906	1.17	5	1			0	29.371	0	6.5	1	1.8	91479000	0	81473000	5217400	4788200	0	0	0	0
P15209	P15209	2	2	1	BDNF/NT-3 growth factors receptor	Ntrk2	sp|P15209|NTRK2_MOUSE BDNF/NT-3 growth factors receptor OS=Mus musculus OX=10090 GN=Ntrk2 PE=1 SV=1	1	2	2	1	0	2	0	1	0	2	0	1	0	1	0	1	3.2	3.2	1.3	92.132	821	821	1	3				0.0011236	13.638	0	3.2	0	1.3	53642000	0	46153000	0	7489400	0	0	0	0
P15327	P15327	3	3	3	Bisphosphoglycerate mutase	Bpgm	sp|P15327|PMGE_MOUSE Bisphosphoglycerate mutase OS=Mus musculus OX=10090 GN=Bpgm PE=1 SV=2	1	3	3	3	0	3	0	0	0	3	0	0	0	3	0	0	15.1	15.1	15.1	29.978	259	259	3			3		0.001243	17.874	0	15.1	0	0	32237000	0	32237000	0	0	0	0	0	0
P15508	P15508	15	12	12	Spectrin beta chain, erythrocytic	Sptb	sp|P15508|SPTB1_MOUSE Spectrin beta chain, erythrocytic OS=Mus musculus OX=10090 GN=Sptb PE=1 SV=4	1	15	12	12	1	14	0	5	0	11	0	4	0	11	0	4	8.8	7.5	7.5	245.25	2128	2128	1	15				0	72.774	0.8	8.1	0	3.3	116540000	0	95141000	0	21398000	0	19357000	0	6294900
P15532	P15532	7	7	3	Nucleoside diphosphate kinase A	Nme1	sp|P15532|NDKA_MOUSE Nucleoside diphosphate kinase A OS=Mus musculus OX=10090 GN=Nme1 PE=1 SV=1	1	7	7	3	6	7	6	5	6	7	6	5	3	3	2	1	48	48	23	17.208	152	152	4				32	0	99.134	36.8	48	38.2	31.6	6522300000	1537700000	3178400000	863650000	942540000	1937600000	1603500000	1340900000	1599400000
P16045	P16045	1	1	1	Galectin-1	Lgals1	sp|P16045|LEG1_MOUSE Galectin-1 OS=Mus musculus OX=10090 GN=Lgals1 PE=1 SV=3	1	1	1	1	1	1	0	1	1	1	0	1	1	1	0	1	5.9	5.9	5.9	14.866	135	135	4				3	0.0030159	6.4839	5.9	5.9	0	5.9	62385000	17072000	34416000	0	10897000	0	0	0	0
P16054	P16054	6	6	6	Protein kinase C epsilon type	Prkce	sp|P16054|KPCE_MOUSE Protein kinase C epsilon type OS=Mus musculus OX=10090 GN=Prkce PE=1 SV=1	1	6	6	6	0	5	0	5	0	5	0	5	0	5	0	5	7.2	7.2	7.2	83.56	737	737	1.09	10	1			0	38.108	0	5.6	0	7.2	190880000	0	129270000	0	61614000	0	42145000	0	29053000
P16125	P16125	16	15	15	L-lactate dehydrogenase B chain	Ldhb	sp|P16125|LDHB_MOUSE L-lactate dehydrogenase B chain OS=Mus musculus OX=10090 GN=Ldhb PE=1 SV=2	1	16	15	15	12	15	16	12	12	14	15	12	12	14	15	12	42.8	39.2	39.2	36.572	334	334	2.65	15	28	66	15	0	323.31	39.2	42.8	42.8	36.5	24814000000	2597100000	7399800000	10142000000	4675500000	1767900000	3707100000	4101000000	4837200000
P16330	P16330	23	23	23	2,3-cyclic-nucleotide 3-phosphodiesterase	Cnp	sp|P16330|CN37_MOUSE 2,3-cyclic-nucleotide 3-phosphodiesterase OS=Mus musculus OX=10090 GN=Cnp PE=1 SV=3	1	23	23	23	8	15	16	22	8	15	16	22	8	15	16	22	37.1	37.1	37.1	47.123	420	420	2.23	15	60	24	8	0	224.72	19.3	27.1	27.4	37.1	7368000000	510800000	1045600000	1570700000	4240800000	224820000	599160000	283410000	624290000
P16332	P16332	3	3	3	Methylmalonyl-CoA mutase, mitochondrial	Mut	sp|P16332|MUTA_MOUSE Methylmalonyl-CoA mutase, mitochondrial OS=Mus musculus OX=10090 GN=Mmut PE=1 SV=2	1	3	3	3	0	2	1	1	0	2	1	1	0	2	1	1	5.1	5.1	5.1	82.843	748	748	1.5	2	2			0.001194	17.274	0	3.2	1.5	1.9	35902000	0	19095000	8023200	8784300	0	0	0	0
Q62167;P16381	Q62167;P16381	10;10	9;9	1;1	ATP-dependent RNA helicase DDX3X;Putative ATP-dependent RNA helicase Pl10	Ddx3x;D1Pas1	sp|Q62167|DDX3X_MOUSE ATP-dependent RNA helicase DDX3X OS=Mus musculus OX=10090 GN=Ddx3x PE=1 SV=3;sp|P16381|DDX3L_MOUSE Putative ATP-dependent RNA helicase Pl10 OS=Mus musculus OX=10090 GN=D1Pas1 PE=1 SV=1	2	10	9	1	1	4	6	8	1	4	5	8	1	1	1	1	16.8	15.1	1.8	73.101	662	662;660	1.79	5	13	1		0	83.457	1.8	6.5	9.1	13.6	313360000	9416500	51078000	94560000	158310000	0	21093000	38162000	47337000
P16388;P16390;B2RQA1	P16388;P16390	4;3;1	4;3;1	1;0;0	Potassium voltage-gated channel subfamily A member 1;Potassium voltage-gated channel subfamily A member 3	Kcna1;Kcna3	sp|P16388|KCNA1_MOUSE Potassium voltage-gated channel subfamily A member 1 OS=Mus musculus OX=10090 GN=Kcna1 PE=1 SV=1;sp|P16390|KCNA3_MOUSE Potassium voltage-gated channel subfamily A member 3 OS=Mus musculus OX=10090 GN=Kcna3 PE=1 SV=3	3	4	4	1	2	2	2	4	2	2	2	4	0	0	0	1	8.7	8.7	2.2	56.409	495	495;528;511	1.79	5	7	2		0.000819	26.819	3.8	3.8	3.8	8.7	251830000	12599000	42038000	43378000	153810000	27381000	33161000	31330000	56619000
P16460	P16460	4	4	4	Argininosuccinate synthase	Ass1	sp|P16460|ASSY_MOUSE Argininosuccinate synthase OS=Mus musculus OX=10090 GN=Ass1 PE=1 SV=1	1	4	4	4	0	0	2	4	0	0	2	4	0	0	2	4	8.7	8.7	8.7	46.584	412	412	2		6			0.00073801	23.739	0	0	4.1	8.7	96983000	0	0	43531000	53451000	0	0	31307000	24639000
P16546;P08032	P16546	152;1	152;1	152;1	Spectrin alpha chain, non-erythrocytic 1	Sptan1	sp|P16546|SPTN1_MOUSE Spectrin alpha chain, non-erythrocytic 1 OS=Mus musculus OX=10090 GN=Sptan1 PE=1 SV=4	2	152	152	152	58	138	96	121	58	138	96	121	58	138	96	121	57.3	57.3	57.3	284.59	2472	2472;2415	1.55	448	169	82	22	0	323.31	28.6	53.1	43.1	49.3	56346000000	3430200000	26132000000	9832600000	16951000000	659210000	994440000	805400000	818950000
P16675	P16675	2	2	2	Lysosomal protective protein;Lysosomal protective protein 32 kDa chain;Lysosomal protective protein 20 kDa chain	Ctsa	sp|P16675|PPGB_MOUSE Lysosomal protective protein OS=Mus musculus OX=10090 GN=Ctsa PE=1 SV=1	1	2	2	2	1	2	0	1	1	2	0	1	1	2	0	1	2.3	2.3	2.3	53.844	474	474	3.8			1	4	0.0011547	15.44	2.1	2.3	0	2.1	14690000	1903600	9984200	0	2802200	0	0	0	0
P16858;Q64467	P16858	16;2	16;2	16;2	Glyceraldehyde-3-phosphate dehydrogenase	Gapdh	sp|P16858|G3P_MOUSE Glyceraldehyde-3-phosphate dehydrogenase OS=Mus musculus OX=10090 GN=Gapdh PE=1 SV=2	2	16	16	16	15	15	15	15	15	15	15	15	15	15	15	15	49.5	49.5	49.5	35.81	333	333;440	2.82	16	52	135	40	0	323.31	49.5	49.5	49.5	49.5	76410000000	11259000000	15561000000	31073000000	18517000000	8249000000	7862600000	15059000000	14208000000
P17156	P17156	14	6	6	Heat shock-related 70 kDa protein 2	Hspa2	sp|P17156|HSP72_MOUSE Heat shock-related 70 kDa protein 2 OS=Mus musculus OX=10090 GN=Hspa2 PE=1 SV=2	1	14	6	6	9	9	12	14	1	1	4	6	1	1	4	6	22.6	10.3	10.3	69.641	633	633	2.15		11	2		0	40.254	14.2	14.2	18.6	22.6	289680000	14789000	4602500	134100000	136190000	0	0	64436000	49510000
P17182;P21550	P17182	21;2	21;2	19;1	Alpha-enolase	Eno1	sp|P17182|ENOA_MOUSE Alpha-enolase OS=Mus musculus OX=10090 GN=Eno1 PE=1 SV=3	2	21	21	19	13	16	20	18	13	16	20	18	11	14	18	16	60.8	60.8	53.7	47.14	434	434;434	2.51	13	89	53	26	0	323.31	42.2	51.6	56.2	58.3	47919000000	10744000000	4204100000	18032000000	14938000000	4191300000	2910300000	3138500000	2953700000
P17183	P17183	16	14	14	Gamma-enolase	Eno2	sp|P17183|ENOG_MOUSE Gamma-enolase OS=Mus musculus OX=10090 GN=Eno2 PE=1 SV=2	1	16	14	14	12	10	15	16	10	8	13	14	10	8	13	14	57.4	50.2	50.2	47.296	434	434	2.57		56	20	16	0	257.41	43.3	38	57.4	57.4	12848000000	1311200000	1129600000	4757300000	5650000000	1077800000	1118200000	990790000	1051500000
P17426	P17426	33	33	24	AP-2 complex subunit alpha-1	Ap2a1	sp|P17426|AP2A1_MOUSE AP-2 complex subunit alpha-1 OS=Mus musculus OX=10090 GN=Ap2a1 PE=1 SV=1	1	33	33	24	12	30	20	28	12	30	20	28	10	22	14	20	33.4	33.4	25.1	107.66	977	977	1.75	91	45	27	10	0	323.31	13.4	31.7	22.7	33.3	9738700000	977830000	3892600000	1828800000	3039400000	569050000	444990000	405630000	372980000
P17427	P17427	29	20	20	AP-2 complex subunit alpha-2	Ap2a2	sp|P17427|AP2A2_MOUSE AP-2 complex subunit alpha-2 OS=Mus musculus OX=10090 GN=Ap2a2 PE=1 SV=2	1	29	20	20	10	26	19	26	8	18	13	18	8	18	13	18	32.5	23.9	23.9	104.02	938	938	1.5	60	21	13		0	231.23	11.2	29.4	19.4	28.8	3896900000	222880000	1619300000	678300000	1376400000	171360000	184980000	205540000	201220000
Q63836;P17563	Q63836;P17563	2;2	2;2	2;2	Selenium-binding protein 2;Selenium-binding protein 1	Selenbp2;Selenbp1	sp|Q63836|SBP2_MOUSE Selenium-binding protein 2 OS=Mus musculus OX=10090 GN=Selenbp2 PE=1 SV=2;sp|P17563|SBP1_MOUSE Methanethiol oxidase OS=Mus musculus OX=10090 GN=Selenbp1 PE=1 SV=2	2	2	2	2	0	0	0	2	0	0	0	2	0	0	0	2	4.4	4.4	4.4	52.609	472	472;472	2		2			0.0010111	11.925	0	0	0	4.4	100240000	0	0	0	100240000	0	0	0	0
P17665	P17665	1	1	1	Cytochrome c oxidase subunit 7C, mitochondrial	Cox7c	sp|P17665|COX7C_MOUSE Cytochrome c oxidase subunit 7C, mitochondrial OS=Mus musculus OX=10090 GN=Cox7c PE=1 SV=1	1	1	1	1	1	1	1	1	1	1	1	1	1	1	1	1	14.3	14.3	14.3	7.3325	63	63	4				4	0.0021825	6.676	14.3	14.3	14.3	14.3	188830000	90698000	63184000	15745000	19200000	0	0	0	0
P17710;O08528;Q91W97;Q3TRM8	P17710	37;4;3;1	37;4;3;1	37;4;3;1	Hexokinase-1	Hk1	sp|P17710|HXK1_MOUSE Hexokinase-1 OS=Mus musculus OX=10090 GN=Hk1 PE=1 SV=3	4	37	37	37	22	35	30	35	22	35	30	35	22	35	30	35	36.1	36.1	36.1	108.3	974	974;917;915;922	1.76	141	61	54	12	0	323.31	21.5	35	31.9	35.1	20798000000	1805100000	7730900000	4422100000	6839500000	471820000	598360000	660860000	672720000
P17742	P17742	10	10	10	Peptidyl-prolyl cis-trans isomerase A;Peptidyl-prolyl cis-trans isomerase A, N-terminally processed	Ppia	sp|P17742|PPIA_MOUSE Peptidyl-prolyl cis-trans isomerase A OS=Mus musculus OX=10090 GN=Ppia PE=1 SV=2	1	10	10	10	8	10	8	9	8	10	8	9	8	10	8	9	54.3	54.3	54.3	17.971	164	164	3.96			3	67	0	275.22	39.6	54.3	39.6	45.7	30964000000	7291900000	15321000000	3723500000	4627300000	5947400000	5729100000	4702800000	6343200000
P17751	P17751	12	12	12	Triosephosphate isomerase	Tpi1	sp|P17751|TPIS_MOUSE Triosephosphate isomerase OS=Mus musculus OX=10090 GN=Tpi1 PE=1 SV=5	1	12	12	12	8	12	10	9	8	12	10	9	8	12	10	9	58.6	58.6	58.6	26.712	249	249	2.95	6	5	62	13	0	323.31	43	58.6	50.6	43.4	28088000000	6206200000	11879000000	6528200000	3474800000	5469000000	6083300000	4313800000	4754800000
P17809	P17809	3	3	3	Solute carrier family 2, facilitated glucose transporter member 1	Slc2a1	sp|P17809|GTR1_MOUSE Solute carrier family 2, facilitated glucose transporter member 1 OS=Mus musculus OX=10090 GN=Slc2a1 PE=1 SV=4	1	3	3	3	1	2	2	3	1	2	2	3	1	2	2	3	3.9	3.9	3.9	53.984	492	492	1.5	5	5			0.0013523	19.522	2	3.7	3.7	3.9	191700000	7983400	50963000	49975000	82780000	0	28059000	31187000	37232000
Q61696;P17879	Q61696;P17879	8;8	6;6	3;3	Heat shock 70 kDa protein 1A;Heat shock 70 kDa protein 1B	Hspa1a;Hspa1b	sp|Q61696|HS71A_MOUSE Heat shock 70 kDa protein 1A OS=Mus musculus OX=10090 GN=Hspa1a PE=1 SV=2;sp|P17879|HS71B_MOUSE Heat shock 70 kDa protein 1B OS=Mus musculus OX=10090 GN=Hspa1b PE=1 SV=3	2	8	6	3	4	2	6	8	2	0	4	6	0	0	2	3	15.8	12	5.9	70.078	641	641;642	2.08		11	1		0	53.32	8.1	3.7	11.7	15.8	273380000	14243000	0	112240000	146900000	39136000	0	58443000	47744000
P17897	P17897	1	1	1	Lysozyme C-1	Lyz1	sp|P17897|LYZ1_MOUSE Lysozyme C-1 OS=Mus musculus OX=10090 GN=Lyz1 PE=1 SV=1	1	1	1	1	1	1	1	1	1	1	1	1	1	1	1	1	8.1	8.1	8.1	16.794	148	148	2.86	2		2	3	0.0011723	16.926	8.1	8.1	8.1	8.1	155660000	35615000	81688000	28002000	10356000	0	0	0	0
P18052	P18052	2	2	2	Receptor-type tyrosine-protein phosphatase alpha	Ptpra	sp|P18052|PTPRA_MOUSE Receptor-type tyrosine-protein phosphatase alpha OS=Mus musculus OX=10090 GN=Ptpra PE=1 SV=3	1	2	2	2	0	1	0	2	0	1	0	2	0	1	0	2	2.5	2.5	2.5	93.696	829	829	1	3				0.0010215	12.023	0	1.3	0	2.5	34655000	0	18149000	0	16506000	0	0	0	0
P18242	P18242	3	3	3	Cathepsin D	Ctsd	sp|P18242|CATD_MOUSE Cathepsin D OS=Mus musculus OX=10090 GN=Ctsd PE=1 SV=1	1	3	3	3	0	3	1	2	0	3	1	2	0	3	1	2	7.3	7.3	7.3	44.953	410	410	3.17		3	4	5	0.0012293	17.717	0	7.3	2.4	4.9	439630000	0	176540000	114150000	148940000	0	117360000	0	181890000
P18572	P18572	5	5	5	Basigin	Bsg	sp|P18572|BASI_MOUSE Basigin OS=Mus musculus OX=10090 GN=Bsg PE=1 SV=2	1	5	5	5	3	2	3	5	3	2	3	5	3	2	3	5	14.9	14.9	14.9	42.444	389	389	2.08		12	1		0	36.056	7.7	5.7	8.2	14.9	489590000	33885000	23026000	179230000	253450000	108200000	0	139700000	152190000
P18760	P18760	10	10	9	Cofilin-1	Cfl1	sp|P18760|COF1_MOUSE Cofilin-1 OS=Mus musculus OX=10090 GN=Cfl1 PE=1 SV=3	1	10	10	9	7	10	6	5	7	10	6	5	6	9	5	4	57.8	57.8	51.2	18.559	166	166	3.38	5	3	14	34	0	323.31	49.4	57.8	47.6	39.2	20130000000	5113700000	10225000000	2281100000	2510200000	3150600000	4915200000	4309700000	5294400000
P18872;Q8CGK7	P18872	14;1	14;1	12;0	Guanine nucleotide-binding protein G(o) subunit alpha	Gnao1	sp|P18872|GNAO_MOUSE Guanine nucleotide-binding protein G(o) subunit alpha OS=Mus musculus OX=10090 GN=Gnao1 PE=1 SV=3	2	14	14	12	11	12	13	12	11	12	13	12	9	10	11	10	41.5	41.5	35	40.084	354	354;381	2.35	25	57	53	12	0	323.31	35.6	36.2	41	38.7	31712000000	5083500000	3781300000	12884000000	9963800000	2462000000	2130500000	3941700000	3372100000
P19096	P19096	31	31	31	Fatty acid synthase;[Acyl-carrier-protein] S-acetyltransferase;[Acyl-carrier-protein] S-malonyltransferase;3-oxoacyl-[acyl-carrier-protein] synthase;3-oxoacyl-[acyl-carrier-protein] reductase;3-hydroxyacyl-[acyl-carrier-protein] dehydratase;Enoyl-[acyl-carrier-protein] reductase;Oleoyl-[acyl-carrier-protein] hydrolase	Fasn	sp|P19096|FAS_MOUSE Fatty acid synthase OS=Mus musculus OX=10090 GN=Fasn PE=1 SV=2	1	31	31	31	5	23	13	22	5	23	13	22	5	23	13	22	13.5	13.5	13.5	272.43	2504	2504	1.28	60	10	4	1	0	234.33	2.2	10.1	5.7	9.7	1392800000	53652000	645130000	163920000	530120000	35524000	65829000	43232000	54325000
P19157;P46425	P19157;P46425	7;4	7;4	7;4	Glutathione S-transferase P 1;Glutathione S-transferase P 2	Gstp1;Gstp2	sp|P19157|GSTP1_MOUSE Glutathione S-transferase P 1 OS=Mus musculus OX=10090 GN=Gstp1 PE=1 SV=2;sp|P46425|GSTP2_MOUSE Glutathione S-transferase P 2 OS=Mus musculus OX=10090 GN=Gstp2 PE=1 SV=2	2	7	7	7	4	5	3	3	4	5	3	3	4	5	3	3	50	50	50	23.609	210	210;210	3.15			23	4	0	111.16	29.5	35.2	22.4	22.4	5613200000	909910000	2266200000	1475900000	961190000	1519300000	1867500000	1413100000	1534300000
P19246	P19246	13	11	11	Neurofilament heavy polypeptide	Nefh	sp|P19246|NFH_MOUSE Neurofilament heavy polypeptide OS=Mus musculus OX=10090 GN=Nefh PE=1 SV=3	1	13	11	11	1	12	3	6	0	10	1	4	0	10	1	4	12	10.2	10.2	116.99	1090	1090	1.12	15		1		0	77.066	0.8	10.8	2.9	6.1	269360000	0	188310000	3943800	77103000	0	30504000	0	55181000
P19253	P19253	4	4	4	60S ribosomal protein L13a	Rpl13a	sp|P19253|RL13A_MOUSE 60S ribosomal protein L13a OS=Mus musculus OX=10090 GN=Rpl13a PE=1 SV=4	1	4	4	4	2	4	1	2	2	4	1	2	2	4	1	2	20.2	20.2	20.2	23.464	203	203	3.08			12	1	0	31.274	10.8	20.2	3.9	10.8	449810000	125000000	248080000	10175000	66547000	235490000	289330000	0	192070000
P19258	P19258	1	1	1	Protein Mpv17	Mpv17	sp|P19258|MPV17_MOUSE Protein Mpv17 OS=Mus musculus OX=10090 GN=Mpv17 PE=1 SV=1	1	1	1	1	0	1	0	0	0	1	0	0	0	1	0	0	6.2	6.2	6.2	19.686	176	176	4				1	0.0093878	6.1722	0	6.2	0	0	7966900	0	7966900	0	0	0	0	0	0
P19536	P19536	6	6	6	Cytochrome c oxidase subunit 5B, mitochondrial	Cox5b	sp|P19536|COX5B_MOUSE Cytochrome c oxidase subunit 5B, mitochondrial OS=Mus musculus OX=10090 GN=Cox5b PE=1 SV=1	1	6	6	6	4	6	4	4	4	6	4	4	4	6	4	4	29.7	29.7	29.7	13.813	128	128	4				36	0	323.31	25	29.7	25	25	2011800000	342230000	1146700000	288260000	234590000	411170000	624140000	476820000	521390000
P19783	P19783	13	13	13	Cytochrome c oxidase subunit 4 isoform 1, mitochondrial	Cox4i1	sp|P19783|COX41_MOUSE Cytochrome c oxidase subunit 4 isoform 1, mitochondrial OS=Mus musculus OX=10090 GN=Cox4i1 PE=1 SV=2	1	13	13	13	9	12	8	8	9	12	8	8	9	12	8	8	55.6	55.6	55.6	19.53	169	169	3.79	4			53	0	323.31	48.5	55.6	48.5	48.5	13047000000	2483300000	7499000000	1473100000	1592000000	2135300000	1918000000	1326300000	1839400000
P20029	P20029	25	23	23	78 kDa glucose-regulated protein	Hspa5	sp|P20029|BIP_MOUSE Endoplasmic reticulum chaperone BiP OS=Mus musculus OX=10090 GN=Hspa5 PE=1 SV=3	1	25	23	23	7	18	18	19	5	16	16	17	5	16	16	17	39.7	38	38	72.421	655	655	1.68	24	34	4		0	186.39	11.9	28.5	30.4	33.7	2695500000	100180000	740940000	856850000	997560000	108980000	123340000	182880000	212350000
P20060	P20060	6	6	6	Beta-hexosaminidase subunit beta	Hexb	sp|P20060|HEXB_MOUSE Beta-hexosaminidase subunit beta OS=Mus musculus OX=10090 GN=Hexb PE=1 SV=2	1	6	6	6	1	1	2	5	1	1	2	5	1	1	2	5	9	9	9	61.115	536	536	2.33		7	1	1	0	36.385	1.7	1.9	3.4	7.1	55300000	3005500	6124600	10691000	35478000	0	0	7988700	11802000
P20108	P20108	7	7	7	Thioredoxin-dependent peroxide reductase, mitochondrial	Prdx3	sp|P20108|PRDX3_MOUSE Thioredoxin-dependent peroxide reductase, mitochondrial OS=Mus musculus OX=10090 GN=Prdx3 PE=1 SV=1	1	7	7	7	4	7	5	5	4	7	5	5	4	7	5	5	30.7	30.7	30.7	28.127	257	257	3.07			26	2	0	78.633	18.3	30.7	21.4	21.4	1639600000	207250000	807960000	418790000	205580000	251330000	590130000	405870000	311280000
P20152;P31001;P15331	P20152	14;3;2	13;2;2	13;2;2	Vimentin	Vim	sp|P20152|VIME_MOUSE Vimentin OS=Mus musculus OX=10090 GN=Vim PE=1 SV=3	3	14	13	13	1	1	11	12	0	0	10	11	0	0	10	11	32	30	30	53.687	466	466;469;475	2		21			0	89.445	1.9	1.9	27.7	27.7	667550000	0	0	312400000	355150000	0	0	61200000	73800000
P20352	P20352	1	1	1	Tissue factor	F3	sp|P20352|TF_MOUSE Tissue factor OS=Mus musculus OX=10090 GN=F3 PE=1 SV=2	1	1	1	1	0	0	1	1	0	0	1	1	0	0	1	1	3.1	3.1	3.1	32.935	294	294	2		2			0.0026076	6.5789	0	0	3.1	3.1	18969000	0	0	6923900	12046000	0	0	0	0
P20357	P20357	52	52	52	Microtubule-associated protein 2	Map2	sp|P20357|MTAP2_MOUSE Microtubule-associated protein 2 OS=Mus musculus OX=10090 GN=Map2 PE=1 SV=2	1	52	52	52	18	47	29	41	18	47	29	41	18	47	29	41	30.8	30.8	30.8	199.13	1828	1828	1.32	152	28	13	3	0	323.31	11.1	28.7	17.8	23.6	15531000000	982380000	7053700000	2276800000	5217900000	310480000	485550000	461550000	480220000
P20444	P20444	4	2	2	Protein kinase C alpha type	Prkca	sp|P20444|KPCA_MOUSE Protein kinase C alpha type OS=Mus musculus OX=10090 GN=Prkca PE=1 SV=3	1	4	2	2	0	3	1	2	0	2	0	0	0	2	0	0	7.1	3	3	76.851	672	672	1	2				0.001105	13.262	0	4.8	1.8	4.2	41793000	0	41793000	0	0	0	0	0	0
P20917	P20917	6	6	6	Myelin-associated glycoprotein	Mag	sp|P20917|MAG_MOUSE Myelin-associated glycoprotein OS=Mus musculus OX=10090 GN=Mag PE=1 SV=3	1	6	6	6	0	5	2	5	0	5	2	5	0	5	2	5	12.6	12.6	12.6	69.387	627	627	1	12				0	42.262	0	8.9	4.5	10.7	505110000	0	250570000	29424000	225130000	0	116890000	46148000	116930000
P21107	P21107	14	14	9	Tropomyosin alpha-3 chain	Tpm3	sp|P21107|TPM3_MOUSE Tropomyosin alpha-3 chain OS=Mus musculus OX=10090 GN=Tpm3 PE=1 SV=3	1	14	14	9	9	13	9	6	9	13	9	6	6	8	5	3	35.1	35.1	25.6	32.994	285	285	3			40		0	152.49	21.4	35.1	21.4	17.9	3333600000	1199700000	1152000000	699790000	282140000	1087100000	801150000	571470000	634550000
P21126	P21126	5	5	5	Ubiquitin-like protein 4A	Ubl4a	sp|P21126|UBL4A_MOUSE Ubiquitin-like protein 4A OS=Mus musculus OX=10090 GN=Ubl4a PE=1 SV=1	1	5	5	5	1	4	0	1	1	4	0	1	1	4	0	1	31.8	31.8	31.8	17.8	157	157	4				6	0	29.465	6.4	26.8	0	5.1	52644000	6741700	39812000	0	6090500	0	0	0	0
P21278	P21278	10	10	6	Guanine nucleotide-binding protein subunit alpha-11	Gna11	sp|P21278|GNA11_MOUSE Guanine nucleotide-binding protein subunit alpha-11 OS=Mus musculus OX=10090 GN=Gna11 PE=1 SV=1	1	10	10	6	3	3	4	10	3	3	4	10	1	1	2	6	35.1	35.1	21.2	42.024	359	359	2.41	1	17	9	2	0	186.8	7.8	7.8	11.4	35.1	926810000	143670000	78209000	289060000	415870000	165590000	131580000	140290000	156440000
P21279;P30677	P21279	8;2	4;1	4;1	Guanine nucleotide-binding protein G(q) subunit alpha	Gnaq	sp|P21279|GNAQ_MOUSE Guanine nucleotide-binding protein G(q) subunit alpha OS=Mus musculus OX=10090 GN=Gnaq PE=1 SV=4	2	8	4	4	3	2	3	7	1	0	1	3	1	0	1	3	29	15	15	42.158	359	359;355	2.2		4	1		0.0008	25.974	7.8	5.6	9.2	26.7	224920000	20402000	0	66607000	137910000	0	0	0	0
P21460	P21460	3	3	3	Cystatin-C	Cst3	sp|P21460|CYTC_MOUSE Cystatin-C OS=Mus musculus OX=10090 GN=Cst3 PE=1 SV=2	1	3	3	3	1	2	1	1	1	2	1	1	1	2	1	1	20	20	20	15.531	140	140	3.71			2	5	0	32.881	7.9	8.6	12.1	7.9	395240000	103490000	172150000	67078000	52522000	0	0	0	0
P21619	P21619	9	8	8	Lamin-B2	Lmnb2	sp|P21619|LMNB2_MOUSE Lamin-B2 OS=Mus musculus OX=10090 GN=Lmnb2 PE=1 SV=2	1	9	8	8	0	0	5	6	0	0	4	6	0	0	4	6	15.4	14.1	14.1	67.317	596	596	2		10			0	54.502	0	0	8.2	10.9	151480000	0	0	70138000	81347000	0	0	38304000	27888000
P21981	P21981	1	1	1	Protein-glutamine gamma-glutamyltransferase 2	Tgm2	sp|P21981|TGM2_MOUSE Protein-glutamine gamma-glutamyltransferase 2 OS=Mus musculus OX=10090 GN=Tgm2 PE=1 SV=4	1	1	1	1	0	1	0	1	0	1	0	1	0	1	0	1	1.2	1.2	1.2	77.06	686	686	1.5	1	1			0.0026121	6.6298	0	1.2	0	1.2	3091700	0	0	0	3091700	0	0	0	0
P22723	P22723	2	2	2	Gamma-aminobutyric acid receptor subunit gamma-2	Gabrg2	sp|P22723|GBRG2_MOUSE Gamma-aminobutyric acid receptor subunit gamma-2 OS=Mus musculus OX=10090 GN=Gabrg2 PE=1 SV=3	1	2	2	2	1	2	0	2	1	2	0	2	1	2	0	2	4.6	4.6	4.6	55.098	474	474	1.4	3	2			0.0011074	13.288	2.1	4.6	0	4.6	41785000	4827400	16864000	0	20093000	0	14667000	0	18008000
P22892	P22892	8	8	8	AP-1 complex subunit gamma-1	Ap1g1	sp|P22892|AP1G1_MOUSE AP-1 complex subunit gamma-1 OS=Mus musculus OX=10090 GN=Ap1g1 PE=1 SV=3	1	8	8	8	1	5	1	5	1	5	1	5	1	5	1	5	8.5	8.5	8.5	91.349	822	822	1.31	10	2	1		0	48.1	1.1	5.1	1.1	5.6	176470000	4157200	65661000	13977000	92672000	0	34571000	0	36211000
P23116	P23116	7	7	7	Eukaryotic translation initiation factor 3 subunit A	Eif3a	sp|P23116|EIF3A_MOUSE Eukaryotic translation initiation factor 3 subunit A OS=Mus musculus OX=10090 GN=Eif3a PE=1 SV=5	1	7	7	7	0	5	0	5	0	5	0	5	0	5	0	5	6.1	6.1	6.1	161.93	1344	1344	1	10				0	41.739	0	4.4	0	4.2	132630000	0	78652000	0	53978000	0	21267000	0	23153000
P23198	P23198	2	2	2	Chromobox protein homolog 3	Cbx3	sp|P23198|CBX3_MOUSE Chromobox protein homolog 3 OS=Mus musculus OX=10090 GN=Cbx3 PE=1 SV=2	1	2	2	2	1	1	0	0	1	1	0	0	1	1	0	0	14.8	14.8	14.8	20.855	183	183	3			2		0.0011025	13.221	7.1	7.7	0	0	44430000	12501000	31929000	0	0	0	0	0	0
P23242	P23242	1	1	1	Gap junction alpha-1 protein	Gja1	sp|P23242|CXA1_MOUSE Gap junction alpha-1 protein OS=Mus musculus OX=10090 GN=Gja1 PE=1 SV=2	1	1	1	1	0	1	0	1	0	1	0	1	0	1	0	1	5.2	5.2	5.2	43.004	382	382	1	2				0.0058749	6.339	0	5.2	0	5.2	43443000	0	18812000	0	24631000	0	0	0	0
P23492	P23492	2	2	2	Purine nucleoside phosphorylase	Pnp	sp|P23492|PNPH_MOUSE Purine nucleoside phosphorylase OS=Mus musculus OX=10090 GN=Pnp PE=1 SV=2	1	2	2	2	2	1	0	1	2	1	0	1	2	1	0	1	6.9	6.9	6.9	32.277	289	289	3			4		0.00098765	11.699	6.9	3.8	0	3.1	22439000	10083000	8525600	0	3829900	0	0	0	0
P23506	P23506	8	8	8	Protein-L-isoaspartate(D-aspartate) O-methyltransferase	Pcmt1	sp|P23506|PIMT_MOUSE Protein-L-isoaspartate(D-aspartate) O-methyltransferase OS=Mus musculus OX=10090 GN=Pcmt1 PE=1 SV=3	1	8	8	8	3	8	6	3	3	8	6	3	3	8	6	3	37	37	37	24.634	227	227	3.17			24	5	0	161.53	15.4	37	21.6	11.5	1579200000	621400000	407070000	448730000	102000000	629690000	406320000	488460000	241970000
P23780	P23780	2	2	2	Beta-galactosidase	Glb1	sp|P23780|BGAL_MOUSE Beta-galactosidase OS=Mus musculus OX=10090 GN=Glb1 PE=1 SV=1	1	2	2	2	0	0	1	1	0	0	1	1	0	0	1	1	3.4	3.4	3.4	73.12	647	647	2		2			0.00099404	11.755	0	0	1.5	1.9	14645000	0	0	4376500	10268000	0	0	0	0
P23818	P23818	7	3	3	Glutamate receptor 1	Gria1	sp|P23818|GRIA1_MOUSE Glutamate receptor 1 OS=Mus musculus OX=10090 GN=Gria1 PE=1 SV=1	1	7	3	3	1	6	0	4	0	3	0	2	0	3	0	2	9.2	4.1	4.1	101.57	907	907	1.17	5	1			0.00125	17.934	1	7.4	0	5.3	95323000	0	69375000	0	25948000	0	35030000	0	22073000
P23819	P23819	22	22	18	Glutamate receptor 2	Gria2	sp|P23819|GRIA2_MOUSE Glutamate receptor 2 OS=Mus musculus OX=10090 GN=Gria2 PE=1 SV=3	1	22	22	18	3	20	3	11	3	20	3	11	2	17	3	9	27.7	27.7	22.5	98.661	883	883	1.33	39	2	7		0	152.19	3.6	25.8	3.9	12.9	1250800000	37247000	799340000	58684000	355580000	30485000	128060000	29827000	81971000
P23927	P23927	7	7	7	Alpha-crystallin B chain	Cryab	sp|P23927|CRYAB_MOUSE Alpha-crystallin B chain OS=Mus musculus OX=10090 GN=Cryab PE=1 SV=2	1	7	7	7	1	7	2	3	1	7	2	3	1	7	2	3	37.7	37.7	37.7	20.069	175	175	3.43			8	6	0	44.303	6.3	37.7	10.9	18.3	240910000	20973000	179860000	17932000	22148000	0	127000000	47236000	60460000
P24270	P24270	2	2	2	Catalase	Cat	sp|P24270|CATA_MOUSE Catalase OS=Mus musculus OX=10090 GN=Cat PE=1 SV=4	1	2	2	2	0	0	0	2	0	0	0	2	0	0	0	2	4.7	4.7	4.7	59.795	527	527	2		2			0.00096665	11.551	0	0	0	4.7	19690000	0	0	0	19690000	0	0	0	0
P24288	P24288	5	5	5	Branched-chain-amino-acid aminotransferase, cytosolic	Bcat1	sp|P24288|BCAT1_MOUSE Branched-chain-amino-acid aminotransferase, cytosolic OS=Mus musculus OX=10090 GN=Bcat1 PE=1 SV=2	1	5	5	5	1	0	4	5	1	0	4	5	1	0	4	5	14.8	14.8	14.8	42.791	386	386	2.1		9	1		0	30.977	3.4	0	10.9	14.8	126040000	12922000	0	45099000	68015000	0	0	18001000	20544000
P24369	P24369	6	6	6	Peptidyl-prolyl cis-trans isomerase B	Ppib	sp|P24369|PPIB_MOUSE Peptidyl-prolyl cis-trans isomerase B OS=Mus musculus OX=10090 GN=Ppib PE=1 SV=2	1	6	6	6	4	6	3	3	4	6	3	3	4	6	3	3	31.9	31.9	31.9	23.713	216	216	3.61			7	11	0	41.556	21.8	31.9	14.4	14.4	296530000	75506000	134140000	44774000	42108000	163740000	121710000	182800000	202560000
P24472;P30115;P13745	P24472	5;1;1	5;1;1	5;1;1	Glutathione S-transferase A4	Gsta4	sp|P24472|GSTA4_MOUSE Glutathione S-transferase A4 OS=Mus musculus OX=10090 GN=Gsta4 PE=1 SV=3	3	5	5	5	5	4	4	4	5	4	4	4	5	4	4	4	22.5	22.5	22.5	25.564	222	222;221;223	3.05			18	1	0	50.037	22.5	18.5	18.9	18.9	643610000	206890000	187290000	153750000	95686000	222490000	227900000	131530000	179570000
P24527	P24527	8	8	8	Leukotriene A-4 hydrolase	Lta4h	sp|P24527|LKHA4_MOUSE Leukotriene A-4 hydrolase OS=Mus musculus OX=10090 GN=Lta4h PE=1 SV=4	1	8	8	8	2	0	5	6	2	0	5	6	2	0	5	6	15.5	15.5	15.5	69.05	611	611	2.15		11	2		0	55.92	3.8	0	9.2	11.9	217510000	19172000	0	81767000	116570000	51314000	0	28925000	39722000
P24547	P24547	1	1	1	Inosine-5-monophosphate dehydrogenase 2	Impdh2	sp|P24547|IMDH2_MOUSE Inosine-5-monophosphate dehydrogenase 2 OS=Mus musculus OX=10090 GN=Impdh2 PE=1 SV=2	1	1	1	1	0	0	1	1	0	0	1	1	0	0	1	1	2.7	2.7	2.7	55.814	514	514	2		2			0.0054737	6.3485	0	0	2.7	2.7	11773000	0	0	5545500	6227800	0	0	0	0
P24668	P24668	2	2	2	Cation-dependent mannose-6-phosphate receptor	M6pr	sp|P24668|MPRD_MOUSE Cation-dependent mannose-6-phosphate receptor OS=Mus musculus OX=10090 GN=M6pr PE=1 SV=1	1	2	2	2	0	0	2	2	0	0	2	2	0	0	2	2	7.9	7.9	7.9	31.172	278	278	2		4			0.0010712	12.547	0	0	7.9	7.9	63404000	0	0	28138000	35266000	0	0	24501000	26406000
P25444	P25444	8	8	8	40S ribosomal protein S2	Rps2	sp|P25444|RS2_MOUSE 40S ribosomal protein S2 OS=Mus musculus OX=10090 GN=Rps2 PE=1 SV=3	1	8	8	8	3	7	4	5	3	7	4	5	3	7	4	5	30.7	30.7	30.7	31.231	293	293	2.87	1	2	19	1	0	77.606	14	27	16	21.8	820550000	158460000	412910000	104460000	144720000	227380000	230800000	113340000	182740000
P26039	P26039	4	2	2	Talin-1	Tln1	sp|P26039|TLN1_MOUSE Talin-1 OS=Mus musculus OX=10090 GN=Tln1 PE=1 SV=2	1	4	2	2	0	3	1	2	0	1	0	1	0	1	0	1	1.8	0.9	0.9	269.82	2541	2541	1	2				0.0014218	11.38	0	1.3	0.4	0.9	19494000	0	5314100	0	14180000	0	0	0	0
P26040	P26040	8	8	4	Ezrin	Ezr	sp|P26040|EZRI_MOUSE Ezrin OS=Mus musculus OX=10090 GN=Ezr PE=1 SV=3	1	8	8	4	1	7	3	5	1	7	3	5	0	3	0	3	11.9	11.9	7.2	69.406	586	586	1.28	13	5			0	54.492	1.7	10.6	3.4	8.2	413460000	5868600	200800000	69889000	136900000	0	57595000	53187000	48703000
P26041;P26043	P26041;P26043	8;5	4;1	4;1	Moesin;Radixin	Msn;Rdx	sp|P26041|MOES_MOUSE Moesin OS=Mus musculus OX=10090 GN=Msn PE=1 SV=3;sp|P26043|RADI_MOUSE Radixin OS=Mus musculus OX=10090 GN=Rdx PE=1 SV=3	2	8	4	4	1	6	4	5	0	2	1	3	0	2	1	3	12.5	7.6	7.6	67.766	577	577;583	1.67	2	4			0.00073855	23.762	1.7	8	5.2	9.2	75600000	0	28372000	9100300	38128000	0	0	0	0
P26443	P26443	20	20	20	Glutamate dehydrogenase 1, mitochondrial	Glud1	sp|P26443|DHE3_MOUSE Glutamate dehydrogenase 1, mitochondrial OS=Mus musculus OX=10090 GN=Glud1 PE=1 SV=1	1	20	20	20	16	15	18	18	16	15	18	18	16	15	18	18	39.6	39.6	39.6	61.336	558	558	2.44	6	60	44	7	0	267.83	34.2	33	38	36.7	8991400000	1968200000	887600000	2752900000	3382700000	1008700000	614950000	598870000	679170000
P26516	P26516	3	3	3	26S proteasome non-ATPase regulatory subunit 7	Psmd7	sp|P26516|PSMD7_MOUSE 26S proteasome non-ATPase regulatory subunit 7 OS=Mus musculus OX=10090 GN=Psmd7 PE=1 SV=2	1	3	3	3	0	0	1	3	0	0	1	3	0	0	1	3	11.2	11.2	11.2	36.539	321	321	2		4			0.0013324	19.098	0	0	3.4	11.2	48554000	0	0	12807000	35747000	0	0	0	0
P26638	P26638	7	7	7	Serine--tRNA ligase, cytoplasmic	Sars	sp|P26638|SYSC_MOUSE Serine--tRNA ligase, cytoplasmic OS=Mus musculus OX=10090 GN=Sars1 PE=1 SV=3	1	7	7	7	2	1	5	6	2	1	5	6	2	1	5	6	18.2	18.2	18.2	58.388	512	512	2		14			0	45.342	4.7	2.9	11.1	15.8	569630000	26947000	11896000	201880000	328900000	127130000	0	89569000	99555000
P26645	P26645	5	5	5	Myristoylated alanine-rich C-kinase substrate	Marcks	sp|P26645|MARCS_MOUSE Myristoylated alanine-rich C-kinase substrate OS=Mus musculus OX=10090 GN=Marcks PE=1 SV=2	1	5	5	5	1	4	2	3	1	4	2	3	1	4	2	3	18.1	18.1	18.1	29.661	309	309	1.42	7	5			0	86.71	4.9	12.6	11	16.5	703190000	66114000	194230000	186530000	256310000	0	112870000	184380000	162710000
P26883	P26883	2	2	2	Peptidyl-prolyl cis-trans isomerase FKBP1A	Fkbp1a	sp|P26883|FKB1A_MOUSE Peptidyl-prolyl cis-trans isomerase FKBP1A OS=Mus musculus OX=10090 GN=Fkbp1a PE=1 SV=2	1	2	2	2	2	2	2	1	2	2	2	1	2	2	2	1	25	25	25	11.922	108	108	3.63	2		1	16	0	54.71	25	25	25	12	2449300000	606000000	1239500000	316270000	287500000	1750800000	1254000000	1439700000	1775400000
P27048;P63163	P27048;P63163	2;2	2;2	2;2	Small nuclear ribonucleoprotein-associated protein B;Small nuclear ribonucleoprotein-associated protein N	Snrpb;Snrpn	sp|P27048|RSMB_MOUSE Small nuclear ribonucleoprotein-associated protein B OS=Mus musculus OX=10090 GN=Snrpb PE=1 SV=1;sp|P63163|RSMN_MOUSE Small nuclear ribonucleoprotein-associated protein N OS=Mus musculus OX=10090 GN=Snrpn PE=1 SV=1	2	2	2	2	1	2	2	0	1	2	2	0	1	2	2	0	6.9	6.9	6.9	23.656	231	231;240	3.17			5	1	0.0010672	12.483	3.5	6.9	6.9	0	132840000	31319000	52901000	48623000	0	0	110150000	103950000	0
P27546	P27546	4	4	4	Microtubule-associated protein 4	Map4	sp|P27546|MAP4_MOUSE Microtubule-associated protein 4 OS=Mus musculus OX=10090 GN=Map4 PE=1 SV=3	1	4	4	4	0	4	2	2	0	4	2	2	0	4	2	2	4.7	4.7	4.7	117.43	1125	1125	1.7	5	3	2		0	29.02	0	4.7	2	2.1	138720000	0	75702000	27785000	35228000	0	44872000	31328000	34845000
P27601	P27601	2	2	2	Guanine nucleotide-binding protein subunit alpha-13	Gna13	sp|P27601|GNA13_MOUSE Guanine nucleotide-binding protein subunit alpha-13 OS=Mus musculus OX=10090 GN=Gna13 PE=1 SV=1	1	2	2	2	0	0	2	1	0	0	2	1	0	0	2	1	5.3	5.3	5.3	44.054	377	377	2		3			0.0011541	15.429	0	0	5.3	2.7	55188000	0	0	38056000	17132000	0	0	0	0
P27612	P27612	4	4	4	Phospholipase A-2-activating protein	Plaa	sp|P27612|PLAP_MOUSE Phospholipase A-2-activating protein OS=Mus musculus OX=10090 GN=Plaa PE=1 SV=4	1	4	4	4	0	3	0	2	0	3	0	2	0	3	0	2	5.7	5.7	5.7	87.22	794	794	1	5				0.00072833	23.297	0	4.5	0	2.6	37190000	0	27828000	0	9362300	0	0	0	0
P27659	P27659	3	3	3	60S ribosomal protein L3	Rpl3	sp|P27659|RL3_MOUSE 60S ribosomal protein L3 OS=Mus musculus OX=10090 GN=Rpl3 PE=1 SV=3	1	3	3	3	0	1	0	2	0	1	0	2	0	1	0	2	8.9	8.9	8.9	46.109	403	403	1.33	2	1			0.0012195	17.657	0	4	0	5	34158000	0	7647600	0	26510000	0	0	0	0
P27661;Q64522	P27661;Q64522	3;2	1;1	1;1	Histone H2AX;Histone H2A type 2-B	H2afx;Hist2h2ab	sp|P27661|H2AX_MOUSE Histone H2AX OS=Mus musculus OX=10090 GN=H2ax PE=1 SV=2;sp|Q64522|H2A2B_MOUSE Histone H2A type 2-B OS=Mus musculus OX=10090 GN=H2ac21 PE=1 SV=3	2	3	1	1	2	3	2	2	0	1	0	0	0	1	0	0	27.3	16.1	16.1	15.142	143	143;130	4				1	0	73.928	11.2	27.3	11.2	11.2	288820000	0	288820000	0	0	0	0	0	0
P27671	P27671	2	2	2	Ras-specific guanine nucleotide-releasing factor 1	Rasgrf1	sp|P27671|RGRF1_MOUSE Ras-specific guanine nucleotide-releasing factor 1 OS=Mus musculus OX=10090 GN=Rasgrf1 PE=1 SV=2	1	2	2	2	0	2	0	0	0	2	0	0	0	2	0	0	2.1	2.1	2.1	144.1	1262	1262	1	2				0.0010137	11.939	0	2.1	0	0	19858000	0	19858000	0	0	0	0	0	0
P27773	P27773	21	21	21	Protein disulfide-isomerase A3	Pdia3	sp|P27773|PDIA3_MOUSE Protein disulfide-isomerase A3 OS=Mus musculus OX=10090 GN=Pdia3 PE=1 SV=2	1	21	21	21	5	3	17	18	5	3	17	18	5	3	17	18	46.1	46.1	46.1	56.678	505	505	2.04		44	2		0	191.12	8.9	7.1	39.6	43.4	2266900000	50752000	40652000	1098300000	1077100000	63155000	51288000	186190000	226210000
P28271;Q811J3	P28271	3;1	3;1	3;1	Cytoplasmic aconitate hydratase	Aco1	sp|P28271|ACOHC_MOUSE Cytoplasmic aconitate hydratase OS=Mus musculus OX=10090 GN=Aco1 PE=1 SV=3	2	3	3	3	0	3	0	1	0	3	0	1	0	3	0	1	3.7	3.7	3.7	98.124	889	889;963	1	4				0.0012173	17.633	0	3.7	0	0.9	34465000	0	26851000	0	7614500	0	0	0	0
P28352	P28352	2	2	2	DNA-(apurinic or apyrimidinic site) lyase;DNA-(apurinic or apyrimidinic site) lyase, mitochondrial	Apex1	sp|P28352|APEX1_MOUSE DNA-(apurinic or apyrimidinic site) endonuclease OS=Mus musculus OX=10090 GN=Apex1 PE=1 SV=2	1	2	2	2	0	0	2	0	0	0	2	0	0	0	2	0	6.3	6.3	6.3	35.49	317	317	3			2		0.0014382	11.484	0	0	6.3	0	22544000	0	0	22544000	0	0	0	0	0
P28650	P28650	5	5	4	Adenylosuccinate synthetase isozyme 1	Adssl1	sp|P28650|PURA1_MOUSE Adenylosuccinate synthetase isozyme 1 OS=Mus musculus OX=10090 GN=Adss1 PE=1 SV=2	1	5	5	4	0	0	1	5	0	0	1	5	0	0	1	4	15.3	15.3	12.3	50.254	457	457	2		6			0	39.201	0	0	2.6	15.3	81006000	0	0	4996400	76009000	0	0	0	0
P28652	P28652	15	10	5	Calcium/calmodulin-dependent protein kinase type II subunit beta	Camk2b	sp|P28652|KCC2B_MOUSE Calcium/calmodulin-dependent protein kinase type II subunit beta OS=Mus musculus OX=10090 GN=Camk2b PE=1 SV=2	1	15	10	5	10	11	13	12	5	6	8	7	2	3	3	4	30.6	21.2	14.8	60.46	542	542	2.28	6	26	11	4	0	323.31	18.1	21.6	22.9	25.8	4310200000	388980000	376630000	1740300000	1804400000	449110000	133930000	552220000	489450000
P28656	P28656	7	7	6	Nucleosome assembly protein 1-like 1	Nap1l1	sp|P28656|NP1L1_MOUSE Nucleosome assembly protein 1-like 1 OS=Mus musculus OX=10090 GN=Nap1l1 PE=1 SV=2	1	7	7	6	4	3	5	5	4	3	5	5	3	2	4	4	17.6	17.6	15.1	45.345	391	391	2.45		14	6	2	0	42.973	10	11.5	13	10.2	561520000	103650000	34707000	214010000	209160000	141490000	63241000	89176000	94070000
P28658	P28658	6	6	6	Ataxin-10	Atxn10	sp|P28658|ATX10_MOUSE Ataxin-10 OS=Mus musculus OX=10090 GN=Atxn10 PE=1 SV=2	1	6	6	6	0	0	3	3	0	0	3	3	0	0	3	3	15.6	15.6	15.6	53.706	475	475	2		6			0	37.859	0	0	8.6	6.9	85010000	0	0	40757000	44253000	0	0	0	0
P28660;Q8K1X4	P28660	26;2	26;2	26;2	Nck-associated protein 1	Nckap1	sp|P28660|NCKP1_MOUSE Nck-associated protein 1 OS=Mus musculus OX=10090 GN=Nckap1 PE=1 SV=2	2	26	26	26	2	21	10	19	2	21	10	19	2	21	10	19	21.4	21.4	21.4	128.78	1128	1128;1134	1.23	50	7	2	1	0	179.4	2.1	17.9	8.2	16	1523300000	61249000	809740000	148920000	503420000	0	96911000	87490000	87323000
P28661	P28661	4	2	2	Septin-4	Sept4	sp|P28661|SEPT4_MOUSE Septin-4 OS=Mus musculus OX=10090 GN=Septin4 PE=1 SV=1	1	4	2	2	0	0	0	4	0	0	0	2	0	0	0	2	8.8	5.2	5.2	54.935	478	478	2		2			0.0010718	12.561	0	0	0	8.8	42340000	0	0	0	42340000	0	0	0	0
P28663	P28663	19	19	16	Beta-soluble NSF attachment protein	Napb	sp|P28663|SNAB_MOUSE Beta-soluble NSF attachment protein OS=Mus musculus OX=10090 GN=Napb PE=1 SV=2	1	19	19	16	10	18	16	12	10	18	16	12	8	15	13	10	58.4	58.4	47	33.557	298	298	3.01			74	1	0	323.31	45	52.3	51.7	53.7	8662600000	886850000	3528600000	3446300000	800830000	888700000	1531500000	1298700000	1177000000
P28665;P28666	P28665;P28666	2;2	2;2	2;2	Murinoglobulin-1;Murinoglobulin-2	Mug1;Mug2	sp|P28665|MUG1_MOUSE Murinoglobulin-1 OS=Mus musculus OX=10090 GN=Mug1 PE=1 SV=3;sp|P28666|MUG2_MOUSE Murinoglobulin-2 OS=Mus musculus OX=10090 GN=Mug2 PE=1 SV=2	2	2	2	2	0	2	0	0	0	2	0	0	0	2	0	0	1.2	1.2	1.2	165.3	1476	1476;1451	1	2				0.0010163	11.966	0	1.2	0	0	12639000	0	12639000	0	0	0	0	0	0
P28738;P33175	P28738	17;7	17;7	13;3	Kinesin heavy chain isoform 5C	Kif5c	sp|P28738|KIF5C_MOUSE Kinesin heavy chain isoform 5C OS=Mus musculus OX=10090 GN=Kif5c PE=1 SV=3	2	17	17	13	0	17	7	11	0	17	7	11	0	13	4	8	21.2	21.2	16.4	109.27	956	956;1027	1.08	35	3			0	156.11	0	21.2	9	13.1	770230000	0	462840000	100050000	207350000	0	71630000	70535000	67492000
P28740;Q922S8	P28740	12;1	12;1	12;1	Kinesin-like protein KIF2A	Kif2a	sp|P28740|KIF2A_MOUSE Kinesin-like protein KIF2A OS=Mus musculus OX=10090 GN=Kif2a PE=1 SV=2	2	12	12	12	1	11	3	8	1	11	3	8	1	11	3	8	16.6	16.6	16.6	79.755	705	705;721	1.46	19	4	1	2	0	78.566	1.1	15.3	3.8	11.8	360640000	10592000	203610000	18424000	128020000	0	50769000	19160000	30361000
P28741	P28741	2	2	1	Kinesin-like protein KIF3A	Kif3a	sp|P28741|KIF3A_MOUSE Kinesin-like protein KIF3A OS=Mus musculus OX=10090 GN=Kif3a PE=1 SV=2	1	2	2	1	0	2	0	1	0	2	0	1	0	1	0	0	3	3	1.4	80.169	701	701	1	3				0.0011675	16.774	0	3	0	1.6	18494000	0	15671000	0	2822700	0	0	0	0
P28867	P28867	3	3	3	Protein kinase C delta type;Protein kinase C delta type regulatory subunit;Protein kinase C delta type catalytic subunit	Prkcd	sp|P28867|KPCD_MOUSE Protein kinase C delta type OS=Mus musculus OX=10090 GN=Prkcd PE=1 SV=3	1	3	3	3	0	2	0	1	0	2	0	1	0	2	0	1	4.2	4.2	4.2	77.546	674	674	1.5	2	2			0.001224	17.679	0	3	0	1.2	22928000	0	16033000	0	6895400	0	0	0	0
P29341	P29341	15	15	15	Polyadenylate-binding protein 1	Pabpc1	sp|P29341|PABP1_MOUSE Polyadenylate-binding protein 1 OS=Mus musculus OX=10090 GN=Pabpc1 PE=1 SV=2	1	15	15	15	2	2	8	13	2	2	8	13	2	2	8	13	24.7	24.7	24.7	70.67	636	636	2	2	23	2		0	96.117	3.6	2.7	14.2	23.3	724110000	25181000	16340000	232390000	450200000	0	0	68204000	85059000
P29387	P29387	6	2	2	Guanine nucleotide-binding protein subunit beta-4	Gnb4	sp|P29387|GBB4_MOUSE Guanine nucleotide-binding protein subunit beta-4 OS=Mus musculus OX=10090 GN=Gnb4 PE=1 SV=4	1	6	2	2	3	5	5	4	0	1	1	0	0	1	1	0	15.6	5.3	5.3	37.379	340	340	3			2		0.0010325	12.131	8.2	13.5	12.4	10.3	19435000	0	10449000	8986100	0	0	0	0	0
P29391;P49945	P29391;P49945	2;1	2;1	2;1	Ferritin light chain 1;Ferritin light chain 2	Ftl1;Ftl2	sp|P29391|FRIL1_MOUSE Ferritin light chain 1 OS=Mus musculus OX=10090 GN=Ftl1 PE=1 SV=2;sp|P49945|FRIL2_MOUSE Ferritin light chain 2 OS=Mus musculus OX=10090 GN=Ftl2 PE=3 SV=2	2	2	2	2	0	2	0	0	0	2	0	0	0	2	0	0	11.5	11.5	11.5	20.802	183	183;183	3			2		0.001003	11.838	0	11.5	0	0	38616000	0	38616000	0	0	0	0	0	0
P29533	P29533	2	2	2	Vascular cell adhesion protein 1	Vcam1	sp|P29533|VCAM1_MOUSE Vascular cell adhesion protein 1 OS=Mus musculus OX=10090 GN=Vcam1 PE=1 SV=1	1	2	2	2	0	0	0	2	0	0	0	2	0	0	0	2	2.6	2.6	2.6	81.317	739	739	1	2				0.0013857	11.027	0	0	0	2.6	8282200	0	0	0	8282200	0	0	0	0
P29758	P29758	8	8	8	Ornithine aminotransferase, mitochondrial	Oat	sp|P29758|OAT_MOUSE Ornithine aminotransferase, mitochondrial OS=Mus musculus OX=10090 GN=Oat PE=1 SV=1	1	8	8	8	4	1	7	5	4	1	7	5	4	1	7	5	24.8	24.8	24.8	48.354	439	439	2.5		12	6	2	0	72.829	10.7	2.1	22.6	15.5	355560000	65118000	6747500	175410000	108290000	77596000	0	47373000	35519000
P30275;Q6P8J7	P30275	9;1	9;1	9;1	Creatine kinase U-type, mitochondrial	Ckmt1	sp|P30275|KCRU_MOUSE Creatine kinase U-type, mitochondrial OS=Mus musculus OX=10090 GN=Ckmt1 PE=1 SV=1	2	9	9	9	6	4	9	8	6	4	9	8	6	4	9	8	17.9	17.9	17.9	47.003	418	418;419	2.29	6	30	11	5	0	114.1	13.9	10.5	17.9	17.7	5731800000	1395000000	375370000	1994100000	1967300000	1289300000	898150000	782120000	764660000
P30416	P30416	5	5	5	Peptidyl-prolyl cis-trans isomerase FKBP4;Peptidyl-prolyl cis-trans isomerase FKBP4, N-terminally processed	Fkbp4	sp|P30416|FKBP4_MOUSE Peptidyl-prolyl cis-trans isomerase FKBP4 OS=Mus musculus OX=10090 GN=Fkbp4 PE=1 SV=5	1	5	5	5	0	1	2	3	0	1	2	3	0	1	2	3	14.6	14.6	14.6	51.572	458	458	2		6			0	31.297	0	3.3	7.4	7.2	74780000	0	1566500	23723000	49491000	0	0	0	0
P30999	P30999	7	7	7	Catenin delta-1	Ctnnd1	sp|P30999|CTND1_MOUSE Catenin delta-1 OS=Mus musculus OX=10090 GN=Ctnnd1 PE=1 SV=2	1	7	7	7	1	7	1	4	1	7	1	4	1	7	1	4	9.3	9.3	9.3	104.92	938	938	1.23	11	1	1		0	42.89	1.3	9.3	1.3	5.3	120920000	5728300	75045000	5384600	34766000	0	16521000	0	17112000
P31230	P31230	1	1	1	Aminoacyl tRNA synthase complex-interacting multifunctional protein 1;Endothelial monocyte-activating polypeptide 2	Aimp1	sp|P31230|AIMP1_MOUSE Aminoacyl tRNA synthase complex-interacting multifunctional protein 1 OS=Mus musculus OX=10090 GN=Aimp1 PE=1 SV=2	1	1	1	1	0	0	1	1	0	0	1	1	0	0	1	1	3.9	3.9	3.9	33.997	310	310	2		2			0.0013526	7.4232	0	0	3.9	3.9	31245000	0	0	16531000	14715000	0	0	0	0
P31324	P31324	9	9	7	cAMP-dependent protein kinase type II-beta regulatory subunit	Prkar2b	sp|P31324|KAP3_MOUSE cAMP-dependent protein kinase type II-beta regulatory subunit OS=Mus musculus OX=10090 GN=Prkar2b PE=1 SV=3	1	9	9	7	2	1	6	8	2	1	6	8	1	0	4	6	30.5	30.5	23.6	46.167	416	416	2.11		16	2		0	68.524	8.4	3.6	21.6	26.7	1283100000	120570000	29954000	531700000	600860000	235400000	0	272480000	306990000
P31648	P31648	4	4	4	Sodium- and chloride-dependent GABA transporter 1	Slc6a1	sp|P31648|SC6A1_MOUSE Sodium- and chloride-dependent GABA transporter 1 OS=Mus musculus OX=10090 GN=Slc6a1 PE=1 SV=2	1	4	4	4	1	2	1	4	1	2	1	4	1	2	1	4	10	10	10	67.001	599	599	1.44	5	4			0	39.921	3.5	5.5	3.5	10	1271800000	159240000	329970000	161320000	621230000	0	321880000	0	337870000
P31650	P31650	5	5	5	Sodium- and chloride-dependent GABA transporter 3	Slc6a11	sp|P31650|S6A11_MOUSE Sodium- and chloride-dependent GABA transporter 3 OS=Mus musculus OX=10090 GN=Slc6a11 PE=1 SV=2	1	5	5	5	2	4	4	4	2	4	4	4	2	4	4	4	9.3	9.3	9.3	69.96	627	627	1.45	12	10			0	41.162	2.9	7.2	6.9	6.9	687510000	64519000	181920000	149240000	291830000	191970000	75139000	91828000	82360000
P31786	P31786	3	3	3	Acyl-CoA-binding protein	Dbi	sp|P31786|ACBP_MOUSE Acyl-CoA-binding protein OS=Mus musculus OX=10090 GN=Dbi PE=1 SV=2	1	3	3	3	3	2	0	0	3	2	0	0	3	2	0	0	55.2	55.2	55.2	10	87	87	4				5	0	44.181	55.2	36.8	0	0	424340000	198480000	225860000	0	0	0	0	0	0
P31938	P31938	13	13	9	Dual specificity mitogen-activated protein kinase kinase 1	Map2k1	sp|P31938|MP2K1_MOUSE Dual specificity mitogen-activated protein kinase kinase 1 OS=Mus musculus OX=10090 GN=Map2k1 PE=1 SV=2	1	13	13	9	6	3	10	11	6	3	10	11	3	1	7	7	36.1	36.1	28.5	43.474	393	393	2.31		29	8	2	0	129.4	16	8.1	31	28	1632800000	189560000	39961000	711120000	692200000	192880000	118640000	184050000	151200000
P32020	P32020	4	4	4	Non-specific lipid-transfer protein	Scp2	sp|P32020|SCP2_MOUSE Sterol carrier protein 2 OS=Mus musculus OX=10090 GN=Scp2 PE=1 SV=3	1	4	4	4	0	3	1	0	0	3	1	0	0	3	1	0	5.3	5.3	5.3	59.125	547	547	4				4	0.00073475	23.535	0	5.1	2.2	0	81536000	0	49676000	31860000	0	0	0	0	0
P32037	P32037	5	5	5	Solute carrier family 2, facilitated glucose transporter member 3	Slc2a3	sp|P32037|GTR3_MOUSE Solute carrier family 2, facilitated glucose transporter member 3 OS=Mus musculus OX=10090 GN=Slc2a3 PE=1 SV=1	1	5	5	5	1	4	2	5	1	4	2	5	1	4	2	5	8.3	8.3	8.3	53.478	493	493	1.5	8	8			0	40.582	2.2	7.1	2.4	8.3	350180000	13250000	113370000	64324000	159240000	0	42248000	45831000	48676000
P32067	P32067	2	2	2	Lupus La protein homolog	Ssb	sp|P32067|LA_MOUSE Lupus La protein homolog OS=Mus musculus OX=10090 GN=Ssb PE=1 SV=1	1	2	2	2	0	0	1	1	0	0	1	1	0	0	1	1	6	6	6	47.756	415	415	2		2			0.00098619	11.697	0	0	3.4	2.7	22890000	0	0	13181000	9708800	0	0	0	0
P32848	P32848	3	3	3	Parvalbumin alpha	Pvalb	sp|P32848|PRVA_MOUSE Parvalbumin alpha OS=Mus musculus OX=10090 GN=Pvalb PE=1 SV=3	1	3	3	3	1	2	0	0	1	2	0	0	1	2	0	0	37.3	37.3	37.3	11.93	110	110	4				3	0.0013624	19.711	11.8	25.5	0	0	69160000	20611000	48549000	0	0	0	0	0	0
P32883	P32883	4	1	1	GTPase KRas;GTPase KRas, N-terminally processed	Kras	sp|P32883|RASK_MOUSE GTPase KRas OS=Mus musculus OX=10090 GN=Kras PE=1 SV=1	1	4	1	1	2	4	3	2	0	1	1	0	0	1	1	0	30.7	4.8	4.8	21.656	189	189	3.5			1	1	0.0017778	6.9403	12.2	30.7	16.9	12.2	43460000	0	12721000	30739000	0	0	0	0	0
P32921	P32921	6	6	6	Tryptophan--tRNA ligase, cytoplasmic;T1-TrpRS;T2-TrpRS	Wars	sp|P32921|SYWC_MOUSE Tryptophan--tRNA ligase, cytoplasmic OS=Mus musculus OX=10090 GN=Wars1 PE=1 SV=2	1	6	6	6	1	0	0	5	1	0	0	5	1	0	0	5	16.2	16.2	16.2	54.357	481	481	2.17		5	1		0	36.031	1.9	0	0	14.3	101990000	3996300	0	0	97995000	0	0	0	0
P33173;Q60575;O35071	P33173	15;3;1	15;3;1	15;3;1	Kinesin-like protein KIF1A	Kif1a	sp|P33173|KIF1A_MOUSE Kinesin-like protein KIF1A OS=Mus musculus OX=10090 GN=Kif1a PE=1 SV=2	3	15	15	15	0	14	1	9	0	14	1	9	0	14	1	9	9.9	9.9	9.9	191.72	1695	1695;1816;1100	1	24				0	94.242	0	9.2	0.5	5.4	339000000	0	240140000	3797300	95060000	0	35265000	0	33159000
P34022	P34022	5	5	5	Ran-specific GTPase-activating protein	Ranbp1	sp|P34022|RANG_MOUSE Ran-specific GTPase-activating protein OS=Mus musculus OX=10090 GN=Ranbp1 PE=1 SV=2	1	5	5	5	2	4	4	2	2	4	4	2	2	4	4	2	20.7	20.7	20.7	23.596	203	203	3			12		0	39.057	8.9	20.7	20.7	10.8	546810000	54810000	212120000	207920000	71972000	0	276740000	189180000	231250000
P34152	P34152	4	3	3	Focal adhesion kinase 1	Ptk2	sp|P34152|FAK1_MOUSE Focal adhesion kinase 1 OS=Mus musculus OX=10090 GN=Ptk2 PE=1 SV=4	1	4	3	3	1	3	1	2	1	2	0	1	1	2	0	1	3.8	3	3	119.24	1052	1052	1.5	3		1		0.00123	17.721	1	2.9	0.8	1.7	33057000	5932200	22780000	0	4345100	0	0	0	0
P34884	P34884	3	3	3	Macrophage migration inhibitory factor	Mif	sp|P34884|MIF_MOUSE Macrophage migration inhibitory factor OS=Mus musculus OX=10090 GN=Mif PE=1 SV=2	1	3	3	3	2	2	1	3	2	2	1	3	2	2	1	3	35.7	35.7	35.7	12.504	115	115	4				19	0	243.84	27.8	27.8	9.6	35.7	1236200000	330340000	664280000	72290000	169270000	459640000	438570000	280920000	395250000
P34914	P34914	1	1	1	Bifunctional epoxide hydrolase 2;Cytosolic epoxide hydrolase 2;Lipid-phosphate phosphatase	Ephx2	sp|P34914|HYES_MOUSE Bifunctional epoxide hydrolase 2 OS=Mus musculus OX=10090 GN=Ephx2 PE=1 SV=2	1	1	1	1	0	0	1	1	0	0	1	1	0	0	1	1	1.6	1.6	1.6	62.515	554	554	2		2			0.0021911	6.7101	0	0	1.6	1.6	9542700	0	0	4802900	4739800	0	0	0	0
P35235	P35235	6	6	6	Tyrosine-protein phosphatase non-receptor type 11	Ptpn11	sp|P35235|PTN11_MOUSE Tyrosine-protein phosphatase non-receptor type 11 OS=Mus musculus OX=10090 GN=Ptpn11 PE=1 SV=3	1	6	6	6	0	0	3	3	0	0	3	3	0	0	3	3	10.6	10.6	10.6	68.034	593	593	2		6			0	36.121	0	0	6.1	4.6	54016000	0	0	26675000	27341000	0	0	0	0
P35276	P35276	3	1	1	Ras-related protein Rab-3D	Rab3d	sp|P35276|RAB3D_MOUSE Ras-related protein Rab-3D OS=Mus musculus OX=10090 GN=Rab3d PE=1 SV=1	1	3	1	1	3	3	3	3	1	1	1	1	1	1	1	1	17.4	5	5	24.416	219	219	2.62	6	4	10	6	0.0011325	14.031	17.4	17.4	17.4	17.4	6308600000	1231100000	2120400000	1827200000	1130000000	0	0	0	0
P35278	P35278	6	3	3	Ras-related protein Rab-5C	Rab5c	sp|P35278|RAB5C_MOUSE Ras-related protein Rab-5C OS=Mus musculus OX=10090 GN=Rab5c PE=1 SV=2	1	6	3	3	5	6	6	5	2	3	3	2	2	3	3	2	35.6	20.8	20.8	23.412	216	216	3.08			12	1	0	27.935	26.9	35.6	35.6	26.9	634830000	103690000	272540000	185290000	73311000	202550000	288390000	233110000	183580000
P35279	P35279	10	10	3	Ras-related protein Rab-6A	Rab6a	sp|P35279|RAB6A_MOUSE Ras-related protein Rab-6A OS=Mus musculus OX=10090 GN=Rab6a PE=1 SV=4	1	10	10	3	9	9	8	7	9	9	8	7	3	2	1	1	42.3	42.3	13	23.59	208	208	2.89	4	3	43	5	0	257.31	38.9	42.3	35.1	31.7	9700900000	2256300000	3671400000	2098400000	1674800000	5843400000	5515500000	3402800000	4134900000
P35282	P35282	6	6	6	Ras-related protein Rab-21	Rab21	sp|P35282|RAB21_MOUSE Ras-related protein Rab-21 OS=Mus musculus OX=10090 GN=Rab21 PE=1 SV=4	1	6	6	6	4	5	5	3	4	5	5	3	4	5	5	3	33.8	33.8	33.8	24.106	222	222	3.05			19	1	0	321.51	23.4	29.3	27.9	17.6	342590000	54741000	152610000	100500000	34735000	68363000	95379000	55397000	81747000
P35283	P35283	7	7	7	Ras-related protein Rab-12	Rab12	sp|P35283|RAB12_MOUSE Ras-related protein Rab-12 OS=Mus musculus OX=10090 GN=Rab12 PE=1 SV=3	1	7	7	7	1	4	4	3	1	4	4	3	1	4	4	3	23.9	23.9	23.9	27.328	243	243	3			12		0	45.216	3.7	16	15.2	12.3	161670000	11035000	58938000	53181000	38513000	0	57991000	60756000	65972000
P35288	P35288	2	2	2	Ras-related protein Rab-23	Rab23	sp|P35288|RAB23_MOUSE Ras-related protein Rab-23 OS=Mus musculus OX=10090 GN=Rab23 PE=1 SV=2	1	2	2	2	0	1	0	1	0	1	0	1	0	1	0	1	12.7	12.7	12.7	26.678	237	237	3			3		0.0013895	11.113	0	6.8	0	5.9	31288000	0	22365000	0	8922600	0	0	0	0
P35293	P35293	7	7	7	Ras-related protein Rab-18	Rab18	sp|P35293|RAB18_MOUSE Ras-related protein Rab-18 OS=Mus musculus OX=10090 GN=Rab18 PE=1 SV=2	1	7	7	7	5	7	3	1	5	7	3	1	5	7	3	1	38.3	38.3	38.3	23.035	206	206	3.21			15	4	0	46.086	26.2	38.3	17	5.3	557850000	141690000	341240000	48703000	26216000	192760000	287130000	126270000	0
P35436	P35436	3	3	3	Glutamate receptor ionotropic, NMDA 2A	Grin2a	sp|P35436|NMDE1_MOUSE Glutamate receptor ionotropic, NMDA 2A OS=Mus musculus OX=10090 GN=Grin2a PE=1 SV=2	1	3	3	3	0	2	0	2	0	2	0	2	0	2	0	2	2.2	2.2	2.2	165.42	1464	1464	1	4				0.0013245	18.988	0	1.6	0	1.2	50671000	0	32979000	0	17693000	0	0	0	0
P35438	P35438	11	11	11	Glutamate receptor ionotropic, NMDA 1	Grin1	sp|P35438|NMDZ1_MOUSE Glutamate receptor ionotropic, NMDA 1 OS=Mus musculus OX=10090 GN=Grin1 PE=1 SV=1	1	11	11	11	3	8	1	6	3	8	1	6	3	8	1	6	11.5	11.5	11.5	105.48	938	938	1.33	15		3		0	68.573	3.1	8.4	1.5	7.2	359200000	22701000	219630000	11924000	104940000	30869000	50572000	0	44267000
P35486	P35486	14	14	14	Pyruvate dehydrogenase E1 component subunit alpha, somatic form, mitochondrial	Pdha1	sp|P35486|ODPA_MOUSE Pyruvate dehydrogenase E1 component subunit alpha, somatic form, mitochondrial OS=Mus musculus OX=10090 GN=Pdha1 PE=1 SV=1	1	14	14	14	8	6	7	11	8	6	7	11	8	6	7	11	28.7	28.7	28.7	43.231	390	390	2.31	9	31	19	5	0	122.76	24.1	16.4	18.2	25.6	3899500000	931650000	401270000	1140500000	1426100000	592860000	400340000	369100000	394370000
P35492	P35492	3	3	3	Histidine ammonia-lyase	Hal	sp|P35492|HUTH_MOUSE Histidine ammonia-lyase OS=Mus musculus OX=10090 GN=Hal PE=1 SV=1	1	3	3	3	0	3	0	0	0	3	0	0	0	3	0	0	4.6	4.6	4.6	72.257	657	657	1	3				0.0011827	17.121	0	4.6	0	0	18222000	0	18222000	0	0	0	0	0	0
P35505	P35505	2	2	2	Fumarylacetoacetase	Fah	sp|P35505|FAAA_MOUSE Fumarylacetoacetase OS=Mus musculus OX=10090 GN=Fah PE=1 SV=2	1	2	2	2	0	0	1	1	0	0	1	1	0	0	1	1	5	5	5	46.175	419	419	2		2			0.0014178	11.37	0	0	2.1	2.9	19849000	0	0	6890800	12959000	0	0	0	0
P35564	P35564	9	9	9	Calnexin	Canx	sp|P35564|CALX_MOUSE Calnexin OS=Mus musculus OX=10090 GN=Canx PE=1 SV=1	1	9	9	9	2	6	4	7	2	6	4	7	2	6	4	7	18.4	18.4	18.4	67.277	591	591	1.56	17	5	5		0	69.264	3.7	11.5	8	14.7	716820000	42762000	281110000	117050000	275910000	86519000	86608000	68666000	92236000
P35585;Q9WVP1	P35585	8;2	8;2	8;2	AP-1 complex subunit mu-1	Ap1m1	sp|P35585|AP1M1_MOUSE AP-1 complex subunit mu-1 OS=Mus musculus OX=10090 GN=Ap1m1 PE=1 SV=3	2	8	8	8	0	0	4	4	0	0	4	4	0	0	4	4	21	21	21	48.542	423	423;423	2		8			0	57.319	0	0	10.2	10.9	118290000	0	0	63433000	54862000	0	0	0	0
P35700	P35700	9	9	8	Peroxiredoxin-1	Prdx1	sp|P35700|PRDX1_MOUSE Peroxiredoxin-1 OS=Mus musculus OX=10090 GN=Prdx1 PE=1 SV=1	1	9	9	8	8	9	7	8	8	9	7	8	7	8	6	7	36.2	36.2	32.2	22.176	199	199	3.29	3	1	35	26	0	323.31	35.7	36.2	32.2	35.7	4452500000	988860000	1846200000	841660000	775770000	665130000	1110300000	569270000	733490000
P35802	P35802	8	8	8	Neuronal membrane glycoprotein M6-a	Gpm6a	sp|P35802|GPM6A_MOUSE Neuronal membrane glycoprotein M6-a OS=Mus musculus OX=10090 GN=Gpm6a PE=1 SV=1	1	8	8	8	3	6	7	5	3	6	7	5	3	6	7	5	18	18	18	31.149	278	278	2.42	10	6	26	1	0	323.31	11.5	15.5	18	11.9	31815000000	988750000	7349800000	17272000000	6204800000	6588900000	13422000000	17018000000	15001000000
P35803	P35803	5	5	5	Neuronal membrane glycoprotein M6-b	Gpm6b	sp|P35803|GPM6B_MOUSE Neuronal membrane glycoprotein M6-b OS=Mus musculus OX=10090 GN=Gpm6b PE=1 SV=2	1	5	5	5	2	5	2	3	2	5	2	3	2	5	2	3	15.5	15.5	15.5	36.209	328	328	2.2	6	4	10		0	79.488	7.9	15.5	7.9	10.4	1556700000	105080000	881460000	319160000	251030000	487990000	820690000	509330000	339290000
P35979	P35979	2	2	2	60S ribosomal protein L12	Rpl12	sp|P35979|RL12_MOUSE 60S ribosomal protein L12 OS=Mus musculus OX=10090 GN=Rpl12 PE=1 SV=2	1	2	2	2	1	2	0	0	1	2	0	0	1	2	0	0	14.5	14.5	14.5	17.804	165	165	3.6			2	3	0.001139	14.326	5.5	14.5	0	0	328700000	71436000	257270000	0	0	0	0	0	0
P35980	P35980	5	5	5	60S ribosomal protein L18	Rpl18	sp|P35980|RL18_MOUSE 60S ribosomal protein L18 OS=Mus musculus OX=10090 GN=Rpl18 PE=1 SV=3	1	5	5	5	4	4	1	1	4	4	1	1	4	4	1	1	25	25	25	21.644	188	188	2.86	2		10	2	0	96.372	24.5	25	4.8	6.9	489430000	280900000	200830000	0	7707200	386440000	290990000	0	0
P36916	P36916	6	6	6	Guanine nucleotide-binding protein-like 1	Gnl1	sp|P36916|GNL1_MOUSE Guanine nucleotide-binding protein-like 1 OS=Mus musculus OX=10090 GN=Gnl1 PE=1 SV=4	1	6	6	6	0	3	3	6	0	3	3	6	0	3	3	6	11.5	11.5	11.5	68.77	607	607	1.69	4	9			0	36.746	0	5.3	5.1	11.5	97605000	0	14750000	20087000	62767000	0	12040000	14118000	19506000
P37040	P37040	4	4	4	NADPH--cytochrome P450 reductase	Por	sp|P37040|NCPR_MOUSE NADPH--cytochrome P450 reductase OS=Mus musculus OX=10090 GN=Por PE=1 SV=2	1	4	4	4	1	3	3	4	1	3	3	4	1	3	3	4	6	6	6	77.043	678	678	1.69	5	7	1		0	31.257	1.3	4.1	4.1	6	117730000	4584300	33950000	27575000	51616000	0	16920000	17343000	17805000
P38060	P38060	1	1	1	Hydroxymethylglutaryl-CoA lyase, mitochondrial	Hmgcl	sp|P38060|HMGCL_MOUSE Hydroxymethylglutaryl-CoA lyase, mitochondrial OS=Mus musculus OX=10090 GN=Hmgcl PE=1 SV=2	1	1	1	1	1	0	1	1	1	0	1	1	1	0	1	1	3.4	3.4	3.4	34.238	325	325	3			3		0.0013593	7.6173	3.4	0	3.4	3.4	24146000	3423400	0	13203000	7520000	0	0	0	0
P38647	P38647	18	18	18	Stress-70 protein, mitochondrial	Hspa9	sp|P38647|GRP75_MOUSE Stress-70 protein, mitochondrial OS=Mus musculus OX=10090 GN=Hspa9 PE=1 SV=3	1	18	18	18	2	8	11	11	2	8	11	11	2	8	11	11	35.6	35.6	35.6	73.46	679	679	1.84	11	30	4		0	323.31	3.5	16.9	21.8	22.4	1902400000	88125000	327010000	681850000	805440000	0	127550000	223390000	187350000
P39053	P39053	46	46	36	Dynamin-1	Dnm1	sp|P39053|DYN1_MOUSE Dynamin-1 OS=Mus musculus OX=10090 GN=Dnm1 PE=1 SV=2	1	46	46	36	25	44	33	42	25	44	33	42	18	34	23	32	47.2	47.2	36.1	97.802	867	867	1.74	183	70	56	20	0	323.31	26	47.1	37.7	42.8	32660000000	3544700000	12664000000	6124400000	10327000000	1031400000	1176000000	1128800000	1279400000
P39054	P39054	14	2	2	Dynamin-2	Dnm2	sp|P39054|DYN2_MOUSE Dynamin-2 OS=Mus musculus OX=10090 GN=Dnm2 PE=1 SV=2	1	14	2	2	7	13	10	13	1	1	1	2	1	1	1	2	14.7	2.4	2.4	98.144	870	870	2	5	4	3	1	0	58.843	7.7	13.4	11.4	14.6	1996500000	321450000	621810000	458420000	594830000	0	0	0	0
P39447	P39447	2	2	2	Tight junction protein ZO-1	Tjp1	sp|P39447|ZO1_MOUSE Tight junction protein ZO-1 OS=Mus musculus OX=10090 GN=Tjp1 PE=1 SV=2	1	2	2	2	0	2	0	0	0	2	0	0	0	2	0	0	1.1	1.1	1.1	194.74	1745	1745	1	2				0.0014465	11.533	0	1.1	0	0	12277000	0	12277000	0	0	0	0	0	0
P40124	P40124	11	10	10	Adenylyl cyclase-associated protein 1	Cap1	sp|P40124|CAP1_MOUSE Adenylyl cyclase-associated protein 1 OS=Mus musculus OX=10090 GN=Cap1 PE=1 SV=4	1	11	10	10	4	1	8	10	4	1	7	9	4	1	7	9	30.6	28.9	28.9	51.564	474	474	2.12		21	3		0	91.037	11.8	2.3	21.5	30.4	1653800000	93673000	3477800	767000000	789600000	450660000	0	276530000	272540000
P40142	P40142	14	14	14	Transketolase	Tkt	sp|P40142|TKT_MOUSE Transketolase OS=Mus musculus OX=10090 GN=Tkt PE=1 SV=1	1	14	14	14	4	5	13	12	4	5	13	12	4	5	13	12	23.8	23.8	23.8	67.63	623	623	2.16	6	28	9	2	0	130.62	8.2	9.6	20.9	20.9	2116800000	181120000	136800000	770760000	1028100000	193210000	66236000	183490000	223710000
P40336	P40336	4	4	4	Vacuolar protein sorting-associated protein 26A	Vps26a	sp|P40336|VP26A_MOUSE Vacuolar protein sorting-associated protein 26A OS=Mus musculus OX=10090 GN=Vps26a PE=1 SV=1	1	4	4	4	1	0	1	3	1	0	1	3	1	0	1	3	15.9	15.9	15.9	38.113	327	327	2.43		4	3		0.00074627	23.972	3.7	0	4	12.2	51370000	10751000	0	9345400	31274000	0	0	0	0
P40630	P40630	3	3	3	Transcription factor A, mitochondrial	Tfam	sp|P40630|TFAM_MOUSE Transcription factor A, mitochondrial OS=Mus musculus OX=10090 GN=Tfam PE=1 SV=2	1	3	3	3	1	1	2	0	1	1	2	0	1	1	2	0	11.5	11.5	11.5	27.987	243	243	3			4		0.0011703	16.855	4.5	3.3	7	0	52479000	11297000	21664000	19517000	0	0	0	0	0
P41105	P41105	3	3	3	60S ribosomal protein L28	Rpl28	sp|P41105|RL28_MOUSE 60S ribosomal protein L28 OS=Mus musculus OX=10090 GN=Rpl28 PE=1 SV=2	1	3	3	3	0	2	1	0	0	2	1	0	0	2	1	0	21.2	21.2	21.2	15.733	137	137	4				3	0	32.032	0	13.1	8	0	40257000	0	40257000	0	0	0	0	0	0
P41216	P41216	8	8	6	Long-chain-fatty-acid--CoA ligase 1	Acsl1	sp|P41216|ACSL1_MOUSE Long-chain-fatty-acid--CoA ligase 1 OS=Mus musculus OX=10090 GN=Acsl1 PE=1 SV=2	1	8	8	6	0	1	5	7	0	1	5	7	0	1	3	5	12.2	12.2	9.3	77.951	699	699	1.92	1	12			0	48.098	0	1	7	11	192760000	0	9759800	59912000	123080000	0	0	21110000	24841000
P42125	P42125	5	5	5	Enoyl-CoA delta isomerase 1, mitochondrial	Eci1	sp|P42125|ECI1_MOUSE Enoyl-CoA delta isomerase 1, mitochondrial OS=Mus musculus OX=10090 GN=Eci1 PE=1 SV=2	1	5	5	5	1	5	2	0	1	5	2	0	1	5	2	0	21.5	21.5	21.5	32.25	289	289	3			8		0	40.116	2.8	21.5	9.7	0	272090000	12368000	185850000	73871000	0	0	0	0	0
P42208	P42208	2	2	2	Septin-2	Sept2	sp|P42208|SEPT2_MOUSE Septin-2 OS=Mus musculus OX=10090 GN=Septin2 PE=1 SV=2	1	2	2	2	1	1	1	2	1	1	1	2	1	1	1	2	5.3	5.3	5.3	41.525	361	361	2.4		3	2		0.0010758	12.652	2.5	2.5	2.5	5.3	61640000	13696000	3403400	17191000	27349000	0	0	0	0
P42669	P42669	5	5	5	Transcriptional activator protein Pur-alpha	Pura	sp|P42669|PURA_MOUSE Transcriptional activator protein Pur-alpha OS=Mus musculus OX=10090 GN=Pura PE=1 SV=1	1	5	5	5	2	3	3	4	2	3	3	4	2	3	3	4	29.3	29.3	29.3	34.883	321	321	2.33		11	3	1	0	53.663	5.3	12.5	12.5	22.1	1179800000	100790000	86021000	497050000	495930000	219980000	298440000	305280000	316910000
P42859	P42859	13	13	13	Huntingtin	Htt	sp|P42859|HD_MOUSE Huntingtin OS=Mus musculus OX=10090 GN=Htt PE=1 SV=2	1	13	13	13	0	10	1	5	0	10	1	5	0	10	1	5	3.9	3.9	3.9	344.69	3119	3119	1.06	15	1			0	76.414	0	3.2	0.3	1.5	360630000	0	91538000	3671200	265420000	0	202250000	0	122620000
P42932	P42932	19	19	19	T-complex protein 1 subunit theta	Cct8	sp|P42932|TCPQ_MOUSE T-complex protein 1 subunit theta OS=Mus musculus OX=10090 GN=Cct8 PE=1 SV=3	1	19	19	19	6	6	11	18	6	6	11	18	6	6	11	18	36.9	36.9	36.9	59.555	548	548	2.27		35	8	2	0	139.48	13.1	12.6	21	35.2	1368400000	121700000	66807000	439950000	739920000	89702000	111380000	105490000	123390000
P43006	P43006	11	11	11	Excitatory amino acid transporter 2	Slc1a2	sp|P43006|EAA2_MOUSE Excitatory amino acid transporter 2 OS=Mus musculus OX=10090 GN=Slc1a2 PE=1 SV=1	1	11	11	11	6	10	9	11	6	10	9	11	6	10	9	11	19.9	19.9	19.9	62.03	572	572	1.73	42	34	10	4	0	323.31	11.9	16.1	17.7	19.9	17872000000	673690000	3295200000	5520800000	8382700000	2076300000	1489500000	1653000000	2242100000
P43024	P43024	1	1	1	Cytochrome c oxidase subunit 6A1, mitochondrial	Cox6a1	sp|P43024|CX6A1_MOUSE Cytochrome c oxidase subunit 6A1, mitochondrial OS=Mus musculus OX=10090 GN=Cox6a1 PE=1 SV=2	1	1	1	1	1	1	0	1	1	1	0	1	1	1	0	1	14.4	14.4	14.4	12.352	111	111	4				5	0.0012376	17.835	14.4	14.4	0	14.4	126600000	45167000	71659000	0	9772500	0	0	0	0
P43274	P43274	5	5	2	Histone H1.4	Hist1h1e	sp|P43274|H14_MOUSE Histone H1.4 OS=Mus musculus OX=10090 GN=H1-4 PE=1 SV=2	1	5	5	2	3	3	3	4	3	3	3	4	1	1	0	1	22.4	22.4	12.8	21.977	219	219	2.39	3	6	8	1	0	34.078	14.6	16.4	9.6	15.1	569920000	200690000	125010000	52636000	191580000	384110000	165930000	71110000	116400000
P45376	P45376	6	6	6	Aldose reductase	Akr1b1	sp|P45376|ALDR_MOUSE Aldo-keto reductase family 1 member B1 OS=Mus musculus OX=10090 GN=Akr1b1 PE=1 SV=3	1	6	6	6	0	4	6	5	0	4	6	5	0	4	6	5	18.7	18.7	18.7	35.732	316	316	2.65		7	13		0	46.603	0	12.3	18.7	15.8	467820000	0	71610000	252710000	143500000	0	147030000	181910000	246620000
P45377;P21300	P45377;P21300	2;1	2;1	2;1	Aldose reductase-related protein 2;Aldose reductase-related protein 1	Akr1b8;Akr1b7	sp|P45377|ALD2_MOUSE Aldose reductase-related protein 2 OS=Mus musculus OX=10090 GN=Akr1b8 PE=1 SV=2;sp|P21300|ALD1_MOUSE Aldo-keto reductase family 1 member B7 OS=Mus musculus OX=10090 GN=Akr1b7 PE=1 SV=4	2	2	2	2	0	1	1	1	0	1	1	1	0	1	1	1	7	7	7	36.12	316	316;316	3			3		0.001023	12.03	0	4.4	4.4	2.5	56131000	0	27689000	25967000	2475300	0	0	0	0
P45591	P45591	4	3	3	Cofilin-2	Cfl2	sp|P45591|COF2_MOUSE Cofilin-2 OS=Mus musculus OX=10090 GN=Cfl2 PE=1 SV=1	1	4	3	3	1	4	3	3	0	3	2	2	0	3	2	2	30.7	24.1	24.1	18.709	166	166	4				7	0	31.116	6.6	30.7	22.3	22.3	334530000	0	226590000	46270000	61671000	0	0	0	0
P45878	P45878	2	2	2	Peptidyl-prolyl cis-trans isomerase FKBP2	Fkbp2	sp|P45878|FKBP2_MOUSE Peptidyl-prolyl cis-trans isomerase FKBP2 OS=Mus musculus OX=10090 GN=Fkbp2 PE=1 SV=1	1	2	2	2	1	2	1	1	1	2	1	1	1	2	1	1	9.3	9.3	9.3	15.344	140	140	4				5	0.0014265	22.32	9.3	9.3	8.6	8.6	273430000	18761000	178260000	39207000	37208000	0	0	0	0
P45952	P45952	5	5	5	Medium-chain specific acyl-CoA dehydrogenase, mitochondrial	Acadm	sp|P45952|ACADM_MOUSE Medium-chain specific acyl-CoA dehydrogenase, mitochondrial OS=Mus musculus OX=10090 GN=Acadm PE=1 SV=1	1	5	5	5	1	0	3	5	1	0	3	5	1	0	3	5	14.5	14.5	14.5	46.481	421	421	2.11		8	1		0	34.562	3.6	0	9.3	14.5	126540000	12278000	0	53010000	61249000	0	0	28789000	24227000
P46061	P46061	2	2	2	Ran GTPase-activating protein 1	Rangap1	sp|P46061|RAGP1_MOUSE Ran GTPase-activating protein 1 OS=Mus musculus OX=10090 GN=Rangap1 PE=1 SV=2	1	2	2	2	0	1	1	1	0	1	1	1	0	1	1	1	3.7	3.7	3.7	63.53	589	589	1.33	2	1			0.0014265	11.405	0	1.7	2	1.7	11114000	0	3395500	7718200	0	0	0	0	0
P46096	P46096	17	17	11	Synaptotagmin-1	Syt1	sp|P46096|SYT1_MOUSE Synaptotagmin-1 OS=Mus musculus OX=10090 GN=Syt1 PE=1 SV=1	1	17	17	11	14	12	14	17	14	12	14	17	9	8	9	11	44.4	44.4	32.3	47.417	421	421	2.45	11	71	42	16	0	323.31	33.3	30.4	33.3	44.4	18757000000	3954500000	1525600000	5974700000	7301800000	1837300000	1652300000	1427400000	1439700000
P46097	P46097	7	2	2	Synaptotagmin-2	Syt2	sp|P46097|SYT2_MOUSE Synaptotagmin-2 OS=Mus musculus OX=10090 GN=Syt2 PE=1 SV=1	1	7	2	2	5	4	5	7	0	0	0	2	0	0	0	2	16.1	6.2	6.2	47.262	422	422	2		2			0.0010132	11.936	10	10	10	16.1	60621000	0	0	0	60621000	0	0	0	0
P46460	P46460	41	41	41	Vesicle-fusing ATPase	Nsf	sp|P46460|NSF_MOUSE Vesicle-fusing ATPase OS=Mus musculus OX=10090 GN=Nsf PE=1 SV=2	1	41	41	41	22	38	30	34	22	38	30	34	22	38	30	34	50.7	50.7	50.7	82.613	744	744	1.87	122	102	51	16	0	323.31	27.8	46.5	35.3	44.5	24369000000	2547100000	7148300000	7161800000	7511800000	904880000	733180000	848930000	750610000
P46471	P46471	9	9	9	26S protease regulatory subunit 7	Psmc2	sp|P46471|PRS7_MOUSE 26S proteasome regulatory subunit 7 OS=Mus musculus OX=10090 GN=Psmc2 PE=1 SV=5	1	9	9	9	2	1	7	7	2	1	7	7	2	1	7	7	22.2	22.2	22.2	48.647	433	433	2.18		14	3		0	58.932	5.5	2.8	16.4	17.1	240880000	24524000	4263100	114820000	97272000	52917000	0	41647000	39855000
P46638;P62492;Q9WTL2	P46638;P62492	13;11;1	13;11;1	13;11;1	Ras-related protein Rab-11B;Ras-related protein Rab-11A	Rab11b;Rab11a	sp|P46638|RB11B_MOUSE Ras-related protein Rab-11B OS=Mus musculus OX=10090 GN=Rab11b PE=1 SV=3;sp|P62492|RB11A_MOUSE Ras-related protein Rab-11A OS=Mus musculus OX=10090 GN=Rab11a PE=1 SV=3	3	13	13	13	7	13	9	9	7	13	9	9	7	13	9	9	59.2	59.2	59.2	24.489	218	218;216;213	3.12			45	6	0	139.32	31.2	59.2	43.1	45.9	4204600000	699070000	1804000000	1133700000	567810000	820730000	724910000	557780000	591110000
P46660	P46660	22	17	17	Alpha-internexin	Ina	sp|P46660|AINX_MOUSE Alpha-internexin OS=Mus musculus OX=10090 GN=Ina PE=1 SV=3	1	22	17	17	2	16	17	19	1	11	14	16	1	11	14	16	39.7	33.9	33.9	55.382	501	501	1.96	10	37	6	1	0	323.31	3.8	32.5	36.3	37.7	2142700000	17622000	186530000	705210000	1233400000	0	92916000	153250000	349820000
P46664	P46664	5	4	4	Adenylosuccinate synthetase isozyme 2	Adss	sp|P46664|PURA2_MOUSE Adenylosuccinate synthetase isozyme 2 OS=Mus musculus OX=10090 GN=Adss2 PE=1 SV=2	1	5	4	4	0	1	1	5	0	1	1	4	0	1	1	4	18.2	15.1	15.1	50.02	456	456	2		6			0	34.44	0	4.2	4.6	18.2	109260000	0	3272100	20517000	85473000	0	0	0	0
P46737	P46737	1	1	1	Lys-63-specific deubiquitinase BRCC36	Brcc3	sp|P46737|BRCC3_MOUSE Lys-63-specific deubiquitinase BRCC36 OS=Mus musculus OX=10090 GN=Brcc3 PE=1 SV=1	1	1	1	1	0	0	1	0	0	0	1	0	0	0	1	0	4.1	4.1	4.1	33.34	291	291	3			1		0.0013612	7.6825	0	0	4.1	0	27145000	0	0	27145000	0	0	0	0	0
P47708;P70169	P47708	10;1	10;1	10;1	Rabphilin-3A	Rph3a	sp|P47708|RP3A_MOUSE Rabphilin-3A OS=Mus musculus OX=10090 GN=Rph3a PE=1 SV=2	2	10	10	10	1	9	3	7	1	9	3	7	1	9	3	7	19.4	19.4	19.4	75.488	681	681;412	1.42	16	6	2		0	92.591	3.1	16.3	5.9	14.1	708960000	79394000	301570000	59460000	268530000	0	199150000	38222000	106630000
P47738;P24549;O35945;Q62148;Q9JHW9	P47738	11;1;1;1;1	11;1;1;1;1	10;0;0;0;0	Aldehyde dehydrogenase, mitochondrial	Aldh2	sp|P47738|ALDH2_MOUSE Aldehyde dehydrogenase, mitochondrial OS=Mus musculus OX=10090 GN=Aldh2 PE=1 SV=1	5	11	11	10	3	0	10	10	3	0	10	10	3	0	9	9	26.6	26.6	25	56.537	519	519;501;501;518;512	2.21		20	3	1	0	101.66	5.6	0	24.1	24.1	1120000000	52836000	0	491280000	575880000	81472000	0	103640000	109160000
P47740	P47740	3	3	3	Fatty aldehyde dehydrogenase	Aldh3a2	sp|P47740|AL3A2_MOUSE Aldehyde dehydrogenase family 3 member A2 OS=Mus musculus OX=10090 GN=Aldh3a2 PE=1 SV=2	1	3	3	3	0	0	2	2	0	0	2	2	0	0	2	2	7	7	7	53.97	484	484	2		4			0.0012571	17.994	0	0	4.8	3.9	32367000	0	0	18506000	13860000	0	0	0	0
P47754;P47753	P47754	11;2	11;2	11;2	F-actin-capping protein subunit alpha-2	Capza2	sp|P47754|CAZA2_MOUSE F-actin-capping protein subunit alpha-2 OS=Mus musculus OX=10090 GN=Capza2 PE=1 SV=3	2	11	11	11	5	9	9	6	5	9	9	6	5	9	9	6	54.2	54.2	54.2	32.967	286	286;286	2.92		6	30	3	0	123.84	25.9	40.6	48.6	30.1	2572500000	337900000	534300000	1164800000	535530000	404530000	354150000	697140000	856080000
P47757	P47757	8	8	8	F-actin-capping protein subunit beta	Capzb	sp|P47757|CAPZB_MOUSE F-actin-capping protein subunit beta OS=Mus musculus OX=10090 GN=Capzb PE=1 SV=3	1	8	8	8	3	7	6	4	3	7	6	4	3	7	6	4	30.3	30.3	30.3	31.345	277	277	3	1		21	2	0	168.3	8.7	27.1	23.1	13.7	1967500000	308090000	764400000	638160000	256870000	539900000	706670000	533770000	545280000
P47791	P47791	3	3	3	Glutathione reductase, mitochondrial	Gsr	sp|P47791|GSHR_MOUSE Glutathione reductase, mitochondrial OS=Mus musculus OX=10090 GN=Gsr PE=1 SV=3	1	3	3	3	1	0	1	3	1	0	1	3	1	0	1	3	8.6	8.6	8.6	53.662	500	500	2.2		4	1		0.0012508	17.935	2.4	0	2.4	8.6	67266000	11807000	0	16679000	38781000	0	0	0	0
P47802	P47802	3	3	3	Metaxin-1	Mtx1	sp|P47802|MTX1_MOUSE Metaxin-1 OS=Mus musculus OX=10090 GN=Mtx1 PE=1 SV=1	1	3	3	3	0	2	2	1	0	2	2	1	0	2	2	1	8.2	8.2	8.2	35.623	317	317	3			5		0.0013569	19.575	0	6	5	2.8	68093000	0	35977000	25294000	6822600	0	0	0	0
P47809	P47809	3	3	3	Dual specificity mitogen-activated protein kinase kinase 4	Map2k4	sp|P47809|MP2K4_MOUSE Dual specificity mitogen-activated protein kinase kinase 4 OS=Mus musculus OX=10090 GN=Map2k4 PE=1 SV=2	1	3	3	3	2	1	3	3	2	1	3	3	2	1	3	3	8.3	8.3	8.3	44.113	397	397	2.36		7	4		0.0013396	19.26	5	2.8	8.3	8.3	125540000	21618000	9011500	39467000	55441000	53584000	0	21929000	25557000
P47857	P47857	23	23	20	ATP-dependent 6-phosphofructokinase, muscle type	Pfkm	sp|P47857|PFKAM_MOUSE ATP-dependent 6-phosphofructokinase, muscle type OS=Mus musculus OX=10090 GN=Pfkm PE=1 SV=3	1	23	23	20	12	22	15	19	12	22	15	19	10	19	12	16	35.9	35.9	32.4	85.268	780	780	1.51	78	24	14	3	0	269.26	19.5	32.9	21.5	28.8	5791900000	403600000	2632800000	921600000	1833900000	253870000	285290000	180650000	217760000
P47911	P47911	8	8	8	60S ribosomal protein L6	Rpl6	sp|P47911|RL6_MOUSE 60S ribosomal protein L6 OS=Mus musculus OX=10090 GN=Rpl6 PE=1 SV=3	1	8	8	8	4	7	5	6	4	7	5	6	4	7	5	6	27	27	27	33.509	296	296	2.67	3	6	23	1	0	53.932	14.5	26.7	14.9	19.9	642500000	104360000	221140000	179190000	137820000	117270000	142920000	111630000	203700000
P47941	P47941	3	3	3	Crk-like protein	Crkl	sp|P47941|CRKL_MOUSE Crk-like protein OS=Mus musculus OX=10090 GN=Crkl PE=1 SV=2	1	3	3	3	0	0	1	3	0	0	1	3	0	0	1	3	12.9	12.9	12.9	33.83	303	303	2		4			0.0013098	18.809	0	0	4	12.9	39052000	0	0	9153900	29898000	0	0	0	0
P47955	P47955	1	1	1	60S acidic ribosomal protein P1	Rplp1	sp|P47955|RLA1_MOUSE 60S acidic ribosomal protein P1 OS=Mus musculus OX=10090 GN=Rplp1 PE=1 SV=1	1	1	1	1	1	1	0	1	1	1	0	1	1	1	0	1	14	14	14	11.475	114	114	4				3	0.0013556	7.5673	14	14	0	14	273690000	100600000	126120000	0	46966000	0	0	0	0
P47962	P47962	4	4	4	60S ribosomal protein L5	Rpl5	sp|P47962|RL5_MOUSE 60S ribosomal protein L5 OS=Mus musculus OX=10090 GN=Rpl5 PE=1 SV=3	1	4	4	4	0	4	2	3	0	4	2	3	0	4	2	3	15.2	15.2	15.2	34.4	297	297	3			9		0	30.251	0	15.2	8.1	12.8	298430000	0	152150000	86532000	59751000	0	177470000	0	157440000
P47963	P47963	6	6	6	60S ribosomal protein L13	Rpl13	sp|P47963|RL13_MOUSE 60S ribosomal protein L13 OS=Mus musculus OX=10090 GN=Rpl13 PE=1 SV=3	1	6	6	6	4	6	6	4	4	6	6	4	4	6	6	4	29.4	29.4	29.4	24.305	211	211	2.78	3	2	20	2	0	323.31	19.4	29.4	29.4	19	738950000	185050000	331960000	151530000	70416000	298900000	184500000	88901000	140510000
P47964	P47964	1	1	1	60S ribosomal protein L36	Rpl36	sp|P47964|RL36_MOUSE 60S ribosomal protein L36 OS=Mus musculus OX=10090 GN=Rpl36 PE=1 SV=2	1	1	1	1	0	1	0	0	0	1	0	0	0	1	0	0	8.6	8.6	8.6	12.215	105	105	4				3	0.0026087	6.606	0	8.6	0	0	40686000	0	40686000	0	0	0	0	0	0
P48024;Q9CXU9	P48024;Q9CXU9	1;1	1;1	1;1	Eukaryotic translation initiation factor 1;Eukaryotic translation initiation factor 1b	Eif1;Eif1b	sp|P48024|EIF1_MOUSE Eukaryotic translation initiation factor 1 OS=Mus musculus OX=10090 GN=Eif1 PE=1 SV=2;sp|Q9CXU9|EIF1B_MOUSE Eukaryotic translation initiation factor 1b OS=Mus musculus OX=10090 GN=Eif1b PE=1 SV=2	2	1	1	1	0	1	0	0	0	1	0	0	0	1	0	0	14.2	14.2	14.2	12.746	113	113;113	4				1	0.0034144	6.4163	0	14.2	0	0	30446000	0	30446000	0	0	0	0	0	0
P48036	P48036	14	14	14	Annexin A5	Anxa5	sp|P48036|ANXA5_MOUSE Annexin A5 OS=Mus musculus OX=10090 GN=Anxa5 PE=1 SV=1	1	14	14	14	7	13	9	5	7	13	9	5	7	13	9	5	45.1	45.1	45.1	35.752	319	319	3.08			35	3	0	218.63	22.3	41.1	30.7	14.4	1601400000	275800000	731960000	416460000	177200000	163740000	290650000	192740000	268490000
P48318	P48318	6	6	5	Glutamate decarboxylase 1	Gad1	sp|P48318|DCE1_MOUSE Glutamate decarboxylase 1 OS=Mus musculus OX=10090 GN=Gad1 PE=1 SV=2	1	6	6	5	0	0	4	4	0	0	4	4	0	0	3	3	14.3	14.3	12.6	66.648	593	593	2		9			0	45.967	0	0	8.8	8.8	152130000	0	0	64570000	87561000	0	0	45822000	34007000
P48320	P48320	6	5	5	Glutamate decarboxylase 2	Gad2	sp|P48320|DCE2_MOUSE Glutamate decarboxylase 2 OS=Mus musculus OX=10090 GN=Gad2 PE=1 SV=1	1	6	5	5	0	0	3	6	0	0	2	5	0	0	2	5	10.8	9.1	9.1	65.223	585	585	2		7			0	30.917	0	0	5.5	10.8	158380000	0	0	44326000	114060000	0	0	56389000	39519000
P48453	P48453	12	5	5	Serine/threonine-protein phosphatase 2B catalytic subunit beta isoform	Ppp3cb	sp|P48453|PP2BB_MOUSE Serine/threonine-protein phosphatase 2B catalytic subunit beta isoform OS=Mus musculus OX=10090 GN=Ppp3cb PE=1 SV=2	1	12	5	5	7	6	10	11	2	1	3	4	2	1	3	4	25	9.5	9.5	59.173	525	525	2.5		7	4	1	0	130.37	13	11	19.4	24.4	350510000	55322000	7159700	122630000	165390000	117820000	0	99287000	102810000
P48678	P48678	22	22	21	Prelamin-A/C;Lamin-A/C	Lmna	sp|P48678|LMNA_MOUSE Prelamin-A/C OS=Mus musculus OX=10090 GN=Lmna PE=1 SV=2	1	22	22	21	0	5	17	18	0	5	17	18	0	5	16	18	32.8	32.8	31.6	74.237	665	665	1.93	5	35	2		0	157.87	0	7.4	26.2	28.1	1051300000	0	28351000	467740000	555250000	0	4238200	82531000	82559000
P48722	P48722	13	12	12	Heat shock 70 kDa protein 4L	Hspa4l	sp|P48722|HS74L_MOUSE Heat shock 70 kDa protein 4L OS=Mus musculus OX=10090 GN=Hspa4l PE=1 SV=2	1	13	12	12	2	12	5	7	2	11	5	7	2	11	5	7	18.7	16.8	16.8	94.381	838	838	1.22	27	3	2		0	94.12	2.7	17.1	6.9	9.5	947620000	19236000	556780000	88004000	283600000	57767000	138720000	70411000	116830000
P48758	P48758	16	16	15	Carbonyl reductase [NADPH] 1	Cbr1	sp|P48758|CBR1_MOUSE Carbonyl reductase [NADPH] 1 OS=Mus musculus OX=10090 GN=Cbr1 PE=1 SV=3	1	16	16	15	8	13	10	10	8	13	10	10	7	12	9	9	57.4	57.4	54.5	30.641	277	277	3.02			43	1	0	126.82	31.4	45.8	36.8	35.4	2007000000	281550000	916400000	480440000	328580000	236240000	328050000	246560000	280770000
P48771	P48771	2	2	2	Cytochrome c oxidase subunit 7A2, mitochondrial	Cox7a2	sp|P48771|CX7A2_MOUSE Cytochrome c oxidase subunit 7A2, mitochondrial OS=Mus musculus OX=10090 GN=Cox7a2 PE=1 SV=2	1	2	2	2	2	1	1	2	2	1	1	2	2	1	1	2	27.7	27.7	27.7	9.2908	83	83	3.57	1			6	0	217	27.7	12	12	27.7	371350000	240010000	71472000	25992000	33872000	442540000	0	0	110870000
P48774	P48774	8	7	7	Glutathione S-transferase Mu 5	Gstm5	sp|P48774|GSTM5_MOUSE Glutathione S-transferase Mu 5 OS=Mus musculus OX=10090 GN=Gstm5 PE=1 SV=1	1	8	7	7	6	7	5	5	5	6	4	4	5	6	4	4	38.4	34.4	34.4	26.635	224	224	3.1			19	2	0	85.899	27.7	31.2	23.2	22.3	1329900000	281360000	522830000	352420000	173260000	517980000	464550000	329110000	377560000
P48962;Q3V132	P48962	17;3	17;3	9;0	ADP/ATP translocase 1	Slc25a4	sp|P48962|ADT1_MOUSE ADP/ATP translocase 1 OS=Mus musculus OX=10090 GN=Slc25a4 PE=1 SV=4	2	17	17	9	14	15	14	12	14	15	14	12	7	9	7	7	49.3	49.3	25.5	32.904	298	298;320	2.58	48	25	70	43	0	323.31	44.3	43.3	39.6	36.6	60688000000	9491700000	23308000000	16878000000	11011000000	4336400000	10674000000	7538000000	8687000000
P49025	P49025	7	7	7	Citron Rho-interacting kinase	Cit	sp|P49025|CTRO_MOUSE Citron Rho-interacting kinase OS=Mus musculus OX=10090 GN=Cit PE=1 SV=3	1	7	7	7	0	7	0	3	0	7	0	3	0	7	0	3	3.4	3.4	3.4	235.39	2055	2055	1	10				0	41.226	0	3.4	0	1.3	69929000	0	52057000	0	17871000	0	10064000	0	10969000
P49312	P49312	9	9	9	Heterogeneous nuclear ribonucleoprotein A1;Heterogeneous nuclear ribonucleoprotein A1, N-terminally processed	Hnrnpa1	sp|P49312|ROA1_MOUSE Heterogeneous nuclear ribonucleoprotein A1 OS=Mus musculus OX=10090 GN=Hnrnpa1 PE=1 SV=2	1	9	9	9	4	4	4	8	4	4	4	8	4	4	4	8	28.8	28.8	28.8	34.196	320	320	2.88		3	22		0	62.626	15.3	9.4	15.6	28.8	884580000	168210000	165830000	283910000	266630000	210340000	173220000	166440000	221010000
P49442	P49442	3	3	3	Inositol polyphosphate 1-phosphatase	Inpp1	sp|P49442|INPP_MOUSE Inositol polyphosphate 1-phosphatase OS=Mus musculus OX=10090 GN=Inpp1 PE=1 SV=2	1	3	3	3	1	0	2	2	1	0	2	2	1	0	2	2	8.1	8.1	8.1	43.346	396	396	2.2		4	1		0.0013908	20.511	2.3	0	5.1	5.3	64030000	6420900	0	19058000	38551000	0	0	0	0
P49443	P49443	2	2	2	Protein phosphatase 1A	Ppm1a	sp|P49443|PPM1A_MOUSE Protein phosphatase 1A OS=Mus musculus OX=10090 GN=Ppm1a PE=1 SV=1	1	2	2	2	0	0	2	1	0	0	2	1	0	0	2	1	7.9	7.9	7.9	42.432	382	382	2		3			0.00072098	22.988	0	0	7.9	4.7	110000000	0	0	66571000	43428000	0	0	0	0
P49615;Q14AX6;Q69ZA1;P11440;P97377;Q99J95;Q3V3A1;Q80YP0;Q64261;P30285	P49615	11;1;1;1;1;1;1;1;1;1	11;1;1;1;1;1;1;1;1;1	10;0;0;0;0;0;0;0;0;0	Cyclin-dependent-like kinase 5	Cdk5	sp|P49615|CDK5_MOUSE Cyclin-dependent-like kinase 5 OS=Mus musculus OX=10090 GN=Cdk5 PE=1 SV=1	10	11	11	10	3	10	2	3	3	10	2	3	2	9	1	2	37.7	37.7	34.9	33.288	292	292;1484;1511;297;346;372;433;303;326;303	2.95		1	18		0	69.885	11.3	35.3	5.1	9.2	701740000	103340000	435330000	67102000	95971000	179090000	267600000	0	171810000
P49722	P49722	5	5	5	Proteasome subunit alpha type-2	Psma2	sp|P49722|PSA2_MOUSE Proteasome subunit alpha type-2 OS=Mus musculus OX=10090 GN=Psma2 PE=1 SV=3	1	5	5	5	2	4	3	1	2	4	3	1	2	4	3	1	32.1	32.1	32.1	25.926	234	234	3.09			10	1	0	59.986	15	29.1	23.1	3	568160000	80686000	300740000	169780000	16955000	159940000	304380000	191370000	0
P50171	P50171	4	4	4	Estradiol 17-beta-dehydrogenase 8	Hsd17b8	sp|P50171|DHB8_MOUSE (3R)-3-hydroxyacyl-CoA dehydrogenase OS=Mus musculus OX=10090 GN=Hsd17b8 PE=1 SV=2	1	4	4	4	3	2	2	1	3	2	2	1	3	2	2	1	20.8	20.8	20.8	26.588	259	259	3			9		0	28.823	15.1	11.6	10.4	5.8	120690000	38573000	33741000	41820000	6554800	0	0	0	0
P50247	P50247	8	8	8	Adenosylhomocysteinase	Ahcy	sp|P50247|SAHH_MOUSE Adenosylhomocysteinase OS=Mus musculus OX=10090 GN=Ahcy PE=1 SV=3	1	8	8	8	1	0	7	6	1	0	7	6	1	0	7	6	20.6	20.6	20.6	47.688	432	432	2.07		13	1		0	53.784	2.5	0	17.8	15.5	311760000	7529200	0	160110000	144120000	0	0	66020000	77074000
P50396	P50396	20	20	15	Rab GDP dissociation inhibitor alpha	Gdi1	sp|P50396|GDIA_MOUSE Rab GDP dissociation inhibitor alpha OS=Mus musculus OX=10090 GN=Gdi1 PE=1 SV=3	1	20	20	15	10	9	15	19	10	9	15	19	6	5	11	15	49.2	49.2	38.5	50.521	447	447	2.49	3	52	18	14	0	223.87	23.7	21.7	44.5	49.2	8350500000	807240000	614970000	3328700000	3599600000	653340000	478250000	699600000	577270000
P50429	P50429	1	1	1	Arylsulfatase B	Arsb	sp|P50429|ARSB_MOUSE Arylsulfatase B OS=Mus musculus OX=10090 GN=Arsb PE=1 SV=3	1	1	1	1	0	0	1	1	0	0	1	1	0	0	1	1	2.1	2.1	2.1	59.646	534	534	2		2			0.0021844	6.6858	0	0	2.1	2.1	24842000	0	0	13304000	11538000	0	0	0	0
P50516	P50516	33	33	33	V-type proton ATPase catalytic subunit A	Atp6v1a	sp|P50516|VATA_MOUSE V-type proton ATPase catalytic subunit A OS=Mus musculus OX=10090 GN=Atp6v1a PE=1 SV=2	1	33	33	33	16	19	28	27	16	19	28	27	16	19	28	27	57.7	57.7	57.7	68.325	617	617	2.13	30	109	28	13	0	323.31	28.8	32.4	53.5	48	18920000000	1999400000	1421000000	7208100000	8291900000	1222800000	568350000	1415900000	1422400000
P50518;Q9D593	P50518	15;4	15;4	15;4	V-type proton ATPase subunit E 1	Atp6v1e1	sp|P50518|VATE1_MOUSE V-type proton ATPase subunit E 1 OS=Mus musculus OX=10090 GN=Atp6v1e1 PE=1 SV=2	2	15	15	15	10	14	13	11	10	14	13	11	10	14	13	11	62.4	62.4	62.4	26.157	226	226;226	3.06		1	61	5	0	221.53	41.6	50	50	53.1	8119300000	1264700000	2722800000	3019200000	1112500000	1412000000	1885400000	1907600000	1585600000
P50544	P50544	7	7	7	Very long-chain specific acyl-CoA dehydrogenase, mitochondrial	Acadvl	sp|P50544|ACADV_MOUSE Very long-chain specific acyl-CoA dehydrogenase, mitochondrial OS=Mus musculus OX=10090 GN=Acadvl PE=1 SV=3	1	7	7	7	0	0	5	7	0	0	5	7	0	0	5	7	11.6	11.6	11.6	70.875	656	656	2		12			0	41.621	0	0	8.5	11.6	160130000	0	0	58789000	101340000	0	0	30179000	34590000
P50571;P63137;P63080	P50571;P63137;P63080	2;2;1	2;2;1	2;2;1	Gamma-aminobutyric acid receptor subunit beta-1;Gamma-aminobutyric acid receptor subunit beta-2;Gamma-aminobutyric acid receptor subunit beta-3	Gabrb1;Gabrb2;Gabrb3	sp|P50571|GBRB1_MOUSE Gamma-aminobutyric acid receptor subunit beta-1 OS=Mus musculus OX=10090 GN=Gabrb1 PE=1 SV=1;sp|P63137|GBRB2_MOUSE Gamma-aminobutyric acid receptor subunit beta-2 OS=Mus musculus OX=10090 GN=Gabrb2 PE=1 SV=2;sp|P63080|GBRB3_MOUSE Gamm	3	2	2	2	1	1	2	1	1	1	2	1	1	1	2	1	5.1	5.1	5.1	54.1	474	474;512;473	1.5	4	4			0.0011056	13.262	2.5	2.5	5.1	2.5	104030000	6584200	19889000	42744000	34813000	0	0	0	0
P50580	P50580	5	5	5	Proliferation-associated protein 2G4	Pa2g4	sp|P50580|PA2G4_MOUSE Proliferation-associated protein 2G4 OS=Mus musculus OX=10090 GN=Pa2g4 PE=1 SV=3	1	5	5	5	1	0	3	4	1	0	3	4	1	0	3	4	14.7	14.7	14.7	43.698	394	394	2.25		7		1	0	30.477	2	0	7.6	12.7	121690000	4139600	0	40685000	76863000	0	0	21368000	27731000
P51150	P51150	12	12	12	Ras-related protein Rab-7a	Rab7a	sp|P51150|RAB7A_MOUSE Ras-related protein Rab-7a OS=Mus musculus OX=10090 GN=Rab7a PE=1 SV=2	1	12	12	12	7	12	7	6	7	12	7	6	7	12	7	6	64.3	64.3	64.3	23.489	207	207	3.35	1		31	20	0	202.18	36.2	64.3	38.2	35.7	3459500000	708230000	1764500000	577790000	408970000	524710000	776460000	340020000	381680000
P51174	P51174	5	5	5	Long-chain specific acyl-CoA dehydrogenase, mitochondrial	Acadl	sp|P51174|ACADL_MOUSE Long-chain specific acyl-CoA dehydrogenase, mitochondrial OS=Mus musculus OX=10090 GN=Acadl PE=1 SV=2	1	5	5	5	0	0	4	5	0	0	4	5	0	0	4	5	12.8	12.8	12.8	47.907	430	430	2		9			0	64.846	0	0	10.7	12.8	241880000	0	0	128460000	113430000	0	0	60002000	57132000
P51410	P51410	5	5	5	60S ribosomal protein L9	Rpl9	sp|P51410|RL9_MOUSE 60S ribosomal protein L9 OS=Mus musculus OX=10090 GN=Rpl9 PE=1 SV=2	1	5	5	5	4	5	1	1	4	5	1	1	4	5	1	1	26.6	26.6	26.6	21.881	192	192	3			11		0	46.509	16.7	26.6	5.2	7.3	531650000	102190000	337230000	49539000	42693000	249760000	258280000	0	0
P51655	P51655	1	1	1	Glypican-4;Secreted glypican-4	Gpc4	sp|P51655|GPC4_MOUSE Glypican-4 OS=Mus musculus OX=10090 GN=Gpc4 PE=1 SV=2	1	1	1	1	0	0	1	0	0	0	1	0	0	0	1	0	1.8	1.8	1.8	62.586	557	557	3			1		0.0085925	6.1918	0	0	1.8	0	8018300	0	0	8018300	0	0	0	0	0
P51660	P51660	5	5	5	Peroxisomal multifunctional enzyme type 2;(3R)-hydroxyacyl-CoA dehydrogenase;Enoyl-CoA hydratase 2	Hsd17b4	sp|P51660|DHB4_MOUSE Peroxisomal multifunctional enzyme type 2 OS=Mus musculus OX=10090 GN=Hsd17b4 PE=1 SV=3	1	5	5	5	3	5	4	4	3	5	4	4	3	5	4	4	7.2	7.2	7.2	79.481	735	735	2.64	4	1	16	1	0	40.667	4.5	7.2	6.1	6.1	224170000	25128000	96504000	56956000	45576000	30167000	54794000	47061000	53832000
P51830	P51830	6	6	6	Adenylate cyclase type 9	Adcy9	sp|P51830|ADCY9_MOUSE Adenylate cyclase type 9 OS=Mus musculus OX=10090 GN=Adcy9 PE=1 SV=1	1	6	6	6	0	4	0	3	0	4	0	3	0	4	0	3	5	5	5	150.95	1353	1353	1	7				0	41.38	0	3.2	0	2.4	72412000	0	39426000	0	32986000	0	0	0	0
P51855	P51855	2	2	2	Glutathione synthetase	Gss	sp|P51855|GSHB_MOUSE Glutathione synthetase OS=Mus musculus OX=10090 GN=Gss PE=1 SV=1	1	2	2	2	0	0	1	2	0	0	1	2	0	0	1	2	3.8	3.8	3.8	52.246	474	474	2		3			0.001051	12.348	0	0	1.9	3.8	20268000	0	0	8135700	12132000	0	0	0	0
P51863	P51863	10	10	10	V-type proton ATPase subunit d 1	Atp6v0d1	sp|P51863|VA0D1_MOUSE V-type proton ATPase subunit d 1 OS=Mus musculus OX=10090 GN=Atp6v0d1 PE=1 SV=2	1	10	10	10	5	7	7	6	5	7	7	6	5	7	7	6	31.3	31.3	31.3	40.301	351	351	2.8	4	10	28	8	0	95.282	14.2	20.8	21.4	21.9	4334800000	699270000	749380000	1637900000	1248300000	588790000	414910000	999720000	1227500000
P51881	P51881	14	6	6	ADP/ATP translocase 2;ADP/ATP translocase 2, N-terminally processed	Slc25a5	sp|P51881|ADT2_MOUSE ADP/ATP translocase 2 OS=Mus musculus OX=10090 GN=Slc25a5 PE=1 SV=3	1	14	6	6	12	11	13	10	5	5	6	5	5	5	6	5	41.3	17.4	17.4	32.931	298	298	2.52	19	12	27	15	0	137.12	40.6	35.2	35.9	32.9	16262000000	3242500000	7793200000	2671600000	2554500000	2858700000	4986800000	2517900000	3502300000
P52196	P52196	6	6	6	Thiosulfate sulfurtransferase	Tst	sp|P52196|THTR_MOUSE Thiosulfate sulfurtransferase OS=Mus musculus OX=10090 GN=Tst PE=1 SV=3	1	6	6	6	6	6	5	5	6	6	5	5	6	6	5	5	26.9	26.9	26.9	33.466	297	297	3.05			21	1	0	54.342	26.9	26.9	20.5	23.6	1057900000	205130000	378740000	279290000	194720000	192720000	261350000	259070000	252450000
P52480;P53657	P52480	31;1	31;1	31;1	Pyruvate kinase PKM	Pkm	sp|P52480|KPYM_MOUSE Pyruvate kinase PKM OS=Mus musculus OX=10090 GN=Pkm PE=1 SV=4	2	31	31	31	17	20	25	30	17	20	25	30	17	20	25	30	57.6	57.6	57.6	57.844	531	531;574	2.24	45	111	41	29	0	323.31	37.9	43.9	45.8	57.6	38242000000	3737200000	3152100000	16096000000	15256000000	1576100000	1862100000	2328100000	2260400000
P52503	P52503	3	3	3	NADH dehydrogenase [ubiquinone] iron-sulfur protein 6, mitochondrial	Ndufs6	sp|P52503|NDUS6_MOUSE NADH dehydrogenase [ubiquinone] iron-sulfur protein 6, mitochondrial OS=Mus musculus OX=10090 GN=Ndufs6 PE=1 SV=2	1	3	3	3	1	3	0	0	1	3	0	0	1	3	0	0	20.7	20.7	20.7	13.02	116	116	4				4	0.0013812	20.271	8.6	20.7	0	0	238880000	36813000	202070000	0	0	0	0	0	0
P52760	P52760	3	3	3	Ribonuclease UK114	Hrsp12	sp|P52760|RIDA_MOUSE 2-iminobutanoate/2-iminopropanoate deaminase OS=Mus musculus OX=10090 GN=Rida PE=1 SV=3	1	3	3	3	3	3	2	2	3	3	2	2	3	3	2	2	26.7	26.7	26.7	14.255	135	135	4				10	0	28.032	26.7	26.7	14.8	14.8	465900000	93879000	259900000	58827000	53291000	131320000	157590000	168290000	176760000
P52825	P52825	1	1	1	Carnitine O-palmitoyltransferase 2, mitochondrial	Cpt2	sp|P52825|CPT2_MOUSE Carnitine O-palmitoyltransferase 2, mitochondrial OS=Mus musculus OX=10090 GN=Cpt2 PE=1 SV=2	1	1	1	1	0	0	1	0	0	0	1	0	0	0	1	0	1.5	1.5	1.5	73.98	658	658	2		1			0.0021853	6.6902	0	0	1.5	0	3596900	0	0	3596900	0	0	0	0	0
P53026	P53026	7	7	7	60S ribosomal protein L10a	Rpl10a	sp|P53026|RL10A_MOUSE 60S ribosomal protein L10a OS=Mus musculus OX=10090 GN=Rpl10a PE=1 SV=3	1	7	7	7	5	5	4	3	5	5	4	3	5	5	4	3	27.6	27.6	27.6	24.916	217	217	3			18		0	45.542	25.8	27.6	16.1	13.4	601490000	154430000	268850000	90920000	87294000	192220000	268830000	121760000	199270000
P53395	P53395	3	3	3	Lipoamide acyltransferase component of branched-chain alpha-keto acid dehydrogenase complex, mitochondrial	Dbt	sp|P53395|ODB2_MOUSE Lipoamide acyltransferase component of branched-chain alpha-keto acid dehydrogenase complex, mitochondrial OS=Mus musculus OX=10090 GN=Dbt PE=1 SV=2	1	3	3	3	0	0	1	3	0	0	1	3	0	0	1	3	7.9	7.9	7.9	53.246	482	482	2		4			0.0013141	18.838	0	0	2.5	7.9	45721000	0	0	12852000	32870000	0	0	0	0
P53612	P53612	5	5	5	Geranylgeranyl transferase type-2 subunit beta	Rabggtb	sp|P53612|PGTB2_MOUSE Geranylgeranyl transferase type-2 subunit beta OS=Mus musculus OX=10090 GN=Rabggtb PE=1 SV=2	1	5	5	5	1	3	0	1	1	3	0	1	1	3	0	1	14.5	14.5	14.5	37.803	339	339	3			5		0	30.023	2.9	8.8	0	2.7	36880000	5549600	27312000	0	4018500	0	0	0	0
P53690	P53690	1	1	1	Matrix metalloproteinase-14	Mmp14	sp|P53690|MMP14_MOUSE Matrix metalloproteinase-14 OS=Mus musculus OX=10090 GN=Mmp14 PE=2 SV=3	1	1	1	1	1	0	0	0	1	0	0	0	1	0	0	0	1.9	1.9	1.9	65.918	582	582	3			1		1	-2	1.9	0	0	0	26361000	26361000	0	0	0	0	0	0	0
P53810	P53810	8	8	8	Phosphatidylinositol transfer protein alpha isoform	Pitpna	sp|P53810|PIPNA_MOUSE Phosphatidylinositol transfer protein alpha isoform OS=Mus musculus OX=10090 GN=Pitpna PE=1 SV=2	1	8	8	8	2	7	3	3	2	7	3	3	2	7	3	3	41.3	41.3	41.3	31.893	271	271	3			18		0	54.438	13.3	39.1	14.8	17.7	995600000	88832000	480920000	267800000	158040000	222130000	365100000	211770000	348810000
P53986	P53986	2	2	2	Monocarboxylate transporter 1	Slc16a1	sp|P53986|MOT1_MOUSE Monocarboxylate transporter 1 OS=Mus musculus OX=10090 GN=Slc16a1 PE=1 SV=1	1	2	2	2	0	1	0	2	0	1	0	2	0	1	0	2	4.5	4.5	4.5	53.267	493	493	1.4	3	2			0.0010183	11.989	0	1.8	0	4.5	57725000	0	13802000	0	43923000	0	0	0	0
P53994	P53994	10	10	4	Ras-related protein Rab-2A	Rab2a	sp|P53994|RAB2A_MOUSE Ras-related protein Rab-2A OS=Mus musculus OX=10090 GN=Rab2a PE=1 SV=1	1	10	10	4	10	9	6	6	10	9	6	6	4	3	2	2	55.2	55.2	24.5	23.547	212	212	3.23			40	12	0	133.22	55.2	48.6	34.4	34.4	2836800000	787970000	1383300000	376700000	288800000	564810000	652270000	279160000	348340000
P54071	P54071	9	9	8	Isocitrate dehydrogenase [NADP], mitochondrial	Idh2	sp|P54071|IDHP_MOUSE Isocitrate dehydrogenase [NADP], mitochondrial OS=Mus musculus OX=10090 GN=Idh2 PE=1 SV=3	1	9	9	8	1	2	6	8	1	2	6	8	1	2	5	8	22.1	22.1	20.1	50.906	452	452	2.16		17	1	1	0	68.903	2.9	4.6	13.5	20.1	502760000	151080000	5878900	168220000	177580000	0	33388000	54691000	68071000
P54227	P54227	6	6	5	Stathmin	Stmn1	sp|P54227|STMN1_MOUSE Stathmin OS=Mus musculus OX=10090 GN=Stmn1 PE=1 SV=2	1	6	6	5	6	5	1	1	6	5	1	1	5	4	1	0	30.2	30.2	24.2	17.274	149	149	3.87			2	13	0	55.96	30.2	30.2	8.7	6	886030000	476410000	332830000	40118000	36672000	525010000	281650000	0	0
P54285	P54285	5	5	4	Voltage-dependent L-type calcium channel subunit beta-3	Cacnb3	sp|P54285|CACB3_MOUSE Voltage-dependent L-type calcium channel subunit beta-3 OS=Mus musculus OX=10090 GN=Cacnb3 PE=1 SV=2	1	5	5	4	0	0	3	5	0	0	3	5	0	0	3	4	14	14	12	54.571	484	484	2		9			0	33.324	0	0	8.3	14	110670000	0	0	51447000	59228000	0	0	27986000	27306000
P54728;P54726	P54728	5;1	5;1	5;1	UV excision repair protein RAD23 homolog B	Rad23b	sp|P54728|RD23B_MOUSE UV excision repair protein RAD23 homolog B OS=Mus musculus OX=10090 GN=Rad23b PE=1 SV=2	2	5	5	5	0	0	4	3	0	0	4	3	0	0	4	3	11.5	11.5	11.5	43.512	416	416;363	2		7			0	30.345	0	0	9.1	6.5	155850000	0	0	90647000	65207000	0	0	0	0
P54775	P54775	5	5	5	26S protease regulatory subunit 6B	Psmc4	sp|P54775|PRS6B_MOUSE 26S proteasome regulatory subunit 6B OS=Mus musculus OX=10090 GN=Psmc4 PE=1 SV=2	1	5	5	5	1	1	3	4	1	1	3	4	1	1	3	4	12.9	12.9	12.9	47.408	418	418	2.22		7	2		0	30.007	3.1	2.2	7.9	10.3	129500000	9697400	6619000	48819000	64367000	0	0	26404000	28846000
P54822	P54822	2	2	2	Adenylosuccinate lyase	Adsl	sp|P54822|PUR8_MOUSE Adenylosuccinate lyase OS=Mus musculus OX=10090 GN=Adsl PE=1 SV=2	1	2	2	2	0	0	0	2	0	0	0	2	0	0	0	2	4.5	4.5	4.5	54.866	484	484	2		2			0.0010543	12.393	0	0	0	4.5	37893000	0	0	0	37893000	0	0	0	0
P54823	P54823	3	3	3	Probable ATP-dependent RNA helicase DDX6	Ddx6	sp|P54823|DDX6_MOUSE Probable ATP-dependent RNA helicase DDX6 OS=Mus musculus OX=10090 GN=Ddx6 PE=1 SV=1	1	3	3	3	0	0	1	3	0	0	1	3	0	0	1	3	7.7	7.7	7.7	54.191	483	483	2		4			0.0014015	21.047	0	0	2.9	7.7	94474000	0	0	16409000	78065000	0	0	0	0
P55012;P55014	P55012	6;1	6;1	6;1	Solute carrier family 12 member 2	Slc12a2	sp|P55012|S12A2_MOUSE Solute carrier family 12 member 2 OS=Mus musculus OX=10090 GN=Slc12a2 PE=1 SV=2	2	6	6	6	0	5	0	4	0	5	0	4	0	5	0	4	6.5	6.5	6.5	131.03	1205	1205;1095	1	9				0	36.884	0	5.5	0	4.5	78455000	0	41258000	0	37197000	0	17818000	0	17945000
P55066	P55066	11	11	11	Neurocan core protein	Ncan	sp|P55066|NCAN_MOUSE Neurocan core protein OS=Mus musculus OX=10090 GN=Ncan PE=1 SV=1	1	11	11	11	4	7	8	9	4	7	8	9	4	7	8	9	9	9	9	137.2	1268	1268	1.46	26	3	5	1	0	239.49	3.2	6.3	6.3	7.2	1040600000	91381000	439230000	229620000	280410000	176710000	126240000	134610000	132190000
P55088	P55088	3	3	3	Aquaporin-4	Aqp4	sp|P55088|AQP4_MOUSE Aquaporin-4 OS=Mus musculus OX=10090 GN=Aqp4 PE=1 SV=2	1	3	3	3	1	3	1	2	1	3	1	2	1	3	1	2	9	9	9	34.436	323	323	1.7	6	1	3		0.0013957	20.809	3.1	9	3.1	5.9	85842000	7558800	46559000	8987600	22737000	0	23575000	0	27887000
P55258	P55258	4	2	2	Ras-related protein Rab-8A	Rab8a	sp|P55258|RAB8A_MOUSE Ras-related protein Rab-8A OS=Mus musculus OX=10090 GN=Rab8a PE=1 SV=2	1	4	2	2	2	4	2	2	0	2	0	0	0	2	0	0	18.8	9.7	9.7	23.668	207	207	3			2		0.0010422	12.257	9.2	18.8	9.2	9.2	37782000	0	37782000	0	0	0	0	0	0
P55264	P55264	4	4	4	Adenosine kinase	Adk	sp|P55264|ADK_MOUSE Adenosine kinase OS=Mus musculus OX=10090 GN=Adk PE=1 SV=2	1	4	4	4	1	0	4	3	1	0	4	3	1	0	4	3	8.6	8.6	8.6	40.148	361	361	2.12		7	1		0	30.83	3	0	8.6	8.3	124550000	2994500	0	53955000	67604000	0	0	31606000	43002000
P55302	P55302	3	3	3	Alpha-2-macroglobulin receptor-associated protein	Lrpap1	sp|P55302|AMRP_MOUSE Alpha-2-macroglobulin receptor-associated protein OS=Mus musculus OX=10090 GN=Lrpap1 PE=1 SV=1	1	3	3	3	0	0	1	3	0	0	1	3	0	0	1	3	11.1	11.1	11.1	42.215	360	360	2		4			0.001292	18.558	0	0	3.1	11.1	35163000	0	0	8466700	26697000	0	0	0	0
P55821	P55821	3	2	2	Stathmin-2	Stmn2	sp|P55821|STMN2_MOUSE Stathmin-2 OS=Mus musculus OX=10090 GN=Stmn2 PE=1 SV=1	1	3	2	2	3	3	1	1	2	2	1	0	2	2	1	0	16.2	11.2	11.2	20.828	179	179	3.6			2	3	0	38.502	16.2	16.2	5.6	5	288050000	36292000	70373000	181380000	0	105660000	99637000	0	0
P56135	P56135	4	4	4	ATP synthase subunit f, mitochondrial	Atp5j2	sp|P56135|ATPK_MOUSE ATP synthase subunit f, mitochondrial OS=Mus musculus OX=10090 GN=Atp5mf PE=1 SV=3	1	4	4	4	4	4	3	2	4	4	3	2	4	4	3	2	36.4	36.4	36.4	10.344	88	88	3.45	3	1		16	0	48.236	36.4	36.4	23.9	23.9	2821300000	734820000	1348600000	399560000	338320000	1469100000	979650000	1068900000	1403200000
P56212;P60840	P56212;P60840	1;1	1;1	1;1	cAMP-regulated phosphoprotein 19;Alpha-endosulfine	Arpp19;Ensa	sp|P56212|ARP19_MOUSE cAMP-regulated phosphoprotein 19 OS=Mus musculus OX=10090 GN=Arpp19 PE=1 SV=2;sp|P60840|ENSA_MOUSE Alpha-endosulfine OS=Mus musculus OX=10090 GN=Ensa PE=1 SV=1	2	1	1	1	1	1	0	0	1	1	0	0	1	1	0	0	9.8	9.8	9.8	12.293	112	112;121	4				2	0.0034261	6.428	9.8	9.8	0	0	36387000	17999000	18388000	0	0	0	0	0	0
P56371	P56371	4	2	2	Ras-related protein Rab-4A	Rab4a	sp|P56371|RAB4A_MOUSE Ras-related protein Rab-4A OS=Mus musculus OX=10090 GN=Rab4a PE=1 SV=2	1	4	2	2	2	3	2	2	0	2	1	1	0	2	1	1	18.3	11.9	11.9	24.408	218	218	3			4		0.0010793	12.748	10.6	18.3	11.5	11.5	64099000	0	40202000	14556000	9341600	0	0	0	0
P56376	P56376	3	3	3	Acylphosphatase-1	Acyp1	sp|P56376|ACYP1_MOUSE Acylphosphatase-1 OS=Mus musculus OX=10090 GN=Acyp1 PE=1 SV=2	1	3	3	3	1	2	0	1	1	2	0	1	1	2	0	1	40.4	40.4	40.4	11.241	99	99	4				4	0	33.298	13.1	27.3	0	13.1	152240000	9161800	124300000	0	18777000	0	0	0	0
P56379	P56379	1	1	1	6.8 kDa mitochondrial proteolipid	Mp68	sp|P56379|ATP68_MOUSE ATP synthase subunit ATP5MJ, mitochondrial OS=Mus musculus OX=10090 GN=Atp5mj PE=1 SV=1	1	1	1	1	1	1	1	1	1	1	1	1	1	1	1	1	13.8	13.8	13.8	6.6979	58	58	4				11	0.00071788	22.729	13.8	13.8	13.8	13.8	395750000	154470000	169980000	17160000	54147000	239580000	177420000	0	175700000
P56380	P56380	2	2	2	Bis(5-nucleosyl)-tetraphosphatase [asymmetrical]	Nudt2	sp|P56380|AP4A_MOUSE Bis(5-nucleosyl)-tetraphosphatase [asymmetrical] OS=Mus musculus OX=10090 GN=Nudt2 PE=1 SV=3	1	2	2	2	1	2	1	1	1	2	1	1	1	2	1	1	17	17	17	16.989	147	147	4				5	0.0011614	16.365	10.2	17	10.2	10.2	77940000	14474000	46724000	8144200	8597400	0	0	0	0
P56382	P56382	2	2	2	ATP synthase subunit epsilon, mitochondrial	Atp5e	sp|P56382|ATP5E_MOUSE ATP synthase subunit epsilon, mitochondrial OS=Mus musculus OX=10090 GN=Atp5f1e PE=1 SV=2	1	2	2	2	1	1	2	0	1	1	2	0	1	1	2	0	30.8	30.8	30.8	5.8378	52	52	4				4	0.00098961	11.717	15.4	15.4	30.8	0	134970000	31230000	51798000	51942000	0	0	0	0	0
P56391	P56391	2	2	2	Cytochrome c oxidase subunit 6B1	Cox6b1	sp|P56391|CX6B1_MOUSE Cytochrome c oxidase subunit 6B1 OS=Mus musculus OX=10090 GN=Cox6b1 PE=1 SV=2	1	2	2	2	2	2	2	2	2	2	2	2	2	2	2	2	11.6	11.6	11.6	10.071	86	86	4				8	0.0012563	17.966	11.6	11.6	11.6	11.6	752130000	259680000	298920000	92910000	100610000	445050000	282700000	252190000	325570000
P56395	P56395	3	3	3	Cytochrome b5	Cyb5a	sp|P56395|CYB5_MOUSE Cytochrome b5 OS=Mus musculus OX=10090 GN=Cyb5a PE=1 SV=2	1	3	3	3	3	3	2	3	3	3	2	3	3	3	2	3	25.4	25.4	25.4	15.241	134	134	4				11	0	42.539	25.4	25.4	15.7	25.4	437630000	116850000	208700000	35716000	76364000	165480000	173690000	184640000	217890000
P56399	P56399	17	17	17	Ubiquitin carboxyl-terminal hydrolase 5	Usp5	sp|P56399|UBP5_MOUSE Ubiquitin carboxyl-terminal hydrolase 5 OS=Mus musculus OX=10090 GN=Usp5 PE=1 SV=1	1	17	17	17	5	16	5	10	5	16	5	10	5	16	5	10	26.1	26.1	26.1	95.832	858	858	1.63	31	8	7	3	0	148.53	8.2	24.2	7.9	14.8	1448200000	137860000	791840000	230550000	287960000	164300000	119180000	147090000	86831000
P56480	P56480	23	23	23	ATP synthase subunit beta, mitochondrial	Atp5b	sp|P56480|ATPB_MOUSE ATP synthase subunit beta, mitochondrial OS=Mus musculus OX=10090 GN=Atp5f1b PE=1 SV=2	1	23	23	23	17	20	22	23	17	20	22	23	17	20	22	23	66	66	66	56.3	529	529	2.44	20	128	75	27	0	323.31	38.9	48.8	62.9	66	70132000000	11112000000	5810700000	24524000000	28684000000	2964600000	2491100000	2620800000	2816300000
P56564;O35544	P56564	4;1	4;1	4;1	Excitatory amino acid transporter 1	Slc1a3	sp|P56564|EAA1_MOUSE Excitatory amino acid transporter 1 OS=Mus musculus OX=10090 GN=Slc1a3 PE=1 SV=2	2	4	4	4	2	4	3	4	2	4	3	4	2	4	3	4	10.7	10.7	10.7	59.622	543	543;561	1.61	16	14	3		0	115.11	6.4	10.7	8.5	10.7	5273500000	372590000	784650000	1864400000	2251900000	1503100000	920640000	970950000	1179100000
P56695	P56695	3	3	3	Wolframin	Wfs1	sp|P56695|WFS1_MOUSE Wolframin OS=Mus musculus OX=10090 GN=Wfs1 PE=1 SV=1	1	3	3	3	0	2	1	0	0	2	1	0	0	2	1	0	3.1	3.1	3.1	100.58	890	890	1	3				0.0012099	17.523	0	1.9	1.2	0	31502000	0	22093000	9408300	0	0	0	0	0
P56812	P56812	2	2	2	Programmed cell death protein 5	Pdcd5	sp|P56812|PDCD5_MOUSE Programmed cell death protein 5 OS=Mus musculus OX=10090 GN=Pdcd5 PE=1 SV=3	1	2	2	2	2	2	0	0	2	2	0	0	2	2	0	0	16.7	16.7	16.7	14.275	126	126	4				4	0.0011299	13.994	16.7	16.7	0	0	47218000	25505000	21713000	0	0	54212000	21833000	0	0
P56959	P56959	2	2	2	RNA-binding protein FUS	Fus	sp|P56959|FUS_MOUSE RNA-binding protein FUS OS=Mus musculus OX=10090 GN=Fus PE=1 SV=1	1	2	2	2	1	0	1	2	1	0	1	2	1	0	1	2	4.8	4.8	4.8	52.673	518	518	2.25		3	1		0.0010152	11.949	1.7	0	1.7	4.8	92467000	11323000	0	12865000	68279000	0	0	0	0
P57716	P57716	2	2	2	Nicastrin	Ncstn	sp|P57716|NICA_MOUSE Nicastrin OS=Mus musculus OX=10090 GN=Ncstn PE=1 SV=3	1	2	2	2	0	2	0	1	0	2	0	1	0	2	0	1	2.4	2.4	2.4	78.491	708	708	1	3				0.0014071	11.311	0	2.4	0	1.1	29890000	0	27115000	0	2774400	0	0	0	0
P57746	P57746	12	12	12	V-type proton ATPase subunit D	Atp6v1d	sp|P57746|VATD_MOUSE V-type proton ATPase subunit D OS=Mus musculus OX=10090 GN=Atp6v1d PE=1 SV=1	1	12	12	12	7	10	8	6	7	10	8	6	7	10	8	6	51	51	51	28.369	247	247	3.22			38	11	0	165.31	34.8	43.7	37.7	30.4	3270400000	746490000	1291500000	899580000	332790000	806980000	753270000	643450000	632290000
P57759	P57759	3	3	3	Endoplasmic reticulum resident protein 29	Erp29	sp|P57759|ERP29_MOUSE Endoplasmic reticulum resident protein 29 OS=Mus musculus OX=10090 GN=Erp29 PE=1 SV=2	1	3	3	3	0	3	2	1	0	3	2	1	0	3	2	1	11.8	11.8	11.8	28.823	262	262	3			6		0.0012995	18.715	0	11.8	7.3	3.4	158390000	0	100890000	40498000	16999000	0	101200000	93122000	0
P57776	P57776	5	5	5	Elongation factor 1-delta	Eef1d	sp|P57776|EF1D_MOUSE Elongation factor 1-delta OS=Mus musculus OX=10090 GN=Eef1d PE=1 SV=3	1	5	5	5	0	3	3	0	0	3	3	0	0	3	3	0	19.6	19.6	19.6	31.293	281	281	2.5	2		6		0	31.537	0	13.2	11	0	144590000	0	89717000	54874000	0	0	0	0	0
P57780	P57780	37	24	23	Alpha-actinin-4	Actn4	sp|P57780|ACTN4_MOUSE Alpha-actinin-4 OS=Mus musculus OX=10090 GN=Actn4 PE=1 SV=1	1	37	24	23	9	35	20	23	4	22	10	13	4	21	10	12	40.8	27.1	26	104.98	912	912	1.34	47	4	5	2	0	179.73	11.4	39.9	22.6	26.1	1846600000	87029000	1082500000	208220000	468840000	81594000	172980000	83401000	131110000
P57784	P57784	4	4	4	U2 small nuclear ribonucleoprotein A	Snrpa1	sp|P57784|RU2A_MOUSE U2 small nuclear ribonucleoprotein A OS=Mus musculus OX=10090 GN=Snrpa1 PE=1 SV=2	1	4	4	4	1	2	2	0	1	2	2	0	1	2	2	0	14.1	14.1	14.1	28.357	255	255	3			5		0.00075019	24.174	4.3	7.1	6.3	0	46053000	8584800	12866000	24602000	0	0	0	0	0
P58021	P58021	2	2	2	Transmembrane 9 superfamily member 2	Tm9sf2	sp|P58021|TM9S2_MOUSE Transmembrane 9 superfamily member 2 OS=Mus musculus OX=10090 GN=Tm9sf2 PE=1 SV=1	1	2	2	2	0	1	0	2	0	1	0	2	0	1	0	2	3.5	3.5	3.5	75.329	662	662	1.33	2	1			0.001077	12.675	0	2.1	0	3.5	24334000	0	8914800	0	15419000	0	0	0	0
P58044	P58044	4	4	4	Isopentenyl-diphosphate Delta-isomerase 1	Idi1	sp|P58044|IDI1_MOUSE Isopentenyl-diphosphate Delta-isomerase 1 OS=Mus musculus OX=10090 GN=Idi1 PE=1 SV=1	1	4	4	4	1	4	2	0	1	4	2	0	1	4	2	0	19.4	19.4	19.4	26.289	227	227	3			7		0.0007722	24.908	5.3	19.4	9.3	0	140490000	11775000	90614000	38106000	0	0	68599000	54480000	0
P58252	P58252	24	24	23	Elongation factor 2	Eef2	sp|P58252|EF2_MOUSE Elongation factor 2 OS=Mus musculus OX=10090 GN=Eef2 PE=1 SV=2	1	24	24	23	9	22	10	16	9	22	10	16	8	21	9	15	30	30	28.8	95.313	858	858	1.65	51	15	17	2	0	209.38	11.3	27.6	12.4	20	2471300000	189850000	1179100000	304530000	797850000	168370000	179770000	125410000	163060000
P58281	P58281	28	28	28	Dynamin-like 120 kDa protein, mitochondrial;Dynamin-like 120 kDa protein, form S1	Opa1	sp|P58281|OPA1_MOUSE Dynamin-like 120 kDa protein, mitochondrial OS=Mus musculus OX=10090 GN=Opa1 PE=1 SV=1	1	28	28	28	1	23	8	18	1	23	8	18	1	23	8	18	31.7	31.7	31.7	111.34	960	960	1.17	54	9	1		0	323.31	1.1	27.1	10.7	21	1695000000	9189400	939200000	178150000	568490000	0	104690000	79369000	99184000
P58389	P58389	3	3	3	Serine/threonine-protein phosphatase 2A activator	Ppp2r4	sp|P58389|PTPA_MOUSE Serine/threonine-protein phosphatase 2A activator OS=Mus musculus OX=10090 GN=Ptpa PE=1 SV=1	1	3	3	3	3	1	3	3	3	1	3	3	3	1	3	3	10.2	10.2	10.2	36.71	323	323	2.67		6	8	1	0	31.211	10.2	3.1	10.2	10.2	413280000	42377000	8245100	198060000	164590000	68241000	0	103280000	106190000
P58404	P58404	2	2	2	Striatin-4	Strn4	sp|P58404|STRN4_MOUSE Striatin-4 OS=Mus musculus OX=10090 GN=Strn4 PE=1 SV=2	1	2	2	2	1	1	1	2	1	1	1	2	1	1	1	2	2.9	2.9	2.9	81.644	760	760	1.67	3	2	1		0.0010493	12.325	1.2	1.2	1.2	2.9	46248000	3995000	12940000	4623900	24689000	0	0	0	0
P58710	P58710	1	1	1	L-gulonolactone oxidase	Gulo	sp|P58710|GGLO_MOUSE L-gulonolactone oxidase OS=Mus musculus OX=10090 GN=Gulo PE=1 SV=3	1	1	1	1	0	0	1	1	0	0	1	1	0	0	1	1	1.6	1.6	1.6	50.478	440	440	2.5		1	1		0	38.329	0	0	1.6	1.6	430050000	0	0	370690000	59358000	0	0	0	0
P58771	P58771	9	4	4	Tropomyosin alpha-1 chain	Tpm1	sp|P58771|TPM1_MOUSE Tropomyosin alpha-1 chain OS=Mus musculus OX=10090 GN=Tpm1 PE=1 SV=1	1	9	4	4	5	8	5	4	2	3	1	1	2	3	1	1	20.8	10.9	10.9	32.68	284	284	3			7		0	30.084	12.3	20.8	13.7	12.3	214050000	85048000	83560000	29163000	16277000	0	0	0	0
P58871	P58871	2	2	2	182 kDa tankyrase-1-binding protein	Tnks1bp1	sp|P58871|TB182_MOUSE 182 kDa tankyrase-1-binding protein OS=Mus musculus OX=10090 GN=Tnks1bp1 PE=1 SV=2	1	2	2	2	0	2	0	0	0	2	0	0	0	2	0	0	1.8	1.8	1.8	181.82	1720	1720	1	2				0.0011186	13.535	0	1.8	0	0	24780000	0	24780000	0	0	0	0	0	0
P59016	P59016	1	1	1	Vacuolar protein sorting-associated protein 33B	Vps33b	sp|P59016|VP33B_MOUSE Vacuolar protein sorting-associated protein 33B OS=Mus musculus OX=10090 GN=Vps33b PE=1 SV=1	1	1	1	1	0	0	1	0	0	0	1	0	0	0	1	0	1.9	1.9	1.9	70.525	617	617	2		1			0.0034101	6.4111	0	0	1.9	0	4677900	0	0	4677900	0	0	0	0	0
P59017	P59017	2	2	2	Bcl-2-like protein 13	Bcl2l13	sp|P59017|B2L13_MOUSE Bcl-2-like protein 13 OS=Mus musculus OX=10090 GN=Bcl2l13 PE=1 SV=2	1	2	2	2	0	0	2	0	0	0	2	0	0	0	2	0	4.8	4.8	4.8	46.719	434	434	2		2			0.0011648	16.548	0	0	4.8	0	32253000	0	0	32253000	0	0	0	0	0
P59279	P59279	7	1	1	Ras-related protein Rab-2B	Rab2b	sp|P59279|RAB2B_MOUSE Ras-related protein Rab-2B OS=Mus musculus OX=10090 GN=Rab2b PE=1 SV=1	1	7	1	1	6	7	4	4	0	1	0	0	0	1	0	0	37	6.5	6.5	24.198	216	216	3			1		1	-2	30.6	37	24.1	24.1	120010000	0	120010000	0	0	0	0	0	0
P59281	P59281	2	2	2	Rho GTPase-activating protein 39	Arhgap39	sp|P59281|RHG39_MOUSE Rho GTPase-activating protein 39 OS=Mus musculus OX=10090 GN=Arhgap39 PE=1 SV=2	1	2	2	2	0	2	0	1	0	2	0	1	0	2	0	1	2	2	2	125.2	1107	1107	1	3				0.00098814	11.7	0	2	0	1.1	18301000	0	12956000	0	5344900	0	0	0	0
P59325	P59325	3	3	3	Eukaryotic translation initiation factor 5	Eif5	sp|P59325|IF5_MOUSE Eukaryotic translation initiation factor 5 OS=Mus musculus OX=10090 GN=Eif5 PE=1 SV=1	1	3	3	3	0	0	1	3	0	0	1	3	0	0	1	3	7	7	7	48.968	429	429	2		4			0.0013307	19.085	0	0	2.3	7	80996000	0	0	15204000	65792000	0	0	0	0
P59648	P59648	1	1	1	FXYD domain-containing ion transport regulator 7	Fxyd7	sp|P59648|FXYD7_MOUSE FXYD domain-containing ion transport regulator 7 OS=Mus musculus OX=10090 GN=Fxyd7 PE=3 SV=1	1	1	1	1	1	1	0	0	1	1	0	0	1	1	0	0	16.2	16.2	16.2	8.4867	80	80	3.5			2	2	0.0014065	21.287	16.2	16.2	0	0	476620000	203820000	272790000	0	0	0	0	0	0
P59999	P59999	5	5	5	Actin-related protein 2/3 complex subunit 4	Arpc4	sp|P59999|ARPC4_MOUSE Actin-related protein 2/3 complex subunit 4 OS=Mus musculus OX=10090 GN=Arpc4 PE=1 SV=3	1	5	5	5	5	4	4	4	5	4	4	4	5	4	4	4	29.8	29.8	29.8	19.667	168	168	3.32	2	2	9	15	0	51.287	29.8	22.6	22.6	25	3911100000	1340700000	1637900000	434040000	498410000	1094200000	1015100000	807630000	929390000
P60122	P60122	4	4	4	RuvB-like 1	Ruvbl1	sp|P60122|RUVB1_MOUSE RuvB-like 1 OS=Mus musculus OX=10090 GN=Ruvbl1 PE=1 SV=1	1	4	4	4	0	0	2	4	0	0	2	4	0	0	2	4	11.4	11.4	11.4	50.213	456	456	2		6			0.00075988	24.459	0	0	5.7	11.4	53588000	0	0	20378000	33210000	0	0	15576000	15699000
P60202	P60202	5	5	5	Myelin proteolipid protein	Plp1	sp|P60202|MYPR_MOUSE Myelin proteolipid protein OS=Mus musculus OX=10090 GN=Plp1 PE=1 SV=2	1	5	5	5	2	5	3	5	2	5	3	5	2	5	3	5	18.8	18.8	18.8	30.077	277	277	2.35	18	12	11	13	0	323.31	6.9	18.8	11.6	18.8	14598000000	285130000	6915800000	1807500000	5589800000	623180000	4014000000	1441200000	3742800000
P60229	P60229	2	2	2	Eukaryotic translation initiation factor 3 subunit E	Eif3e	sp|P60229|EIF3E_MOUSE Eukaryotic translation initiation factor 3 subunit E OS=Mus musculus OX=10090 GN=Eif3e PE=1 SV=1	1	2	2	2	0	0	2	2	0	0	2	2	0	0	2	2	3.8	3.8	3.8	52.22	445	445	2		4			0.0010504	12.333	0	0	3.8	3.8	19800000	0	0	6974900	12825000	0	0	5071200	8319700
P60335;P57724	P60335	4;1	3;0	3;0	Poly(rC)-binding protein 1	Pcbp1	sp|P60335|PCBP1_MOUSE Poly(rC)-binding protein 1 OS=Mus musculus OX=10090 GN=Pcbp1 PE=1 SV=1	2	4	3	3	2	1	3	4	2	1	2	3	2	1	2	3	14.9	12.6	12.6	37.497	356	356;403	2.38		6	1	1	0.0013784	20.196	6.7	3.7	9	14.9	310460000	54345000	12904000	110070000	133140000	125660000	0	158630000	115660000
P60469	P60469	16	16	15	Liprin-alpha-3	Ppfia3	sp|P60469|LIPA3_MOUSE Liprin-alpha-3 OS=Mus musculus OX=10090 GN=Ppfia3 PE=1 SV=2	1	16	16	15	2	13	4	5	2	13	4	5	2	12	4	5	15.6	15.6	14.7	133.42	1194	1194	1.2	21	3	1		0	112.72	2.1	13.7	4.2	4.4	341660000	9684800	222350000	37649000	71973000	0	40274000	13397000	28378000
P60487	P60487	9	9	9	Pyridoxal phosphate phosphatase	Pdxp	sp|P60487|PLPP_MOUSE Chronophin OS=Mus musculus OX=10090 GN=Pdxp PE=1 SV=1	1	9	9	9	5	9	5	4	5	9	5	4	5	9	5	4	37	37	37	31.512	292	292	3.24			22	7	0	63.853	19.9	37	19.9	16.4	871510000	145590000	468760000	153710000	103450000	179870000	219350000	176130000	195590000
P60521	P60521	5	5	4	Gamma-aminobutyric acid receptor-associated protein-like 2	Gabarapl2	sp|P60521|GBRL2_MOUSE Gamma-aminobutyric acid receptor-associated protein-like 2 OS=Mus musculus OX=10090 GN=Gabarapl2 PE=1 SV=1	1	5	5	4	2	4	0	2	2	4	0	2	2	3	0	2	29.1	29.1	23.1	13.667	117	117	4				8	0	75.615	17.1	22.2	0	17.1	174480000	58755000	98867000	0	16856000	116920000	0	0	65352000
P60710;P63260	P60710;P63260	19;19	19;19	6;6	Actin, cytoplasmic 1;Actin, cytoplasmic 1, N-terminally processed;Actin, cytoplasmic 2;Actin, cytoplasmic 2, N-terminally processed	Actb;Actg1	sp|P60710|ACTB_MOUSE Actin, cytoplasmic 1 OS=Mus musculus OX=10090 GN=Actb PE=1 SV=1;sp|P63260|ACTG_MOUSE Actin, cytoplasmic 2 OS=Mus musculus OX=10090 GN=Actg1 PE=1 SV=1	2	19	19	6	17	18	19	18	17	18	19	18	5	5	6	5	52.5	52.5	17.1	41.736	375	375;375	2.4	60	171	89	61	0	323.31	52.3	52.3	52.5	52.3	200120000000	37175000000	18078000000	76591000000	68272000000	18911000000	20053000000	19690000000	18800000000
P60766	P60766	4	3	3	Cell division control protein 42 homolog	Cdc42	sp|P60766|CDC42_MOUSE Cell division control protein 42 homolog OS=Mus musculus OX=10090 GN=Cdc42 PE=1 SV=2	1	4	3	3	0	4	0	2	0	3	0	2	0	3	0	2	25.7	19.9	19.9	21.258	191	191	3.38			5	3	0	37.904	0	25.7	0	11	362900000	0	271220000	0	91676000	0	219080000	0	301480000
P60843	P60843	12	5	5	Eukaryotic initiation factor 4A-I	Eif4a1	sp|P60843|IF4A1_MOUSE Eukaryotic initiation factor 4A-I OS=Mus musculus OX=10090 GN=Eif4a1 PE=1 SV=1	1	12	5	5	1	4	10	9	0	0	4	3	0	0	4	3	33.5	11.6	11.6	46.153	406	406	2		7			0	56.019	2.5	14.5	27.3	27.8	139810000	0	0	63261000	76546000	0	0	40307000	40257000
P60867	P60867	3	3	3	40S ribosomal protein S20	Rps20	sp|P60867|RS20_MOUSE 40S ribosomal protein S20 OS=Mus musculus OX=10090 GN=Rps20 PE=1 SV=1	1	3	3	3	3	3	2	3	3	3	2	3	3	3	2	3	22.7	22.7	22.7	13.373	119	119	4				13	0	32.632	22.7	22.7	19.3	22.7	824410000	210050000	434260000	89405000	90690000	294390000	387290000	268520000	331060000
P60879;O09044	P60879	19;1	19;1	19;1	Synaptosomal-associated protein 25	Snap25	sp|P60879|SNP25_MOUSE Synaptosomal-associated protein 25 OS=Mus musculus OX=10090 GN=Snap25 PE=1 SV=1	2	19	19	19	14	18	18	17	14	18	18	17	14	18	18	17	69.9	69.9	69.9	23.315	206	206;210	3.17			138	29	0	323.31	58.3	68.4	67	69.9	29387000000	4362100000	12714000000	8629100000	3682600000	4021300000	5410900000	3379400000	3910100000
P60904	P60904	8	8	8	DnaJ homolog subfamily C member 5	Dnajc5	sp|P60904|DNJC5_MOUSE DnaJ homolog subfamily C member 5 OS=Mus musculus OX=10090 GN=Dnajc5 PE=1 SV=1	1	8	8	8	5	7	5	4	5	7	5	4	5	7	5	4	37.4	37.4	37.4	22.101	198	198	2.56	6	5	28		0	153.15	34.8	37.4	37.4	24.7	6188700000	715530000	2073100000	2850200000	549870000	1474500000	2533500000	2140500000	1307800000
P61021	P61021	6	6	3	Ras-related protein Rab-5B	Rab5b	sp|P61021|RAB5B_MOUSE Ras-related protein Rab-5B OS=Mus musculus OX=10090 GN=Rab5b PE=1 SV=1	1	6	6	3	5	6	6	5	5	6	6	5	2	3	3	2	35.8	35.8	20.9	23.707	215	215	3.06	1		30	4	0	90.479	30.2	35.8	35.8	27	2581100000	654110000	895810000	659180000	371960000	1125000000	1051400000	941480000	904290000
P61022	P61022	3	3	3	Calcineurin B homologous protein 1	Chp1	sp|P61022|CHP1_MOUSE Calcineurin B homologous protein 1 OS=Mus musculus OX=10090 GN=Chp1 PE=1 SV=2	1	3	3	3	1	3	0	0	1	3	0	0	1	3	0	0	17.9	17.9	17.9	22.432	195	195	3			4		0.0012587	17.996	4.1	17.9	0	0	66248000	10919000	55330000	0	0	0	0	0	0
P61027	P61027	5	4	3	Ras-related protein Rab-10	Rab10	sp|P61027|RAB10_MOUSE Ras-related protein Rab-10 OS=Mus musculus OX=10090 GN=Rab10 PE=1 SV=1	1	5	4	3	4	5	4	4	3	4	3	3	3	3	2	3	25.5	20	16.5	22.541	200	200	3.06	1		13	3	0	37.963	22	25.5	19.5	22	1070100000	99620000	545770000	275570000	149120000	266510000	541940000	393990000	377740000
P61028	P61028	4	2	2	Ras-related protein Rab-8B	Rab8b	sp|P61028|RAB8B_MOUSE Ras-related protein Rab-8B OS=Mus musculus OX=10090 GN=Rab8b PE=1 SV=1	1	4	2	2	3	4	3	3	1	2	1	1	1	2	1	1	21.7	12.6	12.6	23.603	207	207	3			5		0.0010604	12.427	15.9	21.7	15.9	15	101160000	4434100	51848000	24395000	20480000	0	0	0	0
P61079;Q6ZWY6;P62838	P61079;Q6ZWY6;P62838	1;1;1	1;1;1	1;1;1	Ubiquitin-conjugating enzyme E2 D3;Ubiquitin-conjugating enzyme E2 D2B;Ubiquitin-conjugating enzyme E2 D2	Ube2d3;Ube2d2b;Ube2d2	sp|P61079|UB2D3_MOUSE Ubiquitin-conjugating enzyme E2 D3 OS=Mus musculus OX=10090 GN=Ube2d3 PE=1 SV=1;sp|Q6ZWY6|U2D2B_MOUSE Ubiquitin-conjugating enzyme E2 D2B OS=Mus musculus OX=10090 GN=Ube2d2b PE=1 SV=1;sp|P62838|UB2D2_MOUSE Ubiquitin-conjugating enzyme	3	1	1	1	1	1	1	0	1	1	1	0	1	1	1	0	7.5	7.5	7.5	16.687	147	147;147;147	4				3	0.0013902	11.115	7.5	7.5	7.5	0	326310000	128100000	166400000	31802000	0	0	0	0	0
P61082	P61082	5	5	5	NEDD8-conjugating enzyme Ubc12	Ube2m	sp|P61082|UBC12_MOUSE NEDD8-conjugating enzyme Ubc12 OS=Mus musculus OX=10090 GN=Ube2m PE=1 SV=1	1	5	5	5	1	5	2	1	1	5	2	1	1	5	2	1	21.3	21.3	21.3	20.9	183	183	3.4			6	4	0	290.66	4.9	21.3	10.4	4.4	237340000	37754000	131750000	54925000	12910000	0	0	0	0
P61087	P61087	3	3	3	Ubiquitin-conjugating enzyme E2 K	Ube2k	sp|P61087|UBE2K_MOUSE Ubiquitin-conjugating enzyme E2 K OS=Mus musculus OX=10090 GN=Ube2k PE=1 SV=3	1	3	3	3	1	2	2	1	1	2	2	1	1	2	2	1	14.5	14.5	14.5	22.406	200	200	3.14			6	1	0.0014134	21.505	5	8.5	11	5	110010000	16534000	37691000	44694000	11089000	0	0	0	0
P61089	P61089	6	6	6	Ubiquitin-conjugating enzyme E2 N	Ube2n	sp|P61089|UBE2N_MOUSE Ubiquitin-conjugating enzyme E2 N OS=Mus musculus OX=10090 GN=Ube2n PE=1 SV=1	1	6	6	6	4	6	4	5	4	6	4	5	4	6	4	5	48.7	48.7	48.7	17.138	152	152	3.95			1	21	0	323.31	33.6	48.7	33.6	43.4	2993000000	697930000	1354200000	562330000	378500000	1398900000	1162600000	831690000	1123600000
P61161	P61161	9	9	9	Actin-related protein 2	Actr2	sp|P61161|ARP2_MOUSE Actin-related protein 2 OS=Mus musculus OX=10090 GN=Actr2 PE=1 SV=1	1	9	9	9	2	4	5	8	2	4	5	8	2	4	5	8	29.2	29.2	29.2	44.76	394	394	2.38		17	5	2	0	82.703	6.3	14	15.5	27.4	939550000	124740000	42218000	335090000	437510000	246730000	105740000	182010000	245720000
P61202	P61202	5	5	5	COP9 signalosome complex subunit 2	Cops2	sp|P61202|CSN2_MOUSE COP9 signalosome complex subunit 2 OS=Mus musculus OX=10090 GN=Cops2 PE=1 SV=1	1	5	5	5	0	1	1	5	0	1	1	5	0	1	1	5	13.3	13.3	13.3	51.596	443	443	2		7			0	33.455	0	2.3	2.9	13.3	105700000	0	2330100	35481000	67889000	0	0	0	0
P61205;P84078;Q8BSL7	P61205;P84078;Q8BSL7	11;11;8	11;11;8	6;6;4	ADP-ribosylation factor 3;ADP-ribosylation factor 1;ADP-ribosylation factor 2	Arf3;Arf1;Arf2	sp|P61205|ARF3_MOUSE ADP-ribosylation factor 3 OS=Mus musculus OX=10090 GN=Arf3 PE=2 SV=2;sp|P84078|ARF1_MOUSE ADP-ribosylation factor 1 OS=Mus musculus OX=10090 GN=Arf1 PE=1 SV=2;sp|Q8BSL7|ARF2_MOUSE ADP-ribosylation factor 2 OS=Mus musculus OX=10090 GN=A	3	11	11	6	8	11	9	8	8	11	9	8	3	6	4	3	64.1	64.1	35.4	20.601	181	181;181;181	3.74	2		14	61	0	323.31	54.7	64.1	60.2	54.7	14763000000	3185000000	8710800000	1356900000	1510000000	2163100000	2853400000	2222300000	2112300000
P61211	P61211	2	2	2	ADP-ribosylation factor-like protein 1	Arl1	sp|P61211|ARL1_MOUSE ADP-ribosylation factor-like protein 1 OS=Mus musculus OX=10090 GN=Arl1 PE=1 SV=1	1	2	2	2	2	2	2	1	2	2	2	1	2	2	2	1	11	11	11	20.411	181	181	3.56			4	5	0.0010805	12.771	11	11	11	5	88448000	22516000	47821000	13566000	4544600	55741000	50373000	45205000	0
P61226;Q8BU31	P61226	5;2	5;2	3;0	Ras-related protein Rap-2b	Rap2b	sp|P61226|RAP2B_MOUSE Ras-related protein Rap-2b OS=Mus musculus OX=10090 GN=Rap2b PE=1 SV=1	2	5	5	3	3	5	2	2	3	5	2	2	1	3	0	1	31.1	31.1	19.7	20.504	183	183;183	3.47			10	9	0	61.322	16.4	31.1	11.5	12.6	806690000	183200000	419930000	120710000	82846000	320180000	214700000	285490000	352670000
P61255	P61255	5	5	5	60S ribosomal protein L26	Rpl26	sp|P61255|RL26_MOUSE 60S ribosomal protein L26 OS=Mus musculus OX=10090 GN=Rpl26 PE=1 SV=1	1	5	5	5	0	4	1	2	0	4	1	2	0	4	1	2	33.1	33.1	33.1	17.258	145	145	3.78			2	7	0	32.655	0	23.4	5.5	15.2	179910000	0	167070000	4171800	8665600	0	0	0	0
P61264;Q00262	P61264	19;1	19;1	18;0	Syntaxin-1B	Stx1b	sp|P61264|STX1B_MOUSE Syntaxin-1B OS=Mus musculus OX=10090 GN=Stx1b PE=1 SV=1	2	19	19	18	12	19	14	16	12	19	14	16	12	18	13	16	56.9	56.9	54.5	33.244	288	288;289	2.93	1	11	87	6	0	323.31	43.8	56.9	51.7	49.3	24026000000	2665600000	10730000000	6664600000	3965600000	1547800000	3995500000	2803100000	3172600000
P61294	P61294	10	3	3	Ras-related protein Rab-6B	Rab6b	sp|P61294|RAB6B_MOUSE Ras-related protein Rab-6B OS=Mus musculus OX=10090 GN=Rab6b PE=1 SV=1	1	10	3	3	6	10	7	6	0	3	0	0	0	3	0	0	50.5	21.2	21.2	23.461	208	208	3			4		0.0012788	18.258	26	50.5	29.3	26	166130000	0	166130000	0	0	0	0	0	0
P61329;P70379;P70377	P61329;P70379	3;2;1	3;2;1	3;2;1	Fibroblast growth factor 12;Fibroblast growth factor 14	Fgf12;Fgf14	sp|P61329|FGF12_MOUSE Fibroblast growth factor 12 OS=Mus musculus OX=10090 GN=Fgf12 PE=1 SV=1;sp|P70379|FGF14_MOUSE Fibroblast growth factor 14 OS=Mus musculus OX=10090 GN=Fgf14 PE=2 SV=1	3	3	3	3	0	1	1	1	0	1	1	1	0	1	1	1	10.7	10.7	10.7	27.399	243	243;247;245	3.33		1		2	0.0012415	17.867	0	3.3	4.1	3.3	279350000	0	8304600	266970000	4078600	0	0	0	0
P61358	P61358	5	5	5	60S ribosomal protein L27	Rpl27	sp|P61358|RL27_MOUSE 60S ribosomal protein L27 OS=Mus musculus OX=10090 GN=Rpl27 PE=1 SV=2	1	5	5	5	5	4	3	3	5	4	3	3	5	4	3	3	43.4	43.4	43.4	15.798	136	136	4				16	0	59.043	43.4	36	29.4	29.4	984800000	241900000	549180000	112350000	81371000	314080000	324900000	231040000	297780000
P61750	P61750	6	2	2	ADP-ribosylation factor 4	Arf4	sp|P61750|ARF4_MOUSE ADP-ribosylation factor 4 OS=Mus musculus OX=10090 GN=Arf4 PE=1 SV=2	1	6	2	2	4	5	4	6	0	1	0	2	0	1	0	2	38.3	9.4	9.4	20.396	180	180	4				3	0.0013899	20.508	28.9	34.4	28.9	38.3	106650000	0	78418000	0	28235000	0	0	0	0
P61759	P61759	1	1	1	Prefoldin subunit 3	Vbp1	sp|P61759|PFD3_MOUSE Prefoldin subunit 3 OS=Mus musculus OX=10090 GN=Vbp1 PE=1 SV=2	1	1	1	1	0	1	0	0	0	1	0	0	0	1	0	0	4.6	4.6	4.6	22.435	196	196	3			1		0.005059	6.3495	0	4.6	0	0	11805000	0	11805000	0	0	0	0	0	0
P61804	P61804	2	2	2	Dolichyl-diphosphooligosaccharide--protein glycosyltransferase subunit DAD1	Dad1	sp|P61804|DAD1_MOUSE Dolichyl-diphosphooligosaccharide--protein glycosyltransferase subunit DAD1 OS=Mus musculus OX=10090 GN=Dad1 PE=1 SV=3	1	2	2	2	0	2	0	0	0	2	0	0	0	2	0	0	19.5	19.5	19.5	12.497	113	113	4				2	0.000999	11.785	0	19.5	0	0	37166000	0	37166000	0	0	0	0	0	0
P61922	P61922	14	14	14	4-aminobutyrate aminotransferase, mitochondrial	Abat	sp|P61922|GABT_MOUSE 4-aminobutyrate aminotransferase, mitochondrial OS=Mus musculus OX=10090 GN=Abat PE=1 SV=1	1	14	14	14	6	3	9	14	6	3	9	14	6	3	9	14	38.4	38.4	38.4	56.451	500	500	2.4	2	29	8	6	0	119.68	16.4	9.2	26.6	38.4	3160500000	269950000	62040000	1015300000	1813200000	304010000	233310000	336750000	427650000
P61924	P61924	2	2	2	Coatomer subunit zeta-1	Copz1	sp|P61924|COPZ1_MOUSE Coatomer subunit zeta-1 OS=Mus musculus OX=10090 GN=Copz1 PE=1 SV=1	1	2	2	2	0	1	0	1	0	1	0	1	0	1	0	1	11.9	11.9	11.9	20.198	177	177	4				2	0.0014368	11.48	0	5.6	0	6.2	24971000	0	20306000	0	4665500	0	0	0	0
P61957;Q9Z172	P61957;Q9Z172	1;1	1;1	1;1	Small ubiquitin-related modifier 2;Small ubiquitin-related modifier 3	Sumo2;Sumo3	sp|P61957|SUMO2_MOUSE Small ubiquitin-related modifier 2 OS=Mus musculus OX=10090 GN=Sumo2 PE=1 SV=1;sp|Q9Z172|SUMO3_MOUSE Small ubiquitin-related modifier 3 OS=Mus musculus OX=10090 GN=Sumo3 PE=1 SV=1	2	1	1	1	1	1	0	0	1	1	0	0	1	1	0	0	12.6	12.6	12.6	10.871	95	95;110	4				2	0.0011772	17.023	12.6	12.6	0	0	121390000	41489000	79900000	0	0	0	0	0	0
P61967	P61967	2	2	2	AP-1 complex subunit sigma-1A	Ap1s1	sp|P61967|AP1S1_MOUSE AP-1 complex subunit sigma-1A OS=Mus musculus OX=10090 GN=Ap1s1 PE=1 SV=1	1	2	2	2	1	2	0	1	1	2	0	1	1	2	0	1	15.8	15.8	15.8	18.733	158	158	3.8			1	4	0.0011448	14.611	5.7	15.8	0	5.7	51387000	5852500	42880000	0	2654600	0	0	0	0
P61979	P61979	15	15	15	Heterogeneous nuclear ribonucleoprotein K	Hnrnpk	sp|P61979|HNRPK_MOUSE Heterogeneous nuclear ribonucleoprotein K OS=Mus musculus OX=10090 GN=Hnrnpk PE=1 SV=1	1	15	15	15	7	5	11	13	7	5	11	13	7	5	11	13	38.2	38.2	38.2	50.976	463	463	2.29	3	32	16	1	0	143.27	17.7	14.9	26.8	36.1	2939900000	236440000	213950000	1186500000	1303000000	450460000	225250000	344310000	375080000
P61982	P61982	11	6	6	14-3-3 protein gamma;14-3-3 protein gamma, N-terminally processed	Ywhag	sp|P61982|1433G_MOUSE 14-3-3 protein gamma OS=Mus musculus OX=10090 GN=Ywhag PE=1 SV=2	1	11	6	6	10	10	10	9	6	6	6	5	6	6	6	5	45.7	29.6	29.6	28.302	247	247	3	1	1	35	3	0	308.55	42.9	43.3	42.9	34.8	22911000000	3830100000	8823200000	6986400000	3271200000	4914200000	6836400000	6590100000	5518800000
P62075	P62075	1	1	1	Mitochondrial import inner membrane translocase subunit Tim13	Timm13	sp|P62075|TIM13_MOUSE Mitochondrial import inner membrane translocase subunit Tim13 OS=Mus musculus OX=10090 GN=Timm13 PE=1 SV=1	1	1	1	1	1	0	0	0	1	0	0	0	1	0	0	0	14.7	14.7	14.7	10.458	95	95	4				2	0.0013643	8.0537	14.7	0	0	0	88694000	88694000	0	0	0	0	0	0	0
P62082	P62082	6	6	6	40S ribosomal protein S7	Rps7	sp|P62082|RS7_MOUSE 40S ribosomal protein S7 OS=Mus musculus OX=10090 GN=Rps7 PE=2 SV=1	1	6	6	6	3	5	5	3	3	5	5	3	3	5	5	3	30.9	30.9	30.9	22.127	194	194	3.4			12	8	0	87.981	14.9	30.4	19.6	14.9	619270000	99613000	314050000	162260000	43359000	270840000	289090000	230760000	203950000
P62137	P62137	7	4	4	Serine/threonine-protein phosphatase PP1-alpha catalytic subunit	Ppp1ca	sp|P62137|PP1A_MOUSE Serine/threonine-protein phosphatase PP1-alpha catalytic subunit OS=Mus musculus OX=10090 GN=Ppp1ca PE=1 SV=1	1	7	4	4	2	3	7	3	1	1	4	1	1	1	4	1	21.8	12.4	12.4	37.54	330	330	2.78		2	7		0	30.849	7	12.1	21.8	12.1	232670000	18671000	18003000	155480000	40519000	0	0	0	0
P62141	P62141	8	8	4	Serine/threonine-protein phosphatase PP1-beta catalytic subunit	Ppp1cb	sp|P62141|PP1B_MOUSE Serine/threonine-protein phosphatase PP1-beta catalytic subunit OS=Mus musculus OX=10090 GN=Ppp1cb PE=1 SV=3	1	8	8	4	1	4	8	6	1	4	8	6	0	1	4	3	28.7	28.7	15.9	37.186	327	327	2.84		8	21	3	0	78.696	4.3	15.9	28.7	24.8	1399100000	134040000	256420000	667530000	341120000	0	207150000	473160000	537430000
P62192	P62192	5	5	5	26S protease regulatory subunit 4	Psmc1	sp|P62192|PRS4_MOUSE 26S proteasome regulatory subunit 4 OS=Mus musculus OX=10090 GN=Psmc1 PE=1 SV=1	1	5	5	5	0	0	2	5	0	0	2	5	0	0	2	5	15.2	15.2	15.2	49.184	440	440	2		7			0	30.465	0	0	4.8	15.2	166750000	0	0	47181000	119570000	0	0	39783000	35381000
P62196	P62196	7	7	7	26S protease regulatory subunit 8	Psmc5	sp|P62196|PRS8_MOUSE 26S proteasome regulatory subunit 8 OS=Mus musculus OX=10090 GN=Psmc5 PE=1 SV=1	1	7	7	7	1	0	4	6	1	0	4	6	1	0	4	6	20.4	20.4	20.4	45.626	406	406	2.08		12	1		0	46.591	3	0	9.9	18.2	248030000	18119000	0	101520000	128390000	0	0	40021000	41158000
P62242	P62242	7	7	7	40S ribosomal protein S8	Rps8	sp|P62242|RS8_MOUSE 40S ribosomal protein S8 OS=Mus musculus OX=10090 GN=Rps8 PE=1 SV=2	1	7	7	7	6	6	3	4	6	6	3	4	6	6	3	4	38	38	38	24.205	208	208	2.96		2	22	1	0	60.941	34.6	34.6	17.8	21.2	879880000	274100000	365770000	118740000	121270000	285330000	258140000	139350000	247720000
P62245	P62245	4	4	4	40S ribosomal protein S15a	Rps15a	sp|P62245|RS15A_MOUSE 40S ribosomal protein S15a OS=Mus musculus OX=10090 GN=Rps15a PE=1 SV=2	1	4	4	4	3	4	2	2	3	4	2	2	3	4	2	2	30.8	30.8	30.8	14.839	130	130	4				13	0	41.848	23.8	30.8	17.7	13.1	632560000	154970000	379800000	42034000	55760000	141720000	210550000	154100000	258910000
P62254	P62254	1	1	1	Ubiquitin-conjugating enzyme E2 G1;Ubiquitin-conjugating enzyme E2 G1, N-terminally processed	Ube2g1	sp|P62254|UB2G1_MOUSE Ubiquitin-conjugating enzyme E2 G1 OS=Mus musculus OX=10090 GN=Ube2g1 PE=1 SV=3	1	1	1	1	0	1	0	0	0	1	0	0	0	1	0	0	5.9	5.9	5.9	19.509	170	170	4				1	0.0013667	8.2205	0	5.9	0	0	4538000	0	4538000	0	0	0	0	0	0
P62259	P62259	23	23	21	14-3-3 protein epsilon	Ywhae	sp|P62259|1433E_MOUSE 14-3-3 protein epsilon OS=Mus musculus OX=10090 GN=Ywhae PE=1 SV=1	1	23	23	21	20	19	20	18	20	19	20	18	18	17	18	16	67.8	67.8	63.9	29.174	255	255	3.02	4	9	163	21	0	323.31	63.5	63.1	65.5	58	63296000000	15552000000	19586000000	18900000000	9258200000	13219000000	15153000000	13389000000	12801000000
P62264	P62264	4	4	4	40S ribosomal protein S14	Rps14	sp|P62264|RS14_MOUSE 40S ribosomal protein S14 OS=Mus musculus OX=10090 GN=Rps14 PE=1 SV=3	1	4	4	4	2	3	1	2	2	3	1	2	2	3	1	2	23.8	23.8	23.8	16.273	151	151	4				8	0	32.117	13.9	17.2	7.3	15.9	500790000	34931000	258120000	149480000	58257000	0	0	0	0
P62267	P62267	3	3	3	40S ribosomal protein S23	Rps23	sp|P62267|RS23_MOUSE 40S ribosomal protein S23 OS=Mus musculus OX=10090 GN=Rps23 PE=1 SV=3	1	3	3	3	3	3	3	3	3	3	3	3	3	3	3	3	16.1	16.1	16.1	15.807	143	143	4				13	0	31.572	16.1	16.1	16.1	16.1	471950000	154090000	219930000	46614000	51313000	194190000	306520000	299260000	241220000
P62270	P62270	9	9	9	40S ribosomal protein S18	Rps18	sp|P62270|RS18_MOUSE 40S ribosomal protein S18 OS=Mus musculus OX=10090 GN=Rps18 PE=1 SV=3	1	9	9	9	8	8	4	4	8	8	4	4	8	8	4	4	44.1	44.1	44.1	17.718	152	152	4				26	0	56.937	43.4	44.1	25.7	27.6	862740000	230410000	527210000	49313000	55812000	167700000	196000000	115640000	127690000
P62274	P62274	1	1	1	40S ribosomal protein S29	Rps29	sp|P62274|RS29_MOUSE 40S ribosomal protein S29 OS=Mus musculus OX=10090 GN=Rps29 PE=1 SV=2	1	1	1	1	1	1	0	1	1	1	0	1	1	1	0	1	19.6	19.6	19.6	6.6767	56	56	4				4	0.0013825	10.819	19.6	19.6	0	19.6	48682000	32286000	15377000	0	1018000	0	0	0	0
P62281	P62281	7	7	7	40S ribosomal protein S11	Rps11	sp|P62281|RS11_MOUSE 40S ribosomal protein S11 OS=Mus musculus OX=10090 GN=Rps11 PE=1 SV=3	1	7	7	7	0	5	3	4	0	5	3	4	0	5	3	4	31.6	31.6	31.6	18.431	158	158	4				12	0	43.202	0	26.6	12	21.5	223900000	0	133880000	61427000	28593000	0	0	0	0
P62301	P62301	8	8	8	40S ribosomal protein S13	Rps13	sp|P62301|RS13_MOUSE 40S ribosomal protein S13 OS=Mus musculus OX=10090 GN=Rps13 PE=1 SV=2	1	8	8	8	4	7	2	2	4	7	2	2	4	7	2	2	45.7	45.7	45.7	17.222	151	151	3.94			1	15	0	102.17	19.9	41.1	15.2	14.6	858590000	185650000	559100000	49294000	64538000	191760000	266610000	162700000	0
P62305	P62305	1	1	1	Small nuclear ribonucleoprotein E	Snrpe	sp|P62305|RUXE_MOUSE Small nuclear ribonucleoprotein E OS=Mus musculus OX=10090 GN=Snrpe PE=1 SV=1	1	1	1	1	1	1	0	0	1	1	0	0	1	1	0	0	12	12	12	10.803	92	92	4				2	0.0017746	6.9262	12	12	0	0	28870000	13534000	15336000	0	0	0	0	0	0
P62311	P62311	1	1	1	U6 snRNA-associated Sm-like protein LSm3	Lsm3	sp|P62311|LSM3_MOUSE U6 snRNA-associated Sm-like protein LSm3 OS=Mus musculus OX=10090 GN=Lsm3 PE=1 SV=2	1	1	1	1	1	1	0	0	1	1	0	0	1	1	0	0	11.8	11.8	11.8	11.845	102	102	4				2	0.0011567	15.756	11.8	11.8	0	0	38402000	16026000	22376000	0	0	0	0	0	0
P62315	P62315	2	2	2	Small nuclear ribonucleoprotein Sm D1	Snrpd1	sp|P62315|SMD1_MOUSE Small nuclear ribonucleoprotein Sm D1 OS=Mus musculus OX=10090 GN=Snrpd1 PE=1 SV=1	1	2	2	2	1	2	2	2	1	2	2	2	1	2	2	2	20.2	20.2	20.2	13.281	119	119	4				7	0.0012845	18.403	10.9	20.2	20.2	20.2	219430000	37851000	130770000	19022000	31781000	0	150980000	72199000	103220000
P62317	P62317	2	2	2	Small nuclear ribonucleoprotein Sm D2	Snrpd2	sp|P62317|SMD2_MOUSE Small nuclear ribonucleoprotein Sm D2 OS=Mus musculus OX=10090 GN=Snrpd2 PE=1 SV=1	1	2	2	2	1	2	1	1	1	2	1	1	1	2	1	1	16.1	16.1	16.1	13.527	118	118	4				6	0	37.264	7.6	16.1	8.5	7.6	134010000	13734000	76604000	33060000	10618000	0	0	0	0
P62320	P62320	1	1	1	Small nuclear ribonucleoprotein Sm D3	Snrpd3	sp|P62320|SMD3_MOUSE Small nuclear ribonucleoprotein Sm D3 OS=Mus musculus OX=10090 GN=Snrpd3 PE=1 SV=1	1	1	1	1	1	1	1	1	1	1	1	1	1	1	1	1	7.9	7.9	7.9	13.916	126	126	4				4	0.0014006	11.235	7.9	7.9	7.9	7.9	246910000	55716000	125110000	34003000	32090000	0	0	0	0
P62331	P62331	3	3	3	ADP-ribosylation factor 6	Arf6	sp|P62331|ARF6_MOUSE ADP-ribosylation factor 6 OS=Mus musculus OX=10090 GN=Arf6 PE=1 SV=2	1	3	3	3	1	2	0	0	1	2	0	0	1	2	0	0	24.6	24.6	24.6	20.082	175	175	4				3	0.00079428	25.718	6.3	18.3	0	0	222790000	25860000	196930000	0	0	0	0	0	0
P62334	P62334	3	3	3	26S protease regulatory subunit 10B	Psmc6	sp|P62334|PRS10_MOUSE 26S proteasome regulatory subunit 10B OS=Mus musculus OX=10090 GN=Psmc6 PE=1 SV=1	1	3	3	3	0	0	1	2	0	0	1	2	0	0	1	2	9	9	9	44.172	389	389	2		3			0.0012812	18.297	0	0	2.8	6.2	37918000	0	0	22582000	15336000	0	0	0	0
P62482;P63143	P62482	6;1	6;1	6;1	Voltage-gated potassium channel subunit beta-2	Kcnab2	sp|P62482|KCAB2_MOUSE Voltage-gated potassium channel subunit beta-2 OS=Mus musculus OX=10090 GN=Kcnab2 PE=1 SV=1	2	6	6	6	1	2	3	4	1	2	3	4	1	2	3	4	11.2	11.2	11.2	41.021	367	367;401	2.73		5	9	1	0	36.173	2.7	4.9	7.1	9	243510000	56573000	31424000	75685000	79831000	0	59562000	127880000	0
P62484	P62484	7	7	5	Abl interactor 2	Abi2	sp|P62484|ABI2_MOUSE Abl interactor 2 OS=Mus musculus OX=10090 GN=Abi2 PE=1 SV=1	1	7	7	5	1	0	3	7	1	0	3	7	0	0	2	5	17.3	17.3	11.7	49.387	446	446	2	1	10	1		0	43.499	2	0	6.5	17.3	303600000	8327100	0	100280000	194990000	0	0	72100000	84148000
P62627	P62627	3	3	3	Dynein light chain roadblock-type 1	Dynlrb1	sp|P62627|DLRB1_MOUSE Dynein light chain roadblock-type 1 OS=Mus musculus OX=10090 GN=Dynlrb1 PE=1 SV=3	1	3	3	3	2	3	0	0	2	3	0	0	2	3	0	0	38.5	38.5	38.5	10.99	96	96	3.83			1	5	0.0013414	19.324	26	38.5	0	0	193200000	59718000	133490000	0	0	0	0	0	0
P62631	P62631	11	4	4	Elongation factor 1-alpha 2	Eef1a2	sp|P62631|EF1A2_MOUSE Elongation factor 1-alpha 2 OS=Mus musculus OX=10090 GN=Eef1a2 PE=1 SV=1	1	11	4	4	6	8	11	11	1	1	4	4	1	1	4	4	32	16.2	16.2	50.454	463	463	2.41	2	12	5	3	0	78.972	13.4	18.4	32	32	3019800000	121010000	174650000	1341700000	1382500000	307790000	0	505780000	535390000
P62702	P62702	13	13	13	40S ribosomal protein S4, X isoform	Rps4x	sp|P62702|RS4X_MOUSE 40S ribosomal protein S4, X isoform OS=Mus musculus OX=10090 GN=Rps4x PE=1 SV=2	1	13	13	13	7	10	10	6	7	10	10	6	7	10	10	6	42.6	42.6	42.6	29.597	263	263	3.07		2	34	5	0	196.08	27	39.9	30.8	22.8	1503300000	311310000	529970000	494790000	167260000	294080000	304710000	220540000	264390000
P63330;P62715	P63330;P62715	5;5	5;5	5;5	Serine/threonine-protein phosphatase 2A catalytic subunit alpha isoform;Serine/threonine-protein phosphatase 2A catalytic subunit beta isoform	Ppp2ca;Ppp2cb	sp|P63330|PP2AA_MOUSE Serine/threonine-protein phosphatase 2A catalytic subunit alpha isoform OS=Mus musculus OX=10090 GN=Ppp2ca PE=1 SV=1;sp|P62715|PP2AB_MOUSE Serine/threonine-protein phosphatase 2A catalytic subunit beta isoform OS=Mus musculus OX=10090	2	5	5	5	1	3	5	3	1	3	5	3	1	3	5	3	21.7	21.7	21.7	35.608	309	309;309	2.94		3	12	2	0	51.264	3.6	11	21.7	11	1034600000	56700000	297830000	512650000	167380000	0	465740000	472540000	505350000
P62717	P62717	2	2	2	60S ribosomal protein L18a	Rpl18a	sp|P62717|RL18A_MOUSE 60S ribosomal protein L18a OS=Mus musculus OX=10090 GN=Rpl18a PE=1 SV=1	1	2	2	2	1	2	1	1	1	2	1	1	1	2	1	1	10.8	10.8	10.8	20.732	176	176	3.33			4	2	0.0011574	15.86	5.7	10.8	5.7	5.7	157230000	27714000	67569000	48735000	13212000	0	0	0	0
P62737;P63268	P62737;P63268	16;15	1;1	1;1	Actin, aortic smooth muscle;Actin, gamma-enteric smooth muscle	Acta2;Actg2	sp|P62737|ACTA_MOUSE Actin, aortic smooth muscle OS=Mus musculus OX=10090 GN=Acta2 PE=1 SV=1;sp|P63268|ACTH_MOUSE Actin, gamma-enteric smooth muscle OS=Mus musculus OX=10090 GN=Actg2 PE=1 SV=1	2	16	1	1	12	12	13	16	0	0	0	1	0	0	0	1	45.6	2.9	2.9	42.009	377	377;376	2		2			1	-2	31.3	28.6	31.3	45.6	30243000	0	0	0	30243000	0	0	0	0
P62743	P62743	5	5	5	AP-2 complex subunit sigma	Ap2s1	sp|P62743|AP2S1_MOUSE AP-2 complex subunit sigma OS=Mus musculus OX=10090 GN=Ap2s1 PE=1 SV=1	1	5	5	5	4	5	4	4	4	5	4	4	4	5	4	4	35.9	35.9	35.9	17.018	142	142	3.93			2	27	0	323.31	29.6	35.9	29.6	29.6	2425000000	261610000	1416500000	380130000	366800000	446370000	883510000	858280000	910720000
P62746	P62746	3	3	2	Rho-related GTP-binding protein RhoB	Rhob	sp|P62746|RHOB_MOUSE Rho-related GTP-binding protein RhoB OS=Mus musculus OX=10090 GN=Rhob PE=1 SV=1	1	3	3	2	2	2	0	1	2	2	0	1	1	1	0	1	14.8	14.8	6.1	22.123	196	196	3.62			3	5	0	41.986	12.8	14.8	0	4.1	344650000	112670000	211580000	0	20404000	0	0	0	0
P62748	P62748	7	1	1	Hippocalcin-like protein 1	Hpcal1	sp|P62748|HPCL1_MOUSE Hippocalcin-like protein 1 OS=Mus musculus OX=10090 GN=Hpcal1 PE=1 SV=2	1	7	1	1	4	6	3	4	1	1	0	0	1	1	0	0	37.3	5.2	5.2	22.338	193	193	3.33			2	1	0.0093916	6.1757	24.4	33.7	17.1	28.5	29378000	9360200	20018000	0	0	0	0	0	0
P62751	P62751	2	2	2	60S ribosomal protein L23a	Rpl23a	sp|P62751|RL23A_MOUSE 60S ribosomal protein L23a OS=Mus musculus OX=10090 GN=Rpl23a PE=1 SV=1	1	2	2	2	2	2	1	0	2	2	1	0	2	2	1	0	13.5	13.5	13.5	17.695	156	156	3.43			4	3	0.0011179	13.485	13.5	13.5	8.3	0	327340000	113940000	186740000	26658000	0	314930000	176050000	0	0
P62754	P62754	4	4	4	40S ribosomal protein S6	Rps6	sp|P62754|RS6_MOUSE 40S ribosomal protein S6 OS=Mus musculus OX=10090 GN=Rps6 PE=1 SV=1	1	4	4	4	2	3	1	1	2	3	1	1	2	3	1	1	15.7	15.7	15.7	28.68	249	249	3			7		0	33.485	10.8	9.6	4.8	3.2	281850000	79510000	139960000	39728000	22651000	0	0	0	0
P62761	P62761	12	12	9	Visinin-like protein 1	Vsnl1	sp|P62761|VISL1_MOUSE Visinin-like protein 1 OS=Mus musculus OX=10090 GN=Vsnl1 PE=1 SV=2	1	12	12	9	10	12	9	8	10	12	9	8	7	9	7	6	59.7	59.7	48.2	22.142	191	191	3.72			19	48	0	323.31	49.2	59.7	49.7	40.8	7507600000	1301200000	3649000000	1824200000	733250000	1369400000	1766800000	1762500000	2038400000
P62774	P62774	2	2	2	Myotrophin	Mtpn	sp|P62774|MTPN_MOUSE Myotrophin OS=Mus musculus OX=10090 GN=Mtpn PE=1 SV=2	1	2	2	2	1	2	0	0	1	2	0	0	1	2	0	0	25.4	25.4	25.4	12.861	118	118	4				5	0.00079302	25.647	14.4	25.4	0	0	576740000	185860000	390880000	0	0	0	0	0	0
P62806	P62806	11	11	11	Histone H4	Hist1h4a	sp|P62806|H4_MOUSE Histone H4 OS=Mus musculus OX=10090 GN=H4c1 PE=1 SV=2	1	11	11	11	7	11	7	6	7	11	7	6	7	11	7	6	60.2	60.2	60.2	11.367	103	103	3.45	7	4	6	47	0	323.31	49.5	60.2	42.7	42.7	23712000000	8437900000	11114000000	1347900000	2812600000	7347300000	5121000000	2037700000	5497800000
P62812;P26049;P26048;Q8BHJ7	P62812	6;2;2;1	6;2;2;1	6;2;2;1	Gamma-aminobutyric acid receptor subunit alpha-1	Gabra1	sp|P62812|GBRA1_MOUSE Gamma-aminobutyric acid receptor subunit alpha-1 OS=Mus musculus OX=10090 GN=Gabra1 PE=1 SV=1	4	6	6	6	0	0	4	4	0	0	4	4	0	0	4	4	14.7	14.7	14.7	51.753	455	455;492;451;463	2		8			0	36.503	0	0	9.5	8.8	133820000	0	0	65638000	68180000	0	0	28657000	30407000
P62814;Q91YH6	P62814	20;5	20;5	20;5	V-type proton ATPase subunit B, brain isoform	Atp6v1b2	sp|P62814|VATB2_MOUSE V-type proton ATPase subunit B, brain isoform OS=Mus musculus OX=10090 GN=Atp6v1b2 PE=1 SV=1	2	20	20	20	13	14	14	19	13	14	14	19	13	14	14	19	47.2	47.2	47.2	56.55	511	511;513	2.4	7	71	30	13	0	323.31	28.4	34.4	31.1	45.6	9579800000	1523700000	655500000	3649200000	3751300000	768380000	824840000	975990000	836200000
P62821	P62821	6	2	2	Ras-related protein Rab-1A	Rab1A	sp|P62821|RAB1A_MOUSE Ras-related protein Rab-1A OS=Mus musculus OX=10090 GN=Rab1A PE=1 SV=3	1	6	2	2	4	6	6	4	1	2	2	1	1	2	2	1	40.5	18	18	22.677	205	205	3			6		0	88.83	26.3	40.5	40.5	26.3	937490000	130960000	462770000	253130000	90628000	0	701760000	484950000	0
P62823	P62823	7	6	6	Ras-related protein Rab-3C	Rab3c	sp|P62823|RAB3C_MOUSE Ras-related protein Rab-3C OS=Mus musculus OX=10090 GN=Rab3c PE=1 SV=1	1	7	6	6	2	7	5	5	1	6	4	4	1	6	4	4	43.2	39.6	39.6	25.872	227	227	3			20		0	69.291	10.1	43.2	28.6	28.2	1318400000	39887000	626180000	538650000	113710000	0	496370000	579540000	398130000
P62827;Q61820	P62827	9;2	9;2	9;2	GTP-binding nuclear protein Ran	Ran	sp|P62827|RAN_MOUSE GTP-binding nuclear protein Ran OS=Mus musculus OX=10090 GN=Ran PE=1 SV=3	2	9	9	9	5	8	7	7	5	8	7	7	5	8	7	7	38.9	38.9	38.9	24.423	216	216;216	2.88	5	1	29	6	0	110.06	28.2	35.6	38	35.2	3186400000	527780000	1245700000	819530000	593400000	472010000	612050000	489420000	576170000
P62830	P62830	2	2	2	60S ribosomal protein L23	Rpl23	sp|P62830|RL23_MOUSE 60S ribosomal protein L23 OS=Mus musculus OX=10090 GN=Rpl23 PE=1 SV=1	1	2	2	2	0	1	1	0	0	1	1	0	0	1	1	0	17.9	17.9	17.9	14.865	140	140	4				3	0.0011198	13.563	0	10.7	7.1	0	130030000	0	113580000	16446000	0	0	0	0	0
P62835	P62835	6	6	1	Ras-related protein Rap-1A	Rap1a	sp|P62835|RAP1A_MOUSE Ras-related protein Rap-1A OS=Mus musculus OX=10090 GN=Rap1a PE=1 SV=1	1	6	6	1	4	6	3	4	4	6	3	4	0	1	0	0	34.8	34.8	8.2	20.987	184	184	3.36			16	9	0	62.77	18.5	34.8	12	20.1	1326100000	269440000	728500000	153850000	174310000	380270000	719530000	180830000	467180000
P62852	P62852	4	4	4	40S ribosomal protein S25	Rps25	sp|P62852|RS25_MOUSE 40S ribosomal protein S25 OS=Mus musculus OX=10090 GN=Rps25 PE=1 SV=1	1	4	4	4	2	4	3	3	2	4	3	3	2	4	3	3	24	24	24	13.742	125	125	4				12	0	28.964	14.4	24	22.4	22.4	461830000	89033000	272030000	42029000	58736000	221840000	180960000	93393000	155130000
P62855	P62855	2	2	2	40S ribosomal protein S26	Rps26	sp|P62855|RS26_MOUSE 40S ribosomal protein S26 OS=Mus musculus OX=10090 GN=Rps26 PE=1 SV=3	1	2	2	2	2	2	1	1	2	2	1	1	2	2	1	1	20.9	20.9	20.9	13.015	115	115	3.25	2			6	0.001084	12.844	20.9	20.9	13	7.8	387580000	101360000	231210000	25336000	29677000	184450000	233390000	0	0
P62858	P62858	2	2	2	40S ribosomal protein S28	Rps28	sp|P62858|RS28_MOUSE 40S ribosomal protein S28 OS=Mus musculus OX=10090 GN=Rps28 PE=1 SV=1	1	2	2	2	1	2	1	0	1	2	1	0	1	2	1	0	30.4	30.4	30.4	7.8409	69	69	4				4	0.0014215	21.964	17.4	30.4	17.4	0	161470000	64450000	73594000	23422000	0	0	0	0	0
P62862	P62862	2	2	2	40S ribosomal protein S30	Fau	sp|P62862|RS30_MOUSE 40S ribosomal protein S30 OS=Mus musculus OX=10090 GN=Fau PE=1 SV=1	1	2	2	2	1	2	0	0	1	2	0	0	1	2	0	0	18.6	18.6	18.6	6.6478	59	59	4				3	0.0011274	13.798	16.9	18.6	0	0	60752000	28489000	32264000	0	0	0	0	0	0
P62869	P62869	8	8	8	Transcription elongation factor B polypeptide 2	Tceb2	sp|P62869|ELOB_MOUSE Elongin-B OS=Mus musculus OX=10090 GN=Elob PE=1 SV=1	1	8	8	8	3	8	3	3	3	8	3	3	3	8	3	3	55.9	55.9	55.9	13.17	118	118	4				17	0	55.435	24.6	55.9	25.4	22	446980000	62939000	283970000	57671000	42393000	89995000	144900000	119870000	138090000
P62874	P62874	7	7	3	Guanine nucleotide-binding protein G(I)/G(S)/G(T) subunit beta-1	Gnb1	sp|P62874|GBB1_MOUSE Guanine nucleotide-binding protein G(I)/G(S)/G(T) subunit beta-1 OS=Mus musculus OX=10090 GN=Gnb1 PE=1 SV=3	1	7	7	3	6	6	6	7	6	6	6	7	2	2	2	3	19.1	19.1	7.6	37.377	340	340	2.63	12	12	33	11	0	323.31	15.6	15.6	15.6	19.1	18037000000	2579500000	5918700000	6638600000	2899900000	2237200000	5542800000	6812800000	5177300000
P62880	P62880	6	2	0	Guanine nucleotide-binding protein G(I)/G(S)/G(T) subunit beta-2	Gnb2	sp|P62880|GBB2_MOUSE Guanine nucleotide-binding protein G(I)/G(S)/G(T) subunit beta-2 OS=Mus musculus OX=10090 GN=Gnb2 PE=1 SV=3	1	6	2	0	5	6	6	6	1	2	2	2	0	0	0	0	15.6	4.1	0	37.331	340	340	2.92	1	1	8	2	0	33.443	13.5	15.6	15.6	15.6	2042100000	77342000	873840000	759640000	331310000	0	0	0	0
P62881	P62881	4	4	4	Guanine nucleotide-binding protein subunit beta-5	Gnb5	sp|P62881|GNB5_MOUSE Guanine nucleotide-binding protein subunit beta-5 OS=Mus musculus OX=10090 GN=Gnb5 PE=1 SV=1	1	4	4	4	3	1	4	4	3	1	4	4	3	1	4	4	10.9	10.9	10.9	43.565	395	395	2.44	1	11	3	3	0	38.202	8.4	3	10.9	10.9	479460000	66444000	10603000	192980000	209440000	102040000	0	78311000	83335000
P62889	P62889	3	3	3	60S ribosomal protein L30	Rpl30	sp|P62889|RL30_MOUSE 60S ribosomal protein L30 OS=Mus musculus OX=10090 GN=Rpl30 PE=1 SV=2	1	3	3	3	1	3	1	0	1	3	1	0	1	3	1	0	17.4	17.4	17.4	12.784	115	115	4				6	0.001368	19.888	10.4	17.4	7	0	112570000	14688000	80882000	17004000	0	0	0	0	0
P62897;CON__P62894;P00015	P62897	8;3;2	8;3;2	8;3;2	Cytochrome c, somatic	Cycs	sp|P62897|CYC_MOUSE Cytochrome c, somatic OS=Mus musculus OX=10090 GN=Cycs PE=1 SV=2	3	8	8	8	7	8	6	6	7	8	6	6	7	8	6	6	57.1	57.1	57.1	11.605	105	105;105;105	3.23	6	8	7	32	0	122.07	56.2	57.1	40	55.2	5460300000	1496800000	2407800000	861460000	694260000	2334000000	1547300000	1003200000	1314300000
P62900	P62900	3	3	3	60S ribosomal protein L31	Rpl31	sp|P62900|RL31_MOUSE 60S ribosomal protein L31 OS=Mus musculus OX=10090 GN=Rpl31 PE=1 SV=1	1	3	3	3	2	2	2	3	2	2	2	3	2	2	2	3	26.4	26.4	26.4	14.463	125	125	4				10	0	103.77	18.4	18.4	18.4	26.4	450720000	110020000	224080000	47170000	69439000	205440000	224960000	150670000	216010000
P62908	P62908	9	9	9	40S ribosomal protein S3	Rps3	sp|P62908|RS3_MOUSE 40S ribosomal protein S3 OS=Mus musculus OX=10090 GN=Rps3 PE=1 SV=1	1	9	9	9	5	8	7	7	5	8	7	7	5	8	7	7	34.2	34.2	34.2	26.674	243	243	3.12			28	4	0	80.304	19.3	30.9	30	25.5	1606400000	269410000	625410000	436760000	274850000	267580000	362880000	309820000	327040000
P62918	P62918	5	5	5	60S ribosomal protein L8	Rpl8	sp|P62918|RL8_MOUSE 60S ribosomal protein L8 OS=Mus musculus OX=10090 GN=Rpl8 PE=1 SV=2	1	5	5	5	2	4	2	1	2	4	2	1	2	4	2	1	16.7	16.7	16.7	28.024	257	257	2.62	3	2	9	2	0	80.779	10.9	13.6	7.4	4.3	391020000	69719000	231370000	67926000	22002000	215990000	198840000	0	0
P62962;CON__P02584	P62962;CON__P02584	7;4	7;4	7;4	Profilin-1	Pfn1	sp|P62962|PROF1_MOUSE Profilin-1 OS=Mus musculus OX=10090 GN=Pfn1 PE=1 SV=2;	2	7	7	7	5	7	5	5	5	7	5	5	5	7	5	5	59.3	59.3	59.3	14.957	140	140;140	4				30	0	134.09	45.7	59.3	45.7	45.7	2407500000	625290000	1253000000	249010000	280140000	794800000	738550000	442080000	677160000
P62996	P62996	2	2	2	Transformer-2 protein homolog beta	Tra2b	sp|P62996|TRA2B_MOUSE Transformer-2 protein homolog beta OS=Mus musculus OX=10090 GN=Tra2b PE=1 SV=1	1	2	2	2	0	1	1	0	0	1	1	0	0	1	1	0	6.6	6.6	6.6	33.665	288	288	3			2		0.0010724	12.572	0	3.1	3.5	0	26308000	0	4665500	21642000	0	0	0	0	0
P63001;Q05144	P63001;Q05144	7;5	7;5	3;1	Ras-related C3 botulinum toxin substrate 1;Ras-related C3 botulinum toxin substrate 2	Rac1;Rac2	sp|P63001|RAC1_MOUSE Ras-related C3 botulinum toxin substrate 1 OS=Mus musculus OX=10090 GN=Rac1 PE=1 SV=1;sp|Q05144|RAC2_MOUSE Ras-related C3 botulinum toxin substrate 2 OS=Mus musculus OX=10090 GN=Rac2 PE=1 SV=1	2	7	7	3	5	7	2	5	5	7	2	5	3	3	1	3	38	38	14.1	21.45	192	192;192	3.33	2	1	21	19	0	323.31	27.1	38	10.4	27.1	4296600000	1066700000	1909700000	753770000	566490000	1113500000	1246200000	1603600000	1166600000
P63005	P63005	5	5	5	Platelet-activating factor acetylhydrolase IB subunit alpha	Pafah1b1	sp|P63005|LIS1_MOUSE Platelet-activating factor acetylhydrolase IB subunit beta OS=Mus musculus OX=10090 GN=Pafah1b1 PE=1 SV=2	1	5	5	5	0	0	4	5	0	0	4	5	0	0	4	5	16.1	16.1	16.1	46.67	410	410	2		10			0	37.174	0	0	12.4	16.1	312160000	0	0	141420000	170730000	0	0	79401000	85065000
P63011	P63011	7	7	5	Ras-related protein Rab-3A	Rab3a	sp|P63011|RAB3A_MOUSE Ras-related protein Rab-3A OS=Mus musculus OX=10090 GN=Rab3a PE=1 SV=1	1	7	7	5	5	7	6	5	5	7	6	5	3	5	4	3	42.7	42.7	30.5	24.97	220	220	2.89	7	1	38	9	0	225.61	33.6	42.7	39.1	31.8	13093000000	1173800000	6226900000	4007900000	1684200000	1443600000	2680400000	2096100000	1829700000
P63017	P63017	30	30	22	Heat shock cognate 71 kDa protein	Hspa8	sp|P63017|HSP7C_MOUSE Heat shock cognate 71 kDa protein OS=Mus musculus OX=10090 GN=Hspa8 PE=1 SV=1	1	30	30	22	19	25	26	27	19	25	26	27	11	17	18	19	47.5	47.5	35.4	70.87	646	646	2.14	60	133	64	17	0	323.31	31.9	41.3	42.1	43.2	41602000000	5444300000	5770300000	14415000000	15972000000	1931000000	1642200000	1719600000	1919100000
P63028	P63028	2	2	2	Translationally-controlled tumor protein	Tpt1	sp|P63028|TCTP_MOUSE Translationally-controlled tumor protein OS=Mus musculus OX=10090 GN=Tpt1 PE=1 SV=1	1	2	2	2	1	2	2	1	1	2	2	1	1	2	2	1	15.7	15.7	15.7	19.462	172	172	3			7		0	31.158	8.1	15.7	15.7	8.1	975040000	253120000	361790000	224150000	135990000	0	0	0	0
P63030	P63030	2	2	2	Mitochondrial pyruvate carrier 1	Mpc1	sp|P63030|MPC1_MOUSE Mitochondrial pyruvate carrier 1 OS=Mus musculus OX=10090 GN=Mpc1 PE=1 SV=1	1	2	2	2	1	2	2	2	1	2	2	2	1	2	2	2	14.7	14.7	14.7	12.454	109	109	4				8	0.0010576	12.408	7.3	14.7	14.7	14.7	248520000	11680000	118790000	94962000	23095000	0	88844000	287050000	82934000
P63037	P63037	4	4	4	DnaJ homolog subfamily A member 1	Dnaja1	sp|P63037|DNJA1_MOUSE DnaJ homolog subfamily A member 1 OS=Mus musculus OX=10090 GN=Dnaja1 PE=1 SV=1	1	4	4	4	0	0	3	2	0	0	3	2	0	0	3	2	12.8	12.8	12.8	44.868	397	397	2		6			0.0007764	25.003	0	0	9.6	6.5	120690000	0	0	70029000	50661000	0	0	0	0
P63038	P63038	21	21	21	60 kDa heat shock protein, mitochondrial	Hspd1	sp|P63038|CH60_MOUSE 60 kDa heat shock protein, mitochondrial OS=Mus musculus OX=10090 GN=Hspd1 PE=1 SV=1	1	21	21	21	11	8	17	17	11	8	17	17	11	8	17	17	41.7	41.7	41.7	60.955	573	573	2.23	5	57	20	2	0	322.53	20.2	16.4	30.4	37	6114000000	610580000	254320000	2446800000	2802300000	371790000	363100000	492280000	450370000
P63040	P63040	4	2	2	Complexin-1	Cplx1	sp|P63040|CPLX1_MOUSE Complexin-1 OS=Mus musculus OX=10090 GN=Cplx1 PE=1 SV=1	1	4	2	2	3	2	1	0	2	0	0	0	2	0	0	0	34.3	25.4	25.4	15.122	134	134	4				2	0.0011117	13.35	33.6	9	8.2	0	166800000	166800000	0	0	0	0	0	0	0
P63044;P63024	P63044;P63024	6;3	6;3	5;2	Vesicle-associated membrane protein 2;Vesicle-associated membrane protein 3	Vamp2;Vamp3	sp|P63044|VAMP2_MOUSE Vesicle-associated membrane protein 2 OS=Mus musculus OX=10090 GN=Vamp2 PE=1 SV=2;sp|P63024|VAMP3_MOUSE Vesicle-associated membrane protein 3 OS=Mus musculus OX=10090 GN=Vamp3 PE=1 SV=1	2	6	6	5	2	6	5	3	2	6	5	3	2	5	4	3	60.3	60.3	60.3	12.691	116	116;103	3.97			1	28	0	323.31	28.4	60.3	35.3	34.5	18559000000	3857900000	10257000000	2136500000	2307200000	5683900000	4908700000	3417000000	4061400000
P63046	P63046	6	6	6	Sulfotransferase 4A1	Sult4a1	sp|P63046|ST4A1_MOUSE Sulfotransferase 4A1 OS=Mus musculus OX=10090 GN=Sult4a1 PE=1 SV=1	1	6	6	6	2	6	3	1	2	6	3	1	2	6	3	1	21.5	21.5	21.5	33.053	284	284	3			12		0	43.986	6.7	21.5	10.6	3.9	242840000	49700000	128850000	49196000	15095000	120380000	87000000	61226000	0
P63054	P63054	1	1	1	Purkinje cell protein 4	Pcp4	sp|P63054|PCP4_MOUSE Calmodulin regulator protein PCP4 OS=Mus musculus OX=10090 GN=Pcp4 PE=3 SV=2	1	1	1	1	1	1	0	0	1	1	0	0	1	1	0	0	16.1	16.1	16.1	6.8073	62	62	4				2	0.001368	8.3605	16.1	16.1	0	0	60294000	32414000	27881000	0	0	0	0	0	0
P63073	P63073	1	1	1	Eukaryotic translation initiation factor 4E	Eif4e	sp|P63073|IF4E_MOUSE Eukaryotic translation initiation factor 4E OS=Mus musculus OX=10090 GN=Eif4e PE=1 SV=1	1	1	1	1	0	1	0	1	0	1	0	1	0	1	0	1	6.5	6.5	6.5	25.053	217	217	3			2		0.0013711	8.5813	0	6.5	0	6.5	114110000	0	85314000	0	28801000	0	0	0	0
P63082	P63082	1	1	1	V-type proton ATPase 16 kDa proteolipid subunit	Atp6v0c	sp|P63082|VATL_MOUSE V-type proton ATPase 16 kDa proteolipid subunit OS=Mus musculus OX=10090 GN=Atp6v0c PE=1 SV=1	1	1	1	1	1	1	1	1	1	1	1	1	1	1	1	1	11.6	11.6	11.6	15.808	155	155	4				9	0	33.318	11.6	11.6	11.6	11.6	1886700000	124060000	1320200000	214590000	227810000	0	0	0	0
P63085	P63085	13	13	10	Mitogen-activated protein kinase 1	Mapk1	sp|P63085|MK01_MOUSE Mitogen-activated protein kinase 1 OS=Mus musculus OX=10090 GN=Mapk1 PE=1 SV=3	1	13	13	10	6	6	12	11	6	6	12	11	6	6	10	8	34.9	34.9	25.4	41.275	358	358	2.69		30	33	8	0	241.81	20.7	20.7	30.7	30.2	1977600000	196620000	140950000	975020000	665030000	221520000	92442000	219700000	227420000
P63094;Q6R0H7	P63094;Q6R0H7	7;7	6;6	6;6	Guanine nucleotide-binding protein G(s) subunit alpha isoforms short;Guanine nucleotide-binding protein G(s) subunit alpha isoforms XLas	Gnas	sp|P63094|GNAS2_MOUSE Guanine nucleotide-binding protein G(s) subunit alpha isoforms short OS=Mus musculus OX=10090 GN=Gnas PE=1 SV=1;sp|Q6R0H7|GNAS1_MOUSE Guanine nucleotide-binding protein G(s) subunit alpha isoforms XLas OS=Mus musculus OX=10090 GN=Gnas	2	7	6	6	2	2	3	6	1	1	2	5	1	1	2	5	18.8	16	16	45.663	394	394;1133	2.11		8	1		0	42.825	5.8	5.1	8.6	15.7	247740000	6706200	4802000	68833000	167390000	0	0	0	0
P63101	P63101	16	14	12	14-3-3 protein zeta/delta	Ywhaz	sp|P63101|1433Z_MOUSE 14-3-3 protein zeta/delta OS=Mus musculus OX=10090 GN=Ywhaz PE=1 SV=1	1	16	14	12	15	15	15	14	13	13	13	12	12	12	12	11	65.7	61.6	52.2	27.771	245	245	2.99	6	7	90	18	0	323.31	62	63.3	62	57.1	94274000000	17253000000	30505000000	34007000000	12510000000	12708000000	15284000000	15448000000	12154000000
P63158;P30681	P63158	5;1	5;1	5;1	High mobility group protein B1	Hmgb1	sp|P63158|HMGB1_MOUSE High mobility group protein B1 OS=Mus musculus OX=10090 GN=Hmgb1 PE=1 SV=2	2	5	5	5	2	4	4	5	2	4	4	5	2	4	4	5	17.7	17.7	17.7	24.893	215	215;210	3			19		0	40.114	7	13.5	17.2	17.7	656790000	54501000	222060000	228710000	151510000	259320000	267480000	137170000	244130000
P63168	P63168	3	1	1	Dynein light chain 1, cytoplasmic	Dynll1	sp|P63168|DYL1_MOUSE Dynein light chain 1, cytoplasmic OS=Mus musculus OX=10090 GN=Dynll1 PE=1 SV=1	1	3	1	1	2	3	1	1	0	1	0	0	0	1	0	0	38.2	13.5	13.5	10.366	89	89	4				1	0.0017606	6.7447	24.7	38.2	12.4	12.4	29392000	0	29392000	0	0	0	0	0	0
P63213	P63213	2	2	2	Guanine nucleotide-binding protein G(I)/G(S)/G(O) subunit gamma-2	Gng2	sp|P63213|GBG2_MOUSE Guanine nucleotide-binding protein G(I)/G(S)/G(O) subunit gamma-2 OS=Mus musculus OX=10090 GN=Gng2 PE=1 SV=2	1	2	2	2	2	2	1	2	2	2	1	2	2	2	1	2	39.4	39.4	39.4	7.8501	71	71	4				9	0	41.087	39.4	39.4	16.9	39.4	674890000	338510000	227480000	29482000	79419000	875610000	190180000	0	0
P63216	P63216	1	1	1	Guanine nucleotide-binding protein G(I)/G(S)/G(O) subunit gamma-3	Gng3	sp|P63216|GBG3_MOUSE Guanine nucleotide-binding protein G(I)/G(S)/G(O) subunit gamma-3 OS=Mus musculus OX=10090 GN=Gng3 PE=1 SV=1	1	1	1	1	1	0	1	0	1	0	1	0	1	0	1	0	22.7	22.7	22.7	8.3047	75	75	4				2	0.00096993	11.567	22.7	0	22.7	0	120870000	47858000	0	73009000	0	0	0	0	0
P63242;Q8BGY2	P63242	5;1	5;1	5;1	Eukaryotic translation initiation factor 5A-1	Eif5a	sp|P63242|IF5A1_MOUSE Eukaryotic translation initiation factor 5A-1 OS=Mus musculus OX=10090 GN=Eif5a PE=1 SV=2	2	5	5	5	3	3	2	1	3	3	2	1	3	3	2	1	33.8	33.8	33.8	16.832	154	154;153	3.82			2	9	0	60.368	30.5	33.8	13	7.8	441530000	125860000	249060000	39449000	27155000	0	0	0	0
P63276	P63276	1	1	1	40S ribosomal protein S17	Rps17	sp|P63276|RS17_MOUSE 40S ribosomal protein S17 OS=Mus musculus OX=10090 GN=Rps17 PE=1 SV=2	1	1	1	1	0	1	1	1	0	1	1	1	0	1	1	1	7.4	7.4	7.4	15.524	135	135	4				3	0.0021834	6.6825	0	7.4	7.4	7.4	88376000	0	31141000	45387000	11847000	0	0	0	0
P63280	P63280	3	3	3	SUMO-conjugating enzyme UBC9	Ube2i	sp|P63280|UBC9_MOUSE SUMO-conjugating enzyme UBC9 OS=Mus musculus OX=10090 GN=Ube2i PE=1 SV=1	1	3	3	3	1	3	0	1	1	3	0	1	1	3	0	1	16.5	16.5	16.5	18.007	158	158	4				5	0.0013333	19.163	7.6	16.5	0	7.6	57153000	8144600	44956000	0	4052400	0	0	0	0
P63318	P63318	18	18	17	Protein kinase C gamma type	Prkcg	sp|P63318|KPCG_MOUSE Protein kinase C gamma type OS=Mus musculus OX=10090 GN=Prkcg PE=1 SV=1	1	18	18	17	3	12	9	12	3	12	9	12	3	12	9	11	25.3	25.3	23	78.357	697	697	1.7	21	20	5	1	0	122.47	5.5	16.4	12.9	17.9	1523400000	162830000	589640000	334780000	436110000	222910000	175820000	174660000	169010000
P63321	P63321	7	7	3	Ras-related protein Ral-A	Rala	sp|P63321|RALA_MOUSE Ras-related protein Ral-A OS=Mus musculus OX=10090 GN=Rala PE=1 SV=1	1	7	7	3	3	7	4	3	3	7	4	3	2	3	2	1	38.3	38.3	15	23.553	206	206	3.05			19	1	0	53.364	19.4	38.3	22.8	16	1303300000	234650000	578270000	337600000	152760000	449840000	652850000	481860000	473030000
P63323	P63323	2	2	2	40S ribosomal protein S12	Rps12	sp|P63323|RS12_MOUSE 40S ribosomal protein S12 OS=Mus musculus OX=10090 GN=Rps12 PE=1 SV=2	1	2	2	2	1	2	1	1	1	2	1	1	1	2	1	1	13.6	13.6	13.6	14.525	132	132	4				6	0.0010173	11.975	7.6	13.6	7.6	7.6	203270000	26228000	147580000	14755000	14704000	0	0	0	0
P63325	P63325	3	3	3	40S ribosomal protein S10	Rps10	sp|P63325|RS10_MOUSE 40S ribosomal protein S10 OS=Mus musculus OX=10090 GN=Rps10 PE=1 SV=1	1	3	3	3	2	3	1	1	2	3	1	1	2	3	1	1	18.2	18.2	18.2	18.916	165	165	3.71			2	5	0.00072464	23.162	18.2	18.2	9.1	9.1	292940000	44578000	230070000	7314200	10976000	126980000	202460000	0	0
P63328;P48455	P63328	15;3	15;3	8;0	Serine/threonine-protein phosphatase 2B catalytic subunit alpha isoform	Ppp3ca	sp|P63328|PP2BA_MOUSE Serine/threonine-protein phosphatase 2B catalytic subunit alpha isoform OS=Mus musculus OX=10090 GN=Ppp3ca PE=1 SV=1	2	15	15	8	9	12	13	13	9	12	13	13	4	7	6	6	32.4	32.4	16.9	58.643	521	521;513	2.4	14	43	32	11	0	156.66	18	23.8	29.9	29.9	11674000000	2013500000	1758000000	3630600000	4271600000	950780000	876780000	771950000	923650000
P67778	P67778	14	14	14	Prohibitin	Phb	sp|P67778|PHB_MOUSE Prohibitin OS=Mus musculus OX=10090 GN=Phb PE=1 SV=1	1	14	14	14	11	12	11	9	11	12	11	9	11	12	11	9	60.3	60.3	60.3	29.82	272	272	3.04	1		46	4	0	205.56	47.4	46.7	45.2	41.2	4581700000	1018600000	1893900000	1058000000	611180000	573370000	654740000	526490000	591880000
P67871	P67871	3	3	3	Casein kinase II subunit beta	Csnk2b	sp|P67871|CSK2B_MOUSE Casein kinase II subunit beta OS=Mus musculus OX=10090 GN=Csnk2b PE=1 SV=1	1	3	3	3	1	2	2	3	1	2	2	3	1	2	2	3	14.4	14.4	14.4	24.942	215	215	3.1			9	1	0.0014194	21.883	4.2	7.9	10.2	14.4	214050000	75237000	50231000	48751000	39832000	0	95679000	0	77572000
P67984	P67984	3	3	3	60S ribosomal protein L22	Rpl22	sp|P67984|RL22_MOUSE 60S ribosomal protein L22 OS=Mus musculus OX=10090 GN=Rpl22 PE=1 SV=2	1	3	3	3	2	3	2	2	2	3	2	2	2	3	2	2	19.5	19.5	19.5	14.759	128	128	4				10	0	40.82	18.8	19.5	18.8	18.8	927460000	243110000	463080000	99283000	121990000	0	0	0	0
P68134;P68033	P68134;P68033	16;16	4;4	0;0	Actin, alpha skeletal muscle;Actin, alpha cardiac muscle 1	Acta1;Actc1	sp|P68134|ACTS_MOUSE Actin, alpha skeletal muscle OS=Mus musculus OX=10090 GN=Acta1 PE=1 SV=1;sp|P68033|ACTC_MOUSE Actin, alpha cardiac muscle 1 OS=Mus musculus OX=10090 GN=Actc1 PE=1 SV=1	2	16	4	0	13	13	14	16	2	1	2	4	0	0	0	0	45.6	18.3	0	42.051	377	377;377	2.41	1	10	4	2	0	38.322	34.2	31.6	34.2	45.6	14626000000	3903800000	1645000000	2667200000	6410400000	6458800000	6636800000	4426800000	9872800000
P68037	P68037	4	4	4	Ubiquitin-conjugating enzyme E2 L3	Ube2l3	sp|P68037|UB2L3_MOUSE Ubiquitin-conjugating enzyme E2 L3 OS=Mus musculus OX=10090 GN=Ube2l3 PE=1 SV=1	1	4	4	4	1	4	2	1	1	4	2	1	1	4	2	1	22.7	22.7	22.7	17.861	154	154	4				8	0.00082305	27.296	5.8	22.7	7.1	5.8	214510000	5503000	175530000	27503000	5972000	0	88163000	143550000	0
P68040	P68040	8	8	8	Guanine nucleotide-binding protein subunit beta-2-like 1;Guanine nucleotide-binding protein subunit beta-2-like 1, N-terminally processed	Gnb2l1	sp|P68040|RACK1_MOUSE Receptor of activated protein C kinase 1 OS=Mus musculus OX=10090 GN=Rack1 PE=1 SV=3	1	8	8	8	3	8	5	4	3	8	5	4	3	8	5	4	25.6	25.6	25.6	35.076	317	317	3.08			23	2	0	63.204	12.3	25.6	18.3	15.5	1387700000	200900000	614040000	351050000	221750000	291260000	446240000	286690000	377290000
P68181	P68181	7	7	2	cAMP-dependent protein kinase catalytic subunit beta	Prkacb	sp|P68181|KAPCB_MOUSE cAMP-dependent protein kinase catalytic subunit beta OS=Mus musculus OX=10090 GN=Prkacb PE=1 SV=2	1	7	7	2	3	2	4	6	3	2	4	6	1	1	1	2	21.9	21.9	10.3	40.707	351	351	2.3		15	4	1	0	46.231	8.5	6	11.1	19.4	825660000	49488000	18745000	377580000	379850000	88923000	139340000	164600000	143020000
P68254	P68254	9	6	6	14-3-3 protein theta	Ywhaq	sp|P68254|1433T_MOUSE 14-3-3 protein theta OS=Mus musculus OX=10090 GN=Ywhaq PE=1 SV=1	1	9	6	6	7	8	6	7	5	5	4	5	5	5	4	5	37.6	26.5	26.5	27.778	245	245	3.16			26	5	0	184.99	33.5	37.6	33.9	33.9	6341800000	1368500000	2333800000	1666500000	972970000	2392600000	2125800000	1498500000	1942600000
P68368	P68368	22	4	4	Tubulin alpha-4A chain	Tuba4a	sp|P68368|TBA4A_MOUSE Tubulin alpha-4A chain OS=Mus musculus OX=10090 GN=Tuba4a PE=1 SV=1	1	22	4	4	19	19	19	21	3	3	3	4	3	3	3	4	58	12.1	12.1	49.924	448	448	2.4	11	17	13	9	0	169.58	44.4	48	48	57.8	24031000000	4355100000	3186500000	7299600000	9190200000	3887700000	5090300000	3275600000	4526900000
P68369;P05214	P68369;P05214	26;21	26;21	1;1	Tubulin alpha-1A chain;Tubulin alpha-3 chain	Tuba1a;Tuba3a	sp|P68369|TBA1A_MOUSE Tubulin alpha-1A chain OS=Mus musculus OX=10090 GN=Tuba1a PE=1 SV=1;sp|P05214|TBA3_MOUSE Tubulin alpha-3 chain OS=Mus musculus OX=10090 GN=Tuba3a PE=1 SV=1	2	26	26	1	19	19	20	25	19	19	20	25	1	1	1	1	61.2	61.2	3.1	50.135	451	451;450	2.4	46	161	84	48	0	323.31	45.7	49.2	50.6	61	235530000000	38467000000	27802000000	78372000000	90890000000	14385000000	17111000000	16377000000	16939000000
P68372;A2AQ07;CON__ENSEMBL:ENSBTAP00000025008	P68372	26;5;5	26;5;5	1;0;0	Tubulin beta-4B chain	Tubb4b	sp|P68372|TBB4B_MOUSE Tubulin beta-4B chain OS=Mus musculus OX=10090 GN=Tubb4b PE=1 SV=1	3	26	26	1	19	22	22	24	19	22	22	24	1	1	1	1	60.9	60.9	2.7	49.83	445	445;451;536	2.38	69	237	130	64	0	323.31	49.9	56	55.1	60	200580000000	28852000000	20345000000	61108000000	90276000000	11373000000	12173000000	7394600000	12215000000
P68404	P68404	13	13	12	Protein kinase C beta type	Prkcb	sp|P68404|KPCB_MOUSE Protein kinase C beta type OS=Mus musculus OX=10090 GN=Prkcb PE=1 SV=4	1	13	13	12	2	11	6	10	2	11	6	10	2	10	5	9	17.9	17.9	16.1	76.75	671	671	1.71	22	16	5	2	0	86.783	2.5	15.9	8.3	14.9	984690000	29721000	479210000	133020000	342750000	20821000	106540000	52675000	97514000
P68510	P68510	14	11	11	14-3-3 protein eta	Ywhah	sp|P68510|1433F_MOUSE 14-3-3 protein eta OS=Mus musculus OX=10090 GN=Ywhah PE=1 SV=2	1	14	11	11	11	13	12	11	8	11	9	8	8	11	9	8	50.4	43.9	43.9	28.211	246	246	2.98		2	49	1	0	323.31	35	48	39	35	10115000000	2219900000	4056600000	2420100000	1418200000	2432800000	2923600000	2433000000	1980600000
P70122	P70122	3	3	3	Ribosome maturation protein SBDS	Sbds	sp|P70122|SBDS_MOUSE Ribosome maturation protein SBDS OS=Mus musculus OX=10090 GN=Sbds PE=1 SV=4	1	3	3	3	1	2	1	1	1	2	1	1	1	2	1	1	10.8	10.8	10.8	28.78	250	250	3			5		0.0012492	17.927	4	6.8	3.6	4	30714000	5613500	16857000	5916600	2326700	0	0	0	0
P70168	P70168	16	16	16	Importin subunit beta-1	Kpnb1	sp|P70168|IMB1_MOUSE Importin subunit beta-1 OS=Mus musculus OX=10090 GN=Kpnb1 PE=1 SV=2	1	16	16	16	3	14	5	12	3	14	5	12	3	14	5	12	22.7	22.7	22.7	97.183	876	876	1.18	33	3	2		0	168.26	4.1	19.6	7.6	16.3	1093600000	31614000	517810000	171980000	372180000	75535000	116310000	116530000	92902000
P70175	P70175	12	11	11	Disks large homolog 3	Dlg3	sp|P70175|DLG3_MOUSE Disks large homolog 3 OS=Mus musculus OX=10090 GN=Dlg3 PE=1 SV=1	1	12	11	11	2	11	1	6	1	10	1	5	1	10	1	5	17	15.9	15.9	93.481	849	849	1.26	16	1	2		0	78.182	2.6	15.9	1.5	9.9	471360000	14892000	316280000	28389000	111800000	0	48673000	0	54759000
P70188	P70188	3	3	3	Kinesin-associated protein 3	Kifap3	sp|P70188|KIFA3_MOUSE Kinesin-associated protein 3 OS=Mus musculus OX=10090 GN=Kifap3 PE=1 SV=1	1	3	3	3	0	2	1	3	0	2	1	3	0	2	1	3	4.2	4.2	4.2	91.29	793	793	1.17	5	1			0.0012315	17.737	0	2.6	1.3	4.2	35093000	0	16335000	2232000	16526000	0	8850100	0	9669500
P70195	P70195	4	4	4	Proteasome subunit beta type-7	Psmb7	sp|P70195|PSB7_MOUSE Proteasome subunit beta type-7 OS=Mus musculus OX=10090 GN=Psmb7 PE=1 SV=1	1	4	4	4	1	3	3	1	1	3	3	1	1	3	3	1	14.4	14.4	14.4	29.891	277	277	3.11			8	1	0.00080841	26.343	3.6	10.8	11.2	3.6	184510000	21911000	75506000	63065000	24023000	0	101030000	105050000	0
P70202	P70202	3	3	3	Latexin	Lxn	sp|P70202|LXN_MOUSE Latexin OS=Mus musculus OX=10090 GN=Lxn PE=1 SV=2	1	3	3	3	0	3	2	1	0	3	2	1	0	3	2	1	14.4	14.4	14.4	25.492	222	222	2.67	1		5		0	27.986	0	14.4	9.5	5.4	362810000	0	184280000	131640000	46894000	0	221310000	196250000	0
P70206;P70208	P70206	8;3	6;1	6;1	Plexin-A1	Plxna1	sp|P70206|PLXA1_MOUSE Plexin-A1 OS=Mus musculus OX=10090 GN=Plxna1 PE=1 SV=1	2	8	6	6	1	5	0	5	0	3	0	4	0	3	0	4	4.3	3.2	3.2	211.1	1894	1894;1872	1.12	7	1			0	35.772	0.5	2.8	0	2.5	56970000	0	26156000	0	30814000	0	0	0	0
P70207	P70207	6	2	2	Plexin-A2	Plxna2	sp|P70207|PLXA2_MOUSE Plexin-A2 OS=Mus musculus OX=10090 GN=Plxna2 PE=1 SV=2	1	6	2	2	1	5	0	2	0	1	0	1	0	1	0	1	3.3	1.1	1.1	211.53	1894	1894	1	2				0.0014409	11.502	0.5	2.7	0	1.1	10067000	0	7398400	0	2668700	0	0	0	0
P70227	P70227	1	1	1	Inositol 1,4,5-trisphosphate receptor type 3	Itpr3	sp|P70227|ITPR3_MOUSE Inositol 1,4,5-trisphosphate receptor type 3 OS=Mus musculus OX=10090 GN=Itpr3 PE=1 SV=3	1	1	1	1	0	1	0	0	0	1	0	0	0	1	0	0	0.3	0.3	0.3	304.27	2670	2670	1	1				0.003003	6.4548	0	0.3	0	0	7411200	0	7411200	0	0	0	0	0	0
P70232	P70232	3	3	3	Neural cell adhesion molecule L1-like protein;Processed neural cell adhesion molecule L1-like protein	Chl1	sp|P70232|NCHL1_MOUSE Neural cell adhesion molecule L1-like protein OS=Mus musculus OX=10090 GN=Chl1 PE=1 SV=2	1	3	3	3	0	3	1	1	0	3	1	1	0	3	1	1	2.3	2.3	2.3	135.07	1209	1209	1	5				0.0012188	17.65	0	2.3	0.7	0.7	26589000	0	15184000	5394600	6010500	0	0	0	0
P70280	P70280	2	2	2	Vesicle-associated membrane protein 7	Vamp7	sp|P70280|VAMP7_MOUSE Vesicle-associated membrane protein 7 OS=Mus musculus OX=10090 GN=Vamp7 PE=1 SV=1	1	2	2	2	1	2	0	0	1	2	0	0	1	2	0	0	7.7	7.7	7.7	24.967	220	220	3			3		0.0010188	11.999	4.1	7.7	0	0	19765000	7155200	12610000	0	0	0	0	0	0
P70290	P70290	2	2	2	55 kDa erythrocyte membrane protein	Mpp1	sp|P70290|EM55_MOUSE 55 kDa erythrocyte membrane protein OS=Mus musculus OX=10090 GN=Mpp1 PE=1 SV=1	1	2	2	2	0	0	1	2	0	0	1	2	0	0	1	2	5.2	5.2	5.2	52.227	466	466	2		3			0.0010917	12.992	0	0	2.6	5.2	27101000	0	0	5872400	21228000	0	0	0	0
P70296	P70296	9	9	9	Phosphatidylethanolamine-binding protein 1;Hippocampal cholinergic neurostimulating peptide	Pebp1	sp|P70296|PEBP1_MOUSE Phosphatidylethanolamine-binding protein 1 OS=Mus musculus OX=10090 GN=Pebp1 PE=1 SV=3	1	9	9	9	8	8	9	6	8	8	9	6	8	8	9	6	49.2	49.2	49.2	20.83	187	187	3.37			34	20	0	285.98	45.5	45.5	49.2	45.5	10948000000	2780000000	4744300000	2063500000	1360000000	1952500000	3238800000	1368200000	1624100000
P70318;P52912	P70318;P52912	2;1	2;1	2;1	Nucleolysin TIAR;Nucleolysin TIA-1	Tial1;Tia1	sp|P70318|TIAR_MOUSE Nucleolysin TIAR OS=Mus musculus OX=10090 GN=Tial1 PE=1 SV=1;sp|P52912|TIA1_MOUSE Nucleolysin TIA-1 OS=Mus musculus OX=10090 GN=Tia1 PE=1 SV=1	2	2	2	2	0	0	1	1	0	0	1	1	0	0	1	1	5.1	5.1	5.1	43.388	392	392;386	2		2			0.0014012	11.252	0	0	2.3	2.8	12923000	0	0	6035000	6887900	0	0	0	0
P70336;P70335	P70336	18;2	18;2	18;2	Rho-associated protein kinase 2	Rock2	sp|P70336|ROCK2_MOUSE Rho-associated protein kinase 2 OS=Mus musculus OX=10090 GN=Rock2 PE=1 SV=1	2	18	18	18	2	14	2	12	2	14	2	12	2	14	2	12	13.7	13.7	13.7	160.58	1388	1388;1354	1.2	26	2	2		0	113.56	1.3	11	1.7	8.6	376280000	16972000	248170000	7878100	103270000	14498000	51582000	4766200	34116000
P70349	P70349	4	4	4	Histidine triad nucleotide-binding protein 1	Hint1	sp|P70349|HINT1_MOUSE Adenosine 5-monophosphoramidase HINT1 OS=Mus musculus OX=10090 GN=Hint1 PE=1 SV=3	1	4	4	4	3	4	1	3	3	4	1	3	3	4	1	3	54.8	54.8	54.8	13.777	126	126	4				13	0	69.953	35.7	54.8	11.1	35.7	1715500000	434830000	894050000	157670000	228910000	1085900000	1233300000	0	1213500000
P70362	P70362	2	2	2	Ubiquitin fusion degradation protein 1 homolog	Ufd1l	sp|P70362|UFD1_MOUSE Ubiquitin recognition factor in ER-associated degradation protein 1 OS=Mus musculus OX=10090 GN=Ufd1 PE=1 SV=2	1	2	2	2	0	0	0	2	0	0	0	2	0	0	0	2	8.8	8.8	8.8	34.481	307	307	2		2			0.0014225	11.386	0	0	0	8.8	15206000	0	0	0	15206000	0	0	0	0
P70372	P70372	8	8	8	ELAV-like protein 1	Elavl1	sp|P70372|ELAV1_MOUSE ELAV-like protein 1 OS=Mus musculus OX=10090 GN=Elavl1 PE=1 SV=2	1	8	8	8	2	7	4	2	2	7	4	2	2	7	4	2	24.2	24.2	24.2	36.169	326	326	3			15		0	55.46	6.7	20.9	14.1	6.7	367960000	41334000	150860000	115470000	60294000	81570000	132340000	98854000	149380000
P70392	P70392	4	4	4	Ras-specific guanine nucleotide-releasing factor 2	Rasgrf2	sp|P70392|RGRF2_MOUSE Ras-specific guanine nucleotide-releasing factor 2 OS=Mus musculus OX=10090 GN=Rasgrf2 PE=1 SV=2	1	4	4	4	0	4	1	1	0	4	1	1	0	4	1	1	4.7	4.7	4.7	135.67	1189	1189	1	6				0	28.439	0	4.7	1	1	48176000	0	32407000	6618100	9151100	0	0	0	0
P70398	P70398	15	15	15	Probable ubiquitin carboxyl-terminal hydrolase FAF-X	Usp9x	sp|P70398|USP9X_MOUSE Probable ubiquitin carboxyl-terminal hydrolase FAF-X OS=Mus musculus OX=10090 GN=Usp9x PE=1 SV=2	1	15	15	15	0	14	0	4	0	14	0	4	0	14	0	4	5.6	5.6	5.6	290.71	2559	2559	1	18				0	94.366	0	5.6	0	1.8	235180000	0	196950000	0	38228000	0	40612000	0	13283000
P70404	P70404	7	7	7	Isocitrate dehydrogenase [NAD] subunit gamma 1, mitochondrial	Idh3g	sp|P70404|IDHG1_MOUSE Isocitrate dehydrogenase [NAD] subunit gamma 1, mitochondrial OS=Mus musculus OX=10090 GN=Idh3g PE=1 SV=1	1	7	7	7	3	2	6	5	3	2	6	5	3	2	6	5	19.1	19.1	19.1	42.785	393	393	2.36		14	8		0	64.069	4.6	4.6	15.8	11.5	1096100000	92110000	22139000	734050000	247830000	284980000	200390000	165620000	191160000
P70414	P70414	7	7	7	Sodium/calcium exchanger 1	Slc8a1	sp|P70414|NAC1_MOUSE Sodium/calcium exchanger 1 OS=Mus musculus OX=10090 GN=Slc8a1 PE=1 SV=1	1	7	7	7	0	6	3	4	0	6	3	4	0	6	3	4	7.1	7.1	7.1	108.03	970	970	1	13				0	46.949	0	6	3.1	4.2	225520000	0	108860000	22315000	94348000	0	41400000	41940000	44381000
P70441	P70441	6	6	6	Na(+)/H(+) exchange regulatory cofactor NHE-RF1	Slc9a3r1	sp|P70441|NHRF1_MOUSE Na(+)/H(+) exchange regulatory cofactor NHE-RF1 OS=Mus musculus OX=10090 GN=Slc9a3r1 PE=1 SV=3	1	6	6	6	3	1	3	4	3	1	3	4	3	1	3	4	24.5	24.5	24.5	38.6	355	355	2.42		7	5		0	38.123	13.2	3.1	10.7	14.1	278310000	82685000	11304000	91895000	92428000	0	0	53746000	49037000
P70663	P70663	4	4	4	SPARC-like protein 1	Sparcl1	sp|P70663|SPRL1_MOUSE SPARC-like protein 1 OS=Mus musculus OX=10090 GN=Sparcl1 PE=1 SV=3	1	4	4	4	1	4	0	0	1	4	0	0	1	4	0	0	8	8	8	72.286	650	650	1.4	4		1		0.00073529	23.535	2	8	0	0	69921000	10479000	59442000	0	0	0	0	0	0
P70670;Q60817	P70670;Q60817	4;4	4;4	4;4	Nascent polypeptide-associated complex subunit alpha, muscle-specific form;Nascent polypeptide-associated complex subunit alpha	Naca	sp|P70670|NACAM_MOUSE Nascent polypeptide-associated complex subunit alpha, muscle-specific form OS=Mus musculus OX=10090 GN=Naca PE=1 SV=2;sp|Q60817|NACA_MOUSE Nascent polypeptide-associated complex subunit alpha OS=Mus musculus OX=10090 GN=Naca PE=1 SV=1	2	4	4	4	1	1	3	4	1	1	3	4	1	1	3	4	2.5	2.5	2.5	220.5	2187	2187;215	3			9		0.00076336	24.533	0.7	0.6	1.9	2.5	183990000	6498400	5749100	109110000	62634000	0	0	0	0
P70704;P98200;Q148W0	P70704	16;1;1	16;1;1	16;1;1	Phospholipid-transporting ATPase IA	Atp8a1	sp|P70704|AT8A1_MOUSE Phospholipid-transporting ATPase IA OS=Mus musculus OX=10090 GN=Atp8a1 PE=1 SV=2	3	16	16	16	1	11	6	13	1	11	6	13	1	11	6	13	15.6	15.6	15.6	131.41	1164	1164;1148;1251	1.16	30		1	1	0	113.77	0.8	11.4	5.7	12	686500000	4999100	341020000	77940000	262540000	0	75811000	80031000	80603000
P80313	P80313	8	8	8	T-complex protein 1 subunit eta	Cct7	sp|P80313|TCPH_MOUSE T-complex protein 1 subunit eta OS=Mus musculus OX=10090 GN=Cct7 PE=1 SV=1	1	8	8	8	2	1	4	6	2	1	4	6	2	1	4	6	17.1	17.1	17.1	59.652	544	544	2.13		13	2		0	89.319	3.1	3.1	8.6	12.7	278160000	9599200	7224700	96204000	165130000	0	0	46836000	90954000
P80314	P80314	16	16	16	T-complex protein 1 subunit beta	Cct2	sp|P80314|TCPB_MOUSE T-complex protein 1 subunit beta OS=Mus musculus OX=10090 GN=Cct2 PE=1 SV=4	1	16	16	16	3	3	9	13	3	3	9	13	3	3	9	13	42.4	42.4	42.4	57.477	535	535	2.23		25	5	1	0	122.03	6	6	23.7	33.1	1239600000	63828000	27674000	543520000	604560000	123190000	42410000	168220000	220000000
P80315	P80315	11	11	11	T-complex protein 1 subunit delta	Cct4	sp|P80315|TCPD_MOUSE T-complex protein 1 subunit delta OS=Mus musculus OX=10090 GN=Cct4 PE=1 SV=3	1	11	11	11	2	2	8	10	2	2	8	10	2	2	8	10	23	23	23	58.066	539	539	2.27		20	5	1	0	90.075	4.8	3.9	17.1	20.4	978400000	50048000	30788000	402130000	495440000	97548000	79129000	142570000	214160000
P80316	P80316	11	11	11	T-complex protein 1 subunit epsilon	Cct5	sp|P80316|TCPE_MOUSE T-complex protein 1 subunit epsilon OS=Mus musculus OX=10090 GN=Cct5 PE=1 SV=1	1	11	11	11	0	0	7	9	0	0	7	9	0	0	7	9	23.5	23.5	23.5	59.623	541	541	2		16			0	96.212	0	0	14	18.5	472850000	0	0	305190000	167650000	0	0	97261000	72523000
P80317;Q61390	P80317	12;4	12;4	12;4	T-complex protein 1 subunit zeta	Cct6a	sp|P80317|TCPZ_MOUSE T-complex protein 1 subunit zeta OS=Mus musculus OX=10090 GN=Cct6a PE=1 SV=3	2	12	12	12	1	1	10	9	1	1	10	9	1	1	10	9	28.1	28.1	28.1	58.004	531	531;531	2.09		21	2		0	99.194	1.7	1.7	21.7	19.6	696790000	13988000	16711000	356230000	309860000	0	0	100150000	101050000
P80318	P80318	11	11	11	T-complex protein 1 subunit gamma	Cct3	sp|P80318|TCPG_MOUSE T-complex protein 1 subunit gamma OS=Mus musculus OX=10090 GN=Cct3 PE=1 SV=1	1	11	11	11	3	4	7	11	3	4	7	11	3	4	7	11	22.8	22.8	22.8	60.629	545	545	2.21		24	4	1	0	97.577	6.1	7.7	16.5	22.8	980490000	79549000	36154000	313540000	551240000	83015000	103730000	89934000	129350000
P83510	P83510	10	10	6	Traf2 and NCK-interacting protein kinase	Tnik	sp|P83510|TNIK_MOUSE Traf2 and NCK-interacting protein kinase OS=Mus musculus OX=10090 GN=Tnik PE=1 SV=2	1	10	10	6	0	6	3	6	0	6	3	6	0	4	0	5	7.9	7.9	5.1	150.37	1323	1323	1	16				0	61.371	0	5.1	2.3	5.2	181720000	0	103300000	29513000	48904000	0	24651000	0	25091000
P83940	P83940	2	2	2	Transcription elongation factor B polypeptide 1	Tceb1	sp|P83940|ELOC_MOUSE Elongin-C OS=Mus musculus OX=10090 GN=Eloc PE=1 SV=1	1	2	2	2	1	0	1	0	1	0	1	0	1	0	1	0	18.8	18.8	18.8	12.473	112	112	4				2	0.001004	11.845	10.7	0	8	0	76075000	62660000	0	13416000	0	0	0	0	0
P84075	P84075	10	10	3	Neuron-specific calcium-binding protein hippocalcin	Hpca	sp|P84075|HPCA_MOUSE Neuron-specific calcium-binding protein hippocalcin OS=Mus musculus OX=10090 GN=Hpca PE=1 SV=2	1	10	10	3	6	9	5	7	6	9	5	7	2	3	1	2	55.4	55.4	19.2	22.427	193	193	3.73			13	35	0	97.487	34.7	51.8	26.4	44	3363700000	740460000	1728100000	432470000	462730000	743510000	859560000	1142400000	1216000000
P84084	P84084	7	2	2	ADP-ribosylation factor 5	Arf5	sp|P84084|ARF5_MOUSE ADP-ribosylation factor 5 OS=Mus musculus OX=10090 GN=Arf5 PE=1 SV=2	1	7	2	2	7	7	6	6	2	2	1	1	2	2	1	1	44.4	10	10	20.529	180	180	3.71			2	5	0	36.16	44.4	44.4	40	40	311680000	98327000	73834000	120250000	19272000	215850000	145190000	0	0
P84086	P84086	4	4	2	Complexin-2	Cplx2	sp|P84086|CPLX2_MOUSE Complexin-2 OS=Mus musculus OX=10090 GN=Cplx2 PE=1 SV=1	1	4	4	2	2	4	1	0	2	4	1	0	1	2	0	0	20.1	20.1	11.2	15.394	134	134	4				9	0	33.431	18.7	20.1	8.2	0	588670000	183430000	354830000	50403000	0	325160000	238720000	0	0
P84089	P84089	2	2	2	Enhancer of rudimentary homolog	Erh	sp|P84089|ERH_MOUSE Enhancer of rudimentary homolog OS=Mus musculus OX=10090 GN=Erh PE=1 SV=1	1	2	2	2	0	0	2	0	0	0	2	0	0	0	2	0	21.2	21.2	21.2	12.259	104	104	4				2	0	30.242	0	0	21.2	0	51830000	0	0	51830000	0	0	0	0	0
P84091	P84091	14	14	14	AP-2 complex subunit mu	Ap2m1	sp|P84091|AP2M1_MOUSE AP-2 complex subunit mu OS=Mus musculus OX=10090 GN=Ap2m1 PE=1 SV=1	1	14	14	14	5	6	11	14	5	6	11	14	5	6	11	14	32.4	32.4	32.4	49.654	435	435	2.21	4	37	14	1	0	323.31	9.4	13.1	24.1	32.4	3333200000	303550000	186060000	1546700000	1297000000	243280000	239580000	347550000	336740000
P84096	P84096	5	4	4	Rho-related GTP-binding protein RhoG	Rhog	sp|P84096|RHOG_MOUSE Rho-related GTP-binding protein RhoG OS=Mus musculus OX=10090 GN=Rhog PE=1 SV=1	1	5	4	4	0	4	1	0	0	3	1	0	0	3	1	0	25.1	19.4	19.4	21.308	191	191	4				4	0.00079936	25.971	0	24.6	5.2	0	68756000	0	57918000	10838000	0	0	0	0	0
P84099	P84099	3	3	3	60S ribosomal protein L19	Rpl19	sp|P84099|RL19_MOUSE 60S ribosomal protein L19 OS=Mus musculus OX=10090 GN=Rpl19 PE=1 SV=1	1	3	3	3	2	3	1	1	2	3	1	1	2	3	1	1	16.8	16.8	16.8	23.466	196	196	3			7		0.0014114	21.46	13.3	16.8	4.6	4.6	155720000	38587000	65773000	43212000	8148400	85395000	74822000	0	0
P84104	P84104	3	3	3	Serine/arginine-rich splicing factor 3	Srsf3	sp|P84104|SRSF3_MOUSE Serine/arginine-rich splicing factor 3 OS=Mus musculus OX=10090 GN=Srsf3 PE=1 SV=1	1	3	3	3	1	3	1	1	1	3	1	1	1	3	1	1	18.9	18.9	18.9	19.329	164	164	3.33			6	3	0.0014094	21.408	5.5	18.9	5.5	5.5	296260000	49492000	159460000	37725000	49579000	0	0	0	0
P85094	P85094	1	1	1	Isochorismatase domain-containing protein 2A, mitochondrial	Isoc2a	sp|P85094|ISC2A_MOUSE Isochorismatase domain-containing protein 2A OS=Mus musculus OX=10090 GN=Isoc2a PE=1 SV=1	1	1	1	1	0	1	0	0	0	1	0	0	0	1	0	0	8.3	8.3	8.3	22.417	206	206	3			1		0.0013717	8.5829	0	8.3	0	0	62335000	0	62335000	0	0	0	0	0	0
P97300	P97300	8	8	8	Neuroplastin	Nptn	sp|P97300|NPTN_MOUSE Neuroplastin OS=Mus musculus OX=10090 GN=Nptn PE=1 SV=3	1	8	8	8	5	3	7	7	5	3	7	7	5	3	7	7	21.9	21.9	21.9	44.373	397	397	2.15	4	24	3	3	0	110	14.9	7.8	17.4	21.7	2508100000	398780000	154900000	913270000	1041100000	676270000	562850000	576310000	581990000
P97315	P97315	3	3	3	Cysteine and glycine-rich protein 1	Csrp1	sp|P97315|CSRP1_MOUSE Cysteine and glycine-rich protein 1 OS=Mus musculus OX=10090 GN=Csrp1 PE=1 SV=3	1	3	3	3	2	3	1	1	2	3	1	1	2	3	1	1	24.4	24.4	24.4	20.583	193	193	3.3			7	3	0	34.381	19.2	24.4	7.8	7.8	1026800000	265210000	638550000	79982000	43027000	608750000	865070000	0	0
P97350	P97350	2	2	2	Plakophilin-1	Pkp1	sp|P97350|PKP1_MOUSE Plakophilin-1 OS=Mus musculus OX=10090 GN=Pkp1 PE=1 SV=1	1	2	2	2	0	2	0	0	0	2	0	0	0	2	0	0	3.2	3.2	3.2	80.895	728	728	1	2				0.0014286	11.418	0	3.2	0	0	10384000	0	10384000	0	0	0	0	0	0
P97351	P97351	9	9	9	40S ribosomal protein S3a	Rps3a	sp|P97351|RS3A_MOUSE 40S ribosomal protein S3a OS=Mus musculus OX=10090 GN=Rps3a PE=1 SV=3	1	9	9	9	3	9	4	3	3	9	4	3	3	9	4	3	34.8	34.8	34.8	29.885	264	264	3			20		0	94.311	11.4	34.8	14.4	9.5	605270000	126280000	301670000	131530000	45793000	155350000	260090000	147820000	170890000
P97371	P97371	5	5	5	Proteasome activator complex subunit 1	Psme1	sp|P97371|PSME1_MOUSE Proteasome activator complex subunit 1 OS=Mus musculus OX=10090 GN=Psme1 PE=1 SV=2	1	5	5	5	0	4	3	0	0	4	3	0	0	4	3	0	22.9	22.9	22.9	28.673	249	249	3			7		0	30.283	0	18.1	14.1	0	82251000	0	50730000	31521000	0	0	47756000	44712000	0
P97372	P97372	3	3	3	Proteasome activator complex subunit 2	Psme2	sp|P97372|PSME2_MOUSE Proteasome activator complex subunit 2 OS=Mus musculus OX=10090 GN=Psme2 PE=1 SV=4	1	3	3	3	0	2	1	0	0	2	1	0	0	2	1	0	11.3	11.3	11.3	27.057	239	239	3			3		0.001287	18.431	0	11.3	3.8	0	15266000	0	13137000	2128700	0	0	0	0	0
P97379	P97379	3	3	3	Ras GTPase-activating protein-binding protein 2	G3bp2	sp|P97379|G3BP2_MOUSE Ras GTPase-activating protein-binding protein 2 OS=Mus musculus OX=10090 GN=G3bp2 PE=1 SV=2	1	3	3	3	1	0	1	3	1	0	1	3	1	0	1	3	6.2	6.2	6.2	54.087	482	482	2		5			0.001233	17.767	2.1	0	2.1	6.2	69670000	4641200	0	15437000	49592000	0	0	0	0
P97384	P97384	5	5	5	Annexin A11	Anxa11	sp|P97384|ANX11_MOUSE Annexin A11 OS=Mus musculus OX=10090 GN=Anxa11 PE=1 SV=2	1	5	5	5	1	0	1	4	1	0	1	4	1	0	1	4	10.5	10.5	10.5	54.079	503	503	2.29		5	2		0	31.959	2.4	0	1.8	8.7	100430000	2860700	0	25544000	72029000	0	0	0	0
P97390	P97390	9	9	9	Vacuolar protein sorting-associated protein 45	Vps45	sp|P97390|VPS45_MOUSE Vacuolar protein sorting-associated protein 45 OS=Mus musculus OX=10090 GN=Vps45 PE=1 SV=1	1	9	9	9	0	0	6	6	0	0	6	6	0	0	6	6	17.9	17.9	17.9	65.052	570	570	2		12			0	54.932	0	0	11.6	11.8	148880000	0	0	68329000	80547000	0	0	27297000	27817000
P97427	P97427	19	16	14	Dihydropyrimidinase-related protein 1	Crmp1	sp|P97427|DPYL1_MOUSE Dihydropyrimidinase-related protein 1 OS=Mus musculus OX=10090 GN=Crmp1 PE=1 SV=1	1	19	16	14	9	11	15	17	8	8	13	15	6	6	12	13	41.4	35	30.9	62.167	572	572	2.21	11	36	17	4	0	323.31	20.3	24.5	30.1	38.5	4524100000	669460000	361860000	1613000000	1879700000	443650000	201470000	385260000	363460000
P97441	P97441	5	5	5	Zinc transporter 3	Slc30a3	sp|P97441|ZNT3_MOUSE Zinc transporter 3 OS=Mus musculus OX=10090 GN=Slc30a3 PE=1 SV=1	1	5	5	5	2	3	5	4	2	3	5	4	2	3	5	4	11.6	11.6	11.6	41.824	388	388	2.53	3	4	11	1	0	42.724	4.6	8.5	11.6	7.7	403520000	45711000	26764000	231780000	99268000	168450000	105580000	347350000	116680000
P97445	P97445	2	2	1	Voltage-dependent P/Q-type calcium channel subunit alpha-1A	Cacna1a	sp|P97445|CAC1A_MOUSE Voltage-dependent P/Q-type calcium channel subunit alpha-1A OS=Mus musculus OX=10090 GN=Cacna1a PE=1 SV=2	1	2	2	1	0	1	0	2	0	1	0	2	0	0	0	1	0.9	0.9	0.4	267.64	2368	2368	1	3				0.0009985	11.781	0	0.5	0	0.9	15340000	0	6607100	0	8732400	0	0	0	0
P97450	P97450	3	3	3	ATP synthase-coupling factor 6, mitochondrial	Atp5j	sp|P97450|ATP5J_MOUSE ATP synthase-coupling factor 6, mitochondrial OS=Mus musculus OX=10090 GN=Atp5pf PE=1 SV=1	1	3	3	3	2	1	0	0	2	1	0	0	2	1	0	0	22.2	22.2	22.2	12.496	108	108	4				3	0.0011779	17.04	17.6	13	0	0	77159000	36716000	40442000	0	0	0	0	0	0
P97461	P97461	3	3	3	40S ribosomal protein S5;40S ribosomal protein S5, N-terminally processed	Rps5	sp|P97461|RS5_MOUSE 40S ribosomal protein S5 OS=Mus musculus OX=10090 GN=Rps5 PE=1 SV=3	1	3	3	3	2	3	2	0	2	3	2	0	2	3	2	0	5.4	5.4	5.4	22.889	204	204	3.14			6	1	0.0014276	22.362	4.9	5.4	4.9	0	92602000	17728000	64580000	10295000	0	51817000	61047000	34662000	0
P97494	P97494	4	4	4	Glutamate--cysteine ligase catalytic subunit	Gclc	sp|P97494|GSH1_MOUSE Glutamate--cysteine ligase catalytic subunit OS=Mus musculus OX=10090 GN=Gclc PE=1 SV=4	1	4	4	4	0	1	1	4	0	1	1	4	0	1	1	4	6.3	6.3	6.3	72.571	637	637	1.83	1	5			0.00071685	22.691	0	1.4	1.4	6.3	51101000	0	10086000	8044800	32970000	0	0	0	0
P97765	P97765	4	4	4	WW domain-binding protein 2	Wbp2	sp|P97765|WBP2_MOUSE WW domain-binding protein 2 OS=Mus musculus OX=10090 GN=Wbp2 PE=1 SV=1	1	4	4	4	2	4	2	2	2	4	2	2	2	4	2	2	13	13	13	28.032	261	261	3			11		0	37.557	3.8	13	7.7	3.8	257060000	21660000	88341000	111060000	36002000	54623000	75293000	135010000	124370000
P97772	P97772	2	2	2	Metabotropic glutamate receptor 1	Grm1	sp|P97772|GRM1_MOUSE Metabotropic glutamate receptor 1 OS=Mus musculus OX=10090 GN=Grm1 PE=1 SV=2	1	2	2	2	0	2	0	0	0	2	0	0	0	2	0	0	1.6	1.6	1.6	133.21	1199	1199	1	2				0.0014198	11.373	0	1.6	0	0	9044600	0	9044600	0	0	0	0	0	0
P97797	P97797	10	10	10	Tyrosine-protein phosphatase non-receptor type substrate 1	Sirpa	sp|P97797|SHPS1_MOUSE Tyrosine-protein phosphatase non-receptor type substrate 1 OS=Mus musculus OX=10090 GN=Sirpa PE=1 SV=2	1	10	10	10	2	10	5	7	2	10	5	7	2	10	5	7	22.4	22.4	22.4	56.413	513	513	1.16	28	1	2		0	91.583	5.8	22.4	14.8	19.3	2427200000	138790000	1194400000	333850000	760170000	261880000	371540000	253380000	245290000
P97798	P97798	1	1	1	Neogenin	Neo1	sp|P97798|NEO1_MOUSE Neogenin OS=Mus musculus OX=10090 GN=Neo1 PE=1 SV=1	1	1	1	1	0	1	1	0	0	1	1	0	0	1	1	0	0.7	0.7	0.7	163.16	1493	1493	1	2				0.0034115	6.4122	0	0.7	0.7	0	10027000	0	6930200	3096600	0	0	0	0	0
P97807	P97807	14	14	14	Fumarate hydratase, mitochondrial	Fh	sp|P97807|FUMH_MOUSE Fumarate hydratase, mitochondrial OS=Mus musculus OX=10090 GN=Fh PE=1 SV=3	1	14	14	14	5	3	9	13	5	3	9	13	5	3	9	13	34.9	34.9	34.9	54.356	507	507	2.26		31	6	2	0	162.32	13.2	7.9	19.5	33.9	2261300000	178480000	50257000	798290000	1234300000	204180000	162290000	161930000	171890000
P97822	P97822	2	2	2	Acidic leucine-rich nuclear phosphoprotein 32 family member E	Anp32e	sp|P97822|AN32E_MOUSE Acidic leucine-rich nuclear phosphoprotein 32 family member E OS=Mus musculus OX=10090 GN=Anp32e PE=1 SV=2	1	2	2	2	1	1	1	2	1	1	1	2	1	1	1	2	5.4	5.4	5.4	29.622	260	260	3			5		0.000757	24.366	5.4	4.6	4.6	5.4	86517000	14977000	19347000	20850000	31344000	0	0	0	0
P97930	P97930	2	2	2	Thymidylate kinase	Dtymk	sp|P97930|KTHY_MOUSE Thymidylate kinase OS=Mus musculus OX=10090 GN=Dtymk PE=1 SV=2	1	2	2	2	1	2	0	0	1	2	0	0	1	2	0	0	5.7	5.7	5.7	23.914	212	212	3			3		0.0010753	12.644	5.2	5.7	0	0	20249000	7490100	12759000	0	0	0	0	0	0
P97950;O35963	P97950;O35963	3;2	3;2	3;2	Ras-related protein Rab-33A;Ras-related protein Rab-33B	Rab33a;Rab33b	sp|P97950|RB33A_MOUSE Ras-related protein Rab-33A OS=Mus musculus OX=10090 GN=Rab33a PE=2 SV=1;sp|O35963|RB33B_MOUSE Ras-related protein Rab-33B OS=Mus musculus OX=10090 GN=Rab33b PE=1 SV=1	2	3	3	3	0	2	1	0	0	2	1	0	0	2	1	0	13.9	13.9	13.9	26.54	237	237;229	3			3		0.0011848	17.135	0	9.3	4.6	0	34753000	0	19445000	15308000	0	0	0	0	0
P98086	P98086	2	2	2	Complement C1q subcomponent subunit A	C1qa	sp|P98086|C1QA_MOUSE Complement C1q subcomponent subunit A OS=Mus musculus OX=10090 GN=C1qa PE=1 SV=2	1	2	2	2	0	0	2	0	0	0	2	0	0	0	2	0	9.8	9.8	9.8	25.974	245	245	3			2		0.0010875	12.897	0	0	9.8	0	33872000	0	0	33872000	0	0	0	0	0
P99024	P99024	25	6	5	Tubulin beta-5 chain	Tubb5	sp|P99024|TBB5_MOUSE Tubulin beta-5 chain OS=Mus musculus OX=10090 GN=Tubb5 PE=1 SV=1	1	25	6	5	19	20	20	24	5	5	5	6	4	4	4	5	57.2	19.6	16.2	49.67	444	444	2.38	16	39	21	15	0	323.31	52.3	52.3	51.4	56.3	36056000000	4690000000	3440400000	12931000000	14995000000	4679500000	5871300000	4461400000	5952900000
P99026	P99026	3	3	3	Proteasome subunit beta type-4	Psmb4	sp|P99026|PSB4_MOUSE Proteasome subunit beta type-4 OS=Mus musculus OX=10090 GN=Psmb4 PE=1 SV=1	1	3	3	3	1	3	2	1	1	3	2	1	1	3	2	1	12.9	12.9	12.9	29.116	264	264	3			7		0.0013167	18.902	3.4	12.9	7.2	3.4	311300000	40973000	140980000	98688000	30656000	0	188410000	173880000	0
P99027	P99027	4	4	4	60S acidic ribosomal protein P2	Rplp2	sp|P99027|RLA2_MOUSE 60S acidic ribosomal protein P2 OS=Mus musculus OX=10090 GN=Rplp2 PE=1 SV=3	1	4	4	4	1	4	2	1	1	4	2	1	1	4	2	1	47.8	47.8	47.8	11.651	115	115	4				8	0.00082169	27.248	10.4	47.8	27	16.5	458210000	70507000	339230000	35059000	13411000	0	0	0	0
P99029	P99029	11	11	11	Peroxiredoxin-5, mitochondrial	Prdx5	sp|P99029|PRDX5_MOUSE Peroxiredoxin-5, mitochondrial OS=Mus musculus OX=10090 GN=Prdx5 PE=1 SV=2	1	11	11	11	9	11	7	9	9	11	7	9	9	11	7	9	46.2	46.2	46.2	21.897	210	210	3.98			1	45	0	204.92	38.1	46.2	37.6	38.1	9330900000	2107800000	5265500000	658840000	1298900000	1969500000	2100900000	1154000000	1937600000
Q00493	Q00493	5	5	5	Carboxypeptidase E	Cpe	sp|Q00493|CBPE_MOUSE Carboxypeptidase E OS=Mus musculus OX=10090 GN=Cpe PE=1 SV=2	1	5	5	5	0	0	1	4	0	0	1	4	0	0	1	4	14.9	14.9	14.9	53.255	476	476	2		5			0	34.434	0	0	2.1	12.8	104840000	0	0	13734000	91104000	0	0	0	0
Q00558	Q00558	2	2	2	Factor VIII intron 22 protein	F8a1	sp|Q00558|HAP40_MOUSE 40-kDa huntingtin-associated protein OS=Mus musculus OX=10090 GN=F8a1 PE=1 SV=2	1	2	2	2	0	0	2	0	0	0	2	0	0	0	2	0	7.1	7.1	7.1	40.473	381	381	2.5		1	1		0.0014151	11.361	0	0	7.1	0	10100000	0	0	10100000	0	0	0	0	0
Q00612;P97324	Q00612;P97324	2;1	2;1	2;1	Glucose-6-phosphate 1-dehydrogenase X;Glucose-6-phosphate 1-dehydrogenase 2	G6pdx;G6pd2	sp|Q00612|G6PD1_MOUSE Glucose-6-phosphate 1-dehydrogenase X OS=Mus musculus OX=10090 GN=G6pdx PE=1 SV=3;sp|P97324|G6PD2_MOUSE Glucose-6-phosphate 1-dehydrogenase 2 OS=Mus musculus OX=10090 GN=G6pd2 PE=1 SV=3	2	2	2	2	0	0	1	1	0	0	1	1	0	0	1	1	3.7	3.7	3.7	59.262	515	515;513	2		2			0.0011217	13.59	0	0	1.6	2.1	26969000	0	0	5189100	21780000	0	0	0	0
Q00623	Q00623	7	7	7	Apolipoprotein A-I;Proapolipoprotein A-I;Truncated apolipoprotein A-I	Apoa1	sp|Q00623|APOA1_MOUSE Apolipoprotein A-I OS=Mus musculus OX=10090 GN=Apoa1 PE=1 SV=2	1	7	7	7	4	5	1	2	4	5	1	2	4	5	1	2	24.2	24.2	24.2	30.615	264	264	3			13		0	52.848	15.9	15.9	3.4	8.3	567060000	382190000	126290000	14632000	43942000	741850000	89869000	0	0
Q00897	Q00897	3	3	1	Alpha-1-antitrypsin 1-4	Serpina1d	sp|Q00897|A1AT4_MOUSE Alpha-1-antitrypsin 1-4 OS=Mus musculus OX=10090 GN=Serpina1d PE=1 SV=1	1	3	3	1	1	0	2	1	1	0	2	1	0	0	1	0	7.3	7.3	2.4	45.998	413	413	2		4			0.0013271	19.041	2.4	0	4.8	2.4	42033000	18642000	0	8973200	14418000	0	0	0	0
Q00915	Q00915	1	1	1	Retinol-binding protein 1	Rbp1	sp|Q00915|RET1_MOUSE Retinol-binding protein 1 OS=Mus musculus OX=10090 GN=Rbp1 PE=1 SV=2	1	1	1	1	1	1	1	1	1	1	1	1	1	1	1	1	6.7	6.7	6.7	15.846	135	135	4				4	0.0021872	6.6922	6.7	6.7	6.7	6.7	32814000	9213400	14872000	5425600	3302700	0	0	0	0
Q00PI9	Q00PI9	7	7	7	Heterogeneous nuclear ribonucleoprotein U-like protein 2	Hnrnpul2	sp|Q00PI9|HNRL2_MOUSE Heterogeneous nuclear ribonucleoprotein U-like protein 2 OS=Mus musculus OX=10090 GN=Hnrnpul2 PE=1 SV=2	1	7	7	7	0	5	1	4	0	5	1	4	0	5	1	4	8.9	8.9	8.9	84.939	745	745	1	10				0	44.8	0	7.4	1.3	5.8	131740000	0	81768000	7099300	42873000	0	24779000	0	23966000
Q01065	Q01065	6	5	5	Calcium/calmodulin-dependent 3,5-cyclic nucleotide phosphodiesterase 1B	Pde1b	sp|Q01065|PDE1B_MOUSE Calcium/calmodulin-dependent 3,5-cyclic nucleotide phosphodiesterase 1B OS=Mus musculus OX=10090 GN=Pde1b PE=1 SV=2	1	6	5	5	1	0	4	6	0	0	3	5	0	0	3	5	12	9.3	9.3	61.225	535	535	2		8			0	32.258	2.6	0	8.8	12	130030000	0	0	54162000	75864000	0	0	43525000	30235000
Q01097	Q01097	9	9	9	Glutamate receptor ionotropic, NMDA 2B	Grin2b	sp|Q01097|NMDE2_MOUSE Glutamate receptor ionotropic, NMDA 2B OS=Mus musculus OX=10090 GN=Grin2b PE=1 SV=3	1	9	9	9	0	8	1	4	0	8	1	4	0	8	1	4	7.4	7.4	7.4	165.96	1482	1482	1.15	11	2			0	59.919	0	6.1	0.7	3.8	188060000	0	115820000	13518000	58727000	0	29463000	0	36038000
Q01405;Q9D662	Q01405;Q9D662	2;1	2;1	2;1	Protein transport protein Sec23A;Protein transport protein Sec23B	Sec23a;Sec23b	sp|Q01405|SC23A_MOUSE Protein transport protein Sec23A OS=Mus musculus OX=10090 GN=Sec23a PE=1 SV=2;sp|Q9D662|SC23B_MOUSE Protein transport protein Sec23B OS=Mus musculus OX=10090 GN=Sec23b PE=1 SV=1	2	2	2	2	0	2	1	0	0	2	1	0	0	2	1	0	3.5	3.5	3.5	86.161	765	765;767	1	3				0.0010101	11.912	0	3.5	2.2	0	25239000	0	16504000	8735300	0	0	0	0	0
Q01730	Q01730	2	2	2	Ras suppressor protein 1	Rsu1	sp|Q01730|RSU1_MOUSE Ras suppressor protein 1 OS=Mus musculus OX=10090 GN=Rsu1 PE=1 SV=3	1	2	2	2	0	1	2	1	0	1	2	1	0	1	2	1	6.5	6.5	6.5	31.55	277	277	3			4		0.0014361	11.473	0	3.2	6.5	3.2	35187000	0	11016000	16956000	7215300	0	0	0	0
Q01768	Q01768	6	2	2	Nucleoside diphosphate kinase B	Nme2	sp|Q01768|NDKB_MOUSE Nucleoside diphosphate kinase B OS=Mus musculus OX=10090 GN=Nme2 PE=1 SV=1	1	6	2	2	5	6	5	5	2	2	1	1	2	2	1	1	40.8	15.8	15.8	17.363	152	152	4				9	0	52.353	29.6	40.8	34.2	34.2	1323500000	403730000	500450000	367630000	51657000	752730000	482640000	0	0
Q01853	Q01853	28	28	28	Transitional endoplasmic reticulum ATPase	Vcp	sp|Q01853|TERA_MOUSE Transitional endoplasmic reticulum ATPase OS=Mus musculus OX=10090 GN=Vcp PE=1 SV=4	1	28	28	28	8	23	14	19	8	23	14	19	8	23	14	19	36.8	36.8	36.8	89.321	806	806	1.57	60	23	10	4	0	263.01	9.8	34.4	21.5	26.2	4373800000	172570000	2246300000	793380000	1161500000	187460000	227180000	185500000	196780000
Q02053;P31254	Q02053	24;5	24;5	24;5	Ubiquitin-like modifier-activating enzyme 1	Uba1	sp|Q02053|UBA1_MOUSE Ubiquitin-like modifier-activating enzyme 1 OS=Mus musculus OX=10090 GN=Uba1 PE=1 SV=1	2	24	24	24	5	23	12	15	5	23	12	15	5	23	12	15	30.2	30.2	30.2	117.81	1058	1058;1058	1.58	56	29	9	3	0	195.57	5.4	28	14.6	20.2	5021300000	149080000	2160700000	886440000	1825100000	108450000	289180000	210410000	294510000
Q02105	Q02105	3	3	3	Complement C1q subcomponent subunit C	C1qc	sp|Q02105|C1QC_MOUSE Complement C1q subcomponent subunit C OS=Mus musculus OX=10090 GN=C1qc PE=1 SV=2	1	3	3	3	0	3	2	1	0	3	2	1	0	3	2	1	15	15	15	25.991	246	246	3			6		0.0012912	18.536	0	15	11	7.3	271610000	0	76167000	173170000	22275000	0	0	0	0
Q02248	Q02248	14	12	12	Catenin beta-1	Ctnnb1	sp|Q02248|CTNB1_MOUSE Catenin beta-1 OS=Mus musculus OX=10090 GN=Ctnnb1 PE=1 SV=1	1	14	12	12	4	12	5	7	3	10	4	7	3	10	4	7	20.6	18.7	18.7	85.47	781	781	1.3	23	5	2		0	81.587	6.1	17.9	6	10.8	735600000	29480000	372970000	68890000	264270000	65856000	101360000	75817000	103430000
Q02257	Q02257	14	14	12	Junction plakoglobin	Jup	sp|Q02257|PLAK_MOUSE Junction plakoglobin OS=Mus musculus OX=10090 GN=Jup PE=1 SV=3	1	14	14	12	2	13	4	4	2	13	4	4	1	11	3	4	22	22	20	81.8	745	745	1.73	18	5	4	3	0	135.28	3.1	20.8	5.2	7	734950000	37544000	603610000	30464000	63334000	50061000	157810000	15431000	33443000
Q02357	Q02357	5	3	3	Ankyrin-1	Ank1	sp|Q02357|ANK1_MOUSE Ankyrin-1 OS=Mus musculus OX=10090 GN=Ank1 PE=1 SV=2	1	5	3	3	1	5	1	2	0	3	0	1	0	3	0	1	2.5	1.9	1.9	204.22	1862	1862	1	4				0.0012453	17.894	0.6	2.5	0.6	1.3	23216000	0	19495000	0	3720600	0	0	0	0
Q02819	Q02819	1	1	1	Nucleobindin-1	Nucb1	sp|Q02819|NUCB1_MOUSE Nucleobindin-1 OS=Mus musculus OX=10090 GN=Nucb1 PE=1 SV=2	1	1	1	1	0	0	1	1	0	0	1	1	0	0	1	1	2.4	2.4	2.4	53.408	459	459	2		2			0.0013544	7.544	0	0	2.4	2.4	10682000	0	0	5638200	5043300	0	0	0	0
Q03137;P54754;Q8CBF3;Q62413	Q03137	5;1;1;1	5;1;1;1	5;1;1;1	Ephrin type-A receptor 4	Epha4	sp|Q03137|EPHA4_MOUSE Ephrin type-A receptor 4 OS=Mus musculus OX=10090 GN=Epha4 PE=1 SV=2	4	5	5	5	0	4	0	2	0	4	0	2	0	4	0	2	7.3	7.3	7.3	109.81	986	986;993;984;1035	1	6				0	31.29	0	5.2	0	3.4	81524000	0	60646000	0	20877000	0	0	0	0
Q03173	Q03173	3	3	3	Protein enabled homolog	Enah	sp|Q03173|ENAH_MOUSE Protein enabled homolog OS=Mus musculus OX=10090 GN=Enah PE=1 SV=2	1	3	3	3	0	2	1	0	0	2	1	0	0	2	1	0	4.1	4.1	4.1	85.843	802	802	1	3				0.0013405	19.295	0	2.9	1.2	0	26100000	0	17948000	8152100	0	0	0	0	0
Q03265	Q03265	28	28	28	ATP synthase subunit alpha, mitochondrial	Atp5a1	sp|Q03265|ATPA_MOUSE ATP synthase subunit alpha, mitochondrial OS=Mus musculus OX=10090 GN=Atp5f1a PE=1 SV=1	1	28	28	28	22	24	26	27	22	24	26	27	22	24	26	27	57	57	57	59.752	553	553	2.39	35	135	73	35	0	323.31	47.2	49.9	53.5	56.8	71404000000	9937500000	5950400000	24797000000	30719000000	3056700000	3921300000	3178200000	3543800000
Q04447;P07310	Q04447	17;1	17;1	17;1	Creatine kinase B-type	Ckb	sp|Q04447|KCRB_MOUSE Creatine kinase B-type OS=Mus musculus OX=10090 GN=Ckb PE=1 SV=1	2	17	17	17	16	13	15	16	16	13	15	16	16	13	15	16	60.6	60.6	60.6	42.713	381	381;381	2.5	16	107	71	28	0	323.31	54.1	43.8	54.1	57.7	71270000000	10039000000	6747200000	22641000000	31843000000	5466700000	5710900000	4280600000	5730800000
Q04519	Q04519	2	2	2	Sphingomyelin phosphodiesterase	Smpd1	sp|Q04519|ASM_MOUSE Sphingomyelin phosphodiesterase OS=Mus musculus OX=10090 GN=Smpd1 PE=1 SV=2	1	2	2	2	0	0	0	2	0	0	0	2	0	0	0	2	3.2	3.2	3.2	69.926	627	627	2		2			0.00099602	11.765	0	0	0	3.2	11424000	0	0	0	11424000	0	0	0	0
Q04735;O35495	Q04735;O35495	4;2	3;1	1;1	Cyclin-dependent kinase 16;Cyclin-dependent kinase 14	Cdk16;Cdk14	sp|Q04735|CDK16_MOUSE Cyclin-dependent kinase 16 OS=Mus musculus OX=10090 GN=Cdk16 PE=1 SV=1;sp|O35495|CDK14_MOUSE Cyclin-dependent kinase 14 OS=Mus musculus OX=10090 GN=Cdk14 PE=1 SV=2	2	4	3	1	1	1	3	3	0	0	2	2	0	0	0	1	7.9	6.2	1.6	55.913	496	496;469	2		4			0.001278	18.249	1.6	1.6	6.2	5.6	43434000	0	0	18814000	24620000	0	0	0	0
Q04758	Q04758	1	1	1	cAMP-dependent protein kinase inhibitor beta	Pkib	sp|Q04758|IPKB_MOUSE cAMP-dependent protein kinase inhibitor beta OS=Mus musculus OX=10090 GN=Pkib PE=3 SV=1	1	1	1	1	0	1	0	1	0	1	0	1	0	1	0	1	12	12	12	9.6815	92	92	1	2				0.001378	9.5296	0	12	0	12	69280000	0	24462000	0	44818000	0	0	0	0
Q04899	Q04899	4	2	2	Cyclin-dependent kinase 18	Cdk18	sp|Q04899|CDK18_MOUSE Cyclin-dependent kinase 18 OS=Mus musculus OX=10090 GN=Cdk18 PE=1 SV=1	1	4	2	2	1	1	3	3	0	0	1	1	0	0	1	1	9.5	5.1	5.1	51.847	451	451	2		2			0.0011161	13.453	1.8	1.8	7.1	6.9	11265000	0	0	5990100	5274500	0	0	0	0
Q05512	Q05512	4	3	3	Serine/threonine-protein kinase MARK2	Mark2	sp|Q05512|MARK2_MOUSE Serine/threonine-protein kinase MARK2 OS=Mus musculus OX=10090 GN=Mark2 PE=1 SV=3	1	4	3	3	1	4	1	1	0	3	0	0	0	3	0	0	6.4	5.3	5.3	86.305	776	776	1	3				0.0013004	18.723	1.2	6.4	1.2	1.2	48930000	0	48930000	0	0	0	0	0	0
Q05793	Q05793	6	6	6	Basement membrane-specific heparan sulfate proteoglycan core protein;Endorepellin;LG3 peptide	Hspg2	sp|Q05793|PGBM_MOUSE Basement membrane-specific heparan sulfate proteoglycan core protein OS=Mus musculus OX=10090 GN=Hspg2 PE=1 SV=1	1	6	6	6	0	3	1	2	0	3	1	2	0	3	1	2	1.7	1.7	1.7	398.29	3707	3707	1	6				0	36.406	0	0.9	0.2	0.5	34168000	0	19792000	4363400	10012000	0	0	0	0
Q05816	Q05816	3	3	3	Fatty acid-binding protein, epidermal	Fabp5	sp|Q05816|FABP5_MOUSE Fatty acid-binding protein 5 OS=Mus musculus OX=10090 GN=Fabp5 PE=1 SV=3	1	3	3	3	2	3	0	1	2	3	0	1	2	3	0	1	22.2	22.2	22.2	15.137	135	135	3.45	2			9	0	44.028	15.6	22.2	0	6.7	563510000	145600000	363020000	0	54885000	344320000	339920000	0	0
Q05920	Q05920	18	18	18	Pyruvate carboxylase, mitochondrial	Pc	sp|Q05920|PYC_MOUSE Pyruvate carboxylase, mitochondrial OS=Mus musculus OX=10090 GN=Pc PE=1 SV=1	1	18	18	18	2	13	3	15	2	13	3	15	2	13	3	15	18	18	18	129.68	1178	1178	1.22	31	3	1	1	0	130.12	1.6	13	2.9	14.9	860140000	21056000	428330000	38071000	372690000	21207000	136130000	26945000	125470000
Q06138	Q06138	6	6	6	Calcium-binding protein 39	Cab39	sp|Q06138|CAB39_MOUSE Calcium-binding protein 39 OS=Mus musculus OX=10090 GN=Cab39 PE=1 SV=2	1	6	6	6	0	3	5	3	0	3	5	3	0	3	5	3	15.2	15.2	15.2	39.842	341	341	2.92		1	12		0	37.801	0	9.7	15.2	9.7	326530000	0	84089000	167910000	74537000	0	82936000	123200000	149640000
Q06185	Q06185	4	4	4	ATP synthase subunit e, mitochondrial	Atp5i	sp|Q06185|ATP5I_MOUSE ATP synthase subunit e, mitochondrial OS=Mus musculus OX=10090 GN=Atp5me PE=1 SV=2	1	4	4	4	3	4	3	2	3	4	3	2	3	4	3	2	60.6	60.6	60.6	8.2355	71	71	3.86	1			20	0	158.02	50.7	60.6	42.3	32.4	3165000000	796100000	1483600000	516800000	368520000	2036500000	1438800000	1297100000	1803700000
Q06890	Q06890	3	3	3	Clusterin;Clusterin beta chain;Clusterin alpha chain	Clu	sp|Q06890|CLUS_MOUSE Clusterin OS=Mus musculus OX=10090 GN=Clu PE=1 SV=1	1	3	3	3	1	1	2	1	1	1	2	1	1	1	2	1	7.8	7.8	7.8	51.655	448	448	2.8		1	4		0.0013918	20.568	2	2	4.2	3.6	72820000	8152000	13054000	19171000	32442000	0	0	0	0
Q07076	Q07076	6	6	6	Annexin A7	Anxa7	sp|Q07076|ANXA7_MOUSE Annexin A7 OS=Mus musculus OX=10090 GN=Anxa7 PE=1 SV=2	1	6	6	6	5	2	5	4	5	2	5	4	5	2	5	4	13.6	13.6	13.6	49.925	463	463	2.35		14	5	1	0	45.035	11.2	5.2	11.9	9.9	451180000	72313000	7732100	187100000	184030000	74486000	69239000	65831000	58522000
Q08189	Q08189	1	1	1	Protein-glutamine gamma-glutamyltransferase E;Protein-glutamine gamma-glutamyltransferase E 50 kDa catalytic chain;Protein-glutamine gamma-glutamyltransferase E 27 kDa non-catalytic chain	Tgm3	sp|Q08189|TGM3_MOUSE Protein-glutamine gamma-glutamyltransferase E OS=Mus musculus OX=10090 GN=Tgm3 PE=1 SV=2	1	1	1	1	0	1	0	0	0	1	0	0	0	1	0	0	1.9	1.9	1.9	77.308	693	693	1	1				0.0078969	6.2728	0	1.9	0	0	25259000	0	25259000	0	0	0	0	0	0
Q08331	Q08331	5	4	4	Calretinin	Calb2	sp|Q08331|CALB2_MOUSE Calretinin OS=Mus musculus OX=10090 GN=Calb2 PE=1 SV=3	1	5	4	4	2	3	2	1	1	3	2	0	1	3	2	0	20.3	16.2	16.2	31.372	271	271	3			7		0.00081433	26.607	7.7	12.2	7.7	4.1	116600000	33246000	36935000	46420000	0	0	0	0	0
Q08460	Q08460	5	5	5	Calcium-activated potassium channel subunit alpha-1	Kcnma1	sp|Q08460|KCMA1_MOUSE Calcium-activated potassium channel subunit alpha-1 OS=Mus musculus OX=10090 GN=Kcnma1 PE=1 SV=2	1	5	5	5	0	5	0	0	0	5	0	0	0	5	0	0	5.5	5.5	5.5	134.39	1209	1209	1	5				0	31.453	0	5.5	0	0	64829000	0	64829000	0	0	0	0	0	0
Q0KL02	Q0KL02	11	11	8	Triple functional domain protein	Trio	sp|Q0KL02|TRIO_MOUSE Triple functional domain protein OS=Mus musculus OX=10090 GN=Trio PE=1 SV=3	1	11	11	8	0	11	0	2	0	11	0	2	0	8	0	0	4.4	4.4	3.4	347.86	3102	3102	1	13				0	68.599	0	4.4	0	0.6	203990000	0	168050000	0	35936000	0	43758000	0	13530000
Q0VBF8	Q0VBF8	3	3	3	Protein stum homolog		sp|Q0VBF8|STUM_MOUSE Protein stum homolog OS=Mus musculus OX=10090 GN=Stum PE=1 SV=1	1	3	3	3	0	3	2	3	0	3	2	3	0	3	2	3	27	27	27	15.005	141	141	2.75	5	2	6	7	0	37.893	0	27	21.3	27	425490000	0	240330000	102810000	82347000	0	159630000	239100000	81482000
Q11011	Q11011	25	25	25	Puromycin-sensitive aminopeptidase	Npepps	sp|Q11011|PSA_MOUSE Puromycin-sensitive aminopeptidase OS=Mus musculus OX=10090 GN=Npepps PE=1 SV=2	1	25	25	25	11	22	12	21	11	22	12	21	11	22	12	21	28.8	28.8	28.8	103.32	920	920	1.65	55	14	16	4	0	175.02	12.8	25.4	13.5	23.5	2597700000	314980000	1037300000	348480000	896980000	156700000	122750000	104540000	114220000
Q11136	Q11136	2	2	2	Xaa-Pro dipeptidase	Pepd	sp|Q11136|PEPD_MOUSE Xaa-Pro dipeptidase OS=Mus musculus OX=10090 GN=Pepd PE=1 SV=3	1	2	2	2	0	1	2	2	0	1	2	2	0	1	2	2	3.7	3.7	3.7	55.028	493	493	2		5			0.00099651	11.77	0	1.6	3.7	3.7	44098000	0	1724700	17846000	24527000	0	0	15143000	18337000
Q148V7	Q148V7	7	7	7	LisH domain and HEAT repeat-containing protein KIAA1468	Kiaa1468	sp|Q148V7|RELCH_MOUSE RAB11-binding protein RELCH OS=Mus musculus OX=10090 GN=Relch PE=1 SV=1	1	7	7	7	0	7	0	2	0	7	0	2	0	7	0	2	6.7	6.7	6.7	134.59	1216	1216	1.09	10	1			0	42.485	0	6.7	0	1.9	135650000	0	107220000	0	28432000	0	25656000	0	16343000
Q148W8	Q148W8	2	2	2	Inactive dual specificity phosphatase 27	Dusp27	sp|Q148W8|STYL2_MOUSE Serine/threonine/tyrosine-interacting-like protein 2 OS=Mus musculus OX=10090 GN=Styxl2 PE=1 SV=1	1	2	2	2	0	2	0	0	0	2	0	0	0	2	0	0	2.8	2.8	2.8	128.57	1138	1138	2	1		1		0.0013934	11.153	0	2.8	0	0	23069000	0	23069000	0	0	0	0	0	0
Q14BB9	Q14BB9	2	2	2	MAP6 domain-containing protein 1	Map6d1	sp|Q14BB9|MA6D1_MOUSE MAP6 domain-containing protein 1 OS=Mus musculus OX=10090 GN=Map6d1 PE=1 SV=1	1	2	2	2	1	2	0	0	1	2	0	0	1	2	0	0	15.7	15.7	15.7	20.432	191	191	3.5			2	2	0.00098087	11.648	11	15.7	0	0	81210000	11761000	69450000	0	0	0	0	0	0
Q14BI2;Q68EF4	Q14BI2	10;1	9;1	9;1	Metabotropic glutamate receptor 2	Grm2	sp|Q14BI2|GRM2_MOUSE Metabotropic glutamate receptor 2 OS=Mus musculus OX=10090 GN=Grm2 PE=1 SV=2	2	10	9	9	1	9	2	5	1	8	2	4	1	8	2	4	12.5	10.8	10.8	95.886	872	872;912	1.19	15			1	0	59.863	1.5	11.7	2.4	6.1	183880000	5656300	137540000	12442000	28238000	0	38398000	17013000	17480000
Q2M3X8;Q501J7	Q2M3X8	9;2	9;2	9;2	Phosphatase and actin regulator 1	Phactr1	sp|Q2M3X8|PHAR1_MOUSE Phosphatase and actin regulator 1 OS=Mus musculus OX=10090 GN=Phactr1 PE=1 SV=1	2	9	9	9	3	7	3	6	3	7	3	6	3	7	3	6	16.2	16.2	16.2	66.285	580	580;694	1.67	10	8	3		0	57.588	6.4	13.4	7.6	10.9	209530000	39411000	95589000	20723000	53805000	47084000	26504000	20201000	24281000
Q2NL51	Q2NL51	5	5	4	Glycogen synthase kinase-3 alpha	Gsk3a	sp|Q2NL51|GSK3A_MOUSE Glycogen synthase kinase-3 alpha OS=Mus musculus OX=10090 GN=Gsk3a PE=1 SV=2	1	5	5	4	1	0	3	5	1	0	3	5	1	0	2	4	12	12	10.2	51.66	490	490	2.11		8	1		0	32.495	2.9	0	6.7	12	238370000	14791000	0	82098000	141480000	0	0	53400000	45723000
Q2PFD7	Q2PFD7	13	13	13	PH and SEC7 domain-containing protein 3	Psd3	sp|Q2PFD7|PSD3_MOUSE PH and SEC7 domain-containing protein 3 OS=Mus musculus OX=10090 GN=Psd3 PE=1 SV=2	1	13	13	13	5	3	8	9	5	3	8	9	5	3	8	9	11.1	11.1	11.1	114.72	1037	1037	2.3		19	8		0	80.608	4.3	3	5.5	8.6	947780000	104020000	24682000	360700000	458380000	176000000	93583000	116610000	123340000
Q9EST1;Q32M21;Q5Y4Y6	Q9EST1;Q32M21;Q5Y4Y6	2;2;1	2;2;1	2;2;1	Gasdermin-A;Gasdermin-A2;Gasdermin-A3	Gsdma;Gsdma2;Gsdma3	sp|Q9EST1|GSDMA_MOUSE Gasdermin-A OS=Mus musculus OX=10090 GN=Gsdma PE=2 SV=1;sp|Q32M21|GSDA2_MOUSE Gasdermin-A2 OS=Mus musculus OX=10090 GN=Gsdma2 PE=2 SV=1;sp|Q5Y4Y6|GSDA3_MOUSE Gasdermin-A3 OS=Mus musculus OX=10090 GN=Gsdma3 PE=1 SV=1	3	2	2	2	0	2	0	0	0	2	0	0	0	2	0	0	4.9	4.9	4.9	49.592	446	446;443;464	2	2			1	0.0010747	12.62	0	4.9	0	0	15686000	0	15686000	0	0	0	0	0	0
Q3B7Z2	Q3B7Z2	2	2	2	Oxysterol-binding protein 1	Osbp	sp|Q3B7Z2|OSBP1_MOUSE Oxysterol-binding protein 1 OS=Mus musculus OX=10090 GN=Osbp PE=1 SV=3	1	2	2	2	0	2	0	0	0	2	0	0	0	2	0	0	2.6	2.6	2.6	88.796	805	805	1	2				0.0014279	11.417	0	2.6	0	0	23090000	0	23090000	0	0	0	0	0	0
Q3TC72	Q3TC72	5	5	5	Fumarylacetoacetate hydrolase domain-containing protein 2A	Fahd2	sp|Q3TC72|FAHD2_MOUSE Fumarylacetoacetate hydrolase domain-containing protein 2A OS=Mus musculus OX=10090 GN=Fahd2 PE=1 SV=1	1	5	5	5	2	5	3	1	2	5	3	1	2	5	3	1	18.8	18.8	18.8	34.69	313	313	3			11		0	38.352	3.8	18.8	7	3.8	175740000	25732000	94746000	50945000	4314200	67632000	88352000	68434000	0
Q3TCN2	Q3TCN2	2	2	2	Putative phospholipase B-like 2;Putative phospholipase B-like 2 28 kDa form;Putative phospholipase B-like 2 40 kDa form;Putative phospholipase B-like 2 15 kDa form	Plbd2	sp|Q3TCN2|PLBL2_MOUSE Putative phospholipase B-like 2 OS=Mus musculus OX=10090 GN=Plbd2 PE=1 SV=2	1	2	2	2	1	2	1	1	1	2	1	1	1	2	1	1	3.2	3.2	3.2	66.289	594	594	2.67	1		5		0.0014191	11.373	2	3.2	2	1.2	39082000	10319000	16968000	9009500	2785800	0	0	0	0
Q3TDD9	Q3TDD9	3	3	3	Protein phosphatase 1 regulatory subunit 21	Ppp1r21	sp|Q3TDD9|PPR21_MOUSE Protein phosphatase 1 regulatory subunit 21 OS=Mus musculus OX=10090 GN=Ppp1r21 PE=1 SV=2	1	3	3	3	0	2	0	2	0	2	0	2	0	2	0	2	5.8	5.8	5.8	88.337	780	780	1	4				0.0012531	17.949	0	4.4	0	3.3	34937000	0	23495000	0	11442000	0	0	0	0
Q3TDK6	Q3TDK6	10	10	10	Protein rogdi homolog	Rogdi	sp|Q3TDK6|ROGDI_MOUSE Protein rogdi homolog OS=Mus musculus OX=10090 GN=Rogdi PE=1 SV=2	1	10	10	10	3	9	6	3	3	9	6	3	3	9	6	3	42.9	42.9	42.9	32.1	287	287	3			23		0	73.558	12.9	38.3	23	12.2	494620000	64476000	255330000	145680000	29130000	99021000	130770000	102200000	71597000
Q3TEA8	Q3TEA8	5	5	5	Heterochromatin protein 1-binding protein 3	Hp1bp3	sp|Q3TEA8|HP1B3_MOUSE Heterochromatin protein 1-binding protein 3 OS=Mus musculus OX=10090 GN=Hp1bp3 PE=1 SV=1	1	5	5	5	1	4	1	4	1	4	1	4	1	4	1	4	8.7	8.7	8.7	60.866	554	554	1.36	8	2	1		0	29.988	2	7	2	6.7	94815000	4189000	44635000	9438800	36552000	0	23347000	0	16659000
Q3TES0	Q3TES0	3	2	2	IQ motif and SEC7 domain-containing protein 3	Iqsec3	sp|Q3TES0|IQEC3_MOUSE IQ motif and SEC7 domain-containing protein 3 OS=Mus musculus OX=10090 GN=Iqsec3 PE=1 SV=1	1	3	2	2	0	2	1	2	0	1	0	1	0	1	0	1	2.3	1.7	1.7	129.12	1195	1195	1	2				0.0013915	11.139	0	1.7	0.7	1.3	9501800	0	9501800	0	0	0	0	0	0
Q3THE2;Q9CQ19	Q3THE2	5;2	5;2	5;2	Myosin regulatory light chain 12B	Myl12b	sp|Q3THE2|ML12B_MOUSE Myosin regulatory light chain 12B OS=Mus musculus OX=10090 GN=Myl12b PE=1 SV=2	2	5	5	5	3	5	2	2	3	5	2	2	3	5	2	2	23.8	23.8	23.8	19.779	172	172;172	4				13	0	36.603	18	23.8	12.2	12.2	403570000	67217000	233510000	52299000	50546000	116960000	0	137520000	179400000
Q3THK7	Q3THK7	3	3	3	GMP synthase [glutamine-hydrolyzing]	Gmps	sp|Q3THK7|GUAA_MOUSE GMP synthase [glutamine-hydrolyzing] OS=Mus musculus OX=10090 GN=Gmps PE=1 SV=2	1	3	3	3	0	2	1	3	0	2	1	3	0	2	1	3	4.9	4.9	4.9	76.723	693	693	1.67	2	4			0.0013012	18.724	0	3	1.6	4.9	99341000	0	16922000	24048000	58371000	0	10425000	0	35183000
Q3THS6;Q91X83	Q3THS6	4;1	4;1	4;1	S-adenosylmethionine synthase isoform type-2	Mat2a	sp|Q3THS6|METK2_MOUSE S-adenosylmethionine synthase isoform type-2 OS=Mus musculus OX=10090 GN=Mat2a PE=1 SV=2	2	4	4	4	2	2	3	4	2	2	3	4	2	2	3	4	11.6	11.6	11.6	43.688	395	395;396	2.18		9	2		0	32.673	6.6	6.6	8.4	11.6	162410000	20633000	9339900	56970000	75465000	49915000	51153000	47308000	51016000
Q6DIC0;Q3TKT4	Q6DIC0;Q3TKT4	2;2	2;2	2;2	Probable global transcription activator SNF2L2;Transcription activator BRG1	Smarca2;Smarca4	sp|Q6DIC0|SMCA2_MOUSE Probable global transcription activator SNF2L2 OS=Mus musculus OX=10090 GN=Smarca2 PE=1 SV=1;sp|Q3TKT4|SMCA4_MOUSE Transcription activator BRG1 OS=Mus musculus OX=10090 GN=Smarca4 PE=1 SV=1	2	2	2	2	1	1	0	1	1	1	0	1	1	1	0	1	1.4	1.4	1.4	180.25	1577	1577;1613	1.67	2		1		0.0010277	12.073	0.6	0.8	0	0.8	18789000	4285600	8310900	0	6192300	0	0	0	0
Q3TPX4	Q3TPX4	3	3	3	Exocyst complex component 5	Exoc5	sp|Q3TPX4|EXOC5_MOUSE Exocyst complex component 5 OS=Mus musculus OX=10090 GN=Exoc5 PE=1 SV=2	1	3	3	3	0	0	0	3	0	0	0	3	0	0	0	3	4	4	4	81.737	708	708	2		3			0.0011806	17.093	0	0	0	4	24438000	0	0	0	24438000	0	0	0	0
Q3TRJ4	Q3TRJ4	1	1	1	Keratin, type I cytoskeletal 26	Krt26	sp|Q3TRJ4|K1C26_MOUSE Keratin, type I cytoskeletal 26 OS=Mus musculus OX=10090 GN=Krt26 PE=2 SV=1	1	1	1	1	0	1	1	1	0	1	1	1	0	1	1	1	1.7	1.7	1.7	51.117	462	462	2.5	3	3	3	3	0	323.31	0	1.7	1.7	1.7	1564900000	0	715260000	606420000	243260000	0	0	0	0
Q3TVA9	Q3TVA9	6	6	6	Coiled-coil domain-containing protein 136	Ccdc136	sp|Q3TVA9|CC136_MOUSE Coiled-coil domain-containing protein 136 OS=Mus musculus OX=10090 GN=Ccdc136 PE=1 SV=2	1	6	6	6	0	0	3	3	0	0	3	3	0	0	3	3	7.1	7.1	7.1	131.93	1136	1136	2.17		5	1		0	35.127	0	0	4	3.2	338520000	0	0	153870000	184650000	0	0	0	0
Q3TW96;Q91YN5	Q3TW96	3;1	3;1	3;1	UDP-N-acetylhexosamine pyrophosphorylase-like protein 1	Uap1l1	sp|Q3TW96|UAP1L_MOUSE UDP-N-acetylhexosamine pyrophosphorylase-like protein 1 OS=Mus musculus OX=10090 GN=Uap1l1 PE=1 SV=1	2	3	3	3	1	0	1	3	1	0	1	3	1	0	1	3	7.3	7.3	7.3	56.613	507	507;522	2.2		4	1		0.0013643	19.772	2.6	0	2.6	7.3	29054000	5864300	0	6475900	16713000	0	0	0	0
Q3TXS7	Q3TXS7	8	8	8	26S proteasome non-ATPase regulatory subunit 1	Psmd1	sp|Q3TXS7|PSMD1_MOUSE 26S proteasome non-ATPase regulatory subunit 1 OS=Mus musculus OX=10090 GN=Psmd1 PE=1 SV=1	1	8	8	8	0	7	3	4	0	7	3	4	0	7	3	4	9.2	9.2	9.2	105.73	953	953	1	14				0	61.324	0	9.1	4.4	4.4	197200000	0	124270000	28646000	44294000	0	35597000	33561000	32551000
Q3TXX4	Q3TXX4	6	6	6	Vesicular glutamate transporter 1	Slc17a7	sp|Q3TXX4|VGLU1_MOUSE Vesicular glutamate transporter 1 OS=Mus musculus OX=10090 GN=Slc17a7 PE=1 SV=2	1	6	6	6	2	5	4	4	2	5	4	4	2	5	4	4	7.3	7.3	7.3	61.637	560	560	1.38	15	5		1	0	69.8	5.9	7.3	6.1	6.1	1177500000	97919000	346700000	247220000	485690000	392140000	188570000	234810000	292420000
Q3TZZ7	Q3TZZ7	2	2	2	Extended synaptotagmin-2	Esyt2	sp|Q3TZZ7|ESYT2_MOUSE Extended synaptotagmin-2 OS=Mus musculus OX=10090 GN=Esyt2 PE=1 SV=1	1	2	2	2	0	2	0	1	0	2	0	1	0	2	0	1	3.3	3.3	3.3	94.138	845	845	1	3				0.00098668	11.698	0	3.3	0	1.5	17508000	0	13421000	0	4087400	0	0	0	0
Q3U0D9	Q3U0D9	2	2	2	E3 ubiquitin-protein ligase HACE1	Hace1	sp|Q3U0D9|HACE1_MOUSE E3 ubiquitin-protein ligase HACE1 OS=Mus musculus OX=10090 GN=Hace1 PE=1 SV=1	1	2	2	2	1	1	0	0	1	1	0	0	1	1	0	0	2.1	2.1	2.1	102.11	909	909	2.5	1			1	0.0010515	12.349	1.1	1	0	0	8071600	2324500	5747200	0	0	0	0	0	0
Q3U0M1	Q3U0M1	2	2	2	Trafficking protein particle complex subunit 9	Trappc9	sp|Q3U0M1|TPPC9_MOUSE Trafficking protein particle complex subunit 9 OS=Mus musculus OX=10090 GN=Trappc9 PE=1 SV=2	1	2	2	2	0	1	1	2	0	1	1	2	0	1	1	2	1.7	1.7	1.7	128.23	1148	1148	1	4				0.0010288	12.076	0	0.8	0.9	1.7	24525000	0	10413000	2118700	11993000	0	0	0	0
Q3U0V1	Q3U0V1	8	8	8	Far upstream element-binding protein 2	Khsrp	sp|Q3U0V1|FUBP2_MOUSE Far upstream element-binding protein 2 OS=Mus musculus OX=10090 GN=Khsrp PE=1 SV=2	1	8	8	8	1	7	2	4	1	7	2	4	1	7	2	4	13.4	13.4	13.4	76.775	748	748	1.27	12	2	1		0	55.401	1.5	11.1	3.5	5.7	242180000	8190500	146850000	23619000	63515000	0	30183000	0	31100000
Q3U1J4	Q3U1J4	15	15	15	DNA damage-binding protein 1	Ddb1	sp|Q3U1J4|DDB1_MOUSE DNA damage-binding protein 1 OS=Mus musculus OX=10090 GN=Ddb1 PE=1 SV=2	1	15	15	15	1	13	2	7	1	13	2	7	1	13	2	7	13.9	13.9	13.9	126.85	1140	1140	1.2	23		1	1	0	92.329	0.9	12.4	1.8	6	421990000	7262500	290250000	25125000	99346000	0	56170000	17602000	37288000
Q3U1U7	Q3U1U7	1	1	1	Aryl hydrocarbon receptor repressor	Ahrr	sp|Q3U1U7|AHRR_MOUSE Aryl hydrocarbon receptor repressor OS=Mus musculus OX=10090 GN=Ahrr PE=1 SV=1	1	1	1	1	1	0	1	1	1	0	1	1	1	0	1	1	2.9	2.9	2.9	77.725	701	701	2.5		3		1	0.0017707	6.8649	2.9	0	2.9	2.9	2889600000	577250000	0	1639900000	672460000	0	0	0	0
Q3U5Q7	Q3U5Q7	4	4	4	UMP-CMP kinase 2, mitochondrial	Cmpk2	sp|Q3U5Q7|CMPK2_MOUSE UMP-CMP kinase 2, mitochondrial OS=Mus musculus OX=10090 GN=Cmpk2 PE=1 SV=2	1	4	4	4	1	0	2	4	1	0	2	4	1	0	2	4	10.7	10.7	10.7	50.036	447	447	2.29		6		1	0.00076278	24.529	2.2	0	4.5	10.7	68413000	3659300	0	20809000	43945000	0	0	21893000	18072000
Q3UDE2	Q3UDE2	2	2	2	Tubulin--tyrosine ligase-like protein 12	Ttll12	sp|Q3UDE2|TTL12_MOUSE Tubulin--tyrosine ligase-like protein 12 OS=Mus musculus OX=10090 GN=Ttll12 PE=1 SV=1	1	2	2	2	0	0	1	1	0	0	1	1	0	0	1	1	3.4	3.4	3.4	74.042	639	639	2		2			0.0014231	11.388	0	0	1.9	1.6	10303000	0	0	4822300	5480200	0	0	0	0
Q3UFF7	Q3UFF7	2	2	2	Lysophospholipase-like protein 1	Lyplal1	sp|Q3UFF7|LYPL1_MOUSE Lysophospholipase-like protein 1 OS=Mus musculus OX=10090 GN=Lyplal1 PE=1 SV=3	1	2	2	2	0	1	1	0	0	1	1	0	0	1	1	0	10.9	10.9	10.9	26.354	239	239	3			2		0.0014104	11.328	0	5.4	5.4	0	24123000	0	12157000	11967000	0	0	0	0	0
Q3UFY7	Q3UFY7	1	1	1	7-methylguanosine phosphate-specific 5-nucleotidase	Nt5c3b	sp|Q3UFY7|5NT3B_MOUSE 7-methylguanosine phosphate-specific 5-nucleotidase OS=Mus musculus OX=10090 GN=Nt5c3b PE=1 SV=3	1	1	1	1	0	1	1	1	0	1	1	1	0	1	1	1	3	3	3	34.425	300	300	3			3		0.0058651	6.333	0	3	3	3	24112000	0	10002000	9061900	5048200	0	0	0	0
Q3UGR5	Q3UGR5	4	4	4	Haloacid dehalogenase-like hydrolase domain-containing protein 2	Hdhd2	sp|Q3UGR5|HDHD2_MOUSE Haloacid dehalogenase-like hydrolase domain-containing protein 2 OS=Mus musculus OX=10090 GN=Hdhd2 PE=1 SV=2	1	4	4	4	1	4	4	2	1	4	4	2	1	4	4	2	22.4	22.4	22.4	28.73	259	259	3			11		0.00075131	24.209	3.1	22.4	22.4	8.1	347300000	16479000	158980000	115630000	56205000	0	189610000	130950000	159440000
Q3UGX3	Q3UGX3	2	2	2	N-acetylaspartate synthetase	Nat8l	sp|Q3UGX3|NAT8L_MOUSE N-acetylaspartate synthetase OS=Mus musculus OX=10090 GN=Nat8l PE=1 SV=1	1	2	2	2	0	1	1	1	0	1	1	1	0	1	1	1	6.7	6.7	6.7	32.777	299	299	3			3		0.00098522	11.691	0	4	2.7	2.7	13075000	0	5285700	4068400	3720400	0	0	0	0
Q3UGY8	Q3UGY8	2	2	2	Brefeldin A-inhibited guanine nucleotide-exchange protein 3	Arfgef3	sp|Q3UGY8|BIG3_MOUSE Brefeldin A-inhibited guanine nucleotide-exchange protein 3 OS=Mus musculus OX=10090 GN=Arfgef3 PE=1 SV=1	1	2	2	2	0	2	0	0	0	2	0	0	0	2	0	0	1.2	1.2	1.2	240.09	2170	2170	2	1		1		0.0010466	12.307	0	1.2	0	0	8549200	0	8549200	0	0	0	0	0	0
Q3UH60	Q3UH60	7	7	6	Disco-interacting protein 2 homolog B	Dip2b	sp|Q3UH60|DIP2B_MOUSE Disco-interacting protein 2 homolog B OS=Mus musculus OX=10090 GN=Dip2b PE=1 SV=1	1	7	7	6	0	5	0	5	0	5	0	5	0	4	0	4	4.8	4.8	4.3	171.12	1574	1574	1	10				0	44.391	0	3.1	0	3.7	74963000	0	41209000	0	33754000	0	15681000	0	14826000
Q3UH66;Q80UE6	Q3UH66	4;1	4;1	3;0	Serine/threonine-protein kinase WNK2	Wnk2	sp|Q3UH66|WNK2_MOUSE Serine/threonine-protein kinase WNK2 OS=Mus musculus OX=10090 GN=Wnk2 PE=1 SV=2	2	4	4	3	0	4	0	0	0	4	0	0	0	3	0	0	2	2	1.5	227.52	2149	2149;1222	1	4				0.00074794	24.063	0	2	0	0	33152000	0	33152000	0	0	0	0	0	0
Q3UHB1	Q3UHB1	9	9	9	5-nucleotidase domain-containing protein 3	Nt5dc3	sp|Q3UHB1|NT5D3_MOUSE 5-nucleotidase domain-containing protein 3 OS=Mus musculus OX=10090 GN=Nt5dc3 PE=1 SV=1	1	9	9	9	0	0	6	8	0	0	6	8	0	0	6	8	19.6	19.6	19.6	63.17	546	546	2		14			0	55.622	0	0	11.5	17.6	198490000	0	0	68267000	130230000	0	0	32088000	32188000
Q3UHB8	Q3UHB8	2	2	2	Coiled-coil domain-containing protein 177	Ccdc177	sp|Q3UHB8|CC177_MOUSE Coiled-coil domain-containing protein 177 OS=Mus musculus OX=10090 GN=Ccdc177 PE=1 SV=1	1	2	2	2	0	2	1	1	0	2	1	1	0	2	1	1	2.8	2.8	2.8	79.856	706	706	1.2	4	1			0.0010347	12.169	0	2.8	1.1	1.7	45508000	0	27621000	3293300	14593000	0	0	0	0
Q3UHD2	Q3UHD2	2	2	2	Glucose-fructose oxidoreductase domain-containing protein 1	Gfod1	sp|Q3UHD2|GFOD1_MOUSE Glucose-fructose oxidoreductase domain-containing protein 1 OS=Mus musculus OX=10090 GN=Gfod1 PE=1 SV=1	1	2	2	2	0	0	1	2	0	0	1	2	0	0	1	2	5.9	5.9	5.9	43.286	390	390	2		3			0.00096759	11.556	0	0	2.8	5.9	18990000	0	0	4519200	14471000	0	0	0	0
Q3UHD6	Q3UHD6	3	3	3	Sorting nexin-27	Snx27	sp|Q3UHD6|SNX27_MOUSE Sorting nexin-27 OS=Mus musculus OX=10090 GN=Snx27 PE=1 SV=2	1	3	3	3	0	0	2	2	0	0	2	2	0	0	2	2	5	5	5	60.988	539	539	2		4			0.0013063	18.78	0	0	3.2	3.5	49065000	0	0	22232000	26833000	0	0	0	0
Q3UHD9	Q3UHD9	9	9	9	Arf-GAP with GTPase, ANK repeat and PH domain-containing protein 2	Agap2	sp|Q3UHD9|AGAP2_MOUSE Arf-GAP with GTPase, ANK repeat and PH domain-containing protein 2 OS=Mus musculus OX=10090 GN=Agap2 PE=1 SV=1	1	9	9	9	2	9	3	5	2	9	3	5	2	9	3	5	9.5	9.5	9.5	124.51	1186	1186	1.32	17	3	2		0	62.575	2.5	9.5	2.8	5.4	345080000	11918000	184330000	36451000	112390000	20566000	50047000	40217000	47608000
Q3UHE1	Q3UHE1	1	1	1	Membrane-associated phosphatidylinositol transfer protein 3	Pitpnm3	sp|Q3UHE1|PITM3_MOUSE Membrane-associated phosphatidylinositol transfer protein 3 OS=Mus musculus OX=10090 GN=Pitpnm3 PE=1 SV=2	1	1	1	1	0	1	0	1	0	1	0	1	0	1	0	1	1.1	1.1	1.1	106.46	974	974	1	2				0.0017865	7.048	0	1.1	0	1.1	8609700	0	5270100	0	3339600	0	0	0	0
Q3UHH2	Q3UHH2	2	2	2	Solute carrier family 22 member 23	Slc22a23	sp|Q3UHH2|S22AN_MOUSE Solute carrier family 22 member 23 OS=Mus musculus OX=10090 GN=Slc22a23 PE=2 SV=1	1	2	2	2	0	2	0	0	0	2	0	0	0	2	0	0	3.8	3.8	3.8	74.324	689	689	1	2				0.001	11.8	0	3.8	0	0	14988000	0	14988000	0	0	0	0	0	0
Q3UHJ0;Q91Z96	Q3UHJ0	16;1	16;1	16;1	AP2-associated protein kinase 1	Aak1	sp|Q3UHJ0|AAK1_MOUSE AP2-associated protein kinase 1 OS=Mus musculus OX=10090 GN=Aak1 PE=1 SV=2	2	16	16	16	1	14	5	10	1	14	5	10	1	14	5	10	23.1	23.1	23.1	103.35	959	959;1138	1.09	32	1	1		0	139.79	1.3	20.4	7.5	13.2	1440000000	5311900	833650000	131180000	469820000	0	166540000	89877000	127410000
Q3UHL1	Q3UHL1	13	13	13	CaM kinase-like vesicle-associated protein	Camkv	sp|Q3UHL1|CAMKV_MOUSE CaM kinase-like vesicle-associated protein OS=Mus musculus OX=10090 GN=Camkv PE=1 SV=2	1	13	13	13	4	8	10	10	4	8	10	10	4	8	10	10	30.3	30.3	30.3	54.819	512	512	1.95	10	23	8		0	144.29	9	18.9	23.2	23.8	2284200000	170430000	553690000	842360000	717740000	229800000	115030000	265580000	220220000
Q3UHX2	Q3UHX2	3	3	3	28 kDa heat- and acid-stable phosphoprotein	Pdap1	sp|Q3UHX2|HAP28_MOUSE 28 kDa heat- and acid-stable phosphoprotein OS=Mus musculus OX=10090 GN=Pdap1 PE=1 SV=1	1	3	3	3	2	3	1	0	2	3	1	0	2	3	1	0	13.8	13.8	13.8	20.605	181	181	3			6		0	31.49	7.7	13.8	7.2	0	93189000	24639000	49153000	19397000	0	59508000	70535000	0	0
Q3UIU2	Q3UIU2	5	5	5	NADH dehydrogenase [ubiquinone] 1 beta subcomplex subunit 6	Ndufb6	sp|Q3UIU2|NDUB6_MOUSE NADH dehydrogenase [ubiquinone] 1 beta subcomplex subunit 6 OS=Mus musculus OX=10090 GN=Ndufb6 PE=1 SV=3	1	5	5	5	3	5	1	2	3	5	1	2	3	5	1	2	41.4	41.4	41.4	15.515	128	128	4				11	0	122.15	27.3	41.4	7.8	13.3	397180000	102040000	240410000	10023000	44707000	235040000	209790000	0	191880000
Q3UJU9	Q3UJU9	2	2	2	Regulator of microtubule dynamics protein 3	Rmdn3	sp|Q3UJU9|RMD3_MOUSE Regulator of microtubule dynamics protein 3 OS=Mus musculus OX=10090 GN=Rmdn3 PE=1 SV=2	1	2	2	2	0	0	2	2	0	0	2	2	0	0	2	2	5.1	5.1	5.1	52.028	470	470	2		5			0.0011306	13.997	0	0	5.1	5.1	51788000	0	0	24600000	27189000	0	0	21048000	15807000
Q3UKJ7	Q3UKJ7	1	1	1	WD40 repeat-containing protein SMU1;WD40 repeat-containing protein SMU1, N-terminally processed	Smu1	sp|Q3UKJ7|SMU1_MOUSE WD40 repeat-containing protein SMU1 OS=Mus musculus OX=10090 GN=Smu1 PE=2 SV=2	1	1	1	1	0	0	0	1	0	0	0	1	0	0	0	1	1.9	1.9	1.9	57.543	513	513	2		1			0.0042301	6.3678	0	0	0	1.9	5361300	0	0	0	5361300	0	0	0	0
Q3ULJ0	Q3ULJ0	7	6	6	Glycerol-3-phosphate dehydrogenase 1-like protein	Gpd1l	sp|Q3ULJ0|GPD1L_MOUSE Glycerol-3-phosphate dehydrogenase 1-like protein OS=Mus musculus OX=10090 GN=Gpd1l PE=1 SV=2	1	7	6	6	2	3	5	5	2	2	5	5	2	2	5	5	20.5	17.4	17.4	38.225	351	351	2.76		4	13		0	41.529	5.4	8.5	15.1	15.4	375310000	24635000	20866000	193420000	136390000	53489000	47053000	124990000	146150000
Q3UM45	Q3UM45	12	12	12	Protein phosphatase 1 regulatory subunit 7	Ppp1r7	sp|Q3UM45|PP1R7_MOUSE Protein phosphatase 1 regulatory subunit 7 OS=Mus musculus OX=10090 GN=Ppp1r7 PE=1 SV=2	1	12	12	12	3	1	10	11	3	1	10	11	3	1	10	11	39.3	39.3	39.3	41.291	361	361	2.12		29	4		0	104.19	10	3	37.4	38.5	928870000	41604000	15240000	408010000	464010000	80361000	0	118590000	100540000
Q3UMC0;Q9D3R6	Q3UMC0;Q9D3R6	1;1	1;1	1;1	Spermatogenesis-associated protein 5;Katanin p60 ATPase-containing subunit A-like 2	Spata5;Katnal2	sp|Q3UMC0|AFG2H_MOUSE ATPase family protein 2 homolog OS=Mus musculus OX=10090 GN=Spata5 PE=1 SV=2;sp|Q9D3R6|KATL2_MOUSE Katanin p60 ATPase-containing subunit A-like 2 OS=Mus musculus OX=10090 GN=Katnal2 PE=2 SV=2	2	1	1	1	1	1	1	1	1	1	1	1	1	1	1	1	1.3	1.3	1.3	97.255	893	893;539	1.9	4	3	3		0.0011581	15.878	1.3	1.3	1.3	1.3	488860000	62876000	168620000	93030000	164340000	0	0	0	0
Q3UMR5	Q3UMR5	7	7	7	Calcium uniporter protein, mitochondrial	Mcu	sp|Q3UMR5|MCU_MOUSE Calcium uniporter protein, mitochondrial OS=Mus musculus OX=10090 GN=Mcu PE=1 SV=2	1	7	7	7	1	6	4	4	1	6	4	4	1	6	4	4	24.3	24.3	24.3	39.681	350	350	3			16		0	43.961	2.9	21.4	13.4	15.1	368260000	15645000	212420000	61493000	78696000	0	136940000	101510000	111370000
Q3UNH4	Q3UNH4	10	10	10	G protein-regulated inducer of neurite outgrowth 1	Gprin1	sp|Q3UNH4|GRIN1_MOUSE G protein-regulated inducer of neurite outgrowth 1 OS=Mus musculus OX=10090 GN=Gprin1 PE=1 SV=2	1	10	10	10	0	6	4	7	0	6	4	7	0	6	4	7	13.9	13.9	13.9	95.495	932	932	1.26	14	5			0	84.653	0	8.5	5.9	9.7	337460000	0	124740000	59273000	153450000	0	41550000	36991000	45145000
Q3UPL0	Q3UPL0	9	9	9	Protein transport protein Sec31A	Sec31a	sp|Q3UPL0|SC31A_MOUSE Protein transport protein Sec31A OS=Mus musculus OX=10090 GN=Sec31a PE=1 SV=2	1	9	9	9	1	6	0	6	1	6	0	6	1	6	0	6	9.2	9.2	9.2	133.57	1230	1230	1.21	12	1	1		0	54.238	1.1	6	0	5.9	143470000	7875300	76616000	0	58980000	0	22441000	0	17827000
Q3USB7	Q3USB7	1	1	1	Inactive phospholipase C-like protein 1	Plcl1	sp|Q3USB7|PLCL1_MOUSE Inactive phospholipase C-like protein 1 OS=Mus musculus OX=10090 GN=Plcl1 PE=1 SV=3	1	1	1	1	0	1	0	0	0	1	0	0	0	1	0	0	1.3	1.3	1.3	122.67	1096	1096	1	1				0.0026064	6.578	0	1.3	0	0	7531300	0	7531300	0	0	0	0	0	0
Q3UTJ2	Q3UTJ2	8	8	8	Sorbin and SH3 domain-containing protein 2	Sorbs2	sp|Q3UTJ2|SRBS2_MOUSE Sorbin and SH3 domain-containing protein 2 OS=Mus musculus OX=10090 GN=Sorbs2 PE=1 SV=2	1	8	8	8	0	6	3	3	0	6	3	3	0	6	3	3	9.3	9.3	9.3	132.35	1180	1180	1.14	12	2			0	54.456	0	7.2	2.9	3.1	173480000	0	103150000	27094000	43236000	0	30679000	22997000	25855000
Q3UTQ8	Q3UTQ8	4	4	4	Cyclin-dependent kinase-like 5	Cdkl5	sp|Q3UTQ8|CDKL5_MOUSE Cyclin-dependent kinase-like 5 OS=Mus musculus OX=10090 GN=Cdkl5 PE=1 SV=1	1	4	4	4	0	4	0	2	0	4	0	2	0	4	0	2	5.4	5.4	5.4	105.49	938	938	1	6				0.00077101	24.877	0	5.4	0	2.9	50832000	0	35697000	0	15134000	0	10177000	0	11985000
Q3UU96	Q3UU96	3	2	2	Serine/threonine-protein kinase MRCK alpha	Cdc42bpa	sp|Q3UU96|MRCKA_MOUSE Serine/threonine-protein kinase MRCK alpha OS=Mus musculus OX=10090 GN=Cdc42bpa PE=1 SV=2	1	3	2	2	0	3	0	1	0	2	0	0	0	2	0	0	2.2	1.6	1.6	195.53	1719	1719	2.5	1			1	0.0010331	12.135	0	2.2	0	0.6	9144300	0	9144300	0	0	0	0	0	0
Q3UUG6	Q3UUG6	5	5	5	TBC1 domain family member 24	Tbc1d24	sp|Q3UUG6|TBC24_MOUSE TBC1 domain family member 24 OS=Mus musculus OX=10090 GN=Tbc1d24 PE=1 SV=2	1	5	5	5	0	0	3	2	0	0	3	2	0	0	3	2	9.3	9.3	9.3	63.235	561	561	2		5			0	29.116	0	0	5.9	3.4	98777000	0	0	85928000	12849000	0	0	0	0
Q3UUI3	Q3UUI3	4	4	4	Acyl-coenzyme A thioesterase THEM4	Them4	sp|Q3UUI3|THEM4_MOUSE Acyl-coenzyme A thioesterase THEM4 OS=Mus musculus OX=10090 GN=Them4 PE=1 SV=1	1	4	4	4	2	3	3	0	2	3	3	0	2	3	3	0	23	23	23	26.031	230	230	3			9		0	28.873	10.4	15.7	18.3	0	238700000	27293000	114720000	96681000	0	0	0	0	0
Q3UV17	Q3UV17	7	1	1	Keratin, type II cytoskeletal 2 oral	Krt76	sp|Q3UV17|K22O_MOUSE Keratin, type II cytoskeletal 2 oral OS=Mus musculus OX=10090 GN=Krt76 PE=1 SV=1	1	7	1	1	6	7	6	5	1	1	1	1	1	1	1	1	7.4	1.5	1.5	62.844	594	594	2.5	4	4	4	4	0	196.53	5.9	7.4	7.2	5.7	6676000000	482350000	2674800000	2704700000	814030000	0	0	0	0
Q3UV70	Q3UV70	2	2	2	[Pyruvate dehydrogenase [acetyl-transferring]]-phosphatase 1, mitochondrial	Pdp1	sp|Q3UV70|PDP1_MOUSE [Pyruvate dehydrogenase [acetyl-transferring]]-phosphatase 1, mitochondrial OS=Mus musculus OX=10090 GN=Pdp1 PE=1 SV=1	1	2	2	2	0	0	0	2	0	0	0	2	0	0	0	2	4.6	4.6	4.6	61.18	538	538	2		2			0.0014388	11.49	0	0	0	4.6	9718800	0	0	0	9718800	0	0	0	0
Q3UVL4	Q3UVL4	4	4	4	Vacuolar protein sorting-associated protein 51 homolog	Vps51	sp|Q3UVL4|VPS51_MOUSE Vacuolar protein sorting-associated protein 51 homolog OS=Mus musculus OX=10090 GN=Vps51 PE=1 SV=2	1	4	4	4	0	4	2	3	0	4	2	3	0	4	2	3	5.1	5.1	5.1	86.186	782	782	1	9				0.0008244	27.351	0	5.1	2.6	3.7	93111000	0	53121000	12974000	27016000	0	22599000	21997000	20690000
Q3UVX5	Q3UVX5	6	6	6	Metabotropic glutamate receptor 5	Grm5	sp|Q3UVX5|GRM5_MOUSE Metabotropic glutamate receptor 5 OS=Mus musculus OX=10090 GN=Grm5 PE=1 SV=2	1	6	6	6	0	4	1	3	0	4	1	3	0	4	1	3	5.7	5.7	5.7	131.86	1203	1203	1	8				0	36.504	0	3.7	1.2	2.4	89627000	0	54060000	16379000	19188000	0	14561000	0	19547000
Q3UWM4	Q3UWM4	1	1	1	Lysine-specific demethylase 7A	Kdm7a	sp|Q3UWM4|KDM7A_MOUSE Lysine-specific demethylase 7A OS=Mus musculus OX=10090 GN=Kdm7a PE=1 SV=2	1	1	1	1	1	1	0	0	1	1	0	0	1	1	0	0	1	1	1	106.07	940	940	3			2		0.008244	6.2421	1	1	0	0	50914000	13554000	37360000	0	0	0	0	0	0
Q3UX10	Q3UX10	3	1	1	Tubulin alpha chain-like 3	Tubal3	sp|Q3UX10|TBAL3_MOUSE Tubulin alpha chain-like 3 OS=Mus musculus OX=10090 GN=Tubal3 PE=2 SV=2	1	3	1	1	2	2	3	3	0	0	1	1	0	0	1	1	6.3	3.8	3.8	49.988	446	446	2		2			0.0017881	7.0562	2.5	2.5	6.3	6.3	223740000	0	0	58137000	165600000	0	0	0	0
Q3UXZ6	Q3UXZ6	5	5	5	Protein FAM81A	Fam81a	sp|Q3UXZ6|FA81A_MOUSE Protein FAM81A OS=Mus musculus OX=10090 GN=Fam81a PE=1 SV=2	1	5	5	5	0	0	3	3	0	0	3	3	0	0	3	3	16.2	16.2	16.2	41.709	364	364	2		6			0	29.59	0	0	10.4	8	45327000	0	0	26833000	18493000	0	0	0	0
Q3UYC0;Q149T7	Q3UYC0	8;1	8;1	8;1	Protein phosphatase 1H	Ppm1h	sp|Q3UYC0|PPM1H_MOUSE Protein phosphatase 1H OS=Mus musculus OX=10090 GN=Ppm1h PE=1 SV=1	2	8	8	8	0	0	3	6	0	0	3	6	0	0	3	6	21.2	21.2	21.2	56.379	513	513;507	2		9			0	53.696	0	0	9	15.4	160660000	0	0	77280000	83376000	0	0	0	0
Q3UYG8	Q3UYG8	2	2	2	O-acetyl-ADP-ribose deacetylase MACROD2	Macrod2	sp|Q3UYG8|MACD2_MOUSE ADP-ribose glycohydrolase MACROD2 OS=Mus musculus OX=10090 GN=Macrod2 PE=1 SV=1	1	2	2	2	0	1	2	1	0	1	2	1	0	1	2	1	4	4	4	52.144	475	475	1.75	1	3			0.0010406	12.212	0	2.3	4	2.3	33269000	0	6268600	16467000	10534000	0	0	0	0
Q3UZP4	Q3UZP4	1	1	1	Small VCP/p97-interacting protein	Svip	sp|Q3UZP4|SVIP_MOUSE Small VCP/p97-interacting protein OS=Mus musculus OX=10090 GN=Svip PE=3 SV=1	1	1	1	1	1	1	1	1	1	1	1	1	1	1	1	1	14.3	14.3	14.3	8.3635	77	77	4				4	0.0013812	10.435	14.3	14.3	14.3	14.3	97931000	26843000	44061000	12434000	14593000	0	0	0	0
Q3V038	Q3V038	1	1	1	Tetratricopeptide repeat protein 9A	Ttc9	sp|Q3V038|TTC9A_MOUSE Tetratricopeptide repeat protein 9A OS=Mus musculus OX=10090 GN=Ttc9 PE=1 SV=1	1	1	1	1	0	1	0	0	0	1	0	0	0	1	0	0	5.9	5.9	5.9	24.35	219	219	3			1		0.0079002	6.2736	0	5.9	0	0	12615000	0	12615000	0	0	0	0	0	0
Q3V3R1	Q3V3R1	6	6	6	Monofunctional C1-tetrahydrofolate synthase, mitochondrial	Mthfd1l	sp|Q3V3R1|C1TM_MOUSE Monofunctional C1-tetrahydrofolate synthase, mitochondrial OS=Mus musculus OX=10090 GN=Mthfd1l PE=1 SV=2	1	6	6	6	1	5	2	4	1	5	2	4	1	5	2	4	7.4	7.4	7.4	105.73	977	977	1.38	11		1	1	0	35.389	1	6.3	2.3	4.9	130740000	6875200	61939000	13235000	48692000	0	17484000	21443000	19274000
Q3V3V9	Q3V3V9	1	1	1	Leucine-rich repeat-containing protein 16C	Rltpr	sp|Q3V3V9|CARL2_MOUSE Capping protein, Arp2/3 and myosin-I linker protein 2 OS=Mus musculus OX=10090 GN=Carmil2 PE=1 SV=2	1	1	1	1	0	0	1	1	0	0	1	1	0	0	1	1	0.8	0.8	0.8	141.37	1296	1296	2		2			0.0021891	6.7021	0	0	0.8	0.8	13977000	0	0	5860600	8116900	0	0	0	0
Q4ACU6	Q4ACU6	12	11	11	SH3 and multiple ankyrin repeat domains protein 3	Shank3	sp|Q4ACU6|SHAN3_MOUSE SH3 and multiple ankyrin repeat domains protein 3 OS=Mus musculus OX=10090 GN=Shank3 PE=1 SV=3	1	12	11	11	0	12	1	4	0	11	1	3	0	11	1	3	7.9	7.5	7.5	185.39	1730	1730	1	15				0	69.839	0	7.9	0.6	2.2	99503000	0	80271000	4677300	14556000	0	16110000	0	8319600
Q4KMM3	Q4KMM3	27	27	27	Oxidation resistance protein 1	Oxr1	sp|Q4KMM3|OXR1_MOUSE Oxidation resistance protein 1 OS=Mus musculus OX=10090 GN=Oxr1 PE=1 SV=3	1	27	27	27	4	22	12	19	4	22	12	19	4	22	12	19	35.3	35.3	35.3	95.911	866	866	1.22	56	2	6		0	323.31	5.2	29.4	18.6	28.4	2155200000	39665000	963300000	328750000	823520000	42654000	224670000	193450000	247190000
Q4KUS2;Q9Z1N9;Q8K0T7	Q4KUS2;Q9Z1N9	8;5;2	8;5;2	8;5;2	Protein unc-13 homolog A;Protein unc-13 homolog B	Unc13a;Unc13b	sp|Q4KUS2|UN13A_MOUSE Protein unc-13 homolog A OS=Mus musculus OX=10090 GN=Unc13a PE=1 SV=3;sp|Q9Z1N9|UN13B_MOUSE Protein unc-13 homolog B OS=Mus musculus OX=10090 GN=Unc13b PE=1 SV=2	3	8	8	8	0	6	2	4	0	6	2	4	0	6	2	4	4.7	4.7	4.7	193.78	1712	1712;1602;2210	1	12				0	49.279	0	3.7	1.3	2.2	122740000	0	78144000	10616000	33975000	0	21140000	12714000	13930000
Q4QQM4	Q4QQM4	1	1	1	Tumor protein p53-inducible protein 11	Trp53i11	sp|Q4QQM4|P5I11_MOUSE Tumor protein p53-inducible protein 11 OS=Mus musculus OX=10090 GN=Trp53i11 PE=1 SV=1	1	1	1	1	0	1	0	0	0	1	0	0	0	1	0	0	7.9	7.9	7.9	20.91	189	189	4				1	0.003012	6.4726	0	7.9	0	0	16636000	0	16636000	0	0	0	0	0	0
Q4VAE3	Q4VAE3	5	5	5	Transmembrane protein 65	Tmem65	sp|Q4VAE3|TMM65_MOUSE Transmembrane protein 65 OS=Mus musculus OX=10090 GN=Tmem65 PE=1 SV=1	1	5	5	5	4	5	4	3	4	5	4	3	4	5	4	3	24.8	24.8	24.8	24.918	234	234	3.83	1			17	0	42.29	18.8	24.8	19.7	13.7	624280000	104260000	355480000	74865000	89677000	120330000	219940000	152570000	252490000
Q501J6	Q501J6	7	3	3	Probable ATP-dependent RNA helicase DDX17	Ddx17	sp|Q501J6|DDX17_MOUSE Probable ATP-dependent RNA helicase DDX17 OS=Mus musculus OX=10090 GN=Ddx17 PE=1 SV=1	1	7	3	3	1	3	3	5	0	2	0	3	0	2	0	3	10.5	4.3	4.3	72.399	650	650	1.6	2	3			0.0012225	17.675	1.8	4.9	4.9	7.4	49723000	0	19188000	0	30535000	0	11138000	0	14733000
Q505D7	Q505D7	2	2	2	Optic atrophy 3 protein homolog	Opa3	sp|Q505D7|OPA3_MOUSE Optic atrophy 3 protein homolog OS=Mus musculus OX=10090 GN=Opa3 PE=1 SV=1	1	2	2	2	1	1	0	0	1	1	0	0	1	1	0	0	10.6	10.6	10.6	20.11	179	179	3.5			1	1	0.0014255	22.053	3.9	6.7	0	0	50117000	15066000	35050000	0	0	0	0	0	0
Q505F5	Q505F5	5	5	5	Leucine-rich repeat-containing protein 47	Lrrc47	sp|Q505F5|LRC47_MOUSE Leucine-rich repeat-containing protein 47 OS=Mus musculus OX=10090 GN=Lrrc47 PE=1 SV=1	1	5	5	5	0	0	4	4	0	0	4	4	0	0	4	4	10.5	10.5	10.5	63.589	581	581	2		8			0	34.912	0	0	8.1	8.4	93523000	0	0	44948000	48575000	0	0	21379000	23911000
Q52KF3	Q52KF3	2	2	2	Protein spire homolog 1	Spire1	sp|Q52KF3|SPIR1_MOUSE Protein spire homolog 1 OS=Mus musculus OX=10090 GN=Spire1 PE=1 SV=1	1	2	2	2	0	2	0	0	0	2	0	0	0	2	0	0	3.5	3.5	3.5	68.45	598	598	1	2				0.0010638	12.46	0	3.5	0	0	10669000	0	10669000	0	0	0	0	0	0
Q56A07	Q56A07	3	3	3	Sodium channel subunit beta-2	Scn2b	sp|Q56A07|SCN2B_MOUSE Sodium channel subunit beta-2 OS=Mus musculus OX=10090 GN=Scn2b PE=1 SV=1	1	3	3	3	0	1	3	1	0	1	3	1	0	1	3	1	9.8	9.8	9.8	24.227	215	215	2.83		1	5		0	33.354	0	3.7	9.8	6	177710000	0	29676000	110600000	37438000	0	0	0	0
Q58A65	Q58A65	5	5	3	C-Jun-amino-terminal kinase-interacting protein 4	Spag9	sp|Q58A65|JIP4_MOUSE C-Jun-amino-terminal kinase-interacting protein 4 OS=Mus musculus OX=10090 GN=Spag9 PE=1 SV=2	1	5	5	3	1	4	1	2	1	4	1	2	0	2	0	1	4	4	2.6	146.22	1321	1321	1.62	6		1	1	0	31.187	0.8	3.2	0.8	1.6	73725000	16900000	36958000	5361300	14505000	0	0	0	0
Q59J78	Q59J78	2	2	2	Mimitin, mitochondrial	Ndufaf2	sp|Q59J78|NDUF2_MOUSE NADH dehydrogenase [ubiquinone] 1 alpha subcomplex assembly factor 2 OS=Mus musculus OX=10090 GN=Ndufaf2 PE=1 SV=1	1	2	2	2	0	2	0	0	0	2	0	0	0	2	0	0	13.1	13.1	13.1	19.628	168	168	4				2	0.0011136	13.39	0	13.1	0	0	14959000	0	14959000	0	0	0	0	0	0
Q5DQR4	Q5DQR4	6	6	5	Syntaxin-binding protein 5-like	Stxbp5l	sp|Q5DQR4|STB5L_MOUSE Syntaxin-binding protein 5-like OS=Mus musculus OX=10090 GN=Stxbp5l PE=1 SV=1	1	6	6	5	0	5	1	5	0	5	1	5	0	4	1	4	6.6	6.6	5.9	131.84	1185	1185	1	11				0	37.969	0	5.4	1.2	5.6	159260000	0	80665000	16230000	62370000	0	42822000	0	30534000
Q5DTL9	Q5DTL9	13	13	11	Sodium-driven chloride bicarbonate exchanger	Slc4a10	sp|Q5DTL9|S4A10_MOUSE Sodium-driven chloride bicarbonate exchanger OS=Mus musculus OX=10090 GN=Slc4a10 PE=1 SV=2	1	13	13	11	1	12	5	7	1	12	5	7	1	10	4	5	12.3	12.3	10.5	125.82	1118	1118	1.14	26	1		1	0	178.16	1	10.7	5.9	6.6	435030000	7925500	247110000	53656000	126340000	0	46579000	36156000	42408000
Q5DTT2	Q5DTT2	2	2	2	PH and SEC7 domain-containing protein 1	Psd	sp|Q5DTT2|PSD1_MOUSE PH and SEC7 domain-containing protein 1 OS=Mus musculus OX=10090 GN=Psd PE=1 SV=2	1	2	2	2	1	1	1	1	1	1	1	1	1	1	1	1	2.1	2.1	2.1	109.69	1024	1024	2.5		2	2		0.0011331	14.045	0.9	0.9	1.2	0.9	37650000	8022700	5233700	14925000	9468700	0	0	0	0
Q5DTY9	Q5DTY9	4	4	4	BTB/POZ domain-containing protein KCTD16	Kctd16	sp|Q5DTY9|KCD16_MOUSE BTB/POZ domain-containing protein KCTD16 OS=Mus musculus OX=10090 GN=Kctd16 PE=1 SV=2	1	4	4	4	1	0	3	3	1	0	3	3	1	0	3	3	10.1	10.1	10.1	48.972	427	427	2.25		6	2		0.00076046	24.464	2.6	0	8	7.3	127610000	11651000	0	70424000	45531000	0	0	30006000	37277000
Q5DU25	Q5DU25	18	18	14	IQ motif and SEC7 domain-containing protein 2	Iqsec2	sp|Q5DU25|IQEC2_MOUSE IQ motif and SEC7 domain-containing protein 2 OS=Mus musculus OX=10090 GN=Iqsec2 PE=1 SV=3	1	18	18	14	1	14	3	12	1	14	3	12	0	10	1	9	13.9	13.9	11.8	161.78	1478	1478	1.28	26	4	1	1	0	122.72	0.5	9.9	2	9.1	570370000	13025000	337390000	40104000	179850000	0	70177000	24112000	66254000
Q5F285	Q5F285	1	1	1	Transmembrane protein 256	Tmem256	sp|Q5F285|TM256_MOUSE Transmembrane protein 256 OS=Mus musculus OX=10090 GN=Tmem256 PE=1 SV=1	1	1	1	1	0	1	0	0	0	1	0	0	0	1	0	0	7.1	7.1	7.1	11.655	113	113	4				1	0.0017786	6.9507	0	7.1	0	0	7485100	0	7485100	0	0	0	0	0	0
Q5F2E8;Q6ZQ29	Q5F2E8;Q6ZQ29	2;1	2;1	2;1	Serine/threonine-protein kinase TAO1;Serine/threonine-protein kinase TAO2	Taok1;Taok2	sp|Q5F2E8|TAOK1_MOUSE Serine/threonine-protein kinase TAO1 OS=Mus musculus OX=10090 GN=Taok1 PE=1 SV=1;sp|Q6ZQ29|TAOK2_MOUSE Serine/threonine-protein kinase TAO2 OS=Mus musculus OX=10090 GN=Taok2 PE=1 SV=3	2	2	2	2	0	2	0	0	0	2	0	0	0	2	0	0	2.7	2.7	2.7	116.05	1001	1001;1240	1	2				0.0013986	11.214	0	2.7	0	0	19360000	0	19360000	0	0	0	0	0	0
Q5FWK3	Q5FWK3	5	5	5	Rho GTPase-activating protein 1	Arhgap1	sp|Q5FWK3|RHG01_MOUSE Rho GTPase-activating protein 1 OS=Mus musculus OX=10090 GN=Arhgap1 PE=1 SV=1	1	5	5	5	3	1	4	5	3	1	4	5	3	1	4	5	10.3	10.3	10.3	50.41	439	439	2.25		12	4		0	149.6	6.8	1.8	10	10.3	547410000	66681000	10655000	250580000	219490000	93052000	0	102560000	88788000
Q5H8C4	Q5H8C4	5	5	5	Vacuolar protein sorting-associated protein 13A	Vps13a	sp|Q5H8C4|VP13A_MOUSE Vacuolar protein sorting-associated protein 13A OS=Mus musculus OX=10090 GN=Vps13a PE=1 SV=1	1	5	5	5	0	4	0	3	0	4	0	3	0	4	0	3	2	2	2	359.4	3166	3166	1	7				0	28.898	0	1.5	0	1.3	59998000	0	37758000	0	22240000	0	13662000	0	14961000
Q5HZI2	Q5HZI2	2	2	2	C2 calcium-dependent domain-containing protein 4C	C2cd4cC2CD4 family	sp|Q5HZI2|C2C4C_MOUSE C2 calcium-dependent domain-containing protein 4C OS=Mus musculus OX=10090 GN=C2cd4c PE=1 SV=1	1	2	2	2	0	0	1	2	0	0	1	2	0	0	1	2	6.9	6.9	6.9	44.614	419	419	2		3			0.0010199	12	0	0	2.6	6.9	31522000	0	0	15046000	16475000	0	0	0	0
Q5HZI9	Q5HZI9	3	3	3	Solute carrier family 25 member 51	Slc25a51	sp|Q5HZI9|S2551_MOUSE Mitochondrial nicotinamide adenine dinucleotide transporter SLC25A51 OS=Mus musculus OX=10090 GN=Slc25a51 PE=1 SV=1	1	3	3	3	0	2	1	1	0	2	1	1	0	2	1	1	12.8	12.8	12.8	33.689	298	298	3			4		0.0013038	18.767	0	6.4	6.4	3.7	17961000	0	8713900	7106400	2140500	0	0	0	0
Q5IRJ6	Q5IRJ6	1	1	1	Zinc transporter 9	Slc30a9	sp|Q5IRJ6|ZNT9_MOUSE Zinc transporter 9 OS=Mus musculus OX=10090 GN=Slc30a9 PE=1 SV=2	1	1	1	1	0	0	1	1	0	0	1	1	0	0	1	1	2.1	2.1	2.1	62.875	567	567	2		2			0.0058553	6.3295	0	0	2.1	2.1	6307100	0	0	6307100	0	0	0	0	0
Q5M8N0	Q5M8N0	4	4	4	CB1 cannabinoid receptor-interacting protein 1	Cnrip1	sp|Q5M8N0|CNRP1_MOUSE CB1 cannabinoid receptor-interacting protein 1 OS=Mus musculus OX=10090 GN=Cnrip1 PE=1 SV=1	1	4	4	4	3	4	2	4	3	4	2	4	3	4	2	4	26.2	26.2	26.2	18.612	164	164	3.67			7	14	0	33.249	21.3	26.2	14.6	26.2	2094500000	607090000	960490000	255750000	271120000	677000000	506560000	1606100000	711130000
Q5M8N4	Q5M8N4	3	3	3	Epimerase family protein SDR39U1	Sdr39u1	sp|Q5M8N4|D39U1_MOUSE Epimerase family protein SDR39U1 OS=Mus musculus OX=10090 GN=Sdr39u1 PE=1 SV=2	1	3	3	3	2	2	3	2	2	2	3	2	2	2	3	2	12.3	12.3	12.3	31.458	293	293	3			9		0.0012821	18.316	7.8	7.8	12.3	7.8	147360000	33824000	51612000	37511000	24416000	71859000	69996000	53034000	64473000
Q5NCF2	Q5NCF2	3	3	3	Trafficking protein particle complex subunit 1	Trappc1	sp|Q5NCF2|TPPC1_MOUSE Trafficking protein particle complex subunit 1 OS=Mus musculus OX=10090 GN=Trappc1 PE=1 SV=1	1	3	3	3	1	3	1	0	1	3	1	0	1	3	1	0	23.4	23.4	23.4	16.881	145	145	4				5	0.0012945	18.612	6.9	23.4	6.9	0	41888000	6206000	32632000	3050500	0	0	0	0	0
Q5PR73	Q5PR73	8	8	8	GTP-binding protein Di-Ras2	Diras2	sp|Q5PR73|DIRA2_MOUSE GTP-binding protein Di-Ras2 OS=Mus musculus OX=10090 GN=Diras2 PE=1 SV=1	1	8	8	8	6	7	6	4	6	7	6	4	6	7	6	4	41.7	41.7	41.7	22.498	199	199	3.04			25	1	0	79.441	34.2	35.2	34.7	21.6	1924500000	304770000	890720000	527850000	201150000	459260000	675440000	428430000	411110000
Q5RJI5	Q5RJI5	3	3	3	Serine/threonine-protein kinase BRSK1	Brsk1	sp|Q5RJI5|BRSK1_MOUSE Serine/threonine-protein kinase BRSK1 OS=Mus musculus OX=10090 GN=Brsk1 PE=1 SV=1	1	3	3	3	1	1	0	3	1	1	0	3	1	1	0	3	4.5	4.5	4.5	85.154	778	778	1.4	4		1		0.0012247	17.68	1.5	1.5	0	4.5	30601000	6845300	9343100	0	14412000	0	0	0	0
Q5SQX6	Q5SQX6	31	31	21	Cytoplasmic FMR1-interacting protein 2	Cyfip2	sp|Q5SQX6|CYFP2_MOUSE Cytoplasmic FMR1-interacting protein 2 OS=Mus musculus OX=10090 GN=Cyfip2 PE=1 SV=2	1	31	31	21	11	28	12	22	11	28	12	22	6	19	6	14	24.5	24.5	16.1	145.66	1253	1253	1.58	70	25	16	3	0	321.19	9	22.3	9.8	17.8	3222800000	404530000	1405200000	528940000	884130000	196980000	221430000	199050000	167240000
Q5SRX1	Q5SRX1	7	7	7	TOM1-like protein 2	Tom1l2	sp|Q5SRX1|TM1L2_MOUSE TOM1-like protein 2 OS=Mus musculus OX=10090 GN=Tom1l2 PE=1 SV=1	1	7	7	7	0	0	4	6	0	0	4	6	0	0	4	6	20.5	20.5	20.5	55.662	507	507	2		12			0	53.765	0	0	9.5	18.5	418670000	0	0	125210000	293460000	0	0	94656000	142800000
Q5SSL4	Q5SSL4	5	5	4	Active breakpoint cluster region-related protein	Abr	sp|Q5SSL4|ABR_MOUSE Active breakpoint cluster region-related protein OS=Mus musculus OX=10090 GN=Abr PE=1 SV=1	1	5	5	4	0	3	3	5	0	3	3	5	0	3	2	4	6.1	6.1	4.9	97.666	859	859	1	11				0	41.401	0	3.8	3.3	6.1	227420000	0	95653000	36282000	95488000	0	46680000	44410000	48537000
Q5SUR0	Q5SUR0	2	2	2	Phosphoribosylformylglycinamidine synthase	Pfas	sp|Q5SUR0|PUR4_MOUSE Phosphoribosylformylglycinamidine synthase OS=Mus musculus OX=10090 GN=Pfas PE=1 SV=1	1	2	2	2	0	1	0	1	0	1	0	1	0	1	0	1	1.7	1.7	1.7	144.63	1337	1337	1	2				0.00097182	11.575	0	0.8	0	0.9	15705000	0	6786900	0	8917800	0	0	0	0
Q5SVL6	Q5SVL6	6	5	5	Rap1 GTPase-activating protein 2	Rap1gap2	sp|Q5SVL6|RPGP2_MOUSE Rap1 GTPase-activating protein 2 OS=Mus musculus OX=10090 GN=Rap1gap2 PE=1 SV=1	1	6	5	5	0	5	0	2	0	4	0	2	0	4	0	2	9.4	8.4	8.4	78.253	712	712	1.17	5	1			0	31.012	0	8.3	0	2.5	95852000	0	88124000	0	7728500	0	0	0	0
Q5SXY1	Q5SXY1	3	3	3	Cytospin-B	Specc1	sp|Q5SXY1|CYTSB_MOUSE Cytospin-B OS=Mus musculus OX=10090 GN=Specc1 PE=1 SV=2	1	3	3	3	0	1	0	3	0	1	0	3	0	1	0	3	2.6	2.6	2.6	118.1	1067	1067	1	4				0.001182	17.106	0	0.7	0	2.6	18527000	0	8813100	0	9713800	0	0	0	0
Q5SYD0	Q5SYD0	2	2	2	Unconventional myosin-Id	Myo1d	sp|Q5SYD0|MYO1D_MOUSE Unconventional myosin-Id OS=Mus musculus OX=10090 GN=Myo1d PE=1 SV=1	1	2	2	2	0	2	0	0	0	2	0	0	0	2	0	0	2.1	2.1	2.1	116.08	1006	1006	1	2				0.00098039	11.635	0	2.1	0	0	7650300	0	7650300	0	0	0	0	0	0
Q5SYH2	Q5SYH2	1	1	1	Transmembrane protein 199	Tmem199	sp|Q5SYH2|TM199_MOUSE Transmembrane protein 199 OS=Mus musculus OX=10090 GN=Tmem199 PE=1 SV=1	1	1	1	1	0	1	0	0	0	1	0	0	0	1	0	0	4.3	4.3	4.3	23.099	208	208	4				1	0.0013435	7.1372	0	4.3	0	0	2147600	0	2147600	0	0	0	0	0	0
Q5U458	Q5U458	5	5	5	DnaJ homolog subfamily C member 11	Dnajc11	sp|Q5U458|DJC11_MOUSE DnaJ homolog subfamily C member 11 OS=Mus musculus OX=10090 GN=Dnajc11 PE=1 SV=2	1	5	5	5	1	0	2	5	1	0	2	5	1	0	2	5	11.3	11.3	11.3	63.232	559	559	2		8			0	29.351	2.1	0	3.6	11.3	70553000	3045700	0	13841000	53666000	0	0	16875000	20166000
Q5XG69	Q5XG69	2	2	2	Soluble lamin-associated protein of 75 kDa	Fam169a	sp|Q5XG69|F169A_MOUSE Soluble lamin-associated protein of 75 kDa OS=Mus musculus OX=10090 GN=Fam169a PE=1 SV=3	1	2	2	2	0	2	1	1	0	2	1	1	0	2	1	1	3.8	3.8	3.8	73.239	665	665	1	4				0.00099701	11.773	0	3.8	1.2	1.2	47700000	0	31601000	5045800	11053000	0	0	0	0
Q5XJY5	Q5XJY5	4	4	4	Coatomer subunit delta	Arcn1	sp|Q5XJY5|COPD_MOUSE Coatomer subunit delta OS=Mus musculus OX=10090 GN=Arcn1 PE=1 SV=2	1	4	4	4	0	0	1	4	0	0	1	4	0	0	1	4	8.2	8.2	8.2	57.229	511	511	2		5			0.00079051	25.531	0	0	1.8	8.2	62884000	0	0	9111800	53772000	0	0	0	0
Q60597	Q60597	18	18	18	2-oxoglutarate dehydrogenase, mitochondrial	Ogdh	sp|Q60597|ODO1_MOUSE 2-oxoglutarate dehydrogenase, mitochondrial OS=Mus musculus OX=10090 GN=Ogdh PE=1 SV=3	1	18	18	18	4	15	9	12	4	15	9	12	4	15	9	12	19.4	19.4	19.4	116.45	1023	1023	1.65	35	16	9	2	0	323.31	5.3	15.5	9.9	13.4	2598500000	361570000	977980000	421630000	837300000	255730000	183420000	149790000	178910000
Q60598	Q60598	8	8	8	Src substrate cortactin	Cttn	sp|Q60598|SRC8_MOUSE Src substrate cortactin OS=Mus musculus OX=10090 GN=Cttn PE=1 SV=2	1	8	8	8	0	5	5	3	0	5	5	3	0	5	5	3	16.1	16.1	16.1	61.249	546	546	1.57	6	8			0	64.63	0	10.4	9.9	6	354380000	0	138490000	130720000	85182000	0	48247000	57617000	47550000
Q60605;Q8CI43	Q60605	3;1	3;1	3;1	Myosin light polypeptide 6	Myl6	sp|Q60605|MYL6_MOUSE Myosin light polypeptide 6 OS=Mus musculus OX=10090 GN=Myl6 PE=1 SV=3	2	3	3	3	3	3	2	2	3	3	2	2	3	3	2	2	19.9	19.9	19.9	16.93	151	151;207	3.91			1	10	0.00072046	22.948	19.9	19.9	11.3	11.3	694340000	180110000	420940000	45275000	48015000	230530000	332180000	261850000	299800000
Q60625	Q60625	5	5	5	Intercellular adhesion molecule 5	Icam5	sp|Q60625|ICAM5_MOUSE Intercellular adhesion molecule 5 OS=Mus musculus OX=10090 GN=Icam5 PE=1 SV=2	1	5	5	5	1	4	3	4	1	4	3	4	1	4	3	4	6.2	6.2	6.2	96.944	917	917	1.27	12	2	1		0	42.798	1	5.2	3.9	4.8	304490000	8011000	55323000	107190000	133970000	0	81453000	94657000	74737000
Q60631	Q60631	8	8	8	Growth factor receptor-bound protein 2	Grb2	sp|Q60631|GRB2_MOUSE Growth factor receptor-bound protein 2 OS=Mus musculus OX=10090 GN=Grb2 PE=1 SV=1	1	8	8	8	3	4	5	2	3	4	5	2	3	4	5	2	32.7	32.7	32.7	25.238	217	217	3			14		0	67.092	16.6	18.4	21.2	9.2	469260000	85502000	102400000	243060000	38299000	0	91200000	296090000	100000000
Q60634	Q60634	17	17	17	Flotillin-2	Flot2	sp|Q60634|FLOT2_MOUSE Flotillin-2 OS=Mus musculus OX=10090 GN=Flot2 PE=1 SV=2	1	17	17	17	0	1	14	14	0	1	14	14	0	1	14	14	47	47	47	47.037	428	428	2		33			0	119.91	0	2.6	40.2	36.9	677680000	0	4030800	414430000	259220000	0	0	92263000	79094000
Q60668	Q60668	2	1	1	Heterogeneous nuclear ribonucleoprotein D0	Hnrnpd	sp|Q60668|HNRPD_MOUSE Heterogeneous nuclear ribonucleoprotein D0 OS=Mus musculus OX=10090 GN=Hnrnpd PE=1 SV=2	1	2	1	1	1	1	2	1	0	1	1	0	0	1	1	0	6.2	3.9	3.9	38.354	355	355	2.5		1	1		0.0042337	6.3698	2.3	3.9	6.2	2.3	185220000	0	43128000	142090000	0	0	0	0	0
Q60676	Q60676	6	6	6	Serine/threonine-protein phosphatase 5	Ppp5c	sp|Q60676|PPP5_MOUSE Serine/threonine-protein phosphatase 5 OS=Mus musculus OX=10090 GN=Ppp5c PE=1 SV=3	1	6	6	6	1	0	2	6	1	0	2	6	1	0	2	6	16	16	16	56.876	499	499	2.1		9	1		0	40.632	2.2	0	4.8	16	279830000	5214400	0	86394000	188220000	0	0	82696000	82670000
Q60692	Q60692	4	4	4	Proteasome subunit beta type-6	Psmb6	sp|Q60692|PSB6_MOUSE Proteasome subunit beta type-6 OS=Mus musculus OX=10090 GN=Psmb6 PE=1 SV=3	1	4	4	4	2	4	2	1	2	4	2	1	2	4	2	1	16.8	16.8	16.8	25.378	238	238	3.33			6	3	0	35.726	8.8	16.8	8.8	4.2	349140000	61457000	198970000	82243000	6470700	162000000	205870000	284490000	0
Q60737	Q60737	7	7	7	Casein kinase II subunit alpha	Csnk2a1	sp|Q60737|CSK21_MOUSE Casein kinase II subunit alpha OS=Mus musculus OX=10090 GN=Csnk2a1 PE=1 SV=2	1	7	7	7	3	0	5	7	3	0	5	7	3	0	5	7	22	22	22	45.133	391	391	2.19		13	3		0	93.266	12.8	0	17.9	22	466000000	84107000	0	124200000	257690000	162600000	0	96643000	95281000
Q60738	Q60738	1	1	1	Zinc transporter 1	Slc30a1	sp|Q60738|ZNT1_MOUSE Zinc transporter 1 OS=Mus musculus OX=10090 GN=Slc30a1 PE=1 SV=1	1	1	1	1	1	1	0	0	1	1	0	0	1	1	0	0	2.4	2.4	2.4	54.716	503	503	2	1		1		0.0013465	7.2495	2.4	2.4	0	0	14272000	4223900	10048000	0	0	0	0	0	0
Q60749	Q60749	2	2	2	KH domain-containing, RNA-binding, signal transduction-associated protein 1	Khdrbs1	sp|Q60749|KHDR1_MOUSE KH domain-containing, RNA-binding, signal transduction-associated protein 1 OS=Mus musculus OX=10090 GN=Khdrbs1 PE=1 SV=2	1	2	2	2	0	0	2	1	0	0	2	1	0	0	2	1	5.4	5.4	5.4	48.37	443	443	2		3			0.0010776	12.695	0	0	5.4	3.2	91972000	0	0	62966000	29007000	0	0	0	0
Q60771	Q60771	1	1	1	Claudin-11	Cldn11	sp|Q60771|CLD11_MOUSE Claudin-11 OS=Mus musculus OX=10090 GN=Cldn11 PE=1 SV=1	1	1	1	1	1	1	1	1	1	1	1	1	1	1	1	1	6.8	6.8	6.8	22.114	207	207	2.31	5	2	3	3	0	323.31	6.8	6.8	6.8	6.8	1893700000	164610000	346610000	369920000	1012600000	0	0	965090000	930090000
Q60780	Q60780	2	2	2	Growth arrest-specific protein 7	Gas7	sp|Q60780|GAS7_MOUSE Growth arrest-specific protein 7 OS=Mus musculus OX=10090 GN=Gas7 PE=1 SV=1	1	2	2	2	0	0	1	2	0	0	1	2	0	0	1	2	5.7	5.7	5.7	48.173	421	421	2		3			0.0011261	13.704	0	0	2.6	5.7	42110000	0	0	15650000	26460000	0	0	0	0
Q60829	Q60829	1	1	1	Protein phosphatase 1 regulatory subunit 1B	Ppp1r1b	sp|Q60829|PPR1B_MOUSE Protein phosphatase 1 regulatory subunit 1B OS=Mus musculus OX=10090 GN=Ppp1r1b PE=1 SV=2	1	1	1	1	0	1	0	0	0	1	0	0	0	1	0	0	8.2	8.2	8.2	21.78	194	194	3			1		0.0013819	10.728	0	8.2	0	0	43027000	0	43027000	0	0	0	0	0	0
Q60854	Q60854	3	3	3	Serpin B6	Serpinb6	sp|Q60854|SPB6_MOUSE Serpin B6 OS=Mus musculus OX=10090 GN=Serpinb6 PE=1 SV=1	1	3	3	3	0	0	1	3	0	0	1	3	0	0	1	3	7.4	7.4	7.4	42.598	378	378	2		4			0.0011912	17.244	0	0	2.1	7.4	45505000	0	0	10582000	34922000	0	0	0	0
Q60864	Q60864	13	13	13	Stress-induced-phosphoprotein 1	Stip1	sp|Q60864|STIP1_MOUSE Stress-induced-phosphoprotein 1 OS=Mus musculus OX=10090 GN=Stip1 PE=1 SV=1	1	13	13	13	6	2	10	11	6	2	10	11	6	2	10	11	23.4	23.4	23.4	62.581	543	543	2.26		30	6	2	0	94.19	11	1.8	16.9	19.7	1397400000	144610000	9712500	629380000	613720000	126240000	42678000	290590000	295650000
Q60865	Q60865	2	2	2	Caprin-1	Caprin1	sp|Q60865|CAPR1_MOUSE Caprin-1 OS=Mus musculus OX=10090 GN=Caprin1 PE=1 SV=2	1	2	2	2	0	2	0	1	0	2	0	1	0	2	0	1	3.3	3.3	3.3	78.168	707	707	1	3				0.0011211	13.589	0	3.3	0	1.7	72025000	0	42012000	0	30013000	0	0	0	0
Q60875	Q60875	11	11	11	Rho guanine nucleotide exchange factor 2	Arhgef2	sp|Q60875|ARHG2_MOUSE Rho guanine nucleotide exchange factor 2 OS=Mus musculus OX=10090 GN=Arhgef2 PE=1 SV=4	1	11	11	11	0	11	0	3	0	11	0	3	0	11	0	3	11.4	11.4	11.4	111.97	985	985	1	14				0	71.375	0	11.4	0	3.4	198920000	0	168480000	0	30435000	0	34106000	0	29707000
Q60902	Q60902	8	8	8	Epidermal growth factor receptor substrate 15-like 1	Eps15l1	sp|Q60902|EP15R_MOUSE Epidermal growth factor receptor substrate 15-like 1 OS=Mus musculus OX=10090 GN=Eps15l1 PE=1 SV=3	1	8	8	8	0	7	2	3	0	7	2	3	0	7	2	3	10.4	10.4	10.4	99.307	907	907	1.23	10	3			0	49.943	0	9.5	1.8	3.2	151300000	0	91571000	9472500	50254000	0	16882000	10823000	27978000
Q60930	Q60930	9	9	9	Voltage-dependent anion-selective channel protein 2	Vdac2	sp|Q60930|VDAC2_MOUSE Voltage-dependent anion-selective channel protein 2 OS=Mus musculus OX=10090 GN=Vdac2 PE=1 SV=2	1	9	9	9	7	9	9	7	7	9	9	7	7	9	9	7	35.3	35.3	35.3	31.732	295	295	2.59	11	18	35	10	0	323.31	24.4	35.3	35.3	24.4	12622000000	2036600000	5014000000	3628600000	1943100000	1375100000	3206100000	2490200000	2917900000
Q60931	Q60931	9	9	9	Voltage-dependent anion-selective channel protein 3	Vdac3	sp|Q60931|VDAC3_MOUSE Voltage-dependent anion-selective channel protein 3 OS=Mus musculus OX=10090 GN=Vdac3 PE=1 SV=1	1	9	9	9	2	9	7	7	2	9	7	7	2	9	7	7	41.7	41.7	41.7	30.752	283	283	2.65	8	4	30	4	0	230.98	8.5	41.7	32.5	27.6	9461800000	856960000	3930900000	2839400000	1834600000	1749500000	3734900000	2452100000	3044500000
Q60932	Q60932	14	14	14	Voltage-dependent anion-selective channel protein 1	Vdac1	sp|Q60932|VDAC1_MOUSE Voltage-dependent anion-selective channel protein 1 OS=Mus musculus OX=10090 GN=Vdac1 PE=1 SV=3	1	14	14	14	12	13	11	13	12	13	11	13	12	13	11	13	55.4	55.4	55.4	32.351	296	296	2.75	15	19	74	18	0	323.31	47	49	48.3	54.7	50433000000	7045600000	18295000000	15490000000	9602200000	4690600000	8184300000	6956500000	8519600000
Q60972;Q60973	Q60972;Q60973	3;2	3;2	3;2	Histone-binding protein RBBP4;Histone-binding protein RBBP7	Rbbp4;Rbbp7	sp|Q60972|RBBP4_MOUSE Histone-binding protein RBBP4 OS=Mus musculus OX=10090 GN=Rbbp4 PE=1 SV=5;sp|Q60973|RBBP7_MOUSE Histone-binding protein RBBP7 OS=Mus musculus OX=10090 GN=Rbbp7 PE=1 SV=1	2	3	3	3	0	0	1	3	0	0	1	3	0	0	1	3	7.8	7.8	7.8	47.655	425	425;425	2		4			0.0012642	18.055	0	0	1.9	7.8	60599000	0	0	9268700	51330000	0	0	0	0
Q60996	Q60996	2	2	2	Serine/threonine-protein phosphatase 2A 56 kDa regulatory subunit gamma isoform	Ppp2r5c	sp|Q60996|2A5G_MOUSE Serine/threonine-protein phosphatase 2A 56 kDa regulatory subunit gamma isoform OS=Mus musculus OX=10090 GN=Ppp2r5c PE=1 SV=2	1	2	2	2	0	0	2	2	0	0	2	2	0	0	2	2	4.6	4.6	4.6	60.824	524	524	2		4			0.0010428	12.264	0	0	4.6	4.6	97410000	0	0	42840000	54570000	0	0	44579000	52797000
Q61016	Q61016	1	1	1	Guanine nucleotide-binding protein G(I)/G(S)/G(O) subunit gamma-7	Gng7	sp|Q61016|GBG7_MOUSE Guanine nucleotide-binding protein G(I)/G(S)/G(O) subunit gamma-7 OS=Mus musculus OX=10090 GN=Gng7 PE=1 SV=2	1	1	1	1	1	1	0	0	1	1	0	0	1	1	0	0	23.5	23.5	23.5	7.4796	68	68	4				2	0.0026053	6.5671	23.5	23.5	0	0	43825000	34345000	9480300	0	0	0	0	0	0
Q61024	Q61024	3	3	3	Asparagine synthetase [glutamine-hydrolyzing]	Asns	sp|Q61024|ASNS_MOUSE Asparagine synthetase [glutamine-hydrolyzing] OS=Mus musculus OX=10090 GN=Asns PE=1 SV=3	1	3	3	3	0	0	1	3	0	0	1	3	0	0	1	3	5	5	5	64.282	561	561	2		4			0.0012626	18.034	0	0	1.6	5	40658000	0	0	10467000	30191000	0	0	0	0
Q61029;Q61033	Q61029;Q61033	4;3	4;3	4;3	Lamina-associated polypeptide 2, isoforms beta/delta/epsilon/gamma;Lamina-associated polypeptide 2, isoforms alpha/zeta	Tmpo	sp|Q61029|LAP2B_MOUSE Lamina-associated polypeptide 2, isoforms beta/delta/epsilon/gamma OS=Mus musculus OX=10090 GN=Tmpo PE=1 SV=4;sp|Q61033|LAP2A_MOUSE Lamina-associated polypeptide 2, isoforms alpha/zeta OS=Mus musculus OX=10090 GN=Tmpo PE=1 SV=4	2	4	4	4	0	0	2	4	0	0	2	4	0	0	2	4	14.2	14.2	14.2	50.372	452	452;693	2		6			0.00078864	25.448	0	0	8.6	14.2	112160000	0	0	39298000	72865000	0	0	0	0
Q61035;Q99KK9	Q61035	8;3	8;3	8;3	Histidine--tRNA ligase, cytoplasmic	Hars	sp|Q61035|HARS1_MOUSE Histidine--tRNA ligase, cytoplasmic OS=Mus musculus OX=10090 GN=Hars1 PE=1 SV=2	2	8	8	8	0	0	7	7	0	0	7	7	0	0	7	7	15.3	15.3	15.3	57.432	509	509;505	2		14			0	47.126	0	0	13.4	13.6	163570000	0	0	75969000	87597000	0	0	24706000	23453000
Q61036	Q61036	7	2	0	Serine/threonine-protein kinase PAK 3	Pak3	sp|Q61036|PAK3_MOUSE Serine/threonine-protein kinase PAK 3 OS=Mus musculus OX=10090 GN=Pak3 PE=1 SV=2	1	7	2	0	1	1	5	6	1	0	2	2	0	0	0	0	11.3	3.6	0	62.397	559	559	2.2		4	1		0.0010899	12.959	2	2.1	8.8	11.3	48250000	4976000	0	21116000	22158000	0	0	15215000	14282000
Q61037	Q61037	2	2	2	Tuberin	Tsc2	sp|Q61037|TSC2_MOUSE Tuberin OS=Mus musculus OX=10090 GN=Tsc2 PE=1 SV=1	1	2	2	2	0	2	0	0	0	2	0	0	0	2	0	0	1.3	1.3	1.3	202.07	1814	1814	1	2				0.0013947	11.157	0	1.3	0	0	11119000	0	11119000	0	0	0	0	0	0
Q61074	Q61074	1	1	1	Protein phosphatase 1G	Ppm1g	sp|Q61074|PPM1G_MOUSE Protein phosphatase 1G OS=Mus musculus OX=10090 GN=Ppm1g PE=1 SV=3	1	1	1	1	0	1	0	0	0	1	0	0	0	1	0	0	2.2	2.2	2.2	58.727	542	542	1	1				0.0013429	7.111	0	2.2	0	0	9381000	0	9381000	0	0	0	0	0	0
Q61081	Q61081	3	3	3	Hsp90 co-chaperone Cdc37;Hsp90 co-chaperone Cdc37, N-terminally processed	Cdc37	sp|Q61081|CDC37_MOUSE Hsp90 co-chaperone Cdc37 OS=Mus musculus OX=10090 GN=Cdc37 PE=1 SV=1	1	3	3	3	0	0	2	1	0	0	2	1	0	0	2	1	9.8	9.8	9.8	44.593	379	379	2		3			0.001173	16.932	0	0	7.4	2.4	33408000	0	0	27203000	6205000	0	0	0	0
Q61102	Q61102	3	3	3	ATP-binding cassette sub-family B member 7, mitochondrial	Abcb7	sp|Q61102|ABCB7_MOUSE Iron-sulfur clusters transporter ABCB7, mitochondrial OS=Mus musculus OX=10090 GN=Abcb7 PE=1 SV=3	1	3	3	3	0	1	1	3	0	1	1	3	0	1	1	3	4.3	4.3	4.3	82.58	752	752	1.8	1	4			0.0013115	18.828	0	1.3	1.3	4.3	33892000	0	8145700	4566600	21179000	0	0	0	0
Q61137	Q61137	3	3	3	Astrotactin-1	Astn1	sp|Q61137|ASTN1_MOUSE Astrotactin-1 OS=Mus musculus OX=10090 GN=Astn1 PE=1 SV=4	1	3	3	3	1	2	1	3	1	2	1	3	1	2	1	3	2.8	2.8	2.8	144.88	1302	1302	2	2	3	2		0.0013717	19.933	1	1.8	0.8	2.8	59714000	7502300	15531000	9338500	27342000	0	12962000	0	15619000
Q61151	Q61151	4	2	2	Serine/threonine-protein phosphatase 2A 56 kDa regulatory subunit epsilon isoform	Ppp2r5e	sp|Q61151|2A5E_MOUSE Serine/threonine-protein phosphatase 2A 56 kDa regulatory subunit epsilon isoform OS=Mus musculus OX=10090 GN=Ppp2r5e PE=1 SV=3	1	4	2	2	0	1	3	2	0	1	1	1	0	1	1	1	6.6	4.7	4.7	54.713	467	467	2		3			0.00098377	11.671	0	2.8	4.7	3.9	63935000	0	6745400	47529000	9660200	0	0	0	0
Q61166	Q61166	8	6	6	Microtubule-associated protein RP/EB family member 1	Mapre1	sp|Q61166|MARE1_MOUSE Microtubule-associated protein RP/EB family member 1 OS=Mus musculus OX=10090 GN=Mapre1 PE=1 SV=3	1	8	6	6	2	7	2	2	1	5	1	1	1	5	1	1	28.4	28	28	30.016	268	268	3			8		0	49.412	7.1	24.6	6.3	10.1	243880000	21889000	177500000	23843000	20652000	0	0	0	0
Q61171	Q61171	7	7	7	Peroxiredoxin-2	Prdx2	sp|Q61171|PRDX2_MOUSE Peroxiredoxin-2 OS=Mus musculus OX=10090 GN=Prdx2 PE=1 SV=3	1	7	7	7	7	7	6	6	7	7	6	6	7	7	6	6	35.9	35.9	35.9	21.778	198	198	3.28	2		27	17	0	323.31	35.9	35.9	27.8	27.8	4714600000	1215800000	2445800000	577350000	475660000	851440000	1298800000	640820000	899460000
Q61187	Q61187	2	2	2	Tumor susceptibility gene 101 protein	Tsg101	sp|Q61187|TS101_MOUSE Tumor susceptibility gene 101 protein OS=Mus musculus OX=10090 GN=Tsg101 PE=1 SV=2	1	2	2	2	0	0	2	1	0	0	2	1	0	0	2	1	5.6	5.6	5.6	44.123	391	391	2		3			0.0011338	14.05	0	0	5.6	3.1	51191000	0	0	26000000	25191000	0	0	0	0
Q61205	Q61205	2	2	2	Platelet-activating factor acetylhydrolase IB subunit gamma	Pafah1b3	sp|Q61205|PA1B3_MOUSE Platelet-activating factor acetylhydrolase IB subunit alpha1 OS=Mus musculus OX=10090 GN=Pafah1b3 PE=1 SV=1	1	2	2	2	2	2	2	1	2	2	2	1	2	2	2	1	7.3	7.3	7.3	25.853	232	232	3.12			7	1	0.0010764	12.66	7.3	7.3	7.3	3.9	79567000	26882000	26327000	18310000	8048700	60648000	46290000	36910000	0
Q61206	Q61206	3	3	3	Platelet-activating factor acetylhydrolase IB subunit beta	Pafah1b2	sp|Q61206|PA1B2_MOUSE Platelet-activating factor acetylhydrolase IB subunit alpha2 OS=Mus musculus OX=10090 GN=Pafah1b2 PE=1 SV=2	1	3	3	3	1	2	2	2	1	2	2	2	1	2	2	2	16.6	16.6	16.6	25.581	229	229	3.12			7	1	0.001336	19.187	3.9	12.2	8.3	12.2	889190000	142380000	419640000	171620000	155560000	0	562160000	0	411780000
Q61207	Q61207	2	2	2	Prosaposin	Psap	sp|Q61207|SAP_MOUSE Prosaposin OS=Mus musculus OX=10090 GN=Psap PE=1 SV=2	1	2	2	2	2	1	0	0	2	1	0	0	2	1	0	0	3.6	3.6	3.6	61.422	557	557	4				3	0.0011969	17.295	3.6	1.6	0	0	61660000	56559000	5101000	0	0	0	0	0	0
Q61233	Q61233	3	2	2	Plastin-2	Lcp1	sp|Q61233|PLSL_MOUSE Plastin-2 OS=Mus musculus OX=10090 GN=Lcp1 PE=1 SV=4	1	3	2	2	0	0	2	2	0	0	2	1	0	0	2	1	5.1	3.7	3.7	70.148	627	627	2		3			0.0010299	12.087	0	0	3.7	2.9	17327000	0	0	11298000	6028300	0	0	0	0
Q61292	Q61292	6	6	6	Laminin subunit beta-2	Lamb2	sp|Q61292|LAMB2_MOUSE Laminin subunit beta-2 OS=Mus musculus OX=10090 GN=Lamb2 PE=1 SV=2	1	6	6	6	0	2	1	3	0	2	1	3	0	2	1	3	3.4	3.4	3.4	196.58	1799	1799	1	6				0	34.447	0	1.1	0.6	1.7	39451000	0	12580000	10118000	16753000	0	0	0	0
Q61301;P26231	Q61301	16;4	16;4	16;4	Catenin alpha-2	Ctnna2	sp|Q61301|CTNA2_MOUSE Catenin alpha-2 OS=Mus musculus OX=10090 GN=Ctnna2 PE=1 SV=3	2	16	16	16	1	14	6	9	1	14	6	9	1	14	6	9	19.8	19.8	19.8	105.28	953	953;906	1.14	31	3	1		0	111.25	0.9	17.3	7	10.2	599010000	5808400	349180000	89909000	154110000	0	81937000	55530000	57525000
Q61316	Q61316	17	17	16	Heat shock 70 kDa protein 4	Hspa4	sp|Q61316|HSP74_MOUSE Heat shock 70 kDa protein 4 OS=Mus musculus OX=10090 GN=Hspa4 PE=1 SV=1	1	17	17	16	1	17	7	11	1	17	7	11	1	16	7	11	25	25	23.1	94.132	841	841	1.16	44	6	1		0	159.28	1.5	25	9.5	15.2	2442400000	20701000	1298100000	302580000	821110000	0	198050000	170650000	172400000
Q61330	Q61330	4	4	4	Contactin-2	Cntn2	sp|Q61330|CNTN2_MOUSE Contactin-2 OS=Mus musculus OX=10090 GN=Cntn2 PE=1 SV=2	1	4	4	4	0	4	1	1	0	4	1	1	0	4	1	1	4.6	4.6	4.6	113.22	1040	1040	1	6				0.00074516	23.955	0	4.6	0.9	0.9	57993000	0	46888000	3425900	7679300	0	0	0	0
Q61335	Q61335	3	3	3	B-cell receptor-associated protein 31	Bcap31	sp|Q61335|BAP31_MOUSE B-cell receptor-associated protein 31 OS=Mus musculus OX=10090 GN=Bcap31 PE=1 SV=4	1	3	3	3	1	2	1	0	1	2	1	0	1	2	1	0	19.6	19.6	19.6	27.956	245	245	2.5	1		3		0.0013928	20.592	7.8	11.8	4.1	0	45772000	8512900	16480000	20780000	0	0	0	0	0
Q61361	Q61361	8	8	8	Brevican core protein	Bcan	sp|Q61361|PGCB_MOUSE Brevican core protein OS=Mus musculus OX=10090 GN=Bcan PE=1 SV=2	1	8	8	8	4	7	6	6	4	7	6	6	4	7	6	6	8.9	8.9	8.9	95.814	883	883	1.74	19	3	7	2	0	203.97	3.6	8	5.5	5.5	1288900000	128880000	605950000	125670000	428390000	160960000	189750000	134490000	189060000
Q61411	Q61411	6	2	2	GTPase HRas;GTPase HRas, N-terminally processed	Hras	sp|Q61411|RASH_MOUSE GTPase HRas OS=Mus musculus OX=10090 GN=Hras PE=1 SV=2	1	6	2	2	5	6	3	3	2	2	2	2	2	2	2	2	45	11.1	11.1	21.298	189	189	3.67			4	8	0.0011293	13.954	31.2	45	16.9	16.9	285090000	68432000	140450000	37841000	38360000	100000000	93047000	114330000	136020000
Q61423	Q61423	1	1	1	Potassium voltage-gated channel subfamily A member 4	Kcna4	sp|Q61423|KCNA4_MOUSE Potassium voltage-gated channel subfamily A member 4 OS=Mus musculus OX=10090 GN=Kcna4 PE=1 SV=2	1	1	1	1	0	1	1	1	0	1	1	1	0	1	1	1	1.4	1.4	1.4	73.469	654	654	1	3				0.0058676	6.333	0	1.4	1.4	1.4	10139000	0	4758700	1993000	3387200	0	0	0	0
Q61425	Q61425	2	2	2	Hydroxyacyl-coenzyme A dehydrogenase, mitochondrial	Hadh	sp|Q61425|HCDH_MOUSE Hydroxyacyl-coenzyme A dehydrogenase, mitochondrial OS=Mus musculus OX=10090 GN=Hadh PE=1 SV=2	1	2	2	2	1	2	2	1	1	2	2	1	1	2	2	1	6.4	6.4	6.4	34.463	314	314	3			6		0.0011621	16.453	2.9	6.4	6.4	2.9	98073000	10439000	24012000	52907000	10715000	0	0	0	0
Q61469	Q61469	1	1	1	Lipid phosphate phosphohydrolase 1	Ppap2a	sp|Q61469|PLPP1_MOUSE Phospholipid phosphatase 1 OS=Mus musculus OX=10090 GN=Plpp1 PE=1 SV=1	1	1	1	1	0	1	0	0	0	1	0	0	0	1	0	0	5.7	5.7	5.7	31.891	283	283	3			1		0.0017833	7.0296	0	5.7	0	0	16540000	0	16540000	0	0	0	0	0	0
Q61481;Q64338	Q61481	8;2	8;2	7;1	Calcium/calmodulin-dependent 3,5-cyclic nucleotide phosphodiesterase 1A	Pde1a	sp|Q61481|PDE1A_MOUSE Calcium/calmodulin-dependent 3,5-cyclic nucleotide phosphodiesterase 1A OS=Mus musculus OX=10090 GN=Pde1a PE=1 SV=3	2	8	8	7	3	0	4	7	3	0	4	7	2	0	3	6	16.1	16.1	13.6	62.346	545	545;706	2.12		15	2		0	75.929	7	0	8.8	14.1	421470000	61630000	0	159240000	200610000	203850000	0	86586000	55064000
Q61490	Q61490	10	10	10	CD166 antigen	Alcam	sp|Q61490|CD166_MOUSE CD166 antigen OS=Mus musculus OX=10090 GN=Alcam PE=1 SV=3	1	10	10	10	3	8	2	6	3	8	2	6	3	8	2	6	11.5	11.5	11.5	65.091	583	583	1.3	17		3		0	65.483	6	11.5	4.5	6.5	551910000	48077000	325260000	27993000	150580000	54565000	78870000	36358000	59990000
Q61543	Q61543	4	4	4	Golgi apparatus protein 1	Glg1	sp|Q61543|GSLG1_MOUSE Golgi apparatus protein 1 OS=Mus musculus OX=10090 GN=Glg1 PE=1 SV=1	1	4	4	4	1	3	0	1	1	3	0	1	1	3	0	1	3.7	3.7	3.7	133.73	1175	1175	1.4	4		1		0.00079618	25.837	0.9	2.8	0	1.1	63550000	6029200	40795000	0	16726000	0	0	0	0
Q61548	Q61548	18	18	16	Clathrin coat assembly protein AP180	Snap91	sp|Q61548|AP180_MOUSE Clathrin coat assembly protein AP180 OS=Mus musculus OX=10090 GN=Snap91 PE=1 SV=1	1	18	18	16	6	16	7	14	6	16	7	14	4	14	5	12	25.2	25.2	23	91.85	901	901	1.82	53	20	17	9	0	323.31	8.2	23.4	9.2	19.6	9067700000	869930000	3670400000	1584000000	2943400000	640620000	802760000	688260000	745590000
Q61553	Q61553	11	11	11	Fascin	Fscn1	sp|Q61553|FSCN1_MOUSE Fascin OS=Mus musculus OX=10090 GN=Fscn1 PE=1 SV=4	1	11	11	11	5	6	9	10	5	6	9	10	5	6	9	10	26.6	26.6	26.6	54.507	493	493	2.21	7	27	9	4	0	129.3	11.8	13.6	21.9	24.9	2152300000	291010000	168510000	745080000	947700000	209640000	192040000	358810000	285880000
Q61584;Q9WVR4;P35922	Q61584	3;1;1	3;1;1	3;1;1	Fragile X mental retardation syndrome-related protein 1	Fxr1	sp|Q61584|FXR1_MOUSE Fragile X mental retardation syndrome-related protein 1 OS=Mus musculus OX=10090 GN=Fxr1 PE=1 SV=2	3	3	3	3	0	1	0	2	0	1	0	2	0	1	0	2	5	5	5	76.221	677	677;673;614	1.33	2	1			0.0011862	17.163	0	2.7	0	2.4	26269000	0	7634900	0	18634000	0	0	0	0
Q61595	Q61595	3	3	3	Kinectin	Ktn1	sp|Q61595|KTN1_MOUSE Kinectin OS=Mus musculus OX=10090 GN=Ktn1 PE=1 SV=1	1	3	3	3	0	2	0	1	0	2	0	1	0	2	0	1	2.7	2.7	2.7	152.59	1327	1327	1	3				0.0012747	18.184	0	2	0	0.8	30370000	0	25204000	0	5166900	0	0	0	0
Q61598	Q61598	17	12	12	Rab GDP dissociation inhibitor beta	Gdi2	sp|Q61598|GDIB_MOUSE Rab GDP dissociation inhibitor beta OS=Mus musculus OX=10090 GN=Gdi2 PE=1 SV=1	1	17	12	12	12	7	10	14	8	3	6	10	8	3	6	10	41.8	31	31	50.537	445	445	2.47	2	20	9	5	0	89.085	27	18	23.4	37.1	1767100000	295820000	155350000	593050000	722890000	317540000	157620000	201460000	215130000
Q61627;Q61625	Q61627;Q61625	2;1	2;1	2;1	Glutamate receptor ionotropic, delta-1;Glutamate receptor ionotropic, delta-2	Grid1;Grid2	sp|Q61627|GRID1_MOUSE Glutamate receptor ionotropic, delta-1 OS=Mus musculus OX=10090 GN=Grid1 PE=1 SV=2;sp|Q61625|GRID2_MOUSE Glutamate receptor ionotropic, delta-2 OS=Mus musculus OX=10090 GN=Grid2 PE=1 SV=1	2	2	2	2	0	1	0	1	0	1	0	1	0	1	0	1	2.2	2.2	2.2	112.21	1009	1009;1007	1	2				0.0010532	12.375	0	1.3	0	0.9	10544000	0	8268900	0	2274800	0	0	0	0
Q61644	Q61644	9	9	9	Protein kinase C and casein kinase substrate in neurons protein 1	Pacsin1	sp|Q61644|PACN1_MOUSE Protein kinase C and casein kinase substrate in neurons protein 1 OS=Mus musculus OX=10090 GN=Pacsin1 PE=1 SV=1	1	9	9	9	4	6	7	7	4	6	7	7	4	6	7	7	24.7	24.7	24.7	50.575	441	441	2.32	3	25	10	3	0	155.1	10.2	19	15.6	19.3	3418300000	369200000	291790000	1384400000	1372900000	453250000	537210000	575460000	610720000
Q61656	Q61656	11	11	7	Probable ATP-dependent RNA helicase DDX5	Ddx5	sp|Q61656|DDX5_MOUSE Probable ATP-dependent RNA helicase DDX5 OS=Mus musculus OX=10090 GN=Ddx5 PE=1 SV=2	1	11	11	7	2	1	7	9	2	1	7	9	1	0	4	7	17.6	17.6	11.1	69.289	614	614	2.13	2	17	3	1	0	83.252	3.3	2	11.9	14.3	593450000	71774000	20080000	200900000	300700000	122170000	0	108950000	126910000
Q61699	Q61699	17	17	17	Heat shock protein 105 kDa	Hsph1	sp|Q61699|HS105_MOUSE Heat shock protein 105 kDa OS=Mus musculus OX=10090 GN=Hsph1 PE=1 SV=2	1	17	17	17	1	14	5	13	1	14	5	13	1	14	5	13	22	22	22	96.406	858	858	1.08	35	1	1		0	135.71	1.5	18.9	6.6	17.2	1413400000	25260000	835170000	145090000	407850000	0	103820000	103890000	81088000
Q61701;Q60899;Q60900	Q61701;Q60899	5;4;2	5;4;2	5;4;2	ELAV-like protein 4;ELAV-like protein 2	Elavl4;Elavl2	sp|Q61701|ELAV4_MOUSE ELAV-like protein 4 OS=Mus musculus OX=10090 GN=Elavl4 PE=1 SV=1;sp|Q60899|ELAV2_MOUSE ELAV-like protein 2 OS=Mus musculus OX=10090 GN=Elavl2 PE=1 SV=1	3	5	5	5	0	1	2	4	0	1	2	4	0	1	2	4	14.5	14.5	14.5	42.368	385	385;360;367	2		7			0	29.645	0	2.9	5.7	11.7	104820000	0	3016200	36634000	65169000	0	0	30221000	37443000
Q61735	Q61735	3	3	3	Leukocyte surface antigen CD47	Cd47	sp|Q61735|CD47_MOUSE Leukocyte surface antigen CD47 OS=Mus musculus OX=10090 GN=Cd47 PE=1 SV=2	1	3	3	3	0	1	2	3	0	1	2	3	0	1	2	3	12.2	12.2	12.2	33.097	303	303	1.89	1	8			0	125.18	0	4.6	8.9	12.2	948730000	0	51253000	381870000	515600000	0	0	455090000	297840000
Q61753	Q61753	7	7	7	D-3-phosphoglycerate dehydrogenase	Phgdh	sp|Q61753|SERA_MOUSE D-3-phosphoglycerate dehydrogenase OS=Mus musculus OX=10090 GN=Phgdh PE=1 SV=3	1	7	7	7	2	1	5	4	2	1	5	4	2	1	5	4	12.6	12.6	12.6	56.585	533	533	2.19	2	10	3	1	0	71.002	3.8	1.7	10.5	8.4	397860000	38458000	1825000	216240000	141340000	96980000	0	74929000	106280000
Q61768	Q61768	11	7	7	Kinesin-1 heavy chain	Kif5b	sp|Q61768|KINH_MOUSE Kinesin-1 heavy chain OS=Mus musculus OX=10090 GN=Kif5b PE=1 SV=3	1	11	7	7	0	10	3	4	0	6	0	1	0	6	0	1	14	9.2	9.2	109.55	963	963	1	7				0	42.947	0	12.9	3.7	4.9	55535000	0	52245000	0	3289800	0	0	0	0
Q61792	Q61792	4	4	4	LIM and SH3 domain protein 1	Lasp1	sp|Q61792|LASP1_MOUSE LIM and SH3 domain protein 1 OS=Mus musculus OX=10090 GN=Lasp1 PE=1 SV=1	1	4	4	4	1	1	2	3	1	1	2	3	1	1	2	3	18.3	18.3	18.3	29.994	263	263	2.5		5	5		0	57.389	5.3	5.3	8.4	14.8	479970000	54523000	22282000	181540000	221630000	0	0	0	0
Q61838;Q6GQT1	Q61838	7;1	7;1	7;1	Alpha-2-macroglobulin;Alpha-2-macroglobulin 165 kDa subunit;Alpha-2-macroglobulin 35 kDa subunit	A2m	sp|Q61838|PZP_MOUSE Pregnancy zone protein OS=Mus musculus OX=10090 GN=Pzp PE=1 SV=3	2	7	7	7	1	6	3	4	1	6	3	4	1	6	3	4	4.9	4.9	4.9	165.85	1495	1495;1474	1.57	10		4		0	43.813	0.7	4.1	1.9	3	125990000	3150000	62125000	19319000	41399000	0	20538000	19902000	20738000
Q61879	Q61879	51	51	41	Myosin-10	Myh10	sp|Q61879|MYH10_MOUSE Myosin-10 OS=Mus musculus OX=10090 GN=Myh10 PE=1 SV=2	1	51	51	41	5	44	15	35	5	44	15	35	3	35	10	27	27.7	27.7	23.2	228.99	1976	1976	1.13	105	7	1	2	0	323.31	3.3	23.9	9	19.8	3054500000	90181000	1828200000	340040000	796050000	70669000	181180000	110030000	152130000
Q61885	Q61885	8	8	8	Myelin-oligodendrocyte glycoprotein	Mog	sp|Q61885|MOG_MOUSE Myelin-oligodendrocyte glycoprotein OS=Mus musculus OX=10090 GN=Mog PE=1 SV=1	1	8	8	8	3	8	6	5	3	8	6	5	3	8	6	5	25.2	25.2	25.2	28.271	246	246	3.12	1		26	6	0	100.61	13	25.2	23.6	19.9	1411100000	100140000	778650000	231110000	301190000	113710000	443740000	163270000	359810000
Q61937	Q61937	3	3	3	Nucleophosmin	Npm1	sp|Q61937|NPM_MOUSE Nucleophosmin OS=Mus musculus OX=10090 GN=Npm1 PE=1 SV=1	1	3	3	3	0	0	3	1	0	0	3	1	0	0	3	1	9.9	9.9	9.9	32.56	292	292	3		1	3	1	0.0013342	19.175	0	0	9.9	3.1	154150000	0	0	145380000	8766800	0	0	0	0
Q61990	Q61990	5	5	4	Poly(rC)-binding protein 2	Pcbp2	sp|Q61990|PCBP2_MOUSE Poly(rC)-binding protein 2 OS=Mus musculus OX=10090 GN=Pcbp2 PE=1 SV=1	1	5	5	4	1	0	5	4	1	0	5	4	1	0	4	3	15.2	15.2	13	38.221	362	362	2.46		8	4	1	0	49.225	3.6	0	15.2	12.2	345450000	61960000	0	139520000	143970000	0	0	98604000	112360000
Q62048	Q62048	3	3	3	Astrocytic phosphoprotein PEA-15	Pea15	sp|Q62048|PEA15_MOUSE Astrocytic phosphoprotein PEA-15 OS=Mus musculus OX=10090 GN=Pea15 PE=1 SV=1	1	3	3	3	3	3	2	2	3	3	2	2	3	3	2	2	31.5	31.5	31.5	15.054	130	130	4				11	0	35.257	31.5	31.5	16.9	16.9	632330000	148110000	316150000	118290000	49782000	448930000	247760000	386630000	281660000
Q62059	Q62059	3	3	3	Versican core protein	Vcan	sp|Q62059|CSPG2_MOUSE Versican core protein OS=Mus musculus OX=10090 GN=Vcan PE=1 SV=2	1	3	3	3	0	3	2	1	0	3	2	1	0	3	2	1	1	1	1	366.78	3357	3357	1.29	5	2			0.0012516	17.936	0	1	0.6	0.4	169800000	0	83558000	37320000	48918000	0	32339000	34478000	0
Q62077	Q62077	2	2	2	1-phosphatidylinositol 4,5-bisphosphate phosphodiesterase gamma-1	Plcg1	sp|Q62077|PLCG1_MOUSE 1-phosphatidylinositol 4,5-bisphosphate phosphodiesterase gamma-1 OS=Mus musculus OX=10090 GN=Plcg1 PE=1 SV=2	1	2	2	2	0	1	0	1	0	1	0	1	0	1	0	1	1.6	1.6	1.6	149.67	1302	1302	1	2				0.0011099	13.334	0	0.7	0	0.9	11864000	0	7643100	0	4221200	0	0	0	0
Q62083	Q62083	3	3	3	PRKCA-binding protein	Pick1	sp|Q62083|PICK1_MOUSE PRKCA-binding protein OS=Mus musculus OX=10090 GN=Pick1 PE=1 SV=2	1	3	3	3	0	0	2	3	0	0	2	3	0	0	2	3	7.9	7.9	7.9	46.597	416	416	2		5			0.0013996	20.96	0	0	5.5	7.9	35153000	0	0	15217000	19936000	0	0	14274000	14430000
Q62095;Q61496	Q62095	10;1	1;0	1;0	ATP-dependent RNA helicase DDX3Y	Ddx3y	sp|Q62095|DDX3Y_MOUSE ATP-dependent RNA helicase DDX3Y OS=Mus musculus OX=10090 GN=Ddx3y PE=1 SV=2	2	10	1	1	0	4	5	7	0	1	0	0	0	1	0	0	16.6	1.5	1.5	73.427	658	658;702	1	1				1	-2	0	6.2	7.3	11.9	7439400	0	7439400	0	0	0	0	0	0
Q62108	Q62108	27	27	26	Disks large homolog 4	Dlg4	sp|Q62108|DLG4_MOUSE Disks large homolog 4 OS=Mus musculus OX=10090 GN=Dlg4 PE=1 SV=1	1	27	27	26	14	24	11	19	14	24	11	19	14	24	11	18	38.8	38.8	37.6	80.471	724	724	1.77	58	28	20	6	0	224.87	23.5	35.9	19.5	25.7	4020200000	624240000	1644100000	768130000	983790000	325120000	221270000	193740000	188950000
Q9QUI0;Q62159	Q9QUI0;Q62159	2;2	1;1	1;1	Transforming protein RhoA;Rho-related GTP-binding protein RhoC	Rhoa;Rhoc	sp|Q9QUI0|RHOA_MOUSE Transforming protein RhoA OS=Mus musculus OX=10090 GN=Rhoa PE=1 SV=1;sp|Q62159|RHOC_MOUSE Rho-related GTP-binding protein RhoC OS=Mus musculus OX=10090 GN=Rhoc PE=1 SV=2	2	2	1	1	2	2	0	1	1	1	0	1	1	1	0	1	13	4.1	4.1	21.782	193	193;193	3.5			4	4	1	-2	13	13	0	4.1	161310000	42339000	106390000	0	12590000	72878000	101760000	0	0
Q62172	Q62172	2	2	2	RalA-binding protein 1	Ralbp1	sp|Q62172|RBP1_MOUSE RalA-binding protein 1 OS=Mus musculus OX=10090 GN=Ralbp1 PE=1 SV=4	1	2	2	2	0	1	0	1	0	1	0	1	0	1	0	1	3.2	3.2	3.2	75.042	648	648	1	2				0.0009828	11.663	0	1.5	0	1.7	12080000	0	9275500	0	2804300	0	0	0	0
Q62178	Q62178	1	1	1	Semaphorin-4A	Sema4a	sp|Q62178|SEM4A_MOUSE Semaphorin-4A OS=Mus musculus OX=10090 GN=Sema4a PE=1 SV=2	1	1	1	1	0	1	0	1	0	1	0	1	0	1	0	1	1.8	1.8	1.8	83.42	760	760	1	2				0.0013605	7.6337	0	1.8	0	1.8	10590000	0	7862300	0	2727800	0	0	0	0
Q62186	Q62186	3	3	3	Translocon-associated protein subunit delta	Ssr4	sp|Q62186|SSRD_MOUSE Translocon-associated protein subunit delta OS=Mus musculus OX=10090 GN=Ssr4 PE=1 SV=1	1	3	3	3	0	2	0	1	0	2	0	1	0	2	0	1	25	25	25	18.936	172	172	4				3	0.0013021	18.736	0	18.6	0	6.4	40378000	0	33194000	0	7184100	0	0	0	0
Q62188	Q62188	9	4	4	Dihydropyrimidinase-related protein 3	Dpysl3	sp|Q62188|DPYL3_MOUSE Dihydropyrimidinase-related protein 3 OS=Mus musculus OX=10090 GN=Dpysl3 PE=1 SV=1	1	9	4	4	3	5	6	8	1	1	2	4	1	1	2	4	20.4	10.2	10.2	61.936	570	570	2.18	1	7	3		0.00080451	26.056	4.2	8.4	12.8	18.9	186400000	16469000	11952000	72151000	85831000	0	0	0	0
Q62189	Q62189	5	5	4	U1 small nuclear ribonucleoprotein A	Snrpa	sp|Q62189|SNRPA_MOUSE U1 small nuclear ribonucleoprotein A OS=Mus musculus OX=10090 GN=Snrpa PE=1 SV=3	1	5	5	4	0	5	3	3	0	5	3	3	0	4	2	2	21.3	21.3	18.5	31.835	287	287	3			12		0	35.883	0	21.3	11.5	11.5	246630000	0	133690000	70235000	42699000	0	104750000	89797000	90608000
Q62261	Q62261	101	101	98	Spectrin beta chain, non-erythrocytic 1	Sptbn1	sp|Q62261|SPTB2_MOUSE Spectrin beta chain, non-erythrocytic 1 OS=Mus musculus OX=10090 GN=Sptbn1 PE=1 SV=2	1	101	101	98	31	94	52	77	31	94	52	77	30	91	52	76	49.4	49.4	48.2	274.22	2363	2363	1.37	296	62	35	5	0	323.31	16.7	46.1	27.8	39.9	24324000000	1412000000	12286000000	3368900000	7257300000	337560000	470440000	380580000	371050000
Q62277	Q62277	4	4	4	Synaptophysin	Syp	sp|Q62277|SYPH_MOUSE Synaptophysin OS=Mus musculus OX=10090 GN=Syp PE=1 SV=2	1	4	4	4	2	3	4	4	2	3	4	4	2	3	4	4	13.7	13.7	13.7	34.024	314	314	1.88	11	14	7		0	51.253	6.4	10.5	13.7	13.7	2871600000	254850000	535970000	907740000	1173000000	277860000	481090000	473440000	579540000
Q62283	Q62283	3	3	3	Tetraspanin-7	Tspan7	sp|Q62283|TSN7_MOUSE Tetraspanin-7 OS=Mus musculus OX=10090 GN=Tspan7 PE=1 SV=2	1	3	3	3	1	3	2	2	1	3	2	2	1	3	2	2	13.7	13.7	13.7	27.544	249	249	1.86	7	2	5		0.0014104	21.434	3.6	13.7	9.6	9.6	451710000	9618300	141390000	209810000	90894000	0	0	0	0
Q62318	Q62318	5	5	5	Transcription intermediary factor 1-beta	Trim28	sp|Q62318|TIF1B_MOUSE Transcription intermediary factor 1-beta OS=Mus musculus OX=10090 GN=Trim28 PE=1 SV=3	1	5	5	5	1	2	2	2	1	2	2	2	1	2	2	2	6.5	6.5	6.5	88.846	834	834	1.57	5	1		1	0	32.242	1.3	3.4	3.1	2.8	80294000	3547100	33689000	18520000	24538000	0	0	0	0
Q62348	Q62348	8	8	8	Translin	Tsn	sp|Q62348|TSN_MOUSE Translin OS=Mus musculus OX=10090 GN=Tsn PE=1 SV=1	1	8	8	8	3	4	5	6	3	4	5	6	3	4	5	6	35.5	35.5	35.5	26.201	228	228	3			18		0	77.211	16.7	14.5	30.7	31.1	582080000	86056000	83576000	281610000	130830000	205090000	145870000	188480000	162120000
Q62351	Q62351	5	5	5	Transferrin receptor protein 1	Tfrc	sp|Q62351|TFR1_MOUSE Transferrin receptor protein 1 OS=Mus musculus OX=10090 GN=Tfrc PE=1 SV=1	1	5	5	5	1	4	0	2	1	4	0	2	1	4	0	2	8	8	8	85.73	763	763	1.29	6		1		0	29.004	1.7	5.6	0	3.5	51196000	6195700	38281000	0	6718700	0	0	0	0
Q62393	Q62393	2	2	2	Tumor protein D52	Tpd52	sp|Q62393|TPD52_MOUSE Tumor protein D52 OS=Mus musculus OX=10090 GN=Tpd52 PE=1 SV=2	1	2	2	2	1	2	0	2	1	2	0	2	1	2	0	2	11.2	11.2	11.2	24.313	224	224	3			6		0.0010852	12.863	6.2	11.2	0	11.2	126870000	39248000	63219000	0	24400000	0	111910000	0	89987000
Q62417	Q62417	2	2	2	Sorbin and SH3 domain-containing protein 1	Sorbs1	sp|Q62417|SRBS1_MOUSE Sorbin and SH3 domain-containing protein 1 OS=Mus musculus OX=10090 GN=Sorbs1 PE=1 SV=2	1	2	2	2	0	2	0	0	0	2	0	0	0	2	0	0	1.9	1.9	1.9	143.07	1290	1290	1	2				0.00097418	11.586	0	1.9	0	0	15114000	0	15114000	0	0	0	0	0	0
Q62418	Q62418	7	7	7	Drebrin-like protein	Dbnl	sp|Q62418|DBNL_MOUSE Drebrin-like protein OS=Mus musculus OX=10090 GN=Dbnl PE=1 SV=2	1	7	7	7	1	0	5	5	1	0	5	5	1	0	5	5	22.5	22.5	22.5	48.699	436	436	2		11			0	57.592	3.7	0	17.4	16.7	237910000	20185000	0	108080000	109640000	0	0	47246000	40980000
Q62419	Q62419	5	2	2	Endophilin-A2	Sh3gl1	sp|Q62419|SH3G1_MOUSE Endophilin-A2 OS=Mus musculus OX=10090 GN=Sh3gl1 PE=1 SV=1	1	5	2	2	1	1	4	3	0	0	2	1	0	0	2	1	11.7	4.3	4.3	41.518	368	368	2		3			0.0014472	11.534	3.3	3.3	9.8	7.3	32833000	0	0	29595000	3237900	0	0	0	0
Q62420	Q62420	13	13	10	Endophilin-A1	Sh3gl2	sp|Q62420|SH3G2_MOUSE Endophilin-A1 OS=Mus musculus OX=10090 GN=Sh3gl2 PE=1 SV=2	1	13	13	10	6	5	11	11	6	5	11	11	5	4	9	9	38.9	38.9	31.2	39.955	352	352	2.46	1	41	20	6	0	323.31	25.9	20.7	33	36.6	5692400000	601260000	273380000	2696400000	2121400000	648950000	519700000	562190000	682270000
Q62421	Q62421	1	1	1	Endophilin-A3	Sh3gl3	sp|Q62421|SH3G3_MOUSE Endophilin-A3 OS=Mus musculus OX=10090 GN=Sh3gl3 PE=1 SV=1	1	1	1	1	0	0	1	0	0	0	1	0	0	0	1	0	3.5	3.5	3.5	38.934	347	347	2		1			0.0013538	7.4802	0	0	3.5	0	19110000	0	0	19110000	0	0	0	0	0
Q62425	Q62425	5	5	5	Cytochrome c oxidase subunit NDUFA4	Ndufa4	sp|Q62425|NDUA4_MOUSE Cytochrome c oxidase subunit NDUFA4 OS=Mus musculus OX=10090 GN=Ndufa4 PE=1 SV=2	1	5	5	5	5	5	4	3	5	5	4	3	5	5	4	3	47.6	47.6	47.6	9.3267	82	82	3.57	3			18	0	236.75	47.6	47.6	46.3	36.6	5654000000	1751500000	2188200000	1026400000	687910000	2143000000	2226100000	2789100000	3102500000
Q62433	Q62433	2	2	2	Protein NDRG1	Ndrg1	sp|Q62433|NDRG1_MOUSE Protein NDRG1 OS=Mus musculus OX=10090 GN=Ndrg1 PE=1 SV=1	1	2	2	2	0	0	1	2	0	0	1	2	0	0	1	2	7.6	7.6	7.6	43.008	394	394	2		3			0.0011561	15.579	0	0	3.6	7.6	72385000	0	0	20886000	51499000	0	0	0	0
Q62442	Q62442	2	1	1	Vesicle-associated membrane protein 1	Vamp1	sp|Q62442|VAMP1_MOUSE Vesicle-associated membrane protein 1 OS=Mus musculus OX=10090 GN=Vamp1 PE=1 SV=1	1	2	1	1	1	2	1	1	1	1	0	1	1	1	0	1	20.3	14.4	14.4	12.89	118	118	4				3	0.0011507	15.109	14.4	20.3	5.9	14.4	150130000	30115000	94733000	0	25286000	0	0	0	0
Q62443	Q62443	4	4	4	Neuronal pentraxin-1	Nptx1	sp|Q62443|NPTX1_MOUSE Neuronal pentraxin-1 OS=Mus musculus OX=10090 GN=Nptx1 PE=1 SV=1	1	4	4	4	0	0	2	4	0	0	2	4	0	0	2	4	6.9	6.9	6.9	47.117	432	432	2		6			0.00076161	24.5	0	0	3	6.9	98634000	0	0	51040000	47594000	0	0	0	0
Q62446	Q62446	4	4	4	Peptidyl-prolyl cis-trans isomerase FKBP3	Fkbp3	sp|Q62446|FKBP3_MOUSE Peptidyl-prolyl cis-trans isomerase FKBP3 OS=Mus musculus OX=10090 GN=Fkbp3 PE=1 SV=2	1	4	4	4	3	1	4	1	3	1	4	1	3	1	4	1	21	21	21	25.147	224	224	3			9		0	29.344	16.1	4.9	21	3.6	165830000	45401000	21001000	85497000	13931000	82341000	0	77077000	0
Q62448	Q62448	7	7	7	Eukaryotic translation initiation factor 4 gamma 2	Eif4g2	sp|Q62448|IF4G2_MOUSE Eukaryotic translation initiation factor 4 gamma 2 OS=Mus musculus OX=10090 GN=Eif4g2 PE=1 SV=2	1	7	7	7	0	7	0	2	0	7	0	2	0	7	0	2	8.6	8.6	8.6	102.1	906	906	1	9				0	40.833	0	8.6	0	2.1	75387000	0	63638000	0	11749000	0	14517000	0	11113000
Q62465	Q62465	4	4	4	Synaptic vesicle membrane protein VAT-1 homolog	Vat1	sp|Q62465|VAT1_MOUSE Synaptic vesicle membrane protein VAT-1 homolog OS=Mus musculus OX=10090 GN=Vat1 PE=1 SV=3	1	4	4	4	4	0	2	4	4	0	2	4	4	0	2	4	11.1	11.1	11.1	43.096	406	406	2.57		9	2	3	0	40.548	11.1	0	6.7	11.1	196480000	31637000	0	87643000	77201000	58221000	0	37154000	51072000
Q63810;Q63811	Q63810	6;1	6;1	6;1	Calcineurin subunit B type 1	Ppp3r1	sp|Q63810|CANB1_MOUSE Calcineurin subunit B type 1 OS=Mus musculus OX=10090 GN=Ppp3r1 PE=1 SV=3	2	6	6	6	5	4	2	2	5	4	2	2	5	4	2	2	45.9	45.9	45.9	19.3	170	170;179	4				15	0	323.31	38.8	29.4	12.9	15.3	2369600000	726240000	1183400000	239170000	220850000	1285300000	789040000	848310000	1050200000
Q63844	Q63844	11	8	8	Mitogen-activated protein kinase 3	Mapk3	sp|Q63844|MK03_MOUSE Mitogen-activated protein kinase 3 OS=Mus musculus OX=10090 GN=Mapk3 PE=1 SV=5	1	11	8	8	2	0	8	8	2	0	6	5	2	0	6	5	28.4	19.5	19.5	43.066	380	380	2.15		11	2		0	50.051	4.7	0	17.1	21.8	211080000	35398000	0	113600000	62090000	0	0	69278000	32536000
Q63912	Q63912	6	6	6	Oligodendrocyte-myelin glycoprotein	Omg	sp|Q63912|OMGP_MOUSE Oligodendrocyte-myelin glycoprotein OS=Mus musculus OX=10090 GN=Omg PE=1 SV=1	1	6	6	6	1	5	2	5	1	5	2	5	1	5	2	5	9.8	9.8	9.8	49.283	440	440	1.25	13	2	1		0	49.352	2.3	9.8	4.5	8.9	556210000	37667000	258760000	62766000	197020000	0	109270000	103550000	108390000
Q63932	Q63932	6	2	2	Dual specificity mitogen-activated protein kinase kinase 2	Map2k2	sp|Q63932|MP2K2_MOUSE Dual specificity mitogen-activated protein kinase kinase 2 OS=Mus musculus OX=10090 GN=Map2k2 PE=1 SV=2	1	6	2	2	3	2	3	6	0	0	0	2	0	0	0	2	12.7	5.2	5.2	44.402	401	401	2		2			0.000998	11.778	7.2	5	7.2	12.7	11230000	0	0	0	11230000	0	0	0	0
Q64010	Q64010	5	5	5	Adapter molecule crk	Crk	sp|Q64010|CRK_MOUSE Adapter molecule crk OS=Mus musculus OX=10090 GN=Crk PE=1 SV=1	1	5	5	5	2	2	2	0	2	2	2	0	2	2	2	0	21.1	21.1	21.1	33.814	304	304	3			6		0	35.47	8.6	9.2	6.9	0	115400000	45826000	34859000	34712000	0	0	0	0	0
Q64012	Q64012	1	1	1	RNA-binding protein Raly	Raly	sp|Q64012|RALY_MOUSE RNA-binding protein Raly OS=Mus musculus OX=10090 GN=Raly PE=1 SV=3	1	1	1	1	1	1	1	1	1	1	1	1	1	1	1	1	2.9	2.9	2.9	33.188	312	312	2.67		2	4		0.0050676	6.3513	2.9	2.9	2.9	2.9	24326000	3475700	2631200	9632000	8586900	0	0	0	0
Q640R3	Q640R3	3	3	3	Hepatocyte cell adhesion molecule	Hepacam	sp|Q640R3|HECAM_MOUSE Hepatocyte cell adhesion molecule OS=Mus musculus OX=10090 GN=Hepacam PE=1 SV=2	1	3	3	3	0	0	1	2	0	0	1	2	0	0	1	2	8.9	8.9	8.9	46.366	418	418	2		3			0.001227	17.699	0	0	1.9	6.9	73704000	0	0	7152900	66551000	0	0	0	0
Q64105	Q64105	7	7	7	Sepiapterin reductase	Spr	sp|Q64105|SPRE_MOUSE Sepiapterin reductase OS=Mus musculus OX=10090 GN=Spr PE=1 SV=1	1	7	7	7	2	7	5	2	2	7	5	2	2	7	5	2	32.2	32.2	32.2	27.883	261	261	3.05			20	1	0	48.926	11.9	32.2	23.8	9.2	552510000	105460000	279020000	145910000	22117000	168520000	310610000	125140000	106890000
Q64133	Q64133	6	6	6	Amine oxidase [flavin-containing] A	Maoa	sp|Q64133|AOFA_MOUSE Amine oxidase [flavin-containing] A OS=Mus musculus OX=10090 GN=Maoa PE=1 SV=3	1	6	6	6	1	1	4	4	1	1	4	4	1	1	4	4	11.8	11.8	11.8	59.601	526	526	1.92	2	9	1		0	35.38	1.7	1.7	7.8	8.2	165570000	3880500	4158400	61160000	96374000	0	0	0	0
Q641P0	Q641P0	7	4	4	Actin-related protein 3B	Actr3b	sp|Q641P0|ARP3B_MOUSE Actin-related protein 3B OS=Mus musculus OX=10090 GN=Actr3b PE=1 SV=1	1	7	4	4	3	1	4	6	1	0	2	3	1	0	2	3	17.2	9.6	9.6	47.579	418	418	2.17		5	1		0.00081566	26.625	7.9	2.9	13.2	12	129630000	2337200	0	70079000	57218000	0	0	0	0
Q64331	Q64331	6	6	6	Unconventional myosin-VI	Myo6	sp|Q64331|MYO6_MOUSE Unconventional myosin-VI OS=Mus musculus OX=10090 GN=Myo6 PE=1 SV=1	1	6	6	6	0	4	0	3	0	4	0	3	0	4	0	3	5.3	5.3	5.3	146.41	1265	1265	1	7				0	36.719	0	3.9	0	2.2	49459000	0	32816000	0	16643000	0	0	0	0
Q64332	Q64332	21	18	17	Synapsin-2	Syn2	sp|Q64332|SYN2_MOUSE Synapsin-2 OS=Mus musculus OX=10090 GN=Syn2 PE=1 SV=2	1	21	18	17	10	10	19	18	8	8	16	16	8	8	15	15	47.4	43.2	41.8	63.372	586	586	2.16	12	55	20	3	0	323.31	19.1	20.3	36	42.3	13488000000	1337900000	740690000	6356000000	5053600000	1055300000	640590000	1123600000	1055100000
Q64373	Q64373	1	1	1	Bcl-2-like protein 1	Bcl2l1	sp|Q64373|B2CL1_MOUSE Bcl-2-like protein 1 OS=Mus musculus OX=10090 GN=Bcl2l1 PE=1 SV=1	1	1	1	1	0	1	1	0	0	1	1	0	0	1	1	0	3.9	3.9	3.9	26.132	233	233	3			2		0.0017683	6.8381	0	3.9	3.9	0	15860000	0	9072700	6786900	0	0	0	0	0
Q64433	Q64433	6	6	6	10 kDa heat shock protein, mitochondrial	Hspe1	sp|Q64433|CH10_MOUSE 10 kDa heat shock protein, mitochondrial OS=Mus musculus OX=10090 GN=Hspe1 PE=1 SV=2	1	6	6	6	5	6	4	3	5	6	4	3	5	6	4	3	59.8	59.8	59.8	10.963	102	102	4				22	0	75.902	52.9	59.8	41.2	31.4	2165600000	942160000	944600000	162030000	116840000	873280000	507770000	462510000	553980000
Q64471	Q64471	2	2	2	Glutathione S-transferase theta-1	Gstt1	sp|Q64471|GSTT1_MOUSE Glutathione S-transferase theta-1 OS=Mus musculus OX=10090 GN=Gstt1 PE=1 SV=4	1	2	2	2	0	2	0	1	0	2	0	1	0	2	0	1	10	10	10	27.374	240	240	3			3		0.00097324	11.579	0	10	0	4.6	18230000	0	15591000	0	2638700	0	0	0	0
Q64487;A2A8L5	Q64487	7;1	7;1	6;0	Receptor-type tyrosine-protein phosphatase delta	Ptprd	sp|Q64487|PTPRD_MOUSE Receptor-type tyrosine-protein phosphatase delta OS=Mus musculus OX=10090 GN=Ptprd PE=1 SV=3	2	7	7	6	0	6	2	3	0	6	2	3	0	5	1	2	4.1	4.1	3.6	214.41	1912	1912;1898	1.17	10	2			0	44.704	0	3.7	1	1.5	137230000	0	81396000	14146000	41683000	0	22805000	14757000	18339000
[truncated: 1,321 more rows]
[truncated: 18 more columns]

## Sheet: Contaminants removed
Protein IDs	Majority protein IDs	Peptide counts (all)	Peptide counts (razor+unique)	Peptide counts (unique)	Protein names	Gene names	Fasta headers	Number of proteins	Peptides	Razor + unique peptides	Unique peptides	Peptides Cx6_1	Peptides Cx6_2	Peptides Cx24_1	Peptides Cx24_2	Razor + unique peptides Cx6_1	Razor + unique peptides Cx6_2	Razor + unique peptides Cx24_1	Razor + unique peptides Cx24_2	Unique peptides Cx6_1	Unique peptides Cx6_2	Unique peptides Cx24_1	Unique peptides Cx24_2	Sequence coverage [%]	Unique + razor sequence coverage [%]	Unique sequence coverage [%]	Mol. weight [kDa]	Sequence length	Sequence lengths	Fraction average	Fraction 1	Fraction 2	Fraction 3	Fraction 4	Q-value	Score	Sequence coverage Cx6_1 [%]	Sequence coverage Cx6_2 [%]	Sequence coverage Cx24_1 [%]	Sequence coverage Cx24_2 [%]	Intensity	Intensity Cx6_1	Intensity Cx6_2	Intensity Cx24_1	Intensity Cx24_2	LFQ intensity Cx6_1	LFQ intensity Cx6_2	LFQ intensity Cx24_1	LFQ intensity Cx24_2
[truncated: 2,413 more rows]
[truncated: 18 more columns]

[truncated: 2 more sheets: Proteins with 1 peptide removed, Prot with 2 or less pept remove]
