# Supplementary material for: Decoupling of mRNA and Protein Expression in Aging Brains Reveals the Age-Dependent Adaptation of Specific Gene Subsets
Source: Cells. 2023 Feb 14;12(4):615. doi: 10.3390/cells12040615 (PMC9954025; doi:10.3390/cells12040615)
Supplement: Supplementary file 1 [file cells-12-00615-s001.zip › Khatir et al. Supplemental Table S4.xlsx]

## Sheet: Quantitative Data
ID	LFQ_intensity_Cx6_1	LFQ_intensity_Cx6_2	LFQ_intensity_Cx24_1	LFQ_intensity_Cx24_2	Gene_names
protein_1	4.85793476612526	4.86410919389486	24.943287822875	24.8405255472708	Nova1
protein_12	4.85793476612526	4.86410919389486	23.0339915507849	23.5895514882224	Shroom4
protein_27	25.3802052664085	24.927776515591	25.1482562336047	24.7274393940581	Scn3a
protein_30	25.4162223170577	26.259938322036	26.9745411525437	26.7335032155975	Gnai1
protein_34	27.3963185083275	27.8225015910297	27.0881067624384	27.5867056951994	Ptprz1
protein_35	32.2417837030657	32.002293306289	31.3201778841287	32.2000520887049	Hist2h2ac
protein_82	28.4620139240171	28.3198011662197	28.5093750167943	28.5547184695446	Gls
protein_90	24.6733051931508	24.8601757686331	24.3833731250447	25.0436848345036	Ryr2
protein_97	26.9042612233284	26.8192156841637	27.7467597064977	27.8656132164364	Rap1gds1
protein_98	26.9434666896937	27.5547916452207	27.1009925480002	27.5296210694858	Syngap1
protein_102	29.3392187351782	29.1750282067018	28.921048223274	29.2453812642164	Atp2b1
protein_108	26.6177889343469	27.3023431454037	26.7259844356743	25.524533824128	Sec22b
protein_109	32.5364460672018	32.3824189623045	32.2549330084769	32.4426293541175	Dpysl2
protein_113	27.0233741690151	26.3852013751713	27.351781459935	26.8820369834743	Clta
protein_115	30.8339436838102	30.3472047191772	30.8860557163295	30.716694044045	Stxbp1
protein_118	29.8010698797179	30.0576276853949	29.5170006209171	29.8120857458562	Prdx6
protein_119	29.0999398334916	28.6769403745901	28.9661749763391	28.9236288454786	Dld
protein_120	27.6071728219632	27.7173806446825	27.0044246848619	27.4012103865637	Hsd17b10
protein_128	25.1194154787637	25.1345739068362	27.3692790348462	26.7408543795231	Flot1
protein_131	26.8209204219188	27.6483537415945	26.8986218673382	27.0983844210861	Psmb1
protein_140	29.1208248315984	30.1069933679139	29.8938283764732	29.9629251655799	Phb2
protein_144	28.0785699250491	27.6239399690328	28.1936164206052	27.9201964559609	Ddt
protein_145	4.85793476612526	4.86410919389486	23.4504813277408	23.6257801770921	Ptpn9
protein_154	26.5096921407533	25.2908788862146	25.8644801356471	26.1102832104996	Pld3
protein_157	30.5383438936302	31.3467821680895	31.4381241000755	31.0099195521221	Stx1a
protein_163	4.85793476612526	4.86410919389486	24.5936031234191	24.9062355369812	Anxa3
protein_164	25.8912923646956	26.7661028247164	26.1470918620899	27.0332816695127	Ap1b1
protein_169	27.4387289184417	27.5199833929683	26.7773095019388	27.2159531443948	Hnrnph2
protein_181	27.126522365258	26.3376630028683	26.5912077563398	27.1906527026777	Rgs7
protein_183	4.85793476612526	4.86410919389486	25.1857468555409	25.0996088216507	Gucy1b3
protein_184	4.85793476612526	4.86410919389486	25.20832576008	25.8959209901838	Cd200
protein_186	26.9252429310748	27.8421213627542	29.0026554605242	28.0709664353628	Crym
protein_191	27.9863627923273	28.1200090582993	27.9289174369956	27.6932527629264	Pgrmc1
protein_192	28.4939636516101	28.5888155523655	28.1162455900051	28.4095696251621	Impa1
protein_193	4.85793476612526	4.86410919389486	23.4217535874201	23.7774600100022	Entpd2
protein_196	30.4821229825435	30.3112718311251	31.6076137838644	29.9863085362945	Snca
protein_199	29.6724118260951	30.6757296648946	30.1287852624342	30.3397921476101	Syngr1
protein_202	28.7330829393953	28.9282115276971	28.4247034916297	28.6388931867568	Gbas
protein_203	29.5255758574278	29.5472533752199	29.7669716183927	29.769054591086	Sept7
protein_207	28.1457905356725	28.494078134559	28.0957715706183	28.6415139495567	Atp2a2
protein_209	27.7434890875748	28.0493674889455	27.2703495132189	27.6316614440832	Psmb5
protein_211	25.0694818914126	27.0849685970592	24.0742270648166	26.6082309041821	Pip5k1c
protein_212	4.85793476612526	4.86410919389486	26.3810308996882	26.4295959933264	Pip4k2a
protein_214	28.4501823871732	28.8259013116019	27.9208211344902	28.0597175946105	Eef1b
protein_221	27.909306418567	28.0074755167443	27.5288017584103	27.8365944793027	Psma3
protein_233	27.8523382423448	26.8821536261587	28.3869368914661	28.3294998486869	Wdr1
protein_238	4.85793476612526	4.86410919389486	23.9844191542017	23.7436560044953	Klc2
protein_249	29.5102242993101	28.7899226269994	29.5964602386103	29.9682916753297	Hnrnpa2b1
protein_252	4.85793476612526	4.86410919389486	27.0614697516892	26.941453158256	Pak1
protein_257	28.0162706773362	25.6258359043471	27.2802967235553	27.2328818436724	Ctbp1
protein_259	26.3900326021162	27.1477323827129	26.8884383676405	26.9969039162022	Bsn
protein_264	30.6293180676555	30.3492101484628	30.3574138749636	30.2109470005587	Syn1
protein_265	27.1804449121613	26.4050470410639	4.6001674216506	4.6880594432988	Lin7b
protein_266	26.2630767416085	25.7388462020772	4.6001674216506	4.6880594432988	Lin7c
protein_271	28.509941260685	27.3800566022259	28.3225972961344	28.2626646530835	Coro1a
protein_276	30.5580989667383	31.0731009876261	29.2727092957731	29.7869198474204	Mtco2
protein_279	29.3430160010887	30.1268177271264	30.0347252176797	30.0930784014983	Ca2
protein_280	32.8246235618294	32.7622818262761	32.357335214686	32.4371568553604	Thy1
protein_281	34.301847299945	33.7435452636945	33.0085678311356	33.3870242289826	Hba
protein_282	33.9315685693242	33.2863689136748	32.6970204379022	32.8109795122655	Hbb-b2
protein_288	30.8249459496651	29.4992394989652	29.2474426943634	29.7919261870761	Mtatp8
protein_292	31.3328747753302	33.2900824164738	31.5608341072963	33.2626254537508	Mbp
protein_295	29.1517533960245	29.2136608179265	29.0009109194416	29.3348575978483	Aldoc
protein_296	32.0405503297621	32.0424759469655	32.1757539892447	32.0277236649884	Aldoa
protein_297	30.3033452136621	29.7446763457131	29.8831592780592	29.8028115857923	Got1
protein_298	31.5196741466373	30.6299259752815	30.4730524333784	30.6650076522236	Got2
protein_300	4.85793476612526	4.86410919389486	25.3057734296639	25.079200896148	Src
protein_302	29.7846909521489	31.1102956577734	30.8395107467241	30.6715179054927	Ldha
protein_303	29.5364368033904	29.7267315841985	29.828808994899	29.8582648453238	Gpi
protein_306	4.85793476612526	4.86410919389486	29.7267802978384	28.5596859797833	Gap43
protein_307	26.9727896445773	26.5176877678707	4.6001674216506	4.6880594432988	Ttr
protein_309	29.734811753312	29.5138987572373	28.2567840640072	28.8376173472715	Alb
protein_311	28.5763622062382	29.2509019897083	28.836684761536	28.9480426032252	Hsp90aa1
protein_313	25.5544403681211	27.0435388306825	27.040511137985	27.0162706773362	Hsp90b1
protein_315	27.2907910214781	28.1000401251177	27.1163447545266	27.5072590737643	Apoe
protein_316	31.3431325187371	31.5017563389303	31.4874038927194	31.4133680009899	Sod1
protein_317	31.6562955708586	33.0649837502859	33.1009299079186	33.2873325918714	Mdh2
protein_319	24.4211115049666	25.7791145632201	26.3384793339281	28.3023867280649	Nefl
protein_320	26.6258916294496	28.8199160880981	28.1134165319959	28.8894831679572	Nefm
protein_323	4.85793476612526	4.86410919389486	24.9364743988017	25.75798994132	P4hb
protein_325	30.5904940808165	30.3988684312948	30.1472229008088	30.2836119951196	Pgk1
protein_326	28.4088411343694	28.1340352680365	28.7107297774767	28.5872066185588	Fth1
protein_328	30.7912586428326	30.9293831479936	29.9364912478932	29.985765863713	Sod2
protein_331	27.7727869432481	27.1371174804972	4.6001674216506	4.6880594432988	H2afz
protein_334	30.3701525257942	29.9721322804829	30.8401863590562	30.2330647643067	Uba52
protein_336	32.2599910590283	31.6449550842612	31.3396328892388	31.6309241249126	Calml3
protein_337	30.0518064466661	29.9468442241514	29.7488240717901	29.8958516703929	Eef1a1
protein_341	27.3053037712248	27.776870430381	27.8666746720631	28.0382100216485	Eif4a2
protein_342	29.1050208525153	28.0784172292835	28.526266396648	28.6487994358158	Mapt
protein_343	29.4430445153164	29.0141966549507	4.6001674216506	4.6880594432988	Txn
protein_344	31.1178066400354	31.0044380797994	30.6427192805674	30.8368051290592	Gstm1
protein_346	27.6085129284311	27.7110909560679	27.0761248513064	27.5905654642579	Slc3a2
protein_347	32.515708988108	32.3281465940443	31.5922776081062	32.7569050333582	Hist1h2bk
protein_351	28.9261765769641	28.9124792827395	28.7460869496298	28.9203952466521	Fabp3
protein_352	29.7337941043413	30.8286576976369	30.4657741662977	30.5134281955577	Hsp90ab1
protein_355	31.8201215769034	31.2623734326058	31.4564530428692	31.3153808439128	Camk2a
protein_357	26.0697686810052	25.6578003549915	26.8929603811153	27.0390472159508	Tcp1
protein_359	4.85793476612526	4.86410919389486	26.4526664318178	26.7785632562897	Prkar2a
protein_361	28.7319508176276	28.708100300448	28.0852219281177	28.3335573444083	Calb1
protein_362	29.3354114482385	29.0928012484408	28.5810762533182	29.1431648892935	Cox5a
protein_365	27.4940399745855	27.8058737353064	27.9224100058412	27.9870137056177	Cntn1
protein_366	28.1599543863735	26.9267138566978	4.6001674216506	4.6880594432988	Rpl7a
protein_368	28.5248102790675	29.2446783456201	29.2654618539212	29.3623556201892	Ncam1
protein_369	26.1616370540229	28.2374023268394	27.6280493211444	27.8117642982673	Gpd1
protein_370	30.7997737963016	31.1061822165601	30.9997422394747	31.2358057943413	Atp1b1
protein_373	28.0261213553633	28.1640854331302	27.66627818955	28.1215907441268	Rps16
protein_374	28.6003117584121	28.29614100162	27.4704946689161	27.8621876483485	Rpl7
protein_375	31.1889564120168	32.3860478029923	32.1377893110641	32.1357423063955	Mdh1
protein_376	27.1667211935421	25.4293086579333	27.0088115682566	27.0831432990906	Rpsa
protein_377	27.2974535370017	26.8365342880082	26.9690606147233	26.976399802772	Calr
protein_378	28.7412402472312	26.5778752583337	26.9991642662642	27.756272787726	Atp1b2
protein_379	4.85793476612526	4.86410919389486	25.0177578824287	25.275011925545	Psmd3
protein_381	25.6893385800208	22.0999538747389	26.3047817491322	27.0407201484947	Anxa6
protein_382	26.1356897181679	27.3511917279471	28.2635155760373	28.3260741368499	Rplp0
protein_383	27.5255198532726	28.2814026607814	28.0481724521984	28.2147032360523	Map1b
protein_384	30.6801807460612	29.6780996854177	30.1831693257909	30.3449849439758	Glul
protein_389	30.8516236241311	30.5785772077658	30.3205545036943	30.5748836469937	Nme1
protein_392	30.7193895260096	31.7876438867474	31.9333285976514	32.171525043009	Ldhb
protein_393	27.7441951425997	29.1583660716007	28.0783154231272	29.2176411157055	Cnp
protein_397	4.85793476612526	4.86410919389486	24.8999819327493	24.5544403681211	Ass1
protein_398	29.2961628869977	29.8893090871074	29.5851302313826	29.6092001316562	Sptan1
protein_400	32.9415720906194	32.872359314924	33.8099069192194	33.7259844356743	Gapdh
protein_401	4.85793476612526	4.86410919389486	25.9413636027117	25.5612166135116	Hspa2
protein_402	31.9647506426995	31.4385207309013	31.5474280629073	31.4598761565645	Eno1
protein_403	30.0054423458266	30.0585311040661	29.8840040666989	29.969801704056	Eno2
protein_404	29.0839801806692	28.7291976747004	28.5955891157071	28.474523031203	Ap2a1
protein_405	27.3524551442997	27.4627940543778	27.6148439422323	27.5841984661649	Ap2a2
protein_408	28.8136613334399	29.1564384942669	29.2997694352219	29.3254309093031	Hk1
protein_409	32.4696119632652	32.4156613738553	32.1308728327602	32.5625636847995	Ppia
protein_410	32.3486299160845	32.5022070069452	32.0063121446022	32.1467375126165	Tpi1
protein_417	31.5529794554862	32.194602975158	32.0049403001972	32.3018200507493	Cfl1
protein_418	31.1971836158086	30.9885449055024	31.8761708320464	31.6510001741823	Gnao1
protein_419	25.0822907024102	25.9722199463368	25.3655962439878	25.6951129336181	Fasn
protein_420	30.5007596255895	30.7984610970008	30.3962164176052	30.5149334529915	Gstp2
protein_424	28.6151597648026	29.2172944334611	28.8288695093614	28.9577876720668	Cox5b
protein_425	30.9917916302053	30.8369555743423	30.304759994112	30.776588099514	Cox4i1
protein_426	26.699488155126	26.8780655105275	27.4463220677639	27.6618688677842	Hspa5
protein_427	4.85793476612526	4.86410919389486	22.9295293220212	23.4925280276618	Hexb
protein_428	27.9050076478583	29.1364575605158	28.5964424658486	28.2136376445223	Prdx3
protein_429	4.85793476612526	4.86410919389486	25.8670283171295	26.1371174804972	Vim
protein_431	28.2099250973349	28.8550446253671	28.7819117034915	28.839120248673	Map2
protein_434	30.0178375108817	29.5774971440501	29.0901025235277	29.2411586062386	Tpm3
protein_436	27.3030403100399	26.9713649769442	27.0638369350946	27.2210342002824	Gna11
protein_439	4.85793476612526	4.86410919389486	25.1909917216056	24.7331411387878	Lmnb2
protein_447	29.230066515437	28.5980411381662	28.8636651838014	27.8502529490197	Pcmt1
protein_450	24.8615962102059	26.9322446741749	24.8301155428979	26.288610262282	Gria2
protein_453	4.85793476612526	4.86410919389486	24.1015737182647	24.2922137717844	Bcat1
protein_454	27.2868315595447	26.8588724674769	27.4456908294949	27.5937740689778	Ppib
protein_455	27.7291652534943	27.7638256837021	26.9708166530271	27.4199711043539	Gsta4
protein_458	4.85793476612526	4.86410919389486	24.5463372977495	24.6543624417778	M6pr
protein_459	27.7605301216415	27.7820679830823	26.756081866659	27.4452172194756	Rps2
protein_463	29.9098500166692	29.1958938725028	29.1576676223631	29.3391974933033	Glud1
protein_467	30.7053671430759	30.2238902021262	30.4231210728742	30.7254969563519	Fkbp1a
protein_475	25.9123936213384	25.6121179780431	27.4722003489783	27.7530874666385	Pdia3
protein_479	28.7424936049968	26.9969039162022	29.040667898706	28.8665862472498	Camk2b
protein_480	27.0761248513064	25.914356844742	26.4101521530584	26.4872313685482	Nap1l1
protein_484	29.7271212472698	30.5122982209231	30.2744210603703	30.1324671743626	Napb
protein_490	4.85793476612526	4.86410919389486	26.0233530165246	26.3419605581651	Pabpc1
protein_495	30.2639408493805	29.7423811686358	29.5428147350754	29.5102431665776	Ckmt1
protein_501	27.5163056313323	26.1630585799698	26.4524307884592	26.2954404941817	Slc6a11
protein_503	27.523128315152	26.8220152620041	27.4555225088209	27.1718828986579	Map2k1
protein_513	28.7759291125454	28.7082318881841	28.0655840993826	28.5581902216825	Mif
protein_517	27.5937028441232	28.1034458987105	27.7964356539173	27.4518336529677	Rab5c
protein_518	32.4441609038827	32.3608445312486	31.6640752131977	31.9452052931171	Rab6a
protein_519	26.0267123729599	26.507168321104	25.7233045140905	26.2846624509135	Rab21
protein_525	29.1431162211186	28.5766505290052	28.4594364966824	28.5549745681743	Pdha1
protein_528	26.3665136547151	26.3679969573767	26.0330925889703	26.4588266131803	Canx
protein_530	29.3090611027589	30.0483023954582	29.0845378321432	29.4502020562194	Prdx1
protein_531	32.6173904850758	33.6438806111044	33.9863424465541	33.8043396260583	Gpm6a
protein_532	28.8622763431612	29.6122621334535	28.9240254548864	28.3379436687735	Gpm6b
protein_534	28.5256691928556	28.1163943342314	4.6001674216506	4.6880594432988	Rpl18
protein_539	29.941956804636	30.1312409141605	30.0721427470341	30.2528202423624	Dnm1
protein_543	27.5255945249965	25.9811122151525	27.4511261990419	27.7370545064568	Tkt
protein_547	4.85793476612526	4.86410919389486	24.3314232428966	24.5662199161114	Acsl1
protein_550	27.7127971227923	28.1528656724875	28.185557835555	28.2394979433466	Pura
protein_552	26.418636816111	26.7309149568465	26.6525310032049	26.878650236771	Cct8
protein_553	30.9513677645621	30.4721809775737	30.6224395786165	31.0622034792691	Slc1a2
protein_555	28.5169442828809	27.3059995069865	26.0835491204831	26.7945158173451	Hist1h1e
protein_560	4.85793476612526	4.86410919389486	24.7790143412651	24.5301124328851	Acadm
protein_562	30.7749400673572	30.6218285075829	30.4107425315831	30.4231210728742	Syt1
protein_564	29.753151242031	29.4495921910564	29.6610703578521	29.4834882697532	Nsf
protein_566	29.6123324479393	29.4332266499319	29.0551209644976	29.1388513864351	Rab11a
protein_573	28.5916714561827	28.3997853013866	29.3768731670201	29.6731703807374	Capza2
protein_574	29.0081169758861	29.3964614232028	28.9916429816498	29.0224219997753	Capzb
protein_578	27.9195146798488	28.0878539374828	27.4286220138693	27.6981637310534	Pfkm
protein_579	26.8052587495599	27.0906325781347	26.7341495553964	27.6018707394027	Rpl6
protein_583	28.1550876561149	27.4590455753846	26.405696311466	27.0660975688121	Rpl13
protein_586	27.2868315595447	28.1147076676687	27.5220807693058	28.0002931146501	Anxa5
protein_587	4.85793476612526	4.86410919389486	25.4495370937645	25.0193284054522	Gad1
protein_588	4.85793476612526	4.86410919389486	25.7489104227004	25.2360431052309	Gad2
protein_591	25.7837422376934	27.0476005627713	26.0692974965651	26.7998355409697	Hspa4l
protein_592	27.8156780206834	28.2893404802061	27.8773635260642	28.0648135524216	Cbr1
protein_594	28.9483211534241	28.7912586428326	28.2939946224838	28.4921306878389	Gstm5
protein_595	32.013850694488	33.3133818653125	32.8115346489885	33.0162108915121	Slc25a4
protein_597	27.6481479901205	27.3680302725066	27.3104269525942	27.7195364075573	Hnrnpa1
protein_603	4.85793476612526	4.86410919389486	25.976399802772	26.1997409303552	Ahcy
protein_604	29.2832587289084	28.8331897276703	29.3819550483585	29.1046710113356	Gdi1
protein_606	30.1875413113238	29.0822043996667	30.3990722305664	30.4056800832666	Atp6v1a
protein_607	30.3950929425954	30.8122234871866	30.8291115418312	30.5623817216233	Atp6v1e1
protein_608	4.85793476612526	4.86410919389486	24.8470416662676	25.0438516779224	Acadvl
protein_610	4.85793476612526	4.86410919389486	24.3489485452972	24.7249963061579	Pa2g4
protein_611	28.9669450444349	29.5323363639587	28.3410443673801	28.5077883505338	Rab7a
protein_612	4.85793476612526	4.86410919389486	25.8385072539659	25.7677956989396	Acadl
protein_613	27.8959672015274	27.9443606912968	4.6001674216506	4.6880594432988	Rpl9
protein_615	24.8464678969798	25.7075145894383	25.4880286409512	25.6819606904695	Hsd17b4
protein_618	29.1331779279923	28.6282231880042	29.8969488428106	30.1930758785262	Atp6v0d1
protein_619	31.4127120814329	32.215467197596	31.2295738406298	31.7056555214171	Slc25a5
protein_620	27.5219310577879	27.9614079183967	27.9487667219073	27.9114224364879	Tst
protein_621	30.5537119274399	30.7942834057391	31.116505882338	31.0739309482876	Pkm
protein_623	26.9685114141224	27.2316007494253	27.3263742115895	27.3972165953065	Hrsp12
protein_625	27.5181832117542	28.0021189033026	26.859465023053	27.5701492885984	Rpl10a
protein_629	27.7268290098335	28.4437164278717	27.6579229862161	28.3778661602906	Pitpna
protein_631	29.0731903909493	29.2808940349503	28.0565169960053	28.3759209066954	Rab2a
protein_633	28.9677696615215	28.0693282306764	4.6001674216506	4.6880594432988	Stmn1
protein_634	4.85793476612526	4.86410919389486	24.7382019634643	24.7027146563514	Cacnb3
protein_636	4.85793476612526	4.86410919389486	24.6542531673948	24.7818679421723	Psmc4
protein_640	27.3968084432566	26.9115938695629	27.004210348947	26.9780378020861	Ncan
protein_643	4.85793476612526	4.86410919389486	24.9136951260494	25.3579004245607	Adk
protein_645	26.6548540741018	26.5701782479111	4.6001674216506	4.6880594432988	Stmn2
protein_646	30.4522854558667	29.8676911680673	29.9934797432913	30.3860735068815	Atp5j2
protein_653	28.7293921866382	28.074696642268	27.909935829228	28.2783925261317	Cox6b1
protein_654	27.3020816217846	27.371939454047	27.4601398881949	27.6990247449907	Cyb5a
protein_655	27.2917572393869	26.8285669116631	27.1321239265563	26.3717068631235	Usp5
protein_656	31.4651903156055	31.2141357907028	31.2873601160778	31.3911538759798	Atp5b
protein_657	30.4852938477415	29.7780618852887	29.8548217636936	30.1350389331064	Slc1a3
protein_659	25.6921088963124	24.3800070440938	4.6001674216506	4.6880594432988	Pdcd5
protein_662	29.587957677635	29.4885918322857	29.2612528056729	29.2360111618079	Atp6v1d
protein_665	26.2819597319904	27.3660300017655	26.3135613462795	26.9662024858501	Actn4
protein_669	27.3270598624268	27.4215770432306	26.9020771501033	27.2808276792286	Eef2
protein_682	30.0272293148194	29.9189747118378	29.5891192607135	29.7917088809994	Arpc4
protein_683	4.85793476612526	4.86410919389486	23.8928214533824	23.904169328998	Ruvbl1
protein_684	29.2150736921714	31.9023934706868	30.4246234108636	31.8014708125321	Plp1
protein_685	4.85793476612526	4.86410919389486	22.2738957424308	22.9881000764988	Eif3e
protein_688	27.4223793427957	27.708659465456	27.3920654216186	27.5432573700884	Pdxp
protein_690	34.1385066028485	34.2230990340006	34.1967440601131	34.1300136107765	Actg1
protein_692	4.85793476612526	4.86410919389486	25.2645270733944	25.262736329109	Eif4a1
protein_693	28.1331534250745	28.5288390099187	28.0004543066252	28.3025174681493	Rps20
protein_694	31.9050148231431	32.3332214327974	31.6541199780489	31.8645583586184	Snap25
protein_695	30.4575786763859	31.2384846828467	30.9953006895211	30.2844947823834	Dnajc5
protein_696	30.0672778554286	29.9696644940087	29.8103552068781	29.7522102689833	Rab5b
protein_698	27.9896144259661	29.0135578938994	28.5535837716905	28.4928183221889	Rab10
protein_703	30.3816456894979	30.1147076676687	29.6314706446738	30.0654813835632	Ube2n
protein_704	27.878357903273	26.6559459909304	27.4394424763035	27.8724400475134	Actr2
protein_706	31.0104532165442	31.4100348573258	31.0494064408741	30.9761676024023	Arf2
protein_708	28.2543079520187	27.6777469502956	28.0888649715764	28.3937436167116	Rap2b
protein_710	30.5275719187184	31.8957289084245	31.3843760671154	31.5630184923569	Stx1b
protein_713	28.2265568370156	28.2754205027663	27.7835674064366	28.1496716195677	Rpl27
protein_717	28.1795435390609	27.7976729037173	28.3271027047865	28.6718552990959	Abat
protein_721	28.7468237622215	27.7469518651377	28.3591328416649	28.4826230968248	Hnrnpk
protein_722	32.1943094282383	32.6705896660286	32.6176532112392	32.3617074575379	Ywhag
protein_724	28.0128655834624	28.1069434640746	27.7818179276105	27.6036402662293	Rps7
protein_727	4.85793476612526	4.86410919389486	25.2456487368118	25.0764714887988	Psmc1
protein_728	4.85793476612526	4.86410919389486	25.2542538803562	25.2946695429404	Psmc5
protein_729	28.0880562009917	27.9435784701951	27.0541377615406	27.884135110267	Rps8
protein_730	27.0784681296678	27.6495876346059	27.1992916209516	27.9478754472871	Rps15a
protein_732	33.6218939918608	33.8188843964765	33.6403291612972	33.5755374652464	Ywhae
protein_734	27.5328936688062	28.1914059699137	28.1568242158228	27.845774287832	Rps23
protein_735	27.3213074480012	27.5462784134394	26.7850652730265	26.9280703043798	Rps18
protein_747	4.85793476612526	4.86410919389486	26.1034959236776	26.3264256467071	Abi2
protein_750	28.1316334308385	28.182861606395	27.7164651045325	27.9780923700472	Rps4x
protein_754	28.7336648276961	29.7186712230991	29.6768731395888	29.7624323260759	Ap2s1
protein_757	28.2304559531861	27.3914099862999	4.6001674216506	4.6880594432988	Rpl23a
protein_759	30.3508967715289	30.718491591477	30.7149761114977	30.9247900366931	Vsnl1
protein_761	32.7745670369632	32.2537784130731	30.9242945206172	32.3562072791608	Hist1h4a
protein_762	4.85793476612526	4.86410919389486	24.772384251074	24.8579001491556	Gabra1
protein_763	29.5172447269879	29.6195390559203	29.8622911250998	29.6392728024809	Atp6v1b2
protein_766	28.8142421839351	29.1890742744442	28.8664978170165	29.1019193033558	Ran
protein_769	27.7249442805889	27.4310955935393	26.4768110851985	27.208902469754	Rps25
protein_770	27.4586545481316	27.7981675066931	4.6001674216506	4.6880594432988	Rps26
protein_773	26.4233415137029	27.1104823539937	26.8368953981117	27.0410336074945	Tceb2
protein_774	31.0590470894224	32.367967806007	32.6656007088891	32.269552771948	Gnb1
protein_778	31.1201574150315	30.5271057964434	29.9019621072389	30.2916474744809	Cycs
protein_779	27.6141418666718	27.745093258622	27.166816948697	27.6865228613787	Rpl31
protein_780	27.9953950463073	28.4349173044917	28.2068550374081	28.2848918604871	Rps3
protein_781	27.6863892785044	27.5670327674921	4.6001674216506	4.6880594432988	Rpl8
protein_784	30.052454412112	30.2148884760026	30.5786671765876	30.1196628332506	Rac2
protein_785	4.85793476612526	4.86410919389486	26.2426538414281	26.342062321235	Pafah1b1
protein_786	30.427023902334	31.3198011662197	30.96506040009	30.7689599757239	Rab3a
protein_787	30.8467010182748	30.6129826945229	30.6794258694201	30.8377827430835	Hspa8
protein_791	28.4699127258479	28.435791689237	28.8749038870793	28.7465354890643	Hspd1
protein_793	32.4042340266575	32.1926938516664	31.6700831017534	31.9193299766924	Vamp3
protein_798	27.7228617179164	26.4620451373324	27.7109596288601	27.7607838938569	Mapk1
protein_800	33.5650179440377	33.8313031116817	33.8467010182748	33.5007121458692	Ywhaz
protein_801	27.9501582371301	27.9948557815304	27.0313897480164	27.8630743511939	Hmgb1
protein_803	29.7057131901687	27.5027902943723	4.6001674216506	4.6880594432988	Gng2
protein_808	27.7318860981138	27.3895239493735	27.3799740043934	27.3325333696513	Prkcg
protein_809	28.7448367110903	29.282176312716	28.8440388046325	28.8173564426186	Rala
protein_811	26.9200260421356	27.5930616621484	4.6001674216506	4.6880594432988	Rps10
protein_812	29.8245363150882	29.7076396488322	29.5239321647683	29.7827710318207	Ppp3ca
protein_813	29.0948911806228	29.286346879218	28.9718308884745	29.1407294671261	Phb
protein_818	28.1177323426091	28.7332445985778	28.0949163420798	28.4910986213948	Gnb2l1
protein_819	26.4060532856771	27.0540342275034	27.2943890948584	27.0916416675239	Prkacb
protein_820	31.1559320781706	30.9853587252763	30.4808719378377	30.8553417207226	Ywhaq
protein_821	31.8562697495732	32.2451035389234	31.6091120469695	32.0758762915423	Tuba4a
protein_824	24.3115360248947	26.6668199451106	25.6506150732541	26.5391060244135	Prkcb
protein_825	31.1799705754676	31.4450987926734	31.1800891742626	30.8832903983805	Ywhah
protein_827	26.1706419527031	26.7933999000218	26.7961261756054	26.4692063195818	Kpnb1
protein_838	30.8626754023535	31.5928122366248	30.349631989121	30.5969933196759	Pebp1
protein_840	23.7893505583074	25.6203643763488	22.1844080607085	25.0239451690608	Rock2
protein_843	26.2815353162954	26.9796739437662	26.5587960081469	27.1544117624315	Elavl1
protein_846	28.0862854330665	27.5782352750653	27.3033016599468	27.5102054317959	Idh3g
protein_848	4.85793476612526	4.86410919389486	25.6796540515666	25.5473673843187	Slc9a3r1
protein_852	4.85793476612526	4.86410919389486	25.4811145328222	26.4386337507224	Cct7
protein_853	26.8763099085087	25.3379011471459	27.325773999683	27.7129282828488	Cct2
protein_854	26.5396089581667	26.2377031893598	27.0870951966693	27.6741138031902	Cct4
protein_855	4.85793476612526	4.86410919389486	26.5353580890971	26.1119352693212	Cct5
protein_856	4.85793476612526	4.86410919389486	26.5775871802495	26.5904940808165	Cct6a
protein_857	26.3068687051336	26.6282579588618	26.4223633011761	26.9467048131216	Cct3
protein_860	29.4697769053489	29.6790231069829	30.0894207384659	30.1794960827678	Hpca
protein_861	27.6854538518983	27.1133668498484	4.6001674216506	4.6880594432988	Arf5
protein_862	28.2765745523329	27.8307441998047	4.6001674216506	4.6880594432988	Cplx2
protein_864	27.8580424805802	27.8359322369037	28.3726453040228	28.3270598624268	Ap2m1
protein_866	26.3476482646618	26.1569591940072	4.6001674216506	4.6880594432988	Rpl19
protein_869	29.3330241149133	29.0681752531814	29.1022698123568	29.1164191234449	Nptn
protein_870	29.1812746262939	29.6882416370122	4.6001674216506	4.6880594432988	Csrp1
protein_872	27.2109470005587	27.9544356903761	27.1392662379792	27.3484927361451	Rps3a
protein_877	4.85793476612526	4.86410919389486	24.7022390687286	24.7294635011118	Vps45
protein_878	28.7248467275901	27.5859897885546	28.5212571636343	28.4372213585203	Crmp1
protein_879	27.3277451875586	26.6537613302201	28.3718148564299	26.7979820504476	Slc30a3
protein_884	25.7030052160714	26.1660124077977	27.0084910287165	26.8900632857988	Wbp2
protein_886	27.964330643138	28.4689422987864	27.9167274120719	27.8699131783002	Sirpa
protein_888	27.6052663162356	27.2739988656091	27.2707950507416	27.3569103750606	Fh
protein_893	32.1237072414751	32.4510328285149	32.0548493569836	32.4709455133925	Tubb5
protein_896	30.8751822709382	30.9683603472978	30.1039960779697	30.8516236241311	Prdx5
protein_900	29.4665522665207	26.4213202131104	4.6001674216506	4.6880594432988	Apoa1
protein_904	4.85793476612526	4.86410919389486	25.3753409620879	24.849716243201	Pde1b
protein_908	29.48755723022	28.846372246576	4.6001674216506	4.6880594432988	Nme2
protein_909	27.4820075469314	27.7592605905486	27.466843945945	27.5520083569759	Vcp
protein_910	26.6924548121091	28.1073925364966	27.6486280312556	28.13374138027	Uba1
protein_912	25.9728115515561	26.5949131886903	26.1760180359041	26.6240794609392	Ctnnb1
protein_913	25.5771837742676	27.2336133870948	23.8793282224451	24.9952009342078	Jup
protein_918	31.50932781977	31.8686848737943	31.5655627684554	31.7226500393831	Atp5a1
protein_919	32.34802305989	32.4110709766707	31.9951658834062	32.4160894023002	Ckb
protein_926	28.3591747421061	28.3406200078627	4.6001674216506	4.6880594432988	Fabp5
protein_927	24.3380372119428	27.0204097986213	24.6835142509392	26.9027672147087	Pc
protein_929	30.9234446683276	30.4222189185722	30.2726425625217	30.7483122566019	Atp5i
protein_931	26.1504659538322	26.0450815526154	25.9722637772662	25.802475738896	Anxa7
protein_937	27.2234299389094	26.8711477836389	26.6394798235093	26.7672400488058	Npepps
protein_938	4.85793476612526	4.86410919389486	23.8521477120961	24.1282542922858	Pepd
protein_943	25.4887335533014	24.6597067727431	24.2679233759674	24.5333245036524	Phactr1
protein_944	4.85793476612526	4.86410919389486	25.6703364061244	25.4464167296872	Gsk3a
protein_945	27.3910001879615	26.4797431422766	26.7971162726098	26.8780655105275	Psd3
protein_951	26.5612311831718	26.9624563686246	26.6068199553744	26.0933958023184	Rogdi
protein_956	25.5729700904694	25.6083155172458	25.4955808347615	25.6044464505217	Mat2a
protein_963	28.5467935696816	27.4905249319631	27.8069186098092	28.1234667465659	Slc17a7
protein_970	4.85793476612526	4.86410919389486	24.3839663249236	24.1072528400552	Cmpk2
protein_979	4.85793476612526	4.86410919389486	24.9355305354766	24.9400196020174	Nt5dc3
protein_983	24.293757887276	25.5767802554538	25.2613021315697	25.5047006871262	Agap2
protein_987	27.7758035570829	26.7774349264153	27.9845712650185	27.7143702570227	Camkv
protein_988	25.8265802953967	26.0718359755744	4.6001674216506	4.6880594432988	Pdap1
protein_990	4.85793476612526	4.86410919389486	24.327179817828	23.9140602497567	Rmdn3
protein_992	25.6727388963397	25.4877833732896	26.8972374337661	27.1228745882429	Gpd1l
protein_1018	25.3461777049244	27.743232254597	27.52738548788	27.8810451397108	Oxr1
protein_1021	26.8424211310851	27.7125347669012	27.1848960705103	27.9116510093946	Tmem65
protein_1024	4.85793476612526	4.86410919389486	24.3496910369715	24.5111711315623	Lrrc47
protein_1032	4.85793476612526	4.86410919389486	24.8387476750908	25.1517824228283	Kctd16
protein_1041	29.3345805928992	28.9161579196866	30.5809145756165	29.4055380787347	Cnrip1
protein_1042	26.0986655229432	26.060769144197	25.660414229634	25.9421917794562	Sdr39u1
protein_1044	28.7747358942479	29.3312523783212	28.6744842647143	28.6149492241045	Diras2
protein_1046	27.5534739148436	27.7222754551081	27.5685556305282	27.3173447075936	Cyfip2
protein_1047	4.85793476612526	4.86410919389486	26.4961906217612	27.0894207384659	Tom1l2
protein_1054	4.85793476612526	4.86410919389486	24.008384166375	24.2654216126912	Dnajc11
protein_1057	27.9300461739313	27.4505757171576	27.1583660716007	27.414658786775	Ogdh
protein_1059	27.7803792669549	28.3073899727682	27.9641653638862	28.1594251423847	Myl6
protein_1062	4.85793476612526	4.86410919389486	26.459248867679	26.2370649215068	Flot2
protein_1064	4.85793476612526	4.86410919389486	26.3013142122329	26.3008605510042	Ppp5c
protein_1073	26.9115938695629	25.3469892335864	28.1144098158252	28.1393150362015	Stip1
protein_1077	30.3568893920841	31.5781722786222	31.2136144707458	31.4422832951666	Vdac2
protein_1078	30.704295518564	31.7984224701104	31.1913706692965	31.5035581669288	Vdac3
protein_1079	32.1271253314517	32.9302118828158	32.6957144843876	32.9881385506858	Vdac1
protein_1081	4.85793476612526	4.86410919389486	25.4098609185117	25.6539526201573	Ppp2r5c
protein_1085	4.85793476612526	4.86410919389486	24.5583581157	24.483269141677	Hars
protein_1094	29.6653296275202	30.2745321437229	29.255343934078	29.7444838837276	Prdx2
protein_1105	27.262126969355	27.4995246447396	27.0029236643213	27.4942689192881	Bcan
protein_1106	26.5754247590989	26.4714563002037	26.7686287730828	27.0192435560114	Hras
protein_1111	25.7014725143048	26.2329733068887	25.1157695053981	25.8382186957196	Alcam
protein_1113	29.2548935985015	29.5803934908476	29.3583784255552	29.4738072695107	Snap91
protein_1114	27.6433387731874	27.516831600208	28.4186448576876	28.0908344524849	Fscn1
protein_1117	28.242363096391	27.2318753654042	27.5859181783474	27.6806334825271	Gdi2
protein_1119	28.7557317790683	29.0009109194416	29.1001404097723	29.185935850765	Pacsin1
protein_1122	4.85793476612526	4.86410919389486	24.8490480636677	25.1581926950658	Elavl2
protein_1123	4.85793476612526	4.86410919389486	28.7615766444406	28.149962280401	Cd47
protein_1128	26.0745741585368	27.4328484678312	26.7133216914885	27.1807294393372	Myh10
protein_1129	26.7607838938569	28.7251393667997	27.2826844867573	28.4226600422695	Mog
protein_1131	4.85793476612526	4.86410919389486	26.5551428368098	26.7435532886758	Pcbp2
protein_1132	28.7419152674821	27.8843680472241	28.5263783448426	28.0693794527403	Pea15
protein_1135	4.85793476612526	4.86410919389486	23.7668863418084	23.7825679640406	Pick1
protein_1137	28.2763970663216	27.7212326215116	27.5295466058846	27.4934292776968	Dlg4
protein_1144	28.3305687175853	28.8094354922073	28.5036245071035	28.4670383661381	Sptbn1
protein_1145	28.0497829219743	28.8417315707819	28.8186063607434	29.1103329989503	Syp
protein_1148	27.6116819081467	27.1201079644825	27.4898362033799	27.2724868395963	Tsn
protein_1152	4.85793476612526	4.86410919389486	25.4936888554618	25.2884166485607	Dbnl
protein_1154	29.2735320855038	28.9531038181047	29.0664825509909	29.3457675402479	Sh3gl2
protein_1156	30.9969847040007	31.0518712563084	31.3771525154653	31.5307840643419	Ndufa4
protein_1163	30.2594579900573	29.5555231979167	29.6600163278208	29.9680169547651	Ppp3r1
protein_1164	4.85793476612526	4.86410919389486	26.0458939454348	24.9555335601242	Mapk3
protein_1170	27.3283445801117	28.2105290367255	26.8989677682488	26.6715516484039	Spr
protein_1174	29.9750060396364	29.2548260360391	30.0654813835632	29.9747325947833	Syn2
protein_1176	29.7018690588236	28.9195999194846	28.7849093177969	29.0452586515798	Hspe1
protein_1184	27.0842590333501	26.8764270151317	27.9495461357787	27.7948875980561	Gpd2
protein_1186	25.2002649478623	25.8294624168046	25.6665220047281	25.9332807532771	Srm
protein_1189	29.9033994841047	30.4098326009059	30.2044315925261	30.1938983621814	Cltc
protein_1207	24.262342066894	23.4669994841955	4.6001674216506	4.6880594432988	Tpm4
protein_1224	26.1522661169317	25.3696284946914	26.5006950527874	26.5118346753806	Ppp2r2a
protein_1234	4.85793476612526	4.86410919389486	23.698269729734	23.971233398209	Prmt8
protein_1240	4.85793476612526	4.86410919389486	24.2437980807802	24.4573242621537	Ppp2r5a
protein_1241	4.85793476612526	4.86410919389486	24.874270730106	24.9603587056741	Dync1li2
protein_1247	28.8097727890016	29.2420904696935	29.013371535307	29.008036809089	Mapre3
protein_1257	4.85793476612526	4.86410919389486	27.3471413444032	25.5555231979167	Camk2d
protein_1258	32.0368878352846	31.783122427754	31.7037181601087	31.9023575286586	Atp1a3
protein_1259	28.5967978794888	28.5708007325735	28.1077417184317	28.6966722992056	Atp1a2
protein_1267	4.85793476612526	4.86410919389486	25.2719171954288	23.9882387955086	Kctd12
protein_1275	27.188484865995	27.2237061144597	27.1010927664742	27.2603332416082	Cand1
protein_1280	27.705301219932	27.9536034143069	24.4198264821322	23.4771663355998	Rps9
protein_1289	28.9409773307333	29.0406940238369	29.2726648072818	29.4655601151445	Ppp2r1a
protein_1296	4.85793476612526	4.86410919389486	25.198617394365	25.0232260950682	Nap1l4
protein_1297	4.85793476612526	4.86410919389486	26.0647621679883	26.2529194707488	Mtch1
protein_1298	29.0641454119942	29.2592110281997	28.8432601511965	29.2948710813309	Mtch2
protein_1302	28.3103836121499	29.3721263302984	29.0985099197545	29.139607790878	Ndufa12
protein_1313	28.3766662073674	28.6027203831498	28.7823804914862	28.5934179095367	Actn1
protein_1315	31.1748020686916	31.1580409735043	31.3905390256494	31.0567882897737	Tppp
protein_1316	28.2312802980354	28.6749556236583	28.4682820353326	28.6394798235093	Amph
protein_1318	28.0572403327168	29.0623965034693	29.0784935791865	29.1026953159762	Otub1
protein_1319	26.3014712155809	28.3511495950078	27.7841292886675	28.0127057723251	Map6
protein_1324	26.9821790960276	26.8988524771598	27.2990270048465	27.0498867615426	Ahcyl1
protein_1327	4.85793476612526	4.86410919389486	25.5270423921788	24.3017328498644	Vat1l
protein_1329	28.0633740960379	28.2762195584726	27.7765567260068	28.0727049920129	Cadps
protein_1332	26.9528261898847	26.9429076572378	27.3569103750606	27.3661134017737	Kiaa1045
protein_1334	4.85793476612526	4.86410919389486	23.6963605608966	23.2250567716997	Nisch
protein_1339	25.9272565888229	26.796497541614	26.6190492358459	26.6131583865454	Dnajc6
protein_1349	26.2276404723209	23.9226141624051	26.4167860617149	26.1079711348377	Sept9
protein_1365	4.85793476612526	4.86410919389486	25.2710266758884	25.3107736292848	Rragb
protein_1369	27.999110489541	27.4816996734686	26.6651940677324	27.2671375748809	Bdh1
protein_1372	25.0229299015728	24.8181674884759	4.6001674216506	4.6880594432988	Cnksr2
protein_1379	27.9958263130442	28.3801804901085	28.2733319906457	28.3754652555596	Nfasc
protein_1387	28.0194026446195	27.5085441235307	27.7916002156854	27.6935851122197	Tufm
protein_1392	4.85793476612526	4.86410919389486	25.2063520413853	24.8137224866112	Erlin2
protein_1393	29.6084248017755	28.1404856986378	28.4201317787099	28.4866177821314	Hnrnpa3
protein_1395	4.85793476612526	4.86410919389486	25.5557279662147	25.4205976331746	Psmd11
protein_1398	26.447599479955	25.8717588162776	4.6001674216506	4.6880594432988	Enoph1
protein_1400	25.9296286441837	25.508574346217	26.3866162660763	26.7203847638198	Samm50
protein_1412	4.85793476612526	4.86410919389486	24.2011254207809	24.7323131932609	Coro2b
protein_1415	28.1694477279764	27.1949786280805	28.4974322657784	28.2866112704907	Slc25a12
protein_1416	4.85793476612526	4.86410919389486	26.2750474585928	26.4052743189436	Atl1
protein_1417	27.6386515610959	28.2737321526135	27.964220459074	27.764205456891	Echs1
protein_1421	4.85793476612526	4.86410919389486	25.662507357669	24.9599167035135	Atcay
protein_1431	25.5524188632705	25.6576368304755	24.9628314183747	25.3226144863214	Iars2
protein_1433	26.5238162885007	25.9476191038938	26.336182224463	25.9316361940693	Anks1b
protein_1437	4.85793476612526	4.86410919389486	24.3157565586817	24.2632737858231	Psmd5
protein_1438	27.1703554289113	26.3960898150756	4.6001674216506	4.6880594432988	Tmem11
protein_1442	27.5605608264669	26.5292785050926	27.2162307548073	26.7989708750517	Baiap2
protein_1443	26.4370149382562	25.8876949379181	26.4731143835262	26.6218459703476	Pdhx
protein_1451	4.85793476612526	4.86410919389486	28.286479080911	27.544952880666	Lsamp
protein_1457	4.85793476612526	4.86410919389486	24.8827366981631	25.546072299425	Me3
protein_1458	28.5292487130401	28.5768307014782	28.6563211465523	28.6359218337207	Dlat
protein_1465	4.85793476612526	4.86410919389486	24.1263648141995	25.0609340236304	Kbtbd11
protein_1488	27.9718582903499	28.2264649660925	28.7653125580193	28.5192710898089	Atp6v1h
protein_1491	4.85793476612526	4.86410919389486	26.3156011023684	25.9777103509689	Maob
protein_1493	27.749767255298	27.526191759692	27.4506543702878	27.6877912821715	Aldh5a1
protein_1497	4.85793476612526	4.86410919389486	25.1012531015533	25.7092512863977	Acaa2
protein_1499	4.85793476612526	4.86410919389486	24.0196253392027	24.0072723285436	Etf1
protein_1505	4.85793476612526	4.86410919389486	23.756030950107	24.3677970504402	Tmx3
protein_1507	27.4754510580638	28.2285306481305	27.9297076455667	27.9965807197611	Tnr
protein_1511	26.5496309891915	26.4990835954461	25.9212071641571	25.9840496754345	Dnm3
protein_1516	4.85793476612526	4.86410919389486	23.304520667236	23.8175333260781	Farsa
protein_1517	4.85793476612526	4.86410919389486	25.760910763227	26.0263957865008	Vps26b
protein_1518	4.85793476612526	4.86410919389486	25.4504813277408	25.4305852663175	Tmx4
protein_1519	27.6899916817545	27.3356882937203	26.9002353625194	27.145207471523	Asrgl1
protein_1527	27.4742135562105	27.8330388891484	27.9930207720656	28.0309163797274	Sept11
protein_1533	4.85793476612526	4.86410919389486	24.1153726481786	23.9969685468029	Nadk2
protein_1534	4.85793476612526	4.86410919389486	24.7777108218873	24.7206717868256	Fam126b
protein_1536	4.85793476612526	4.86410919389486	23.9762249730286	24.3556172537533	Pcyox1l
protein_1541	4.85793476612526	4.86410919389486	24.2490897203259	24.1423470459788	Uba3
protein_1543	26.4753273556347	27.9295383515913	27.2190039248306	27.8838438861717	Ank2
protein_1547	26.2992017287223	25.6305926422356	26.4718283725575	26.3831258864233	Pgm2l1
protein_1549	27.0646593936309	27.8335818340363	27.501879693643	27.8830281458199	Immt
protein_1552	4.85793476612526	4.86410919389486	26.150194766912	26.1539674312491	Abi1
protein_1553	4.85793476612526	4.86410919389486	24.7532787843588	24.8377376370152	Dctn4
protein_1555	27.0558967043264	27.6062551892522	26.872322616799	27.6726984380603	Synpo
protein_1559	4.85793476612526	4.86410919389486	25.5587668194517	25.474847908513	Tceal3
protein_1563	24.5562543798496	24.7534318202702	24.8940250495075	24.9363395989846	Nedd4l
protein_1566	4.85793476612526	4.86410919389486	24.047933326016	23.979804754977	Ppm1f
protein_1572	28.4754897128977	28.2330190363224	28.2964911278299	28.3625228407099	Synj1
protein_1574	27.8690306700406	27.8337024607121	27.4155455325604	27.5873497075786	Sept8
protein_1580	27.9884230110748	28.0182355872349	27.8296559664741	27.9258088491932	Pygb
protein_1590	4.85793476612526	4.86410919389486	25.05920184905	25.2215874162568	Acad9
protein_1595	29.7020838082704	29.1433595455767	28.9624287875886	28.8016249877971	Lin7a
protein_1606	26.3942098901641	26.8669104450725	28.2358970723801	28.3960734784561	Phyhip
protein_1607	29.4902380016764	30.5950377253592	30.3537384843649	30.5360291367865	Rtn1
protein_1608	27.1080908158731	26.4716113420128	27.2528653470204	27.2421813509837	Hspa12a
protein_1609	24.6720104736614	24.6704444691214	24.4656301717453	24.6689849352612	Taco1
protein_1610	27.3202747385506	28.1038960609818	28.7419795386561	26.9667525659425	Pdxk
protein_1612	26.4705412142224	26.7034541478395	26.1224006865239	26.4980336599191	Dnm1l
protein_1614	24.6970502744533	26.3499609392296	24.7305522297901	25.5861759584604	Pacs1
protein_1616	4.85793476612526	4.86410919389486	23.8772699023229	23.7072512710632	Arfip2
protein_1618	27.2435438837853	27.2723978475202	27.872850979757	28.1926291909576	Sdha
protein_1625	26.2765568047143	27.3068687051336	26.7617985365648	26.734666418829	Matr3
protein_1627	26.1357092861044	26.0816001358642	25.4631059884419	25.9852229869273	Cbr3
protein_1644	28.7684079290729	28.2030315972285	28.2501565684536	28.2471257429212	Acat1
protein_1647	4.85793476612526	4.86410919389486	27.0091320365948	26.9353956474357	Mapre2
protein_1653	4.85793476612526	4.86410919389486	26.2571348778756	25.6663052821602	Hnrnpl
protein_1654	4.85793476612526	4.86410919389486	26.2280443314774	25.9053175876352	Kiaa0513
protein_1665	30.3200164456413	30.8363536990558	30.9665050558557	30.2068783200141	Syngr3
protein_1668	30.0998646101964	28.6209725730737	4.6001674216506	4.6880594432988	Uqcr10
protein_1670	4.85793476612526	4.86410919389486	26.0418691653494	25.8712418055064	Dync1li1
protein_1674	4.85793476612526	4.86410919389486	25.6456766809193	25.5978422887613	Ap3m2
protein_1679	27.1182275865263	26.5257289243607	27.2352580047989	26.6304815524678	Igsf8
protein_1686	4.85793476612526	4.86410919389486	25.442119135324	25.8102693916455	Cadm4
protein_1696	4.85793476612526	4.86410919389486	27.4659881856972	27.3483238813882	Actr1b
protein_1698	26.3278650859931	25.9038706319929	26.6207279270555	26.9595851130027	Wasf1
protein_1717	26.0250653642161	25.5117442101013	24.8845077913478	25.750265774382	Psmd2
protein_1719	30.5446213070906	30.0490818093296	29.9564311961875	30.2934027116113	Atp1a1
protein_1722	26.6731703807374	27.4986119798091	26.996365215236	27.9804913193094	Sirt2
protein_1728	26.3347510637774	26.2102410356281	26.2515838257468	26.0450607160138	Pdcd10
protein_1730	27.5976860307135	27.2970161578743	27.8350889430476	28.1885320275334	Lgalsl
protein_1731	27.33824128508	26.8259013116019	4.6001674216506	4.6880594432988	Arl8a
protein_1732	4.85793476612526	4.86410919389486	25.0549036825773	25.3390232981305	Epm2aip1
protein_1735	30.0531020866642	31.7858136235443	31.2724200960539	31.4699030248077	Slc25a3
protein_1738	4.85793476612526	4.86410919389486	25.6203084373387	24.0803400158605	Wasf3
protein_1749	28.2649923030494	27.4763012252568	27.9757440819634	28.4516371727843	Acot7
protein_1750	28.5169067229679	28.3571201880422	28.1932404127735	28.4521479656141	Slc12a5
protein_1751	29.3076939586003	29.289362468989	28.9887751224365	28.994343293219	Rab14
protein_1752	28.9326107653829	29.6906245084843	29.4272237631144	29.3114883869707	Sfxn3
protein_1755	4.85793476612526	4.86410919389486	23.7320025911483	24.2411813417783	Eif4a3
protein_1756	28.4923217302589	28.4126818010219	27.955766334219	28.1101338348373	Ndufs1
protein_1761	26.3888345207434	26.3485940395138	4.6001674216506	4.6880594432988	Ppa2
protein_1763	30.5901371106203	31.2606921656157	30.7458305787563	31.027031527312	Atp5c1
protein_1769	4.85793476612526	4.86410919389486	26.6203084373387	26.3822849580422	Smap1
protein_1770	4.85793476612526	4.86410919389486	23.6051249933143	23.5215716867459	Csde1
protein_1773	25.1213931282042	24.755725413053	25.6160226605743	26.245195364222	Acsl6
protein_1774	27.7085279167151	25.7913145421064	27.0018505498409	27.5282056034262	Ndufs2
protein_1777	4.85793476612526	4.86410919389486	24.7115111228162	24.7143964613991	Yars
protein_1778	29.8351793195419	30.2192809488736	29.4785980344628	29.8768075460203	Cisd1
protein_1781	28.1573062227902	29.0446334993477	29.420633770768	29.7398248941233	Ncald
protein_1785	25.8413656701897	26.4421666051501	25.9788233816658	26.0591812153922	Dlg2
protein_1786	4.85793476612526	4.86410919389486	25.4402824365297	25.7743211768372	Pip4k2c
protein_1787	30.8985065486026	29.6354721427688	31.0405503297621	30.1069933679139	Basp1
protein_1796	27.9644408187874	27.8868697470851	27.8849502251267	28.081671238861	Ndufv1
protein_1799	25.4464482822814	26.6042767649464	4.6001674216506	4.6880594432988	Diras1
protein_1801	4.85793476612526	4.86410919389486	24.8447930986547	24.6665490927601	Pcca
protein_1802	25.9569517908021	25.8679709470492	25.7977347383632	26.0040174193939	Ugp2
protein_1806	30.6915399505531	30.6026672950726	30.3334080600148	30.547014294629	Sncb
protein_1807	4.85793476612526	4.86410919389486	25.5672939439175	25.4662527476152	Fdps
protein_1811	4.85793476612526	4.86410919389486	25.1405539579665	25.1510468970653	Ak5
protein_1812	4.85793476612526	4.86410919389486	25.4075937518081	25.7327272254179	Tardbp
protein_1814	4.85793476612526	4.86410919389486	24.8452718108869	24.8192887856834	Etfdh
protein_1816	25.9260351542981	25.6833000661723	24.9577046591658	25.4224916291391	Tf
protein_1820	29.2243273162156	29.7958785451481	29.1742901517441	29.5819920848775	Fam49b
protein_1821	4.85793476612526	4.86410919389486	25.1298662641843	25.1714248275187	Dars
protein_1832	4.85793476612526	4.86410919389486	25.5663651017369	25.339091279237	Pdia6
protein_1833	26.7021333612959	25.4412010782151	25.6755143212057	25.6626160086615	Pde2a
protein_1839	4.85793476612526	4.86410919389486	24.7029788039694	25.5909508738201	Atad3
protein_1843	24.1521306989285	27.3773283737776	26.367930324809	26.803165834938	Myo5a
protein_1848	26.7601493796008	25.7315106676695	26.3838015716442	25.4771972228053	Nptxr
protein_1849	25.7931021762337	26.1087488841581	25.6612844698359	26.1130289658643	Mpst
protein_1852	4.85793476612526	4.86410919389486	25.277816343407	25.3252250159046	Psmd6
protein_1854	26.362338897071	27.7958785451481	27.2341618013338	27.2804737304926	Sfxn1
protein_1855	25.558036910079	25.0406783488151	26.0607485329428	25.9512037731442	Hadhb
protein_1857	26.9834844071693	27.1819617424137	27.6637020687794	27.7270887793667	Actr3
protein_1859	4.85793476612526	4.86410919389486	25.160579606336	25.3617869253957	Pls3
protein_1861	27.8433799713902	27.8150061047812	27.8522191638882	27.6398247925555	Hagh
protein_1865	30.1330799138243	30.2812921052014	29.8014553940994	30.0706082370072	Aco2
protein_1866	26.9251297208074	26.5434491364269	26.3994186232703	26.6168079381183	Dctn2
protein_1882	28.5641276214421	26.9575939678671	27.3287725652348	27.4028373334978	Ndufa10
protein_1883	28.3509810509448	28.2656630432357	28.6308980949973	28.5107336289454	Etfa
protein_1884	4.85793476612526	4.86410919389486	25.6440818133691	25.4282546049424	Gps1
protein_1891	26.8619511021861	27.3605149140937	26.6425127239	26.8222584470094	Park7
protein_1895	4.85793476612526	4.86410919389486	23.675944976445	23.6603598221881	Adrbk1
protein_1897	4.85793476612526	4.86410919389486	23.9640221065501	24.0380844005904	Pccb
protein_1903	27.2345272950443	29.4524425715413	29.0828642306496	29.2456306046435	Rtn4
protein_1907	30.2969067923706	30.5833378407422	30.0454409366316	30.2715298869761	Arhgdia
protein_1911	29.3308251283282	29.6358699534562	29.7782499198333	30.0918181856243	Cox6c
protein_1913	29.8272044360513	28.6731029698064	28.4363081221458	29.3619374840703	Atp5l
protein_1915	28.6624462378896	28.4981173784637	27.9885313621857	28.0738798875701	Glo1
protein_1916	29.310643635288	29.5485400516488	29.1310200765897	29.7754739219963	Mgst3
protein_1917	28.0769912889244	27.9339898132529	27.6217062623108	27.7309797199395	Glod4
protein_1922	25.3065384715238	25.7356221282915	25.4151586559689	25.8587539271505	Lap3
protein_1926	28.412156839558	28.2971911254375	28.2964911278299	28.5018417394701	Ndufc2
protein_1927	26.4911980377023	26.26870874928	25.5677581408498	25.9599167035135	Pgls
protein_1929	29.2729984375316	29.2016769758282	29.0493415204088	29.4452961652766	Uqcrq
protein_1936	28.792872638873	28.9188041536281	28.070352326578	28.3781970062237	Sdhb
protein_1941	28.1163943342314	28.4519122375493	28.0181825167337	27.9467605791501	Rab5a
protein_1948	27.4103786281783	28.1974648611876	28.7101385628537	28.2188653928589	Cotl1
protein_1954	29.9898309411866	29.9082758811711	29.3729773492594	29.6099750450847	Atp5f1
protein_1956	28.9849514719099	29.2881085731706	28.9994600024159	29.3364333829943	Acot13
protein_1963	32.3298847327244	32.4027357030486	32.0655776798582	31.868353714596	Ywhab
protein_1964	27.5655082952714	27.0136111347903	26.2691369545884	26.608371923198	Ykt6
protein_1965	26.3567425027028	26.1335552203818	26.851385339377	27.1353570226328	Arl8b
protein_1968	29.1775252686921	28.9659273671321	28.5769387941625	29.0188722810223	Ndufa6
protein_1976	28.2783038976121	27.8832612615612	27.3829445511688	27.8106003651336	Rpl14
protein_1978	29.7998972829952	29.7003318412976	29.3315086675963	29.5571130453629	Slc25a11
protein_1981	28.6722263409481	29.5553037710551	29.0250653642161	29.2539249007386	Uqcrfs1
protein_1982	26.919457850627	26.8206770112483	26.6496561532847	26.6226839345769	Necap1
protein_1995	28.2970599017545	29.4312550337827	29.2869857418713	29.1530590243662	Arpc2
protein_2001	27.5787391476056	26.8760756667416	27.9261482935399	28.2150273903584	Ddah1
protein_2002	27.9990029300807	27.1423860014134	28.1965740626679	28.1476353524112	Napg
protein_2016	27.8226839221568	27.6094291266755	27.8853576099208	28.1278510177303	Rpl11
protein_2023	25.4402190603637	26.5565028973137	25.6686333453651	25.772384251074	Blvra
protein_2029	25.1537548766463	26.7727869432481	27.9295947851238	27.8933076419283	Cap2
protein_2033	29.1138387611863	28.6287099037679	28.4186448576876	28.7008774930848	Uqcrc1
protein_2034	4.85793476612526	4.86410919389486	26.2376849570536	26.4520065333973	Ola1
protein_2035	25.731199892712	26.1783946583238	26.2183942846293	26.366730412036	Carkd
protein_2036	4.85793476612526	4.86410919389486	25.3979346625799	25.1464704794849	Nsfl1c
protein_2038	4.85793476612526	4.86410919389486	27.5556694639523	27.1757896740499	Scrn1
protein_2042	4.85793476612526	4.86410919389486	23.6734669514199	23.5919496045666	Bcs1l
protein_2043	24.3029880343766	24.8301155428979	24.9000740941803	25.3906066720139	Tomm40l
protein_2046	30.1367508955528	29.5864193751705	29.5030937002705	29.5123547406795	Cs
protein_2047	27.3108602854425	25.8851830305235	27.1637496270108	27.3731018465231	Tomm70a
protein_2048	27.5325221561626	27.8321335266833	27.794205926883	27.8136001776763	Rps19
protein_2051	28.5864551682818	29.9799192050577	29.8146700294427	30.0223426239649	Pdhb
protein_2055	4.85793476612526	4.86410919389486	25.871218300614	25.6248603664687	Hnrnpm
protein_2056	26.67815006911	24.6465283876745	26.5654066064912	26.4092620850285	Pgm1
protein_2058	4.85793476612526	4.86410919389486	24.8760053867944	24.8013906348825	Rars
protein_2064	30.1140870735864	30.3478383138474	29.7641579907092	30.0235328028095	Cyc1
protein_2065	29.24427004212	29.1324181439614	4.6001674216506	4.6880594432988	Dynll2
protein_2069	29.6806837778099	29.7924693091098	29.6231725223697	29.4484110739937	D10Jhu81e
protein_2070	4.85793476612526	4.86410919389486	25.8827833337449	25.8431403210506	Cndp2
protein_2073	30.3883336576607	31.2461518135984	30.3176466033329	30.3109469363954	Rab1b
protein_2074	26.9036867877083	26.8974682649732	26.3366419390522	26.7658499864682	Lrrc57
protein_2080	28.6738443168644	27.4408685341207	28.1131681041474	27.2390881708739	Atp6v1f
protein_2086	26.1100641209017	25.5476321448869	23.8844612114772	25.6409419260155	Lingo1
protein_2091	28.6325283962401	28.2997694352219	28.0745945732141	28.3560708178669	Dlst
protein_2092	29.489032270922	29.3208557285742	29.3770180211141	29.2728427530163	Ube2v1
protein_2097	27.3282589678492	27.5374924949387	27.2520532473419	27.4576373809918	Acp1
protein_2101	29.4352750713976	30.3659882999534	30.8250976366635	30.1789027473529	Atp5d
protein_2103	4.85793476612526	4.86410919389486	24.3143049812476	24.388046198676	Dlgap1
protein_2112	30.0022262307123	30.7190630690209	30.9146334216569	31.0061114683472	Tubb4a
protein_2114	29.1843995474447	29.2347100071824	28.309299677674	28.62665763142	Ndufv2
protein_2117	29.4646646478857	30.0867662850199	29.8613743583777	29.8181949219043	Slc25a22
protein_2118	30.5122040164084	29.6183842139198	30.5627456250282	30.7156308032287	Idh3a
protein_2120	27.8608861642359	25.0961537441565	4.6001674216506	4.6880594432988	Fam162a
protein_2125	27.1312409141605	27.6405834342274	28.910336220361	28.3039983616583	Prps1
protein_2126	4.85793476612526	4.86410919389486	22.9702330074543	23.1916243438656	RtcA
protein_2134	29.8626310678939	29.5310909386246	29.7735888467066	29.7449168870947	Uqcrb
protein_2137	28.5771909789351	28.7433927805662	28.5062756157397	28.6928870902526	Arpc5l
protein_2140	26.3916230354422	25.7514666257131	27.9913456385827	27.6670230510084	Eef1g
protein_2142	4.85793476612526	4.86410919389486	24.3496910369715	24.3238859921029	Snx5
protein_2145	29.0056297314167	29.7073269800186	29.7039656277398	29.2897801922	Efhd2
protein_2151	28.0893702230493	28.5350094660113	27.8485228482774	28.1205035214227	Napa
protein_2153	31.0246559597684	30.9345944898422	29.8307139821826	30.2494333677161	Atp5o
protein_2160	29.0490818093296	28.1649485758381	29.5859897885546	29.3318716661507	Uqcrc2
protein_2161	4.85793476612526	4.86410919389486	25.7218193081594	25.4132550022678	Prkar1a
protein_2163	4.85793476612526	4.86410919389486	26.216452804682	26.4372054810869	Aldh7a1
protein_2164	29.0927004523085	28.8577162836138	28.9065853514414	28.9463143905538	Ap2b1
protein_2167	31.598413906944	32.0440080761057	31.8635618055605	31.5769568088225	Pgam1
protein_2168	28.0950169835197	28.2382227132499	26.4453593188072	26.9157021638652	Cmpk1
protein_2178	4.85793476612526	4.86410919389486	23.2072461353296	23.4062641834733	Pmpca
protein_2180	27.566815084347	28.9155597106396	28.4634178550754	28.8455948518697	Ndufa9
protein_2187	28.7835674064366	29.4821999344873	28.8893671163912	29.4584981075502	Ndufa8
protein_2191	27.4476625327414	27.6369244856378	27.5494400428554	27.6294396696747	Cyb5r3
protein_2194	28.6308286795937	28.9626769979324	28.7690072841805	28.4277033160534	Ndufb10
protein_2196	29.9549071004444	29.8077478243397	29.5203394127092	29.7565114035352	Ndufs3
protein_2199	27.9598061818111	27.9523263244154	27.8023647998081	27.884135110267	Etfb
protein_2200	30.7840200509266	30.6568496094023	29.1091376016445	29.6615461191145	Atp5h
protein_2201	27.8739657776154	27.704048107518	4.6001674216506	4.6880594432988	Apoo
protein_2205	4.85793476612526	4.86410919389486	23.9339110460184	23.9410949027188	Lactb
protein_2213	4.85793476612526	4.86410919389486	25.0375818069463	24.3702606355093	Upf1
protein_2216	4.85793476612526	4.86410919389486	25.6993557674185	26.6177889343469	Aldh6a1
protein_2217	4.85793476612526	4.86410919389486	27.6575823181843	26.943913759744	Dpysl5
protein_2218	27.0359052291389	26.8674997090764	26.6802981358249	26.6733051931508	Vps35
protein_2225	30.2809603876201	30.6590636383496	30.4219180750635	31.02591021896	Tubb3
protein_2231	29.8410866836208	29.7458946757458	28.8389399831477	29.4142958699855	Ndufa13
protein_2235	29.5136729067856	30.6657701088824	29.8191852241039	30.202447864653	Rtn3
protein_2238	25.2763970663216	25.1913683158913	4.6001674216506	4.6880594432988	C1ql2
protein_2247	25.2438707002674	27.6963738277289	26.8891349852498	27.2656183369238	Dync1h1
protein_2253	26.232387842081	25.8771996805296	27.2564691584014	27.793709963648	Lgi1
protein_2258	26.6154053567898	26.2445785487684	27.5772990446302	27.3652791846573	Akr1a1
protein_2260	28.5013482443389	27.9425162055895	27.4966325562235	27.9262048598338	Sv2a
protein_2265	26.9920483507318	26.2934246385674	4.6001674216506	4.6880594432988	Rpl38
protein_2266	4.85793476612526	4.86410919389486	26.4448698066202	26.4197139881581	Lancl2
protein_2268	30.6861220756438	30.6399627570808	30.1778341282869	30.5801957887593	Pfn2
protein_2270	4.85793476612526	4.86410919389486	24.0045318408794	25.0434345331917	Tuba8
protein_2272	4.85793476612526	4.86410919389486	24.2929158473449	24.1010927664742	Sh3glb1
protein_2273	26.8296559664741	26.6596251207736	4.6001674216506	4.6880594432988	Uchl4
protein_2275	27.4140942100921	27.5333393577319	26.1739043082431	26.4604523965988	Scamp5
protein_2287	26.1579422255037	26.0030738366715	25.9545133449842	26.1817532727951	Dclk1
protein_2290	28.018288655784	27.8985642091226	27.4597491574716	27.5820459392213	Auh
protein_2293	29.2503373120069	28.3474793110322	30.0277566156443	28.8085151908466	Arpc3
protein_2298	4.85793476612526	4.86410919389486	24.5289209598514	24.732054362811	Txnrd1
protein_2301	27.8317712225526	28.3089960300253	27.9279573157718	28.2373567361352	Psma6
protein_2302	4.85793476612526	4.86410919389486	26.2195948451638	25.5007558272694	Hapln1
protein_2304	27.5011963657157	27.0674317346929	4.6001674216506	4.6880594432988	Pin1
protein_2306	26.212506329859	26.7423972315096	25.7205413289018	26.5813277159571	Srcin1
protein_2307	4.85793476612526	4.86410919389486	23.9975716261636	23.7221321101787	Homer2
protein_2314	25.7177989838905	27.0925492449045	26.6225443076675	26.932019341095	Plec
protein_2318	26.4247195072495	25.6753258691068	26.2573866916449	27.1175341974308	Ehd3
protein_2320	28.246944596543	28.5694613340176	27.7615449427795	28.3310387691408	Vapb
protein_2321	4.85793476612526	4.86410919389486	24.4646334911938	24.9378665932245	Tomm40
protein_2324	26.2540195463972	27.3248303047397	27.0646593936309	27.4383323448553	Add2
protein_2325	27.04541489732	27.6544443921337	27.3965634965896	27.5346013958238	Add1
protein_2328	28.0243785552484	27.7888653657949	27.1474412722278	27.3936208881206	Ndrg2
protein_2329	4.85793476612526	4.86410919389486	26.1069933679139	25.9888455343974	Dnaja2
protein_2331	28.8490898339561	30.2095533166239	29.2518275829468	29.6994219627908	Map1a
protein_2347	4.85793476612526	4.86410919389486	25.2764680633464	25.9687970245264	H2afy
protein_2352	28.6929203370531	28.6644482611293	28.0578600470909	28.502979930536	Atp2b2
protein_2357	27.5602692698467	28.1339373120994	27.6172985196142	28.0500944182598	Esd
protein_2358	28.54602076632	29.4775948365228	29.8282642504832	29.614633355436	Dstn
protein_2359	30.8846009465774	31.3355924686038	30.5900478542685	30.5563640251844	Uchl1
protein_2360	26.9247900366931	27.1017941009292	27.6784859154325	28.0600785068325	Arpc1a
protein_2363	4.85793476612526	4.86410919389486	24.9107708049551	24.9141058837234	Acot10
protein_2364	29.3844481202929	29.4967658719372	28.3709423716776	28.7699846451215	Ak1
protein_2365	27.4906014370694	27.6591487254919	28.074951783314	28.16341374271	Gda
protein_2366	27.6845178183789	28.0358528046748	27.5985381418025	27.9361261401787	Psma4
protein_2369	27.8440388046325	28.12947326635	27.6851196239248	27.9646060664871	Psma1
protein_2370	27.192817286791	28.3728528412512	28.4419371531867	27.0044246848619	Tagln3
protein_2373	28.253767144175	28.1336434043758	27.8957939013561	28.0124926632674	Sept6
protein_2374	27.4025934083909	26.329491294542	26.1189800318357	25.8530763094825	Adam22
protein_2377	4.85793476612526	4.86410919389486	26.2108912790433	26.7329859351901	Hebp1
protein_2381	26.6761333476956	27.1555702435223	27.0744924969385	26.7088567660796	Ak3
protein_2382	28.82022050552	29.7007121658508	30.0602073821768	29.0278884107424	Atp6v1g2
protein_2389	25.3675971157997	27.5016519536271	25.8495492273278	26.4094886999039	Pfkp
protein_2390	25.4609522692846	25.3630912455447	25.4076909892043	25.403048701902	Pygm
protein_2396	28.6587062175424	28.8281431682304	28.3706514261331	29.157185736145	Suclg1
protein_2399	27.8812202205194	27.5322248771505	27.5235770306315	27.494345226116	Ak4
protein_2402	26.9119366746117	25.2902461406394	26.3094037707287	26.6674968536018	Mpp2
protein_2404	28.1808242692608	28.2069481655778	27.5840550642423	27.9898309411866	Vapa
protein_2406	4.85793476612526	4.86410919389486	25.7805920289145	26.2647597069749	Dmtn
protein_2409	26.1492645959959	27.7365384980315	26.8812202205194	27.9105077825502	Epb41l3
protein_2410	28.1319767953501	27.2264649660925	4.6001674216506	4.6880594432988	Timm9
protein_2413	4.85793476612526	4.86410919389486	25.3292004234309	25.0443103978595	Psmd13
protein_2415	4.85793476612526	4.86410919389486	25.1750091648677	24.758727054175	Cyp46a1
protein_2418	28.1446727889661	27.0264380020429	28.1414605255548	28.0357479500311	Ncdn
protein_2422	27.2166008189471	26.0850294005703	27.0798926118043	26.7212978206999	Palm
protein_2425	4.85793476612526	4.86410919389486	25.7339169064254	25.8823868832394	Bpnt1
protein_2427	27.1027954162393	26.7611644685017	4.6001674216506	4.6880594432988	Dctn3
protein_2433	26.3826972390844	27.275509308592	26.4596553663494	27.5023350658518	Plcb1
protein_2434	27.6203084373387	27.6392037888695	28.283921032111	27.8214071200902	Atp6v1c1
protein_2435	29.2832808105811	28.6455736177772	28.7480082804013	28.5973663592561	Atp6v0a1
protein_2439	27.4866177821314	27.0414514469126	4.6001674216506	4.6880594432988	Ndufa7
protein_2443	28.6345723401378	27.9121651660662	28.1735040652161	28.0159517909747	Sept3
protein_2447	4.85793476612526	4.86410919389486	24.7959033101066	24.6439442422048	Strap
protein_2450	25.7080410820508	27.4514406658386	26.2314542661933	26.6229631478623	Dpp6
protein_2456	4.85793476612526	4.86410919389486	24.5269528755318	24.3396689893439	Mecp2
protein_2458	26.5183032937436	27.0650704471392	26.6131583865454	27.1742663372322	Epb41l1
protein_2462	27.6621406001466	27.9351708060044	28.2097392189553	28.2579980564465	Sucla2
protein_2463	29.4801015246076	28.1449644585622	29.44349907864	29.1884612846477	Sept5
protein_2464	27.2267405613127	28.151463095861	27.4172368988872	27.7587524651437	Psma8
protein_2465	27.7023976153567	28.7597685370518	28.5966557245394	28.4598663878004	Psma5
protein_2469	27.372437736935	25.7909169890899	27.5386769129155	27.7829428360814	Homer1

## Sheet: Feature Meta Data
ID	Protein_IDs	Majority_protein_IDs	Peptide_counts__all_	Peptide_counts__razor_unique_	Peptide_counts__unique_	Protein_names	Gene_names	Fasta_headers	Number_of_proteins	Peptides	Razor___unique_peptides	Unique_peptides	Peptides_Cx6_1	Peptides_Cx6_2	Peptides_Cx24_1	Peptides_Cx24_2	Razor___unique_peptides_Cx6_1	Razor___unique_peptides_Cx6_2	Razor___unique_peptides_Cx24_1	Razor___unique_peptides_Cx24_2	Unique_peptides_Cx6_1	Unique_peptides_Cx6_2	Unique_peptides_Cx24_1	Unique_peptides_Cx24_2	Sequence_coverage____	Unique___razor_sequence_coverage____	Unique_sequence_coverage____	Mol__weight__kDa_	Sequence_length	Sequence_lengths	Fraction_average	Fraction_1	Fraction_2	Fraction_3	Fraction_4	Q_value	Score	Sequence_coverage_Cx6_1____	Sequence_coverage_Cx6_2____	Sequence_coverage_Cx24_1____	Sequence_coverage_Cx24_2____	Intensity	Intensity_Cx6_1	Intensity_Cx6_2	Intensity_Cx24_1	Intensity_Cx24_2	LFQ_intensity_Cx6_1	LFQ_intensity_Cx6_2	LFQ_intensity_Cx24_1
protein_1	A0A1W2P872;Q9JKN6	A0A1W2P872;Q9JKN6	5;3	5;3	5;3	RNA-binding protein Nova-1	Nova1	sp|A0A1W2P872|NOVA2_MOUSE RNA-binding protein Nova-2 OS=Mus musculus OX=10090 GN=Nova2 PE=1 SV=1;sp|Q9JKN6|NOVA1_MOUSE RNA-binding protein Nova-1 OS=Mus musculus OX=10090 GN=Nova1 PE=1 SV=2	2	5	5	5	0	0	4	4	0	0	4	4	0	0	4	4	13.8	13.8	13.8	49.066	492	492;507	2		8			0	31.817	0	0	10.2	11.8	122690000	0	0	57789000	64905000	0	0	32261000
protein_12	A2ALU4;Q9QXN0;Q1W617	A2ALU4;Q9QXN0;Q1W617	2;1;1	2;1;1	2;1;1	Protein Shroom2;Protein Shroom3;Protein Shroom4	Shroom2;Shroom3;Shroom4	sp|A2ALU4|SHRM2_MOUSE Protein Shroom2 OS=Mus musculus OX=10090 GN=Shroom2 PE=1 SV=1;sp|Q9QXN0|SHRM3_MOUSE Protein Shroom3 OS=Mus musculus OX=10090 GN=Shroom3 PE=1 SV=2;sp|Q1W617|SHRM4_MOUSE Protein Shroom4 OS=Mus musculus OX=10090 GN=Shroom4 PE=1 SV=1	3	2	2	2	0	0	2	2	0	0	2	2	0	0	2	2	1.5	1.5	1.5	164.7	1481	1481;1986;1475	2		4			0.0010823	12.797	0	0	1.5	1.5	29775000	0	0	11283000	18492000	0	0	8588600
protein_27	B1AWN6;A2ASI5;Q62205;Q9ER60	B1AWN6;A2ASI5	12;6;2;2	12;6;2;2	8;2;1;1	Sodium channel protein	Scn2a1;Scn3a	sp|B1AWN6|SCN2A_MOUSE Sodium channel protein type 2 subunit alpha OS=Mus musculus OX=10090 GN=Scn2a PE=1 SV=1;sp|A2ASI5|SCN3A_MOUSE Sodium channel protein type 3 subunit alpha OS=Mus musculus OX=10090 GN=Scn3a PE=1 SV=1	4	12	12	8	3	12	4	3	3	12	4	3	2	8	4	3	7.4	7.4	5.1	227.94	2006	2006;1947;1984;1841	1.27	19		3		0	75.408	1.6	7.4	2.1	1.6	305040000	25857000	216190000	33239000	29755000	43672000	31916000	37186000
protein_30	B2RSH2;P20612;P50149;Q3V3I2	B2RSH2	8;2;2;2	6;1;1;1	5;0;0;0	Guanine nucleotide-binding protein G(i) subunit alpha-1	Gnai1	sp|B2RSH2|GNAI1_MOUSE Guanine nucleotide-binding protein G(i) subunit alpha-1 OS=Mus musculus OX=10090 GN=Gnai1 PE=1 SV=1	4	8	6	5	4	5	7	8	2	3	5	6	1	2	4	5	25.1	18.6	16.4	40.361	354	354;350;354;354	2.41		16	11		0	49.21	13.3	17.5	20.9	25.1	604860000	13384000	30971000	339600000	220910000	44776000	80358000	131870000
protein_34	B9EKR1	B9EKR1	10	10	10	Receptor-type tyrosine-protein phosphatase zeta	Ptprz1	sp|B9EKR1|PTPRZ_MOUSE Receptor-type tyrosine-protein phosphatase zeta OS=Mus musculus OX=10090 GN=Ptprz1 PE=1 SV=1	1	10	10	10	3	9	4	4	3	9	4	4	3	9	4	4	4.7	4.7	4.7	254.4	2312	2312	1.33	19	7	1		0	99.132	1.4	4.4	1.8	2	1730500000	122470000	838200000	267860000	502000000	176650000	237360000	142670000
protein_35	Q8CGP5;Q8R1M2;Q8CGP7;Q8BFU2;Q8CGP6;C0HKE9;C0HKE8;C0HKE7;C0HKE6;C0HKE5;C0HKE4;C0HKE3;C0HKE2;C0HKE1;Q6GSS7;Q64523	Q8CGP5;Q8R1M2;Q8CGP7;Q8BFU2;Q8CGP6;C0HKE9;C0HKE8;C0HKE7;C0HKE6;C0HKE5;C0HKE4;C0HKE3;C0HKE2;C0HKE1;Q6GSS7;Q64523	4;4;4;4;4;4;4;4;4;4;4;4;4;4;3;3	4;4;4;4;4;4;4;4;4;4;4;4;4;4;3;3	2;2;2;2;2;2;2;2;2;2;2;2;2;2;1;1	Histone H2A type 1-F;Histone H2A.J;Histone H2A type 1-K;Histone H2A type 3;Histone H2A type 1-H;Histone H2A type 2-A;Histone H2A type 2-C	Hist1h2af;H2afj;Hist1h2ak;Hist3h2a;Hist1h2ah;Hist2h2aa1;Hist2h2ac	sp|Q8CGP5|H2A1F_MOUSE Histone H2A type 1-F OS=Mus musculus OX=10090 GN=Hist1h2af PE=1 SV=3;sp|Q8R1M2|H2AJ_MOUSE Histone H2A.J OS=Mus musculus OX=10090 GN=H2aj PE=1 SV=1;sp|Q8CGP7|H2A1K_MOUSE Histone H2A type 1-K OS=Mus musculus OX=10090 GN=H2ac15 PE=1 SV=3	16	4	4	2	3	4	3	3	3	4	3	3	1	2	1	1	35.4	35.4	23.1	14.161	130	130;129;130;130;128;130;130;130;130;130;130;130;130;130;130;129	3.27	3	2	9	16	0	323.31	26.9	35.4	26.9	26.9	12411000000	3608800000	5770600000	1187500000	1844100000	5078600000	4301800000	2681100000
protein_82	D3Z7P3	D3Z7P3	12	12	12	Glutaminase kidney isoform, mitochondrial	Gls	sp|D3Z7P3|GLSK_MOUSE Glutaminase kidney isoform, mitochondrial OS=Mus musculus OX=10090 GN=Gls PE=1 SV=1	1	12	12	12	4	3	7	12	4	3	7	12	4	3	7	12	25.1	25.1	25.1	73.963	674	674	2.09	2	27	3	1	0	123.19	6.2	4.7	14.2	25.1	2232900000	201800000	82616000	813870000	1134600000	369760000	335050000	382100000
protein_90	E9Q401;A2AGL3	E9Q401	18;2	18;2	16;1	Ryanodine receptor 2	Ryr2	sp|E9Q401|RYR2_MOUSE Ryanodine receptor 2 OS=Mus musculus OX=10090 GN=Ryr2 PE=1 SV=1	2	18	18	16	2	14	5	11	2	14	5	11	2	13	5	9	4	4	3.7	564.81	4966	4966;4863	1	32				0	114.29	0.4	3.2	1	2.4	326700000	11577000	183540000	31546000	100030000	26755000	30455000	21884000
protein_97	E9Q912	E9Q912	18	18	18		Rap1gds1	sp|E9Q912|GDS1_MOUSE Rap1 GTPase-GDP dissociation stimulator 1 OS=Mus musculus OX=10090 GN=Rap1gds1 PE=2 SV=1	1	18	18	18	5	7	16	14	5	7	16	14	5	7	16	14	37.9	37.9	37.9	66.076	607	607	2.24	5	40	16	2	0	207.5	9.9	13	31	28.5	2614700000	139040000	117340000	1210100000	1148200000	125600000	118410000	225220000
protein_98	F6SEU4;Q3UHC7	F6SEU4	25;1	25;1	25;1	Ras/Rap GTPase-activating protein SynGAP	Syngap1	sp|F6SEU4|SYGP1_MOUSE Ras/Rap GTPase-activating protein SynGAP OS=Mus musculus OX=10090 GN=Syngap1 PE=1 SV=2	2	25	25	25	7	22	11	17	7	22	11	17	7	22	11	17	23.7	23.7	23.7	148.24	1340	1340;1189	1.35	56	13	5	1	0	306.75	5.7	22.5	9.9	15.5	2856500000	123890000	1410000000	370190000	952370000	129060000	197160000	143950000
protein_102	G5E829	G5E829	30	30	14	Plasma membrane calcium-transporting ATPase 1	Atp2b1	sp|G5E829|AT2B1_MOUSE Plasma membrane calcium-transporting ATPase 1 OS=Mus musculus OX=10090 GN=Atp2b1 PE=1 SV=1	1	30	30	14	16	28	17	24	16	28	17	24	6	13	8	12	26.3	26.3	14.3	134.75	1220	1220	1.22	107	11	7	1	0	323.31	15.7	26.2	17.2	23.3	11783000000	725990000	5955800000	1535400000	3566200000	679180000	606120000	508280000
protein_108	O08547	O08547	7	7	7	Vesicle-trafficking protein SEC22b	Sec22b	sp|O08547|SC22B_MOUSE Vesicle-trafficking protein SEC22b OS=Mus musculus OX=10090 GN=Sec22b PE=1 SV=3	1	7	7	7	3	7	4	2	3	7	4	2	3	7	4	2	29.8	29.8	29.8	24.74	215	215	3.05			21	1	0	58.872	14	29.8	21.4	8.4	437060000	60877000	213190000	148970000	14021000	102980000	165510000	111000000
protein_109	O08553	O08553	31	31	26	Dihydropyrimidinase-related protein 2	Dpysl2	sp|O08553|DPYL2_MOUSE Dihydropyrimidinase-related protein 2 OS=Mus musculus OX=10090 GN=Dpysl2 PE=1 SV=2	1	31	31	26	18	24	29	30	18	24	29	30	16	20	25	26	71	71	59.8	62.277	572	572	2.25	55	144	77	27	0	323.31	45.1	58.6	66.6	69.6	87932000000	12538000000	10202000000	29559000000	35633000000	6229400000	5598600000	5125100000
protein_113	O08585	O08585	5	5	5	Clathrin light chain A	Clta	sp|O08585|CLCA_MOUSE Clathrin light chain A OS=Mus musculus OX=10090 GN=Clta PE=1 SV=2	1	5	5	5	3	4	3	4	3	4	3	4	3	4	3	4	14.9	14.9	14.9	25.604	235	235	2.68		9	11	2	0	31.463	10.6	14.9	10.6	14.5	729280000	105150000	127760000	313450000	182920000	136410000	87647000	171280000
protein_115	O08599	O08599	35	35	35	Syntaxin-binding protein 1	Stxbp1	sp|O08599|STXB1_MOUSE Syntaxin-binding protein 1 OS=Mus musculus OX=10090 GN=Stxbp1 PE=1 SV=2	1	35	35	35	23	26	30	34	23	26	30	34	23	26	30	34	64	64	64	67.568	594	594	2.45	27	132	88	32	0	323.31	43.8	42.8	50	64	49274000000	8340700000	4496100000	18302000000	18135000000	1914000000	1365900000	1984400000
protein_118	O08709	O08709	14	14	14	Peroxiredoxin-6	Prdx6	sp|O08709|PRDX6_MOUSE Peroxiredoxin-6 OS=Mus musculus OX=10090 GN=Prdx6 PE=1 SV=3	1	14	14	14	11	11	11	8	11	11	11	8	11	11	11	8	75.9	75.9	75.9	24.87	224	224	3.16			51	10	0	233.14	62.1	57.6	66.5	37.9	6859600000	1691100000	2715500000	1579500000	873580000	935440000	1117500000	768250000
protein_119	O08749	O08749	14	14	14	Dihydrolipoyl dehydrogenase, mitochondrial	Dld	sp|O08749|DLDH_MOUSE Dihydrolipoyl dehydrogenase, mitochondrial OS=Mus musculus OX=10090 GN=Dld PE=1 SV=2	1	14	14	14	9	8	12	12	9	8	12	12	9	8	12	12	33.4	33.4	33.4	54.272	509	509	2.39	10	36	19	10	0	323.31	19.6	17.3	26.1	30.6	4431900000	650230000	381250000	1592500000	1807900000	575380000	429160000	524430000
protein_120	O08756	O08756	5	5	5	3-hydroxyacyl-CoA dehydrogenase type-2	Hsd17b10	sp|O08756|HCD2_MOUSE 3-hydroxyacyl-CoA dehydrogenase type-2 OS=Mus musculus OX=10090 GN=Hsd17b10 PE=1 SV=4	1	5	5	5	3	4	4	5	3	4	4	5	3	4	4	5	23.4	23.4	23.4	27.418	261	261	3.05			19	1	0	72.579	15.7	18.8	18.8	23.4	590540000	135530000	189860000	147630000	117520000	204450000	220680000	134630000
protein_128	O08917	O08917	14	14	14	Flotillin-1	Flot1	sp|O08917|FLOT1_MOUSE Flotillin-1 OS=Mus musculus OX=10090 GN=Flot1 PE=1 SV=1	1	14	14	14	2	3	12	12	2	3	12	12	2	3	12	12	37.1	37.1	37.1	47.513	428	428	2.09		31	3		0	120.22	5.8	7.7	32.5	30.8	926800000	22012000	22086000	554680000	328020000	36450000	36835000	173370000
protein_131	O09061	O09061	5	5	5	Proteasome subunit beta type-1	Psmb1	sp|O09061|PSB1_MOUSE Proteasome subunit beta type-1 OS=Mus musculus OX=10090 GN=Psmb1 PE=1 SV=1	1	5	5	5	3	4	3	2	3	4	3	2	3	4	3	2	23.3	23.3	23.3	26.372	240	240	3.2			12	3	0	32.125	13.3	17.5	11.7	7.5	517260000	117010000	259690000	98640000	41923000	118550000	210370000	125110000
protein_140	O35129	O35129	13	13	13	Prohibitin-2	Phb2	sp|O35129|PHB2_MOUSE Prohibitin-2 OS=Mus musculus OX=10090 GN=Phb2 PE=1 SV=1	1	13	13	13	8	13	11	10	8	13	11	10	8	13	11	10	52.5	52.5	52.5	33.296	299	299	2.84	5	2	54	2	0	184.73	29.8	52.5	41.8	37.8	5173800000	893870000	1953700000	1712100000	614190000	583770000	1156400000	997560000
protein_144	O35215	O35215	4	4	4	D-dopachrome decarboxylase	Ddt	sp|O35215|DOPD_MOUSE D-dopachrome decarboxylase OS=Mus musculus OX=10090 GN=Ddt PE=1 SV=3	1	4	4	4	3	4	2	2	3	4	2	2	3	4	2	2	37.3	37.3	37.3	13.077	118	118	4				14	0	44.201	30.5	37.3	16.9	17.8	672150000	195950000	348960000	76881000	50365000	283460000	206840000	306990000
protein_145	O35239	O35239	4	4	4	Tyrosine-protein phosphatase non-receptor type 9	Ptpn9	sp|O35239|PTN9_MOUSE Tyrosine-protein phosphatase non-receptor type 9 OS=Mus musculus OX=10090 GN=Ptpn9 PE=1 SV=2	1	4	4	4	0	0	3	3	0	0	3	3	0	0	3	3	7.3	7.3	7.3	67.969	593	593	2		6			0.0007657	24.661	0	0	5.9	5.1	46884000	0	0	22212000	24671000	0	0	11463000
protein_154	O35405	O35405	4	4	4	Phospholipase D3	Pld3	sp|O35405|PLD3_MOUSE 5-3 exonuclease PLD3 OS=Mus musculus OX=10090 GN=Pld3 PE=1 SV=1	1	4	4	4	3	2	3	3	3	2	3	3	3	2	3	3	8.6	8.6	8.6	54.388	488	488	2.92		6	1	5	0	28.385	6.4	4.3	6.4	6.1	319890000	64783000	31661000	126250000	97193000	95546000	41050000	61092000
protein_157	O35526	O35526	16	15	15	Syntaxin-1A	Stx1a	sp|O35526|STX1A_MOUSE Syntaxin-1A OS=Mus musculus OX=10090 GN=Stx1a PE=1 SV=3	1	16	15	15	7	15	12	11	7	14	11	11	7	14	11	11	49.7	47.2	47.2	33.054	288	288	2.96		6	72	3	0	323.31	25.7	49.7	45.1	36.5	14594000000	2091400000	5613100000	4867100000	2022300000	1559400000	2731000000	2909500000
protein_163	O35639	O35639	5	5	5	Annexin A3	Anxa3	sp|O35639|ANXA3_MOUSE Annexin A3 OS=Mus musculus OX=10090 GN=Anxa3 PE=1 SV=4	1	5	5	5	0	0	4	3	0	0	4	3	0	0	4	3	14.2	14.2	14.2	36.384	323	323	3			7		0	30.56	0	0	11.8	8	44876000	0	0	32753000	12123000	0	0	25317000
protein_164	O35643	O35643	26	13	13	AP-1 complex subunit beta-1	Ap1b1	sp|O35643|AP1B1_MOUSE AP-1 complex subunit beta-1 OS=Mus musculus OX=10090 GN=Ap1b1 PE=1 SV=2	1	26	13	13	10	22	15	24	3	9	4	11	3	9	4	11	31.5	18.1	18.1	103.93	943	943	1.46	23	8	4		0	97.929	11.5	23.4	18.7	30	1054500000	27067000	496670000	114310000	416410000	62238000	114130000	74312000
protein_169	O35737;P70333	O35737;P70333	5;3	5;3	3;2	Heterogeneous nuclear ribonucleoprotein H;Heterogeneous nuclear ribonucleoprotein H, N-terminally processed;Heterogeneous nuclear ribonucleoprotein H2	Hnrnph1;Hnrnph2	sp|O35737|HNRH1_MOUSE Heterogeneous nuclear ribonucleoprotein H OS=Mus musculus OX=10090 GN=Hnrnph1 PE=1 SV=3;sp|P70333|HNRH2_MOUSE Heterogeneous nuclear ribonucleoprotein H2 OS=Mus musculus OX=10090 GN=Hnrnph2 PE=1 SV=1	2	5	5	3	2	2	4	5	2	2	4	5	1	1	2	3	17.8	17.8	11.8	49.199	449	449;449	2.37		12	7		0	43.359	5.8	5.8	14	17.8	702450000	59625000	79069000	218090000	345660000	181920000	192460000	115020000
protein_181	O54829	O54829	9	9	7	Regulator of G-protein signaling 7	Rgs7	sp|O54829|RGS7_MOUSE Regulator of G-protein signaling 7 OS=Mus musculus OX=10090 GN=Rgs7 PE=1 SV=2	1	9	9	7	4	2	7	9	4	2	7	9	3	1	6	7	16.8	16.8	11.7	54.791	469	469	2.36		19	3	3	0	75.004	9.8	4.9	13.9	16.8	712800000	97492000	33578000	244840000	336890000	146520000	84806000	101100000
protein_183	O54865	O54865	10	10	10	Guanylate cyclase soluble subunit beta-1	Gucy1b3	sp|O54865|GCYB1_MOUSE Guanylate cyclase soluble subunit beta-1 OS=Mus musculus OX=10090 GN=Gucy1b1 PE=1 SV=1	1	10	10	10	0	1	8	9	0	1	8	9	0	1	8	9	17.6	17.6	17.6	70.597	620	620	1.89	2	16			0	66.717	0	1.8	14.4	16.3	260310000	0	8632500	135260000	116420000	0	0	38165000
protein_184	O54901	O54901	3	3	3	OX-2 membrane glycoprotein	Cd200	sp|O54901|OX2G_MOUSE OX-2 membrane glycoprotein OS=Mus musculus OX=10090 GN=Cd200 PE=1 SV=1	1	3	3	3	0	0	3	3	0	0	3	3	0	0	3	3	12.6	12.6	12.6	31.256	278	278	2		6			0	35.708	0	0	12.6	12.6	126130000	0	0	44723000	81406000	0	0	38767000
protein_186	O54983	O54983	10	10	10	Ketimine reductase mu-crystallin	Crym	sp|O54983|CRYM_MOUSE Ketimine reductase mu-crystallin OS=Mus musculus OX=10090 GN=Crym PE=1 SV=1	1	10	10	10	3	9	10	8	3	9	10	8	3	9	10	8	33.5	33.5	33.5	33.523	313	313	3		1	32	1	0	300.03	10.5	30	33.5	27.2	1784400000	65735000	407750000	1131200000	179680000	127440000	240610000	537860000
protein_191	O55022	O55022	8	8	8	Membrane-associated progesterone receptor component 1	Pgrmc1	sp|O55022|PGRC1_MOUSE Membrane-associated progesterone receptor component 1 OS=Mus musculus OX=10090 GN=Pgrmc1 PE=1 SV=4	1	8	8	8	4	8	6	4	4	8	6	4	4	8	6	4	27.2	27.2	27.2	21.694	195	195	3.12			22	3	0	55.938	22.1	27.2	26.7	19	919430000	241880000	373170000	241370000	63005000	265910000	291720000	255530000
protein_192	O55023	O55023	9	9	9	Inositol monophosphatase 1	Impa1	sp|O55023|IMPA1_MOUSE Inositol monophosphatase 1 OS=Mus musculus OX=10090 GN=Impa1 PE=1 SV=1	1	9	9	9	5	8	6	6	5	8	6	6	5	8	6	6	28.9	28.9	28.9	30.436	277	277	3.11			25	3	0	97.67	15.5	24.5	19.9	20.2	1574300000	306840000	626910000	381470000	259050000	378040000	403730000	290960000
protein_193	O55026	O55026	2	2	2	Ectonucleoside triphosphate diphosphohydrolase 2	Entpd2	sp|O55026|ENTP2_MOUSE Ectonucleoside triphosphate diphosphohydrolase 2 OS=Mus musculus OX=10090 GN=Entpd2 PE=1 SV=2	1	2	2	2	0	0	2	2	0	0	2	2	0	0	2	2	4.2	4.2	4.2	54.319	495	495	2		4			0.0011192	13.557	0	0	4.2	4.2	29914000	0	0	12352000	17562000	0	0	11237000
protein_196	O55042	O55042	8	8	6	Alpha-synuclein	Snca	sp|O55042|SYUA_MOUSE Alpha-synuclein OS=Mus musculus OX=10090 GN=Snca PE=1 SV=2	1	8	8	6	7	7	6	7	7	7	6	7	5	5	4	5	46.4	46.4	38.6	14.485	140	140	3.88			5	38	0	323.31	45.7	46.4	44.3	45.7	8179100000	2400300000	3247300000	1696200000	835280000	1499800000	1332300000	3272200000
protein_199	O55100	O55100	3	3	3	Synaptogyrin-1	Syngr1	sp|O55100|SNG1_MOUSE Synaptogyrin-1 OS=Mus musculus OX=10090 GN=Syngr1 PE=1 SV=2	1	3	3	3	2	3	2	2	2	3	2	2	2	3	2	2	14.5	14.5	14.5	25.652	234	234	2.86	4	2	9	7	0	234.94	10.3	14.5	10.3	10.3	3387800000	615220000	1416000000	695640000	660970000	855630000	1715200000	1174000000
protein_202	O55126	O55126	4	4	4	Protein NipSnap homolog 2	Gbas	sp|O55126|NIPS2_MOUSE Protein NipSnap homolog 2 OS=Mus musculus OX=10090 GN=Nipsnap2 PE=1 SV=1	1	4	4	4	2	4	3	2	2	4	3	2	2	4	3	2	14.6	14.6	14.6	32.932	281	281	3			12		0	155.9	8.9	14.6	12.1	7.1	1075200000	142520000	481970000	280150000	170510000	446190000	510810000	360320000
protein_203	O55131;Q8C650;Q9DA97	O55131	13;1;1	13;1;1	13;1;1	Septin-7	Sept7	sp|O55131|SEPT7_MOUSE Septin-7 OS=Mus musculus OX=10090 GN=Septin7 PE=1 SV=1	3	13	13	13	6	4	13	13	6	4	13	13	6	4	13	13	32.6	32.6	32.6	50.549	436	436;452;430	2.2	10	45	15	5	0	126.53	18.8	9.6	32.6	32.6	8500100000	1054000000	422660000	3158500000	3865000000	772830000	784530000	913590000
protein_207	O55143;Q8R429;Q64518	O55143	27;12;3	27;12;3	27;12;3	Sarcoplasmic/endoplasmic reticulum calcium ATPase 2	Atp2a2	sp|O55143|AT2A2_MOUSE Sarcoplasmic/endoplasmic reticulum calcium ATPase 2 OS=Mus musculus OX=10090 GN=Atp2a2 PE=1 SV=2	3	27	27	27	6	24	11	22	6	24	11	22	6	24	11	22	28.5	28.5	28.5	114.86	1044	1044;994;999	1.21	72	6	6		0	259.69	6	26.2	10.3	20	4718200000	147990000	2234000000	464760000	1871400000	296980000	378070000	286860000
protein_209	O55234	O55234	10	10	10	Proteasome subunit beta type-5	Psmb5	sp|O55234|PSB5_MOUSE Proteasome subunit beta type-5 OS=Mus musculus OX=10090 GN=Psmb5 PE=1 SV=3	1	10	10	10	9	9	5	7	9	9	5	7	9	9	5	7	35.2	35.2	35.2	28.532	264	264	3.37			26	15	0	113.93	34.8	35.2	23.5	31.1	1198600000	377520000	550970000	146420000	123700000	224710000	277780000	161880000
protein_211	O70161;P70182;P70181	O70161	14;3;2	14;3;2	14;3;2	Phosphatidylinositol 4-phosphate 5-kinase type-1 gamma	Pip5k1c	sp|O70161|PI51C_MOUSE Phosphatidylinositol 4-phosphate 5-kinase type-1 gamma OS=Mus musculus OX=10090 GN=Pip5k1c PE=1 SV=2	3	14	14	14	2	10	3	10	2	10	3	10	2	10	3	10	27.5	27.5	27.5	72.407	661	661;546;539	1.27	25	2	3		0	96.903	5.3	26.2	6.1	21.3	839520000	20433000	524420000	28845000	265820000	35210000	142360000	17663000
protein_212	O70172	O70172	5	5	3	Phosphatidylinositol 5-phosphate 4-kinase type-2 alpha	Pip4k2a	sp|O70172|PI42A_MOUSE Phosphatidylinositol 5-phosphate 4-kinase type-2 alpha OS=Mus musculus OX=10090 GN=Pip4k2a PE=1 SV=1	1	5	5	3	1	1	4	3	1	1	4	3	0	0	2	2	16.3	16.3	9.9	46.151	405	405	2.27		8	3		0	31.747	2.2	2.2	12.6	9.4	363630000	26254000	7621300	178960000	150790000	0	0	87394000
protein_214	O70251	O70251	3	3	3	Elongation factor 1-beta	Eef1b	sp|O70251|EF1B_MOUSE Elongation factor 1-beta OS=Mus musculus OX=10090 GN=Eef1b PE=1 SV=5	1	3	3	3	3	3	2	2	3	3	2	2	3	3	2	2	16.4	16.4	16.4	24.693	225	225	3.17			10	2	0.0014055	21.282	16.4	16.4	9.8	10.7	894620000	220470000	457870000	107410000	108880000	366740000	475840000	254100000
protein_221	O70435	O70435	6	6	6	Proteasome subunit alpha type-3	Psma3	sp|O70435|PSA3_MOUSE Proteasome subunit alpha type-3 OS=Mus musculus OX=10090 GN=Psma3 PE=1 SV=3	1	6	6	6	5	5	4	4	5	5	4	4	5	5	4	4	25.9	25.9	25.9	28.405	255	255	3.15			22	4	0	66.207	22.4	22.4	17.6	17.6	844640000	163210000	381160000	179220000	121050000	252080000	269830000	193640000
protein_233	O88342	O88342	20	20	20	WD repeat-containing protein 1	Wdr1	sp|O88342|WDR1_MOUSE WD repeat-containing protein 1 OS=Mus musculus OX=10090 GN=Wdr1 PE=1 SV=3	1	20	20	20	5	4	15	17	5	4	15	17	5	4	15	17	40.3	40.3	40.3	66.406	606	606	2.16	2	34	9		0	166	10.4	9.1	34	33.5	2417100000	165730000	98587000	1064400000	1088400000	242320000	123690000	351010000
protein_238	O88448;Q9DBS5	O88448	7;1	4;0	4;0	Kinesin light chain 2	Klc2	sp|O88448|KLC2_MOUSE Kinesin light chain 2 OS=Mus musculus OX=10090 GN=Klc2 PE=1 SV=1	2	7	4	4	0	3	3	7	0	1	2	4	0	1	2	4	15.7	6.8	6.8	66.662	599	599;619	1.86	1	6			0.00074963	24.148	0	7.2	5.8	15.7	53087000	0	4759300	11411000	36917000	0	0	16597000
protein_249	O88569	O88569	15	15	15	Heterogeneous nuclear ribonucleoproteins A2/B1	Hnrnpa2b1	sp|O88569|ROA2_MOUSE Heterogeneous nuclear ribonucleoproteins A2/B1 OS=Mus musculus OX=10090 GN=Hnrnpa2b1 PE=1 SV=2	1	15	15	15	6	11	13	11	6	11	13	11	6	11	13	11	42.8	42.8	42.8	37.402	353	353	2.86		17	54	6	0	323.31	21	30.9	32.3	36.8	5004900000	891720000	1104300000	1983900000	1025000000	764650000	464120000	811750000
protein_252	O88643	O88643	11	11	5	Serine/threonine-protein kinase PAK 1	Pak1	sp|O88643|PAK1_MOUSE Serine/threonine-protein kinase PAK 1 OS=Mus musculus OX=10090 GN=Pak1 PE=1 SV=1	1	11	11	5	2	1	8	9	2	1	8	9	1	0	5	4	22.2	22.2	11	60.736	545	545	2	1	21	1		0	83.927	5.5	2.2	16.3	20.6	834330000	44375000	3308800	347850000	438800000	0	0	140060000
protein_257	O88712;P56546	O88712	10;2	10;2	10;2	C-terminal-binding protein 1	Ctbp1	sp|O88712|CTBP1_MOUSE C-terminal-binding protein 1 OS=Mus musculus OX=10090 GN=Ctbp1 PE=1 SV=2	2	10	10	10	7	3	9	9	7	3	9	9	7	3	9	9	24	24	24	47.744	441	441;445	2.44		20	13	1	0	323.31	17.7	6.8	21.8	19.5	1180000000	255370000	19669000	546650000	358350000	271480000	51778000	163000000
protein_259	O88737	O88737	44	44	44	Protein bassoon	Bsn	sp|O88737|BSN_MOUSE Protein bassoon OS=Mus musculus OX=10090 GN=Bsn PE=1 SV=4	1	44	44	44	6	37	19	27	6	37	19	27	6	37	19	27	14.3	14.3	14.3	418.84	3942	3942	1.21	83	13	4		0	323.31	2	12.7	5.5	8.3	2599100000	121050000	1363500000	456800000	657800000	87941000	148690000	124230000
protein_264	O88935	O88935	31	31	28	Synapsin-1	Syn1	sp|O88935|SYN1_MOUSE Synapsin-1 OS=Mus musculus OX=10090 GN=Syn1 PE=1 SV=2	1	31	31	28	14	30	23	25	14	30	23	25	12	28	20	23	64.2	64.2	60.6	74.096	706	706	1.83	88	83	33	9	0	323.31	29	64	44.3	56.4	40435000000	4269600000	12308000000	11851000000	12007000000	1660900000	1367800000	1375600000
protein_265	O88951	O88951	5	2	2	Protein lin-7 homolog B	Lin7b	sp|O88951|LIN7B_MOUSE Protein lin-7 homolog B OS=Mus musculus OX=10090 GN=Lin7b PE=1 SV=2	1	5	2	2	5	5	5	3	2	2	2	0	2	2	2	0	30.4	12.1	12.1	22.914	207	207	3			6		0.0011628	16.511	30.4	30.4	30.4	18.4	122210000	57417000	29060000	35729000	0	152100000	88861000	0
protein_266	O88952	O88952	7	4	4	Protein lin-7 homolog C	Lin7c	sp|O88952|LIN7C_MOUSE Protein lin-7 homolog C OS=Mus musculus OX=10090 GN=Lin7c PE=1 SV=2	1	7	4	4	5	7	4	3	2	4	1	0	2	4	1	0	48.2	24.9	24.9	21.834	197	197	3			7		0.00081633	26.692	32	48.2	33	23.4	112660000	26040000	70400000	16222000	0	80533000	55997000	0
protein_271	O89053	O89053	9	9	9	Coronin-1A	Coro1a	sp|O89053|COR1A_MOUSE Coronin-1A OS=Mus musculus OX=10090 GN=Coro1a PE=1 SV=5	1	9	9	9	5	3	5	7	5	3	5	7	5	3	5	7	18.2	18.2	18.2	50.989	461	461	2.26	5	14	11	1	0	100.97	13.9	8.7	12.1	16.5	1607800000	372620000	107810000	609700000	517650000	382250000	174670000	335700000
protein_276	P00405	P00405	5	5	5	Cytochrome c oxidase subunit 2	Mtco2	sp|P00405|COX2_MOUSE Cytochrome c oxidase subunit 2 OS=Mus musculus OX=10090 GN=Mtco2 PE=1 SV=1	1	5	5	5	4	5	4	3	4	5	4	3	4	5	4	3	27.8	27.8	27.8	25.976	227	227	3.15	2		29	10	0	135.87	23.3	27.8	23.3	16.3	6050300000	1628700000	3198000000	605490000	618180000	1580900000	2259100000	648580000
protein_279	P00920	P00920	9	9	9	Carbonic anhydrase 2	Ca2	sp|P00920|CAH2_MOUSE Carbonic anhydrase 2 OS=Mus musculus OX=10090 GN=Ca2 PE=1 SV=4	1	9	9	9	8	8	8	7	8	8	8	7	8	8	8	7	48.1	48.1	48.1	29.032	260	260	3.07			39	3	0	323.31	39.6	39.2	39.2	35.8	5342200000	734470000	1820100000	1876000000	911630000	680970000	1172400000	1099900000
protein_280	P01831	P01831	6	6	6	Thy-1 membrane glycoprotein	Thy1	sp|P01831|THY1_MOUSE Thy-1 membrane glycoprotein OS=Mus musculus OX=10090 GN=Thy1 PE=1 SV=1	1	6	6	6	5	6	6	5	5	6	6	5	5	6	6	5	33.3	33.3	33.3	18.08	162	162	3		4	36	4	0	124.03	32.1	33.3	33.3	24.7	21337000000	5032400000	7350900000	5700400000	3253600000	7606700000	7285000000	5502100000
protein_281	P01942	P01942	6	6	4	Hemoglobin subunit alpha	Hba	sp|P01942|HBA_MOUSE Hemoglobin subunit alpha OS=Mus musculus OX=10090 GN=Hba PE=1 SV=2	1	6	6	4	6	6	6	6	6	6	6	6	4	4	4	4	43	43	36.6	15.085	142	142	3.77		4	6	52	0	323.31	43	43	43	43	51177000000	19243000000	22930000000	4720800000	4282300000	21178000000	14382000000	8641100000
protein_282	P02088;P02089;CON__Q3SX09;P02104;CON__P02070	P02088;P02089	8;4;2;1;1	8;4;2;1;1	8;4;2;1;1	Hemoglobin subunit beta-1;Hemoglobin subunit beta-2	Hbb-b1;Hbb-b2	sp|P02088|HBB1_MOUSE Hemoglobin subunit beta-1 OS=Mus musculus OX=10090 GN=Hbb-b1 PE=1 SV=2;sp|P02089|HBB2_MOUSE Hemoglobin subunit beta-2 OS=Mus musculus OX=10090 GN=Hbb-b2 PE=1 SV=2	5	8	8	8	8	8	7	7	8	8	7	7	8	8	7	7	65.3	65.3	65.3	15.84	147	147;147;201;147;145	3.65	4	3	10	63	0	323.31	65.3	65.3	56.5	64.6	47855000000	17219000000	22005000000	4651300000	3979800000	16384000000	10476000000	6962800000
protein_288	P03930	P03930	2	2	2	ATP synthase protein 8	Mtatp8	sp|P03930|ATP8_MOUSE ATP synthase protein 8 OS=Mus musculus OX=10090 GN=Mtatp8 PE=1 SV=1	1	2	2	2	2	2	2	2	2	2	2	2	2	2	2	2	34.3	34.3	34.3	7.7662	67	67	4				8	0	278.19	34.3	34.3	34.3	34.3	1415500000	610630000	496460000	141790000	166640000	1902100000	758850000	637320000
protein_292	P04370	P04370	7	7	7	Myelin basic protein	Mbp	sp|P04370|MBP_MOUSE Myelin basic protein OS=Mus musculus OX=10090 GN=Mbp PE=1 SV=2	1	7	7	7	4	7	5	6	4	7	5	6	4	7	5	6	21.2	21.2	21.2	27.167	250	250	3.44	6	6	21	58	0	323.31	14.4	21.2	18.4	19.2	35313000000	2299500000	22532000000	4178800000	6303300000	2704800000	10503000000	3167800000
protein_295	P05063	P05063	22	19	19	Fructose-bisphosphate aldolase C	Aldoc	sp|P05063|ALDOC_MOUSE Fructose-bisphosphate aldolase C OS=Mus musculus OX=10090 GN=Aldoc PE=1 SV=4	1	22	19	19	14	15	17	20	12	13	15	17	12	13	15	17	68	59.2	59.2	39.394	363	363	2.49	5	60	28	15	0	323.31	43	50.1	50.4	66.1	10396000000	1445400000	621070000	4605600000	3724200000	596420000	622570000	537210000
protein_296	P05064;Q91Y97	P05064	25;1	25;1	22;0	Fructose-bisphosphate aldolase A	Aldoa	sp|P05064|ALDOA_MOUSE Fructose-bisphosphate aldolase A OS=Mus musculus OX=10090 GN=Aldoa PE=1 SV=2	2	25	25	22	11	18	20	21	11	18	20	21	9	16	18	18	69.2	69.2	60.4	39.355	364	364;364	2.34	19	92	47	16	0	323.31	43.4	50.8	62.6	62.6	42716000000	9626000000	2543200000	14883000000	15664000000	4417400000	4423300000	4851400000
protein_297	P05201	P05201	20	20	20	Aspartate aminotransferase, cytoplasmic	Got1	sp|P05201|AATC_MOUSE Aspartate aminotransferase, cytoplasmic OS=Mus musculus OX=10090 GN=Got1 PE=1 SV=3	1	20	20	20	13	17	18	18	13	17	18	18	13	17	18	18	56.9	56.9	56.9	46.247	413	413	2.66	3	66	54	23	0	323.31	32.7	46	51.1	52.1	14344000000	2588300000	1392500000	4894800000	5468300000	1325000000	899580000	990210000
protein_298	P05202	P05202	20	20	20	Aspartate aminotransferase, mitochondrial	Got2	sp|P05202|AATM_MOUSE Aspartate aminotransferase, mitochondrial OS=Mus musculus OX=10090 GN=Got2 PE=1 SV=1	1	20	20	20	18	17	19	19	18	17	19	19	18	17	19	19	40.5	40.5	40.5	47.411	430	430	2.62	17	78	78	34	0	323.31	34.9	38.4	40.5	40.5	22206000000	5446800000	3016300000	6309000000	7433500000	3078700000	1661600000	1490400000
protein_300	P05480;P16056;Q62190;Q922K9;Q62270	P05480	7;1;1;1;1	7;1;1;1;1	5;1;1;1;1	Neuronal proto-oncogene tyrosine-protein kinase Src	Src	sp|P05480|SRC_MOUSE Neuronal proto-oncogene tyrosine-protein kinase Src OS=Mus musculus OX=10090 GN=Src PE=1 SV=5	5	7	7	5	0	0	4	6	0	0	4	6	0	0	2	4	12.9	12.9	9.5	59.89	535	535;1379;1378;512;496	2		10			0	42.611	0	0	7.3	11.2	167210000	0	0	78249000	88960000	0	0	41476000
protein_302	P06151;P00342	P06151	20;2	20;2	19;1	L-lactate dehydrogenase A chain	Ldha	sp|P06151|LDHA_MOUSE L-lactate dehydrogenase A chain OS=Mus musculus OX=10090 GN=Ldha PE=1 SV=3	2	20	20	19	9	16	17	13	9	16	17	13	9	15	16	13	48.2	48.2	44.6	36.498	332	332;332	2.83	8	10	67	10	0	283.75	29.5	44.6	46.7	42.2	14567000000	1718400000	5572100000	4975700000	2301200000	924880000	2318100000	1921400000
protein_303	P06745;CON__Q3ZBD7	P06745	16;7	16;7	16;7	Glucose-6-phosphate isomerase	Gpi	sp|P06745|G6PI_MOUSE Glucose-6-phosphate isomerase OS=Mus musculus OX=10090 GN=Gpi PE=1 SV=4	2	16	16	16	8	10	13	16	8	10	13	16	8	10	13	16	40.3	40.3	40.3	62.766	558	558;557	2.29	5	66	26	4	0	274.04	15.6	22.8	30.3	40.3	12470000000	985590000	414940000	5339500000	5730400000	778670000	888460000	953600000
protein_306	P06837	P06837	5	5	5	Neuromodulin	Gap43	sp|P06837|NEUM_MOUSE Neuromodulin OS=Mus musculus OX=10090 GN=Gap43 PE=1 SV=1	1	5	5	5	1	1	3	3	1	1	3	3	1	1	3	3	33	33	33	23.632	227	227	2.25		7		1	0	124.46	7.5	6.2	25.1	25.1	1247000000	56805000	3631100	770960000	415580000	0	0	888490000
protein_307	P07309	P07309	4	4	4	Transthyretin	Ttr	sp|P07309|TTHY_MOUSE Transthyretin OS=Mus musculus OX=10090 GN=Ttr PE=1 SV=1	1	4	4	4	3	3	1	0	3	3	1	0	3	3	1	0	30.6	30.6	30.6	15.776	147	147	4				7	0.00079554	25.818	25.9	23.8	10.2	0	168850000	61112000	95253000	12482000	0	131710000	96077000	0
protein_309	P07724	P07724	12	12	11	Serum albumin	Alb	sp|P07724|ALBU_MOUSE Albumin OS=Mus musculus OX=10090 GN=Alb PE=1 SV=3	1	12	12	11	8	10	8	11	8	10	8	11	8	10	8	10	20.1	20.1	18.6	68.692	608	608	2.14	10	39	13	3	0	123.02	16.9	18.6	13.8	19.9	3952400000	972920000	586950000	859840000	1532700000	893450000	766600000	320730000
protein_311	P07901	P07901	35	19	19	Heat shock protein HSP 90-alpha	Hsp90aa1	sp|P07901|HS90A_MOUSE Heat shock protein HSP 90-alpha OS=Mus musculus OX=10090 GN=Hsp90aa1 PE=1 SV=4	1	35	19	19	17	34	25	28	9	19	15	16	9	19	15	16	36	20.6	20.6	84.787	733	733	1.65	64	26	15	5	0	323.31	23.9	36	28.4	30.4	8660500000	520390000	3966800000	1464700000	2708700000	400260000	638850000	479410000
protein_313	P08113	P08113	17	15	15	Endoplasmin	Hsp90b1	sp|P08113|ENPL_MOUSE Endoplasmin OS=Mus musculus OX=10090 GN=Hsp90b1 PE=1 SV=2	1	17	15	15	6	16	11	13	4	14	9	11	4	14	9	11	21.9	20.2	20.2	92.475	802	802	1.4	35	10	5		0	102.72	7	20.6	14.7	16.6	1662900000	55245000	752620000	312880000	542210000	49278000	138330000	138040000
protein_315	P08226	P08226	11	11	11	Apolipoprotein E	Apoe	sp|P08226|APOE_MOUSE Apolipoprotein E OS=Mus musculus OX=10090 GN=Apoe PE=1 SV=2	1	11	11	11	5	8	7	7	5	8	7	7	5	8	7	7	38.3	38.3	38.3	35.866	311	311	3			28		0	110.67	17.4	26.4	21.9	20.9	1059100000	138770000	475560000	278280000	166490000	164190000	287710000	145490000
protein_316	P08228	P08228	5	5	5	Superoxide dismutase [Cu-Zn]	Sod1	sp|P08228|SODC_MOUSE Superoxide dismutase [Cu-Zn] OS=Mus musculus OX=10090 GN=Sod1 PE=1 SV=2	1	5	5	5	4	5	4	4	4	5	4	4	4	5	4	4	39	39	39	15.942	154	154	3.86		1	2	26	0	160.33	32.5	39	32.5	32.5	7160900000	1667400000	2947100000	1735400000	811090000	2724100000	3040700000	3010600000
protein_317	P08249	P08249	15	15	15	Malate dehydrogenase, mitochondrial	Mdh2	sp|P08249|MDHM_MOUSE Malate dehydrogenase, mitochondrial OS=Mus musculus OX=10090 GN=Mdh2 PE=1 SV=3	1	15	15	15	11	14	12	14	11	14	12	14	11	14	12	14	56.8	56.8	56.8	35.611	338	338	2.88	15	37	90	45	0	323.31	42	53	47	53	53159000000	6432900000	16815000000	18702000000	11208000000	3384500000	8985700000	9212400000
protein_319	P08551	P08551	19	15	15	Neurofilament light polypeptide	Nefl	sp|P08551|NFL_MOUSE Neurofilament light polypeptide OS=Mus musculus OX=10090 GN=Nefl PE=1 SV=5	1	19	15	15	3	11	9	18	2	7	6	15	2	7	6	15	36.6	31.3	31.3	61.508	543	543	1.92	7	28	4		0	135.33	4.6	17.9	14.7	36.5	1763300000	20585000	266890000	273210000	1202600000	22464000	57582000	84854000
protein_320	P08553	P08553	23	23	18	Neurofilament medium polypeptide	Nefm	sp|P08553|NFM_MOUSE Neurofilament medium polypeptide OS=Mus musculus OX=10090 GN=Nefm PE=1 SV=4	1	23	23	18	2	21	11	17	2	21	11	17	1	16	8	14	27.5	27.5	24.1	95.915	848	848	1.29	50	16	2		0	308.25	2.2	25.1	13.1	21.5	3737900000	66355000	1783400000	474330000	1413900000	103560000	473870000	290390000
protein_323	P09103	P09103	9	9	9	Protein disulfide-isomerase	P4hb	sp|P09103|PDIA1_MOUSE Protein disulfide-isomerase OS=Mus musculus OX=10090 GN=P4hb PE=1 SV=2	1	9	9	9	0	0	3	9	0	0	3	9	0	0	3	9	20	20	20	57.058	509	509	2		12			0	55.925	0	0	6.7	20	290060000	0	0	79786000	210280000	0	0	32109000
protein_325	P09411;P09041	P09411	20;4	20;4	20;4	Phosphoglycerate kinase 1	Pgk1	sp|P09411|PGK1_MOUSE Phosphoglycerate kinase 1 OS=Mus musculus OX=10090 GN=Pgk1 PE=1 SV=4	2	20	20	20	12	8	13	15	12	8	13	15	12	8	13	15	54.2	54.2	54.2	44.55	417	417;417	2.37	6	49	31	4	0	323.31	33.8	26.1	31.9	40.3	11686000000	2772700000	1163400000	3498400000	4251600000	1616800000	1415700000	1189100000
protein_326	P09528	P09528	7	7	7	Ferritin heavy chain;Ferritin heavy chain, N-terminally processed	Fth1	sp|P09528|FRIH_MOUSE Ferritin heavy chain OS=Mus musculus OX=10090 GN=Fth1 PE=1 SV=2	1	7	7	7	4	7	4	4	4	7	4	4	4	7	4	4	35.7	35.7	35.7	21.066	182	182	3.18	6		9	18	0	87.849	22.5	35.7	23.6	24.2	1302800000	278400000	683380000	190070000	150970000	356380000	294570000	439330000
protein_328	P09671	P09671	8	8	8	Superoxide dismutase [Mn], mitochondrial	Sod2	sp|P09671|SODM_MOUSE Superoxide dismutase [Mn], mitochondrial OS=Mus musculus OX=10090 GN=Sod2 PE=1 SV=3	1	8	8	8	7	8	5	6	7	8	5	6	7	8	5	6	38.7	38.7	38.7	24.603	222	222	3.26			34	12	0	323.31	35.1	38.7	20.3	26.6	5529100000	1623300000	2350700000	886390000	668680000	1858200000	2044900000	1027500000
protein_331	Q3THW5;P0C0S6	Q3THW5;P0C0S6	4;4	2;2	2;2	Histone H2A.V;Histone H2A.Z	H2afv;H2afz	sp|Q3THW5|H2AV_MOUSE Histone H2A.V OS=Mus musculus OX=10090 GN=H2az2 PE=1 SV=3;sp|P0C0S6|H2AZ_MOUSE Histone H2A.Z OS=Mus musculus OX=10090 GN=H2az1 PE=1 SV=2	2	4	2	2	4	4	4	3	2	2	2	1	2	2	2	1	31.2	18.8	18.8	13.509	128	128;128	4				7	0.0014045	21.177	31.2	31.2	31.2	20.3	263690000	93277000	113820000	29726000	26874000	229320000	147600000	0
protein_334	P0CG50;P0CG49;P62983;P62984	P0CG50;P0CG49;P62983;P62984	4;4;4;4	4;4;4;4	4;4;4;4	Polyubiquitin-C;Ubiquitin;Ubiquitin-related 1;Ubiquitin-related 2;Polyubiquitin-B;Ubiquitin;Ubiquitin-40S ribosomal protein S27a;Ubiquitin;40S ribosomal protein S27a;Ubiquitin-60S ribosomal protein L40;Ubiquitin;60S ribosomal protein L40	Ubc;Ubb;Rps27a;Uba52	sp|P0CG50|UBC_MOUSE Polyubiquitin-C OS=Mus musculus OX=10090 GN=Ubc PE=1 SV=2;sp|P0CG49|UBB_MOUSE Polyubiquitin-B OS=Mus musculus OX=10090 GN=Ubb PE=2 SV=1;sp|P62983|RS27A_MOUSE Ubiquitin-40S ribosomal protein S27a OS=Mus musculus OX=10090 GN=Rps27a PE=1 S	4	4	4	4	4	4	4	4	4	4	4	4	4	4	4	4	57.6	57.6	57.6	82.549	734	734;305;156;128	2.5	21	12	15	20	0	70.714	57.6	57.6	57.6	57.6	8293900000	1365900000	2958700000	1817600000	2151800000	1387800000	1053200000	1922300000
protein_336	P0DP28;P0DP27;P0DP26;Q9D6P8;P20801	P0DP28;P0DP27;P0DP26;Q9D6P8	11;11;11;6;1	11;11;11;6;1	11;11;11;6;1	Calmodulin-like protein 3	Calml3	sp|P0DP28|CALM3_MOUSE Calmodulin-3 OS=Mus musculus OX=10090 GN=Calm3 PE=1 SV=1;sp|P0DP27|CALM2_MOUSE Calmodulin-2 OS=Mus musculus OX=10090 GN=Calm2 PE=1 SV=1;sp|P0DP26|CALM1_MOUSE Calmodulin-1 OS=Mus musculus OX=10090 GN=Calm1 PE=1 SV=1;sp|Q9D6P8|CALL3_MOU	5	11	11	11	8	10	3	6	8	10	3	6	8	10	3	6	60.4	60.4	60.4	16.837	149	149;149;149;149;160	3.8			9	37	0	225.03	59.1	45.6	30.9	40.9	14156000000	5148000000	6129800000	1401900000	1476000000	5143100000	3358000000	2717500000
protein_337	P10126	P10126	11	11	4	Elongation factor 1-alpha 1	Eef1a1	sp|P10126|EF1A1_MOUSE Elongation factor 1-alpha 1 OS=Mus musculus OX=10090 GN=Eef1a1 PE=1 SV=3	1	11	11	4	7	9	11	10	7	9	11	10	2	2	4	3	27.5	27.5	11.7	50.113	462	462	2.34	24	37	28	16	0	323.31	18.6	23.6	27.5	26	10979000000	2153800000	1731400000	3366800000	3726600000	1113000000	1034900000	902170000
protein_341	P10630	P10630	15	15	8	Eukaryotic initiation factor 4A-II;Eukaryotic initiation factor 4A-II, N-terminally processed	Eif4a2	sp|P10630|IF4A2_MOUSE Eukaryotic initiation factor 4A-II OS=Mus musculus OX=10090 GN=Eif4a2 PE=1 SV=2	1	15	15	8	3	6	13	13	3	6	13	13	2	2	7	7	40.5	40.5	18.7	46.402	407	407	2.08	2	32	5		0	155.58	8.6	20.9	33.9	38.3	1988600000	102260000	108720000	815260000	962410000	165850000	229970000	244740000
protein_342	P10637	P10637	11	11	11	Microtubule-associated protein tau	Mapt	sp|P10637|TAU_MOUSE Microtubule-associated protein tau OS=Mus musculus OX=10090 GN=Mapt PE=1 SV=3	1	11	11	11	7	7	11	10	7	7	11	10	7	7	11	10	14.6	14.6	14.6	76.243	733	733	2.17	2	39	11		0	323.31	9.5	9.5	14.6	13.2	4285000000	358360000	149900000	2200500000	1576200000	577410000	283430000	386600000
protein_343	P10639	P10639	2	2	2	Thioredoxin	Txn	sp|P10639|THIO_MOUSE Thioredoxin OS=Mus musculus OX=10090 GN=Txn PE=1 SV=3	1	2	2	2	2	2	1	1	2	2	1	1	2	2	1	1	21	21	21	11.675	105	105	4				7	0	133.65	21	21	12.4	12.4	770810000	238680000	365670000	81263000	85188000	729860000	542180000	0
protein_344	P10649;P19639;O35660	P10649	13;3;1	13;3;1	9;1;0	Glutathione S-transferase Mu 1	Gstm1	sp|P10649|GSTM1_MOUSE Glutathione S-transferase Mu 1 OS=Mus musculus OX=10090 GN=Gstm1 PE=1 SV=2	3	13	13	9	7	13	13	11	7	13	13	11	5	9	9	8	53.2	53.2	33.9	25.97	218	218;218;218	3.12		1	59	9	0	323.31	36.2	53.2	53.2	49.5	10317000000	1593100000	3682600000	3364600000	1676800000	2330200000	2154100000	1676400000
protein_346	P10852	P10852	12	12	12	4F2 cell-surface antigen heavy chain	Slc3a2	sp|P10852|4F2_MOUSE 4F2 cell-surface antigen heavy chain OS=Mus musculus OX=10090 GN=Slc3a2 PE=1 SV=1	1	12	12	12	5	10	8	10	5	10	8	10	5	10	8	10	25.5	25.5	25.5	58.336	526	526	1.67	33	15	6	4	0	89.8	10.3	20.5	15.4	21.3	2006400000	217390000	776880000	254140000	758010000	204640000	219720000	141490000
protein_347	Q6ZWY9;Q64478;P10853;P10854;Q64475;Q64525;Q8CGP2;Q8CGP1;P70696	Q6ZWY9;Q64478;P10853;P10854;Q64475;Q64525;Q8CGP2;Q8CGP1	4;4;4;4;4;4;4;4;1	4;4;4;4;4;4;4;4;1	2;2;2;2;2;2;2;2;0	Histone H2B type 1-C/E/G;Histone H2B type 1-H;Histone H2B type 1-F/J/L;Histone H2B type 1-M;Histone H2B type 1-B;Histone H2B type 2-B;Histone H2B type 1-P;Histone H2B type 1-K	Hist1h2bc;Hist1h2bh;Hist1h2bf;Hist1h2bm;Hist1h2bb;Hist2h2bb;Hist1h2bp;Hist1h2bk	sp|Q6ZWY9|H2B1C_MOUSE Histone H2B type 1-C/E/G OS=Mus musculus OX=10090 GN=H2bc4 PE=1 SV=3;sp|Q64478|H2B1H_MOUSE Histone H2B type 1-H OS=Mus musculus OX=10090 GN=H2bc9 PE=1 SV=3;sp|P10853|H2B1F_MOUSE Histone H2B type 1-F/J/L OS=Mus musculus OX=10090 GN=H2b	9	4	4	2	4	4	4	4	4	4	4	4	2	2	2	2	27	27	7.9	13.906	126	126;126;126;126;126;126;126;126;127	3.46	3	2	8	26	0	59.137	27	27	27	27	11800000000	4076800000	4844200000	1153500000	1725900000	6140500000	5391900000	3237600000
protein_351	P11404	P11404	5	5	5	Fatty acid-binding protein, heart	Fabp3	sp|P11404|FABPH_MOUSE Fatty acid-binding protein, heart OS=Mus musculus OX=10090 GN=Fabp3 PE=1 SV=5	1	5	5	5	4	5	4	2	4	5	4	2	4	5	4	2	41.4	41.4	41.4	14.819	133	133	4				16	0	79.336	30.8	41.4	34.6	17.3	1478600000	373980000	703530000	276060000	124980000	510090000	505270000	450230000
protein_352	P11499	P11499	40	40	22	Heat shock protein HSP 90-beta	Hsp90ab1	sp|P11499|HS90B_MOUSE Heat shock protein HSP 90-beta OS=Mus musculus OX=10090 GN=Hsp90ab1 PE=1 SV=3	1	40	40	22	19	38	25	31	19	38	25	31	9	21	13	17	45.4	45.4	27.9	83.28	724	724	1.64	123	50	35	6	0	323.31	28	45	30.7	36.2	23251000000	1438800000	11080000000	3543100000	7188800000	892820000	1907000000	1482900000
protein_355	P11798	P11798	17	17	12	Calcium/calmodulin-dependent protein kinase type II subunit alpha	Camk2a	sp|P11798|KCC2A_MOUSE Calcium/calmodulin-dependent protein kinase type II subunit alpha OS=Mus musculus OX=10090 GN=Camk2a PE=1 SV=2	1	17	17	12	14	14	17	16	14	14	17	16	9	9	12	11	34.7	34.7	24.1	54.114	478	478	2.5	30	87	68	37	0	323.31	29.3	29.3	34.7	34.7	47756000000	9303700000	5758800000	17472000000	15222000000	3791500000	2575800000	2946700000
protein_357	P11983	P11983	16	16	16	T-complex protein 1 subunit alpha	Tcp1	sp|P11983|TCPA_MOUSE T-complex protein 1 subunit alpha OS=Mus musculus OX=10090 GN=Tcp1 PE=1 SV=3	1	16	16	16	4	2	11	15	4	2	11	15	4	2	11	15	35.1	35.1	35.1	60.448	556	556	2.11	1	32	3	1	0	129.48	7.6	3.8	22.1	32.4	1262000000	75215000	28109000	487900000	670760000	70434000	52938000	124620000
protein_359	P12367	P12367	8	6	6	cAMP-dependent protein kinase type II-alpha regulatory subunit	Prkar2a	sp|P12367|KAP2_MOUSE cAMP-dependent protein kinase type II-alpha regulatory subunit OS=Mus musculus OX=10090 GN=Prkar2a PE=1 SV=2	1	8	6	6	2	2	7	7	1	1	5	5	1	1	5	5	26.7	19.5	19.5	45.389	401	401	2.17		10	2		0	42.217	6	6	24.7	23.9	417480000	13181000	8271600	179770000	216250000	0	0	91843000
protein_361	P12658	P12658	11	11	10	Calbindin	Calb1	sp|P12658|CALB1_MOUSE Calbindin OS=Mus musculus OX=10090 GN=Calb1 PE=1 SV=2	1	11	11	10	9	8	4	7	9	8	4	7	8	8	4	6	46.7	46.7	42.5	29.994	261	261	3			33		0	113.14	41.8	32.2	19.5	31	1299800000	545150000	376570000	155650000	222480000	445840000	438530000	284770000
protein_362	P12787	P12787	7	7	7	Cytochrome c oxidase subunit 5A, mitochondrial	Cox5a	sp|P12787|COX5A_MOUSE Cytochrome c oxidase subunit 5A, mitochondrial OS=Mus musculus OX=10090 GN=Cox5a PE=1 SV=2	1	7	7	7	4	6	5	4	4	6	5	4	4	6	5	4	39	39	39	16.101	146	146	3.95			1	21	0	323.31	21.9	33.6	27.4	21.9	2095700000	497170000	1093500000	226730000	278390000	677390000	572540000	401570000
protein_365	P12960	P12960	25	25	25	Contactin-1	Cntn1	sp|P12960|CNTN1_MOUSE Contactin-1 OS=Mus musculus OX=10090 GN=Cntn1 PE=1 SV=1	1	25	25	25	9	25	12	18	9	25	12	18	9	25	12	18	29.7	29.7	29.7	113.39	1020	1020	1.62	64	17	17	4	0	323.31	9.3	29.7	13.7	22.4	5619200000	326050000	2463300000	913960000	1915900000	189030000	234640000	254380000
protein_366	P12970	P12970	8	8	8	60S ribosomal protein L7a	Rpl7a	sp|P12970|RL7A_MOUSE 60S ribosomal protein L7a OS=Mus musculus OX=10090 GN=Rpl7a PE=1 SV=2	1	8	8	8	5	5	1	1	5	5	1	1	5	5	1	1	26.3	26.3	26.3	29.976	266	266	3			13		0	52.386	17.7	22.6	3.4	4.9	384100000	191660000	161120000	10959000	20361000	299910000	127570000	0
protein_368	P13595	P13595	22	22	22	Neural cell adhesion molecule 1	Ncam1	sp|P13595|NCAM1_MOUSE Neural cell adhesion molecule 1 OS=Mus musculus OX=10090 GN=Ncam1 PE=1 SV=3	1	22	22	22	6	19	17	21	6	19	17	21	6	19	17	21	26.5	26.5	26.5	119.43	1115	1115	1.24	77	9	5	1	0	323.31	7.2	24.4	20.8	25.3	8336500000	370580000	3560200000	1634900000	2770700000	386210000	636100000	645330000
protein_369	P13707	P13707	9	9	8	Glycerol-3-phosphate dehydrogenase [NAD(+)], cytoplasmic	Gpd1	sp|P13707|GPDA_MOUSE Glycerol-3-phosphate dehydrogenase [NAD(+)], cytoplasmic OS=Mus musculus OX=10090 GN=Gpd1 PE=1 SV=3	1	9	9	8	2	8	7	4	2	8	7	4	2	7	7	4	24.6	24.6	21.5	37.572	349	349	3	2		22	4	0	67.391	5.4	21.8	18.9	12	871130000	62946000	380240000	305050000	122890000	75065000	316450000	207430000
protein_370	P14094	P14094	10	10	10	Sodium/potassium-transporting ATPase subunit beta-1	Atp1b1	sp|P14094|AT1B1_MOUSE Sodium/potassium-transporting ATPase subunit beta-1 OS=Mus musculus OX=10090 GN=Atp1b1 PE=1 SV=1	1	10	10	10	6	6	5	10	6	6	5	10	6	6	5	10	36.5	36.5	36.5	35.194	304	304	2.2	23	35	14	13	0	323.31	18.4	18.4	14.8	36.5	19286000000	3187000000	2340900000	5144200000	8613600000	1869200000	2311500000	2147100000
protein_373	P14131	P14131	9	9	9	40S ribosomal protein S16	Rps16	sp|P14131|RS16_MOUSE 40S ribosomal protein S16 OS=Mus musculus OX=10090 GN=Rps16 PE=1 SV=4	1	9	9	9	8	8	4	5	8	8	4	5	8	8	4	5	47.3	47.3	47.3	16.445	146	146	4				25	0	117.55	45.9	42.5	26.7	28.8	1190700000	333690000	660970000	79494000	116570000	273340000	300770000	213000000
protein_374	P14148	P14148	15	15	15	60S ribosomal protein L7	Rpl7	sp|P14148|RL7_MOUSE 60S ribosomal protein L7 OS=Mus musculus OX=10090 GN=Rpl7 PE=1 SV=2	1	15	15	15	7	12	7	6	7	12	7	6	7	12	7	6	40.7	40.7	40.7	31.419	270	270	3			32		0	118.34	24.1	40.7	26.7	23.7	1034200000	259640000	395760000	222960000	155870000	406960000	329600000	185970000
protein_375	P14152	P14152	12	12	12	Malate dehydrogenase, cytoplasmic	Mdh1	sp|P14152|MDHC_MOUSE Malate dehydrogenase, cytoplasmic OS=Mus musculus OX=10090 GN=Mdh1 PE=1 SV=3	1	12	12	12	8	11	9	9	8	11	9	9	8	11	9	9	41.3	41.3	41.3	36.511	334	334	2.9	7	10	57	15	0	323.31	28.4	33.5	36.2	28.4	32500000000	4359200000	12920000000	9612200000	5608700000	2448000000	5612700000	4725400000
protein_376	P14206	P14206	8	8	8	40S ribosomal protein SA	Rpsa	sp|P14206|RSSA_MOUSE 40S ribosomal protein SA OS=Mus musculus OX=10090 GN=Rpsa PE=1 SV=4	1	8	8	8	4	4	5	8	4	4	5	8	4	4	5	8	31.9	31.9	31.9	32.838	295	295	2.52		18	4	5	0	66.547	16.3	16.3	16.6	31.9	723400000	94559000	57052000	246780000	325010000	150660000	45184000	135040000
protein_377	P14211	P14211	9	9	9	Calreticulin	Calr	sp|P14211|CALR_MOUSE Calreticulin OS=Mus musculus OX=10090 GN=Calr PE=1 SV=1	1	9	9	9	4	4	5	8	4	4	5	8	4	4	5	8	19	19	19	47.994	416	416	2.5		18	12	2	0	65.476	9.9	9.9	11.5	17.3	896920000	127650000	118510000	303510000	347240000	164950000	119840000	131370000
protein_378	P14231	P14231	7	7	7	Sodium/potassium-transporting ATPase subunit beta-2	Atp1b2	sp|P14231|AT1B2_MOUSE Sodium/potassium-transporting ATPase subunit beta-2 OS=Mus musculus OX=10090 GN=Atp1b2 PE=1 SV=2	1	7	7	7	4	3	7	4	4	3	7	4	4	3	7	4	17.2	17.2	17.2	33.344	290	290	2.22	1	16	6		0	86.973	11	10	17.2	12.4	1003500000	149980000	65741000	586240000	201540000	448720000	100170000	134140000
protein_379	P14685	P14685	13	13	13	26S proteasome non-ATPase regulatory subunit 3	Psmd3	sp|P14685|PSMD3_MOUSE 26S proteasome non-ATPase regulatory subunit 3 OS=Mus musculus OX=10090 GN=Psmd3 PE=1 SV=3	1	13	13	13	1	1	7	10	1	1	7	10	1	1	7	10	25.3	25.3	25.3	60.718	530	530	2	1	18	1		0	93.177	1.7	1.7	14.3	20	292750000	5927100	3933900	126110000	156780000	0	0	33970000
protein_381	P14824	P14824	20	20	20	Annexin A6	Anxa6	sp|P14824|ANXA6_MOUSE Annexin A6 OS=Mus musculus OX=10090 GN=Anxa6 PE=1 SV=3	1	20	20	20	5	2	11	19	5	2	11	19	5	2	11	19	32.8	32.8	32.8	75.884	673	673	2.13	1	31	6		0	147.04	8.8	2.7	18.7	31.4	1062400000	73187000	9598700	321430000	658190000	54108000	4495200	82895000
protein_382	P14869	P14869	7	7	7	60S acidic ribosomal protein P0	Rplp0	sp|P14869|RLA0_MOUSE 60S acidic ribosomal protein P0 OS=Mus musculus OX=10090 GN=Rplp0 PE=1 SV=3	1	7	7	7	4	5	5	4	4	5	5	4	4	5	5	4	32.5	32.5	32.5	34.216	317	317	3.05			18	1	0	141.57	13.9	24	19.2	13.9	1010600000	65756000	292460000	428620000	223740000	73727000	171210000	322230000
protein_383	P14873	P14873	39	38	38	Microtubule-associated protein 1B;MAP1B heavy chain;MAP1 light chain LC1	Map1b	sp|P14873|MAP1B_MOUSE Microtubule-associated protein 1B OS=Mus musculus OX=10090 GN=Map1b PE=1 SV=2	1	39	38	38	9	32	22	28	9	31	21	27	9	31	21	27	20.3	19.8	19.8	270.25	2464	2464	1.37	82	8	14	1	0	323.31	4.7	16.8	11	14.5	4522700000	198560000	2343400000	814880000	1165800000	193200000	326250000	277550000
protein_384	P15105	P15105	8	8	8	Glutamine synthetase	Glul	sp|P15105|GLNA_MOUSE Glutamine synthetase OS=Mus musculus OX=10090 GN=Glul PE=1 SV=6	1	8	8	8	4	6	7	8	4	6	7	8	4	6	7	8	24.7	24.7	24.7	42.119	373	373	2.42	10	22	16	9	0	323.31	10.7	15.8	20.1	24.7	7657300000	1493800000	1062700000	2334000000	2766900000	1720500000	859010000	1219100000
protein_389	P15532	P15532	7	7	3	Nucleoside diphosphate kinase A	Nme1	sp|P15532|NDKA_MOUSE Nucleoside diphosphate kinase A OS=Mus musculus OX=10090 GN=Nme1 PE=1 SV=1	1	7	7	3	6	7	6	5	6	7	6	5	3	3	2	1	48	48	23	17.208	152	152	4				32	0	99.134	36.8	48	38.2	31.6	6522300000	1537700000	3178400000	863650000	942540000	1937600000	1603500000	1340900000
protein_392	P16125	P16125	16	15	15	L-lactate dehydrogenase B chain	Ldhb	sp|P16125|LDHB_MOUSE L-lactate dehydrogenase B chain OS=Mus musculus OX=10090 GN=Ldhb PE=1 SV=2	1	16	15	15	12	15	16	12	12	14	15	12	12	14	15	12	42.8	39.2	39.2	36.572	334	334	2.65	15	28	66	15	0	323.31	39.2	42.8	42.8	36.5	24814000000	2597100000	7399800000	10142000000	4675500000	1767900000	3707100000	4101000000
protein_393	P16330	P16330	23	23	23	2,3-cyclic-nucleotide 3-phosphodiesterase	Cnp	sp|P16330|CN37_MOUSE 2,3-cyclic-nucleotide 3-phosphodiesterase OS=Mus musculus OX=10090 GN=Cnp PE=1 SV=3	1	23	23	23	8	15	16	22	8	15	16	22	8	15	16	22	37.1	37.1	37.1	47.123	420	420	2.23	15	60	24	8	0	224.72	19.3	27.1	27.4	37.1	7368000000	510800000	1045600000	1570700000	4240800000	224820000	599160000	283410000
protein_397	P16460	P16460	4	4	4	Argininosuccinate synthase	Ass1	sp|P16460|ASSY_MOUSE Argininosuccinate synthase OS=Mus musculus OX=10090 GN=Ass1 PE=1 SV=1	1	4	4	4	0	0	2	4	0	0	2	4	0	0	2	4	8.7	8.7	8.7	46.584	412	412	2		6			0.00073801	23.739	0	0	4.1	8.7	96983000	0	0	43531000	53451000	0	0	31307000
protein_398	P16546;P08032	P16546	152;1	152;1	152;1	Spectrin alpha chain, non-erythrocytic 1	Sptan1	sp|P16546|SPTN1_MOUSE Spectrin alpha chain, non-erythrocytic 1 OS=Mus musculus OX=10090 GN=Sptan1 PE=1 SV=4	2	152	152	152	58	138	96	121	58	138	96	121	58	138	96	121	57.3	57.3	57.3	284.59	2472	2472;2415	1.55	448	169	82	22	0	323.31	28.6	53.1	43.1	49.3	56346000000	3430200000	26132000000	9832600000	16951000000	659210000	994440000	805400000
protein_400	P16858;Q64467	P16858	16;2	16;2	16;2	Glyceraldehyde-3-phosphate dehydrogenase	Gapdh	sp|P16858|G3P_MOUSE Glyceraldehyde-3-phosphate dehydrogenase OS=Mus musculus OX=10090 GN=Gapdh PE=1 SV=2	2	16	16	16	15	15	15	15	15	15	15	15	15	15	15	15	49.5	49.5	49.5	35.81	333	333;440	2.82	16	52	135	40	0	323.31	49.5	49.5	49.5	49.5	76410000000	11259000000	15561000000	31073000000	18517000000	8249000000	7862600000	15059000000
protein_401	P17156	P17156	14	6	6	Heat shock-related 70 kDa protein 2	Hspa2	sp|P17156|HSP72_MOUSE Heat shock-related 70 kDa protein 2 OS=Mus musculus OX=10090 GN=Hspa2 PE=1 SV=2	1	14	6	6	9	9	12	14	1	1	4	6	1	1	4	6	22.6	10.3	10.3	69.641	633	633	2.15		11	2		0	40.254	14.2	14.2	18.6	22.6	289680000	14789000	4602500	134100000	136190000	0	0	64436000
protein_402	P17182;P21550	P17182	21;2	21;2	19;1	Alpha-enolase	Eno1	sp|P17182|ENOA_MOUSE Alpha-enolase OS=Mus musculus OX=10090 GN=Eno1 PE=1 SV=3	2	21	21	19	13	16	20	18	13	16	20	18	11	14	18	16	60.8	60.8	53.7	47.14	434	434;434	2.51	13	89	53	26	0	323.31	42.2	51.6	56.2	58.3	47919000000	10744000000	4204100000	18032000000	14938000000	4191300000	2910300000	3138500000
protein_403	P17183	P17183	16	14	14	Gamma-enolase	Eno2	sp|P17183|ENOG_MOUSE Gamma-enolase OS=Mus musculus OX=10090 GN=Eno2 PE=1 SV=2	1	16	14	14	12	10	15	16	10	8	13	14	10	8	13	14	57.4	50.2	50.2	47.296	434	434	2.57		56	20	16	0	257.41	43.3	38	57.4	57.4	12848000000	1311200000	1129600000	4757300000	5650000000	1077800000	1118200000	990790000
protein_404	P17426	P17426	33	33	24	AP-2 complex subunit alpha-1	Ap2a1	sp|P17426|AP2A1_MOUSE AP-2 complex subunit alpha-1 OS=Mus musculus OX=10090 GN=Ap2a1 PE=1 SV=1	1	33	33	24	12	30	20	28	12	30	20	28	10	22	14	20	33.4	33.4	25.1	107.66	977	977	1.75	91	45	27	10	0	323.31	13.4	31.7	22.7	33.3	9738700000	977830000	3892600000	1828800000	3039400000	569050000	444990000	405630000
protein_405	P17427	P17427	29	20	20	AP-2 complex subunit alpha-2	Ap2a2	sp|P17427|AP2A2_MOUSE AP-2 complex subunit alpha-2 OS=Mus musculus OX=10090 GN=Ap2a2 PE=1 SV=2	1	29	20	20	10	26	19	26	8	18	13	18	8	18	13	18	32.5	23.9	23.9	104.02	938	938	1.5	60	21	13		0	231.23	11.2	29.4	19.4	28.8	3896900000	222880000	1619300000	678300000	1376400000	171360000	184980000	205540000
protein_408	P17710;O08528;Q91W97;Q3TRM8	P17710	37;4;3;1	37;4;3;1	37;4;3;1	Hexokinase-1	Hk1	sp|P17710|HXK1_MOUSE Hexokinase-1 OS=Mus musculus OX=10090 GN=Hk1 PE=1 SV=3	4	37	37	37	22	35	30	35	22	35	30	35	22	35	30	35	36.1	36.1	36.1	108.3	974	974;917;915;922	1.76	141	61	54	12	0	323.31	21.5	35	31.9	35.1	20798000000	1805100000	7730900000	4422100000	6839500000	471820000	598360000	660860000
protein_409	P17742	P17742	10	10	10	Peptidyl-prolyl cis-trans isomerase A;Peptidyl-prolyl cis-trans isomerase A, N-terminally processed	Ppia	sp|P17742|PPIA_MOUSE Peptidyl-prolyl cis-trans isomerase A OS=Mus musculus OX=10090 GN=Ppia PE=1 SV=2	1	10	10	10	8	10	8	9	8	10	8	9	8	10	8	9	54.3	54.3	54.3	17.971	164	164	3.96			3	67	0	275.22	39.6	54.3	39.6	45.7	30964000000	7291900000	15321000000	3723500000	4627300000	5947400000	5729100000	4702800000
protein_410	P17751	P17751	12	12	12	Triosephosphate isomerase	Tpi1	sp|P17751|TPIS_MOUSE Triosephosphate isomerase OS=Mus musculus OX=10090 GN=Tpi1 PE=1 SV=5	1	12	12	12	8	12	10	9	8	12	10	9	8	12	10	9	58.6	58.6	58.6	26.712	249	249	2.95	6	5	62	13	0	323.31	43	58.6	50.6	43.4	28088000000	6206200000	11879000000	6528200000	3474800000	5469000000	6083300000	4313800000
protein_417	P18760	P18760	10	10	9	Cofilin-1	Cfl1	sp|P18760|COF1_MOUSE Cofilin-1 OS=Mus musculus OX=10090 GN=Cfl1 PE=1 SV=3	1	10	10	9	7	10	6	5	7	10	6	5	6	9	5	4	57.8	57.8	51.2	18.559	166	166	3.38	5	3	14	34	0	323.31	49.4	57.8	47.6	39.2	20130000000	5113700000	10225000000	2281100000	2510200000	3150600000	4915200000	4309700000
protein_418	P18872;Q8CGK7	P18872	14;1	14;1	12;0	Guanine nucleotide-binding protein G(o) subunit alpha	Gnao1	sp|P18872|GNAO_MOUSE Guanine nucleotide-binding protein G(o) subunit alpha OS=Mus musculus OX=10090 GN=Gnao1 PE=1 SV=3	2	14	14	12	11	12	13	12	11	12	13	12	9	10	11	10	41.5	41.5	35	40.084	354	354;381	2.35	25	57	53	12	0	323.31	35.6	36.2	41	38.7	31712000000	5083500000	3781300000	12884000000	9963800000	2462000000	2130500000	3941700000
protein_419	P19096	P19096	31	31	31	Fatty acid synthase;[Acyl-carrier-protein] S-acetyltransferase;[Acyl-carrier-protein] S-malonyltransferase;3-oxoacyl-[acyl-carrier-protein] synthase;3-oxoacyl-[acyl-carrier-protein] reductase;3-hydroxyacyl-[acyl-carrier-protein] dehydratase;Enoyl-[acyl-carrier-protein] reductase;Oleoyl-[acyl-carrier-protein] hydrolase	Fasn	sp|P19096|FAS_MOUSE Fatty acid synthase OS=Mus musculus OX=10090 GN=Fasn PE=1 SV=2	1	31	31	31	5	23	13	22	5	23	13	22	5	23	13	22	13.5	13.5	13.5	272.43	2504	2504	1.28	60	10	4	1	0	234.33	2.2	10.1	5.7	9.7	1392800000	53652000	645130000	163920000	530120000	35524000	65829000	43232000
protein_420	P19157;P46425	P19157;P46425	7;4	7;4	7;4	Glutathione S-transferase P 1;Glutathione S-transferase P 2	Gstp1;Gstp2	sp|P19157|GSTP1_MOUSE Glutathione S-transferase P 1 OS=Mus musculus OX=10090 GN=Gstp1 PE=1 SV=2;sp|P46425|GSTP2_MOUSE Glutathione S-transferase P 2 OS=Mus musculus OX=10090 GN=Gstp2 PE=1 SV=2	2	7	7	7	4	5	3	3	4	5	3	3	4	5	3	3	50	50	50	23.609	210	210;210	3.15			23	4	0	111.16	29.5	35.2	22.4	22.4	5613200000	909910000	2266200000	1475900000	961190000	1519300000	1867500000	1413100000
protein_424	P19536	P19536	6	6	6	Cytochrome c oxidase subunit 5B, mitochondrial	Cox5b	sp|P19536|COX5B_MOUSE Cytochrome c oxidase subunit 5B, mitochondrial OS=Mus musculus OX=10090 GN=Cox5b PE=1 SV=1	1	6	6	6	4	6	4	4	4	6	4	4	4	6	4	4	29.7	29.7	29.7	13.813	128	128	4				36	0	323.31	25	29.7	25	25	2011800000	342230000	1146700000	288260000	234590000	411170000	624140000	476820000
protein_425	P19783	P19783	13	13	13	Cytochrome c oxidase subunit 4 isoform 1, mitochondrial	Cox4i1	sp|P19783|COX41_MOUSE Cytochrome c oxidase subunit 4 isoform 1, mitochondrial OS=Mus musculus OX=10090 GN=Cox4i1 PE=1 SV=2	1	13	13	13	9	12	8	8	9	12	8	8	9	12	8	8	55.6	55.6	55.6	19.53	169	169	3.79	4			53	0	323.31	48.5	55.6	48.5	48.5	13047000000	2483300000	7499000000	1473100000	1592000000	2135300000	1918000000	1326300000
protein_426	P20029	P20029	25	23	23	78 kDa glucose-regulated protein	Hspa5	sp|P20029|BIP_MOUSE Endoplasmic reticulum chaperone BiP OS=Mus musculus OX=10090 GN=Hspa5 PE=1 SV=3	1	25	23	23	7	18	18	19	5	16	16	17	5	16	16	17	39.7	38	38	72.421	655	655	1.68	24	34	4		0	186.39	11.9	28.5	30.4	33.7	2695500000	100180000	740940000	856850000	997560000	108980000	123340000	182880000
protein_427	P20060	P20060	6	6	6	Beta-hexosaminidase subunit beta	Hexb	sp|P20060|HEXB_MOUSE Beta-hexosaminidase subunit beta OS=Mus musculus OX=10090 GN=Hexb PE=1 SV=2	1	6	6	6	1	1	2	5	1	1	2	5	1	1	2	5	9	9	9	61.115	536	536	2.33		7	1	1	0	36.385	1.7	1.9	3.4	7.1	55300000	3005500	6124600	10691000	35478000	0	0	7988700
protein_428	P20108	P20108	7	7	7	Thioredoxin-dependent peroxide reductase, mitochondrial	Prdx3	sp|P20108|PRDX3_MOUSE Thioredoxin-dependent peroxide reductase, mitochondrial OS=Mus musculus OX=10090 GN=Prdx3 PE=1 SV=1	1	7	7	7	4	7	5	5	4	7	5	5	4	7	5	5	30.7	30.7	30.7	28.127	257	257	3.07			26	2	0	78.633	18.3	30.7	21.4	21.4	1639600000	207250000	807960000	418790000	205580000	251330000	590130000	405870000
protein_429	P20152;P31001;P15331	P20152	14;3;2	13;2;2	13;2;2	Vimentin	Vim	sp|P20152|VIME_MOUSE Vimentin OS=Mus musculus OX=10090 GN=Vim PE=1 SV=3	3	14	13	13	1	1	11	12	0	0	10	11	0	0	10	11	32	30	30	53.687	466	466;469;475	2		21			0	89.445	1.9	1.9	27.7	27.7	667550000	0	0	312400000	355150000	0	0	61200000
protein_431	P20357	P20357	52	52	52	Microtubule-associated protein 2	Map2	sp|P20357|MTAP2_MOUSE Microtubule-associated protein 2 OS=Mus musculus OX=10090 GN=Map2 PE=1 SV=2	1	52	52	52	18	47	29	41	18	47	29	41	18	47	29	41	30.8	30.8	30.8	199.13	1828	1828	1.32	152	28	13	3	0	323.31	11.1	28.7	17.8	23.6	15531000000	982380000	7053700000	2276800000	5217900000	310480000	485550000	461550000
protein_434	P21107	P21107	14	14	9	Tropomyosin alpha-3 chain	Tpm3	sp|P21107|TPM3_MOUSE Tropomyosin alpha-3 chain OS=Mus musculus OX=10090 GN=Tpm3 PE=1 SV=3	1	14	14	9	9	13	9	6	9	13	9	6	6	8	5	3	35.1	35.1	25.6	32.994	285	285	3			40		0	152.49	21.4	35.1	21.4	17.9	3333600000	1199700000	1152000000	699790000	282140000	1087100000	801150000	571470000
protein_436	P21278	P21278	10	10	6	Guanine nucleotide-binding protein subunit alpha-11	Gna11	sp|P21278|GNA11_MOUSE Guanine nucleotide-binding protein subunit alpha-11 OS=Mus musculus OX=10090 GN=Gna11 PE=1 SV=1	1	10	10	6	3	3	4	10	3	3	4	10	1	1	2	6	35.1	35.1	21.2	42.024	359	359	2.41	1	17	9	2	0	186.8	7.8	7.8	11.4	35.1	926810000	143670000	78209000	289060000	415870000	165590000	131580000	140290000
protein_439	P21619	P21619	9	8	8	Lamin-B2	Lmnb2	sp|P21619|LMNB2_MOUSE Lamin-B2 OS=Mus musculus OX=10090 GN=Lmnb2 PE=1 SV=2	1	9	8	8	0	0	5	6	0	0	4	6	0	0	4	6	15.4	14.1	14.1	67.317	596	596	2		10			0	54.502	0	0	8.2	10.9	151480000	0	0	70138000	81347000	0	0	38304000
protein_447	P23506	P23506	8	8	8	Protein-L-isoaspartate(D-aspartate) O-methyltransferase	Pcmt1	sp|P23506|PIMT_MOUSE Protein-L-isoaspartate(D-aspartate) O-methyltransferase OS=Mus musculus OX=10090 GN=Pcmt1 PE=1 SV=3	1	8	8	8	3	8	6	3	3	8	6	3	3	8	6	3	37	37	37	24.634	227	227	3.17			24	5	0	161.53	15.4	37	21.6	11.5	1579200000	621400000	407070000	448730000	102000000	629690000	406320000	488460000
protein_450	P23819	P23819	22	22	18	Glutamate receptor 2	Gria2	sp|P23819|GRIA2_MOUSE Glutamate receptor 2 OS=Mus musculus OX=10090 GN=Gria2 PE=1 SV=3	1	22	22	18	3	20	3	11	3	20	3	11	2	17	3	9	27.7	27.7	22.5	98.661	883	883	1.33	39	2	7		0	152.19	3.6	25.8	3.9	12.9	1250800000	37247000	799340000	58684000	355580000	30485000	128060000	29827000
protein_453	P24288	P24288	5	5	5	Branched-chain-amino-acid aminotransferase, cytosolic	Bcat1	sp|P24288|BCAT1_MOUSE Branched-chain-amino-acid aminotransferase, cytosolic OS=Mus musculus OX=10090 GN=Bcat1 PE=1 SV=2	1	5	5	5	1	0	4	5	1	0	4	5	1	0	4	5	14.8	14.8	14.8	42.791	386	386	2.1		9	1		0	30.977	3.4	0	10.9	14.8	126040000	12922000	0	45099000	68015000	0	0	18001000
protein_454	P24369	P24369	6	6	6	Peptidyl-prolyl cis-trans isomerase B	Ppib	sp|P24369|PPIB_MOUSE Peptidyl-prolyl cis-trans isomerase B OS=Mus musculus OX=10090 GN=Ppib PE=1 SV=2	1	6	6	6	4	6	3	3	4	6	3	3	4	6	3	3	31.9	31.9	31.9	23.713	216	216	3.61			7	11	0	41.556	21.8	31.9	14.4	14.4	296530000	75506000	134140000	44774000	42108000	163740000	121710000	182800000
protein_455	P24472;P30115;P13745	P24472	5;1;1	5;1;1	5;1;1	Glutathione S-transferase A4	Gsta4	sp|P24472|GSTA4_MOUSE Glutathione S-transferase A4 OS=Mus musculus OX=10090 GN=Gsta4 PE=1 SV=3	3	5	5	5	5	4	4	4	5	4	4	4	5	4	4	4	22.5	22.5	22.5	25.564	222	222;221;223	3.05			18	1	0	50.037	22.5	18.5	18.9	18.9	643610000	206890000	187290000	153750000	95686000	222490000	227900000	131530000
protein_458	P24668	P24668	2	2	2	Cation-dependent mannose-6-phosphate receptor	M6pr	sp|P24668|MPRD_MOUSE Cation-dependent mannose-6-phosphate receptor OS=Mus musculus OX=10090 GN=M6pr PE=1 SV=1	1	2	2	2	0	0	2	2	0	0	2	2	0	0	2	2	7.9	7.9	7.9	31.172	278	278	2		4			0.0010712	12.547	0	0	7.9	7.9	63404000	0	0	28138000	35266000	0	0	24501000
protein_459	P25444	P25444	8	8	8	40S ribosomal protein S2	Rps2	sp|P25444|RS2_MOUSE 40S ribosomal protein S2 OS=Mus musculus OX=10090 GN=Rps2 PE=1 SV=3	1	8	8	8	3	7	4	5	3	7	4	5	3	7	4	5	30.7	30.7	30.7	31.231	293	293	2.87	1	2	19	1	0	77.606	14	27	16	21.8	820550000	158460000	412910000	104460000	144720000	227380000	230800000	113340000
protein_463	P26443	P26443	20	20	20	Glutamate dehydrogenase 1, mitochondrial	Glud1	sp|P26443|DHE3_MOUSE Glutamate dehydrogenase 1, mitochondrial OS=Mus musculus OX=10090 GN=Glud1 PE=1 SV=1	1	20	20	20	16	15	18	18	16	15	18	18	16	15	18	18	39.6	39.6	39.6	61.336	558	558	2.44	6	60	44	7	0	267.83	34.2	33	38	36.7	8991400000	1968200000	887600000	2752900000	3382700000	1008700000	614950000	598870000
protein_467	P26883	P26883	2	2	2	Peptidyl-prolyl cis-trans isomerase FKBP1A	Fkbp1a	sp|P26883|FKB1A_MOUSE Peptidyl-prolyl cis-trans isomerase FKBP1A OS=Mus musculus OX=10090 GN=Fkbp1a PE=1 SV=2	1	2	2	2	2	2	2	1	2	2	2	1	2	2	2	1	25	25	25	11.922	108	108	3.63	2		1	16	0	54.71	25	25	25	12	2449300000	606000000	1239500000	316270000	287500000	1750800000	1254000000	1439700000
protein_475	P27773	P27773	21	21	21	Protein disulfide-isomerase A3	Pdia3	sp|P27773|PDIA3_MOUSE Protein disulfide-isomerase A3 OS=Mus musculus OX=10090 GN=Pdia3 PE=1 SV=2	1	21	21	21	5	3	17	18	5	3	17	18	5	3	17	18	46.1	46.1	46.1	56.678	505	505	2.04		44	2		0	191.12	8.9	7.1	39.6	43.4	2266900000	50752000	40652000	1098300000	1077100000	63155000	51288000	186190000
protein_479	P28652	P28652	15	10	5	Calcium/calmodulin-dependent protein kinase type II subunit beta	Camk2b	sp|P28652|KCC2B_MOUSE Calcium/calmodulin-dependent protein kinase type II subunit beta OS=Mus musculus OX=10090 GN=Camk2b PE=1 SV=2	1	15	10	5	10	11	13	12	5	6	8	7	2	3	3	4	30.6	21.2	14.8	60.46	542	542	2.28	6	26	11	4	0	323.31	18.1	21.6	22.9	25.8	4310200000	388980000	376630000	1740300000	1804400000	449110000	133930000	552220000
protein_480	P28656	P28656	7	7	6	Nucleosome assembly protein 1-like 1	Nap1l1	sp|P28656|NP1L1_MOUSE Nucleosome assembly protein 1-like 1 OS=Mus musculus OX=10090 GN=Nap1l1 PE=1 SV=2	1	7	7	6	4	3	5	5	4	3	5	5	3	2	4	4	17.6	17.6	15.1	45.345	391	391	2.45		14	6	2	0	42.973	10	11.5	13	10.2	561520000	103650000	34707000	214010000	209160000	141490000	63241000	89176000
protein_484	P28663	P28663	19	19	16	Beta-soluble NSF attachment protein	Napb	sp|P28663|SNAB_MOUSE Beta-soluble NSF attachment protein OS=Mus musculus OX=10090 GN=Napb PE=1 SV=2	1	19	19	16	10	18	16	12	10	18	16	12	8	15	13	10	58.4	58.4	47	33.557	298	298	3.01			74	1	0	323.31	45	52.3	51.7	53.7	8662600000	886850000	3528600000	3446300000	800830000	888700000	1531500000	1298700000
protein_490	P29341	P29341	15	15	15	Polyadenylate-binding protein 1	Pabpc1	sp|P29341|PABP1_MOUSE Polyadenylate-binding protein 1 OS=Mus musculus OX=10090 GN=Pabpc1 PE=1 SV=2	1	15	15	15	2	2	8	13	2	2	8	13	2	2	8	13	24.7	24.7	24.7	70.67	636	636	2	2	23	2		0	96.117	3.6	2.7	14.2	23.3	724110000	25181000	16340000	232390000	450200000	0	0	68204000
protein_495	P30275;Q6P8J7	P30275	9;1	9;1	9;1	Creatine kinase U-type, mitochondrial	Ckmt1	sp|P30275|KCRU_MOUSE Creatine kinase U-type, mitochondrial OS=Mus musculus OX=10090 GN=Ckmt1 PE=1 SV=1	2	9	9	9	6	4	9	8	6	4	9	8	6	4	9	8	17.9	17.9	17.9	47.003	418	418;419	2.29	6	30	11	5	0	114.1	13.9	10.5	17.9	17.7	5731800000	1395000000	375370000	1994100000	1967300000	1289300000	898150000	782120000
protein_501	P31650	P31650	5	5	5	Sodium- and chloride-dependent GABA transporter 3	Slc6a11	sp|P31650|S6A11_MOUSE Sodium- and chloride-dependent GABA transporter 3 OS=Mus musculus OX=10090 GN=Slc6a11 PE=1 SV=2	1	5	5	5	2	4	4	4	2	4	4	4	2	4	4	4	9.3	9.3	9.3	69.96	627	627	1.45	12	10			0	41.162	2.9	7.2	6.9	6.9	687510000	64519000	181920000	149240000	291830000	191970000	75139000	91828000
protein_503	P31938	P31938	13	13	9	Dual specificity mitogen-activated protein kinase kinase 1	Map2k1	sp|P31938|MP2K1_MOUSE Dual specificity mitogen-activated protein kinase kinase 1 OS=Mus musculus OX=10090 GN=Map2k1 PE=1 SV=2	1	13	13	9	6	3	10	11	6	3	10	11	3	1	7	7	36.1	36.1	28.5	43.474	393	393	2.31		29	8	2	0	129.4	16	8.1	31	28	1632800000	189560000	39961000	711120000	692200000	192880000	118640000	184050000
protein_513	P34884	P34884	3	3	3	Macrophage migration inhibitory factor	Mif	sp|P34884|MIF_MOUSE Macrophage migration inhibitory factor OS=Mus musculus OX=10090 GN=Mif PE=1 SV=2	1	3	3	3	2	2	1	3	2	2	1	3	2	2	1	3	35.7	35.7	35.7	12.504	115	115	4				19	0	243.84	27.8	27.8	9.6	35.7	1236200000	330340000	664280000	72290000	169270000	459640000	438570000	280920000
protein_517	P35278	P35278	6	3	3	Ras-related protein Rab-5C	Rab5c	sp|P35278|RAB5C_MOUSE Ras-related protein Rab-5C OS=Mus musculus OX=10090 GN=Rab5c PE=1 SV=2	1	6	3	3	5	6	6	5	2	3	3	2	2	3	3	2	35.6	20.8	20.8	23.412	216	216	3.08			12	1	0	27.935	26.9	35.6	35.6	26.9	634830000	103690000	272540000	185290000	73311000	202550000	288390000	233110000
protein_518	P35279	P35279	10	10	3	Ras-related protein Rab-6A	Rab6a	sp|P35279|RAB6A_MOUSE Ras-related protein Rab-6A OS=Mus musculus OX=10090 GN=Rab6a PE=1 SV=4	1	10	10	3	9	9	8	7	9	9	8	7	3	2	1	1	42.3	42.3	13	23.59	208	208	2.89	4	3	43	5	0	257.31	38.9	42.3	35.1	31.7	9700900000	2256300000	3671400000	2098400000	1674800000	5843400000	5515500000	3402800000
protein_519	P35282	P35282	6	6	6	Ras-related protein Rab-21	Rab21	sp|P35282|RAB21_MOUSE Ras-related protein Rab-21 OS=Mus musculus OX=10090 GN=Rab21 PE=1 SV=4	1	6	6	6	4	5	5	3	4	5	5	3	4	5	5	3	33.8	33.8	33.8	24.106	222	222	3.05			19	1	0	321.51	23.4	29.3	27.9	17.6	342590000	54741000	152610000	100500000	34735000	68363000	95379000	55397000
protein_525	P35486	P35486	14	14	14	Pyruvate dehydrogenase E1 component subunit alpha, somatic form, mitochondrial	Pdha1	sp|P35486|ODPA_MOUSE Pyruvate dehydrogenase E1 component subunit alpha, somatic form, mitochondrial OS=Mus musculus OX=10090 GN=Pdha1 PE=1 SV=1	1	14	14	14	8	6	7	11	8	6	7	11	8	6	7	11	28.7	28.7	28.7	43.231	390	390	2.31	9	31	19	5	0	122.76	24.1	16.4	18.2	25.6	3899500000	931650000	401270000	1140500000	1426100000	592860000	400340000	369100000
protein_528	P35564	P35564	9	9	9	Calnexin	Canx	sp|P35564|CALX_MOUSE Calnexin OS=Mus musculus OX=10090 GN=Canx PE=1 SV=1	1	9	9	9	2	6	4	7	2	6	4	7	2	6	4	7	18.4	18.4	18.4	67.277	591	591	1.56	17	5	5		0	69.264	3.7	11.5	8	14.7	716820000	42762000	281110000	117050000	275910000	86519000	86608000	68666000
protein_530	P35700	P35700	9	9	8	Peroxiredoxin-1	Prdx1	sp|P35700|PRDX1_MOUSE Peroxiredoxin-1 OS=Mus musculus OX=10090 GN=Prdx1 PE=1 SV=1	1	9	9	8	8	9	7	8	8	9	7	8	7	8	6	7	36.2	36.2	32.2	22.176	199	199	3.29	3	1	35	26	0	323.31	35.7	36.2	32.2	35.7	4452500000	988860000	1846200000	841660000	775770000	665130000	1110300000	569270000
protein_531	P35802	P35802	8	8	8	Neuronal membrane glycoprotein M6-a	Gpm6a	sp|P35802|GPM6A_MOUSE Neuronal membrane glycoprotein M6-a OS=Mus musculus OX=10090 GN=Gpm6a PE=1 SV=1	1	8	8	8	3	6	7	5	3	6	7	5	3	6	7	5	18	18	18	31.149	278	278	2.42	10	6	26	1	0	323.31	11.5	15.5	18	11.9	31815000000	988750000	7349800000	17272000000	6204800000	6588900000	13422000000	17018000000
protein_532	P35803	P35803	5	5	5	Neuronal membrane glycoprotein M6-b	Gpm6b	sp|P35803|GPM6B_MOUSE Neuronal membrane glycoprotein M6-b OS=Mus musculus OX=10090 GN=Gpm6b PE=1 SV=2	1	5	5	5	2	5	2	3	2	5	2	3	2	5	2	3	15.5	15.5	15.5	36.209	328	328	2.2	6	4	10		0	79.488	7.9	15.5	7.9	10.4	1556700000	105080000	881460000	319160000	251030000	487990000	820690000	509330000
protein_534	P35980	P35980	5	5	5	60S ribosomal protein L18	Rpl18	sp|P35980|RL18_MOUSE 60S ribosomal protein L18 OS=Mus musculus OX=10090 GN=Rpl18 PE=1 SV=3	1	5	5	5	4	4	1	1	4	4	1	1	4	4	1	1	25	25	25	21.644	188	188	2.86	2		10	2	0	96.372	24.5	25	4.8	6.9	489430000	280900000	200830000	0	7707200	386440000	290990000	0
protein_539	P39053	P39053	46	46	36	Dynamin-1	Dnm1	sp|P39053|DYN1_MOUSE Dynamin-1 OS=Mus musculus OX=10090 GN=Dnm1 PE=1 SV=2	1	46	46	36	25	44	33	42	25	44	33	42	18	34	23	32	47.2	47.2	36.1	97.802	867	867	1.74	183	70	56	20	0	323.31	26	47.1	37.7	42.8	32660000000	3544700000	12664000000	6124400000	10327000000	1031400000	1176000000	1128800000
protein_543	P40142	P40142	14	14	14	Transketolase	Tkt	sp|P40142|TKT_MOUSE Transketolase OS=Mus musculus OX=10090 GN=Tkt PE=1 SV=1	1	14	14	14	4	5	13	12	4	5	13	12	4	5	13	12	23.8	23.8	23.8	67.63	623	623	2.16	6	28	9	2	0	130.62	8.2	9.6	20.9	20.9	2116800000	181120000	136800000	770760000	1028100000	193210000	66236000	183490000
protein_547	P41216	P41216	8	8	6	Long-chain-fatty-acid--CoA ligase 1	Acsl1	sp|P41216|ACSL1_MOUSE Long-chain-fatty-acid--CoA ligase 1 OS=Mus musculus OX=10090 GN=Acsl1 PE=1 SV=2	1	8	8	6	0	1	5	7	0	1	5	7	0	1	3	5	12.2	12.2	9.3	77.951	699	699	1.92	1	12			0	48.098	0	1	7	11	192760000	0	9759800	59912000	123080000	0	0	21110000
protein_550	P42669	P42669	5	5	5	Transcriptional activator protein Pur-alpha	Pura	sp|P42669|PURA_MOUSE Transcriptional activator protein Pur-alpha OS=Mus musculus OX=10090 GN=Pura PE=1 SV=1	1	5	5	5	2	3	3	4	2	3	3	4	2	3	3	4	29.3	29.3	29.3	34.883	321	321	2.33		11	3	1	0	53.663	5.3	12.5	12.5	22.1	1179800000	100790000	86021000	497050000	495930000	219980000	298440000	305280000
protein_552	P42932	P42932	19	19	19	T-complex protein 1 subunit theta	Cct8	sp|P42932|TCPQ_MOUSE T-complex protein 1 subunit theta OS=Mus musculus OX=10090 GN=Cct8 PE=1 SV=3	1	19	19	19	6	6	11	18	6	6	11	18	6	6	11	18	36.9	36.9	36.9	59.555	548	548	2.27		35	8	2	0	139.48	13.1	12.6	21	35.2	1368400000	121700000	66807000	439950000	739920000	89702000	111380000	105490000
protein_553	P43006	P43006	11	11	11	Excitatory amino acid transporter 2	Slc1a2	sp|P43006|EAA2_MOUSE Excitatory amino acid transporter 2 OS=Mus musculus OX=10090 GN=Slc1a2 PE=1 SV=1	1	11	11	11	6	10	9	11	6	10	9	11	6	10	9	11	19.9	19.9	19.9	62.03	572	572	1.73	42	34	10	4	0	323.31	11.9	16.1	17.7	19.9	17872000000	673690000	3295200000	5520800000	8382700000	2076300000	1489500000	1653000000
protein_555	P43274	P43274	5	5	2	Histone H1.4	Hist1h1e	sp|P43274|H14_MOUSE Histone H1.4 OS=Mus musculus OX=10090 GN=H1-4 PE=1 SV=2	1	5	5	2	3	3	3	4	3	3	3	4	1	1	0	1	22.4	22.4	12.8	21.977	219	219	2.39	3	6	8	1	0	34.078	14.6	16.4	9.6	15.1	569920000	200690000	125010000	52636000	191580000	384110000	165930000	71110000
protein_560	P45952	P45952	5	5	5	Medium-chain specific acyl-CoA dehydrogenase, mitochondrial	Acadm	sp|P45952|ACADM_MOUSE Medium-chain specific acyl-CoA dehydrogenase, mitochondrial OS=Mus musculus OX=10090 GN=Acadm PE=1 SV=1	1	5	5	5	1	0	3	5	1	0	3	5	1	0	3	5	14.5	14.5	14.5	46.481	421	421	2.11		8	1		0	34.562	3.6	0	9.3	14.5	126540000	12278000	0	53010000	61249000	0	0	28789000
protein_562	P46096	P46096	17	17	11	Synaptotagmin-1	Syt1	sp|P46096|SYT1_MOUSE Synaptotagmin-1 OS=Mus musculus OX=10090 GN=Syt1 PE=1 SV=1	1	17	17	11	14	12	14	17	14	12	14	17	9	8	9	11	44.4	44.4	32.3	47.417	421	421	2.45	11	71	42	16	0	323.31	33.3	30.4	33.3	44.4	18757000000	3954500000	1525600000	5974700000	7301800000	1837300000	1652300000	1427400000
protein_564	P46460	P46460	41	41	41	Vesicle-fusing ATPase	Nsf	sp|P46460|NSF_MOUSE Vesicle-fusing ATPase OS=Mus musculus OX=10090 GN=Nsf PE=1 SV=2	1	41	41	41	22	38	30	34	22	38	30	34	22	38	30	34	50.7	50.7	50.7	82.613	744	744	1.87	122	102	51	16	0	323.31	27.8	46.5	35.3	44.5	24369000000	2547100000	7148300000	7161800000	7511800000	904880000	733180000	848930000
protein_566	P46638;P62492;Q9WTL2	P46638;P62492	13;11;1	13;11;1	13;11;1	Ras-related protein Rab-11B;Ras-related protein Rab-11A	Rab11b;Rab11a	sp|P46638|RB11B_MOUSE Ras-related protein Rab-11B OS=Mus musculus OX=10090 GN=Rab11b PE=1 SV=3;sp|P62492|RB11A_MOUSE Ras-related protein Rab-11A OS=Mus musculus OX=10090 GN=Rab11a PE=1 SV=3	3	13	13	13	7	13	9	9	7	13	9	9	7	13	9	9	59.2	59.2	59.2	24.489	218	218;216;213	3.12			45	6	0	139.32	31.2	59.2	43.1	45.9	4204600000	699070000	1804000000	1133700000	567810000	820730000	724910000	557780000
protein_573	P47754;P47753	P47754	11;2	11;2	11;2	F-actin-capping protein subunit alpha-2	Capza2	sp|P47754|CAZA2_MOUSE F-actin-capping protein subunit alpha-2 OS=Mus musculus OX=10090 GN=Capza2 PE=1 SV=3	2	11	11	11	5	9	9	6	5	9	9	6	5	9	9	6	54.2	54.2	54.2	32.967	286	286;286	2.92		6	30	3	0	123.84	25.9	40.6	48.6	30.1	2572500000	337900000	534300000	1164800000	535530000	404530000	354150000	697140000
protein_574	P47757	P47757	8	8	8	F-actin-capping protein subunit beta	Capzb	sp|P47757|CAPZB_MOUSE F-actin-capping protein subunit beta OS=Mus musculus OX=10090 GN=Capzb PE=1 SV=3	1	8	8	8	3	7	6	4	3	7	6	4	3	7	6	4	30.3	30.3	30.3	31.345	277	277	3	1		21	2	0	168.3	8.7	27.1	23.1	13.7	1967500000	308090000	764400000	638160000	256870000	539900000	706670000	533770000
protein_578	P47857	P47857	23	23	20	ATP-dependent 6-phosphofructokinase, muscle type	Pfkm	sp|P47857|PFKAM_MOUSE ATP-dependent 6-phosphofructokinase, muscle type OS=Mus musculus OX=10090 GN=Pfkm PE=1 SV=3	1	23	23	20	12	22	15	19	12	22	15	19	10	19	12	16	35.9	35.9	32.4	85.268	780	780	1.51	78	24	14	3	0	269.26	19.5	32.9	21.5	28.8	5791900000	403600000	2632800000	921600000	1833900000	253870000	285290000	180650000
protein_579	P47911	P47911	8	8	8	60S ribosomal protein L6	Rpl6	sp|P47911|RL6_MOUSE 60S ribosomal protein L6 OS=Mus musculus OX=10090 GN=Rpl6 PE=1 SV=3	1	8	8	8	4	7	5	6	4	7	5	6	4	7	5	6	27	27	27	33.509	296	296	2.67	3	6	23	1	0	53.932	14.5	26.7	14.9	19.9	642500000	104360000	221140000	179190000	137820000	117270000	142920000	111630000
protein_583	P47963	P47963	6	6	6	60S ribosomal protein L13	Rpl13	sp|P47963|RL13_MOUSE 60S ribosomal protein L13 OS=Mus musculus OX=10090 GN=Rpl13 PE=1 SV=3	1	6	6	6	4	6	6	4	4	6	6	4	4	6	6	4	29.4	29.4	29.4	24.305	211	211	2.78	3	2	20	2	0	323.31	19.4	29.4	29.4	19	738950000	185050000	331960000	151530000	70416000	298900000	184500000	88901000
protein_586	P48036	P48036	14	14	14	Annexin A5	Anxa5	sp|P48036|ANXA5_MOUSE Annexin A5 OS=Mus musculus OX=10090 GN=Anxa5 PE=1 SV=1	1	14	14	14	7	13	9	5	7	13	9	5	7	13	9	5	45.1	45.1	45.1	35.752	319	319	3.08			35	3	0	218.63	22.3	41.1	30.7	14.4	1601400000	275800000	731960000	416460000	177200000	163740000	290650000	192740000
protein_587	P48318	P48318	6	6	5	Glutamate decarboxylase 1	Gad1	sp|P48318|DCE1_MOUSE Glutamate decarboxylase 1 OS=Mus musculus OX=10090 GN=Gad1 PE=1 SV=2	1	6	6	5	0	0	4	4	0	0	4	4	0	0	3	3	14.3	14.3	12.6	66.648	593	593	2		9			0	45.967	0	0	8.8	8.8	152130000	0	0	64570000	87561000	0	0	45822000
protein_588	P48320	P48320	6	5	5	Glutamate decarboxylase 2	Gad2	sp|P48320|DCE2_MOUSE Glutamate decarboxylase 2 OS=Mus musculus OX=10090 GN=Gad2 PE=1 SV=1	1	6	5	5	0	0	3	6	0	0	2	5	0	0	2	5	10.8	9.1	9.1	65.223	585	585	2		7			0	30.917	0	0	5.5	10.8	158380000	0	0	44326000	114060000	0	0	56389000
protein_591	P48722	P48722	13	12	12	Heat shock 70 kDa protein 4L	Hspa4l	sp|P48722|HS74L_MOUSE Heat shock 70 kDa protein 4L OS=Mus musculus OX=10090 GN=Hspa4l PE=1 SV=2	1	13	12	12	2	12	5	7	2	11	5	7	2	11	5	7	18.7	16.8	16.8	94.381	838	838	1.22	27	3	2		0	94.12	2.7	17.1	6.9	9.5	947620000	19236000	556780000	88004000	283600000	57767000	138720000	70411000
protein_592	P48758	P48758	16	16	15	Carbonyl reductase [NADPH] 1	Cbr1	sp|P48758|CBR1_MOUSE Carbonyl reductase [NADPH] 1 OS=Mus musculus OX=10090 GN=Cbr1 PE=1 SV=3	1	16	16	15	8	13	10	10	8	13	10	10	7	12	9	9	57.4	57.4	54.5	30.641	277	277	3.02			43	1	0	126.82	31.4	45.8	36.8	35.4	2007000000	281550000	916400000	480440000	328580000	236240000	328050000	246560000
protein_594	P48774	P48774	8	7	7	Glutathione S-transferase Mu 5	Gstm5	sp|P48774|GSTM5_MOUSE Glutathione S-transferase Mu 5 OS=Mus musculus OX=10090 GN=Gstm5 PE=1 SV=1	1	8	7	7	6	7	5	5	5	6	4	4	5	6	4	4	38.4	34.4	34.4	26.635	224	224	3.1			19	2	0	85.899	27.7	31.2	23.2	22.3	1329900000	281360000	522830000	352420000	173260000	517980000	464550000	329110000
protein_595	P48962;Q3V132	P48962	17;3	17;3	9;0	ADP/ATP translocase 1	Slc25a4	sp|P48962|ADT1_MOUSE ADP/ATP translocase 1 OS=Mus musculus OX=10090 GN=Slc25a4 PE=1 SV=4	2	17	17	9	14	15	14	12	14	15	14	12	7	9	7	7	49.3	49.3	25.5	32.904	298	298;320	2.58	48	25	70	43	0	323.31	44.3	43.3	39.6	36.6	60688000000	9491700000	23308000000	16878000000	11011000000	4336400000	10674000000	7538000000
protein_597	P49312	P49312	9	9	9	Heterogeneous nuclear ribonucleoprotein A1;Heterogeneous nuclear ribonucleoprotein A1, N-terminally processed	Hnrnpa1	sp|P49312|ROA1_MOUSE Heterogeneous nuclear ribonucleoprotein A1 OS=Mus musculus OX=10090 GN=Hnrnpa1 PE=1 SV=2	1	9	9	9	4	4	4	8	4	4	4	8	4	4	4	8	28.8	28.8	28.8	34.196	320	320	2.88		3	22		0	62.626	15.3	9.4	15.6	28.8	884580000	168210000	165830000	283910000	266630000	210340000	173220000	166440000
protein_603	P50247	P50247	8	8	8	Adenosylhomocysteinase	Ahcy	sp|P50247|SAHH_MOUSE Adenosylhomocysteinase OS=Mus musculus OX=10090 GN=Ahcy PE=1 SV=3	1	8	8	8	1	0	7	6	1	0	7	6	1	0	7	6	20.6	20.6	20.6	47.688	432	432	2.07		13	1		0	53.784	2.5	0	17.8	15.5	311760000	7529200	0	160110000	144120000	0	0	66020000
protein_604	P50396	P50396	20	20	15	Rab GDP dissociation inhibitor alpha	Gdi1	sp|P50396|GDIA_MOUSE Rab GDP dissociation inhibitor alpha OS=Mus musculus OX=10090 GN=Gdi1 PE=1 SV=3	1	20	20	15	10	9	15	19	10	9	15	19	6	5	11	15	49.2	49.2	38.5	50.521	447	447	2.49	3	52	18	14	0	223.87	23.7	21.7	44.5	49.2	8350500000	807240000	614970000	3328700000	3599600000	653340000	478250000	699600000
protein_606	P50516	P50516	33	33	33	V-type proton ATPase catalytic subunit A	Atp6v1a	sp|P50516|VATA_MOUSE V-type proton ATPase catalytic subunit A OS=Mus musculus OX=10090 GN=Atp6v1a PE=1 SV=2	1	33	33	33	16	19	28	27	16	19	28	27	16	19	28	27	57.7	57.7	57.7	68.325	617	617	2.13	30	109	28	13	0	323.31	28.8	32.4	53.5	48	18920000000	1999400000	1421000000	7208100000	8291900000	1222800000	568350000	1415900000
protein_607	P50518;Q9D593	P50518	15;4	15;4	15;4	V-type proton ATPase subunit E 1	Atp6v1e1	sp|P50518|VATE1_MOUSE V-type proton ATPase subunit E 1 OS=Mus musculus OX=10090 GN=Atp6v1e1 PE=1 SV=2	2	15	15	15	10	14	13	11	10	14	13	11	10	14	13	11	62.4	62.4	62.4	26.157	226	226;226	3.06		1	61	5	0	221.53	41.6	50	50	53.1	8119300000	1264700000	2722800000	3019200000	1112500000	1412000000	1885400000	1907600000
protein_608	P50544	P50544	7	7	7	Very long-chain specific acyl-CoA dehydrogenase, mitochondrial	Acadvl	sp|P50544|ACADV_MOUSE Very long-chain specific acyl-CoA dehydrogenase, mitochondrial OS=Mus musculus OX=10090 GN=Acadvl PE=1 SV=3	1	7	7	7	0	0	5	7	0	0	5	7	0	0	5	7	11.6	11.6	11.6	70.875	656	656	2		12			0	41.621	0	0	8.5	11.6	160130000	0	0	58789000	101340000	0	0	30179000
protein_610	P50580	P50580	5	5	5	Proliferation-associated protein 2G4	Pa2g4	sp|P50580|PA2G4_MOUSE Proliferation-associated protein 2G4 OS=Mus musculus OX=10090 GN=Pa2g4 PE=1 SV=3	1	5	5	5	1	0	3	4	1	0	3	4	1	0	3	4	14.7	14.7	14.7	43.698	394	394	2.25		7		1	0	30.477	2	0	7.6	12.7	121690000	4139600	0	40685000	76863000	0	0	21368000
protein_611	P51150	P51150	12	12	12	Ras-related protein Rab-7a	Rab7a	sp|P51150|RAB7A_MOUSE Ras-related protein Rab-7a OS=Mus musculus OX=10090 GN=Rab7a PE=1 SV=2	1	12	12	12	7	12	7	6	7	12	7	6	7	12	7	6	64.3	64.3	64.3	23.489	207	207	3.35	1		31	20	0	202.18	36.2	64.3	38.2	35.7	3459500000	708230000	1764500000	577790000	408970000	524710000	776460000	340020000
protein_612	P51174	P51174	5	5	5	Long-chain specific acyl-CoA dehydrogenase, mitochondrial	Acadl	sp|P51174|ACADL_MOUSE Long-chain specific acyl-CoA dehydrogenase, mitochondrial OS=Mus musculus OX=10090 GN=Acadl PE=1 SV=2	1	5	5	5	0	0	4	5	0	0	4	5	0	0	4	5	12.8	12.8	12.8	47.907	430	430	2		9			0	64.846	0	0	10.7	12.8	241880000	0	0	128460000	113430000	0	0	60002000
protein_613	P51410	P51410	5	5	5	60S ribosomal protein L9	Rpl9	sp|P51410|RL9_MOUSE 60S ribosomal protein L9 OS=Mus musculus OX=10090 GN=Rpl9 PE=1 SV=2	1	5	5	5	4	5	1	1	4	5	1	1	4	5	1	1	26.6	26.6	26.6	21.881	192	192	3			11		0	46.509	16.7	26.6	5.2	7.3	531650000	102190000	337230000	49539000	42693000	249760000	258280000	0
protein_615	P51660	P51660	5	5	5	Peroxisomal multifunctional enzyme type 2;(3R)-hydroxyacyl-CoA dehydrogenase;Enoyl-CoA hydratase 2	Hsd17b4	sp|P51660|DHB4_MOUSE Peroxisomal multifunctional enzyme type 2 OS=Mus musculus OX=10090 GN=Hsd17b4 PE=1 SV=3	1	5	5	5	3	5	4	4	3	5	4	4	3	5	4	4	7.2	7.2	7.2	79.481	735	735	2.64	4	1	16	1	0	40.667	4.5	7.2	6.1	6.1	224170000	25128000	96504000	56956000	45576000	30167000	54794000	47061000
protein_618	P51863	P51863	10	10	10	V-type proton ATPase subunit d 1	Atp6v0d1	sp|P51863|VA0D1_MOUSE V-type proton ATPase subunit d 1 OS=Mus musculus OX=10090 GN=Atp6v0d1 PE=1 SV=2	1	10	10	10	5	7	7	6	5	7	7	6	5	7	7	6	31.3	31.3	31.3	40.301	351	351	2.8	4	10	28	8	0	95.282	14.2	20.8	21.4	21.9	4334800000	699270000	749380000	1637900000	1248300000	588790000	414910000	999720000
protein_619	P51881	P51881	14	6	6	ADP/ATP translocase 2;ADP/ATP translocase 2, N-terminally processed	Slc25a5	sp|P51881|ADT2_MOUSE ADP/ATP translocase 2 OS=Mus musculus OX=10090 GN=Slc25a5 PE=1 SV=3	1	14	6	6	12	11	13	10	5	5	6	5	5	5	6	5	41.3	17.4	17.4	32.931	298	298	2.52	19	12	27	15	0	137.12	40.6	35.2	35.9	32.9	16262000000	3242500000	7793200000	2671600000	2554500000	2858700000	4986800000	2517900000
protein_620	P52196	P52196	6	6	6	Thiosulfate sulfurtransferase	Tst	sp|P52196|THTR_MOUSE Thiosulfate sulfurtransferase OS=Mus musculus OX=10090 GN=Tst PE=1 SV=3	1	6	6	6	6	6	5	5	6	6	5	5	6	6	5	5	26.9	26.9	26.9	33.466	297	297	3.05			21	1	0	54.342	26.9	26.9	20.5	23.6	1057900000	205130000	378740000	279290000	194720000	192720000	261350000	259070000
protein_621	P52480;P53657	P52480	31;1	31;1	31;1	Pyruvate kinase PKM	Pkm	sp|P52480|KPYM_MOUSE Pyruvate kinase PKM OS=Mus musculus OX=10090 GN=Pkm PE=1 SV=4	2	31	31	31	17	20	25	30	17	20	25	30	17	20	25	30	57.6	57.6	57.6	57.844	531	531;574	2.24	45	111	41	29	0	323.31	37.9	43.9	45.8	57.6	38242000000	3737200000	3152100000	16096000000	15256000000	1576100000	1862100000	2328100000
protein_623	P52760	P52760	3	3	3	Ribonuclease UK114	Hrsp12	sp|P52760|RIDA_MOUSE 2-iminobutanoate/2-iminopropanoate deaminase OS=Mus musculus OX=10090 GN=Rida PE=1 SV=3	1	3	3	3	3	3	2	2	3	3	2	2	3	3	2	2	26.7	26.7	26.7	14.255	135	135	4				10	0	28.032	26.7	26.7	14.8	14.8	465900000	93879000	259900000	58827000	53291000	131320000	157590000	168290000
protein_625	P53026	P53026	7	7	7	60S ribosomal protein L10a	Rpl10a	sp|P53026|RL10A_MOUSE 60S ribosomal protein L10a OS=Mus musculus OX=10090 GN=Rpl10a PE=1 SV=3	1	7	7	7	5	5	4	3	5	5	4	3	5	5	4	3	27.6	27.6	27.6	24.916	217	217	3			18		0	45.542	25.8	27.6	16.1	13.4	601490000	154430000	268850000	90920000	87294000	192220000	268830000	121760000
protein_629	P53810	P53810	8	8	8	Phosphatidylinositol transfer protein alpha isoform	Pitpna	sp|P53810|PIPNA_MOUSE Phosphatidylinositol transfer protein alpha isoform OS=Mus musculus OX=10090 GN=Pitpna PE=1 SV=2	1	8	8	8	2	7	3	3	2	7	3	3	2	7	3	3	41.3	41.3	41.3	31.893	271	271	3			18		0	54.438	13.3	39.1	14.8	17.7	995600000	88832000	480920000	267800000	158040000	222130000	365100000	211770000
protein_631	P53994	P53994	10	10	4	Ras-related protein Rab-2A	Rab2a	sp|P53994|RAB2A_MOUSE Ras-related protein Rab-2A OS=Mus musculus OX=10090 GN=Rab2a PE=1 SV=1	1	10	10	4	10	9	6	6	10	9	6	6	4	3	2	2	55.2	55.2	24.5	23.547	212	212	3.23			40	12	0	133.22	55.2	48.6	34.4	34.4	2836800000	787970000	1383300000	376700000	288800000	564810000	652270000	279160000
protein_633	P54227	P54227	6	6	5	Stathmin	Stmn1	sp|P54227|STMN1_MOUSE Stathmin OS=Mus musculus OX=10090 GN=Stmn1 PE=1 SV=2	1	6	6	5	6	5	1	1	6	5	1	1	5	4	1	0	30.2	30.2	24.2	17.274	149	149	3.87			2	13	0	55.96	30.2	30.2	8.7	6	886030000	476410000	332830000	40118000	36672000	525010000	281650000	0
protein_634	P54285	P54285	5	5	4	Voltage-dependent L-type calcium channel subunit beta-3	Cacnb3	sp|P54285|CACB3_MOUSE Voltage-dependent L-type calcium channel subunit beta-3 OS=Mus musculus OX=10090 GN=Cacnb3 PE=1 SV=2	1	5	5	4	0	0	3	5	0	0	3	5	0	0	3	4	14	14	12	54.571	484	484	2		9			0	33.324	0	0	8.3	14	110670000	0	0	51447000	59228000	0	0	27986000
protein_636	P54775	P54775	5	5	5	26S protease regulatory subunit 6B	Psmc4	sp|P54775|PRS6B_MOUSE 26S proteasome regulatory subunit 6B OS=Mus musculus OX=10090 GN=Psmc4 PE=1 SV=2	1	5	5	5	1	1	3	4	1	1	3	4	1	1	3	4	12.9	12.9	12.9	47.408	418	418	2.22		7	2		0	30.007	3.1	2.2	7.9	10.3	129500000	9697400	6619000	48819000	64367000	0	0	26404000
protein_640	P55066	P55066	11	11	11	Neurocan core protein	Ncan	sp|P55066|NCAN_MOUSE Neurocan core protein OS=Mus musculus OX=10090 GN=Ncan PE=1 SV=1	1	11	11	11	4	7	8	9	4	7	8	9	4	7	8	9	9	9	9	137.2	1268	1268	1.46	26	3	5	1	0	239.49	3.2	6.3	6.3	7.2	1040600000	91381000	439230000	229620000	280410000	176710000	126240000	134610000
protein_643	P55264	P55264	4	4	4	Adenosine kinase	Adk	sp|P55264|ADK_MOUSE Adenosine kinase OS=Mus musculus OX=10090 GN=Adk PE=1 SV=2	1	4	4	4	1	0	4	3	1	0	4	3	1	0	4	3	8.6	8.6	8.6	40.148	361	361	2.12		7	1		0	30.83	3	0	8.6	8.3	124550000	2994500	0	53955000	67604000	0	0	31606000
protein_645	P55821	P55821	3	2	2	Stathmin-2	Stmn2	sp|P55821|STMN2_MOUSE Stathmin-2 OS=Mus musculus OX=10090 GN=Stmn2 PE=1 SV=1	1	3	2	2	3	3	1	1	2	2	1	0	2	2	1	0	16.2	11.2	11.2	20.828	179	179	3.6			2	3	0	38.502	16.2	16.2	5.6	5	288050000	36292000	70373000	181380000	0	105660000	99637000	0
protein_646	P56135	P56135	4	4	4	ATP synthase subunit f, mitochondrial	Atp5j2	sp|P56135|ATPK_MOUSE ATP synthase subunit f, mitochondrial OS=Mus musculus OX=10090 GN=Atp5mf PE=1 SV=3	1	4	4	4	4	4	3	2	4	4	3	2	4	4	3	2	36.4	36.4	36.4	10.344	88	88	3.45	3	1		16	0	48.236	36.4	36.4	23.9	23.9	2821300000	734820000	1348600000	399560000	338320000	1469100000	979650000	1068900000
protein_653	P56391	P56391	2	2	2	Cytochrome c oxidase subunit 6B1	Cox6b1	sp|P56391|CX6B1_MOUSE Cytochrome c oxidase subunit 6B1 OS=Mus musculus OX=10090 GN=Cox6b1 PE=1 SV=2	1	2	2	2	2	2	2	2	2	2	2	2	2	2	2	2	11.6	11.6	11.6	10.071	86	86	4				8	0.0012563	17.966	11.6	11.6	11.6	11.6	752130000	259680000	298920000	92910000	100610000	445050000	282700000	252190000
protein_654	P56395	P56395	3	3	3	Cytochrome b5	Cyb5a	sp|P56395|CYB5_MOUSE Cytochrome b5 OS=Mus musculus OX=10090 GN=Cyb5a PE=1 SV=2	1	3	3	3	3	3	2	3	3	3	2	3	3	3	2	3	25.4	25.4	25.4	15.241	134	134	4				11	0	42.539	25.4	25.4	15.7	25.4	437630000	116850000	208700000	35716000	76364000	165480000	173690000	184640000
protein_655	P56399	P56399	17	17	17	Ubiquitin carboxyl-terminal hydrolase 5	Usp5	sp|P56399|UBP5_MOUSE Ubiquitin carboxyl-terminal hydrolase 5 OS=Mus musculus OX=10090 GN=Usp5 PE=1 SV=1	1	17	17	17	5	16	5	10	5	16	5	10	5	16	5	10	26.1	26.1	26.1	95.832	858	858	1.63	31	8	7	3	0	148.53	8.2	24.2	7.9	14.8	1448200000	137860000	791840000	230550000	287960000	164300000	119180000	147090000
protein_656	P56480	P56480	23	23	23	ATP synthase subunit beta, mitochondrial	Atp5b	sp|P56480|ATPB_MOUSE ATP synthase subunit beta, mitochondrial OS=Mus musculus OX=10090 GN=Atp5f1b PE=1 SV=2	1	23	23	23	17	20	22	23	17	20	22	23	17	20	22	23	66	66	66	56.3	529	529	2.44	20	128	75	27	0	323.31	38.9	48.8	62.9	66	70132000000	11112000000	5810700000	24524000000	28684000000	2964600000	2491100000	2620800000
protein_657	P56564;O35544	P56564	4;1	4;1	4;1	Excitatory amino acid transporter 1	Slc1a3	sp|P56564|EAA1_MOUSE Excitatory amino acid transporter 1 OS=Mus musculus OX=10090 GN=Slc1a3 PE=1 SV=2	2	4	4	4	2	4	3	4	2	4	3	4	2	4	3	4	10.7	10.7	10.7	59.622	543	543;561	1.61	16	14	3		0	115.11	6.4	10.7	8.5	10.7	5273500000	372590000	784650000	1864400000	2251900000	1503100000	920640000	970950000
protein_659	P56812	P56812	2	2	2	Programmed cell death protein 5	Pdcd5	sp|P56812|PDCD5_MOUSE Programmed cell death protein 5 OS=Mus musculus OX=10090 GN=Pdcd5 PE=1 SV=3	1	2	2	2	2	2	0	0	2	2	0	0	2	2	0	0	16.7	16.7	16.7	14.275	126	126	4				4	0.0011299	13.994	16.7	16.7	0	0	47218000	25505000	21713000	0	0	54212000	21833000	0
protein_662	P57746	P57746	12	12	12	V-type proton ATPase subunit D	Atp6v1d	sp|P57746|VATD_MOUSE V-type proton ATPase subunit D OS=Mus musculus OX=10090 GN=Atp6v1d PE=1 SV=1	1	12	12	12	7	10	8	6	7	10	8	6	7	10	8	6	51	51	51	28.369	247	247	3.22			38	11	0	165.31	34.8	43.7	37.7	30.4	3270400000	746490000	1291500000	899580000	332790000	806980000	753270000	643450000
protein_665	P57780	P57780	37	24	23	Alpha-actinin-4	Actn4	sp|P57780|ACTN4_MOUSE Alpha-actinin-4 OS=Mus musculus OX=10090 GN=Actn4 PE=1 SV=1	1	37	24	23	9	35	20	23	4	22	10	13	4	21	10	12	40.8	27.1	26	104.98	912	912	1.34	47	4	5	2	0	179.73	11.4	39.9	22.6	26.1	1846600000	87029000	1082500000	208220000	468840000	81594000	172980000	83401000
protein_669	P58252	P58252	24	24	23	Elongation factor 2	Eef2	sp|P58252|EF2_MOUSE Elongation factor 2 OS=Mus musculus OX=10090 GN=Eef2 PE=1 SV=2	1	24	24	23	9	22	10	16	9	22	10	16	8	21	9	15	30	30	28.8	95.313	858	858	1.65	51	15	17	2	0	209.38	11.3	27.6	12.4	20	2471300000	189850000	1179100000	304530000	797850000	168370000	179770000	125410000
protein_682	P59999	P59999	5	5	5	Actin-related protein 2/3 complex subunit 4	Arpc4	sp|P59999|ARPC4_MOUSE Actin-related protein 2/3 complex subunit 4 OS=Mus musculus OX=10090 GN=Arpc4 PE=1 SV=3	1	5	5	5	5	4	4	4	5	4	4	4	5	4	4	4	29.8	29.8	29.8	19.667	168	168	3.32	2	2	9	15	0	51.287	29.8	22.6	22.6	25	3911100000	1340700000	1637900000	434040000	498410000	1094200000	1015100000	807630000
protein_683	P60122	P60122	4	4	4	RuvB-like 1	Ruvbl1	sp|P60122|RUVB1_MOUSE RuvB-like 1 OS=Mus musculus OX=10090 GN=Ruvbl1 PE=1 SV=1	1	4	4	4	0	0	2	4	0	0	2	4	0	0	2	4	11.4	11.4	11.4	50.213	456	456	2		6			0.00075988	24.459	0	0	5.7	11.4	53588000	0	0	20378000	33210000	0	0	15576000
protein_684	P60202	P60202	5	5	5	Myelin proteolipid protein	Plp1	sp|P60202|MYPR_MOUSE Myelin proteolipid protein OS=Mus musculus OX=10090 GN=Plp1 PE=1 SV=2	1	5	5	5	2	5	3	5	2	5	3	5	2	5	3	5	18.8	18.8	18.8	30.077	277	277	2.35	18	12	11	13	0	323.31	6.9	18.8	11.6	18.8	14598000000	285130000	6915800000	1807500000	5589800000	623180000	4014000000	1441200000
protein_685	P60229	P60229	2	2	2	Eukaryotic translation initiation factor 3 subunit E	Eif3e	sp|P60229|EIF3E_MOUSE Eukaryotic translation initiation factor 3 subunit E OS=Mus musculus OX=10090 GN=Eif3e PE=1 SV=1	1	2	2	2	0	0	2	2	0	0	2	2	0	0	2	2	3.8	3.8	3.8	52.22	445	445	2		4			0.0010504	12.333	0	0	3.8	3.8	19800000	0	0	6974900	12825000	0	0	5071200
protein_688	P60487	P60487	9	9	9	Pyridoxal phosphate phosphatase	Pdxp	sp|P60487|PLPP_MOUSE Chronophin OS=Mus musculus OX=10090 GN=Pdxp PE=1 SV=1	1	9	9	9	5	9	5	4	5	9	5	4	5	9	5	4	37	37	37	31.512	292	292	3.24			22	7	0	63.853	19.9	37	19.9	16.4	871510000	145590000	468760000	153710000	103450000	179870000	219350000	176130000
protein_690	P60710;P63260	P60710;P63260	19;19	19;19	6;6	Actin, cytoplasmic 1;Actin, cytoplasmic 1, N-terminally processed;Actin, cytoplasmic 2;Actin, cytoplasmic 2, N-terminally processed	Actb;Actg1	sp|P60710|ACTB_MOUSE Actin, cytoplasmic 1 OS=Mus musculus OX=10090 GN=Actb PE=1 SV=1;sp|P63260|ACTG_MOUSE Actin, cytoplasmic 2 OS=Mus musculus OX=10090 GN=Actg1 PE=1 SV=1	2	19	19	6	17	18	19	18	17	18	19	18	5	5	6	5	52.5	52.5	17.1	41.736	375	375;375	2.4	60	171	89	61	0	323.31	52.3	52.3	52.5	52.3	200120000000	37175000000	18078000000	76591000000	68272000000	18911000000	20053000000	19690000000
protein_692	P60843	P60843	12	5	5	Eukaryotic initiation factor 4A-I	Eif4a1	sp|P60843|IF4A1_MOUSE Eukaryotic initiation factor 4A-I OS=Mus musculus OX=10090 GN=Eif4a1 PE=1 SV=1	1	12	5	5	1	4	10	9	0	0	4	3	0	0	4	3	33.5	11.6	11.6	46.153	406	406	2		7			0	56.019	2.5	14.5	27.3	27.8	139810000	0	0	63261000	76546000	0	0	40307000
protein_693	P60867	P60867	3	3	3	40S ribosomal protein S20	Rps20	sp|P60867|RS20_MOUSE 40S ribosomal protein S20 OS=Mus musculus OX=10090 GN=Rps20 PE=1 SV=1	1	3	3	3	3	3	2	3	3	3	2	3	3	3	2	3	22.7	22.7	22.7	13.373	119	119	4				13	0	32.632	22.7	22.7	19.3	22.7	824410000	210050000	434260000	89405000	90690000	294390000	387290000	268520000
protein_694	P60879;O09044	P60879	19;1	19;1	19;1	Synaptosomal-associated protein 25	Snap25	sp|P60879|SNP25_MOUSE Synaptosomal-associated protein 25 OS=Mus musculus OX=10090 GN=Snap25 PE=1 SV=1	2	19	19	19	14	18	18	17	14	18	18	17	14	18	18	17	69.9	69.9	69.9	23.315	206	206;210	3.17			138	29	0	323.31	58.3	68.4	67	69.9	29387000000	4362100000	12714000000	8629100000	3682600000	4021300000	5410900000	3379400000
protein_695	P60904	P60904	8	8	8	DnaJ homolog subfamily C member 5	Dnajc5	sp|P60904|DNJC5_MOUSE DnaJ homolog subfamily C member 5 OS=Mus musculus OX=10090 GN=Dnajc5 PE=1 SV=1	1	8	8	8	5	7	5	4	5	7	5	4	5	7	5	4	37.4	37.4	37.4	22.101	198	198	2.56	6	5	28		0	153.15	34.8	37.4	37.4	24.7	6188700000	715530000	2073100000	2850200000	549870000	1474500000	2533500000	2140500000
protein_696	P61021	P61021	6	6	3	Ras-related protein Rab-5B	Rab5b	sp|P61021|RAB5B_MOUSE Ras-related protein Rab-5B OS=Mus musculus OX=10090 GN=Rab5b PE=1 SV=1	1	6	6	3	5	6	6	5	5	6	6	5	2	3	3	2	35.8	35.8	20.9	23.707	215	215	3.06	1		30	4	0	90.479	30.2	35.8	35.8	27	2581100000	654110000	895810000	659180000	371960000	1125000000	1051400000	941480000
protein_698	P61027	P61027	5	4	3	Ras-related protein Rab-10	Rab10	sp|P61027|RAB10_MOUSE Ras-related protein Rab-10 OS=Mus musculus OX=10090 GN=Rab10 PE=1 SV=1	1	5	4	3	4	5	4	4	3	4	3	3	3	3	2	3	25.5	20	16.5	22.541	200	200	3.06	1		13	3	0	37.963	22	25.5	19.5	22	1070100000	99620000	545770000	275570000	149120000	266510000	541940000	393990000
protein_703	P61089	P61089	6	6	6	Ubiquitin-conjugating enzyme E2 N	Ube2n	sp|P61089|UBE2N_MOUSE Ubiquitin-conjugating enzyme E2 N OS=Mus musculus OX=10090 GN=Ube2n PE=1 SV=1	1	6	6	6	4	6	4	5	4	6	4	5	4	6	4	5	48.7	48.7	48.7	17.138	152	152	3.95			1	21	0	323.31	33.6	48.7	33.6	43.4	2993000000	697930000	1354200000	562330000	378500000	1398900000	1162600000	831690000
protein_704	P61161	P61161	9	9	9	Actin-related protein 2	Actr2	sp|P61161|ARP2_MOUSE Actin-related protein 2 OS=Mus musculus OX=10090 GN=Actr2 PE=1 SV=1	1	9	9	9	2	4	5	8	2	4	5	8	2	4	5	8	29.2	29.2	29.2	44.76	394	394	2.38		17	5	2	0	82.703	6.3	14	15.5	27.4	939550000	124740000	42218000	335090000	437510000	246730000	105740000	182010000
protein_706	P61205;P84078;Q8BSL7	P61205;P84078;Q8BSL7	11;11;8	11;11;8	6;6;4	ADP-ribosylation factor 3;ADP-ribosylation factor 1;ADP-ribosylation factor 2	Arf3;Arf1;Arf2	sp|P61205|ARF3_MOUSE ADP-ribosylation factor 3 OS=Mus musculus OX=10090 GN=Arf3 PE=2 SV=2;sp|P84078|ARF1_MOUSE ADP-ribosylation factor 1 OS=Mus musculus OX=10090 GN=Arf1 PE=1 SV=2;sp|Q8BSL7|ARF2_MOUSE ADP-ribosylation factor 2 OS=Mus musculus OX=10090 GN=A	3	11	11	6	8	11	9	8	8	11	9	8	3	6	4	3	64.1	64.1	35.4	20.601	181	181;181;181	3.74	2		14	61	0	323.31	54.7	64.1	60.2	54.7	14763000000	3185000000	8710800000	1356900000	1510000000	2163100000	2853400000	2222300000
protein_708	P61226;Q8BU31	P61226	5;2	5;2	3;0	Ras-related protein Rap-2b	Rap2b	sp|P61226|RAP2B_MOUSE Ras-related protein Rap-2b OS=Mus musculus OX=10090 GN=Rap2b PE=1 SV=1	2	5	5	3	3	5	2	2	3	5	2	2	1	3	0	1	31.1	31.1	19.7	20.504	183	183;183	3.47			10	9	0	61.322	16.4	31.1	11.5	12.6	806690000	183200000	419930000	120710000	82846000	320180000	214700000	285490000
protein_710	P61264;Q00262	P61264	19;1	19;1	18;0	Syntaxin-1B	Stx1b	sp|P61264|STX1B_MOUSE Syntaxin-1B OS=Mus musculus OX=10090 GN=Stx1b PE=1 SV=1	2	19	19	18	12	19	14	16	12	19	14	16	12	18	13	16	56.9	56.9	54.5	33.244	288	288;289	2.93	1	11	87	6	0	323.31	43.8	56.9	51.7	49.3	24026000000	2665600000	10730000000	6664600000	3965600000	1547800000	3995500000	2803100000
protein_713	P61358	P61358	5	5	5	60S ribosomal protein L27	Rpl27	sp|P61358|RL27_MOUSE 60S ribosomal protein L27 OS=Mus musculus OX=10090 GN=Rpl27 PE=1 SV=2	1	5	5	5	5	4	3	3	5	4	3	3	5	4	3	3	43.4	43.4	43.4	15.798	136	136	4				16	0	59.043	43.4	36	29.4	29.4	984800000	241900000	549180000	112350000	81371000	314080000	324900000	231040000
protein_717	P61922	P61922	14	14	14	4-aminobutyrate aminotransferase, mitochondrial	Abat	sp|P61922|GABT_MOUSE 4-aminobutyrate aminotransferase, mitochondrial OS=Mus musculus OX=10090 GN=Abat PE=1 SV=1	1	14	14	14	6	3	9	14	6	3	9	14	6	3	9	14	38.4	38.4	38.4	56.451	500	500	2.4	2	29	8	6	0	119.68	16.4	9.2	26.6	38.4	3160500000	269950000	62040000	1015300000	1813200000	304010000	233310000	336750000
protein_721	P61979	P61979	15	15	15	Heterogeneous nuclear ribonucleoprotein K	Hnrnpk	sp|P61979|HNRPK_MOUSE Heterogeneous nuclear ribonucleoprotein K OS=Mus musculus OX=10090 GN=Hnrnpk PE=1 SV=1	1	15	15	15	7	5	11	13	7	5	11	13	7	5	11	13	38.2	38.2	38.2	50.976	463	463	2.29	3	32	16	1	0	143.27	17.7	14.9	26.8	36.1	2939900000	236440000	213950000	1186500000	1303000000	450460000	225250000	344310000
protein_722	P61982	P61982	11	6	6	14-3-3 protein gamma;14-3-3 protein gamma, N-terminally processed	Ywhag	sp|P61982|1433G_MOUSE 14-3-3 protein gamma OS=Mus musculus OX=10090 GN=Ywhag PE=1 SV=2	1	11	6	6	10	10	10	9	6	6	6	5	6	6	6	5	45.7	29.6	29.6	28.302	247	247	3	1	1	35	3	0	308.55	42.9	43.3	42.9	34.8	22911000000	3830100000	8823200000	6986400000	3271200000	4914200000	6836400000	6590100000
protein_724	P62082	P62082	6	6	6	40S ribosomal protein S7	Rps7	sp|P62082|RS7_MOUSE 40S ribosomal protein S7 OS=Mus musculus OX=10090 GN=Rps7 PE=2 SV=1	1	6	6	6	3	5	5	3	3	5	5	3	3	5	5	3	30.9	30.9	30.9	22.127	194	194	3.4			12	8	0	87.981	14.9	30.4	19.6	14.9	619270000	99613000	314050000	162260000	43359000	270840000	289090000	230760000
protein_727	P62192	P62192	5	5	5	26S protease regulatory subunit 4	Psmc1	sp|P62192|PRS4_MOUSE 26S proteasome regulatory subunit 4 OS=Mus musculus OX=10090 GN=Psmc1 PE=1 SV=1	1	5	5	5	0	0	2	5	0	0	2	5	0	0	2	5	15.2	15.2	15.2	49.184	440	440	2		7			0	30.465	0	0	4.8	15.2	166750000	0	0	47181000	119570000	0	0	39783000
protein_728	P62196	P62196	7	7	7	26S protease regulatory subunit 8	Psmc5	sp|P62196|PRS8_MOUSE 26S proteasome regulatory subunit 8 OS=Mus musculus OX=10090 GN=Psmc5 PE=1 SV=1	1	7	7	7	1	0	4	6	1	0	4	6	1	0	4	6	20.4	20.4	20.4	45.626	406	406	2.08		12	1		0	46.591	3	0	9.9	18.2	248030000	18119000	0	101520000	128390000	0	0	40021000
protein_729	P62242	P62242	7	7	7	40S ribosomal protein S8	Rps8	sp|P62242|RS8_MOUSE 40S ribosomal protein S8 OS=Mus musculus OX=10090 GN=Rps8 PE=1 SV=2	1	7	7	7	6	6	3	4	6	6	3	4	6	6	3	4	38	38	38	24.205	208	208	2.96		2	22	1	0	60.941	34.6	34.6	17.8	21.2	879880000	274100000	365770000	118740000	121270000	285330000	258140000	139350000
protein_730	P62245	P62245	4	4	4	40S ribosomal protein S15a	Rps15a	sp|P62245|RS15A_MOUSE 40S ribosomal protein S15a OS=Mus musculus OX=10090 GN=Rps15a PE=1 SV=2	1	4	4	4	3	4	2	2	3	4	2	2	3	4	2	2	30.8	30.8	30.8	14.839	130	130	4				13	0	41.848	23.8	30.8	17.7	13.1	632560000	154970000	379800000	42034000	55760000	141720000	210550000	154100000
protein_732	P62259	P62259	23	23	21	14-3-3 protein epsilon	Ywhae	sp|P62259|1433E_MOUSE 14-3-3 protein epsilon OS=Mus musculus OX=10090 GN=Ywhae PE=1 SV=1	1	23	23	21	20	19	20	18	20	19	20	18	18	17	18	16	67.8	67.8	63.9	29.174	255	255	3.02	4	9	163	21	0	323.31	63.5	63.1	65.5	58	63296000000	15552000000	19586000000	18900000000	9258200000	13219000000	15153000000	13389000000
protein_734	P62267	P62267	3	3	3	40S ribosomal protein S23	Rps23	sp|P62267|RS23_MOUSE 40S ribosomal protein S23 OS=Mus musculus OX=10090 GN=Rps23 PE=1 SV=3	1	3	3	3	3	3	3	3	3	3	3	3	3	3	3	3	16.1	16.1	16.1	15.807	143	143	4				13	0	31.572	16.1	16.1	16.1	16.1	471950000	154090000	219930000	46614000	51313000	194190000	306520000	299260000
protein_735	P62270	P62270	9	9	9	40S ribosomal protein S18	Rps18	sp|P62270|RS18_MOUSE 40S ribosomal protein S18 OS=Mus musculus OX=10090 GN=Rps18 PE=1 SV=3	1	9	9	9	8	8	4	4	8	8	4	4	8	8	4	4	44.1	44.1	44.1	17.718	152	152	4				26	0	56.937	43.4	44.1	25.7	27.6	862740000	230410000	527210000	49313000	55812000	167700000	196000000	115640000
protein_747	P62484	P62484	7	7	5	Abl interactor 2	Abi2	sp|P62484|ABI2_MOUSE Abl interactor 2 OS=Mus musculus OX=10090 GN=Abi2 PE=1 SV=1	1	7	7	5	1	0	3	7	1	0	3	7	0	0	2	5	17.3	17.3	11.7	49.387	446	446	2	1	10	1		0	43.499	2	0	6.5	17.3	303600000	8327100	0	100280000	194990000	0	0	72100000
protein_750	P62702	P62702	13	13	13	40S ribosomal protein S4, X isoform	Rps4x	sp|P62702|RS4X_MOUSE 40S ribosomal protein S4, X isoform OS=Mus musculus OX=10090 GN=Rps4x PE=1 SV=2	1	13	13	13	7	10	10	6	7	10	10	6	7	10	10	6	42.6	42.6	42.6	29.597	263	263	3.07		2	34	5	0	196.08	27	39.9	30.8	22.8	1503300000	311310000	529970000	494790000	167260000	294080000	304710000	220540000
protein_754	P62743	P62743	5	5	5	AP-2 complex subunit sigma	Ap2s1	sp|P62743|AP2S1_MOUSE AP-2 complex subunit sigma OS=Mus musculus OX=10090 GN=Ap2s1 PE=1 SV=1	1	5	5	5	4	5	4	4	4	5	4	4	4	5	4	4	35.9	35.9	35.9	17.018	142	142	3.93			2	27	0	323.31	29.6	35.9	29.6	29.6	2425000000	261610000	1416500000	380130000	366800000	446370000	883510000	858280000
protein_757	P62751	P62751	2	2	2	60S ribosomal protein L23a	Rpl23a	sp|P62751|RL23A_MOUSE 60S ribosomal protein L23a OS=Mus musculus OX=10090 GN=Rpl23a PE=1 SV=1	1	2	2	2	2	2	1	0	2	2	1	0	2	2	1	0	13.5	13.5	13.5	17.695	156	156	3.43			4	3	0.0011179	13.485	13.5	13.5	8.3	0	327340000	113940000	186740000	26658000	0	314930000	176050000	0
protein_759	P62761	P62761	12	12	9	Visinin-like protein 1	Vsnl1	sp|P62761|VISL1_MOUSE Visinin-like protein 1 OS=Mus musculus OX=10090 GN=Vsnl1 PE=1 SV=2	1	12	12	9	10	12	9	8	10	12	9	8	7	9	7	6	59.7	59.7	48.2	22.142	191	191	3.72			19	48	0	323.31	49.2	59.7	49.7	40.8	7507600000	1301200000	3649000000	1824200000	733250000	1369400000	1766800000	1762500000
protein_761	P62806	P62806	11	11	11	Histone H4	Hist1h4a	sp|P62806|H4_MOUSE Histone H4 OS=Mus musculus OX=10090 GN=H4c1 PE=1 SV=2	1	11	11	11	7	11	7	6	7	11	7	6	7	11	7	6	60.2	60.2	60.2	11.367	103	103	3.45	7	4	6	47	0	323.31	49.5	60.2	42.7	42.7	23712000000	8437900000	11114000000	1347900000	2812600000	7347300000	5121000000	2037700000
protein_762	P62812;P26049;P26048;Q8BHJ7	P62812	6;2;2;1	6;2;2;1	6;2;2;1	Gamma-aminobutyric acid receptor subunit alpha-1	Gabra1	sp|P62812|GBRA1_MOUSE Gamma-aminobutyric acid receptor subunit alpha-1 OS=Mus musculus OX=10090 GN=Gabra1 PE=1 SV=1	4	6	6	6	0	0	4	4	0	0	4	4	0	0	4	4	14.7	14.7	14.7	51.753	455	455;492;451;463	2		8			0	36.503	0	0	9.5	8.8	133820000	0	0	65638000	68180000	0	0	28657000
protein_763	P62814;Q91YH6	P62814	20;5	20;5	20;5	V-type proton ATPase subunit B, brain isoform	Atp6v1b2	sp|P62814|VATB2_MOUSE V-type proton ATPase subunit B, brain isoform OS=Mus musculus OX=10090 GN=Atp6v1b2 PE=1 SV=1	2	20	20	20	13	14	14	19	13	14	14	19	13	14	14	19	47.2	47.2	47.2	56.55	511	511;513	2.4	7	71	30	13	0	323.31	28.4	34.4	31.1	45.6	9579800000	1523700000	655500000	3649200000	3751300000	768380000	824840000	975990000
protein_766	P62827;Q61820	P62827	9;2	9;2	9;2	GTP-binding nuclear protein Ran	Ran	sp|P62827|RAN_MOUSE GTP-binding nuclear protein Ran OS=Mus musculus OX=10090 GN=Ran PE=1 SV=3	2	9	9	9	5	8	7	7	5	8	7	7	5	8	7	7	38.9	38.9	38.9	24.423	216	216;216	2.88	5	1	29	6	0	110.06	28.2	35.6	38	35.2	3186400000	527780000	1245700000	819530000	593400000	472010000	612050000	489420000
protein_769	P62852	P62852	4	4	4	40S ribosomal protein S25	Rps25	sp|P62852|RS25_MOUSE 40S ribosomal protein S25 OS=Mus musculus OX=10090 GN=Rps25 PE=1 SV=1	1	4	4	4	2	4	3	3	2	4	3	3	2	4	3	3	24	24	24	13.742	125	125	4				12	0	28.964	14.4	24	22.4	22.4	461830000	89033000	272030000	42029000	58736000	221840000	180960000	93393000
protein_770	P62855	P62855	2	2	2	40S ribosomal protein S26	Rps26	sp|P62855|RS26_MOUSE 40S ribosomal protein S26 OS=Mus musculus OX=10090 GN=Rps26 PE=1 SV=3	1	2	2	2	2	2	1	1	2	2	1	1	2	2	1	1	20.9	20.9	20.9	13.015	115	115	3.25	2			6	0.001084	12.844	20.9	20.9	13	7.8	387580000	101360000	231210000	25336000	29677000	184450000	233390000	0
protein_773	P62869	P62869	8	8	8	Transcription elongation factor B polypeptide 2	Tceb2	sp|P62869|ELOB_MOUSE Elongin-B OS=Mus musculus OX=10090 GN=Elob PE=1 SV=1	1	8	8	8	3	8	3	3	3	8	3	3	3	8	3	3	55.9	55.9	55.9	13.17	118	118	4				17	0	55.435	24.6	55.9	25.4	22	446980000	62939000	283970000	57671000	42393000	89995000	144900000	119870000
protein_774	P62874	P62874	7	7	3	Guanine nucleotide-binding protein G(I)/G(S)/G(T) subunit beta-1	Gnb1	sp|P62874|GBB1_MOUSE Guanine nucleotide-binding protein G(I)/G(S)/G(T) subunit beta-1 OS=Mus musculus OX=10090 GN=Gnb1 PE=1 SV=3	1	7	7	3	6	6	6	7	6	6	6	7	2	2	2	3	19.1	19.1	7.6	37.377	340	340	2.63	12	12	33	11	0	323.31	15.6	15.6	15.6	19.1	18037000000	2579500000	5918700000	6638600000	2899900000	2237200000	5542800000	6812800000
protein_778	P62897;CON__P62894;P00015	P62897	8;3;2	8;3;2	8;3;2	Cytochrome c, somatic	Cycs	sp|P62897|CYC_MOUSE Cytochrome c, somatic OS=Mus musculus OX=10090 GN=Cycs PE=1 SV=2	3	8	8	8	7	8	6	6	7	8	6	6	7	8	6	6	57.1	57.1	57.1	11.605	105	105;105;105	3.23	6	8	7	32	0	122.07	56.2	57.1	40	55.2	5460300000	1496800000	2407800000	861460000	694260000	2334000000	1547300000	1003200000
protein_779	P62900	P62900	3	3	3	60S ribosomal protein L31	Rpl31	sp|P62900|RL31_MOUSE 60S ribosomal protein L31 OS=Mus musculus OX=10090 GN=Rpl31 PE=1 SV=1	1	3	3	3	2	2	2	3	2	2	2	3	2	2	2	3	26.4	26.4	26.4	14.463	125	125	4				10	0	103.77	18.4	18.4	18.4	26.4	450720000	110020000	224080000	47170000	69439000	205440000	224960000	150670000
protein_780	P62908	P62908	9	9	9	40S ribosomal protein S3	Rps3	sp|P62908|RS3_MOUSE 40S ribosomal protein S3 OS=Mus musculus OX=10090 GN=Rps3 PE=1 SV=1	1	9	9	9	5	8	7	7	5	8	7	7	5	8	7	7	34.2	34.2	34.2	26.674	243	243	3.12			28	4	0	80.304	19.3	30.9	30	25.5	1606400000	269410000	625410000	436760000	274850000	267580000	362880000	309820000
protein_781	P62918	P62918	5	5	5	60S ribosomal protein L8	Rpl8	sp|P62918|RL8_MOUSE 60S ribosomal protein L8 OS=Mus musculus OX=10090 GN=Rpl8 PE=1 SV=2	1	5	5	5	2	4	2	1	2	4	2	1	2	4	2	1	16.7	16.7	16.7	28.024	257	257	2.62	3	2	9	2	0	80.779	10.9	13.6	7.4	4.3	391020000	69719000	231370000	67926000	22002000	215990000	198840000	0
protein_784	P63001;Q05144	P63001;Q05144	7;5	7;5	3;1	Ras-related C3 botulinum toxin substrate 1;Ras-related C3 botulinum toxin substrate 2	Rac1;Rac2	sp|P63001|RAC1_MOUSE Ras-related C3 botulinum toxin substrate 1 OS=Mus musculus OX=10090 GN=Rac1 PE=1 SV=1;sp|Q05144|RAC2_MOUSE Ras-related C3 botulinum toxin substrate 2 OS=Mus musculus OX=10090 GN=Rac2 PE=1 SV=1	2	7	7	3	5	7	2	5	5	7	2	5	3	3	1	3	38	38	14.1	21.45	192	192;192	3.33	2	1	21	19	0	323.31	27.1	38	10.4	27.1	4296600000	1066700000	1909700000	753770000	566490000	1113500000	1246200000	1603600000
protein_785	P63005	P63005	5	5	5	Platelet-activating factor acetylhydrolase IB subunit alpha	Pafah1b1	sp|P63005|LIS1_MOUSE Platelet-activating factor acetylhydrolase IB subunit beta OS=Mus musculus OX=10090 GN=Pafah1b1 PE=1 SV=2	1	5	5	5	0	0	4	5	0	0	4	5	0	0	4	5	16.1	16.1	16.1	46.67	410	410	2		10			0	37.174	0	0	12.4	16.1	312160000	0	0	141420000	170730000	0	0	79401000
protein_786	P63011	P63011	7	7	5	Ras-related protein Rab-3A	Rab3a	sp|P63011|RAB3A_MOUSE Ras-related protein Rab-3A OS=Mus musculus OX=10090 GN=Rab3a PE=1 SV=1	1	7	7	5	5	7	6	5	5	7	6	5	3	5	4	3	42.7	42.7	30.5	24.97	220	220	2.89	7	1	38	9	0	225.61	33.6	42.7	39.1	31.8	13093000000	1173800000	6226900000	4007900000	1684200000	1443600000	2680400000	2096100000
protein_787	P63017	P63017	30	30	22	Heat shock cognate 71 kDa protein	Hspa8	sp|P63017|HSP7C_MOUSE Heat shock cognate 71 kDa protein OS=Mus musculus OX=10090 GN=Hspa8 PE=1 SV=1	1	30	30	22	19	25	26	27	19	25	26	27	11	17	18	19	47.5	47.5	35.4	70.87	646	646	2.14	60	133	64	17	0	323.31	31.9	41.3	42.1	43.2	41602000000	5444300000	5770300000	14415000000	15972000000	1931000000	1642200000	1719600000
protein_791	P63038	P63038	21	21	21	60 kDa heat shock protein, mitochondrial	Hspd1	sp|P63038|CH60_MOUSE 60 kDa heat shock protein, mitochondrial OS=Mus musculus OX=10090 GN=Hspd1 PE=1 SV=1	1	21	21	21	11	8	17	17	11	8	17	17	11	8	17	17	41.7	41.7	41.7	60.955	573	573	2.23	5	57	20	2	0	322.53	20.2	16.4	30.4	37	6114000000	610580000	254320000	2446800000	2802300000	371790000	363100000	492280000
protein_793	P63044;P63024	P63044;P63024	6;3	6;3	5;2	Vesicle-associated membrane protein 2;Vesicle-associated membrane protein 3	Vamp2;Vamp3	sp|P63044|VAMP2_MOUSE Vesicle-associated membrane protein 2 OS=Mus musculus OX=10090 GN=Vamp2 PE=1 SV=2;sp|P63024|VAMP3_MOUSE Vesicle-associated membrane protein 3 OS=Mus musculus OX=10090 GN=Vamp3 PE=1 SV=1	2	6	6	5	2	6	5	3	2	6	5	3	2	5	4	3	60.3	60.3	60.3	12.691	116	116;103	3.97			1	28	0	323.31	28.4	60.3	35.3	34.5	18559000000	3857900000	10257000000	2136500000	2307200000	5683900000	4908700000	3417000000
protein_798	P63085	P63085	13	13	10	Mitogen-activated protein kinase 1	Mapk1	sp|P63085|MK01_MOUSE Mitogen-activated protein kinase 1 OS=Mus musculus OX=10090 GN=Mapk1 PE=1 SV=3	1	13	13	10	6	6	12	11	6	6	12	11	6	6	10	8	34.9	34.9	25.4	41.275	358	358	2.69		30	33	8	0	241.81	20.7	20.7	30.7	30.2	1977600000	196620000	140950000	975020000	665030000	221520000	92442000	219700000
protein_800	P63101	P63101	16	14	12	14-3-3 protein zeta/delta	Ywhaz	sp|P63101|1433Z_MOUSE 14-3-3 protein zeta/delta OS=Mus musculus OX=10090 GN=Ywhaz PE=1 SV=1	1	16	14	12	15	15	15	14	13	13	13	12	12	12	12	11	65.7	61.6	52.2	27.771	245	245	2.99	6	7	90	18	0	323.31	62	63.3	62	57.1	94274000000	17253000000	30505000000	34007000000	12510000000	12708000000	15284000000	15448000000
protein_801	P63158;P30681	P63158	5;1	5;1	5;1	High mobility group protein B1	Hmgb1	sp|P63158|HMGB1_MOUSE High mobility group protein B1 OS=Mus musculus OX=10090 GN=Hmgb1 PE=1 SV=2	2	5	5	5	2	4	4	5	2	4	4	5	2	4	4	5	17.7	17.7	17.7	24.893	215	215;210	3			19		0	40.114	7	13.5	17.2	17.7	656790000	54501000	222060000	228710000	151510000	259320000	267480000	137170000
protein_803	P63213	P63213	2	2	2	Guanine nucleotide-binding protein G(I)/G(S)/G(O) subunit gamma-2	Gng2	sp|P63213|GBG2_MOUSE Guanine nucleotide-binding protein G(I)/G(S)/G(O) subunit gamma-2 OS=Mus musculus OX=10090 GN=Gng2 PE=1 SV=2	1	2	2	2	2	2	1	2	2	2	1	2	2	2	1	2	39.4	39.4	39.4	7.8501	71	71	4				9	0	41.087	39.4	39.4	16.9	39.4	674890000	338510000	227480000	29482000	79419000	875610000	190180000	0
protein_808	P63318	P63318	18	18	17	Protein kinase C gamma type	Prkcg	sp|P63318|KPCG_MOUSE Protein kinase C gamma type OS=Mus musculus OX=10090 GN=Prkcg PE=1 SV=1	1	18	18	17	3	12	9	12	3	12	9	12	3	12	9	11	25.3	25.3	23	78.357	697	697	1.7	21	20	5	1	0	122.47	5.5	16.4	12.9	17.9	1523400000	162830000	589640000	334780000	436110000	222910000	175820000	174660000
protein_809	P63321	P63321	7	7	3	Ras-related protein Ral-A	Rala	sp|P63321|RALA_MOUSE Ras-related protein Ral-A OS=Mus musculus OX=10090 GN=Rala PE=1 SV=1	1	7	7	3	3	7	4	3	3	7	4	3	2	3	2	1	38.3	38.3	15	23.553	206	206	3.05			19	1	0	53.364	19.4	38.3	22.8	16	1303300000	234650000	578270000	337600000	152760000	449840000	652850000	481860000
protein_811	P63325	P63325	3	3	3	40S ribosomal protein S10	Rps10	sp|P63325|RS10_MOUSE 40S ribosomal protein S10 OS=Mus musculus OX=10090 GN=Rps10 PE=1 SV=1	1	3	3	3	2	3	1	1	2	3	1	1	2	3	1	1	18.2	18.2	18.2	18.916	165	165	3.71			2	5	0.00072464	23.162	18.2	18.2	9.1	9.1	292940000	44578000	230070000	7314200	10976000	126980000	202460000	0
protein_812	P63328;P48455	P63328	15;3	15;3	8;0	Serine/threonine-protein phosphatase 2B catalytic subunit alpha isoform	Ppp3ca	sp|P63328|PP2BA_MOUSE Serine/threonine-protein phosphatase 2B catalytic subunit alpha isoform OS=Mus musculus OX=10090 GN=Ppp3ca PE=1 SV=1	2	15	15	8	9	12	13	13	9	12	13	13	4	7	6	6	32.4	32.4	16.9	58.643	521	521;513	2.4	14	43	32	11	0	156.66	18	23.8	29.9	29.9	11674000000	2013500000	1758000000	3630600000	4271600000	950780000	876780000	771950000
protein_813	P67778	P67778	14	14	14	Prohibitin	Phb	sp|P67778|PHB_MOUSE Prohibitin OS=Mus musculus OX=10090 GN=Phb PE=1 SV=1	1	14	14	14	11	12	11	9	11	12	11	9	11	12	11	9	60.3	60.3	60.3	29.82	272	272	3.04	1		46	4	0	205.56	47.4	46.7	45.2	41.2	4581700000	1018600000	1893900000	1058000000	611180000	573370000	654740000	526490000
protein_818	P68040	P68040	8	8	8	Guanine nucleotide-binding protein subunit beta-2-like 1;Guanine nucleotide-binding protein subunit beta-2-like 1, N-terminally processed	Gnb2l1	sp|P68040|RACK1_MOUSE Receptor of activated protein C kinase 1 OS=Mus musculus OX=10090 GN=Rack1 PE=1 SV=3	1	8	8	8	3	8	5	4	3	8	5	4	3	8	5	4	25.6	25.6	25.6	35.076	317	317	3.08			23	2	0	63.204	12.3	25.6	18.3	15.5	1387700000	200900000	614040000	351050000	221750000	291260000	446240000	286690000
protein_819	P68181	P68181	7	7	2	cAMP-dependent protein kinase catalytic subunit beta	Prkacb	sp|P68181|KAPCB_MOUSE cAMP-dependent protein kinase catalytic subunit beta OS=Mus musculus OX=10090 GN=Prkacb PE=1 SV=2	1	7	7	2	3	2	4	6	3	2	4	6	1	1	1	2	21.9	21.9	10.3	40.707	351	351	2.3		15	4	1	0	46.231	8.5	6	11.1	19.4	825660000	49488000	18745000	377580000	379850000	88923000	139340000	164600000
protein_820	P68254	P68254	9	6	6	14-3-3 protein theta	Ywhaq	sp|P68254|1433T_MOUSE 14-3-3 protein theta OS=Mus musculus OX=10090 GN=Ywhaq PE=1 SV=1	1	9	6	6	7	8	6	7	5	5	4	5	5	5	4	5	37.6	26.5	26.5	27.778	245	245	3.16			26	5	0	184.99	33.5	37.6	33.9	33.9	6341800000	1368500000	2333800000	1666500000	972970000	2392600000	2125800000	1498500000
protein_821	P68368	P68368	22	4	4	Tubulin alpha-4A chain	Tuba4a	sp|P68368|TBA4A_MOUSE Tubulin alpha-4A chain OS=Mus musculus OX=10090 GN=Tuba4a PE=1 SV=1	1	22	4	4	19	19	19	21	3	3	3	4	3	3	3	4	58	12.1	12.1	49.924	448	448	2.4	11	17	13	9	0	169.58	44.4	48	48	57.8	24031000000	4355100000	3186500000	7299600000	9190200000	3887700000	5090300000	3275600000
protein_824	P68404	P68404	13	13	12	Protein kinase C beta type	Prkcb	sp|P68404|KPCB_MOUSE Protein kinase C beta type OS=Mus musculus OX=10090 GN=Prkcb PE=1 SV=4	1	13	13	12	2	11	6	10	2	11	6	10	2	10	5	9	17.9	17.9	16.1	76.75	671	671	1.71	22	16	5	2	0	86.783	2.5	15.9	8.3	14.9	984690000	29721000	479210000	133020000	342750000	20821000	106540000	52675000
protein_825	P68510	P68510	14	11	11	14-3-3 protein eta	Ywhah	sp|P68510|1433F_MOUSE 14-3-3 protein eta OS=Mus musculus OX=10090 GN=Ywhah PE=1 SV=2	1	14	11	11	11	13	12	11	8	11	9	8	8	11	9	8	50.4	43.9	43.9	28.211	246	246	2.98		2	49	1	0	323.31	35	48	39	35	10115000000	2219900000	4056600000	2420100000	1418200000	2432800000	2923600000	2433000000
protein_827	P70168	P70168	16	16	16	Importin subunit beta-1	Kpnb1	sp|P70168|IMB1_MOUSE Importin subunit beta-1 OS=Mus musculus OX=10090 GN=Kpnb1 PE=1 SV=2	1	16	16	16	3	14	5	12	3	14	5	12	3	14	5	12	22.7	22.7	22.7	97.183	876	876	1.18	33	3	2		0	168.26	4.1	19.6	7.6	16.3	1093600000	31614000	517810000	171980000	372180000	75535000	116310000	116530000
protein_838	P70296	P70296	9	9	9	Phosphatidylethanolamine-binding protein 1;Hippocampal cholinergic neurostimulating peptide	Pebp1	sp|P70296|PEBP1_MOUSE Phosphatidylethanolamine-binding protein 1 OS=Mus musculus OX=10090 GN=Pebp1 PE=1 SV=3	1	9	9	9	8	8	9	6	8	8	9	6	8	8	9	6	49.2	49.2	49.2	20.83	187	187	3.37			34	20	0	285.98	45.5	45.5	49.2	45.5	10948000000	2780000000	4744300000	2063500000	1360000000	1952500000	3238800000	1368200000
protein_840	P70336;P70335	P70336	18;2	18;2	18;2	Rho-associated protein kinase 2	Rock2	sp|P70336|ROCK2_MOUSE Rho-associated protein kinase 2 OS=Mus musculus OX=10090 GN=Rock2 PE=1 SV=1	2	18	18	18	2	14	2	12	2	14	2	12	2	14	2	12	13.7	13.7	13.7	160.58	1388	1388;1354	1.2	26	2	2		0	113.56	1.3	11	1.7	8.6	376280000	16972000	248170000	7878100	103270000	14498000	51582000	4766200
protein_843	P70372	P70372	8	8	8	ELAV-like protein 1	Elavl1	sp|P70372|ELAV1_MOUSE ELAV-like protein 1 OS=Mus musculus OX=10090 GN=Elavl1 PE=1 SV=2	1	8	8	8	2	7	4	2	2	7	4	2	2	7	4	2	24.2	24.2	24.2	36.169	326	326	3			15		0	55.46	6.7	20.9	14.1	6.7	367960000	41334000	150860000	115470000	60294000	81570000	132340000	98854000
protein_846	P70404	P70404	7	7	7	Isocitrate dehydrogenase [NAD] subunit gamma 1, mitochondrial	Idh3g	sp|P70404|IDHG1_MOUSE Isocitrate dehydrogenase [NAD] subunit gamma 1, mitochondrial OS=Mus musculus OX=10090 GN=Idh3g PE=1 SV=1	1	7	7	7	3	2	6	5	3	2	6	5	3	2	6	5	19.1	19.1	19.1	42.785	393	393	2.36		14	8		0	64.069	4.6	4.6	15.8	11.5	1096100000	92110000	22139000	734050000	247830000	284980000	200390000	165620000
protein_848	P70441	P70441	6	6	6	Na(+)/H(+) exchange regulatory cofactor NHE-RF1	Slc9a3r1	sp|P70441|NHRF1_MOUSE Na(+)/H(+) exchange regulatory cofactor NHE-RF1 OS=Mus musculus OX=10090 GN=Slc9a3r1 PE=1 SV=3	1	6	6	6	3	1	3	4	3	1	3	4	3	1	3	4	24.5	24.5	24.5	38.6	355	355	2.42		7	5		0	38.123	13.2	3.1	10.7	14.1	278310000	82685000	11304000	91895000	92428000	0	0	53746000
protein_852	P80313	P80313	8	8	8	T-complex protein 1 subunit eta	Cct7	sp|P80313|TCPH_MOUSE T-complex protein 1 subunit eta OS=Mus musculus OX=10090 GN=Cct7 PE=1 SV=1	1	8	8	8	2	1	4	6	2	1	4	6	2	1	4	6	17.1	17.1	17.1	59.652	544	544	2.13		13	2		0	89.319	3.1	3.1	8.6	12.7	278160000	9599200	7224700	96204000	165130000	0	0	46836000
protein_853	P80314	P80314	16	16	16	T-complex protein 1 subunit beta	Cct2	sp|P80314|TCPB_MOUSE T-complex protein 1 subunit beta OS=Mus musculus OX=10090 GN=Cct2 PE=1 SV=4	1	16	16	16	3	3	9	13	3	3	9	13	3	3	9	13	42.4	42.4	42.4	57.477	535	535	2.23		25	5	1	0	122.03	6	6	23.7	33.1	1239600000	63828000	27674000	543520000	604560000	123190000	42410000	168220000
protein_854	P80315	P80315	11	11	11	T-complex protein 1 subunit delta	Cct4	sp|P80315|TCPD_MOUSE T-complex protein 1 subunit delta OS=Mus musculus OX=10090 GN=Cct4 PE=1 SV=3	1	11	11	11	2	2	8	10	2	2	8	10	2	2	8	10	23	23	23	58.066	539	539	2.27		20	5	1	0	90.075	4.8	3.9	17.1	20.4	978400000	50048000	30788000	402130000	495440000	97548000	79129000	142570000
protein_855	P80316	P80316	11	11	11	T-complex protein 1 subunit epsilon	Cct5	sp|P80316|TCPE_MOUSE T-complex protein 1 subunit epsilon OS=Mus musculus OX=10090 GN=Cct5 PE=1 SV=1	1	11	11	11	0	0	7	9	0	0	7	9	0	0	7	9	23.5	23.5	23.5	59.623	541	541	2		16			0	96.212	0	0	14	18.5	472850000	0	0	305190000	167650000	0	0	97261000
protein_856	P80317;Q61390	P80317	12;4	12;4	12;4	T-complex protein 1 subunit zeta	Cct6a	sp|P80317|TCPZ_MOUSE T-complex protein 1 subunit zeta OS=Mus musculus OX=10090 GN=Cct6a PE=1 SV=3	2	12	12	12	1	1	10	9	1	1	10	9	1	1	10	9	28.1	28.1	28.1	58.004	531	531;531	2.09		21	2		0	99.194	1.7	1.7	21.7	19.6	696790000	13988000	16711000	356230000	309860000	0	0	100150000
protein_857	P80318	P80318	11	11	11	T-complex protein 1 subunit gamma	Cct3	sp|P80318|TCPG_MOUSE T-complex protein 1 subunit gamma OS=Mus musculus OX=10090 GN=Cct3 PE=1 SV=1	1	11	11	11	3	4	7	11	3	4	7	11	3	4	7	11	22.8	22.8	22.8	60.629	545	545	2.21		24	4	1	0	97.577	6.1	7.7	16.5	22.8	980490000	79549000	36154000	313540000	551240000	83015000	103730000	89934000
protein_860	P84075	P84075	10	10	3	Neuron-specific calcium-binding protein hippocalcin	Hpca	sp|P84075|HPCA_MOUSE Neuron-specific calcium-binding protein hippocalcin OS=Mus musculus OX=10090 GN=Hpca PE=1 SV=2	1	10	10	3	6	9	5	7	6	9	5	7	2	3	1	2	55.4	55.4	19.2	22.427	193	193	3.73			13	35	0	97.487	34.7	51.8	26.4	44	3363700000	740460000	1728100000	432470000	462730000	743510000	859560000	1142400000
protein_861	P84084	P84084	7	2	2	ADP-ribosylation factor 5	Arf5	sp|P84084|ARF5_MOUSE ADP-ribosylation factor 5 OS=Mus musculus OX=10090 GN=Arf5 PE=1 SV=2	1	7	2	2	7	7	6	6	2	2	1	1	2	2	1	1	44.4	10	10	20.529	180	180	3.71			2	5	0	36.16	44.4	44.4	40	40	311680000	98327000	73834000	120250000	19272000	215850000	145190000	0
protein_862	P84086	P84086	4	4	2	Complexin-2	Cplx2	sp|P84086|CPLX2_MOUSE Complexin-2 OS=Mus musculus OX=10090 GN=Cplx2 PE=1 SV=1	1	4	4	2	2	4	1	0	2	4	1	0	1	2	0	0	20.1	20.1	11.2	15.394	134	134	4				9	0	33.431	18.7	20.1	8.2	0	588670000	183430000	354830000	50403000	0	325160000	238720000	0
protein_864	P84091	P84091	14	14	14	AP-2 complex subunit mu	Ap2m1	sp|P84091|AP2M1_MOUSE AP-2 complex subunit mu OS=Mus musculus OX=10090 GN=Ap2m1 PE=1 SV=1	1	14	14	14	5	6	11	14	5	6	11	14	5	6	11	14	32.4	32.4	32.4	49.654	435	435	2.21	4	37	14	1	0	323.31	9.4	13.1	24.1	32.4	3333200000	303550000	186060000	1546700000	1297000000	243280000	239580000	347550000
protein_866	P84099	P84099	3	3	3	60S ribosomal protein L19	Rpl19	sp|P84099|RL19_MOUSE 60S ribosomal protein L19 OS=Mus musculus OX=10090 GN=Rpl19 PE=1 SV=1	1	3	3	3	2	3	1	1	2	3	1	1	2	3	1	1	16.8	16.8	16.8	23.466	196	196	3			7		0.0014114	21.46	13.3	16.8	4.6	4.6	155720000	38587000	65773000	43212000	8148400	85395000	74822000	0
protein_869	P97300	P97300	8	8	8	Neuroplastin	Nptn	sp|P97300|NPTN_MOUSE Neuroplastin OS=Mus musculus OX=10090 GN=Nptn PE=1 SV=3	1	8	8	8	5	3	7	7	5	3	7	7	5	3	7	7	21.9	21.9	21.9	44.373	397	397	2.15	4	24	3	3	0	110	14.9	7.8	17.4	21.7	2508100000	398780000	154900000	913270000	1041100000	676270000	562850000	576310000
protein_870	P97315	P97315	3	3	3	Cysteine and glycine-rich protein 1	Csrp1	sp|P97315|CSRP1_MOUSE Cysteine and glycine-rich protein 1 OS=Mus musculus OX=10090 GN=Csrp1 PE=1 SV=3	1	3	3	3	2	3	1	1	2	3	1	1	2	3	1	1	24.4	24.4	24.4	20.583	193	193	3.3			7	3	0	34.381	19.2	24.4	7.8	7.8	1026800000	265210000	638550000	79982000	43027000	608750000	865070000	0
protein_872	P97351	P97351	9	9	9	40S ribosomal protein S3a	Rps3a	sp|P97351|RS3A_MOUSE 40S ribosomal protein S3a OS=Mus musculus OX=10090 GN=Rps3a PE=1 SV=3	1	9	9	9	3	9	4	3	3	9	4	3	3	9	4	3	34.8	34.8	34.8	29.885	264	264	3			20		0	94.311	11.4	34.8	14.4	9.5	605270000	126280000	301670000	131530000	45793000	155350000	260090000	147820000
protein_877	P97390	P97390	9	9	9	Vacuolar protein sorting-associated protein 45	Vps45	sp|P97390|VPS45_MOUSE Vacuolar protein sorting-associated protein 45 OS=Mus musculus OX=10090 GN=Vps45 PE=1 SV=1	1	9	9	9	0	0	6	6	0	0	6	6	0	0	6	6	17.9	17.9	17.9	65.052	570	570	2		12			0	54.932	0	0	11.6	11.8	148880000	0	0	68329000	80547000	0	0	27297000
protein_878	P97427	P97427	19	16	14	Dihydropyrimidinase-related protein 1	Crmp1	sp|P97427|DPYL1_MOUSE Dihydropyrimidinase-related protein 1 OS=Mus musculus OX=10090 GN=Crmp1 PE=1 SV=1	1	19	16	14	9	11	15	17	8	8	13	15	6	6	12	13	41.4	35	30.9	62.167	572	572	2.21	11	36	17	4	0	323.31	20.3	24.5	30.1	38.5	4524100000	669460000	361860000	1613000000	1879700000	443650000	201470000	385260000
protein_879	P97441	P97441	5	5	5	Zinc transporter 3	Slc30a3	sp|P97441|ZNT3_MOUSE Zinc transporter 3 OS=Mus musculus OX=10090 GN=Slc30a3 PE=1 SV=1	1	5	5	5	2	3	5	4	2	3	5	4	2	3	5	4	11.6	11.6	11.6	41.824	388	388	2.53	3	4	11	1	0	42.724	4.6	8.5	11.6	7.7	403520000	45711000	26764000	231780000	99268000	168450000	105580000	347350000
protein_884	P97765	P97765	4	4	4	WW domain-binding protein 2	Wbp2	sp|P97765|WBP2_MOUSE WW domain-binding protein 2 OS=Mus musculus OX=10090 GN=Wbp2 PE=1 SV=1	1	4	4	4	2	4	2	2	2	4	2	2	2	4	2	2	13	13	13	28.032	261	261	3			11		0	37.557	3.8	13	7.7	3.8	257060000	21660000	88341000	111060000	36002000	54623000	75293000	135010000
protein_886	P97797	P97797	10	10	10	Tyrosine-protein phosphatase non-receptor type substrate 1	Sirpa	sp|P97797|SHPS1_MOUSE Tyrosine-protein phosphatase non-receptor type substrate 1 OS=Mus musculus OX=10090 GN=Sirpa PE=1 SV=2	1	10	10	10	2	10	5	7	2	10	5	7	2	10	5	7	22.4	22.4	22.4	56.413	513	513	1.16	28	1	2		0	91.583	5.8	22.4	14.8	19.3	2427200000	138790000	1194400000	333850000	760170000	261880000	371540000	253380000
protein_888	P97807	P97807	14	14	14	Fumarate hydratase, mitochondrial	Fh	sp|P97807|FUMH_MOUSE Fumarate hydratase, mitochondrial OS=Mus musculus OX=10090 GN=Fh PE=1 SV=3	1	14	14	14	5	3	9	13	5	3	9	13	5	3	9	13	34.9	34.9	34.9	54.356	507	507	2.26		31	6	2	0	162.32	13.2	7.9	19.5	33.9	2261300000	178480000	50257000	798290000	1234300000	204180000	162290000	161930000
protein_893	P99024	P99024	25	6	5	Tubulin beta-5 chain	Tubb5	sp|P99024|TBB5_MOUSE Tubulin beta-5 chain OS=Mus musculus OX=10090 GN=Tubb5 PE=1 SV=1	1	25	6	5	19	20	20	24	5	5	5	6	4	4	4	5	57.2	19.6	16.2	49.67	444	444	2.38	16	39	21	15	0	323.31	52.3	52.3	51.4	56.3	36056000000	4690000000	3440400000	12931000000	14995000000	4679500000	5871300000	4461400000
protein_896	P99029	P99029	11	11	11	Peroxiredoxin-5, mitochondrial	Prdx5	sp|P99029|PRDX5_MOUSE Peroxiredoxin-5, mitochondrial OS=Mus musculus OX=10090 GN=Prdx5 PE=1 SV=2	1	11	11	11	9	11	7	9	9	11	7	9	9	11	7	9	46.2	46.2	46.2	21.897	210	210	3.98			1	45	0	204.92	38.1	46.2	37.6	38.1	9330900000	2107800000	5265500000	658840000	1298900000	1969500000	2100900000	1154000000
protein_900	Q00623	Q00623	7	7	7	Apolipoprotein A-I;Proapolipoprotein A-I;Truncated apolipoprotein A-I	Apoa1	sp|Q00623|APOA1_MOUSE Apolipoprotein A-I OS=Mus musculus OX=10090 GN=Apoa1 PE=1 SV=2	1	7	7	7	4	5	1	2	4	5	1	2	4	5	1	2	24.2	24.2	24.2	30.615	264	264	3			13		0	52.848	15.9	15.9	3.4	8.3	567060000	382190000	126290000	14632000	43942000	741850000	89869000	0
protein_904	Q01065	Q01065	6	5	5	Calcium/calmodulin-dependent 3,5-cyclic nucleotide phosphodiesterase 1B	Pde1b	sp|Q01065|PDE1B_MOUSE Calcium/calmodulin-dependent 3,5-cyclic nucleotide phosphodiesterase 1B OS=Mus musculus OX=10090 GN=Pde1b PE=1 SV=2	1	6	5	5	1	0	4	6	0	0	3	5	0	0	3	5	12	9.3	9.3	61.225	535	535	2		8			0	32.258	2.6	0	8.8	12	130030000	0	0	54162000	75864000	0	0	43525000
protein_908	Q01768	Q01768	6	2	2	Nucleoside diphosphate kinase B	Nme2	sp|Q01768|NDKB_MOUSE Nucleoside diphosphate kinase B OS=Mus musculus OX=10090 GN=Nme2 PE=1 SV=1	1	6	2	2	5	6	5	5	2	2	1	1	2	2	1	1	40.8	15.8	15.8	17.363	152	152	4				9	0	52.353	29.6	40.8	34.2	34.2	1323500000	403730000	500450000	367630000	51657000	752730000	482640000	0
protein_909	Q01853	Q01853	28	28	28	Transitional endoplasmic reticulum ATPase	Vcp	sp|Q01853|TERA_MOUSE Transitional endoplasmic reticulum ATPase OS=Mus musculus OX=10090 GN=Vcp PE=1 SV=4	1	28	28	28	8	23	14	19	8	23	14	19	8	23	14	19	36.8	36.8	36.8	89.321	806	806	1.57	60	23	10	4	0	263.01	9.8	34.4	21.5	26.2	4373800000	172570000	2246300000	793380000	1161500000	187460000	227180000	185500000
protein_910	Q02053;P31254	Q02053	24;5	24;5	24;5	Ubiquitin-like modifier-activating enzyme 1	Uba1	sp|Q02053|UBA1_MOUSE Ubiquitin-like modifier-activating enzyme 1 OS=Mus musculus OX=10090 GN=Uba1 PE=1 SV=1	2	24	24	24	5	23	12	15	5	23	12	15	5	23	12	15	30.2	30.2	30.2	117.81	1058	1058;1058	1.58	56	29	9	3	0	195.57	5.4	28	14.6	20.2	5021300000	149080000	2160700000	886440000	1825100000	108450000	289180000	210410000
protein_912	Q02248	Q02248	14	12	12	Catenin beta-1	Ctnnb1	sp|Q02248|CTNB1_MOUSE Catenin beta-1 OS=Mus musculus OX=10090 GN=Ctnnb1 PE=1 SV=1	1	14	12	12	4	12	5	7	3	10	4	7	3	10	4	7	20.6	18.7	18.7	85.47	781	781	1.3	23	5	2		0	81.587	6.1	17.9	6	10.8	735600000	29480000	372970000	68890000	264270000	65856000	101360000	75817000
protein_913	Q02257	Q02257	14	14	12	Junction plakoglobin	Jup	sp|Q02257|PLAK_MOUSE Junction plakoglobin OS=Mus musculus OX=10090 GN=Jup PE=1 SV=3	1	14	14	12	2	13	4	4	2	13	4	4	1	11	3	4	22	22	20	81.8	745	745	1.73	18	5	4	3	0	135.28	3.1	20.8	5.2	7	734950000	37544000	603610000	30464000	63334000	50061000	157810000	15431000
protein_918	Q03265	Q03265	28	28	28	ATP synthase subunit alpha, mitochondrial	Atp5a1	sp|Q03265|ATPA_MOUSE ATP synthase subunit alpha, mitochondrial OS=Mus musculus OX=10090 GN=Atp5f1a PE=1 SV=1	1	28	28	28	22	24	26	27	22	24	26	27	22	24	26	27	57	57	57	59.752	553	553	2.39	35	135	73	35	0	323.31	47.2	49.9	53.5	56.8	71404000000	9937500000	5950400000	24797000000	30719000000	3056700000	3921300000	3178200000
protein_919	Q04447;P07310	Q04447	17;1	17;1	17;1	Creatine kinase B-type	Ckb	sp|Q04447|KCRB_MOUSE Creatine kinase B-type OS=Mus musculus OX=10090 GN=Ckb PE=1 SV=1	2	17	17	17	16	13	15	16	16	13	15	16	16	13	15	16	60.6	60.6	60.6	42.713	381	381;381	2.5	16	107	71	28	0	323.31	54.1	43.8	54.1	57.7	71270000000	10039000000	6747200000	22641000000	31843000000	5466700000	5710900000	4280600000
protein_926	Q05816	Q05816	3	3	3	Fatty acid-binding protein, epidermal	Fabp5	sp|Q05816|FABP5_MOUSE Fatty acid-binding protein 5 OS=Mus musculus OX=10090 GN=Fabp5 PE=1 SV=3	1	3	3	3	2	3	0	1	2	3	0	1	2	3	0	1	22.2	22.2	22.2	15.137	135	135	3.45	2			9	0	44.028	15.6	22.2	0	6.7	563510000	145600000	363020000	0	54885000	344320000	339920000	0
protein_927	Q05920	Q05920	18	18	18	Pyruvate carboxylase, mitochondrial	Pc	sp|Q05920|PYC_MOUSE Pyruvate carboxylase, mitochondrial OS=Mus musculus OX=10090 GN=Pc PE=1 SV=1	1	18	18	18	2	13	3	15	2	13	3	15	2	13	3	15	18	18	18	129.68	1178	1178	1.22	31	3	1	1	0	130.12	1.6	13	2.9	14.9	860140000	21056000	428330000	38071000	372690000	21207000	136130000	26945000
protein_929	Q06185	Q06185	4	4	4	ATP synthase subunit e, mitochondrial	Atp5i	sp|Q06185|ATP5I_MOUSE ATP synthase subunit e, mitochondrial OS=Mus musculus OX=10090 GN=Atp5me PE=1 SV=2	1	4	4	4	3	4	3	2	3	4	3	2	3	4	3	2	60.6	60.6	60.6	8.2355	71	71	3.86	1			20	0	158.02	50.7	60.6	42.3	32.4	3165000000	796100000	1483600000	516800000	368520000	2036500000	1438800000	1297100000
protein_931	Q07076	Q07076	6	6	6	Annexin A7	Anxa7	sp|Q07076|ANXA7_MOUSE Annexin A7 OS=Mus musculus OX=10090 GN=Anxa7 PE=1 SV=2	1	6	6	6	5	2	5	4	5	2	5	4	5	2	5	4	13.6	13.6	13.6	49.925	463	463	2.35		14	5	1	0	45.035	11.2	5.2	11.9	9.9	451180000	72313000	7732100	187100000	184030000	74486000	69239000	65831000
protein_937	Q11011	Q11011	25	25	25	Puromycin-sensitive aminopeptidase	Npepps	sp|Q11011|PSA_MOUSE Puromycin-sensitive aminopeptidase OS=Mus musculus OX=10090 GN=Npepps PE=1 SV=2	1	25	25	25	11	22	12	21	11	22	12	21	11	22	12	21	28.8	28.8	28.8	103.32	920	920	1.65	55	14	16	4	0	175.02	12.8	25.4	13.5	23.5	2597700000	314980000	1037300000	348480000	896980000	156700000	122750000	104540000
protein_938	Q11136	Q11136	2	2	2	Xaa-Pro dipeptidase	Pepd	sp|Q11136|PEPD_MOUSE Xaa-Pro dipeptidase OS=Mus musculus OX=10090 GN=Pepd PE=1 SV=3	1	2	2	2	0	1	2	2	0	1	2	2	0	1	2	2	3.7	3.7	3.7	55.028	493	493	2		5			0.00099651	11.77	0	1.6	3.7	3.7	44098000	0	1724700	17846000	24527000	0	0	15143000
protein_943	Q2M3X8;Q501J7	Q2M3X8	9;2	9;2	9;2	Phosphatase and actin regulator 1	Phactr1	sp|Q2M3X8|PHAR1_MOUSE Phosphatase and actin regulator 1 OS=Mus musculus OX=10090 GN=Phactr1 PE=1 SV=1	2	9	9	9	3	7	3	6	3	7	3	6	3	7	3	6	16.2	16.2	16.2	66.285	580	580;694	1.67	10	8	3		0	57.588	6.4	13.4	7.6	10.9	209530000	39411000	95589000	20723000	53805000	47084000	26504000	20201000
protein_944	Q2NL51	Q2NL51	5	5	4	Glycogen synthase kinase-3 alpha	Gsk3a	sp|Q2NL51|GSK3A_MOUSE Glycogen synthase kinase-3 alpha OS=Mus musculus OX=10090 GN=Gsk3a PE=1 SV=2	1	5	5	4	1	0	3	5	1	0	3	5	1	0	2	4	12	12	10.2	51.66	490	490	2.11		8	1		0	32.495	2.9	0	6.7	12	238370000	14791000	0	82098000	141480000	0	0	53400000
protein_945	Q2PFD7	Q2PFD7	13	13	13	PH and SEC7 domain-containing protein 3	Psd3	sp|Q2PFD7|PSD3_MOUSE PH and SEC7 domain-containing protein 3 OS=Mus musculus OX=10090 GN=Psd3 PE=1 SV=2	1	13	13	13	5	3	8	9	5	3	8	9	5	3	8	9	11.1	11.1	11.1	114.72	1037	1037	2.3		19	8		0	80.608	4.3	3	5.5	8.6	947780000	104020000	24682000	360700000	458380000	176000000	93583000	116610000
protein_951	Q3TDK6	Q3TDK6	10	10	10	Protein rogdi homolog	Rogdi	sp|Q3TDK6|ROGDI_MOUSE Protein rogdi homolog OS=Mus musculus OX=10090 GN=Rogdi PE=1 SV=2	1	10	10	10	3	9	6	3	3	9	6	3	3	9	6	3	42.9	42.9	42.9	32.1	287	287	3			23		0	73.558	12.9	38.3	23	12.2	494620000	64476000	255330000	145680000	29130000	99021000	130770000	102200000
protein_956	Q3THS6;Q91X83	Q3THS6	4;1	4;1	4;1	S-adenosylmethionine synthase isoform type-2	Mat2a	sp|Q3THS6|METK2_MOUSE S-adenosylmethionine synthase isoform type-2 OS=Mus musculus OX=10090 GN=Mat2a PE=1 SV=2	2	4	4	4	2	2	3	4	2	2	3	4	2	2	3	4	11.6	11.6	11.6	43.688	395	395;396	2.18		9	2		0	32.673	6.6	6.6	8.4	11.6	162410000	20633000	9339900	56970000	75465000	49915000	51153000	47308000
protein_963	Q3TXX4	Q3TXX4	6	6	6	Vesicular glutamate transporter 1	Slc17a7	sp|Q3TXX4|VGLU1_MOUSE Vesicular glutamate transporter 1 OS=Mus musculus OX=10090 GN=Slc17a7 PE=1 SV=2	1	6	6	6	2	5	4	4	2	5	4	4	2	5	4	4	7.3	7.3	7.3	61.637	560	560	1.38	15	5		1	0	69.8	5.9	7.3	6.1	6.1	1177500000	97919000	346700000	247220000	485690000	392140000	188570000	234810000
protein_970	Q3U5Q7	Q3U5Q7	4	4	4	UMP-CMP kinase 2, mitochondrial	Cmpk2	sp|Q3U5Q7|CMPK2_MOUSE UMP-CMP kinase 2, mitochondrial OS=Mus musculus OX=10090 GN=Cmpk2 PE=1 SV=2	1	4	4	4	1	0	2	4	1	0	2	4	1	0	2	4	10.7	10.7	10.7	50.036	447	447	2.29		6		1	0.00076278	24.529	2.2	0	4.5	10.7	68413000	3659300	0	20809000	43945000	0	0	21893000
protein_979	Q3UHB1	Q3UHB1	9	9	9	5-nucleotidase domain-containing protein 3	Nt5dc3	sp|Q3UHB1|NT5D3_MOUSE 5-nucleotidase domain-containing protein 3 OS=Mus musculus OX=10090 GN=Nt5dc3 PE=1 SV=1	1	9	9	9	0	0	6	8	0	0	6	8	0	0	6	8	19.6	19.6	19.6	63.17	546	546	2		14			0	55.622	0	0	11.5	17.6	198490000	0	0	68267000	130230000	0	0	32088000
protein_983	Q3UHD9	Q3UHD9	9	9	9	Arf-GAP with GTPase, ANK repeat and PH domain-containing protein 2	Agap2	sp|Q3UHD9|AGAP2_MOUSE Arf-GAP with GTPase, ANK repeat and PH domain-containing protein 2 OS=Mus musculus OX=10090 GN=Agap2 PE=1 SV=1	1	9	9	9	2	9	3	5	2	9	3	5	2	9	3	5	9.5	9.5	9.5	124.51	1186	1186	1.32	17	3	2		0	62.575	2.5	9.5	2.8	5.4	345080000	11918000	184330000	36451000	112390000	20566000	50047000	40217000
protein_987	Q3UHL1	Q3UHL1	13	13	13	CaM kinase-like vesicle-associated protein	Camkv	sp|Q3UHL1|CAMKV_MOUSE CaM kinase-like vesicle-associated protein OS=Mus musculus OX=10090 GN=Camkv PE=1 SV=2	1	13	13	13	4	8	10	10	4	8	10	10	4	8	10	10	30.3	30.3	30.3	54.819	512	512	1.95	10	23	8		0	144.29	9	18.9	23.2	23.8	2284200000	170430000	553690000	842360000	717740000	229800000	115030000	265580000
protein_988	Q3UHX2	Q3UHX2	3	3	3	28 kDa heat- and acid-stable phosphoprotein	Pdap1	sp|Q3UHX2|HAP28_MOUSE 28 kDa heat- and acid-stable phosphoprotein OS=Mus musculus OX=10090 GN=Pdap1 PE=1 SV=1	1	3	3	3	2	3	1	0	2	3	1	0	2	3	1	0	13.8	13.8	13.8	20.605	181	181	3			6		0	31.49	7.7	13.8	7.2	0	93189000	24639000	49153000	19397000	0	59508000	70535000	0
protein_990	Q3UJU9	Q3UJU9	2	2	2	Regulator of microtubule dynamics protein 3	Rmdn3	sp|Q3UJU9|RMD3_MOUSE Regulator of microtubule dynamics protein 3 OS=Mus musculus OX=10090 GN=Rmdn3 PE=1 SV=2	1	2	2	2	0	0	2	2	0	0	2	2	0	0	2	2	5.1	5.1	5.1	52.028	470	470	2		5			0.0011306	13.997	0	0	5.1	5.1	51788000	0	0	24600000	27189000	0	0	21048000
protein_992	Q3ULJ0	Q3ULJ0	7	6	6	Glycerol-3-phosphate dehydrogenase 1-like protein	Gpd1l	sp|Q3ULJ0|GPD1L_MOUSE Glycerol-3-phosphate dehydrogenase 1-like protein OS=Mus musculus OX=10090 GN=Gpd1l PE=1 SV=2	1	7	6	6	2	3	5	5	2	2	5	5	2	2	5	5	20.5	17.4	17.4	38.225	351	351	2.76		4	13		0	41.529	5.4	8.5	15.1	15.4	375310000	24635000	20866000	193420000	136390000	53489000	47053000	124990000
protein_1018	Q4KMM3	Q4KMM3	27	27	27	Oxidation resistance protein 1	Oxr1	sp|Q4KMM3|OXR1_MOUSE Oxidation resistance protein 1 OS=Mus musculus OX=10090 GN=Oxr1 PE=1 SV=3	1	27	27	27	4	22	12	19	4	22	12	19	4	22	12	19	35.3	35.3	35.3	95.911	866	866	1.22	56	2	6		0	323.31	5.2	29.4	18.6	28.4	2155200000	39665000	963300000	328750000	823520000	42654000	224670000	193450000
protein_1021	Q4VAE3	Q4VAE3	5	5	5	Transmembrane protein 65	Tmem65	sp|Q4VAE3|TMM65_MOUSE Transmembrane protein 65 OS=Mus musculus OX=10090 GN=Tmem65 PE=1 SV=1	1	5	5	5	4	5	4	3	4	5	4	3	4	5	4	3	24.8	24.8	24.8	24.918	234	234	3.83	1			17	0	42.29	18.8	24.8	19.7	13.7	624280000	104260000	355480000	74865000	89677000	120330000	219940000	152570000
protein_1024	Q505F5	Q505F5	5	5	5	Leucine-rich repeat-containing protein 47	Lrrc47	sp|Q505F5|LRC47_MOUSE Leucine-rich repeat-containing protein 47 OS=Mus musculus OX=10090 GN=Lrrc47 PE=1 SV=1	1	5	5	5	0	0	4	4	0	0	4	4	0	0	4	4	10.5	10.5	10.5	63.589	581	581	2		8			0	34.912	0	0	8.1	8.4	93523000	0	0	44948000	48575000	0	0	21379000
protein_1032	Q5DTY9	Q5DTY9	4	4	4	BTB/POZ domain-containing protein KCTD16	Kctd16	sp|Q5DTY9|KCD16_MOUSE BTB/POZ domain-containing protein KCTD16 OS=Mus musculus OX=10090 GN=Kctd16 PE=1 SV=2	1	4	4	4	1	0	3	3	1	0	3	3	1	0	3	3	10.1	10.1	10.1	48.972	427	427	2.25		6	2		0.00076046	24.464	2.6	0	8	7.3	127610000	11651000	0	70424000	45531000	0	0	30006000
protein_1041	Q5M8N0	Q5M8N0	4	4	4	CB1 cannabinoid receptor-interacting protein 1	Cnrip1	sp|Q5M8N0|CNRP1_MOUSE CB1 cannabinoid receptor-interacting protein 1 OS=Mus musculus OX=10090 GN=Cnrip1 PE=1 SV=1	1	4	4	4	3	4	2	4	3	4	2	4	3	4	2	4	26.2	26.2	26.2	18.612	164	164	3.67			7	14	0	33.249	21.3	26.2	14.6	26.2	2094500000	607090000	960490000	255750000	271120000	677000000	506560000	1606100000
protein_1042	Q5M8N4	Q5M8N4	3	3	3	Epimerase family protein SDR39U1	Sdr39u1	sp|Q5M8N4|D39U1_MOUSE Epimerase family protein SDR39U1 OS=Mus musculus OX=10090 GN=Sdr39u1 PE=1 SV=2	1	3	3	3	2	2	3	2	2	2	3	2	2	2	3	2	12.3	12.3	12.3	31.458	293	293	3			9		0.0012821	18.316	7.8	7.8	12.3	7.8	147360000	33824000	51612000	37511000	24416000	71859000	69996000	53034000
protein_1044	Q5PR73	Q5PR73	8	8	8	GTP-binding protein Di-Ras2	Diras2	sp|Q5PR73|DIRA2_MOUSE GTP-binding protein Di-Ras2 OS=Mus musculus OX=10090 GN=Diras2 PE=1 SV=1	1	8	8	8	6	7	6	4	6	7	6	4	6	7	6	4	41.7	41.7	41.7	22.498	199	199	3.04			25	1	0	79.441	34.2	35.2	34.7	21.6	1924500000	304770000	890720000	527850000	201150000	459260000	675440000	428430000
protein_1046	Q5SQX6	Q5SQX6	31	31	21	Cytoplasmic FMR1-interacting protein 2	Cyfip2	sp|Q5SQX6|CYFP2_MOUSE Cytoplasmic FMR1-interacting protein 2 OS=Mus musculus OX=10090 GN=Cyfip2 PE=1 SV=2	1	31	31	21	11	28	12	22	11	28	12	22	6	19	6	14	24.5	24.5	16.1	145.66	1253	1253	1.58	70	25	16	3	0	321.19	9	22.3	9.8	17.8	3222800000	404530000	1405200000	528940000	884130000	196980000	221430000	199050000
protein_1047	Q5SRX1	Q5SRX1	7	7	7	TOM1-like protein 2	Tom1l2	sp|Q5SRX1|TM1L2_MOUSE TOM1-like protein 2 OS=Mus musculus OX=10090 GN=Tom1l2 PE=1 SV=1	1	7	7	7	0	0	4	6	0	0	4	6	0	0	4	6	20.5	20.5	20.5	55.662	507	507	2		12			0	53.765	0	0	9.5	18.5	418670000	0	0	125210000	293460000	0	0	94656000
protein_1054	Q5U458	Q5U458	5	5	5	DnaJ homolog subfamily C member 11	Dnajc11	sp|Q5U458|DJC11_MOUSE DnaJ homolog subfamily C member 11 OS=Mus musculus OX=10090 GN=Dnajc11 PE=1 SV=2	1	5	5	5	1	0	2	5	1	0	2	5	1	0	2	5	11.3	11.3	11.3	63.232	559	559	2		8			0	29.351	2.1	0	3.6	11.3	70553000	3045700	0	13841000	53666000	0	0	16875000
protein_1057	Q60597	Q60597	18	18	18	2-oxoglutarate dehydrogenase, mitochondrial	Ogdh	sp|Q60597|ODO1_MOUSE 2-oxoglutarate dehydrogenase, mitochondrial OS=Mus musculus OX=10090 GN=Ogdh PE=1 SV=3	1	18	18	18	4	15	9	12	4	15	9	12	4	15	9	12	19.4	19.4	19.4	116.45	1023	1023	1.65	35	16	9	2	0	323.31	5.3	15.5	9.9	13.4	2598500000	361570000	977980000	421630000	837300000	255730000	183420000	149790000
protein_1059	Q60605;Q8CI43	Q60605	3;1	3;1	3;1	Myosin light polypeptide 6	Myl6	sp|Q60605|MYL6_MOUSE Myosin light polypeptide 6 OS=Mus musculus OX=10090 GN=Myl6 PE=1 SV=3	2	3	3	3	3	3	2	2	3	3	2	2	3	3	2	2	19.9	19.9	19.9	16.93	151	151;207	3.91			1	10	0.00072046	22.948	19.9	19.9	11.3	11.3	694340000	180110000	420940000	45275000	48015000	230530000	332180000	261850000
protein_1062	Q60634	Q60634	17	17	17	Flotillin-2	Flot2	sp|Q60634|FLOT2_MOUSE Flotillin-2 OS=Mus musculus OX=10090 GN=Flot2 PE=1 SV=2	1	17	17	17	0	1	14	14	0	1	14	14	0	1	14	14	47	47	47	47.037	428	428	2		33			0	119.91	0	2.6	40.2	36.9	677680000	0	4030800	414430000	259220000	0	0	92263000
protein_1064	Q60676	Q60676	6	6	6	Serine/threonine-protein phosphatase 5	Ppp5c	sp|Q60676|PPP5_MOUSE Serine/threonine-protein phosphatase 5 OS=Mus musculus OX=10090 GN=Ppp5c PE=1 SV=3	1	6	6	6	1	0	2	6	1	0	2	6	1	0	2	6	16	16	16	56.876	499	499	2.1		9	1		0	40.632	2.2	0	4.8	16	279830000	5214400	0	86394000	188220000	0	0	82696000
protein_1073	Q60864	Q60864	13	13	13	Stress-induced-phosphoprotein 1	Stip1	sp|Q60864|STIP1_MOUSE Stress-induced-phosphoprotein 1 OS=Mus musculus OX=10090 GN=Stip1 PE=1 SV=1	1	13	13	13	6	2	10	11	6	2	10	11	6	2	10	11	23.4	23.4	23.4	62.581	543	543	2.26		30	6	2	0	94.19	11	1.8	16.9	19.7	1397400000	144610000	9712500	629380000	613720000	126240000	42678000	290590000
protein_1077	Q60930	Q60930	9	9	9	Voltage-dependent anion-selective channel protein 2	Vdac2	sp|Q60930|VDAC2_MOUSE Voltage-dependent anion-selective channel protein 2 OS=Mus musculus OX=10090 GN=Vdac2 PE=1 SV=2	1	9	9	9	7	9	9	7	7	9	9	7	7	9	9	7	35.3	35.3	35.3	31.732	295	295	2.59	11	18	35	10	0	323.31	24.4	35.3	35.3	24.4	12622000000	2036600000	5014000000	3628600000	1943100000	1375100000	3206100000	2490200000
protein_1078	Q60931	Q60931	9	9	9	Voltage-dependent anion-selective channel protein 3	Vdac3	sp|Q60931|VDAC3_MOUSE Voltage-dependent anion-selective channel protein 3 OS=Mus musculus OX=10090 GN=Vdac3 PE=1 SV=1	1	9	9	9	2	9	7	7	2	9	7	7	2	9	7	7	41.7	41.7	41.7	30.752	283	283	2.65	8	4	30	4	0	230.98	8.5	41.7	32.5	27.6	9461800000	856960000	3930900000	2839400000	1834600000	1749500000	3734900000	2452100000
protein_1079	Q60932	Q60932	14	14	14	Voltage-dependent anion-selective channel protein 1	Vdac1	sp|Q60932|VDAC1_MOUSE Voltage-dependent anion-selective channel protein 1 OS=Mus musculus OX=10090 GN=Vdac1 PE=1 SV=3	1	14	14	14	12	13	11	13	12	13	11	13	12	13	11	13	55.4	55.4	55.4	32.351	296	296	2.75	15	19	74	18	0	323.31	47	49	48.3	54.7	50433000000	7045600000	18295000000	15490000000	9602200000	4690600000	8184300000	6956500000
protein_1081	Q60996	Q60996	2	2	2	Serine/threonine-protein phosphatase 2A 56 kDa regulatory subunit gamma isoform	Ppp2r5c	sp|Q60996|2A5G_MOUSE Serine/threonine-protein phosphatase 2A 56 kDa regulatory subunit gamma isoform OS=Mus musculus OX=10090 GN=Ppp2r5c PE=1 SV=2	1	2	2	2	0	0	2	2	0	0	2	2	0	0	2	2	4.6	4.6	4.6	60.824	524	524	2		4			0.0010428	12.264	0	0	4.6	4.6	97410000	0	0	42840000	54570000	0	0	44579000
protein_1085	Q61035;Q99KK9	Q61035	8;3	8;3	8;3	Histidine--tRNA ligase, cytoplasmic	Hars	sp|Q61035|HARS1_MOUSE Histidine--tRNA ligase, cytoplasmic OS=Mus musculus OX=10090 GN=Hars1 PE=1 SV=2	2	8	8	8	0	0	7	7	0	0	7	7	0	0	7	7	15.3	15.3	15.3	57.432	509	509;505	2		14			0	47.126	0	0	13.4	13.6	163570000	0	0	75969000	87597000	0	0	24706000
protein_1094	Q61171	Q61171	7	7	7	Peroxiredoxin-2	Prdx2	sp|Q61171|PRDX2_MOUSE Peroxiredoxin-2 OS=Mus musculus OX=10090 GN=Prdx2 PE=1 SV=3	1	7	7	7	7	7	6	6	7	7	6	6	7	7	6	6	35.9	35.9	35.9	21.778	198	198	3.28	2		27	17	0	323.31	35.9	35.9	27.8	27.8	4714600000	1215800000	2445800000	577350000	475660000	851440000	1298800000	640820000
protein_1105	Q61361	Q61361	8	8	8	Brevican core protein	Bcan	sp|Q61361|PGCB_MOUSE Brevican core protein OS=Mus musculus OX=10090 GN=Bcan PE=1 SV=2	1	8	8	8	4	7	6	6	4	7	6	6	4	7	6	6	8.9	8.9	8.9	95.814	883	883	1.74	19	3	7	2	0	203.97	3.6	8	5.5	5.5	1288900000	128880000	605950000	125670000	428390000	160960000	189750000	134490000
protein_1106	Q61411	Q61411	6	2	2	GTPase HRas;GTPase HRas, N-terminally processed	Hras	sp|Q61411|RASH_MOUSE GTPase HRas OS=Mus musculus OX=10090 GN=Hras PE=1 SV=2	1	6	2	2	5	6	3	3	2	2	2	2	2	2	2	2	45	11.1	11.1	21.298	189	189	3.67			4	8	0.0011293	13.954	31.2	45	16.9	16.9	285090000	68432000	140450000	37841000	38360000	100000000	93047000	114330000
protein_1111	Q61490	Q61490	10	10	10	CD166 antigen	Alcam	sp|Q61490|CD166_MOUSE CD166 antigen OS=Mus musculus OX=10090 GN=Alcam PE=1 SV=3	1	10	10	10	3	8	2	6	3	8	2	6	3	8	2	6	11.5	11.5	11.5	65.091	583	583	1.3	17		3		0	65.483	6	11.5	4.5	6.5	551910000	48077000	325260000	27993000	150580000	54565000	78870000	36358000
protein_1113	Q61548	Q61548	18	18	16	Clathrin coat assembly protein AP180	Snap91	sp|Q61548|AP180_MOUSE Clathrin coat assembly protein AP180 OS=Mus musculus OX=10090 GN=Snap91 PE=1 SV=1	1	18	18	16	6	16	7	14	6	16	7	14	4	14	5	12	25.2	25.2	23	91.85	901	901	1.82	53	20	17	9	0	323.31	8.2	23.4	9.2	19.6	9067700000	869930000	3670400000	1584000000	2943400000	640620000	802760000	688260000
protein_1114	Q61553	Q61553	11	11	11	Fascin	Fscn1	sp|Q61553|FSCN1_MOUSE Fascin OS=Mus musculus OX=10090 GN=Fscn1 PE=1 SV=4	1	11	11	11	5	6	9	10	5	6	9	10	5	6	9	10	26.6	26.6	26.6	54.507	493	493	2.21	7	27	9	4	0	129.3	11.8	13.6	21.9	24.9	2152300000	291010000	168510000	745080000	947700000	209640000	192040000	358810000
protein_1117	Q61598	Q61598	17	12	12	Rab GDP dissociation inhibitor beta	Gdi2	sp|Q61598|GDIB_MOUSE Rab GDP dissociation inhibitor beta OS=Mus musculus OX=10090 GN=Gdi2 PE=1 SV=1	1	17	12	12	12	7	10	14	8	3	6	10	8	3	6	10	41.8	31	31	50.537	445	445	2.47	2	20	9	5	0	89.085	27	18	23.4	37.1	1767100000	295820000	155350000	593050000	722890000	317540000	157620000	201460000
protein_1119	Q61644	Q61644	9	9	9	Protein kinase C and casein kinase substrate in neurons protein 1	Pacsin1	sp|Q61644|PACN1_MOUSE Protein kinase C and casein kinase substrate in neurons protein 1 OS=Mus musculus OX=10090 GN=Pacsin1 PE=1 SV=1	1	9	9	9	4	6	7	7	4	6	7	7	4	6	7	7	24.7	24.7	24.7	50.575	441	441	2.32	3	25	10	3	0	155.1	10.2	19	15.6	19.3	3418300000	369200000	291790000	1384400000	1372900000	453250000	537210000	575460000
protein_1122	Q61701;Q60899;Q60900	Q61701;Q60899	5;4;2	5;4;2	5;4;2	ELAV-like protein 4;ELAV-like protein 2	Elavl4;Elavl2	sp|Q61701|ELAV4_MOUSE ELAV-like protein 4 OS=Mus musculus OX=10090 GN=Elavl4 PE=1 SV=1;sp|Q60899|ELAV2_MOUSE ELAV-like protein 2 OS=Mus musculus OX=10090 GN=Elavl2 PE=1 SV=1	3	5	5	5	0	1	2	4	0	1	2	4	0	1	2	4	14.5	14.5	14.5	42.368	385	385;360;367	2		7			0	29.645	0	2.9	5.7	11.7	104820000	0	3016200	36634000	65169000	0	0	30221000
protein_1123	Q61735	Q61735	3	3	3	Leukocyte surface antigen CD47	Cd47	sp|Q61735|CD47_MOUSE Leukocyte surface antigen CD47 OS=Mus musculus OX=10090 GN=Cd47 PE=1 SV=2	1	3	3	3	0	1	2	3	0	1	2	3	0	1	2	3	12.2	12.2	12.2	33.097	303	303	1.89	1	8			0	125.18	0	4.6	8.9	12.2	948730000	0	51253000	381870000	515600000	0	0	455090000
protein_1128	Q61879	Q61879	51	51	41	Myosin-10	Myh10	sp|Q61879|MYH10_MOUSE Myosin-10 OS=Mus musculus OX=10090 GN=Myh10 PE=1 SV=2	1	51	51	41	5	44	15	35	5	44	15	35	3	35	10	27	27.7	27.7	23.2	228.99	1976	1976	1.13	105	7	1	2	0	323.31	3.3	23.9	9	19.8	3054500000	90181000	1828200000	340040000	796050000	70669000	181180000	110030000
protein_1129	Q61885	Q61885	8	8	8	Myelin-oligodendrocyte glycoprotein	Mog	sp|Q61885|MOG_MOUSE Myelin-oligodendrocyte glycoprotein OS=Mus musculus OX=10090 GN=Mog PE=1 SV=1	1	8	8	8	3	8	6	5	3	8	6	5	3	8	6	5	25.2	25.2	25.2	28.271	246	246	3.12	1		26	6	0	100.61	13	25.2	23.6	19.9	1411100000	100140000	778650000	231110000	301190000	113710000	443740000	163270000
protein_1131	Q61990	Q61990	5	5	4	Poly(rC)-binding protein 2	Pcbp2	sp|Q61990|PCBP2_MOUSE Poly(rC)-binding protein 2 OS=Mus musculus OX=10090 GN=Pcbp2 PE=1 SV=1	1	5	5	4	1	0	5	4	1	0	5	4	1	0	4	3	15.2	15.2	13	38.221	362	362	2.46		8	4	1	0	49.225	3.6	0	15.2	12.2	345450000	61960000	0	139520000	143970000	0	0	98604000
protein_1132	Q62048	Q62048	3	3	3	Astrocytic phosphoprotein PEA-15	Pea15	sp|Q62048|PEA15_MOUSE Astrocytic phosphoprotein PEA-15 OS=Mus musculus OX=10090 GN=Pea15 PE=1 SV=1	1	3	3	3	3	3	2	2	3	3	2	2	3	3	2	2	31.5	31.5	31.5	15.054	130	130	4				11	0	35.257	31.5	31.5	16.9	16.9	632330000	148110000	316150000	118290000	49782000	448930000	247760000	386630000
protein_1135	Q62083	Q62083	3	3	3	PRKCA-binding protein	Pick1	sp|Q62083|PICK1_MOUSE PRKCA-binding protein OS=Mus musculus OX=10090 GN=Pick1 PE=1 SV=2	1	3	3	3	0	0	2	3	0	0	2	3	0	0	2	3	7.9	7.9	7.9	46.597	416	416	2		5			0.0013996	20.96	0	0	5.5	7.9	35153000	0	0	15217000	19936000	0	0	14274000
protein_1137	Q62108	Q62108	27	27	26	Disks large homolog 4	Dlg4	sp|Q62108|DLG4_MOUSE Disks large homolog 4 OS=Mus musculus OX=10090 GN=Dlg4 PE=1 SV=1	1	27	27	26	14	24	11	19	14	24	11	19	14	24	11	18	38.8	38.8	37.6	80.471	724	724	1.77	58	28	20	6	0	224.87	23.5	35.9	19.5	25.7	4020200000	624240000	1644100000	768130000	983790000	325120000	221270000	193740000
protein_1144	Q62261	Q62261	101	101	98	Spectrin beta chain, non-erythrocytic 1	Sptbn1	sp|Q62261|SPTB2_MOUSE Spectrin beta chain, non-erythrocytic 1 OS=Mus musculus OX=10090 GN=Sptbn1 PE=1 SV=2	1	101	101	98	31	94	52	77	31	94	52	77	30	91	52	76	49.4	49.4	48.2	274.22	2363	2363	1.37	296	62	35	5	0	323.31	16.7	46.1	27.8	39.9	24324000000	1412000000	12286000000	3368900000	7257300000	337560000	470440000	380580000
protein_1145	Q62277	Q62277	4	4	4	Synaptophysin	Syp	sp|Q62277|SYPH_MOUSE Synaptophysin OS=Mus musculus OX=10090 GN=Syp PE=1 SV=2	1	4	4	4	2	3	4	4	2	3	4	4	2	3	4	4	13.7	13.7	13.7	34.024	314	314	1.88	11	14	7		0	51.253	6.4	10.5	13.7	13.7	2871600000	254850000	535970000	907740000	1173000000	277860000	481090000	473440000
protein_1148	Q62348	Q62348	8	8	8	Translin	Tsn	sp|Q62348|TSN_MOUSE Translin OS=Mus musculus OX=10090 GN=Tsn PE=1 SV=1	1	8	8	8	3	4	5	6	3	4	5	6	3	4	5	6	35.5	35.5	35.5	26.201	228	228	3			18		0	77.211	16.7	14.5	30.7	31.1	582080000	86056000	83576000	281610000	130830000	205090000	145870000	188480000
protein_1152	Q62418	Q62418	7	7	7	Drebrin-like protein	Dbnl	sp|Q62418|DBNL_MOUSE Drebrin-like protein OS=Mus musculus OX=10090 GN=Dbnl PE=1 SV=2	1	7	7	7	1	0	5	5	1	0	5	5	1	0	5	5	22.5	22.5	22.5	48.699	436	436	2		11			0	57.592	3.7	0	17.4	16.7	237910000	20185000	0	108080000	109640000	0	0	47246000
protein_1154	Q62420	Q62420	13	13	10	Endophilin-A1	Sh3gl2	sp|Q62420|SH3G2_MOUSE Endophilin-A1 OS=Mus musculus OX=10090 GN=Sh3gl2 PE=1 SV=2	1	13	13	10	6	5	11	11	6	5	11	11	5	4	9	9	38.9	38.9	31.2	39.955	352	352	2.46	1	41	20	6	0	323.31	25.9	20.7	33	36.6	5692400000	601260000	273380000	2696400000	2121400000	648950000	519700000	562190000
protein_1156	Q62425	Q62425	5	5	5	Cytochrome c oxidase subunit NDUFA4	Ndufa4	sp|Q62425|NDUA4_MOUSE Cytochrome c oxidase subunit NDUFA4 OS=Mus musculus OX=10090 GN=Ndufa4 PE=1 SV=2	1	5	5	5	5	5	4	3	5	5	4	3	5	5	4	3	47.6	47.6	47.6	9.3267	82	82	3.57	3			18	0	236.75	47.6	47.6	46.3	36.6	5654000000	1751500000	2188200000	1026400000	687910000	2143000000	2226100000	2789100000
protein_1163	Q63810;Q63811	Q63810	6;1	6;1	6;1	Calcineurin subunit B type 1	Ppp3r1	sp|Q63810|CANB1_MOUSE Calcineurin subunit B type 1 OS=Mus musculus OX=10090 GN=Ppp3r1 PE=1 SV=3	2	6	6	6	5	4	2	2	5	4	2	2	5	4	2	2	45.9	45.9	45.9	19.3	170	170;179	4				15	0	323.31	38.8	29.4	12.9	15.3	2369600000	726240000	1183400000	239170000	220850000	1285300000	789040000	848310000
protein_1164	Q63844	Q63844	11	8	8	Mitogen-activated protein kinase 3	Mapk3	sp|Q63844|MK03_MOUSE Mitogen-activated protein kinase 3 OS=Mus musculus OX=10090 GN=Mapk3 PE=1 SV=5	1	11	8	8	2	0	8	8	2	0	6	5	2	0	6	5	28.4	19.5	19.5	43.066	380	380	2.15		11	2		0	50.051	4.7	0	17.1	21.8	211080000	35398000	0	113600000	62090000	0	0	69278000
protein_1170	Q64105	Q64105	7	7	7	Sepiapterin reductase	Spr	sp|Q64105|SPRE_MOUSE Sepiapterin reductase OS=Mus musculus OX=10090 GN=Spr PE=1 SV=1	1	7	7	7	2	7	5	2	2	7	5	2	2	7	5	2	32.2	32.2	32.2	27.883	261	261	3.05			20	1	0	48.926	11.9	32.2	23.8	9.2	552510000	105460000	279020000	145910000	22117000	168520000	310610000	125140000
protein_1174	Q64332	Q64332	21	18	17	Synapsin-2	Syn2	sp|Q64332|SYN2_MOUSE Synapsin-2 OS=Mus musculus OX=10090 GN=Syn2 PE=1 SV=2	1	21	18	17	10	10	19	18	8	8	16	16	8	8	15	15	47.4	43.2	41.8	63.372	586	586	2.16	12	55	20	3	0	323.31	19.1	20.3	36	42.3	13488000000	1337900000	740690000	6356000000	5053600000	1055300000	640590000	1123600000
protein_1176	Q64433	Q64433	6	6	6	10 kDa heat shock protein, mitochondrial	Hspe1	sp|Q64433|CH10_MOUSE 10 kDa heat shock protein, mitochondrial OS=Mus musculus OX=10090 GN=Hspe1 PE=1 SV=2	1	6	6	6	5	6	4	3	5	6	4	3	5	6	4	3	59.8	59.8	59.8	10.963	102	102	4				22	0	75.902	52.9	59.8	41.2	31.4	2165600000	942160000	944600000	162030000	116840000	873280000	507770000	462510000
protein_1184	Q64521	Q64521	23	23	23	Glycerol-3-phosphate dehydrogenase, mitochondrial	Gpd2	sp|Q64521|GPDM_MOUSE Glycerol-3-phosphate dehydrogenase, mitochondrial OS=Mus musculus OX=10090 GN=Gpd2 PE=1 SV=2	1	23	23	23	4	5	17	19	4	5	17	19	4	5	17	19	37.8	37.8	37.8	80.953	727	727	2.04	3	45	5		0	182.77	6.2	9.8	28.3	31.5	1790300000	64367000	106850000	744600000	874460000	142290000	123200000	259210000
protein_1186	Q64674	Q64674	5	5	5	Spermidine synthase	Srm	sp|Q64674|SPEE_MOUSE Spermidine synthase OS=Mus musculus OX=10090 GN=Srm PE=1 SV=1	1	5	5	5	2	4	3	2	2	4	3	2	2	4	3	2	15.9	15.9	15.9	33.995	302	302	3			11		0	32.695	4.6	13.2	7.3	4.6	141150000	18002000	56650000	46570000	19926000	38551000	59627000	53259000
protein_1189	Q68FD5	Q68FD5	74	74	74	Clathrin heavy chain 1	Cltc	sp|Q68FD5|CLH1_MOUSE Clathrin heavy chain 1 OS=Mus musculus OX=10090 GN=Cltc PE=1 SV=3	1	74	74	74	39	70	57	64	39	70	57	64	39	70	57	64	48.2	48.2	48.2	191.55	1675	1675	1.73	282	130	93	24	0	323.31	25.6	46.4	37.1	40.3	69636000000	5506700000	28842000000	13729000000	21558000000	1004200000	1426500000	1237200000
protein_1207	Q6IRU2	Q6IRU2	3	3	3	Tropomyosin alpha-4 chain	Tpm4	sp|Q6IRU2|TPM4_MOUSE Tropomyosin alpha-4 chain OS=Mus musculus OX=10090 GN=Tpm4 PE=1 SV=3	1	3	3	3	2	2	1	0	2	2	1	0	2	2	1	0	10.1	10.1	10.1	28.467	248	248	3			5		0.0012136	17.611	4	4	6	0	31334000	9067700	8425600	13841000	0	20123000	11595000	0
protein_1224	Q6P1F6;Q925E7;Q8BG02;Q6ZWR4	Q6P1F6	7;2;1;1	7;2;1;1	7;2;1;1	Serine/threonine-protein phosphatase 2A 55 kDa regulatory subunit B alpha isoform	Ppp2r2a	sp|Q6P1F6|2ABA_MOUSE Serine/threonine-protein phosphatase 2A 55 kDa regulatory subunit B alpha isoform OS=Mus musculus OX=10090 GN=Ppp2r2a PE=1 SV=1	4	7	7	7	3	4	5	7	3	4	5	7	3	4	5	7	19	19	19	51.691	447	447;453;447;443	2.33		15	5	1	0	58.721	7.6	10.1	13.2	19	540040000	61689000	26552000	180530000	271270000	74579000	43353000	94952000
protein_1234	Q6PAK3	Q6PAK3	4	4	2	Protein arginine N-methyltransferase 8	Prmt8	sp|Q6PAK3|ANM8_MOUSE Protein arginine N-methyltransferase 8 OS=Mus musculus OX=10090 GN=Prmt8 PE=1 SV=2	1	4	4	2	0	0	2	4	0	0	2	4	0	0	2	2	10.9	10.9	5.8	45.276	394	394	2		6			0.00076982	24.782	0	0	5.8	10.9	63804000	0	0	15748000	48056000	0	0	13611000
protein_1240	Q6PD03	Q6PD03	4	4	2	Serine/threonine-protein phosphatase 2A 56 kDa regulatory subunit alpha isoform	Ppp2r5a	sp|Q6PD03|2A5A_MOUSE Serine/threonine-protein phosphatase 2A 56 kDa regulatory subunit alpha isoform OS=Mus musculus OX=10090 GN=Ppp2r5a PE=1 SV=1	1	4	4	2	0	1	3	2	0	1	3	2	0	1	1	1	6	6	4.1	56.346	486	486	2.17		5	1		0.00073746	23.598	0	1.4	4.5	4.5	69697000	0	21784000	26620000	21293000	0	0	19866000
protein_1241	Q6PDL0	Q6PDL0	4	4	4	Cytoplasmic dynein 1 light intermediate chain 2	Dync1li2	sp|Q6PDL0|DC1L2_MOUSE Cytoplasmic dynein 1 light intermediate chain 2 OS=Mus musculus OX=10090 GN=Dync1li2 PE=1 SV=2	1	4	4	4	1	1	2	4	1	1	2	4	1	1	2	4	11.2	11.2	11.2	54.218	492	492	2		8			0.00079239	25.592	1.8	1.8	5.1	11.2	116190000	4173700	4719800	38826000	68468000	0	0	30754000
protein_1247	Q6PER3	Q6PER3	12	12	9	Microtubule-associated protein RP/EB family member 3	Mapre3	sp|Q6PER3|MARE3_MOUSE Microtubule-associated protein RP/EB family member 3 OS=Mus musculus OX=10090 GN=Mapre3 PE=1 SV=1	1	12	12	9	6	10	8	9	6	10	8	9	5	7	6	7	26	26	22.1	31.966	281	281	3.06			34	2	0	323.31	12.5	19.2	18.5	22.8	2039600000	204900000	588160000	980460000	266050000	470550000	634960000	541870000
protein_1257	Q6PHZ2	Q6PHZ2	11	5	5	Calcium/calmodulin-dependent protein kinase type II subunit delta	Camk2d	sp|Q6PHZ2|KCC2D_MOUSE Calcium/calmodulin-dependent protein kinase type II subunit delta OS=Mus musculus OX=10090 GN=Camk2d PE=1 SV=1	1	11	5	5	6	5	9	9	1	0	3	4	1	0	3	4	23.6	11.6	11.6	56.369	499	499	2.25		7		1	0	41.97	12.8	10.2	17.2	20.2	320760000	14601000	0	137950000	168200000	0	0	170730000
protein_1258	Q6PIC6	Q6PIC6	42	42	24	Sodium/potassium-transporting ATPase subunit alpha-3	Atp1a3	sp|Q6PIC6|AT1A3_MOUSE Sodium/potassium-transporting ATPase subunit alpha-3 OS=Mus musculus OX=10090 GN=Atp1a3 PE=1 SV=1	1	42	42	24	29	41	30	37	29	41	30	37	15	23	17	21	41.9	41.9	24.8	111.69	1013	1013	1.64	206	71	48	18	0	323.31	32	41.9	32.5	39.8	83152000000	9778900000	32690000000	13428000000	27255000000	4406200000	3695500000	3497600000
protein_1259	Q6PIE5	Q6PIE5	38	20	20	Sodium/potassium-transporting ATPase subunit alpha-2	Atp1a2	sp|Q6PIE5|AT1A2_MOUSE Sodium/potassium-transporting ATPase subunit alpha-2 OS=Mus musculus OX=10090 GN=Atp1a2 PE=1 SV=1	1	38	20	20	21	36	23	31	7	18	10	15	7	18	10	15	37.7	19.6	19.6	112.22	1020	1020	1.4	61	13	7	2	0	323.31	22.8	35.8	24.9	33.6	5262000000	344540000	2232100000	666870000	2018400000	405970000	398720000	289250000
protein_1267	Q6WVG3	Q6WVG3	3	3	3	BTB/POZ domain-containing protein KCTD12	Kctd12	sp|Q6WVG3|KCD12_MOUSE BTB/POZ domain-containing protein KCTD12 OS=Mus musculus OX=10090 GN=Kctd12 PE=1 SV=1	1	3	3	3	0	0	3	3	0	0	3	3	0	0	3	3	10.4	10.4	10.4	35.892	327	327	2.25		6	2		0.0013184	18.915	0	0	10.4	10.4	102900000	0	0	65895000	37002000	0	0	40514000
protein_1275	Q6ZQ38	Q6ZQ38	23	23	23	Cullin-associated NEDD8-dissociated protein 1	Cand1	sp|Q6ZQ38|CAND1_MOUSE Cullin-associated NEDD8-dissociated protein 1 OS=Mus musculus OX=10090 GN=Cand1 PE=1 SV=2	1	23	23	23	7	22	15	13	7	22	15	13	7	22	15	13	23.1	23.1	23.1	136.33	1230	1230	1.57	56	14	13	3	0	281.64	6.9	21.6	15.8	13.5	2918400000	190190000	1435000000	520610000	772550000	152950000	156730000	143960000
protein_1280	Q6ZWN5	Q6ZWN5	11	11	11	40S ribosomal protein S9	Rps9	sp|Q6ZWN5|RS9_MOUSE 40S ribosomal protein S9 OS=Mus musculus OX=10090 GN=Rps9 PE=1 SV=3	1	11	11	11	6	10	2	2	6	10	2	2	6	10	2	2	40.2	40.2	40.2	22.591	194	194	2.91	2	1	17	3	0	74.66	19.6	36.1	8.2	10.8	687770000	237070000	424890000	20443000	5366300	218840000	259940000	22444000
protein_1289	Q76MZ3;Q7TNP2	Q76MZ3	19;4	19;4	19;4	Serine/threonine-protein phosphatase 2A 65 kDa regulatory subunit A alpha isoform	Ppp2r1a	sp|Q76MZ3|2AAA_MOUSE Serine/threonine-protein phosphatase 2A 65 kDa regulatory subunit A alpha isoform OS=Mus musculus OX=10090 GN=Ppp2r1a PE=1 SV=3	2	19	19	19	8	7	15	18	8	7	15	18	8	7	15	18	37.4	37.4	37.4	65.322	589	589;601	2.28	1	53	13	4	0	323.31	16	12.6	28.4	36	4969600000	345730000	248690000	1926000000	2449100000	515350000	552230000	648560000
protein_1296	Q78ZA7	Q78ZA7	4	3	3	Nucleosome assembly protein 1-like 4	Nap1l4	sp|Q78ZA7|NP1L4_MOUSE Nucleosome assembly protein 1-like 4 OS=Mus musculus OX=10090 GN=Nap1l4 PE=1 SV=1	1	4	3	3	1	1	3	4	0	0	2	3	0	0	2	3	13.1	10.4	10.4	42.679	375	375	2		5			0.0014075	21.339	2.7	2.7	8.5	13.1	108050000	0	0	35417000	72633000	0	0	38507000
protein_1297	Q791T5	Q791T5	5	5	5	Mitochondrial carrier homolog 1	Mtch1	sp|Q791T5|MTCH1_MOUSE Mitochondrial carrier homolog 1 OS=Mus musculus OX=10090 GN=Mtch1 PE=1 SV=1	1	5	5	5	1	3	2	3	1	3	2	3	1	3	2	3	10.5	10.5	10.5	41.565	389	389	2.6		4	6		0	33.118	2.6	8	5.1	8.2	171200000	8075800	42874000	45485000	74768000	0	0	70190000
protein_1298	Q791V5	Q791V5	8	8	8	Mitochondrial carrier homolog 2	Mtch2	sp|Q791V5|MTCH2_MOUSE Mitochondrial carrier homolog 2 OS=Mus musculus OX=10090 GN=Mtch2 PE=1 SV=1	1	8	8	8	5	8	8	8	5	8	8	8	5	8	8	8	32.7	32.7	32.7	33.499	303	303	2.85	2	3	34	1	0	169.71	15.8	32.7	32.7	32.7	1849200000	171960000	769270000	540550000	367410000	561280000	642540000	481600000
protein_1302	Q7TMF3	Q7TMF3	10	10	10	NADH dehydrogenase [ubiquinone] 1 alpha subcomplex subunit 12	Ndufa12	sp|Q7TMF3|NDUAC_MOUSE NADH dehydrogenase [ubiquinone] 1 alpha subcomplex subunit 12 OS=Mus musculus OX=10090 GN=Ndufa12 PE=1 SV=2	1	10	10	10	7	10	5	6	7	10	5	6	7	10	5	6	56.6	56.6	56.6	17.086	145	145	3.97			1	34	0	299.75	49	56.6	36.6	31.7	1792000000	222900000	1038900000	377560000	152610000	332870000	694850000	574810000
protein_1313	Q7TPR4	Q7TPR4	38	38	22	Alpha-actinin-1	Actn1	sp|Q7TPR4|ACTN1_MOUSE Alpha-actinin-1 OS=Mus musculus OX=10090 GN=Actn1 PE=1 SV=1	1	38	38	22	14	38	19	25	14	38	19	25	7	22	8	13	41.6	41.6	25	103.07	892	892	1.48	106	26	23	1	0	323.31	19.3	41.6	22.3	27	8265000000	580790000	3983800000	1359200000	2341200000	348520000	407640000	461700000
protein_1315	Q7TQD2	Q7TQD2	6	6	6	Tubulin polymerization-promoting protein	Tppp	sp|Q7TQD2|TPPP_MOUSE Tubulin polymerization-promoting protein OS=Mus musculus OX=10090 GN=Tppp PE=1 SV=1	1	6	6	6	4	6	5	4	4	6	5	4	4	6	5	4	40.4	40.4	40.4	23.574	218	218	3.17			24	5	0	135.26	23.9	40.4	36.2	23.9	9401300000	1870200000	3253400000	2900100000	1377700000	2424100000	2396100000	2815100000
protein_1316	Q7TQF7	Q7TQF7	18	18	16	Amphiphysin	Amph	sp|Q7TQF7|AMPH_MOUSE Amphiphysin OS=Mus musculus OX=10090 GN=Amph PE=1 SV=1	1	18	18	16	6	11	15	16	6	11	15	16	4	9	13	14	30.5	30.5	29.2	75.012	686	686	1.38	48	11	7		0	323.31	8.9	18.7	26.4	28.7	4889300000	248010000	1785600000	1127200000	1728500000	315110000	428570000	371370000
protein_1318	Q7TQI3	Q7TQI3	8	8	8	Ubiquitin thioesterase OTUB1	Otub1	sp|Q7TQI3|OTUB1_MOUSE Ubiquitin thioesterase OTUB1 OS=Mus musculus OX=10090 GN=Otub1 PE=1 SV=2	1	8	8	8	4	7	6	6	4	7	6	6	4	7	6	6	33.6	33.6	33.6	31.27	271	271	3.03		1	29	2	0	173.59	17	32.1	27.7	26.9	2757100000	214430000	1130200000	931990000	480470000	279300000	560600000	566890000
protein_1319	Q7TSJ2	Q7TSJ2	41	41	41	Microtubule-associated protein 6	Map6	sp|Q7TSJ2|MAP6_MOUSE Microtubule-associated protein 6 OS=Mus musculus OX=10090 GN=Map6 PE=1 SV=2	1	41	41	41	7	38	24	28	7	38	24	28	7	38	24	28	57.1	57.1	57.1	96.449	906	906	1.36	89	30	6	1	0	323.31	8.8	51.9	33	40.9	5263400000	96981000	2710900000	886620000	1568900000	82705000	342410000	231130000
protein_1324	Q80SW1	Q80SW1	10	10	4	Putative adenosylhomocysteinase 2	Ahcyl1	sp|Q80SW1|SAHH2_MOUSE S-adenosylhomocysteine hydrolase-like protein 1 OS=Mus musculus OX=10090 GN=Ahcyl1 PE=1 SV=1	1	10	10	4	3	5	7	9	3	5	7	9	1	2	3	4	17.9	17.9	7.9	58.951	530	530	2	10	21	6	2	0	93.023	5.3	10.2	13.8	16	990900000	84090000	138490000	361240000	407080000	132570000	125130000	165130000
protein_1327	Q80TB8	Q80TB8	2	2	2	Synaptic vesicle membrane protein VAT-1 homolog-like	Vat1l	sp|Q80TB8|VAT1L_MOUSE Synaptic vesicle membrane protein VAT-1 homolog-like OS=Mus musculus OX=10090 GN=Vat1l PE=1 SV=2	1	2	2	2	1	0	2	2	1	0	2	2	1	0	2	2	4.8	4.8	4.8	45.817	417	417	2.2		4	1		0.0011007	13.192	2.9	0	4.8	4.8	95113000	12234000	0	55777000	27102000	0	0	48351000
protein_1329	Q80TJ1	Q80TJ1	29	29	25	Calcium-dependent secretion activator 1	Cadps	sp|Q80TJ1|CAPS1_MOUSE Calcium-dependent secretion activator 1 OS=Mus musculus OX=10090 GN=Cadps PE=1 SV=3	1	29	29	25	8	26	14	19	8	26	14	19	6	22	11	17	24.6	24.6	21.3	153.11	1355	1355	1.57	60	21	11	4	0	323.31	6.1	22.1	11.2	16.2	3783500000	291850000	1656600000	746450000	1088600000	280490000	325080000	229920000
protein_1332	Q80TL4	Q80TL4	10	10	10	Protein KIAA1045	Kiaa1045	sp|Q80TL4|PHF24_MOUSE PHD finger protein 24 OS=Mus musculus OX=10090 GN=Phf24 PE=1 SV=2	1	10	10	10	5	3	9	8	5	3	9	8	5	3	9	8	28	28	28	45.222	400	400	2.46		22	10	3	0	157.1	12.5	7	23.8	22	1313300000	160430000	38826000	717320000	396720000	129900000	129010000	171890000
protein_1334	Q80TM9	Q80TM9	2	2	2	Nischarin	Nisch	sp|Q80TM9|NISCH_MOUSE Nischarin OS=Mus musculus OX=10090 GN=Nisch PE=1 SV=2	1	2	2	2	0	0	2	2	0	0	2	2	0	0	2	2	1.3	1.3	1.3	175.01	1593	1593	1.75	1	3			0.0010864	12.872	0	0	1.3	1.3	25037000	0	0	13029000	12008000	0	0	13593000
protein_1339	Q80TZ3	Q80TZ3	9	9	9	Putative tyrosine-protein phosphatase auxilin	Dnajc6	sp|Q80TZ3|AUXI_MOUSE Putative tyrosine-protein phosphatase auxilin OS=Mus musculus OX=10090 GN=Dnajc6 PE=1 SV=2	1	9	9	9	2	8	6	6	2	8	6	6	2	8	6	6	10	10	10	102.3	938	938	1.5	19	8	2	1	0	74.867	2.5	10	7	7	939130000	28025000	421820000	187240000	302040000	63809000	116560000	103070000
protein_1349	Q80UG5	Q80UG5	12	12	12	Septin-9	Sept9	sp|Q80UG5|SEPT9_MOUSE Septin-9 OS=Mus musculus OX=10090 GN=Septin9 PE=1 SV=1	1	12	12	12	3	6	7	9	3	6	7	9	3	6	7	9	22.8	22.8	22.8	65.574	583	583	1.85	6	18	2		0	97.114	5.3	11	12.7	17.3	717240000	41939000	67703000	321320000	286270000	78579000	15901000	89587000
protein_1365	Q80X95;Q6NTA4	Q80X95;Q6NTA4	2;1	2;1	2;1	Ras-related GTP-binding protein A;Ras-related GTP-binding protein B	Rraga;Rragb	sp|Q80X95|RRAGA_MOUSE Ras-related GTP-binding protein A OS=Mus musculus OX=10090 GN=Rraga PE=1 SV=1;sp|Q6NTA4|RRAGB_MOUSE Ras-related GTP-binding protein B OS=Mus musculus OX=10090 GN=Rragb PE=1 SV=1	2	2	2	2	0	1	2	2	0	1	2	2	0	1	2	2	7.3	7.3	7.3	36.566	313	313;374	3			5		0.0010251	12.059	0	3.2	7.3	7.3	55583000	0	16956000	24783000	13844000	0	0	40489000
protein_1369	Q80XN0	Q80XN0	7	7	7	D-beta-hydroxybutyrate dehydrogenase, mitochondrial	Bdh1	sp|Q80XN0|BDH_MOUSE D-beta-hydroxybutyrate dehydrogenase, mitochondrial OS=Mus musculus OX=10090 GN=Bdh1 PE=1 SV=2	1	7	7	7	5	6	2	4	5	6	2	4	5	6	2	4	21.6	21.6	21.6	38.299	343	343	3			19		0	54.613	17.5	15.7	6.4	15.5	733730000	267990000	299290000	67792000	98657000	268270000	187420000	106420000
protein_1372	Q80YA9;Q8BMA3	Q80YA9	7;1	7;1	7;1	Connector enhancer of kinase suppressor of ras 2	Cnksr2	sp|Q80YA9|CNKR2_MOUSE Connector enhancer of kinase suppressor of ras 2 OS=Mus musculus OX=10090 GN=Cnksr2 PE=1 SV=1	2	7	7	7	2	7	0	2	2	7	0	2	2	7	0	2	8.5	8.5	8.5	117.39	1032	1032;555	1.36	9		2		0	43.387	2.5	8.5	0	2.1	171980000	17387000	126730000	0	27861000	34092000	29581000	0
protein_1379	Q810U3	Q810U3	21	21	21	Neurofascin	Nfasc	sp|Q810U3|NFASC_MOUSE Neurofascin OS=Mus musculus OX=10090 GN=Nfasc PE=1 SV=1	1	21	21	21	6	19	11	17	6	19	11	17	6	19	11	17	19	19	19	137.97	1240	1240	1.41	52	14	5	2	0	230.71	6.2	19	10.1	14.4	3845400000	181100000	1838300000	532830000	1293200000	267660000	349370000	324430000
protein_1387	Q8BFR5	Q8BFR5	14	14	14	Elongation factor Tu, mitochondrial	Tufm	sp|Q8BFR5|EFTU_MOUSE Elongation factor Tu, mitochondrial OS=Mus musculus OX=10090 GN=Tufm PE=1 SV=1	1	14	14	14	7	9	12	12	7	9	12	12	7	9	12	12	36.3	36.3	36.3	49.508	452	452	2.52		30	17	5	0	165.37	19.9	19	30.8	30.1	2380100000	412860000	185490000	952870000	828910000	272070000	190940000	232330000
protein_1392	Q8BFZ9;Q91X78	Q8BFZ9	6;2	6;2	6;2	Erlin-2	Erlin2	sp|Q8BFZ9|ERLN2_MOUSE Erlin-2 OS=Mus musculus OX=10090 GN=Erlin2 PE=1 SV=1	2	6	6	6	0	0	5	5	0	0	5	5	0	0	5	5	16.8	16.8	16.8	37.872	340	340;348	2		10			0	38.216	0	0	13.8	13.5	150940000	0	0	77081000	73858000	0	0	38714000
protein_1393	Q8BG05	Q8BG05	13	13	13	Heterogeneous nuclear ribonucleoprotein A3	Hnrnpa3	sp|Q8BG05|ROA3_MOUSE Heterogeneous nuclear ribonucleoprotein A3 OS=Mus musculus OX=10090 GN=Hnrnpa3 PE=1 SV=1	1	13	13	13	3	3	7	11	3	3	7	11	3	3	7	11	31.7	31.7	31.7	39.652	379	379	2.4		21	14		0	106.35	10.8	12.7	20.1	24.5	2508500000	447720000	131770000	1008300000	920710000	818510000	295890000	359180000
protein_1395	Q8BG32	Q8BG32	10	10	10	26S proteasome non-ATPase regulatory subunit 11	Psmd11	sp|Q8BG32|PSD11_MOUSE 26S proteasome non-ATPase regulatory subunit 11 OS=Mus musculus OX=10090 GN=Psmd11 PE=1 SV=3	1	10	10	10	0	1	8	8	0	1	8	8	0	1	8	8	26.8	26.8	26.8	47.436	422	422	2		17			0	66.676	0	2.4	21.1	22.5	381440000	0	5015400	168780000	207650000	0	0	49322000
protein_1398	Q8BGB7	Q8BGB7	2	2	2	Enolase-phosphatase E1	Enoph1	sp|Q8BGB7|ENOPH_MOUSE Enolase-phosphatase E1 OS=Mus musculus OX=10090 GN=Enoph1 PE=1 SV=1	1	2	2	2	2	2	1	0	2	2	1	0	2	2	1	0	7.8	7.8	7.8	28.6	257	257	3			5		0.001128	13.908	7.8	7.8	4.7	0	107860000	44582000	47321000	15957000	0	91521000	61401000	0
protein_1400	Q8BGH2	Q8BGH2	10	10	10	Sorting and assembly machinery component 50 homolog	Samm50	sp|Q8BGH2|SAM50_MOUSE Sorting and assembly machinery component 50 homolog OS=Mus musculus OX=10090 GN=Samm50 PE=1 SV=1	1	10	10	10	2	3	5	9	2	3	5	9	2	3	5	9	23.9	23.9	23.9	51.863	469	469	2.16		16	3		0	62.241	4.7	7	12.4	21.5	569740000	22916000	19935000	201730000	325160000	63914000	47736000	87733000
protein_1412	Q8BH44	Q8BH44	4	4	4	Coronin-2B	Coro2b	sp|Q8BH44|COR2B_MOUSE Coronin-2B OS=Mus musculus OX=10090 GN=Coro2b PE=1 SV=2	1	4	4	4	0	0	4	3	0	0	4	3	0	0	4	3	6.5	6.5	6.5	54.936	480	480	2		7			0.0007734	24.981	0	0	6.5	4.8	90167000	0	0	44209000	45958000	0	0	19287000
protein_1415	Q8BH59	Q8BH59	26	26	23	Calcium-binding mitochondrial carrier protein Aralar1	Slc25a12	sp|Q8BH59|CMC1_MOUSE Calcium-binding mitochondrial carrier protein Aralar1 OS=Mus musculus OX=10090 GN=Slc25a12 PE=1 SV=1	1	26	26	23	10	13	23	24	10	13	23	24	7	10	20	21	41.4	41.4	37.1	74.569	677	677	1.97	28	69	16	4	0	323.31	15.5	22.6	36	36.2	6499200000	560660000	465460000	2575800000	2897200000	301890000	153640000	378950000
protein_1416	Q8BH66;Q6PA06	Q8BH66	13;1	13;1	12;1	Atlastin-1	Atl1	sp|Q8BH66|ATLA1_MOUSE Atlastin-1 OS=Mus musculus OX=10090 GN=Atl1 PE=1 SV=1	2	13	13	12	1	2	6	9	1	2	6	9	1	2	6	8	28	28	26.7	63.377	558	558;583	2.11		17		1	0	111.68	1.4	4.5	14.2	20.3	493420000	5509700	8453800	144080000	335380000	0	0	81204000
protein_1417	Q8BH95	Q8BH95	8	8	8	Enoyl-CoA hydratase, mitochondrial	Echs1	sp|Q8BH95|ECHM_MOUSE Enoyl-CoA hydratase, mitochondrial OS=Mus musculus OX=10090 GN=Echs1 PE=1 SV=1	1	8	8	8	5	7	6	5	5	7	6	5	5	7	6	5	31.4	31.4	31.4	31.474	290	290	3.04			27	1	0	100.95	23.1	29.7	23.4	23.1	1054700000	196550000	449260000	242110000	166770000	208960000	324520000	261860000
protein_1421	Q8BHE3	Q8BHE3	5	5	5	Caytaxin	Atcay	sp|Q8BHE3|ATCAY_MOUSE Caytaxin OS=Mus musculus OX=10090 GN=Atcay PE=1 SV=1	1	5	5	5	0	0	3	4	0	0	3	4	0	0	3	4	16.7	16.7	16.7	42.178	372	372	2		7			0	32.211	0	0	9.4	13.2	170340000	0	0	69627000	100710000	0	0	53111000
protein_1431	Q8BIJ6	Q8BIJ6	8	8	8	Isoleucine--tRNA ligase, mitochondrial	Iars2	sp|Q8BIJ6|SYIM_MOUSE Isoleucine--tRNA ligase, mitochondrial OS=Mus musculus OX=10090 GN=Iars2 PE=1 SV=1	1	8	8	8	2	8	2	5	2	8	2	5	2	8	2	5	9	9	9	112.8	1012	1012	1.24	15		2		0	51.407	1.8	9	1.8	5.1	316640000	16072000	193970000	16103000	90500000	49209000	52932000	32701000
protein_1433	Q8BIZ1	Q8BIZ1	11	11	11	Ankyrin repeat and sterile alpha motif domain-containing protein 1B	Anks1b	sp|Q8BIZ1|ANS1B_MOUSE Ankyrin repeat and sterile alpha motif domain-containing protein 1B OS=Mus musculus OX=10090 GN=Anks1b PE=1 SV=3	1	11	11	11	5	6	5	8	5	6	5	8	5	6	5	8	7	7	7	139.05	1259	1259	2.64		14	17	2	0	70.45	4.4	4.1	3.7	5.6	565410000	85900000	85205000	203400000	190910000	96486000	64716000	84719000
protein_1437	Q8BJY1	Q8BJY1	7	7	7	26S proteasome non-ATPase regulatory subunit 5	Psmd5	sp|Q8BJY1|PSMD5_MOUSE 26S proteasome non-ATPase regulatory subunit 5 OS=Mus musculus OX=10090 GN=Psmd5 PE=1 SV=4	1	7	7	7	2	0	4	5	2	0	4	5	2	0	4	5	15.3	15.3	15.3	55.971	504	504	2.18		9	2		0	44.66	3.6	0	9.1	10.5	116220000	14991000	0	47647000	53586000	0	0	20882000
protein_1438	Q8BK08	Q8BK08	2	2	2	Transmembrane protein 11, mitochondrial	Tmem11	sp|Q8BK08|TMM11_MOUSE Transmembrane protein 11, mitochondrial OS=Mus musculus OX=10090 GN=Tmem11 PE=1 SV=1	1	2	2	2	2	2	1	1	2	2	1	1	2	2	1	1	12.6	12.6	12.6	21.311	190	190	3.5			3	3	0.001108	13.294	12.6	12.6	4.2	8.4	143350000	47909000	65487000	11299000	18650000	151040000	88311000	0
protein_1442	Q8BKX1	Q8BKX1	14	14	14	Brain-specific angiogenesis inhibitor 1-associated protein 2	Baiap2	sp|Q8BKX1|BAIP2_MOUSE Brain-specific angiogenesis inhibitor 1-associated protein 2 OS=Mus musculus OX=10090 GN=Baiap2 PE=1 SV=2	1	14	14	14	6	3	11	12	6	3	11	12	6	3	11	12	30.3	30.3	30.3	59.236	535	535	2.29		25	10		0	130.69	13.5	6.7	26	27.5	1407700000	211200000	61377000	574350000	560770000	197950000	96852000	155920000
protein_1443	Q8BKZ9	Q8BKZ9	5	5	5	Pyruvate dehydrogenase protein X component, mitochondrial	Pdhx	sp|Q8BKZ9|ODPX_MOUSE Pyruvate dehydrogenase protein X component, mitochondrial OS=Mus musculus OX=10090 GN=Pdhx PE=1 SV=1	1	5	5	5	2	2	4	5	2	2	4	5	2	2	4	5	10	10	10	53.998	501	501	2.29		10	4		0	80.364	3.4	3.8	7.2	10	479500000	34283000	22148000	165240000	257830000	90852000	62083000	93154000
protein_1451	Q8BLK3	Q8BLK3	8	8	8	Limbic system-associated membrane protein	Lsamp	sp|Q8BLK3|LSAMP_MOUSE Limbic system-associated membrane protein OS=Mus musculus OX=10090 GN=Lsamp PE=1 SV=1	1	8	8	8	1	2	6	6	1	2	6	6	1	2	6	6	22.9	22.9	22.9	38.086	341	341	2		18			0	54.002	2.3	7	18.8	17.9	1017100000	6552300	21381000	656300000	332840000	0	0	327400000
protein_1457	Q8BMF3	Q8BMF3	6	6	6	NADP-dependent malic enzyme, mitochondrial	Me3	sp|Q8BMF3|MAON_MOUSE NADP-dependent malic enzyme, mitochondrial OS=Mus musculus OX=10090 GN=Me3 PE=1 SV=2	1	6	6	6	1	0	3	6	1	0	3	6	1	0	3	6	9.8	9.8	9.8	67.098	604	604	2.18		9	2		0	37.159	1.7	0	4.5	9.8	130130000	8641400	0	38623000	82863000	0	0	30935000
protein_1458	Q8BMF4	Q8BMF4	11	11	11	Dihydrolipoyllysine-residue acetyltransferase component of pyruvate dehydrogenase complex, mitochondrial	Dlat	sp|Q8BMF4|ODP2_MOUSE Dihydrolipoyllysine-residue acetyltransferase component of pyruvate dehydrogenase complex, mitochondrial OS=Mus musculus OX=10090 GN=Dlat PE=1 SV=2	1	11	11	11	5	8	9	8	5	8	9	8	5	8	9	8	23.7	23.7	23.7	67.941	642	642	1.98	10	33	7	1	0	138.55	8.7	15.3	18.7	16	2831800000	225060000	325490000	1135700000	1145500000	387400000	400390000	423070000
protein_1465	Q8BNW9	Q8BNW9	5	5	5	Kelch repeat and BTB domain-containing protein 11	Kbtbd11	sp|Q8BNW9|KBTBB_MOUSE Kelch repeat and BTB domain-containing protein 11 OS=Mus musculus OX=10090 GN=Kbtbd11 PE=1 SV=3	1	5	5	5	0	2	2	4	0	2	2	4	0	2	2	4	9	9	9	67.945	633	633	1.25	6	2			0	32.872	0	4.1	3.2	6.3	89341000	0	22798000	16627000	49916000	0	0	18313000
protein_1488	Q8BVE3	Q8BVE3	13	13	13	V-type proton ATPase subunit H	Atp6v1h	sp|Q8BVE3|VATH_MOUSE V-type proton ATPase subunit H OS=Mus musculus OX=10090 GN=Atp6v1h PE=1 SV=1	1	13	13	13	4	4	10	9	4	4	10	9	4	4	10	9	31.9	31.9	31.9	55.854	483	483	2.1	5	28	3	3	0	168.03	9.5	10.1	24.2	21.3	2448100000	269980000	90493000	1243500000	844210000	263250000	314060000	456270000
protein_1491	Q8BW75	Q8BW75	8	8	8	Amine oxidase [flavin-containing] B	Maob	sp|Q8BW75|AOFB_MOUSE Amine oxidase [flavin-containing] B OS=Mus musculus OX=10090 GN=Maob PE=1 SV=4	1	8	8	8	0	1	5	5	0	1	5	5	0	1	5	5	17.1	17.1	17.1	58.557	520	520	2.08		11	1		0	50.988	0	3.5	11.5	11.7	374890000	0	4199200	213620000	157070000	0	0	83519000
protein_1493	Q8BWF0	Q8BWF0	11	11	11	Succinate-semialdehyde dehydrogenase, mitochondrial	Aldh5a1	sp|Q8BWF0|SSDH_MOUSE Succinate-semialdehyde dehydrogenase, mitochondrial OS=Mus musculus OX=10090 GN=Aldh5a1 PE=1 SV=1	1	11	11	11	4	3	9	9	4	3	9	9	4	3	9	9	24.5	24.5	24.5	55.968	523	523	2.3		21	4	2	0	87.457	6.3	7.5	18.9	20.7	1585300000	187450000	55375000	602410000	740060000	225690000	193290000	183430000
protein_1497	Q8BWT1	Q8BWT1	5	5	5	3-ketoacyl-CoA thiolase, mitochondrial	Acaa2	sp|Q8BWT1|THIM_MOUSE 3-ketoacyl-CoA thiolase, mitochondrial OS=Mus musculus OX=10090 GN=Acaa2 PE=1 SV=3	1	5	5	5	2	0	2	5	2	0	2	5	2	0	2	5	16.6	16.6	16.6	41.829	397	397	2.33		7	1	1	0	36.238	8.6	0	4.8	16.6	257380000	69910000	0	20808000	166670000	0	0	35994000
protein_1499	Q8BWY3	Q8BWY3	3	3	3	Eukaryotic peptide chain release factor subunit 1	Etf1	sp|Q8BWY3|ERF1_MOUSE Eukaryotic peptide chain release factor subunit 1 OS=Mus musculus OX=10090 GN=Etf1 PE=1 SV=4	1	3	3	3	0	0	2	3	0	0	2	3	0	0	2	3	8.7	8.7	8.7	49.03	437	437	2		5			0.0013947	20.759	0	0	5.3	8.7	48671000	0	0	21090000	27582000	0	0	17007000
protein_1505	Q8BXZ1	Q8BXZ1	4	4	4	Protein disulfide-isomerase TMX3	Tmx3	sp|Q8BXZ1|TMX3_MOUSE Protein disulfide-isomerase TMX3 OS=Mus musculus OX=10090 GN=Tmx3 PE=1 SV=2	1	4	4	4	0	0	3	3	0	0	3	3	0	0	3	3	8.8	8.8	8.8	51.847	456	456	2		6			0.00079808	25.935	0	0	7	6.4	62685000	0	0	24455000	38230000	0	0	14167000
protein_1507	Q8BYI9	Q8BYI9	27	27	27	Tenascin-R	Tnr	sp|Q8BYI9|TENR_MOUSE Tenascin-R OS=Mus musculus OX=10090 GN=Tnr PE=1 SV=2	1	27	27	27	8	23	17	22	8	23	17	22	8	23	17	22	26.7	26.7	26.7	149.59	1358	1358	1.52	69	30	11	2	0	323.31	7.1	23.2	15.5	22.2	7006300000	366500000	3117100000	1239500000	2283200000	186610000	314510000	255670000
protein_1511	Q8BZ98	Q8BZ98	25	19	15	Dynamin-3	Dnm3	sp|Q8BZ98|DYN3_MOUSE Dynamin-3 OS=Mus musculus OX=10090 GN=Dnm3 PE=1 SV=1	1	25	19	15	7	23	13	19	4	17	7	13	4	13	6	10	29.8	22.8	18.5	97.189	863	863	1.6	37	6	9	3	0	142.14	7.3	26.4	16.7	23.4	911790000	70882000	428240000	116810000	295860000	98228000	94846000	63542000
protein_1516	Q8C0C7	Q8C0C7	3	3	3	Phenylalanine--tRNA ligase alpha subunit	Farsa	sp|Q8C0C7|SYFA_MOUSE Phenylalanine--tRNA ligase alpha subunit OS=Mus musculus OX=10090 GN=Farsa PE=1 SV=1	1	3	3	3	0	0	2	3	0	0	2	3	0	0	2	3	6.7	6.7	6.7	57.598	508	508	2		6			0.001269	18.135	0	0	4.3	6.7	49259000	0	0	9196700	40062000	0	0	10360000
protein_1517	Q8C0E2	Q8C0E2	5	5	5	Vacuolar protein sorting-associated protein 26B	Vps26b	sp|Q8C0E2|VP26B_MOUSE Vacuolar protein sorting-associated protein 26B OS=Mus musculus OX=10090 GN=Vps26b PE=1 SV=1	1	5	5	5	0	0	3	5	0	0	3	5	0	0	3	5	16.4	16.4	16.4	39.124	336	336	2		8			0	32.744	0	0	10.1	16.4	208670000	0	0	87706000	120960000	0	0	56860000
protein_1518	Q8C0L0	Q8C0L0	5	5	5	Thioredoxin-related transmembrane protein 4	Tmx4	sp|Q8C0L0|TMX4_MOUSE Thioredoxin-related transmembrane protein 4 OS=Mus musculus OX=10090 GN=Tmx4 PE=1 SV=2	1	5	5	5	0	0	3	4	0	0	3	4	0	0	3	4	21.2	21.2	21.2	37.131	335	335	1.88	1	7			0	31.405	0	0	12.2	17.9	216300000	0	0	74544000	141750000	0	0	45852000
protein_1519	Q8C0M9	Q8C0M9	6	6	6	Isoaspartyl peptidase/L-asparaginase;Isoaspartyl peptidase/L-asparaginase alpha chain;Isoaspartyl peptidase/L-asparaginase beta chain	Asrgl1	sp|Q8C0M9|ASGL1_MOUSE Isoaspartyl peptidase/L-asparaginase OS=Mus musculus OX=10090 GN=Asrgl1 PE=1 SV=1	1	6	6	6	4	6	3	4	4	6	3	4	4	6	3	4	22.7	22.7	22.7	33.95	326	326	3.21		6	10	12	0	54.246	14.1	22.7	9.5	13.8	729170000	240330000	288300000	103140000	97399000	216530000	169380000	125250000
protein_1527	Q8C1B7	Q8C1B7	13	13	7	Septin-11	Sept11	sp|Q8C1B7|SEP11_MOUSE Septin-11 OS=Mus musculus OX=10090 GN=Septin11 PE=1 SV=4	1	13	13	7	8	6	12	12	8	6	12	12	4	2	6	7	34.3	34.3	22.7	49.694	431	431	2.25	4	40	11	4	0	183.83	16.9	11.6	29.7	31.1	3028500000	232330000	89645000	1358200000	1348300000	186450000	239100000	267140000
protein_1533	Q8C5H8	Q8C5H8	4	4	4	NAD kinase 2, mitochondrial	Nadk2	sp|Q8C5H8|NAKD2_MOUSE NAD kinase 2, mitochondrial OS=Mus musculus OX=10090 GN=Nadk2 PE=1 SV=2	1	4	4	4	0	0	2	4	0	0	2	4	0	0	2	4	10.6	10.6	10.6	50.858	452	452	2		6			0.00073584	23.571	0	0	5.8	10.6	64760000	0	0	21516000	43244000	0	0	18174000
protein_1534	Q8C729	Q8C729	8	8	8	Protein FAM126B	Fam126b	sp|Q8C729|F126B_MOUSE Protein FAM126B OS=Mus musculus OX=10090 GN=Fam126b PE=1 SV=1	1	8	8	8	1	0	5	6	1	0	5	6	1	0	5	6	16.2	16.2	16.2	58.586	530	530	2		12			0	50.763	1.7	0	10.2	11.3	127220000	4285400	0	64377000	58557000	0	0	28763000
protein_1536	Q8C7K6	Q8C7K6	3	3	3	Prenylcysteine oxidase-like	Pcyox1l	sp|Q8C7K6|PCYXL_MOUSE Prenylcysteine oxidase-like OS=Mus musculus OX=10090 GN=Pcyox1l PE=1 SV=1	1	3	3	3	0	0	2	3	0	0	2	3	0	0	2	3	6.9	6.9	6.9	54.874	495	495	2		6			0.0012399	17.857	0	0	4.6	6.9	56248000	0	0	22641000	33608000	0	0	16503000
protein_1541	Q8C878	Q8C878	3	3	3	NEDD8-activating enzyme E1 catalytic subunit	Uba3	sp|Q8C878|UBA3_MOUSE NEDD8-activating enzyme E1 catalytic subunit OS=Mus musculus OX=10090 GN=Uba3 PE=1 SV=2	1	3	3	3	2	0	2	2	2	0	2	2	2	0	2	2	6.5	6.5	6.5	51.737	462	462	2.33		4	2		0.0013228	18.95	4.1	0	4.8	4.8	63586000	14518000	0	24250000	24818000	0	0	19939000
protein_1543	Q8C8R3	Q8C8R3	47	47	37	Ankyrin-2	Ank2	sp|Q8C8R3|ANK2_MOUSE Ankyrin-2 OS=Mus musculus OX=10090 GN=Ank2 PE=1 SV=2	1	47	47	37	6	41	21	33	6	41	21	33	5	31	18	26	14.7	14.7	12.6	426.26	3898	3898	1.27	103	19	5	2	0	323.31	2	12.4	7.2	10.5	4764900000	129060000	2308300000	664080000	1663400000	93297000	255640000	156220000
protein_1547	Q8CAA7	Q8CAA7	14	14	14	Glucose 1,6-bisphosphate synthase	Pgm2l1	sp|Q8CAA7|PGM2L_MOUSE Glucose 1,6-bisphosphate synthase OS=Mus musculus OX=10090 GN=Pgm2l1 PE=1 SV=1	1	14	14	14	7	7	11	11	7	7	11	11	7	7	11	11	24.3	24.3	24.3	70.279	621	621	2.12	7	28	13		0	104.16	11.8	12.4	17.9	19.6	975830000	81099000	111790000	397500000	385450000	82575000	51949000	93071000
protein_1549	Q8CAQ8	Q8CAQ8	28	28	28	MICOS complex subunit Mic60	Immt	sp|Q8CAQ8|MIC60_MOUSE MICOS complex subunit Mic60 OS=Mus musculus OX=10090 GN=Immt PE=1 SV=1	1	28	28	28	7	24	8	20	7	24	8	20	7	24	8	20	39.8	39.8	39.8	83.899	757	757	1.34	60	24	3		0	248.8	10.7	33.9	13.2	31.8	3638400000	130800000	1551600000	543830000	1412200000	140370000	239190000	190060000
protein_1552	Q8CBW3	Q8CBW3	6	4	4	Abl interactor 1	Abi1	sp|Q8CBW3|ABI1_MOUSE Abl interactor 1 OS=Mus musculus OX=10090 GN=Abi1 PE=1 SV=3	1	6	4	4	2	1	4	6	1	1	3	4	1	1	3	4	15.2	10	10	52.287	481	481	2.2		8	2		0	28.058	4.2	2.3	9.4	15.2	302750000	20702000	8125100	128660000	145270000	0	0	74472000
protein_1553	Q8CBY8	Q8CBY8	5	5	5	Dynactin subunit 4	Dctn4	sp|Q8CBY8|DCTN4_MOUSE Dynactin subunit 4 OS=Mus musculus OX=10090 GN=Dctn4 PE=1 SV=1	1	5	5	5	0	1	4	3	0	1	4	3	0	1	4	3	13.5	13.5	13.5	53.056	467	467	2		8			0	31.224	0	1.7	9.9	7.7	104700000	0	1601000	60895000	42202000	0	0	28280000
protein_1555	Q8CC35	Q8CC35	14	14	14	Synaptopodin	Synpo	sp|Q8CC35|SYNPO_MOUSE Synaptopodin OS=Mus musculus OX=10090 GN=Synpo PE=1 SV=2	1	14	14	14	4	13	8	11	4	13	8	11	4	13	8	11	20.6	20.6	20.6	99.55	929	929	1.37	31	8	4		0	121.55	5.3	18.9	11.3	15.7	2040300000	84163000	957500000	206060000	792590000	139520000	204320000	122850000
protein_1559	Q8CCT4;Q8R0A5	Q8CCT4;Q8R0A5	4;3	4;3	4;3	Transcription elongation factor A protein-like 5;Transcription elongation factor A protein-like 3	Tceal5;Tceal3	sp|Q8CCT4|TCAL5_MOUSE Transcription elongation factor A protein-like 5 OS=Mus musculus OX=10090 GN=Tceal5 PE=1 SV=1;sp|Q8R0A5|TCAL3_MOUSE Transcription elongation factor A protein-like 3 OS=Mus musculus OX=10090 GN=Tceal3 PE=1 SV=2	2	4	4	4	0	1	3	3	0	1	3	3	0	1	3	3	20.5	20.5	20.5	22.038	200	200;200	3			7		0	43.898	0	4.5	16	13.5	77391000	0	19780000	45890000	11721000	0	0	49426000
protein_1563	Q8CFI0	Q8CFI0	4	4	2	E3 ubiquitin-protein ligase NEDD4-like	Nedd4l	sp|Q8CFI0|NED4L_MOUSE E3 ubiquitin-protein ligase NEDD4-like OS=Mus musculus OX=10090 GN=Nedd4l PE=1 SV=2	1	4	4	2	2	4	2	2	2	4	2	2	0	2	0	1	4.4	4.4	2.5	115.42	1004	1004	1.46	9	2	2		0.00075873	24.413	1.9	4.4	1.9	2.5	160460000	11857000	83261000	29905000	35433000	24670000	28283000	31178000
protein_1566	Q8CGA0	Q8CGA0	2	2	2	Protein phosphatase 1F	Ppm1f	sp|Q8CGA0|PPM1F_MOUSE Protein phosphatase 1F OS=Mus musculus OX=10090 GN=Ppm1f PE=1 SV=1	1	2	2	2	0	0	2	2	0	0	2	2	0	0	2	2	4.2	4.2	4.2	49.61	452	452	2		4			0.0011514	15.12	0	0	4.2	4.2	34532000	0	0	16806000	17726000	0	0	17344000
protein_1572	Q8CHC4	Q8CHC4	32	32	32	Synaptojanin-1	Synj1	sp|Q8CHC4|SYNJ1_MOUSE Synaptojanin-1 OS=Mus musculus OX=10090 GN=Synj1 PE=1 SV=3	1	32	32	32	11	26	17	25	11	26	17	25	11	26	17	25	22	22	22	172.62	1574	1574	1.22	84	16	2	1	0	311.41	6.4	19.1	11.7	17.7	4600000000	273030000	1862400000	841960000	1622600000	373230000	315490000	329680000
protein_1574	Q8CHH9	Q8CHH9	8	6	6	Septin-8	Sept8	sp|Q8CHH9|SEPT8_MOUSE Septin-8 OS=Mus musculus OX=10090 GN=Septin8 PE=1 SV=4	1	8	6	6	3	3	5	7	2	2	3	5	2	2	3	5	21	17.5	17.5	49.812	429	429	2	5	12	3	1	0	163.99	7.5	7.5	13.8	16.3	902490000	107030000	68693000	395670000	331090000	245140000	239210000	179020000
protein_1580	Q8CI94	Q8CI94	21	21	16	Glycogen phosphorylase, brain form	Pygb	sp|Q8CI94|PYGB_MOUSE Glycogen phosphorylase, brain form OS=Mus musculus OX=10090 GN=Pygb PE=1 SV=3	1	21	21	16	9	20	15	17	9	20	15	17	7	16	12	12	26.9	26.9	20.5	96.729	843	843	1.57	62	22	13	3	0	290.37	12.3	24.9	17.9	20.9	4713900000	439760000	2119000000	757160000	1398000000	266290000	271850000	238540000
protein_1590	Q8JZN5	Q8JZN5	8	8	8	Acyl-CoA dehydrogenase family member 9, mitochondrial	Acad9	sp|Q8JZN5|ACAD9_MOUSE Complex I assembly factor ACAD9, mitochondrial OS=Mus musculus OX=10090 GN=Acad9 PE=1 SV=2	1	8	8	8	1	0	6	6	1	0	6	6	1	0	6	6	13.9	13.9	13.9	68.721	625	625	2.07		13	1		0	51.086	2.1	0	9.9	10.9	261830000	15864000	0	93753000	152210000	0	0	34960000
protein_1595	Q8JZS0	Q8JZS0	7	7	3	Protein lin-7 homolog A	Lin7a	sp|Q8JZS0|LIN7A_MOUSE Protein lin-7 homolog A OS=Mus musculus OX=10090 GN=Lin7a PE=1 SV=2	1	7	7	3	7	7	6	6	7	7	6	6	3	3	2	2	37.3	37.3	14.2	25.992	233	233	3.15			29	5	0	283.99	37.3	37.3	32.6	32.6	2413900000	1194100000	591330000	497530000	130950000	873410000	592960000	523070000
protein_1606	Q8K0S0	Q8K0S0	7	7	5	Phytanoyl-CoA hydroxylase-interacting protein	Phyhip	sp|Q8K0S0|PHYIP_MOUSE Phytanoyl-CoA hydroxylase-interacting protein OS=Mus musculus OX=10090 GN=Phyhip PE=1 SV=1	1	7	7	5	2	6	5	5	2	6	5	5	2	5	3	3	17	17	11.8	37.554	330	330	2.85		3	17		0	94.473	6.7	14.2	12.1	13.9	603260000	23314000	147530000	224400000	208020000	88196000	122390000	316120000
protein_1607	Q8K0T0	Q8K0T0	12	12	12	Reticulon-1	Rtn1	sp|Q8K0T0|RTN1_MOUSE Reticulon-1 OS=Mus musculus OX=10090 GN=Rtn1 PE=1 SV=1	1	12	12	12	3	12	6	7	3	12	6	7	3	12	6	7	19.7	19.7	19.7	83.571	780	780	2	29	11	11	9	0	287.73	3.8	19.7	9.5	10.3	4843400000	462580000	2510000000	1031600000	839260000	754130000	1621900000	1372100000
protein_1608	Q8K0U4	Q8K0U4	21	21	19	Heat shock 70 kDa protein 12A	Hspa12a	sp|Q8K0U4|HS12A_MOUSE Heat shock 70 kDa protein 12A OS=Mus musculus OX=10090 GN=Hspa12a PE=1 SV=1	1	21	21	19	7	11	12	15	7	11	12	15	5	9	10	13	29.9	29.9	28	74.87	675	675	1.9	18	32	8	2	0	194.99	11.1	16.7	20	22.2	1934800000	225610000	452870000	559890000	696410000	144660000	93057000	159930000
protein_1609	Q8K0Z7	Q8K0Z7	3	3	3	Translational activator of cytochrome c oxidase 1	Taco1	sp|Q8K0Z7|TACO1_MOUSE Translational activator of cytochrome c oxidase 1 OS=Mus musculus OX=10090 GN=Taco1 PE=1 SV=1	1	3	3	3	2	3	2	2	2	3	2	2	2	3	2	2	9.2	9.2	9.2	32.314	294	294	3			9		0.0012962	18.655	6.5	9.2	6.5	6.5	61859000	12749000	23462000	15289000	10359000	26731000	26702000	23168000
protein_1610	Q8K183	Q8K183	10	10	10	Pyridoxal kinase	Pdxk	sp|Q8K183|PDXK_MOUSE Pyridoxal kinase OS=Mus musculus OX=10090 GN=Pdxk PE=1 SV=1	1	10	10	10	6	4	6	6	6	4	6	6	6	4	6	6	32.1	32.1	32.1	35.015	312	312	3		6	21	6	0	69.056	17.3	12.2	22.8	24.7	1062200000	225570000	204530000	451340000	180800000	167580000	288480000	448950000
protein_1612	Q8K1M6	Q8K1M6	18	18	18	Dynamin-1-like protein	Dnm1l	sp|Q8K1M6|DNM1L_MOUSE Dynamin-1-like protein OS=Mus musculus OX=10090 GN=Dnm1l PE=1 SV=2	1	18	18	18	8	14	11	14	8	14	11	14	8	14	11	14	31.3	31.3	31.3	82.657	742	742	1.74	36	20	10	4	0	157.31	12.8	22.4	15.5	25.3	1801900000	171880000	781130000	342350000	506500000	92988000	109280000	73051000
protein_1614	Q8K212	Q8K212	14	14	13	Phosphofurin acidic cluster sorting protein 1	Pacs1	sp|Q8K212|PACS1_MOUSE Phosphofurin acidic cluster sorting protein 1 OS=Mus musculus OX=10090 GN=Pacs1 PE=1 SV=2	1	14	14	13	2	13	2	8	2	13	2	8	2	12	2	8	15.3	15.3	14.4	104.83	961	961	1.22	22	4	1		0	87.299	2.4	13.7	2.4	9.8	553440000	11974000	313900000	25879000	201680000	27199000	85532000	27838000
protein_1616	Q8K221	Q8K221	5	5	5	Arfaptin-2	Arfip2	sp|Q8K221|ARFP2_MOUSE Arfaptin-2 OS=Mus musculus OX=10090 GN=Arfip2 PE=1 SV=2	1	5	5	5	0	0	2	5	0	0	2	5	0	0	2	5	10.3	10.3	10.3	37.772	341	341	2		7			0	30.353	0	0	2.9	10.3	48770000	0	0	7651400	41119000	0	0	15409000
protein_1618	Q8K2B3	Q8K2B3	15	15	15	Succinate dehydrogenase [ubiquinone] flavoprotein subunit, mitochondrial	Sdha	sp|Q8K2B3|SDHA_MOUSE Succinate dehydrogenase [ubiquinone] flavoprotein subunit, mitochondrial OS=Mus musculus OX=10090 GN=Sdha PE=1 SV=1	1	15	15	15	6	3	11	15	6	3	11	15	6	3	11	15	23.9	23.9	23.9	72.585	664	664	2.09	4	34	8		0	204.57	10.1	4.7	19.4	23.9	2231600000	153890000	174600000	868250000	1034800000	158900000	162110000	245790000
protein_1625	Q8K310	Q8K310	10	10	10	Matrin-3	Matr3	sp|Q8K310|MATR3_MOUSE Matrin-3 OS=Mus musculus OX=10090 GN=Matr3 PE=1 SV=1	1	10	10	10	2	8	5	7	2	8	5	7	2	8	5	7	13.2	13.2	13.2	94.629	846	846	1.12	22	1	1		0	161.21	3.3	11.1	7	10.2	693420000	15507000	410120000	80631000	187160000	81289000	166030000	113790000
protein_1627	Q8K354	Q8K354	7	6	6	Carbonyl reductase [NADPH] 3	Cbr3	sp|Q8K354|CBR3_MOUSE Carbonyl reductase [NADPH] 3 OS=Mus musculus OX=10090 GN=Cbr3 PE=1 SV=1	1	7	6	6	4	6	5	4	3	5	4	3	3	5	4	3	27.8	24.9	24.9	30.953	277	277	3			16		0	38.63	14.4	23.5	19.5	15.2	223120000	41740000	106790000	50316000	24280000	73728000	71014000	46255000
protein_1644	Q8QZT1	Q8QZT1	10	10	10	Acetyl-CoA acetyltransferase, mitochondrial	Acat1	sp|Q8QZT1|THIL_MOUSE Acetyl-CoA acetyltransferase, mitochondrial OS=Mus musculus OX=10090 GN=Acat1 PE=1 SV=1	1	10	10	10	6	6	8	7	6	6	8	7	6	6	8	7	29.5	29.5	29.5	44.816	424	424	2.47		26	14	3	0	142.7	18.4	18.4	20.5	19.8	2755500000	586960000	212380000	947290000	1008800000	457250000	309000000	319260000
protein_1647	Q8R001	Q8R001	4	3	3	Microtubule-associated protein RP/EB family member 2	Mapre2	sp|Q8R001|MARE2_MOUSE Microtubule-associated protein RP/EB family member 2 OS=Mus musculus OX=10090 GN=Mapre2 PE=1 SV=1	1	4	3	3	0	2	4	3	0	1	3	2	0	1	3	2	12.9	9.8	9.8	36.946	326	326	2.67		3	6		0.0013596	19.626	0	8.3	12.9	10.7	209700000	0	38505000	119750000	51450000	0	0	135070000
protein_1653	Q8R081	Q8R081	5	5	5	Heterogeneous nuclear ribonucleoprotein L	Hnrnpl	sp|Q8R081|HNRPL_MOUSE Heterogeneous nuclear ribonucleoprotein L OS=Mus musculus OX=10090 GN=Hnrnpl PE=1 SV=2	1	5	5	5	0	1	3	4	0	1	3	4	0	1	3	4	10.2	10.2	10.2	63.963	586	586	1.88	1	7			0	33.451	0	2.4	5.1	7.8	249700000	0	6459600	110990000	132240000	0	0	80202000
protein_1654	Q8R0A7	Q8R0A7	6	6	6	Uncharacterized protein KIAA0513	Kiaa0513	sp|Q8R0A7|K0513_MOUSE Uncharacterized protein KIAA0513 OS=Mus musculus OX=10090 GN=Kiaa0513 PE=1 SV=1	1	6	6	6	1	0	4	5	1	0	4	5	1	0	4	5	14.7	14.7	14.7	46.318	407	407	2.09		10	1		0	37.765	2	0	9.6	11.5	262340000	20524000	0	126520000	115300000	0	0	78601000
protein_1665	Q8R191	Q8R191	4	4	4	Synaptogyrin-3	Syngr3	sp|Q8R191|SNG3_MOUSE Synaptogyrin-3 OS=Mus musculus OX=10090 GN=Syngr3 PE=1 SV=1	1	4	4	4	4	4	4	3	4	4	4	3	4	4	4	3	19.7	19.7	19.7	24.561	229	229	2.59	10	2	18	7	0	70.546	19.7	19.7	19.7	15.3	4669300000	1026600000	1296800000	1739000000	606870000	1340400000	1917200000	2098200000
protein_1668	Q8R1I1	Q8R1I1	3	3	3	Cytochrome b-c1 complex subunit 9	Uqcr10	sp|Q8R1I1|QCR9_MOUSE Cytochrome b-c1 complex subunit 9 OS=Mus musculus OX=10090 GN=Uqcr10 PE=1 SV=1	1	3	3	3	3	3	0	1	3	3	0	1	3	3	0	1	50	50	50	7.4454	64	64	4				8	0	41.084	50	50	0	10.9	827860000	490970000	312990000	0	23906000	1150700000	412830000	0
protein_1670	Q8R1Q8	Q8R1Q8	6	6	6	Cytoplasmic dynein 1 light intermediate chain 1	Dync1li1	sp|Q8R1Q8|DC1L1_MOUSE Cytoplasmic dynein 1 light intermediate chain 1 OS=Mus musculus OX=10090 GN=Dync1li1 PE=1 SV=1	1	6	6	6	0	0	3	5	0	0	3	5	0	0	3	5	16.3	16.3	16.3	56.614	523	523	2		8			0	41.965	0	0	8.6	13	247850000	0	0	97047000	150810000	0	0	69085000
protein_1674	Q8R2R9;Q9JKC8	Q8R2R9	5;2	5;2	5;2	AP-3 complex subunit mu-2	Ap3m2	sp|Q8R2R9|AP3M2_MOUSE AP-3 complex subunit mu-2 OS=Mus musculus OX=10090 GN=Ap3m2 PE=1 SV=1	2	5	5	5	0	0	2	5	0	0	2	5	0	0	2	5	17.2	17.2	17.2	46.916	418	418;418	2		7			0	36.336	0	0	4.8	17.2	154950000	0	0	43964000	110980000	0	0	52495000
protein_1679	Q8R366	Q8R366	8	8	8	Immunoglobulin superfamily member 8	Igsf8	sp|Q8R366|IGSF8_MOUSE Immunoglobulin superfamily member 8 OS=Mus musculus OX=10090 GN=Igsf8 PE=1 SV=2	1	8	8	8	4	6	5	7	4	6	5	7	4	6	5	7	16.4	16.4	16.4	65.01	611	611	2.08	9	17	12		0	157.7	7.7	12.6	9.3	13.1	1177400000	82818000	205090000	532670000	356860000	145680000	96614000	157990000
protein_1686	Q8R464	Q8R464	4	4	4	Cell adhesion molecule 4	Cadm4	sp|Q8R464|CADM4_MOUSE Cell adhesion molecule 4 OS=Mus musculus OX=10090 GN=Cadm4 PE=1 SV=1	1	4	4	4	1	0	3	4	1	0	3	4	1	0	3	4	13.4	13.4	13.4	42.723	388	388	2.33		7	1	1	0	28.372	4.6	0	9.3	13.4	264760000	31784000	0	80700000	152270000	0	0	45587000
protein_1696	Q8R5C5	Q8R5C5	7	7	3	Beta-centractin	Actr1b	sp|Q8R5C5|ACTY_MOUSE Beta-centractin OS=Mus musculus OX=10090 GN=Actr1b PE=1 SV=1	1	7	7	3	0	1	5	6	0	1	5	6	0	0	3	3	34.6	34.6	14.6	42.281	376	376	2		15			0	93.309	0	5.1	21.5	29.5	879220000	0	9724200	375720000	493770000	0	0	185390000
protein_1698	Q8R5H6	Q8R5H6	8	8	8	Wiskott-Aldrich syndrome protein family member 1	Wasf1	sp|Q8R5H6|WASF1_MOUSE Wiskott-Aldrich syndrome protein family member 1 OS=Mus musculus OX=10090 GN=Wasf1 PE=1 SV=2	1	8	8	8	2	5	5	7	2	5	5	7	2	5	5	7	15.6	15.6	15.6	61.508	559	559	1.96	8	13	1	3	0	53.531	3.4	10.4	8.1	15.4	752840000	49350000	164730000	167090000	371670000	84232000	62783000	103190000
protein_1717	Q8VDM4	Q8VDM4	7	7	7	26S proteasome non-ATPase regulatory subunit 2	Psmd2	sp|Q8VDM4|PSMD2_MOUSE 26S proteasome non-ATPase regulatory subunit 2 OS=Mus musculus OX=10090 GN=Psmd2 PE=1 SV=1	1	7	7	7	2	5	3	5	2	5	3	5	2	5	3	5	10.2	10.2	10.2	100.2	908	908	1.65	12	1	2	2	0	47.539	2.6	7.3	3.9	7.3	327990000	42069000	119800000	35525000	130600000	68285000	47841000	30973000
protein_1719	Q8VDN2;Q64436	Q8VDN2	41;4	26;0	26;0	Sodium/potassium-transporting ATPase subunit alpha-1	Atp1a1	sp|Q8VDN2|AT1A1_MOUSE Sodium/potassium-transporting ATPase subunit alpha-1 OS=Mus musculus OX=10090 GN=Atp1a1 PE=1 SV=1	2	41	26	26	24	39	28	34	13	24	18	21	13	24	18	21	40.7	25.8	25.8	112.98	1023	1023;1033	1.56	93	23	19	6	0	323.31	26.9	40.7	30.8	33.5	18586000000	1761600000	7580100000	2952600000	6292200000	1566200000	1110900000	1041800000
protein_1722	Q8VDQ8	Q8VDQ8	5	5	5	NAD-dependent protein deacetylase sirtuin-2	Sirt2	sp|Q8VDQ8|SIR2_MOUSE NAD-dependent protein deacetylase sirtuin-2 OS=Mus musculus OX=10090 GN=Sirt2 PE=1 SV=2	1	5	5	5	3	5	3	5	3	5	3	5	3	5	3	5	14.4	14.4	14.4	43.256	389	389	2.71	1	7	19	1	0	59.408	9.5	14.4	8.5	14.4	735050000	76611000	250660000	160790000	246990000	107010000	189630000	133880000
protein_1728	Q8VE70	Q8VE70	4	4	4	Programmed cell death protein 10	Pdcd10	sp|Q8VE70|PDC10_MOUSE Programmed cell death protein 10 OS=Mus musculus OX=10090 GN=Pdcd10 PE=1 SV=1	1	4	4	4	4	3	2	3	4	3	2	3	4	3	2	3	21.2	21.2	21.2	24.715	212	212	3			12		0.00078431	25.231	21.2	15.6	10.4	15.6	243500000	69303000	85352000	50278000	38563000	84635000	77637000	79894000
protein_1730	Q8VED9	Q8VED9	5	5	5	Galectin-related protein	Lgalsl	sp|Q8VED9|LEGL_MOUSE Galectin-related protein OS=Mus musculus OX=10090 GN=Lgalsl PE=1 SV=1	1	5	5	5	3	5	2	3	3	5	2	3	3	5	2	3	37.8	37.8	37.8	18.955	172	172	3.59			7	10	0	48.674	21.5	37.8	13.4	18.6	712790000	207400000	338970000	73345000	93074000	203110000	164900000	239440000
protein_1731	Q8VEH3	Q8VEH3	5	5	4	ADP-ribosylation factor-like protein 8A	Arl8a	sp|Q8VEH3|ARL8A_MOUSE ADP-ribosylation factor-like protein 8A OS=Mus musculus OX=10090 GN=Arl8a PE=1 SV=1	1	5	5	4	4	5	1	0	4	5	1	0	3	4	0	0	29.6	29.6	24.7	21.39	186	186	3.33			12	6	0	31.342	25.8	29.6	4.8	0	402430000	126130000	261720000	14587000	0	169680000	118960000	0
protein_1732	Q8VEH5	Q8VEH5	7	7	7	EPM2A-interacting protein 1	Epm2aip1	sp|Q8VEH5|EPMIP_MOUSE EPM2A-interacting protein 1 OS=Mus musculus OX=10090 GN=Epm2aip1 PE=1 SV=1	1	7	7	7	1	0	4	5	1	0	4	5	1	0	4	5	14.4	14.4	14.4	70.095	606	606	2.1		9	1		0	43.78	1.5	0	9.4	9.6	172120000	2646400	0	76636000	92842000	0	0	34856000
protein_1735	Q8VEM8	Q8VEM8	15	15	15	Phosphate carrier protein, mitochondrial	Slc25a3	sp|Q8VEM8|MPCP_MOUSE Phosphate carrier protein, mitochondrial OS=Mus musculus OX=10090 GN=Slc25a3 PE=1 SV=1	1	15	15	15	8	15	10	12	8	15	10	12	8	15	10	12	33.9	33.9	33.9	39.632	357	357	2.32	31	10	60	2	0	323.31	20.4	33.9	27.5	28.3	13382000000	1035700000	5748900000	3924100000	2673700000	1114000000	3702400000	2593800000
protein_1738	Q8VHI6	Q8VHI6	6	6	6	Wiskott-Aldrich syndrome protein family member 3	Wasf3	sp|Q8VHI6|WASF3_MOUSE Wiskott-Aldrich syndrome protein family member 3 OS=Mus musculus OX=10090 GN=Wasf3 PE=1 SV=1	1	6	6	6	0	0	3	5	0	0	3	5	0	0	3	5	17.2	17.2	17.2	55.203	501	501	2		8			0	39.881	0	0	6.6	14.8	133510000	0	0	69864000	63644000	0	0	51580000
protein_1749	Q91V12	Q91V12	6	6	6	Cytosolic acyl coenzyme A thioester hydrolase	Acot7	sp|Q91V12|BACH_MOUSE Cytosolic acyl coenzyme A thioester hydrolase OS=Mus musculus OX=10090 GN=Acot7 PE=1 SV=2	1	6	6	6	4	5	6	6	4	5	6	6	4	5	6	6	21.5	21.5	21.5	42.536	381	381	2.36	3	18	14	1	0	106.12	13.1	16.3	21.5	21.5	2062300000	230120000	166580000	889420000	776130000	322560000	186720000	263960000
protein_1750	Q91V14;Q9WVL3	Q91V14	24;2	24;2	19;1	Solute carrier family 12 member 5	Slc12a5	sp|Q91V14|S12A5_MOUSE Solute carrier family 12 member 5 OS=Mus musculus OX=10090 GN=Slc12a5 PE=1 SV=2	2	24	24	19	8	20	14	22	8	20	14	22	5	16	10	17	23.4	23.4	19.1	126.27	1138	1138;1083	1.34	69	8	3	5	0	243.46	8.6	21	14.9	21.4	4830600000	234020000	2316500000	604350000	1675800000	384100000	343830000	306910000
protein_1751	Q91V41	Q91V41	11	11	11	Ras-related protein Rab-14	Rab14	sp|Q91V41|RAB14_MOUSE Ras-related protein Rab-14 OS=Mus musculus OX=10090 GN=Rab14 PE=1 SV=3	1	11	11	11	6	8	7	6	6	8	7	6	6	8	7	6	62.8	62.8	62.8	23.897	215	215	3.1			35	4	0	127.17	31.6	35.8	38.1	45.6	2651300000	632380000	985170000	570810000	462990000	664500000	656110000	532710000
protein_1752	Q91V61	Q91V61	14	14	14	Sideroflexin-3	Sfxn3	sp|Q91V61|SFXN3_MOUSE Sideroflexin-3 OS=Mus musculus OX=10090 GN=Sfxn3 PE=1 SV=1	1	14	14	14	9	13	10	7	9	13	10	7	9	13	10	7	52.3	52.3	52.3	35.406	321	321	2.77	7		53		0	194.3	32.4	51.7	41.1	24.9	4732500000	635860000	2066700000	1422700000	607240000	512370000	866500000	721900000
protein_1755	Q91VC3	Q91VC3	9	7	7	Eukaryotic initiation factor 4A-III;Eukaryotic initiation factor 4A-III, N-terminally processed	Eif4a3	sp|Q91VC3|IF4A3_MOUSE Eukaryotic initiation factor 4A-III OS=Mus musculus OX=10090 GN=Eif4a3 PE=1 SV=3	1	9	7	7	0	1	4	8	0	0	2	7	0	0	2	7	23.1	17	17	46.839	411	411	2		9			0	42.036	0	3.9	10.7	20.9	70396000	0	0	18324000	52072000	0	0	13933000
protein_1756	Q91VD9	Q91VD9	25	25	25	NADH-ubiquinone oxidoreductase 75 kDa subunit, mitochondrial	Ndufs1	sp|Q91VD9|NDUS1_MOUSE NADH-ubiquinone oxidoreductase 75 kDa subunit, mitochondrial OS=Mus musculus OX=10090 GN=Ndufs1 PE=1 SV=2	1	25	25	25	14	24	16	20	14	24	16	20	14	24	16	20	38.8	38.8	38.8	79.776	727	727	1.85	61	47	24	8	0	305.77	21.6	37.7	24.5	34.3	6451900000	578320000	2640200000	1386800000	1846500000	377610000	357330000	260330000
protein_1761	Q91VM9	Q91VM9	6	6	6	Inorganic pyrophosphatase 2, mitochondrial	Ppa2	sp|Q91VM9|IPYR2_MOUSE Inorganic pyrophosphatase 2, mitochondrial OS=Mus musculus OX=10090 GN=Ppa2 PE=1 SV=1	1	6	6	6	2	5	0	2	2	5	0	2	2	5	0	2	21.8	21.8	21.8	38.114	330	330	3.18			9	2	0	36.831	7.9	17	0	8.8	177820000	49417000	106910000	0	21494000	87868000	85451000	0
protein_1763	Q91VR2	Q91VR2	11	11	11	ATP synthase subunit gamma, mitochondrial	Atp5c1	sp|Q91VR2|ATPG_MOUSE ATP synthase subunit gamma, mitochondrial OS=Mus musculus OX=10090 GN=Atp5f1c PE=1 SV=1	1	11	11	11	8	10	8	9	8	10	8	9	8	10	8	9	32.9	32.9	32.9	32.886	298	298	3.15	1	1	52	13	0	323.31	27.5	28.9	28.9	27.9	9768100000	1603200000	3937100000	2539300000	1688400000	1616400000	2572800000	1800600000
protein_1769	Q91VZ6	Q91VZ6	4	3	3	Stromal membrane-associated protein 1	Smap1	sp|Q91VZ6|SMAP1_MOUSE Stromal membrane-associated protein 1 OS=Mus musculus OX=10090 GN=Smap1 PE=1 SV=1	1	4	3	3	0	1	4	2	0	1	3	2	0	1	3	2	10	8.2	8.2	47.66	440	440	2		6			0.0013976	20.846	0	3	10	5.2	315200000	0	11422000	196770000	107010000	0	0	103160000
protein_1770	Q91W50	Q91W50	5	5	5	Cold shock domain-containing protein E1	Csde1	sp|Q91W50|CSDE1_MOUSE Cold shock domain-containing protein E1 OS=Mus musculus OX=10090 GN=Csde1 PE=1 SV=1	1	5	5	5	0	3	2	2	0	3	2	2	0	3	2	2	5.8	5.8	5.8	88.79	798	798	1	7				0	31.114	0	3.5	2.3	2.3	62618000	0	40248000	8725800	13644000	0	0	12760000
protein_1773	Q91WC3	Q91WC3	10	10	10	Long-chain-fatty-acid--CoA ligase 6	Acsl6	sp|Q91WC3|ACSL6_MOUSE Long-chain-fatty-acid--CoA ligase 6 OS=Mus musculus OX=10090 GN=Acsl6 PE=1 SV=1	1	10	10	10	2	5	4	9	2	5	4	9	2	5	4	9	16.4	16.4	16.4	78.016	697	697	1.87	6	14	3		0	64.718	2.7	7.2	6.5	14.8	477830000	14702000	87809000	118700000	256620000	36500000	28328000	51427000
protein_1774	Q91WD5	Q91WD5	13	13	13	NADH dehydrogenase [ubiquinone] iron-sulfur protein 2, mitochondrial	Ndufs2	sp|Q91WD5|NDUS2_MOUSE NADH dehydrogenase [ubiquinone] iron-sulfur protein 2, mitochondrial OS=Mus musculus OX=10090 GN=Ndufs2 PE=1 SV=1	1	13	13	13	4	3	11	12	4	3	11	12	4	3	11	12	31.3	31.3	31.3	52.625	463	463	2.24	1	33	10	1	0	169.57	8.9	7.1	26.1	30.7	1761100000	182330000	32292000	624420000	922080000	219330000	58071000	134390000
protein_1777	Q91WQ3	Q91WQ3	10	10	10	Tyrosine--tRNA ligase, cytoplasmic;Tyrosine--tRNA ligase, cytoplasmic, N-terminally processed	Yars	sp|Q91WQ3|SYYC_MOUSE Tyrosine--tRNA ligase, cytoplasmic OS=Mus musculus OX=10090 GN=Yars1 PE=1 SV=3	1	10	10	10	1	0	8	8	1	0	8	8	1	0	8	8	18.6	18.6	18.6	59.105	528	528	2.06		16	1		0	60.996	2.3	0	15.2	15.2	234220000	5335500	0	95195000	133690000	0	0	27473000
protein_1778	Q91WS0	Q91WS0	5	5	5	CDGSH iron-sulfur domain-containing protein 1	Cisd1	sp|Q91WS0|CISD1_MOUSE CDGSH iron-sulfur domain-containing protein 1 OS=Mus musculus OX=10090 GN=Cisd1 PE=1 SV=1	1	5	5	5	4	5	3	3	4	5	3	3	4	5	3	3	44.4	44.4	44.4	12.097	108	108	4				29	0	172.15	42.6	44.4	34.3	34.3	3712200000	851640000	2033300000	410660000	416550000	957820000	1250000000	748070000
protein_1781	Q91X97	Q91X97	8	3	3	Neurocalcin-delta	Ncald	sp|Q91X97|NCALD_MOUSE Neurocalcin-delta OS=Mus musculus OX=10090 GN=Ncald PE=1 SV=4	1	8	3	3	5	7	5	6	3	3	3	3	3	3	3	3	42.5	19.7	19.7	22.245	193	193	3.57			9	12	0	31.423	29.5	38.9	27.5	38.9	1483000000	343250000	697920000	222830000	219000000	299360000	553740000	718610000
protein_1785	Q91XM9	Q91XM9	21	21	20	Disks large homolog 2	Dlg2	sp|Q91XM9|DLG2_MOUSE Disks large homolog 2 OS=Mus musculus OX=10090 GN=Dlg2 PE=1 SV=2	1	21	21	20	4	15	6	14	4	15	6	14	3	14	6	13	32.6	32.6	31.6	94.879	852	852	1.32	34	6	4		0	154.86	5.6	22.9	8	21.2	886480000	49624000	397850000	78614000	360390000	60121000	91177000	66131000
protein_1786	Q91XU3	Q91XU3	3	3	3	Phosphatidylinositol 5-phosphate 4-kinase type-2 gamma	Pip4k2c	sp|Q91XU3|PI42C_MOUSE Phosphatidylinositol 5-phosphate 4-kinase type-2 gamma OS=Mus musculus OX=10090 GN=Pip4k2c PE=1 SV=1	1	3	3	3	0	0	3	2	0	0	3	2	0	0	3	2	7.4	7.4	7.4	47.335	421	421	2		5			0.0013149	18.872	0	0	7.4	5.5	131820000	0	0	64244000	67580000	0	0	45529000
protein_1787	Q91XV3	Q91XV3	7	7	7	Brain acid soluble protein 1	Basp1	sp|Q91XV3|BASP1_MOUSE Brain acid soluble protein 1 OS=Mus musculus OX=10090 GN=Basp1 PE=1 SV=3	1	7	7	7	3	4	6	4	3	4	6	4	3	4	6	4	56.6	56.6	56.6	22.086	226	226	1.89	2	16			0	230.48	30.1	32.3	49.6	29.2	7584500000	350460000	346340000	5278300000	1609400000	2001600000	834000000	2208700000
protein_1796	Q91YT0	Q91YT0	14	14	14	NADH dehydrogenase [ubiquinone] flavoprotein 1, mitochondrial	Ndufv1	sp|Q91YT0|NDUV1_MOUSE NADH dehydrogenase [ubiquinone] flavoprotein 1, mitochondrial OS=Mus musculus OX=10090 GN=Ndufv1 PE=1 SV=1	1	14	14	14	6	5	11	14	6	5	11	14	6	5	11	14	32.1	32.1	32.1	50.834	464	464	2.26	3	32	7	4	0	141.71	12.1	10.3	22.2	32.1	2389600000	273280000	69056000	929740000	1117500000	261900000	248190000	247860000
protein_1799	Q91Z61	Q91Z61	4	4	4	GTP-binding protein Di-Ras1	Diras1	sp|Q91Z61|DIRA1_MOUSE GTP-binding protein Di-Ras1 OS=Mus musculus OX=10090 GN=Diras1 PE=1 SV=1	1	4	4	4	2	4	1	1	2	4	1	1	2	4	1	1	22.2	22.2	22.2	22.264	198	198	3			9		0.00078125	25.134	11.6	22.2	5.6	5.6	136540000	20719000	102310000	8603600	4904600	45724000	102020000	0
protein_1801	Q91ZA3	Q91ZA3	7	7	7	Propionyl-CoA carboxylase alpha chain, mitochondrial	Pcca	sp|Q91ZA3|PCCA_MOUSE Propionyl-CoA carboxylase alpha chain, mitochondrial OS=Mus musculus OX=10090 GN=Pcca PE=1 SV=2	1	7	7	7	0	1	5	5	0	1	5	5	0	1	5	5	11.5	11.5	11.5	79.921	724	724	1.92	1	11			0	42.376	0	2.1	8	7.2	148680000	0	2776000	91730000	54170000	0	0	30132000
protein_1802	Q91ZJ5	Q91ZJ5	8	8	8	UTP--glucose-1-phosphate uridylyltransferase	Ugp2	sp|Q91ZJ5|UGPA_MOUSE UTP--glucose-1-phosphate uridylyltransferase OS=Mus musculus OX=10090 GN=Ugp2 PE=1 SV=3	1	8	8	8	2	2	6	7	2	2	6	7	2	2	6	7	18.7	18.7	18.7	56.979	508	508	2.12		15	2		0	55.862	3.5	4.1	13.4	17.1	436920000	22335000	10503000	182110000	221970000	65136000	61240000	58330000
protein_1806	Q91ZZ3	Q91ZZ3	5	3	3	Beta-synuclein	Sncb	sp|Q91ZZ3|SYUB_MOUSE Beta-synuclein OS=Mus musculus OX=10090 GN=Sncb PE=1 SV=1	1	5	3	3	5	5	5	5	3	3	3	3	3	3	3	3	39.1	30.8	30.8	14.051	133	133	3.79			4	15	0	323.31	39.1	39.1	39.1	39.1	4889400000	1561700000	2173800000	592860000	561070000	1734100000	1630500000	1352900000
protein_1807	Q920E5	Q920E5	3	3	3	Farnesyl pyrophosphate synthase	Fdps	sp|Q920E5|FPPS_MOUSE Farnesyl pyrophosphate synthase OS=Mus musculus OX=10090 GN=Fdps PE=1 SV=1	1	3	3	3	1	1	3	2	1	1	3	2	1	1	3	2	11.6	11.6	11.6	40.581	353	353	2.5		5	5		0.0013689	19.898	3.7	3.7	11.6	7.4	132780000	17168000	11981000	81859000	21772000	0	0	49719000
protein_1811	Q920P5	Q920P5	4	4	4	Adenylate kinase isoenzyme 5	Ak5	sp|Q920P5|KAD5_MOUSE Adenylate kinase isoenzyme 5 OS=Mus musculus OX=10090 GN=Ak5 PE=1 SV=2	1	4	4	4	1	1	3	4	1	1	3	4	1	1	3	4	8.2	8.2	8.2	63.322	562	562	2	1	8	1		0.0008058	26.123	2.1	2.1	6	8.2	143000000	15132000	4060900	55937000	67866000	0	0	36988000
protein_1812	Q921F2	Q921F2	4	4	4	TAR DNA-binding protein 43	Tardbp	sp|Q921F2|TADBP_MOUSE TAR DNA-binding protein 43 OS=Mus musculus OX=10090 GN=Tardbp PE=1 SV=1	1	4	4	4	1	0	3	4	1	0	3	4	1	0	3	4	10.6	10.6	10.6	44.547	414	414	2.2		8	2		0.00082576	27.482	2.9	0	7.7	10.6	226020000	9064800	0	76573000	140390000	0	0	44509000
protein_1814	Q921G7	Q921G7	6	6	6	Electron transfer flavoprotein-ubiquinone oxidoreductase, mitochondrial	Etfdh	sp|Q921G7|ETFD_MOUSE Electron transfer flavoprotein-ubiquinone oxidoreductase, mitochondrial OS=Mus musculus OX=10090 GN=Etfdh PE=1 SV=1	1	6	6	6	0	0	3	5	0	0	3	5	0	0	3	5	11	11	11	68.09	616	616	2		8			0	40.418	0	0	5.8	8.8	105720000	0	0	46232000	59490000	0	0	30142000
protein_1816	Q921I1	Q921I1	9	9	9	Serotransferrin	Tf	sp|Q921I1|TRFE_MOUSE Serotransferrin OS=Mus musculus OX=10090 GN=Tf PE=1 SV=1	1	9	9	9	2	7	3	7	2	7	3	7	2	7	3	7	12.2	12.2	12.2	76.723	697	697	1.57	11	11	1		0	69.283	3	8.9	4.2	10.6	319340000	17399000	134950000	48896000	118100000	63755000	53882000	32585000
protein_1820	Q921M7	Q921M7	13	13	11	Protein FAM49B	Fam49b	sp|Q921M7|CYRIB_MOUSE CYFIP-related Rac1 interactor B OS=Mus musculus OX=10090 GN=Cyrib PE=1 SV=1	1	13	13	11	7	12	8	8	7	12	8	8	6	10	7	7	46	46	39.2	36.776	324	324	3.02			43	1	0	121.19	30.9	41.7	33	33	3483100000	520390000	1664600000	751410000	546650000	627190000	932080000	605810000
protein_1821	Q922B2	Q922B2	12	12	12	Aspartate--tRNA ligase, cytoplasmic	Dars	sp|Q922B2|SYDC_MOUSE Aspartate--tRNA ligase, cytoplasmic OS=Mus musculus OX=10090 GN=Dars1 PE=1 SV=2	1	12	12	12	0	1	6	11	0	1	6	11	0	1	6	11	24.4	24.4	24.4	57.147	501	501	2		18			0	84.333	0	2	11.4	22.6	270680000	0	3533100	81101000	186050000	0	0	36715000
protein_1832	Q922R8	Q922R8	5	5	5	Protein disulfide-isomerase A6	Pdia6	sp|Q922R8|PDIA6_MOUSE Protein disulfide-isomerase A6 OS=Mus musculus OX=10090 GN=Pdia6 PE=1 SV=3	1	5	5	5	0	0	3	4	0	0	3	4	0	0	3	4	14.3	14.3	14.3	48.1	440	440	2		9			0	34.987	0	0	7.7	11.8	199040000	0	0	98809000	100230000	0	0	49687000
protein_1833	Q922S4	Q922S4	8	8	8	cGMP-dependent 3,5-cyclic phosphodiesterase	Pde2a	sp|Q922S4|PDE2A_MOUSE cGMP-dependent 3,5-cyclic phosphodiesterase OS=Mus musculus OX=10090 GN=Pde2a PE=1 SV=4	1	8	8	8	5	5	5	8	5	5	5	8	5	5	5	8	9.6	9.6	9.6	105.62	939	939	1.71	17	4	5	2	0	74.482	5.8	5.6	5.2	9.6	393150000	94183000	85938000	73907000	139130000	109180000	45558000	53592000
protein_1839	Q925I1	Q925I1	4	4	4	ATPase family AAA domain-containing protein 3	Atad3	sp|Q925I1|ATAD3_MOUSE ATPase family AAA domain-containing protein 3 OS=Mus musculus OX=10090 GN=Atad3 PE=1 SV=1	1	4	4	4	0	0	2	4	0	0	2	4	0	0	2	4	6.8	6.8	6.8	66.741	591	591	2		7			0.00078927	25.494	0	0	3.2	6.8	140300000	0	0	29977000	110320000	0	0	27311000
protein_1843	Q99104;P21271	Q99104	45;2	45;2	45;2	Unconventional myosin-Va	Myo5a	sp|Q99104|MYO5A_MOUSE Unconventional myosin-Va OS=Mus musculus OX=10090 GN=Myo5a PE=1 SV=2	2	45	45	45	3	37	11	24	3	37	11	24	3	37	11	24	23.6	23.6	23.6	215.54	1853	1853;1818	1.07	75	6			0	323.31	1.7	20.5	6.2	13.5	2581900000	23926000	1716400000	204560000	637000000	18643000	174340000	86604000
protein_1848	Q99J85	Q99J85	4	4	4	Neuronal pentraxin receptor	Nptxr	sp|Q99J85|NPTXR_MOUSE Neuronal pentraxin receptor OS=Mus musculus OX=10090 GN=Nptxr PE=1 SV=1	1	4	4	4	2	1	2	4	2	1	2	4	2	1	2	4	12.4	12.4	12.4	52.284	493	493	2.67		7	6	2	0.00080972	26.371	4.7	2.8	4.7	12.4	269220000	60755000	31843000	88862000	87763000	113660000	55713000	87562000
protein_1849	Q99J99	Q99J99	8	8	8	3-mercaptopyruvate sulfurtransferase	Mpst	sp|Q99J99|THTM_MOUSE 3-mercaptopyruvate sulfurtransferase OS=Mus musculus OX=10090 GN=Mpst PE=1 SV=4	1	8	8	8	4	6	6	6	4	6	6	6	4	6	6	6	31.3	31.3	31.3	33.097	297	297	3.04			23	1	0	51.955	15.8	24.2	23.2	23.9	254010000	44391000	87440000	77374000	44809000	58143000	72363000	53066000
protein_1852	Q99JI4	Q99JI4	8	8	8	26S proteasome non-ATPase regulatory subunit 6	Psmd6	sp|Q99JI4|PSMD6_MOUSE 26S proteasome non-ATPase regulatory subunit 6 OS=Mus musculus OX=10090 GN=Psmd6 PE=1 SV=1	1	8	8	8	1	1	4	8	1	1	4	8	1	1	4	8	22.9	22.9	22.9	45.536	389	389	2.07		13	1		0	61.127	3.9	3.9	12.3	22.9	219200000	4684300	4236200	81539000	128740000	0	0	40680000
protein_1854	Q99JR1	Q99JR1	5	5	5	Sideroflexin-1	Sfxn1	sp|Q99JR1|SFXN1_MOUSE Sideroflexin-1 OS=Mus musculus OX=10090 GN=Sfxn1 PE=1 SV=3	1	5	5	5	3	4	4	3	3	4	4	3	3	4	4	3	18.6	18.6	18.6	35.649	322	322	3			16		0	34.371	10.6	14.9	14.3	10.6	479850000	29900000	195590000	165850000	88511000	86269000	233020000	157870000
protein_1855	Q99JY0	Q99JY0	8	8	8	Trifunctional enzyme subunit beta, mitochondrial;3-ketoacyl-CoA thiolase	Hadhb	sp|Q99JY0|ECHB_MOUSE Trifunctional enzyme subunit beta, mitochondrial OS=Mus musculus OX=10090 GN=Hadhb PE=1 SV=1	1	8	8	8	3	2	7	8	3	2	7	8	3	2	7	8	17.1	17.1	17.1	51.386	475	475	2.17		19	4		0	54.467	6.9	3.8	14.3	17.1	399870000	26232000	13112000	162720000	197800000	49401000	34514000	69995000
protein_1857	Q99JY9	Q99JY9	11	11	8	Actin-related protein 3	Actr3	sp|Q99JY9|ARP3_MOUSE Actin-related protein 3 OS=Mus musculus OX=10090 GN=Actr3 PE=1 SV=3	1	11	11	8	4	2	8	9	4	2	8	9	2	1	6	6	32.8	32.8	25.1	47.357	418	418	2.29		21	6	1	0	143.56	12.9	5.3	25.6	27.5	1126900000	76906000	16056000	549000000	484900000	132690000	152260000	212620000
protein_1859	Q99K51;Q3V0K9	Q99K51	8;2	8;2	7;1	Plastin-3	Pls3	sp|Q99K51|PLST_MOUSE Plastin-3 OS=Mus musculus OX=10090 GN=Pls3 PE=1 SV=3	2	8	8	7	1	1	3	8	1	1	3	8	1	1	3	7	13.8	13.8	12.4	70.741	630	630;630	2.08		12	1		0	54.306	1.4	1.4	5.6	13.8	264550000	4229800	3386500	56314000	200620000	0	0	37505000
protein_1861	Q99KB8	Q99KB8	4	4	4	Hydroxyacylglutathione hydrolase, mitochondrial	Hagh	sp|Q99KB8|GLO2_MOUSE Hydroxyacylglutathione hydrolase, mitochondrial OS=Mus musculus OX=10090 GN=Hagh PE=1 SV=2	1	4	4	4	2	4	2	2	2	4	2	2	2	4	2	2	16.5	16.5	16.5	34.084	309	309	3			11		0	51.565	7.4	16.5	10	8.7	580870000	108260000	247980000	155440000	69187000	240820000	236130000	242300000
protein_1865	Q99KI0	Q99KI0	34	34	34	Aconitate hydratase, mitochondrial	Aco2	sp|Q99KI0|ACON_MOUSE Aconitate hydratase, mitochondrial OS=Mus musculus OX=10090 GN=Aco2 PE=1 SV=1	1	34	34	34	20	31	25	30	20	31	25	30	20	31	25	30	47.6	47.6	47.6	85.462	780	780	1.79	103	45	36	13	0	323.31	29.4	42.6	39.9	40.8	24917000000	2285100000	10693000000	4154400000	7785300000	1177500000	1304900000	935690000
protein_1866	Q99KJ8	Q99KJ8	9	9	9	Dynactin subunit 2	Dctn2	sp|Q99KJ8|DCTN2_MOUSE Dynactin subunit 2 OS=Mus musculus OX=10090 GN=Dctn2 PE=1 SV=3	1	9	9	9	4	3	7	8	4	3	7	8	4	3	7	8	27.1	27.1	27.1	44.116	402	402	2.27		23	6	1	0	75	9.2	7	18.9	24.6	907290000	102970000	22071000	344160000	438090000	127430000	97808000	88515000
protein_1882	Q99LC3	Q99LC3	9	9	9	NADH dehydrogenase [ubiquinone] 1 alpha subcomplex subunit 10, mitochondrial	Ndufa10	sp|Q99LC3|NDUAA_MOUSE NADH dehydrogenase [ubiquinone] 1 alpha subcomplex subunit 10, mitochondrial OS=Mus musculus OX=10090 GN=Ndufa10 PE=1 SV=1	1	9	9	9	3	3	9	8	3	3	9	8	3	3	9	8	27.3	27.3	27.3	40.603	355	355	2.36		19	8	1	0	65.811	7.9	8.2	27.3	23.9	1720500000	194370000	75976000	662780000	787340000	396880000	130330000	168570000
protein_1883	Q99LC5	Q99LC5	8	8	8	Electron transfer flavoprotein subunit alpha, mitochondrial	Etfa	sp|Q99LC5|ETFA_MOUSE Electron transfer flavoprotein subunit alpha, mitochondrial OS=Mus musculus OX=10090 GN=Etfa PE=1 SV=2	1	8	8	8	5	7	4	2	5	7	4	2	5	7	4	2	32.4	32.4	32.4	35.009	333	333	3			19		0	122.65	19.8	29.4	16.8	9	1348400000	314690000	454700000	414790000	164240000	342370000	322710000	415680000
protein_1884	Q99LD4	Q99LD4	5	5	5	COP9 signalosome complex subunit 1	Gps1	sp|Q99LD4|CSN1_MOUSE COP9 signalosome complex subunit 1 OS=Mus musculus OX=10090 GN=Gps1 PE=1 SV=1	1	5	5	5	1	0	4	5	1	0	4	5	1	0	4	5	11.5	11.5	11.5	53.442	471	471	2.09		10	1		0	31.151	2.1	0	8.1	11.5	180280000	12290000	0	67411000	100580000	0	0	52437000
protein_1891	Q99LX0	Q99LX0	5	5	5	Protein deglycase DJ-1	Park7	sp|Q99LX0|PARK7_MOUSE Parkinson disease protein 7 homolog OS=Mus musculus OX=10090 GN=Park7 PE=1 SV=1	1	5	5	5	3	4	5	5	3	4	5	5	3	4	5	5	22.2	22.2	22.2	20.021	189	189	3.25			18	6	0	37.702	12.7	22.2	22.2	22.2	590980000	102790000	218090000	161370000	108720000	121970000	172320000	104760000
protein_1895	Q99MK8;Q3UYH7	Q99MK8	5;2	5;2	5;2	Beta-adrenergic receptor kinase 1	Adrbk1	sp|Q99MK8|ARBK1_MOUSE Beta-adrenergic receptor kinase 1 OS=Mus musculus OX=10090 GN=Grk2 PE=1 SV=2	2	5	5	5	1	4	2	2	1	4	2	2	1	4	2	2	7.5	7.5	7.5	79.638	689	689;688	1.44	6	2	1		0	36.302	1.3	6.2	2.6	2.6	110170000	3429100	76747000	13706000	16291000	0	0	13402000
protein_1897	Q99MN9	Q99MN9	4	4	4	Propionyl-CoA carboxylase beta chain, mitochondrial	Pccb	sp|Q99MN9|PCCB_MOUSE Propionyl-CoA carboxylase beta chain, mitochondrial OS=Mus musculus OX=10090 GN=Pccb PE=1 SV=2	1	4	4	4	1	0	3	3	1	0	3	3	1	0	3	3	7.6	7.6	7.6	58.408	541	541	2.14		6	1		0.00072939	23.334	1.5	0	4.8	5.7	64954000	6579200	0	28341000	30034000	0	0	16364000
protein_1903	Q99P72	Q99P72	15	15	15	Reticulon-4	Rtn4	sp|Q99P72|RTN4_MOUSE Reticulon-4 OS=Mus musculus OX=10090 GN=Rtn4 PE=1 SV=2	1	15	15	15	3	14	8	12	3	14	8	12	3	14	8	12	16.4	16.4	16.4	126.61	1162	1162	2.03	34	11	4	16	0	323.31	2.9	16.3	7.7	11.2	2937800000	44371000	1699100000	430060000	764300000	157910000	734630000	568610000
protein_1907	Q99PT1	Q99PT1	8	8	8	Rho GDP-dissociation inhibitor 1	Arhgdia	sp|Q99PT1|GDIR1_MOUSE Rho GDP-dissociation inhibitor 1 OS=Mus musculus OX=10090 GN=Arhgdia PE=1 SV=3	1	8	8	8	6	6	7	5	6	6	7	5	6	6	7	5	43.6	43.6	43.6	23.407	204	204	3.03			29	1	0	153.35	30.4	30.4	43.6	30.4	4107000000	897900000	1635500000	1055500000	518200000	1319100000	1608800000	1108100000
protein_1911	Q9CPQ1	Q9CPQ1	7	7	7	Cytochrome c oxidase subunit 6C	Cox6c	sp|Q9CPQ1|COX6C_MOUSE Cytochrome c oxidase subunit 6C OS=Mus musculus OX=10090 GN=Cox6c PE=1 SV=3	1	7	7	7	6	6	4	4	6	6	4	4	6	6	4	4	61.8	61.8	61.8	8.4689	76	76	3.9	1			29	0	323.31	52.6	61.8	44.7	44.7	2968200000	714690000	1374200000	455250000	424080000	675240000	834230000	920760000
protein_1913	Q9CPQ8	Q9CPQ8	6	6	6	ATP synthase subunit g, mitochondrial	Atp5l	sp|Q9CPQ8|ATP5L_MOUSE ATP synthase subunit g, mitochondrial OS=Mus musculus OX=10090 GN=Atp5mg PE=1 SV=1	1	6	6	6	5	6	4	3	5	6	4	3	5	6	4	3	49.5	49.5	49.5	11.424	103	103	3.81	2			29	0	233.26	48.5	49.5	48.5	39.8	3050900000	1081400000	1303700000	328700000	337190000	952540000	428020000	363230000
protein_1915	Q9CPU0	Q9CPU0	6	6	6	Lactoylglutathione lyase	Glo1	sp|Q9CPU0|LGUL_MOUSE Lactoylglutathione lyase OS=Mus musculus OX=10090 GN=Glo1 PE=1 SV=3	1	6	6	6	2	6	3	2	2	6	3	2	2	6	3	2	33.2	33.2	33.2	20.809	184	184	3.18			18	4	0	40.422	10.3	33.2	14.7	10.3	1012500000	198510000	448290000	277180000	88520000	424870000	379130000	266310000
protein_1916	Q9CPU4	Q9CPU4	4	4	4	Microsomal glutathione S-transferase 3	Mgst3	sp|Q9CPU4|MGST3_MOUSE Microsomal glutathione S-transferase 3 OS=Mus musculus OX=10090 GN=Mgst3 PE=1 SV=1	1	4	4	4	3	3	3	2	3	3	3	2	3	3	3	2	23.5	23.5	23.5	16.958	153	153	3.47	2	1	1	13	0	239.43	18.3	22.9	22.9	17.6	1536300000	302420000	769470000	202290000	262120000	665860000	785230000	587910000
protein_1917	Q9CPV4	Q9CPV4	8	8	8	Glyoxalase domain-containing protein 4	Glod4	sp|Q9CPV4|GLOD4_MOUSE Glyoxalase domain-containing protein 4 OS=Mus musculus OX=10090 GN=Glod4 PE=1 SV=1	1	8	8	8	6	6	6	5	6	6	6	5	6	6	6	5	37.2	37.2	37.2	33.316	298	298	3.04			24	1	0	228.25	29.9	26.5	27.5	22.1	1216500000	293850000	419380000	353470000	149850000	283150000	256430000	206520000
protein_1922	Q9CPY7	Q9CPY7	5	5	5	Cytosol aminopeptidase	Lap3	sp|Q9CPY7|AMPL_MOUSE Cytosol aminopeptidase OS=Mus musculus OX=10090 GN=Lap3 PE=1 SV=3	1	5	5	5	2	2	3	5	2	2	3	5	2	2	3	5	12.3	12.3	12.3	56.141	519	519	2.25		10	1	1	0	44.101	4	4	6.4	12.3	213330000	14951000	9163400	48325000	140890000	41498000	55872000	44743000
protein_1926	Q9CQ54	Q9CQ54	7	7	7	NADH dehydrogenase [ubiquinone] 1 subunit C2	Ndufc2	sp|Q9CQ54|NDUC2_MOUSE NADH dehydrogenase [ubiquinone] 1 subunit C2 OS=Mus musculus OX=10090 GN=Ndufc2 PE=1 SV=1	1	7	7	7	4	6	3	3	4	6	3	3	4	6	3	3	45.8	45.8	45.8	14.164	120	120	4				19	0	55.418	26.7	44.2	20	25.8	812520000	175850000	431470000	121980000	83228000	357200000	329840000	329680000
protein_1927	Q9CQ60	Q9CQ60	4	4	4	6-phosphogluconolactonase	Pgls	sp|Q9CQ60|6PGL_MOUSE 6-phosphogluconolactonase OS=Mus musculus OX=10090 GN=Pgls PE=1 SV=1	1	4	4	4	2	3	3	2	2	3	3	2	2	3	3	2	21	21	21	27.254	257	257	3			10		0.0007837	25.225	8.9	15.2	14.8	8.9	180280000	37565000	84481000	37573000	20657000	94329000	80848000	49735000
protein_1929	Q9CQ69	Q9CQ69	5	5	5	Cytochrome b-c1 complex subunit 8	Uqcrq	sp|Q9CQ69|QCR8_MOUSE Cytochrome b-c1 complex subunit 8 OS=Mus musculus OX=10090 GN=Uqcrq PE=1 SV=3	1	5	5	5	5	5	4	3	5	5	4	3	5	5	4	3	45.1	45.1	45.1	9.7681	82	82	3.7	2			18	0	82.279	45.1	45.1	42.7	34.1	1991900000	552350000	930230000	241460000	267880000	648710000	617420000	555550000
protein_1936	Q9CQA3	Q9CQA3	10	10	10	Succinate dehydrogenase [ubiquinone] iron-sulfur subunit, mitochondrial	Sdhb	sp|Q9CQA3|SDHB_MOUSE Succinate dehydrogenase [ubiquinone] iron-sulfur subunit, mitochondrial OS=Mus musculus OX=10090 GN=Sdhb PE=1 SV=1	1	10	10	10	7	10	6	5	7	10	6	5	7	10	6	5	32.6	32.6	32.6	31.814	282	282	3			31		0	77.505	26.6	32.6	22	18.4	2094100000	483270000	1072900000	294740000	243280000	465070000	507490000	281850000
protein_1941	Q9CQD1	Q9CQD1	6	3	3	Ras-related protein Rab-5A	Rab5a	sp|Q9CQD1|RAB5A_MOUSE Ras-related protein Rab-5A OS=Mus musculus OX=10090 GN=Rab5a PE=1 SV=1	1	6	3	3	5	6	5	5	2	3	2	2	2	3	2	2	35.8	20.9	20.9	23.598	215	215	3.17			10	2	0	30.909	27	35.8	27	27	726460000	140910000	329770000	160360000	95420000	290990000	367180000	271840000
protein_1948	Q9CQI6	Q9CQI6	9	9	9	Coactosin-like protein	Cotl1	sp|Q9CQI6|COTL1_MOUSE Coactosin-like protein OS=Mus musculus OX=10090 GN=Cotl1 PE=1 SV=3	1	9	9	9	5	8	6	4	5	8	6	4	5	8	6	4	47.9	47.9	47.9	15.944	142	142	4				23	0	89.37	28.2	47.9	28.2	21.1	818310000	142540000	406310000	172790000	96660000	178380000	307810000	439150000
protein_1954	Q9CQQ7	Q9CQQ7	16	16	16	ATP synthase F(0) complex subunit B1, mitochondrial	Atp5f1	sp|Q9CQQ7|AT5F1_MOUSE ATP synthase F(0) complex subunit B1, mitochondrial OS=Mus musculus OX=10090 GN=Atp5pb PE=1 SV=1	1	16	16	16	14	15	14	14	14	15	14	14	14	15	14	14	51.2	51.2	51.2	28.948	256	256	3.07		1	74	7	0	323.31	43.4	47.3	51.2	51.2	7239700000	1295700000	2966700000	2003600000	973690000	1066200000	1007600000	695260000
protein_1956	Q9CQR4	Q9CQR4	4	4	4	Acyl-coenzyme A thioesterase 13;Acyl-coenzyme A thioesterase 13, N-terminally processed	Acot13	sp|Q9CQR4|ACO13_MOUSE Acyl-coenzyme A thioesterase 13 OS=Mus musculus OX=10090 GN=Acot13 PE=1 SV=1	1	4	4	4	3	4	3	3	3	4	3	3	3	4	3	3	34.3	34.3	34.3	15.183	140	140	4				14	0	112.98	21.4	34.3	21.4	21.4	1404200000	310620000	689570000	190110000	213920000	531300000	655540000	536670000
protein_1963	Q9CQV8	Q9CQV8	13	9	7	14-3-3 protein beta/alpha;14-3-3 protein beta/alpha, N-terminally processed	Ywhab	sp|Q9CQV8|1433B_MOUSE 14-3-3 protein beta/alpha OS=Mus musculus OX=10090 GN=Ywhab PE=1 SV=3	1	13	9	7	8	10	9	10	5	7	6	7	4	5	5	6	63.4	50	43.5	28.086	246	246	3.05		2	38	4	0	323.31	36.2	49.2	40.2	48	14136000000	1496800000	4083900000	6218300000	2336900000	5398400000	5678000000	4494700000
protein_1964	Q9CQW1	Q9CQW1	7	7	7	Synaptobrevin homolog YKT6	Ykt6	sp|Q9CQW1|YKT6_MOUSE Synaptobrevin homolog YKT6 OS=Mus musculus OX=10090 GN=Ykt6 PE=1 SV=1	1	7	7	7	2	5	5	2	2	5	5	2	2	5	5	2	38.9	38.9	38.9	22.314	198	198	3.07			14	1	0	46.09	10.6	27.3	26.8	10.6	403480000	82324000	168170000	118720000	34265000	198630000	135490000	80872000
protein_1965	Q9CQW2	Q9CQW2	3	2	2	ADP-ribosylation factor-like protein 8B	Arl8b	sp|Q9CQW2|ARL8B_MOUSE ADP-ribosylation factor-like protein 8B OS=Mus musculus OX=10090 GN=Arl8b PE=1 SV=1	1	3	2	2	3	3	3	2	2	2	2	2	2	2	2	2	13.4	8.6	8.6	21.539	186	186	3.62			3	5	0.0010995	13.161	13.4	13.4	13.4	8.6	114080000	26302000	34475000	25698000	27603000	85935000	73618000	121080000
protein_1968	Q9CQZ5	Q9CQZ5	7	7	7	NADH dehydrogenase [ubiquinone] 1 alpha subcomplex subunit 6	Ndufa6	sp|Q9CQZ5|NDUA6_MOUSE NADH dehydrogenase [ubiquinone] 1 alpha subcomplex subunit 6 OS=Mus musculus OX=10090 GN=Ndufa6 PE=1 SV=1	1	7	7	7	5	7	4	2	5	7	4	2	5	7	4	2	41.2	41.2	41.2	15.283	131	131	4				20	0	132.87	39.7	41.2	20.6	12.2	1359400000	500280000	627790000	162750000	68602000	607170000	524340000	400420000
protein_1976	Q9CR57	Q9CR57	3	3	3	60S ribosomal protein L14	Rpl14	sp|Q9CR57|RL14_MOUSE 60S ribosomal protein L14 OS=Mus musculus OX=10090 GN=Rpl14 PE=1 SV=3	1	3	3	3	2	3	3	2	2	3	3	2	2	3	3	2	17.1	17.1	17.1	23.564	217	217	2.94		2	13	1	0	31.265	11.5	17.1	17.1	11.5	767450000	173470000	286920000	198900000	108170000	325550000	247570000	175020000
protein_1978	Q9CR62	Q9CR62	11	11	11	Mitochondrial 2-oxoglutarate/malate carrier protein	Slc25a11	sp|Q9CR62|M2OM_MOUSE Mitochondrial 2-oxoglutarate/malate carrier protein OS=Mus musculus OX=10090 GN=Slc25a11 PE=1 SV=3	1	11	11	11	10	11	8	9	10	11	8	9	10	11	8	9	41.1	41.1	41.1	34.155	314	314	2.71	14	2	47	9	0	272.4	38.2	41.1	28	30.9	6783100000	1561200000	2635300000	1631400000	955200000	934680000	872350000	675560000
protein_1981	Q9CR68	Q9CR68	11	11	11	Cytochrome b-c1 complex subunit Rieske, mitochondrial;Cytochrome b-c1 complex subunit 11	Uqcrfs1	sp|Q9CR68|UCRI_MOUSE Cytochrome b-c1 complex subunit Rieske, mitochondrial OS=Mus musculus OX=10090 GN=Uqcrfs1 PE=1 SV=1	1	11	11	11	7	8	5	4	7	8	5	4	7	8	5	4	43.4	43.4	43.4	29.367	274	274	3.24	1		23	10	0	107.12	19.7	32.8	13.9	11.3	2803700000	446150000	1011600000	998860000	347020000	427760000	788920000	546280000
protein_1982	Q9CR95	Q9CR95	4	4	4	Adaptin ear-binding coat-associated protein 1	Necap1	sp|Q9CR95|NECP1_MOUSE Adaptin ear-binding coat-associated protein 1 OS=Mus musculus OX=10090 GN=Necap1 PE=1 SV=2	1	4	4	4	4	2	3	4	4	2	3	4	4	2	3	4	16.7	16.7	16.7	29.639	275	275	2.42		11	8		0	36.16	16.7	7.3	13.5	16.7	633330000	107930000	39596000	237130000	248680000	126930000	118530000	105280000
protein_1995	Q9CVB6	Q9CVB6	16	16	16	Actin-related protein 2/3 complex subunit 2	Arpc2	sp|Q9CVB6|ARPC2_MOUSE Actin-related protein 2/3 complex subunit 2 OS=Mus musculus OX=10090 GN=Arpc2 PE=1 SV=3	1	16	16	16	8	14	15	9	8	14	15	9	8	14	15	9	46.7	46.7	46.7	34.357	300	300	3.04	1		61	5	0	323.31	25	42.7	44.3	34.3	3553900000	318340000	1406300000	1285400000	543840000	329810000	723920000	655030000
protein_2001	Q9CWS0	Q9CWS0	9	9	8	N(G),N(G)-dimethylarginine dimethylaminohydrolase 1	Ddah1	sp|Q9CWS0|DDAH1_MOUSE N(G),N(G)-dimethylarginine dimethylaminohydrolase 1 OS=Mus musculus OX=10090 GN=Ddah1 PE=1 SV=3	1	9	9	8	5	6	9	7	5	6	9	7	4	5	8	6	38.2	38.2	35.4	31.381	285	285	2.82		7	26	1	0	323.31	20	23.5	38.2	27	1056800000	187340000	198880000	371080000	299500000	200460000	123170000	255040000
protein_2002	Q9CWZ7	Q9CWZ7	10	10	10	Gamma-soluble NSF attachment protein	Napg	sp|Q9CWZ7|SNAG_MOUSE Gamma-soluble NSF attachment protein OS=Mus musculus OX=10090 GN=Napg PE=1 SV=1	1	10	10	10	6	4	10	7	6	4	10	7	6	4	10	7	33.7	33.7	33.7	34.732	312	312	2.57		21	24	1	0	124.03	19.9	13.1	33.7	22.8	1717000000	257160000	106010000	893990000	459860000	268250000	148140000	307620000
protein_2016	Q9CXW4	Q9CXW4	4	4	4	60S ribosomal protein L11	Rpl11	sp|Q9CXW4|RL11_MOUSE 60S ribosomal protein L11 OS=Mus musculus OX=10090 GN=Rpl11 PE=1 SV=4	1	4	4	4	2	4	2	2	2	4	2	2	2	4	2	2	24.2	24.2	24.2	20.252	178	178	3.58			8	11	0	29.035	12.9	24.2	12.9	9.6	752240000	215090000	399410000	92054000	45698000	237390000	204770000	247930000
protein_2023	Q9CY64	Q9CY64	7	7	7	Biliverdin reductase A	Blvra	sp|Q9CY64|BIEA_MOUSE Biliverdin reductase A OS=Mus musculus OX=10090 GN=Blvra PE=1 SV=1	1	7	7	7	2	6	3	2	2	6	3	2	2	6	3	2	29.8	29.8	29.8	33.524	295	295	3			13		0	44.193	8.1	25.4	16.9	6.4	189960000	21163000	120430000	33642000	14723000	45527000	98697000	53337000
protein_2029	Q9CYT6	Q9CYT6	16	16	15	Adenylyl cyclase-associated protein 2	Cap2	sp|Q9CYT6|CAP2_MOUSE Adenylyl cyclase-associated protein 2 OS=Mus musculus OX=10090 GN=Cap2 PE=1 SV=1	1	16	16	15	2	3	13	14	2	3	13	14	2	3	12	13	42.2	42.2	40.5	52.861	476	476	2.08	1	34	2	1	0	118.01	5	6.3	28.4	38	2096900000	44982000	30633000	969480000	1051800000	37328000	114660000	255650000
protein_2033	Q9CZ13	Q9CZ13	13	13	12	Cytochrome b-c1 complex subunit 1, mitochondrial	Uqcrc1	sp|Q9CZ13|QCR1_MOUSE Cytochrome b-c1 complex subunit 1, mitochondrial OS=Mus musculus OX=10090 GN=Uqcrc1 PE=1 SV=2	1	13	13	12	6	5	12	12	6	5	12	12	6	5	11	12	30.6	30.6	29.2	52.851	480	480	2.31	7	39	16	6	0	318.21	13.3	13.3	26.7	29.2	4652000000	678040000	338040000	1568400000	2067500000	580950000	415050000	358810000
protein_2034	Q9CZ30	Q9CZ30	9	9	9	Obg-like ATPase 1	Ola1	sp|Q9CZ30|OLA1_MOUSE Obg-like ATPase 1 OS=Mus musculus OX=10090 GN=Ola1 PE=1 SV=1	1	9	9	9	1	1	6	7	1	1	6	7	1	1	6	7	27	27	27	44.729	396	396	2.26		15	3	1	0	55.681	2.8	3.3	19.4	21.2	526140000	34548000	12821000	218030000	260740000	0	0	79128000
protein_2035	Q9CZ42	Q9CZ42	5	5	5	ATP-dependent (S)-NAD(P)H-hydrate dehydratase	Carkd	sp|Q9CZ42|NNRD_MOUSE ATP-dependent (S)-NAD(P)H-hydrate dehydratase OS=Mus musculus OX=10090 GN=Naxd PE=1 SV=1	1	5	5	5	2	3	4	4	2	3	4	4	2	3	4	4	16	16	16	36.717	343	343	3			13		0	35.476	7	9.6	13.4	13.4	183270000	16582000	39697000	77485000	49504000	55701000	75942000	78077000
protein_2036	Q9CZ44	Q9CZ44	10	10	10	NSFL1 cofactor p47	Nsfl1c	sp|Q9CZ44|NSF1C_MOUSE NSFL1 cofactor p47 OS=Mus musculus OX=10090 GN=Nsfl1c PE=1 SV=1	1	10	10	10	1	2	6	8	1	2	6	8	1	2	6	8	33.2	33.2	33.2	40.709	370	370	2.17		15	3		0	71.668	3	7.6	15.7	26.2	314080000	12507000	9694900	132460000	159420000	0	0	44212000
protein_2038	Q9CZC8	Q9CZC8	7	7	7	Secernin-1	Scrn1	sp|Q9CZC8|SCRN1_MOUSE Secernin-1 OS=Mus musculus OX=10090 GN=Scrn1 PE=1 SV=1	1	7	7	7	1	1	5	6	1	1	5	6	1	1	5	6	21	21	21	46.325	414	414	2.2		12	3		0	103.14	3.9	2.2	15.9	18.4	815100000	9234300	8561200	384270000	413030000	0	0	197280000
protein_2042	Q9CZP5	Q9CZP5	2	2	2	Mitochondrial chaperone BCS1	Bcs1l	sp|Q9CZP5|BCS1_MOUSE Mitochondrial chaperone BCS1 OS=Mus musculus OX=10090 GN=Bcs1l PE=1 SV=1	1	2	2	2	0	0	2	2	0	0	2	2	0	0	2	2	7.7	7.7	7.7	47.406	418	418	2		4			0.0010526	12.372	0	0	7.7	7.7	38661000	0	0	18763000	19897000	0	0	13379000
protein_2043	Q9CZR3	Q9CZR3	2	2	2	Mitochondrial import receptor subunit TOM40B	Tomm40l	sp|Q9CZR3|TM40L_MOUSE Mitochondrial import receptor subunit TOM40B OS=Mus musculus OX=10090 GN=Tomm40l PE=1 SV=1	1	2	2	2	2	2	2	2	2	2	2	2	2	2	2	2	8.1	8.1	8.1	34.004	308	308	3			8		0.0011223	13.595	8.1	8.1	8.1	8.1	70897000	9959400	23008000	21104000	16826000	20698000	29827000	31309000
protein_2046	Q9CZU6	Q9CZU6	16	16	16	Citrate synthase, mitochondrial	Cs	sp|Q9CZU6|CISY_MOUSE Citrate synthase, mitochondrial OS=Mus musculus OX=10090 GN=Cs PE=1 SV=1	1	16	16	16	11	9	10	15	11	9	10	15	11	9	10	15	39.4	39.4	39.4	51.736	464	464	2.67	6	42	30	21	0	189.46	22	19	24.1	37.5	9743100000	2077200000	1024500000	3155800000	3485800000	1180500000	806120000	760880000
protein_2047	Q9CZW5	Q9CZW5	11	11	11	Mitochondrial import receptor subunit TOM70	Tomm70a	sp|Q9CZW5|TOM70_MOUSE Mitochondrial import receptor subunit TOM70 OS=Mus musculus OX=10090 GN=Tomm70 PE=1 SV=2	1	11	11	11	4	5	6	10	4	5	6	10	4	5	6	10	20.3	20.3	20.3	67.589	611	611	1.83	7	20	2		0	121.45	6.5	8.2	9.8	18.2	1000600000	68806000	119140000	329400000	483230000	166490000	61975000	150350000
protein_2048	Q9CZX8	Q9CZX8	6	6	6	40S ribosomal protein S19	Rps19	sp|Q9CZX8|RS19_MOUSE 40S ribosomal protein S19 OS=Mus musculus OX=10090 GN=Rps19 PE=1 SV=3	1	6	6	6	4	6	2	2	4	6	2	2	4	6	2	2	31	31	31	16.085	145	145	4				14	0	39.813	19.3	31	12.4	12.4	566580000	113780000	322850000	69947000	60012000	194140000	238950000	232750000
protein_2051	Q9D051	Q9D051	10	10	10	Pyruvate dehydrogenase E1 component subunit beta, mitochondrial	Pdhb	sp|Q9D051|ODPB_MOUSE Pyruvate dehydrogenase E1 component subunit beta, mitochondrial OS=Mus musculus OX=10090 GN=Pdhb PE=1 SV=1	1	10	10	10	6	10	10	8	6	10	10	8	6	10	10	8	37	37	37	38.937	359	359	2.87	2	5	53	1	0	155.17	20.6	37	37	29.5	6402700000	469550000	2607700000	2139400000	1186100000	403070000	1058900000	944300000
protein_2055	Q9D0E1	Q9D0E1	6	6	6	Heterogeneous nuclear ribonucleoprotein M	Hnrnpm	sp|Q9D0E1|HNRPM_MOUSE Heterogeneous nuclear ribonucleoprotein M OS=Mus musculus OX=10090 GN=Hnrnpm PE=1 SV=3	1	6	6	6	0	0	3	6	0	0	3	6	0	0	3	6	10.6	10.6	10.6	77.648	729	729	2		9			0	39.971	0	0	4.4	10.6	250450000	0	0	78181000	172260000	0	0	61378000
protein_2056	Q9D0F9	Q9D0F9	13	13	13	Phosphoglucomutase-1	Pgm1	sp|Q9D0F9|PGM1_MOUSE Phosphoglucomutase-1 OS=Mus musculus OX=10090 GN=Pgm1 PE=1 SV=4	1	13	13	13	5	3	7	11	5	3	7	11	5	3	7	11	25.4	25.4	25.4	61.417	562	562	2.4		19	10	1	0	133.72	8.7	5	13.3	21.2	624750000	72701000	16026000	273560000	262470000	107380000	26263000	99308000
protein_2058	Q9D0I9	Q9D0I9	5	5	5	Arginine--tRNA ligase, cytoplasmic	Rars	sp|Q9D0I9|SYRC_MOUSE Arginine--tRNA ligase, cytoplasmic OS=Mus musculus OX=10090 GN=Rars1 PE=1 SV=2	1	5	5	5	0	0	3	4	0	0	3	4	0	0	3	4	9.5	9.5	9.5	75.673	660	660	2		7			0	28.634	0	0	5.2	8	115800000	0	0	39184000	76613000	0	0	30791000
protein_2064	Q9D0M3	Q9D0M3	6	6	6	Cytochrome c1, heme protein, mitochondrial	Cyc1	sp|Q9D0M3|CY1_MOUSE Cytochrome c1, heme protein, mitochondrial OS=Mus musculus OX=10090 GN=Cyc1 PE=1 SV=1	1	6	6	6	4	6	5	4	4	6	5	4	4	6	5	4	15.1	15.1	15.1	35.327	325	325	2.84	3	4	26	4	0	323.31	11.1	15.1	11.1	10.8	3733900000	849780000	1554000000	735060000	595070000	1162100000	1366500000	911810000
protein_2065	Q9D0M5	Q9D0M5	4	4	2	Dynein light chain 2, cytoplasmic	Dynll2	sp|Q9D0M5|DYL2_MOUSE Dynein light chain 2, cytoplasmic OS=Mus musculus OX=10090 GN=Dynll2 PE=1 SV=1	1	4	4	2	3	4	1	1	3	4	1	1	1	2	0	0	38.2	38.2	13.5	10.35	89	89	4				10	0	34.782	32.6	38.2	12.4	12.4	1135000000	415210000	566180000	107090000	46507000	635920000	588480000	0
protein_2069	Q9D172	Q9D172	7	7	7	ES1 protein homolog, mitochondrial	D10Jhu81e	sp|Q9D172|GAL3A_MOUSE Glutamine amidotransferase-like class 1 domain-containing protein 3, mitochondrial OS=Mus musculus OX=10090 GN=Gatd3 PE=1 SV=1	1	7	7	7	5	7	5	5	5	7	5	5	5	7	5	5	37.2	37.2	37.2	28.09	266	266	3.08			22	2	0	140.59	25.9	37.2	25.9	24.8	2844400000	939800000	1005700000	684750000	214060000	860550000	929880000	826920000
protein_2070	Q9D1A2	Q9D1A2	5	5	5	Cytosolic non-specific dipeptidase	Cndp2	sp|Q9D1A2|CNDP2_MOUSE Cytosolic non-specific dipeptidase OS=Mus musculus OX=10090 GN=Cndp2 PE=1 SV=1	1	5	5	5	1	1	2	5	1	1	2	5	1	1	2	5	11.4	11.4	11.4	52.767	475	475	2.22		8		1	0	31.784	2.5	2.1	4.4	11.4	238490000	10015000	5598900	73641000	149240000	0	0	61872000
protein_2073	Q9D1G1	Q9D1G1	8	8	4	Ras-related protein Rab-1B	Rab1b	sp|Q9D1G1|RAB1B_MOUSE Ras-related protein Rab-1B OS=Mus musculus OX=10090 GN=Rab1b PE=1 SV=1	1	8	8	4	4	7	7	5	4	7	7	5	1	3	3	2	53.7	53.7	30.8	22.187	201	201	2.89	6	1	30	8	0	137.31	26.4	48.8	45.8	34.3	4779100000	846650000	2223700000	1033900000	674750000	1405400000	2547000000	1338200000
protein_2074	Q9D1G5	Q9D1G5	6	6	6	Leucine-rich repeat-containing protein 57	Lrrc57	sp|Q9D1G5|LRC57_MOUSE Leucine-rich repeat-containing protein 57 OS=Mus musculus OX=10090 GN=Lrrc57 PE=1 SV=1	1	6	6	6	4	5	4	2	4	5	4	2	4	5	4	2	23.8	23.8	23.8	26.76	239	239	3			15		0	41.8	18.4	18.4	18.4	8.4	389010000	82796000	159020000	117490000	29695000	125550000	125010000	84746000
protein_2080	Q9D1K2	Q9D1K2	6	6	6	V-type proton ATPase subunit F	Atp6v1f	sp|Q9D1K2|VATF_MOUSE V-type proton ATPase subunit F OS=Mus musculus OX=10090 GN=Atp6v1f PE=1 SV=2	1	6	6	6	4	6	2	3	4	6	2	3	4	6	2	3	42.9	42.9	42.9	13.37	119	119	4				18	0	64.406	36.1	42.9	19.3	26.1	884350000	378240000	370850000	85061000	50193000	428240000	182190000	290340000
protein_2086	Q9D1T0	Q9D1T0	5	5	4	Leucine-rich repeat and immunoglobulin-like domain-containing nogo receptor-interacting protein 1	Lingo1	sp|Q9D1T0|LIGO1_MOUSE Leucine-rich repeat and immunoglobulin-like domain-containing nogo receptor-interacting protein 1 OS=Mus musculus OX=10090 GN=Lingo1 PE=1 SV=1	1	5	5	4	2	5	4	3	2	5	4	3	1	4	3	3	10.3	10.3	7.8	69.1	614	614	2.1	10	3	4	4	0	38.362	4.1	10.3	8.1	5.7	304630000	16953000	181920000	32140000	73613000	72429000	49046000	15486000
protein_2091	Q9D2G2	Q9D2G2	8	8	8	Dihydrolipoyllysine-residue succinyltransferase component of 2-oxoglutarate dehydrogenase complex, mitochondrial	Dlst	sp|Q9D2G2|ODO2_MOUSE Dihydrolipoyllysine-residue succinyltransferase component of 2-oxoglutarate dehydrogenase complex, mitochondrial OS=Mus musculus OX=10090 GN=Dlst PE=1 SV=1	1	8	8	8	4	5	7	8	4	5	7	8	4	5	7	8	21.4	21.4	21.4	48.994	454	454	2.29	2	31	9	3	0	200.56	11.5	13.7	17.8	21.4	2263100000	253080000	136020000	917130000	956840000	416150000	330430000	282680000
protein_2092	Q9D2M8;Q9CZY3	Q9D2M8;Q9CZY3	5;4	5;4	5;4	Ubiquitin-conjugating enzyme E2 variant 2;Ubiquitin-conjugating enzyme E2 variant 1	Ube2v2;Ube2v1	sp|Q9D2M8|UB2V2_MOUSE Ubiquitin-conjugating enzyme E2 variant 2 OS=Mus musculus OX=10090 GN=Ube2v2 PE=1 SV=4;sp|Q9CZY3|UB2V1_MOUSE Ubiquitin-conjugating enzyme E2 variant 1 OS=Mus musculus OX=10090 GN=Ube2v1 PE=1 SV=1	2	5	5	5	3	5	2	3	3	5	2	3	3	5	2	3	33.1	33.1	33.1	16.367	145	145;147	4				16	0	92.819	17.9	33.1	13.1	17.9	1537700000	371890000	787470000	175230000	203100000	753500000	670590000	697210000
protein_2097	Q9D358	Q9D358	2	2	2	Low molecular weight phosphotyrosine protein phosphatase	Acp1	sp|Q9D358|PPAC_MOUSE Low molecular weight phosphotyrosine protein phosphatase OS=Mus musculus OX=10090 GN=Acp1 PE=1 SV=3	1	2	2	2	2	2	2	2	2	2	2	2	2	2	2	2	12.7	12.7	12.7	18.192	158	158	4				8	0	42.93	12.7	12.7	12.7	12.7	417170000	97658000	204660000	58282000	56572000	168510000	194810000	159840000
protein_2101	Q9D3D9	Q9D3D9	3	3	3	ATP synthase subunit delta, mitochondrial	Atp5d	sp|Q9D3D9|ATPD_MOUSE ATP synthase subunit delta, mitochondrial OS=Mus musculus OX=10090 GN=Atp5f1d PE=1 SV=1	1	3	3	3	3	3	2	2	3	3	2	2	3	3	2	2	22.6	22.6	22.6	17.6	168	168	4				13	0	227.37	22.6	22.6	13.7	13.7	2393600000	353100000	1174300000	594250000	271940000	725940000	1383800000	1902300000
protein_2103	Q9D415	Q9D415	4	4	4	Disks large-associated protein 1	Dlgap1	sp|Q9D415|DLGP1_MOUSE Disks large-associated protein 1 OS=Mus musculus OX=10090 GN=Dlgap1 PE=1 SV=3	1	4	4	4	0	3	2	2	0	3	2	2	0	3	2	2	4.6	4.6	4.6	110.37	992	992	1	7				0.00080192	25.996	0	3.7	2.4	2.4	86690000	0	46316000	14490000	25884000	0	0	20861000
protein_2112	Q9D6F9	Q9D6F9	25	7	7	Tubulin beta-4A chain	Tubb4a	sp|Q9D6F9|TBB4A_MOUSE Tubulin beta-4A chain OS=Mus musculus OX=10090 GN=Tubb4a PE=1 SV=3	1	25	7	7	20	20	22	23	5	5	7	5	5	5	7	5	61.9	17.1	17.1	49.585	444	444	2.49	6	32	16	11	0	323.31	52.7	56.8	57.9	60.8	14165000000	1320000000	1359100000	4409100000	7077000000	1075400000	1767500000	2024100000
protein_2114	Q9D6J6	Q9D6J6	6	6	6	NADH dehydrogenase [ubiquinone] flavoprotein 2, mitochondrial	Ndufv2	sp|Q9D6J6|NDUV2_MOUSE NADH dehydrogenase [ubiquinone] flavoprotein 2, mitochondrial OS=Mus musculus OX=10090 GN=Ndufv2 PE=1 SV=2	1	6	6	6	5	6	5	4	5	6	5	4	5	6	5	4	30.2	30.2	30.2	27.285	248	248	3.1			26	3	0	323.31	25	30.2	26.2	21	1739100000	396160000	787880000	300350000	254750000	610070000	631720000	332620000
protein_2117	Q9D6M3	Q9D6M3	8	8	5	Mitochondrial glutamate carrier 1	Slc25a22	sp|Q9D6M3|GHC1_MOUSE Mitochondrial glutamate carrier 1 OS=Mus musculus OX=10090 GN=Slc25a22 PE=1 SV=1	1	8	8	5	7	7	7	7	7	7	7	7	4	4	4	4	22	22	13	34.67	323	323	2.66	11	1	28	7	0	323.31	19.8	19.2	19.8	19.8	4159600000	739840000	1404700000	1391100000	623940000	740880000	1140300000	975370000
protein_2118	Q9D6R2	Q9D6R2	10	10	10	Isocitrate dehydrogenase [NAD] subunit alpha, mitochondrial	Idh3a	sp|Q9D6R2|IDH3A_MOUSE Isocitrate dehydrogenase [NAD] subunit alpha, mitochondrial OS=Mus musculus OX=10090 GN=Idh3a PE=1 SV=1	1	10	10	10	7	6	10	8	7	6	10	8	7	6	10	8	31.7	31.7	31.7	39.638	366	366	2.55	4	32	36	5	0	323.31	20.5	17.8	31.7	20.8	8253200000	1764700000	848980000	3626900000	2012500000	1531400000	824180000	1586000000
protein_2120	Q9D6U8	Q9D6U8	3	3	3	Protein FAM162A	Fam162a	sp|Q9D6U8|F162A_MOUSE Protein FAM162A OS=Mus musculus OX=10090 GN=Fam162a PE=1 SV=1	1	3	3	3	1	3	1	1	1	3	1	1	1	3	1	1	16.1	16.1	16.1	17.725	155	155	4				9	0.00073638	23.578	8.4	16.1	7.7	7.7	211880000	113900000	82365000	8815600	6805600	243760000	35867000	0
protein_2125	Q9D7G0	Q9D7G0	5	5	2	Ribose-phosphate pyrophosphokinase 1	Prps1	sp|Q9D7G0|PRPS1_MOUSE Ribose-phosphate pyrophosphokinase 1 OS=Mus musculus OX=10090 GN=Prps1 PE=1 SV=4	1	5	5	2	2	3	5	2	2	3	5	2	1	1	2	1	17.3	17.3	7.2	34.834	318	318	3		1	12	1	0	71.046	9.4	11	17.3	9.4	666860000	102440000	120870000	368190000	75364000	147000000	209240000	504520000
protein_2126	Q9D7H3	Q9D7H3	2	2	2	RNA 3-terminal phosphate cyclase	RtcA	sp|Q9D7H3|RTCA_MOUSE RNA 3-terminal phosphate cyclase OS=Mus musculus OX=10090 GN=RtcA PE=1 SV=2	1	2	2	2	1	0	2	2	1	0	2	2	1	0	2	2	6.3	6.3	6.3	39.254	366	366	2.2		4	1		0.0010627	12.444	2.7	0	6.3	6.3	31837000	5593800	0	11350000	14893000	0	0	8217300
protein_2134	Q9D855	Q9D855	8	8	8	Cytochrome b-c1 complex subunit 7	Uqcrb	sp|Q9D855|QCR7_MOUSE Cytochrome b-c1 complex subunit 7 OS=Mus musculus OX=10090 GN=Uqcrb PE=1 SV=3	1	8	8	8	7	7	4	4	7	7	4	4	7	7	4	4	50.5	50.5	50.5	13.527	111	111	4				28	0	185.86	49.5	46.8	39.6	40.5	2143100000	796040000	736640000	364690000	245720000	976220000	775790000	917790000
protein_2137	Q9D898	Q9D898	3	3	3	Actin-related protein 2/3 complex subunit 5-like protein	Arpc5l	sp|Q9D898|ARP5L_MOUSE Actin-related protein 2/3 complex subunit 5-like protein OS=Mus musculus OX=10090 GN=Arpc5l PE=1 SV=1	1	3	3	3	3	3	2	2	3	3	2	2	3	3	2	2	28.8	28.8	28.8	16.98	153	153	3.73			4	11	0	118.64	28.8	28.8	16.3	16.3	1101400000	376990000	534130000	115950000	74305000	400490000	449390000	381280000
protein_2140	Q9D8N0	Q9D8N0	11	11	11	Elongation factor 1-gamma	Eef1g	sp|Q9D8N0|EF1G_MOUSE Elongation factor 1-gamma OS=Mus musculus OX=10090 GN=Eef1g PE=1 SV=3	1	11	11	11	3	2	7	10	3	2	7	10	3	2	7	10	23.8	23.8	23.8	50.06	437	437	2.17	1	23	4	1	0	94.26	7.6	6.2	16.5	21.5	1099700000	86922000	24450000	432770000	555520000	88038000	56489000	266830000
protein_2142	Q9D8U8	Q9D8U8	4	4	4	Sorting nexin-5	Snx5	sp|Q9D8U8|SNX5_MOUSE Sorting nexin-5 OS=Mus musculus OX=10090 GN=Snx5 PE=1 SV=1	1	4	4	4	0	0	3	3	0	0	3	3	0	0	3	3	10.1	10.1	10.1	46.797	404	404	2		6			0.00076687	24.698	0	0	7.7	7.9	75780000	0	0	38155000	37625000	0	0	21379000
protein_2145	Q9D8Y0;Q9D4J1	Q9D8Y0	12;2	12;2	12;2	EF-hand domain-containing protein D2	Efhd2	sp|Q9D8Y0|EFHD2_MOUSE EF-hand domain-containing protein D2 OS=Mus musculus OX=10090 GN=Efhd2 PE=1 SV=1	2	12	12	12	8	10	8	8	8	10	8	8	8	10	8	8	44.6	44.6	44.6	26.791	240	240;240	3.16		1	36	8	0	323.31	32.1	39.2	37.1	34.6	3981200000	636420000	1484300000	1334100000	526340000	538970000	876590000	874550000
protein_2151	Q9DB05	Q9DB05	12	9	9	Alpha-soluble NSF attachment protein	Napa	sp|Q9DB05|SNAA_MOUSE Alpha-soluble NSF attachment protein OS=Mus musculus OX=10090 GN=Napa PE=1 SV=1	1	12	9	9	8	10	10	10	6	7	7	8	6	7	7	8	54.9	43.4	43.4	33.189	295	295	3			33		0	111.48	34.2	42.7	42.4	47.1	1782300000	177300000	773570000	489890000	341530000	285590000	388950000	241680000
protein_2153	Q9DB20	Q9DB20	9	9	9	ATP synthase subunit O, mitochondrial	Atp5o	sp|Q9DB20|ATPO_MOUSE ATP synthase subunit O, mitochondrial OS=Mus musculus OX=10090 GN=Atp5po PE=1 SV=1	1	9	9	9	8	8	6	4	8	8	6	4	8	8	6	4	49.3	49.3	49.3	23.363	213	213	3.23	2	1	33	17	0	323.31	48.4	45.1	36.2	21.6	10436000000	3198100000	4312300000	1712800000	1213000000	2184500000	2052300000	954860000
protein_2160	Q9DB77	Q9DB77	17	17	17	Cytochrome b-c1 complex subunit 2, mitochondrial	Uqcrc2	sp|Q9DB77|QCR2_MOUSE Cytochrome b-c1 complex subunit 2, mitochondrial OS=Mus musculus OX=10090 GN=Uqcrc2 PE=1 SV=1	1	17	17	17	9	5	16	15	9	5	16	15	9	5	16	15	44.8	44.8	44.8	48.234	453	453	2.3		56	17	3	0	323.31	22.5	14.3	44.8	39.1	8481700000	962610000	130230000	3939100000	3449700000	555450000	300950000	805880000
protein_2161	Q9DBC7	Q9DBC7	4	4	3	cAMP-dependent protein kinase type I-alpha regulatory subunit;cAMP-dependent protein kinase type I-alpha regulatory subunit, N-terminally processed	Prkar1a	sp|Q9DBC7|KAP0_MOUSE cAMP-dependent protein kinase type I-alpha regulatory subunit OS=Mus musculus OX=10090 GN=Prkar1a PE=1 SV=3	1	4	4	3	0	0	3	4	0	0	3	4	0	0	2	3	11.5	11.5	8.4	43.185	381	381	2		7			0	35.403	0	0	9.4	11.5	160400000	0	0	74766000	85638000	0	0	55340000
protein_2163	Q9DBF1	Q9DBF1	7	7	7	Alpha-aminoadipic semialdehyde dehydrogenase	Aldh7a1	sp|Q9DBF1|AL7A1_MOUSE Alpha-aminoadipic semialdehyde dehydrogenase OS=Mus musculus OX=10090 GN=Aldh7a1 PE=1 SV=4	1	7	7	7	1	0	4	5	1	0	4	5	1	0	4	5	13.9	13.9	13.9	58.861	539	539	2.09		10	1		0	44.334	3.2	0	9.1	10.8	247040000	13720000	0	129120000	104200000	0	0	77972000
protein_2164	Q9DBG3	Q9DBG3	32	32	19	AP-2 complex subunit beta	Ap2b1	sp|Q9DBG3|AP2B1_MOUSE AP-2 complex subunit beta OS=Mus musculus OX=10090 GN=Ap2b1 PE=1 SV=1	1	32	32	19	18	28	24	30	18	28	24	30	11	15	13	17	37.9	37.9	24.4	104.58	937	937	1.68	115	48	33	8	0	323.31	22.1	34.2	30.5	36.4	13615000000	1501600000	4952300000	2694900000	4466300000	572500000	486450000	503210000
protein_2167	Q9DBJ1;O70250	Q9DBJ1	12;2	12;2	12;2	Phosphoglycerate mutase 1	Pgam1	sp|Q9DBJ1|PGAM1_MOUSE Phosphoglycerate mutase 1 OS=Mus musculus OX=10090 GN=Pgam1 PE=1 SV=3	2	12	12	12	10	11	9	9	10	11	9	9	10	11	9	9	55.9	55.9	55.9	28.832	254	254;253	3.04	2		63	7	0	323.31	41.7	55.5	41.3	41.3	19216000000	3461300000	6735200000	6826000000	2193100000	3251400000	4428000000	3907400000
protein_2168	Q9DBP5	Q9DBP5	5	5	5	UMP-CMP kinase	Cmpk1	sp|Q9DBP5|KCY_MOUSE UMP-CMP kinase OS=Mus musculus OX=10090 GN=Cmpk1 PE=1 SV=1	1	5	5	5	4	4	3	2	4	4	3	2	4	4	3	2	29.6	29.6	29.6	22.165	196	196	3.44			9	7	0	54.513	23	24	17.3	10.7	555250000	190120000	287380000	40637000	37117000	286710000	316630000	91379000
protein_2178	Q9DC61	Q9DC61	3	3	3	Mitochondrial-processing peptidase subunit alpha	Pmpca	sp|Q9DC61|MPPA_MOUSE Mitochondrial-processing peptidase subunit alpha OS=Mus musculus OX=10090 GN=Pmpca PE=1 SV=1	1	3	3	3	1	0	3	2	1	0	3	2	1	0	3	2	5.3	5.3	5.3	58.278	524	524	2.17		5	1		0.0013089	18.797	1.5	0	5.3	3.8	38376000	3405700	0	19014000	15957000	0	0	9684500
protein_2180	Q9DC69	Q9DC69	16	16	16	NADH dehydrogenase [ubiquinone] 1 alpha subcomplex subunit 9, mitochondrial	Ndufa9	sp|Q9DC69|NDUA9_MOUSE NADH dehydrogenase [ubiquinone] 1 alpha subcomplex subunit 9, mitochondrial OS=Mus musculus OX=10090 GN=Ndufa9 PE=1 SV=2	1	16	16	16	7	14	13	11	7	14	13	11	7	14	13	11	46.4	46.4	46.4	42.525	377	377	3	1	1	51	3	0	321.48	22.5	40.8	37.9	38.2	3347700000	252730000	1555400000	887510000	651980000	198810000	506350000	370120000
protein_2187	Q9DCJ5	Q9DCJ5	6	6	6	NADH dehydrogenase [ubiquinone] 1 alpha subcomplex subunit 8	Ndufa8	sp|Q9DCJ5|NDUA8_MOUSE NADH dehydrogenase [ubiquinone] 1 alpha subcomplex subunit 8 OS=Mus musculus OX=10090 GN=Ndufa8 PE=1 SV=3	1	6	6	6	3	5	4	4	3	5	4	4	3	5	4	4	36.6	36.6	36.6	19.992	172	172	3.86			3	18	0	86.96	25	35.5	29.1	29.1	2030500000	418590000	1060800000	307530000	243640000	462080000	749940000	497240000
protein_2191	Q9DCN2	Q9DCN2	9	9	9	NADH-cytochrome b5 reductase 3;NADH-cytochrome b5 reductase 3 membrane-bound form;NADH-cytochrome b5 reductase 3 soluble form	Cyb5r3	sp|Q9DCN2|NB5R3_MOUSE NADH-cytochrome b5 reductase 3 OS=Mus musculus OX=10090 GN=Cyb5r3 PE=1 SV=3	1	9	9	9	4	7	6	4	4	7	6	4	4	7	6	4	38.2	38.2	38.2	34.127	301	301	3.05			21	1	0	65.378	14.3	30.6	24.9	14.3	911710000	126510000	426130000	257900000	101170000	183050000	208710000	196430000
protein_2194	Q9DCS9	Q9DCS9	7	7	7	NADH dehydrogenase [ubiquinone] 1 beta subcomplex subunit 10	Ndufb10	sp|Q9DCS9|NDUBA_MOUSE NADH dehydrogenase [ubiquinone] 1 beta subcomplex subunit 10 OS=Mus musculus OX=10090 GN=Ndufb10 PE=1 SV=3	1	7	7	7	6	7	6	3	6	7	6	3	6	7	6	3	46	46	46	21.024	176	176	3			31		0	74.34	44.3	46	37.5	22.7	2145100000	412240000	973080000	591210000	168620000	415660000	523160000	457440000
protein_2196	Q9DCT2	Q9DCT2	9	9	9	NADH dehydrogenase [ubiquinone] iron-sulfur protein 3, mitochondrial	Ndufs3	sp|Q9DCT2|NDUS3_MOUSE NADH dehydrogenase [ubiquinone] iron-sulfur protein 3, mitochondrial OS=Mus musculus OX=10090 GN=Ndufs3 PE=1 SV=2	1	9	9	9	8	8	8	7	8	8	8	7	8	8	8	7	35	35	35	30.149	263	263	3.07			38	3	0	323.31	29.7	29.7	35	29.3	4409800000	1155200000	1484600000	1045300000	724670000	1040700000	939780000	770030000
protein_2199	Q9DCW4	Q9DCW4	11	11	11	Electron transfer flavoprotein subunit beta	Etfb	sp|Q9DCW4|ETFB_MOUSE Electron transfer flavoprotein subunit beta OS=Mus musculus OX=10090 GN=Etfb PE=1 SV=3	1	11	11	11	6	11	8	5	6	11	8	5	6	11	8	5	40	40	40	27.623	255	255	3			31		0	95.184	20.8	40	37.3	21.6	1175100000	123950000	532400000	384020000	134770000	261060000	259710000	234070000
protein_2200	Q9DCX2	Q9DCX2	14	14	14	ATP synthase subunit d, mitochondrial	Atp5h	sp|Q9DCX2|ATP5H_MOUSE ATP synthase subunit d, mitochondrial OS=Mus musculus OX=10090 GN=Atp5pd PE=1 SV=3	1	14	14	14	10	12	8	10	10	12	8	10	10	12	8	10	77	77	77	18.749	161	161	3.12			44	6	0	163.68	56.5	67.1	53.4	72.7	5949400000	1954900000	2526300000	828040000	640210000	1848900000	1692900000	579060000
protein_2201	Q9DCZ4	Q9DCZ4	4	4	4	Apolipoprotein O	Apoo	sp|Q9DCZ4|MIC26_MOUSE MICOS complex subunit Mic26 OS=Mus musculus OX=10090 GN=Apoo PE=1 SV=2	1	4	4	4	4	2	1	1	4	2	1	1	4	2	1	1	21.7	21.7	21.7	22.604	198	198	3.89			1	8	0	30.734	21.7	12.6	5.6	7.6	443460000	143000000	185280000	71893000	43290000	245980000	218650000	0
protein_2205	Q9EP89	Q9EP89	2	2	2	Serine beta-lactamase-like protein LACTB, mitochondrial	Lactb	sp|Q9EP89|LACTB_MOUSE Serine beta-lactamase-like protein LACTB, mitochondrial OS=Mus musculus OX=10090 GN=Lactb PE=1 SV=1	1	2	2	2	0	0	2	2	0	0	2	2	0	0	2	2	3.4	3.4	3.4	60.705	551	551	2		4			0.0010283	12.074	0	0	3.4	3.4	48782000	0	0	22926000	25856000	0	0	16026000
protein_2213	Q9EPU0	Q9EPU0	10	10	10	Regulator of nonsense transcripts 1	Upf1	sp|Q9EPU0|RENT1_MOUSE Regulator of nonsense transcripts 1 OS=Mus musculus OX=10090 GN=Upf1 PE=1 SV=2	1	10	10	10	0	8	2	4	0	8	2	4	0	8	2	4	10.1	10.1	10.1	123.97	1124	1124	1	14				0	64.955	0	7.9	2.2	4.4	144270000	0	85806000	17468000	40991000	0	0	34440000
protein_2216	Q9EQ20	Q9EQ20	11	11	11	Methylmalonate-semialdehyde dehydrogenase [acylating], mitochondrial	Aldh6a1	sp|Q9EQ20|MMSA_MOUSE Methylmalonate-semialdehyde dehydrogenase [acylating], mitochondrial OS=Mus musculus OX=10090 GN=Aldh6a1 PE=1 SV=1	1	11	11	11	1	0	4	11	1	0	4	11	1	0	4	11	25.2	25.2	25.2	57.915	535	535	2.06		15	1		0	78.195	2.1	0	8.4	25.2	455270000	20603000	0	129880000	304790000	0	0	54485000
protein_2217	Q9EQF6	Q9EQF6	9	9	9	Dihydropyrimidinase-related protein 5	Dpysl5	sp|Q9EQF6|DPYL5_MOUSE Dihydropyrimidinase-related protein 5 OS=Mus musculus OX=10090 GN=Dpysl5 PE=1 SV=1	1	9	9	9	0	0	5	8	0	0	5	8	0	0	5	8	19	19	19	61.516	564	564	2		13			0	59.66	0	0	13.5	17	431020000	0	0	243930000	187090000	0	0	211720000
protein_2218	Q9EQH3	Q9EQH3	16	16	16	Vacuolar protein sorting-associated protein 35	Vps35	sp|Q9EQH3|VPS35_MOUSE Vacuolar protein sorting-associated protein 35 OS=Mus musculus OX=10090 GN=Vps35 PE=1 SV=1	1	16	16	16	5	13	9	9	5	13	9	9	5	13	9	9	24.6	24.6	24.6	91.712	796	796	1.83	26	19	12	2	0	128.65	6.8	19.5	13.3	13.8	1950600000	146600000	818050000	447520000	538440000	137600000	122440000	107540000
protein_2225	Q9ERD7	Q9ERD7	22	9	7	Tubulin beta-3 chain	Tubb3	sp|Q9ERD7|TBB3_MOUSE Tubulin beta-3 chain OS=Mus musculus OX=10090 GN=Tubb3 PE=1 SV=1	1	22	9	7	18	17	21	21	6	5	9	8	4	3	7	6	58.2	32.4	27.3	50.418	450	450	2.41	6	38	25	6	0	323.31	45.3	40.2	56.2	57.3	16729000000	1656800000	1300800000	5660600000	8111200000	1304600000	1695500000	1438500000
protein_2231	Q9ERS2	Q9ERS2	7	7	7	NADH dehydrogenase [ubiquinone] 1 alpha subcomplex subunit 13	Ndufa13	sp|Q9ERS2|NDUAD_MOUSE NADH dehydrogenase [ubiquinone] 1 alpha subcomplex subunit 13 OS=Mus musculus OX=10090 GN=Ndufa13 PE=1 SV=3	1	7	7	7	5	7	4	4	5	7	4	4	5	7	4	4	39.6	39.6	39.6	16.859	144	144	4				27	0	75.237	29.2	39.6	22.2	28.5	2100800000	619390000	1057800000	196060000	227550000	961750000	900340000	480160000
protein_2235	Q9ES97	Q9ES97	13	13	13	Reticulon-3	Rtn3	sp|Q9ES97|RTN3_MOUSE Reticulon-3 OS=Mus musculus OX=10090 GN=Rtn3 PE=1 SV=2	1	13	13	13	3	11	8	10	3	11	8	10	3	11	8	10	14.2	14.2	14.2	103.88	964	964	1.8	25	9	15		0	95.288	2.6	11.7	9.1	11.6	3508600000	261590000	1630700000	777520000	838790000	766480000	1703400000	947260000
protein_2238	Q9ESN4;Q8CFR0	Q9ESN4;Q8CFR0	2;1	2;1	2;1	Complement C1q-like protein 3;Complement C1q-like protein 2	C1ql3;C1ql2	sp|Q9ESN4|C1QL3_MOUSE Complement C1q-like protein 3 OS=Mus musculus OX=10090 GN=C1ql3 PE=1 SV=1;sp|Q8CFR0|C1QL2_MOUSE Complement C1q-like protein 2 OS=Mus musculus OX=10090 GN=C1ql2 PE=1 SV=1	2	2	2	2	2	2	1	0	2	2	1	0	2	2	1	0	10.2	10.2	10.2	26.687	255	255;287	3			5		0.0010488	12.324	10.2	10.2	7.1	0	52728000	14353000	24043000	14332000	0	40640000	38314000	0
protein_2247	Q9JHU4	Q9JHU4	120	120	120	Cytoplasmic dynein 1 heavy chain 1	Dync1h1	sp|Q9JHU4|DYHC1_MOUSE Cytoplasmic dynein 1 heavy chain 1 OS=Mus musculus OX=10090 GN=Dync1h1 PE=1 SV=2	1	120	120	120	16	110	42	80	16	110	42	80	16	110	42	80	27.7	27.7	27.7	532.04	4644	4644	1.23	243	38	12	2	0	323.31	3.7	25.7	9.9	18.2	8572000000	193070000	4999400000	958180000	2421300000	39734000	217490000	124290000
protein_2253	Q9JIA1	Q9JIA1	13	13	13	Leucine-rich glioma-inactivated protein 1	Lgi1	sp|Q9JIA1|LGI1_MOUSE Leucine-rich glioma-inactivated protein 1 OS=Mus musculus OX=10090 GN=Lgi1 PE=1 SV=1	1	13	13	13	3	2	9	11	3	2	9	11	3	2	9	11	26.6	26.6	26.6	63.643	557	557	2.03	6	24	5	1	0	167.91	5.2	3.8	18.5	23.2	1141200000	59255000	52602000	404850000	624530000	78838000	61633000	160330000
protein_2258	Q9JII6	Q9JII6	11	11	11	Alcohol dehydrogenase [NADP(+)]	Akr1a1	sp|Q9JII6|AK1A1_MOUSE Aldo-keto reductase family 1 member A1 OS=Mus musculus OX=10090 GN=Akr1a1 PE=1 SV=3	1	11	11	11	4	4	7	7	4	4	7	7	4	4	7	7	36	36	36	36.586	325	325	2.73		9	20	1	0	90.471	12	14.5	24	20	642860000	48573000	71499000	299380000	223410000	102810000	79507000	200260000
protein_2260	Q9JIS5	Q9JIS5	11	11	11	Synaptic vesicle glycoprotein 2A	Sv2a	sp|Q9JIS5|SV2A_MOUSE Synaptic vesicle glycoprotein 2A OS=Mus musculus OX=10090 GN=Sv2a PE=1 SV=1	1	11	11	11	6	11	9	9	6	11	9	9	6	11	9	9	15.5	15.5	15.5	82.646	742	742	1.18	40	9			0	223.34	8.2	15.5	11.6	11.9	2815500000	157980000	1115900000	585340000	956300000	379980000	257950000	189370000
protein_2265	Q9JJI8	Q9JJI8	3	3	3	60S ribosomal protein L38	Rpl38	sp|Q9JJI8|RL38_MOUSE 60S ribosomal protein L38 OS=Mus musculus OX=10090 GN=Rpl38 PE=1 SV=3	1	3	3	3	3	2	0	0	3	2	0	0	3	2	0	0	50	50	50	8.2038	70	70	4				6	0.0013889	20.482	50	32.9	0	0	120860000	57439000	63419000	0	0	133480000	82245000	0
protein_2266	Q9JJK2	Q9JJK2	6	6	6	LanC-like protein 2	Lancl2	sp|Q9JJK2|LANC2_MOUSE LanC-like protein 2 OS=Mus musculus OX=10090 GN=Lancl2 PE=1 SV=1	1	6	6	6	1	1	5	5	1	1	5	5	1	1	5	5	12.7	12.7	12.7	50.777	450	450	2.15		11	2		0	43.473	2.4	2.4	9.8	12.4	482080000	50702000	13527000	188720000	229120000	0	0	91348000
protein_2268	Q9JJV2	Q9JJV2	4	4	4	Profilin-2	Pfn2	sp|Q9JJV2|PROF2_MOUSE Profilin-2 OS=Mus musculus OX=10090 GN=Pfn2 PE=1 SV=3	1	4	4	4	4	4	3	4	4	4	3	4	4	4	3	4	26.4	26.4	26.4	15.032	140	140	4				20	0	67.503	26.4	26.4	25	26.4	3317800000	749540000	1737500000	358880000	471840000	1727600000	1673200000	1214600000
protein_2270	Q9JJZ2	Q9JJZ2	18	3	3	Tubulin alpha-8 chain	Tuba8	sp|Q9JJZ2|TBA8_MOUSE Tubulin alpha-8 chain OS=Mus musculus OX=10090 GN=Tuba8 PE=1 SV=1	1	18	3	3	13	12	14	17	1	0	2	3	1	0	2	3	41.6	7.8	7.8	50.051	449	449	2.43		5	1	1	0.0014025	21.064	29.2	30.5	34.7	41.4	105680000	4145700	0	28526000	73013000	0	0	16830000
protein_2272	Q9JK48	Q9JK48	3	2	2	Endophilin-B1	Sh3glb1	sp|Q9JK48|SHLB1_MOUSE Endophilin-B1 OS=Mus musculus OX=10090 GN=Sh3glb1 PE=1 SV=1	1	3	2	2	0	0	2	3	0	0	2	2	0	0	2	2	10.4	8.2	8.2	40.855	365	365	2		4			0.0010911	12.972	0	0	8.2	10.4	43638000	0	0	21997000	21641000	0	0	20554000
protein_2273	Q9JKB1;P58321	Q9JKB1;P58321	4;3	4;3	4;3	Ubiquitin carboxyl-terminal hydrolase isozyme L3;Ubiquitin carboxyl-terminal hydrolase isozyme L4	Uchl3;Uchl4	sp|Q9JKB1|UCHL3_MOUSE Ubiquitin carboxyl-terminal hydrolase isozyme L3 OS=Mus musculus OX=10090 GN=Uchl3 PE=1 SV=2;sp|P58321|UCHL4_MOUSE Ubiquitin carboxyl-terminal hydrolase isozyme L4 OS=Mus musculus OX=10090 GN=Uchl4 PE=2 SV=1	2	4	4	4	2	3	1	2	2	3	1	2	2	3	1	2	20.9	20.9	20.9	26.151	230	230;233	3			8		0.00079681	25.838	7.8	12.2	3.9	12.6	177710000	34609000	65110000	30955000	47041000	119270000	106010000	0
protein_2275	Q9JKD3	Q9JKD3	2	2	2	Secretory carrier-associated membrane protein 5	Scamp5	sp|Q9JKD3|SCAM5_MOUSE Secretory carrier-associated membrane protein 5 OS=Mus musculus OX=10090 GN=Scamp5 PE=1 SV=1	1	2	2	2	2	2	2	2	2	2	2	2	2	2	2	2	8.5	8.5	8.5	26.068	235	235	1.93	8	1	5	1	0.0012579	17.995	8.5	8.5	8.5	8.5	398070000	45833000	185260000	70140000	96842000	178840000	194250000	75706000
protein_2287	Q9JLM8;O88809	Q9JLM8	16;1	16;1	16;1	Serine/threonine-protein kinase DCLK1	Dclk1	sp|Q9JLM8|DCLK1_MOUSE Serine/threonine-protein kinase DCLK1 OS=Mus musculus OX=10090 GN=Dclk1 PE=1 SV=1	2	16	16	16	4	14	7	9	4	14	7	9	4	14	7	9	25	25	25	84.152	756	756;366	1.65	30	10	10	1	0	157.42	4.4	22.4	12.6	12.6	1096000000	45646000	541040000	225020000	284320000	74873000	67252000	65026000
protein_2290	Q9JLZ3	Q9JLZ3	6	6	6	Methylglutaconyl-CoA hydratase, mitochondrial	Auh	sp|Q9JLZ3|AUHM_MOUSE Methylglutaconyl-CoA hydratase, mitochondrial OS=Mus musculus OX=10090 GN=Auh PE=1 SV=1	1	6	6	6	3	6	4	4	3	6	4	4	3	6	4	4	23.9	23.9	23.9	33.395	314	314	3.11			17	2	0	49.188	9.6	23.9	13.4	16.6	825120000	140790000	390750000	189470000	104100000	271860000	250210000	184590000
protein_2293	Q9JM76	Q9JM76	5	5	5	Actin-related protein 2/3 complex subunit 3	Arpc3	sp|Q9JM76|ARPC3_MOUSE Actin-related protein 2/3 complex subunit 3 OS=Mus musculus OX=10090 GN=Arpc3 PE=1 SV=3	1	5	5	5	5	5	4	4	5	5	4	4	5	5	4	4	30.9	30.9	30.9	20.524	178	178	3.62			12	20	0	88.351	30.9	30.9	23.6	23.6	1933600000	669500000	722500000	407830000	133730000	638600000	341540000	1094600000
protein_2298	Q9JMH6	Q9JMH6	4	4	4	Thioredoxin reductase 1, cytoplasmic	Txnrd1	sp|Q9JMH6|TRXR1_MOUSE Thioredoxin reductase 1, cytoplasmic OS=Mus musculus OX=10090 GN=Txnrd1 PE=1 SV=3	1	4	4	4	0	0	3	4	0	0	3	4	0	0	3	4	7.8	7.8	7.8	67.083	613	613	2		7			0.00082645	27.579	0	0	5.4	7.8	108260000	0	0	39633000	68631000	0	0	24207000
protein_2301	Q9QUM9	Q9QUM9	5	5	5	Proteasome subunit alpha type-6	Psma6	sp|Q9QUM9|PSA6_MOUSE Proteasome subunit alpha type-6 OS=Mus musculus OX=10090 GN=Psma6 PE=1 SV=1	1	5	5	5	3	4	4	2	3	4	4	2	3	4	4	2	25.2	25.2	25.2	27.372	246	246	3.12			14	2	0	35.982	12.6	17.9	20.3	7.7	845970000	152720000	386310000	255660000	51287000	238890000	332550000	255360000
protein_2302	Q9QUP5	Q9QUP5	4	4	4	Hyaluronan and proteoglycan link protein 1	Hapln1	sp|Q9QUP5|HPLN1_MOUSE Hyaluronan and proteoglycan link protein 1 OS=Mus musculus OX=10090 GN=Hapln1 PE=1 SV=1	1	4	4	4	0	0	4	4	0	0	4	4	0	0	4	4	10.7	10.7	10.7	40.477	356	356	2		10			0	55.897	0	0	10.7	10.7	309820000	0	0	179950000	129860000	0	0	78142000
protein_2304	Q9QUR7	Q9QUR7	4	4	4	Peptidyl-prolyl cis-trans isomerase NIMA-interacting 1	Pin1	sp|Q9QUR7|PIN1_MOUSE Peptidyl-prolyl cis-trans isomerase NIMA-interacting 1 OS=Mus musculus OX=10090 GN=Pin1 PE=1 SV=1	1	4	4	4	4	3	2	1	4	3	2	1	4	3	2	1	34.5	34.5	34.5	18.37	165	165	4				10	0	34.066	34.5	25.5	13.9	4.8	360330000	137170000	176620000	39957000	6590100	189970000	140640000	0
protein_2306	Q9QWI6	Q9QWI6	24	24	24	SRC kinase signaling inhibitor 1	Srcin1	sp|Q9QWI6|SRCN1_MOUSE SRC kinase signaling inhibitor 1 OS=Mus musculus OX=10090 GN=Srcin1 PE=1 SV=2	1	24	24	24	3	22	8	15	3	22	8	15	3	22	8	15	22.7	22.7	22.7	134.86	1250	1250	1.25	42	7	3		0	167.7	2.8	21.5	7.4	15	1360300000	50101000	731000000	126350000	452870000	77759000	112270000	55291000
protein_2307	Q9QWW1	Q9QWW1	3	2	2	Homer protein homolog 2	Homer2	sp|Q9QWW1|HOME2_MOUSE Homer protein homolog 2 OS=Mus musculus OX=10090 GN=Homer2 PE=1 SV=1	1	3	2	2	0	0	3	3	0	0	2	2	0	0	2	2	7.9	5.6	5.6	40.57	354	354	2		4			0.0010565	12.399	0	0	7.9	7.9	37405000	0	0	19924000	17481000	0	0	16749000
protein_2314	Q9QXS1	Q9QXS1	114	114	111	Plectin	Plec	sp|Q9QXS1|PLEC_MOUSE Plectin OS=Mus musculus OX=10090 GN=Plec PE=1 SV=3	1	114	114	111	16	93	42	75	16	93	42	75	16	90	41	73	26.1	26.1	24.7	534.18	4691	4691	1.2	212	20	13	1	0	323.31	3.9	22	9.7	17.4	4526200000	167210000	2414800000	537550000	1406600000	55186000	143110000	103320000
protein_2318	Q9QXY6	Q9QXY6	15	15	5	EH domain-containing protein 3	Ehd3	sp|Q9QXY6|EHD3_MOUSE EH domain-containing protein 3 OS=Mus musculus OX=10090 GN=Ehd3 PE=1 SV=2	1	15	15	5	4	3	7	15	4	3	7	15	1	0	3	5	23.4	23.4	8.6	60.82	535	535	2.16		27	3	1	0	107.47	7.9	6.7	10.7	23.4	874620000	48844000	16369000	243640000	565770000	90081000	53585000	80216000
protein_2320	Q9QY76	Q9QY76	7	6	6	Vesicle-associated membrane protein-associated protein B	Vapb	sp|Q9QY76|VAPB_MOUSE Vesicle-associated membrane protein-associated protein B OS=Mus musculus OX=10090 GN=Vapb PE=1 SV=3	1	7	6	6	4	5	5	5	3	4	4	4	3	4	4	4	28	28	28	26.946	243	243	3.06			15	1	0	53.086	16.9	22.6	21.4	16.9	866340000	189400000	310330000	208150000	158460000	318550000	398350000	227540000
protein_2321	Q9QYA2	Q9QYA2	3	3	3	Mitochondrial import receptor subunit TOM40 homolog	Tomm40	sp|Q9QYA2|TOM40_MOUSE Mitochondrial import receptor subunit TOM40 homolog OS=Mus musculus OX=10090 GN=Tomm40 PE=1 SV=3	1	3	3	3	0	0	3	2	0	0	3	2	0	0	3	2	11.1	11.1	11.1	37.895	361	361	2		5			0.0013831	20.386	0	0	11.1	6.9	78252000	0	0	42272000	35980000	0	0	23152000
protein_2324	Q9QYB8	Q9QYB8	14	13	13	Beta-adducin	Add2	sp|Q9QYB8|ADDB_MOUSE Beta-adducin OS=Mus musculus OX=10090 GN=Add2 PE=1 SV=4	1	14	13	13	2	12	6	10	2	11	5	9	2	11	5	9	21.8	20.7	20.7	80.641	725	725	1.24	27	4	2		0	109.25	2.6	18.6	8.8	17	1287600000	52824000	566790000	209580000	458400000	80029000	168110000	140370000
protein_2325	Q9QYC0	Q9QYC0	15	15	14	Alpha-adducin	Add1	sp|Q9QYC0|ADDA_MOUSE Alpha-adducin OS=Mus musculus OX=10090 GN=Add1 PE=1 SV=2	1	15	15	14	4	13	8	10	4	13	8	10	4	12	7	9	23.4	23.4	22.3	80.646	735	735	1.43	33	17	3		0	209.93	7.5	21	15.8	14.3	2840900000	138820000	1143700000	593540000	964870000	138510000	211260000	176680000
protein_2328	Q9QYG0	Q9QYG0	7	7	7	Protein NDRG2	Ndrg2	sp|Q9QYG0|NDRG2_MOUSE Protein NDRG2 OS=Mus musculus OX=10090 GN=Ndrg2 PE=1 SV=1	1	7	7	7	4	3	6	7	4	3	6	7	4	3	6	7	30.7	30.7	30.7	40.789	371	371	2.43		21	5	4	0	323.31	13.7	11.3	22.4	30.7	1888300000	140600000	58109000	622900000	1066700000	273010000	231890000	148660000
protein_2329	Q9QYJ0	Q9QYJ0	4	4	4	DnaJ homolog subfamily A member 2	Dnaja2	sp|Q9QYJ0|DNJA2_MOUSE DnaJ homolog subfamily A member 2 OS=Mus musculus OX=10090 GN=Dnaja2 PE=1 SV=1	1	4	4	4	1	0	2	4	1	0	2	4	1	0	2	4	16.5	16.5	16.5	45.745	412	412	2.14		6	1		0.00075758	24.386	3.6	0	8	16.5	210520000	10542000	0	46808000	153170000	0	0	72275000
protein_2331	Q9QYR6	Q9QYR6	62	62	61	Microtubule-associated protein 1A;MAP1A heavy chain;MAP1 light chain LC2	Map1a	sp|Q9QYR6|MAP1A_MOUSE Microtubule-associated protein 1A OS=Mus musculus OX=10090 GN=Map1a PE=1 SV=2	1	62	62	61	10	56	22	38	10	56	22	38	10	55	21	37	28.6	28.6	28.2	300.14	2776	2776	1.41	125	17	19	4	0	323.31	4.2	27.8	9.3	16.6	10481000000	451320000	6107600000	1131400000	2790400000	483550000	1241600000	639260000
protein_2347	Q9QZQ8	Q9QZQ8	5	5	3	Core histone macro-H2A.1	H2afy	sp|Q9QZQ8|H2AY_MOUSE Core histone macro-H2A.1 OS=Mus musculus OX=10090 GN=Macroh2a1 PE=1 SV=3	1	5	5	3	1	1	3	5	1	1	3	5	0	0	2	3	18	18	11	39.735	372	372	2.42		8	3	1	0	41.829	2.4	2.4	10.2	18	246490000	12384000	4628800	51019000	178450000	0	0	40642000
protein_2352	Q9R0K7	Q9R0K7	29	18	18	Plasma membrane calcium-transporting ATPase 2	Atp2b2	sp|Q9R0K7|AT2B2_MOUSE Plasma membrane calcium-transporting ATPase 2 OS=Mus musculus OX=10090 GN=Atp2b2 PE=1 SV=2	1	29	18	18	11	24	14	20	4	14	9	11	4	14	9	11	28.4	21	21	132.59	1198	1198	1.09	50	5			0	323.31	11.3	24.7	15.7	19.9	3636600000	217980000	1922000000	418160000	1078400000	433940000	425460000	279420000
protein_2357	Q9R0P3	Q9R0P3	6	6	6	S-formylglutathione hydrolase	Esd	sp|Q9R0P3|ESTD_MOUSE S-formylglutathione hydrolase OS=Mus musculus OX=10090 GN=Esd PE=1 SV=1	1	6	6	6	2	5	4	4	2	5	4	4	2	5	4	4	25.9	25.9	25.9	31.319	282	282	3.12			15	2	0	37.003	8.9	18.1	12.8	20.2	663470000	73189000	247840000	147610000	194840000	197910000	294550000	205890000
protein_2358	Q9R0P5	Q9R0P5	5	5	5	Destrin	Dstn	sp|Q9R0P5|DEST_MOUSE Destrin OS=Mus musculus OX=10090 GN=Dstn PE=1 SV=3	1	5	5	5	4	5	2	3	4	5	2	3	4	5	2	3	38.2	38.2	38.2	18.521	165	165	3.89			2	17	0	64.981	32.7	38.2	14.5	23	1583200000	282970000	797540000	303140000	199600000	391930000	747550000	953240000
protein_2359	Q9R0P9	Q9R0P9	10	10	10	Ubiquitin carboxyl-terminal hydrolase isozyme L1	Uchl1	sp|Q9R0P9|UCHL1_MOUSE Ubiquitin carboxyl-terminal hydrolase isozyme L1 OS=Mus musculus OX=10090 GN=Uchl1 PE=1 SV=1	1	10	10	10	5	9	6	5	5	9	6	5	5	9	6	5	48.4	48.4	48.4	24.838	223	223	3.12			29	4	0	292.35	26.9	43.9	38.1	22.9	6314900000	1303800000	2729300000	1721200000	560470000	1982400000	2709900000	1616300000
protein_2360	Q9R0Q6	Q9R0Q6	5	5	5	Actin-related protein 2/3 complex subunit 1A	Arpc1a	sp|Q9R0Q6|ARC1A_MOUSE Actin-related protein 2/3 complex subunit 1A OS=Mus musculus OX=10090 GN=Arpc1a PE=1 SV=1	1	5	5	5	4	3	3	5	4	3	3	5	4	3	3	5	17	17	17	41.626	370	370	2.71	1	7	14	2	0	36.301	12.7	9.5	9.5	17	797730000	104190000	134780000	242130000	316640000	127400000	144030000	214810000
protein_2363	Q9R0X4;Q32MW3	Q9R0X4;Q32MW3	8;6	8;6	8;6	Acyl-coenzyme A thioesterase 9, mitochondrial;Acyl-coenzyme A thioesterase 10, mitochondrial	Acot9;Acot10	sp|Q9R0X4|ACOT9_MOUSE Acyl-coenzyme A thioesterase 9, mitochondrial OS=Mus musculus OX=10090 GN=Acot9 PE=1 SV=1;sp|Q32MW3|ACO10_MOUSE Acyl-coenzyme A thioesterase 10, mitochondrial OS=Mus musculus OX=10090 GN=Acot10 PE=2 SV=1	2	8	8	8	1	0	5	6	1	0	5	6	1	0	5	6	16.6	16.6	16.6	50.56	439	439;439	2.08		11	1		0	55.073	1.8	0	10.7	14.8	152920000	0	0	78634000	74288000	0	0	31542000
protein_2364	Q9R0Y5	Q9R0Y5	7	7	7	Adenylate kinase isoenzyme 1	Ak1	sp|Q9R0Y5|KAD1_MOUSE Adenylate kinase isoenzyme 1 OS=Mus musculus OX=10090 GN=Ak1 PE=1 SV=1	1	7	7	7	4	6	5	4	4	6	5	4	4	6	5	4	47.4	47.4	47.4	21.539	194	194	3.27			22	8	0	114.61	29.9	47.4	36.6	30.4	2118000000	517460000	888970000	425960000	285610000	700810000	757550000	347140000
protein_2365	Q9R111	Q9R111	19	19	19	Guanine deaminase	Gda	sp|Q9R111|GUAD_MOUSE Guanine deaminase OS=Mus musculus OX=10090 GN=Gda PE=1 SV=1	1	19	19	19	8	6	15	19	8	6	15	19	8	6	15	19	38.5	38.5	38.5	51.012	454	454	2.17	2	52	5	4	0	184.52	20.7	15	33.3	38.5	3602300000	248230000	70785000	1519800000	1763500000	188580000	211950000	282750000
protein_2366	Q9R1P0	Q9R1P0	6	6	6	Proteasome subunit alpha type-4	Psma4	sp|Q9R1P0|PSA4_MOUSE Proteasome subunit alpha type-4 OS=Mus musculus OX=10090 GN=Psma4 PE=1 SV=1	1	6	6	6	4	6	6	3	4	6	6	3	4	6	6	3	19.5	19.5	19.5	29.47	261	261	3.17			19	4	0	45.532	13.4	19.5	19.5	10.3	670700000	138030000	272100000	173500000	87058000	215710000	275190000	203230000
protein_2369	Q9R1P4	Q9R1P4	10	10	10	Proteasome subunit alpha type-1	Psma1	sp|Q9R1P4|PSA1_MOUSE Proteasome subunit alpha type-1 OS=Mus musculus OX=10090 GN=Psma1 PE=1 SV=1	1	10	10	10	6	9	8	6	6	9	8	6	6	9	8	6	37.3	37.3	37.3	29.546	263	263	3			32		0	75.383	27.4	36.9	28.5	28.1	1152900000	217960000	483500000	282920000	168540000	240930000	293640000	215800000
protein_2370	Q9R1Q8	Q9R1Q8	12	12	10	Transgelin-3	Tagln3	sp|Q9R1Q8|TAGL3_MOUSE Transgelin-3 OS=Mus musculus OX=10090 GN=Tagln3 PE=1 SV=1	1	12	12	10	8	12	7	7	8	12	7	7	7	10	6	5	60.3	60.3	49.2	22.47	199	199	3.29			37	15	0	323.31	42.2	60.3	30.2	29.6	1969300000	315930000	1105300000	413910000	134130000	153410000	347600000	364650000
protein_2373	Q9R1T4	Q9R1T4	13	7	7	Septin-6	Sept6	sp|Q9R1T4|SEPT6_MOUSE Septin-6 OS=Mus musculus OX=10090 GN=Septin6 PE=1 SV=4	1	13	7	7	7	6	13	10	3	2	7	5	3	2	7	5	26.7	15.2	15.2	49.619	434	434	2.12	3	16	4	1	0	92.688	18	13.4	26.7	23.3	1427400000	193100000	49574000	627720000	557050000	320060000	294490000	249730000
protein_2374	Q9R1V6	Q9R1V6	5	5	5	Disintegrin and metalloproteinase domain-containing protein 22	Adam22	sp|Q9R1V6|ADA22_MOUSE Disintegrin and metalloproteinase domain-containing protein 22 OS=Mus musculus OX=10090 GN=Adam22 PE=1 SV=2	1	5	5	5	2	4	2	4	2	4	2	4	2	4	2	4	6.5	6.5	6.5	99.714	904	904	2	9	2	7	1	0	39.201	3	4.5	3.1	6.3	597990000	110740000	292810000	38700000	155740000	177420000	84327000	72878000
protein_2377	Q9R257	Q9R257	3	3	3	Heme-binding protein 1	Hebp1	sp|Q9R257|HEBP1_MOUSE Heme-binding protein 1 OS=Mus musculus OX=10090 GN=Hebp1 PE=1 SV=2	1	3	3	3	1	1	2	2	1	1	2	2	1	1	2	2	17.4	17.4	17.4	21.067	190	190	3.17			5	1	0.0013219	18.95	6.3	8.4	14.7	14.7	125070000	1496200	48550000	40721000	34304000	0	0	77672000
protein_2381	Q9WTP7	Q9WTP7	8	8	8	GTP:AMP phosphotransferase AK3, mitochondrial	Ak3	sp|Q9WTP7|KAD3_MOUSE GTP:AMP phosphotransferase AK3, mitochondrial OS=Mus musculus OX=10090 GN=Ak3 PE=1 SV=3	1	8	8	8	4	6	2	3	4	6	2	3	4	6	2	3	36.6	36.6	36.6	25.426	227	227	3			16		0	54.235	21.1	31.7	8.8	18.9	400580000	63373000	200300000	79411000	57503000	107230000	149500000	141330000
protein_2382	Q9WTT4	Q9WTT4	6	6	6	V-type proton ATPase subunit G 2	Atp6v1g2	sp|Q9WTT4|VATG2_MOUSE V-type proton ATPase subunit G 2 OS=Mus musculus OX=10090 GN=Atp6v1g2 PE=1 SV=1	1	6	6	6	2	6	4	3	2	6	4	3	2	6	4	3	43.2	43.2	43.2	13.651	118	118	4				21	0	184.32	10.2	43.2	23.7	23.7	2318400000	57851000	1443700000	631540000	185320000	473970000	872580000	1119500000
protein_2389	Q9WUA3	Q9WUA3	21	19	18	ATP-dependent 6-phosphofructokinase, platelet type	Pfkp	sp|Q9WUA3|PFKAP_MOUSE ATP-dependent 6-phosphofructokinase, platelet type OS=Mus musculus OX=10090 GN=Pfkp PE=1 SV=1	1	21	19	18	4	19	8	16	3	17	6	14	2	16	6	13	23.3	21	18.6	85.454	784	784	1.4	37	12	3	1	0	154.93	6.6	22.4	7.8	21.2	1806600000	36091000	1060700000	173710000	536090000	43292000	190030000	60463000
protein_2390	Q9WUB3;Q9ET01	Q9WUB3	17;4	12;1	12;1	Glycogen phosphorylase, muscle form	Pygm	sp|Q9WUB3|PYGM_MOUSE Glycogen phosphorylase, muscle form OS=Mus musculus OX=10090 GN=Pygm PE=1 SV=3	2	17	12	12	4	15	4	13	2	11	1	8	2	11	1	8	24.3	17.9	17.9	97.285	842	842;850	1.2	22	1	2		0	84.794	5	21	4.8	18.5	504260000	12368000	306090000	15165000	170640000	46186000	43157000	44512000
protein_2396	Q9WUM5	Q9WUM5	8	8	8	Succinyl-CoA ligase [ADP/GDP-forming] subunit alpha, mitochondrial	Suclg1	sp|Q9WUM5|SUCA_MOUSE Succinate--CoA ligase [ADP/GDP-forming] subunit alpha, mitochondrial OS=Mus musculus OX=10090 GN=Suclg1 PE=1 SV=4	1	8	8	8	3	7	4	4	3	7	4	4	3	7	4	4	26	26	26	36.154	346	346	3.08		1	22	3	0	104.77	11.6	23.1	15.3	11.8	1860100000	296080000	764350000	537260000	262410000	423770000	476580000	347070000
protein_2399	Q9WUR9	Q9WUR9	7	7	7	Adenylate kinase 4, mitochondrial	Ak4	sp|Q9WUR9|KAD4_MOUSE Adenylate kinase 4, mitochondrial OS=Mus musculus OX=10090 GN=Ak4 PE=1 SV=1	1	7	7	7	5	4	5	6	5	4	5	6	5	4	5	6	38.6	38.6	38.6	25.061	223	223	3			20		0	67.485	28.7	22.9	25.1	34.5	673710000	163120000	177190000	205550000	127860000	247220000	194100000	192940000
protein_2402	Q9WV34	Q9WV34	17	17	15	MAGUK p55 subfamily member 2	Mpp2	sp|Q9WV34|MPP2_MOUSE MAGUK p55 subfamily member 2 OS=Mus musculus OX=10090 GN=Mpp2 PE=1 SV=1	1	17	17	15	7	5	13	15	7	5	13	15	5	5	11	13	36.2	36.2	33.9	61.554	552	552	2.35		34	13	2	0	146.3	15	12	29	31.2	1131300000	127900000	48218000	374440000	580740000	126270000	41032000	83161000
protein_2404	Q9WV55	Q9WV55	7	7	6	Vesicle-associated membrane protein-associated protein A	Vapa	sp|Q9WV55|VAPA_MOUSE Vesicle-associated membrane protein-associated protein A OS=Mus musculus OX=10090 GN=Vapa PE=1 SV=2	1	7	7	6	4	7	3	6	4	7	3	6	3	6	2	5	20.5	20.5	20.5	27.855	249	249	3.12			21	3	0	323.31	13.3	20.5	13.3	20.1	1202000000	293900000	505970000	159810000	242310000	304280000	309840000	201200000
protein_2406	Q9WV69	Q9WV69	6	6	6	Dematin	Dmtn	sp|Q9WV69|DEMA_MOUSE Dematin OS=Mus musculus OX=10090 GN=Dmtn PE=1 SV=1	1	6	6	6	1	1	4	4	1	1	4	4	1	1	4	4	17	17	17	45.468	405	405	2.18		9	2		0	41.305	3	3	10.4	12.6	222890000	4146800	6727400	119030000	92983000	0	0	57641000
protein_2409	Q9WV92	Q9WV92	31	31	28	Band 4.1-like protein 3;Band 4.1-like protein 3, N-terminally processed	Epb41l3	sp|Q9WV92|E41L3_MOUSE Band 4.1-like protein 3 OS=Mus musculus OX=10090 GN=Epb41l3 PE=1 SV=1	1	31	31	28	4	26	11	21	4	26	11	21	4	24	11	18	35.6	35.6	33.5	103.34	929	929	1.16	65	10	1		0	255.65	5.7	31.5	13.2	21.2	3300400000	87506000	1700600000	355840000	1156400000	74424000	223630000	123610000
protein_2410	Q9WV98	Q9WV98	2	2	2	Mitochondrial import inner membrane translocase subunit Tim9	Timm9	sp|Q9WV98|TIM9_MOUSE Mitochondrial import inner membrane translocase subunit Tim9 OS=Mus musculus OX=10090 GN=Timm9 PE=1 SV=1	1	2	2	2	2	2	1	0	2	2	1	0	2	2	1	0	25.8	25.8	25.8	10.344	89	89	4				5	0.0010411	12.217	25.8	25.8	9	0	202240000	105960000	90488000	5785900	0	294150000	157030000	0
protein_2413	Q9WVJ2	Q9WVJ2	4	4	4	26S proteasome non-ATPase regulatory subunit 13	Psmd13	sp|Q9WVJ2|PSD13_MOUSE 26S proteasome non-ATPase regulatory subunit 13 OS=Mus musculus OX=10090 GN=Psmd13 PE=1 SV=1	1	4	4	4	0	0	4	3	0	0	4	3	0	0	4	3	11.4	11.4	11.4	42.809	376	376	2		7			0.00078309	25.196	0	0	11.4	8.8	164140000	0	0	95968000	68174000	0	0	42155000
protein_2415	Q9WVK8	Q9WVK8	8	8	8	Cholesterol 24-hydroxylase	Cyp46a1	sp|Q9WVK8|CP46A_MOUSE Cholesterol 24-hydroxylase OS=Mus musculus OX=10090 GN=Cyp46a1 PE=1 SV=1	1	8	8	8	0	0	4	7	0	0	4	7	0	0	4	7	16.8	16.8	16.8	56.813	500	500	2		11			0	47.585	0	0	8	14.8	181870000	0	0	65171000	116700000	0	0	37882000
protein_2418	Q9Z0E0	Q9Z0E0	14	14	14	Neurochondrin	Ncdn	sp|Q9Z0E0|NCDN_MOUSE Neurochondrin OS=Mus musculus OX=10090 GN=Ncdn PE=1 SV=1	1	14	14	14	8	12	14	14	8	12	14	14	8	12	14	14	21	21	21	78.894	729	729	1.95	23	38	7	6	0	207.05	11	17.1	21	21	3646500000	178410000	627390000	1270600000	1570100000	296750000	136700000	296090000
protein_2422	Q9Z0P4	Q9Z0P4	11	11	11	Paralemmin-1	Palm	sp|Q9Z0P4|PALM_MOUSE Paralemmin-1 OS=Mus musculus OX=10090 GN=Palm PE=1 SV=1	1	11	11	11	5	6	8	8	5	6	8	8	5	6	8	8	34.7	34.7	34.7	41.614	383	383	2.37	3	25	8	5	0	82.217	14.9	17.2	25.8	25.6	1126900000	98791000	104280000	509940000	413860000	155960000	71183000	141860000
protein_2425	Q9Z0S1	Q9Z0S1	4	4	4	3(2),5-bisphosphate nucleotidase 1	Bpnt1	sp|Q9Z0S1|BPNT1_MOUSE 3(2),5-bisphosphate nucleotidase 1 OS=Mus musculus OX=10090 GN=Bpnt1 PE=1 SV=2	1	4	4	4	1	0	2	4	1	0	2	4	1	0	2	4	15.3	15.3	15.3	33.196	308	308	2.25		6	2		0.00081766	26.704	4.2	0	6.8	15.3	207410000	17032000	0	64004000	126380000	0	0	55806000
protein_2427	Q9Z0Y1	Q9Z0Y1	4	4	4	Dynactin subunit 3	Dctn3	sp|Q9Z0Y1|DCTN3_MOUSE Dynactin subunit 3 OS=Mus musculus OX=10090 GN=Dctn3 PE=1 SV=2	1	4	4	4	3	3	0	1	3	3	0	1	3	3	0	1	19.4	19.4	19.4	20.978	186	186	3.25			6	2	0.00077042	24.822	14.5	15.1	0	4.3	164360000	63784000	91028000	0	9550000	144130000	113740000	0
protein_2433	Q9Z1B3	Q9Z1B3	26	26	26	1-phosphatidylinositol 4,5-bisphosphate phosphodiesterase beta-1	Plcb1	sp|Q9Z1B3|PLCB1_MOUSE 1-phosphatidylinositol 4,5-bisphosphate phosphodiesterase beta-1 OS=Mus musculus OX=10090 GN=Plcb1 PE=1 SV=2	1	26	26	26	5	22	9	19	5	22	9	19	5	22	9	19	21.5	21.5	21.5	138.39	1216	1216	1.33	50	8	5	1	0	196.65	4.4	17.4	8.7	17.3	2245900000	89913000	1145700000	268600000	741700000	87495000	162460000	92289000
protein_2434	Q9Z1G3;Q99L60	Q9Z1G3	14;1	14;1	14;1	V-type proton ATPase subunit C 1	Atp6v1c1	sp|Q9Z1G3|VATC1_MOUSE V-type proton ATPase subunit C 1 OS=Mus musculus OX=10090 GN=Atp6v1c1 PE=1 SV=4	2	14	14	14	5	5	10	13	5	5	10	13	5	5	10	13	37.4	37.4	37.4	43.887	382	382;427	2.36		28	13	1	0	182.61	12.3	9.7	23.8	35.3	2270100000	103640000	77117000	933800000	1155600000	206320000	209040000	326820000
protein_2435	Q9Z1G4;P15920;Q920R6	Q9Z1G4	23;2;1	23;2;1	23;2;1	V-type proton ATPase 116 kDa subunit a isoform 1	Atp6v0a1	sp|Q9Z1G4|VPP1_MOUSE V-type proton ATPase 116 kDa subunit a1 OS=Mus musculus OX=10090 GN=Atp6v0a1 PE=1 SV=3	3	23	23	23	14	20	14	19	14	20	14	19	14	20	14	19	28.7	28.7	28.7	96.466	839	839;856;833	1.78	66	17	23	9	0	323.31	17	26.5	17.5	25.5	8950100000	1280000000	3409500000	1640800000	2619800000	653350000	419930000	450830000
protein_2439	Q9Z1P6	Q9Z1P6	6	6	6	NADH dehydrogenase [ubiquinone] 1 alpha subcomplex subunit 7	Ndufa7	sp|Q9Z1P6|NDUA7_MOUSE NADH dehydrogenase [ubiquinone] 1 alpha subcomplex subunit 7 OS=Mus musculus OX=10090 GN=Ndufa7 PE=1 SV=3	1	6	6	6	4	6	0	0	4	6	0	0	4	6	0	0	53.1	53.1	53.1	12.575	113	113	4				10	0	42.943	41.6	53.1	0	0	301800000	113310000	188480000	0	0	188060000	138130000	0
protein_2443	Q9Z1S5	Q9Z1S5	9	9	9	Neuronal-specific septin-3	Sept3	sp|Q9Z1S5|SEPT3_MOUSE Neuronal-specific septin-3 OS=Mus musculus OX=10090 GN=Septin3 PE=1 SV=2	1	9	9	9	5	4	8	9	5	4	8	9	5	4	8	9	28.3	28.3	28.3	40.037	350	350	2.44	3	24	13	5	0	223.42	15.1	12.3	23.7	28.3	2594200000	401240000	147180000	1233400000	812360000	416740000	252580000	302740000
protein_2447	Q9Z1Z2	Q9Z1Z2	5	5	5	Serine-threonine kinase receptor-associated protein	Strap	sp|Q9Z1Z2|STRAP_MOUSE Serine-threonine kinase receptor-associated protein OS=Mus musculus OX=10090 GN=Strap PE=1 SV=2	1	5	5	5	1	0	3	3	1	0	3	3	1	0	3	3	16	16	16	38.442	350	350	2.25		6	2		0	30.737	3.1	0	9.4	9.7	116570000	6221200	0	59981000	50368000	0	0	29128000
protein_2450	Q9Z218	Q9Z218	15	13	13	Dipeptidyl aminopeptidase-like protein 6	Dpp6	sp|Q9Z218|DPP6_MOUSE Dipeptidyl aminopeptidase-like protein 6 OS=Mus musculus OX=10090 GN=Dpp6 PE=1 SV=1	1	15	13	13	4	14	4	10	3	12	3	8	3	12	3	8	22.4	20.3	20.3	91.259	804	804	1.29	25	3	3		0	115.92	5.2	20.9	5.1	12.9	825430000	70513000	452780000	86746000	215390000	54814000	183530000	78787000
protein_2456	Q9Z2D6	Q9Z2D6	4	4	4	Methyl-CpG-binding protein 2	Mecp2	sp|Q9Z2D6|MECP2_MOUSE Methyl-CpG-binding protein 2 OS=Mus musculus OX=10090 GN=Mecp2 PE=1 SV=1	1	4	4	4	0	2	3	3	0	2	3	3	0	2	3	3	10.1	10.1	10.1	52.307	484	484	1.75	2	6			0.00075188	24.231	0	5.8	7.2	8.1	83374000	0	19490000	33368000	30515000	0	0	24174000
protein_2458	Q9Z2H5	Q9Z2H5	18	16	16	Band 4.1-like protein 1	Epb41l1	sp|Q9Z2H5|E41L1_MOUSE Band 4.1-like protein 1 OS=Mus musculus OX=10090 GN=Epb41l1 PE=1 SV=2	1	18	16	16	2	14	4	9	2	13	4	7	2	13	4	7	22.6	21.3	21.3	98.314	879	879	1.17	26	3	1		0	236.15	3.2	19.5	5.9	10.6	828970000	27923000	401900000	136690000	262470000	96118000	140410000	102650000
protein_2462	Q9Z2I9	Q9Z2I9	14	14	14	Succinyl-CoA ligase [ADP-forming] subunit beta, mitochondrial	Sucla2	sp|Q9Z2I9|SUCB1_MOUSE Succinate--CoA ligase [ADP-forming] subunit beta, mitochondrial OS=Mus musculus OX=10090 GN=Sucla2 PE=1 SV=2	1	14	14	14	6	4	10	14	6	4	10	14	6	4	10	14	29.2	29.2	29.2	50.113	463	463	2.28	1	32	7	3	0	127.6	12.5	8	22.5	29.2	2276000000	249580000	101830000	674980000	1249600000	212390000	256640000	310440000
protein_2463	Q9Z2Q6;P42209	Q9Z2Q6	10;2	10;2	8;0	Septin-5	Sept5	sp|Q9Z2Q6|SEPT5_MOUSE Septin-5 OS=Mus musculus OX=10090 GN=Septin5 PE=1 SV=2	2	10	10	8	5	4	8	10	5	4	8	10	5	4	8	8	25.5	25.5	20.9	42.747	369	369;366	2.42	2	30	13	5	0	323.31	15.7	12.5	20.9	25.5	4891200000	988640000	236170000	1638100000	2028400000	748850000	296810000	730090000
protein_2464	Q9Z2U0;Q9CWH6	Q9Z2U0;Q9CWH6	10;5	10;5	10;5	Proteasome subunit alpha type-7;Proteasome subunit alpha type-7-like	Psma7;Psma8	sp|Q9Z2U0|PSA7_MOUSE Proteasome subunit alpha type-7 OS=Mus musculus OX=10090 GN=Psma7 PE=1 SV=1;sp|Q9CWH6|PSMA8_MOUSE Proteasome subunit alpha type-8 OS=Mus musculus OX=10090 GN=Psma8 PE=1 SV=1	2	10	10	10	4	7	5	5	4	7	5	5	4	7	5	5	41.9	41.9	41.9	27.855	248	248;250	3.08	1		21	4	0	77.179	12.5	27.4	21.4	21.4	948430000	101230000	469370000	216070000	161760000	157060000	298150000	179230000
protein_2465	Q9Z2U1	Q9Z2U1	6	6	6	Proteasome subunit alpha type-5	Psma5	sp|Q9Z2U1|PSA5_MOUSE Proteasome subunit alpha type-5 OS=Mus musculus OX=10090 GN=Psma5 PE=1 SV=1	1	6	6	6	5	6	2	5	5	6	2	5	5	6	2	5	29.9	29.9	29.9	26.411	241	241	3.11			17	2	0	51.897	25.7	29.9	12	24.9	844600000	151220000	371530000	166360000	155490000	218400000	454520000	405930000
protein_2469	Q9Z2Y3;Q99JP6	Q9Z2Y3	12;1	12;1	11;0	Homer protein homolog 1	Homer1	sp|Q9Z2Y3|HOME1_MOUSE Homer protein homolog 1 OS=Mus musculus OX=10090 GN=Homer1 PE=1 SV=2	2	12	12	11	3	3	8	11	3	3	8	11	3	3	7	10	33.3	33.3	31.1	41.412	366	366;356	2.16		27	5		0	129.23	8.2	9.3	22.4	29.8	1209100000	94076000	28874000	366340000	719840000	173750000	58055000	194970000
[truncated: 24 more columns]
